# Supplementary material for: Integrative proteomic and phosphoproteomic analysis of granulosa cells during follicular atresia in porcine
Source: bioRxiv preprint, doi:10.1101/2020.08.31.276436, version 1 (2020-09-01)
Supplement: Supplemental Data [file 276436_file03.zip]

Archive with 11 entries (10 files):
- Supplemental Data/
- Supplemental Data/Fig S1--motif-x--Phosphoproteomic.pdf
- Supplemental Data/S1 File--Functional_classification-Proteomic.rar
- Supplemental Data/S2 File--Enrichment_pathway_image-Proteomic.rar
- Supplemental Data/S3 File--Functional_classification-Phosphoproteomic.rar
- Supplemental Data/S4 File--Kinase analysis.rar
- Supplemental Data/Supplemental Materials data.docx
- Supplemental Data/Table S1--MS_identified_information-Proteomic.xlsx
- Supplemental Data/Table S2--Differentially expressed statistics-Proteomic.xlsx
- Supplemental Data/Table S3--MS_identified_information-Phosphoproteomic.xlsx
- Supplemental Data/Table S4--Differentially expressed statistics-Phosphoproteomic.xlsx
