# Supplementary material for: Integrative proteomic and phosphoproteomic analysis of granulosa cells during follicular atresia in porcine
Source: bioRxiv preprint, doi:10.1101/2020.08.31.276436, version 1 (2020-09-01)
Supplement: Supplemental Data [file 276436_file03.zip › Supplemental Data/Table S1--MS_identified_information-Proteomic.xlsx]

## Sheet: Summary
Header line description of table 1			Table 1. MS/MS spetrum database search analysis summary
Identified proteins	Number of proteins detected by spetrum search analysis
Quantifiable proteins	Number of proteins quantifiable				Identified proteins	Quantifiable proteins
					7104	6201
Header line description of worksheet "Quant" and "repeat1-3"			Table 2. Differentially expressed protein summary (Filtered whith threshold value of expression fold change and P vlaue < 0.05)
Protein accession	Protein accession number of database used for search
Protein description	Protein functional description		Compare group	Regulated type	fold change >1.5
Gene name	Indicates the name of the gene that code for the protein sequence		A/SA	up-regulated	12
MW [kDa]	Protein molecular weight ,unit [kDa]			down-regulated	12
Score	A simple rule to be used to judge whether a result is significant or not		H/A	up-regulated	627
Coverage [%]	Percent of identified peptdie sequence covering in protein sequence			down-regulated	827
#Peptides	Number of identified peptides		H/SA	up-regulated	572
#PSMs	Number of spectrum which protein matched			down-regulated	743
#Unique peptides	Number of identified peptides that only come form this protein groups

## Sheet: Combine
Identified protein information						repeat1			repeat2			repeat3			Quantitation of samples
Protein accession	Protein description (pig)	Gene name	Protein description (human)	Protein description (mouse)	MW [kDa]	A1	H1	SA1	A2	H2	SA2	A3	H3	SA3	H/SA Ratio	H/SA P value	H/A Ratio	H/A P value	A/SA Ratio	A/SA P value
A0A075B7I5	Uncharacterized protein (Fragment)	---	Ig lambda chain V region 4A OS=Homo sapiens PE=4 SV=1	Ig lambda-2 chain V region OS=Mus musculus PE=3 SV=1	11.95				0.930776	0.580017	1.43376				0.404542		0.623154		0.649185
A0A075B7I6	Uncharacterized protein (Fragment)	---	Ig lambda chain V-IV region Bau OS=Homo sapiens PE=1 SV=1	Ig kappa chain V-III region CBPC 101 OS=Mus musculus PE=1 SV=1	12.329	1.07539	0.558892	1.33467	0.903548	0.597526	1.44326	1.22849	0.695301	1.0948	0.478142	0.0131869	0.577321	0.0262588	0.828208	0.187213
A0A0C3SG01	Apolipoprotein A-I	APOA1			30.33	1.6321	0.191062	1.18091	1.49902	0.202297	1.19472	1.58791	0.258809	1.1729	0.183785	0.000166523	0.1382	6.6277e-05	1.32985	0.00855113
A0A0R4J8D5	ICT1	MRPL18			20.549	0.97355	1.01802	1.0077	0.940895	1.17802	0.897155	0.999338	0.996341	1.00425	1.09738	0.248312	1.09562	0.24205	1.00161	0.971462
A0A0R4J8D6	Mrpl34	MRPL49			18.975	0.703665	1.5294	0.786565				0.833195	1.2426	0.903822	1.63986	0.1273	1.80367	0.102759	0.909176	0.473021
A0A0R4J8D7	ICT1	MRPL28			30.1	0.833929	1.26976	0.886639	0.834247	1.37923	0.817417	0.795471	1.42198	0.766608	1.64772	0.000992086	1.65242	0.004374	0.99716	0.954349
A0A140TAJ8	Proto-oncogene c-Fos	FOS			40.678	0.756496	1.37803	0.876755							1.57174		1.8216		0.862836
A0A140TAK0	Protein RTF2 homolog	RTFDC1			33.53	1.07724	0.957481	0.968276	1.0315	1.11743	0.908258	1.02619	0.976578	0.99942	1.06103	0.379881	0.973383	0.643949	1.09005	0.0631769
A0A140TAK2	Uncharacterized protein	---	Mannosyl-oligosaccharide glucosidase OS=Homo sapiens GN=MOGS PE=1 SV=5	Mannosyl-oligosaccharide glucosidase OS=Mus musculus GN=Mogs PE=2 SV=1	82.864	0.932215	1.07515	0.977758	0.899257	1.12489	0.98155				1.12286	0.127973	1.20124	0.0350791	0.934754	0.156616
A0A140TAL0	Mannose-1-phosphate guanyltransferase alpha	GMPPA			46.044	1.25854	0.485062	1.23476	1.16915	0.742086	1.07249	1.07003	0.708276	1.22647	0.547702	0.00799764	0.553338	0.00843833	0.989813	0.881923
A0AAS4	Phosphatidylcholine:ceramide cholinephosphotransferase 1	SGMS1			48.984				0.649505	1.54281	0.842396				1.83145		2.37536		0.771021
A1E295	Cathepsin B	CTSB			36.9	1.12186	0.793925	1.0469	1.04159	0.691471	1.1849	1.14649	0.853827	0.934602	0.738765	0.0410311	0.706727	0.00711079	1.04533	0.591241
A1X898	Procollagen-proline 2-oxoglutarate-4-dioxygenase	P4HA1			60.934	1.02549	0.864965	1.10263	0.966574	0.892565	1.12693	1.03188	0.850635	1.13986	0.774068	0.000113136	0.862506	0.00842592	0.897464	0.0159064
A1XQS2	Mitochondrial import receptor subunit TOM7 homolog	TOMM7			6.2184	0.953414	1.2329	0.829494							1.48633		1.29315		1.14939
A1XQS3	Mitochondrial NDUFA4	NDUFA4			9.3107	0.88503	1.23358	0.903377	0.789516	1.33674	0.884712	0.871117	1.12651	0.988867	1.33126	0.0203803	1.45221	0.0117526	0.91671	0.15333
A1XQT6	MLC1f	MYL1			20.918	0.92757	1.12278	0.953885	1.03983	0.981022	0.980247	1.01299	0.995545	0.992586	1.05898	0.328763	1.03991	0.5231	1.01834	0.657929
A1XQU1	Proteasome subunit beta type-7	PSMB7			29.98	0.4388	2.06892	0.458306	0.599925	1.76078	0.724749	0.490689	1.93766	0.515685	3.39508	0.000374065	3.77096	0.000731081	0.900322	0.587214
A1XQU3	60S ribosomal protein L14	RPL14			23.33	1.37475	0.400154	1.20619	1.40924	0.608763	1.00016	1.35437	0.368482	1.23819	0.399879	0.00289408	0.332837	0.00500609	1.20143	0.0841272
A1XQU5	60S ribosomal protein L27	RPL27			15.798	0.798882	1.45681	0.768227	0.82223	1.77874	0.43194	0.994846	1.28569	0.671819	2.4152	0.0099675	1.72833	0.0330106	1.39742	0.116275
A1XQV4	Tropomyosin alpha-3 chain	TPM3			33.058
A1Y2K1	Tyrosine-protein kinase Fyn	FYN			60.688	1.0538	0.768238	1.16286	1.04832	0.972128	0.980312				0.81205	0.280338	0.827908	0.326562	0.980846	0.859195
A2BD09	Olfactomedin-like protein 2A	OLFML2A			72.527	1.29216	0.474768	1.21344	1.10426	0.405205	1.429	1.16822	0.475708	1.36836	0.338007	0.00226336	0.380314	0.00191874	0.888759	0.1553
A2SW51	Monocyte differentiation antigen CD14	CD14			39.77	1.41581	0.737918	0.859606							0.858437		0.521199		1.64704
A2TEQ2	Poliovirus receptor related 2	prr2			51.525	0.619182	1.7211	0.699893	0.667992	1.65823	0.723682				2.37383	0.00918717	2.62539	0.00195985	0.904184	0.174135
A3EX84	Galectin	LGALS3			27.214	1.32804	0.279169	1.34581	1.32096	0.313528	1.28504	1.53114	0.337482	1.17456	0.244436	0.00113606	0.222523	0.00260927	1.09847	0.223044
A4L2Z4	Guanine nucleotide-binding protein alpha 14	GNA14			41.513	0.98747	1.05844	0.957981	1.01791	0.937875	0.993936	0.947319	1.16785	0.881001	1.11693	0.235541	1.07162	0.402373	1.04228	0.375552
A4Z6H1	Adenylosuccinate synthetase isozyme 2	ADSS			50.14	1.25809	0.483175	1.20729	1.15088	0.611624	1.16617	1.18128	0.624004	1.17728	0.484068	0.00331602	0.478741	0.000606969	1.01113	0.729552
A5A761	Sideroflexin-1	SFXN1			35.624	0.871538	1.16269	0.982161	0.907688	1.21883	0.879783	0.922345	1.05679	1.01158	1.19655	0.0401484	1.27271	0.0265329	0.940159	0.28611
A5A780	Uncharacterized protein	VPS33A	Vacuolar protein sorting-associated protein 33A OS=Homo sapiens GN=VPS33A PE=1 SV=1	Vacuolar protein sorting-associated protein 33A OS=Mus musculus GN=Vps33a PE=1 SV=2	67.58	1.09932	0.813219	1.08009	0.97514	0.95748	1.06027	1.06302	0.856738	1.0771	0.81662	0.0416128	0.837437	0.0405284	0.975142	0.546229
A5A8X7	Pre-B-cell leukemia transcription factor 2	PBX2			45.821	1.09758	0.803357	1.03983							0.772585		0.731935		1.05554
A5A8Y7	1-acyl-sn-glycerol-3-phosphate acyltransferase	AGPAT1			32.226	0.900949	1.06498	1.03111	0.909084	1.19264	0.965777				1.13057	0.251777	1.24728	0.175622	0.906427	0.209575
A5D9J0	Proteasome (Prosome, macropain) subunit, beta type, 9 (Large multifunctional protease 2) (Fragment)	PSMB9			10.743	1.35412	0.663344	0.984245							0.673962		0.489871		1.3758
A5D9K6	Bromodomain containing 2	BRD2			88.232	1.13217	0.750715	1.08115	1.11221	0.857974	1.02104	1.06944	0.965687	0.970794	0.837745	0.0977956	0.776862	0.048193	1.07837	0.111845
A5D9L6	Apolipoprotein M	APOM			13.131				1.55094	0.298624	1.11382	1.52988	0.2267	1.18339	0.228679	0.00318989	0.170514	0.0106732	1.34111	0.0399572
A5D9P0	Ring finger protein 1	RING1			42.371	1.00147	0.853229	1.10329	1.01183	0.974702	1.01972	1.08767	0.919122	1.00996	0.87682	0.0503597	0.885869	0.0602581	0.989785	0.803914
A5GFN6	mRNA export factor	RAE1			41.025	0.953454	0.987893	1.05608	0.962117	1.02213	1.02087	0.924735	1.02791	1.03552	0.976052	0.201111	1.06958	0.0176973	0.912556	0.00411425
A5GFQ0	60S ribosomal protein L7-like 1	RPL7L1			28.724	1.40521	0.386941	1.19043	1.42384	0.473129	1.04932	1.37799	0.475802	1.17686	0.390993	0.000493551	0.317532	0.000137416	1.23135	0.0207953
A5GFQ5	Protein canopy homolog 3	CNPY3			31.71	0.661933	1.59114	0.778713	0.64263	1.54997	0.845983	0.669755	1.56397	0.777926	1.95831	6.99543e-05	2.38314	1.91153e-06	0.821735	0.0154809
A5GFQ7	Peroxisomal biogenesis factor 6	PEX6			102.46	0.854299	1.31179	0.84794	0.943127	1.30419	0.783851	0.948698	1.07493	0.972229	1.41739	0.0230363	1.34404	0.0415318	1.05457	0.506015
A5GFQ9	Protein phosphatase 2, regulatory subunit B (B56), delta isoform	PPP2R5D			69.981	1.1609	0.748235	1.08735	1.16551	0.798465	1.03986	1.06158	0.861489	1.10795	0.74438	0.00394323	0.710801	0.00228901	1.04724	0.280508
A5GFR5	Novel protein similar to vertebrate chromosome 6 open reading frame 153 (C6orf153)	RRP36			28.686							0.84426	1.19984	0.943188	1.27212		1.42118		0.895113
A5GFS8	Vesicle-associated membrane protein-associated protein B	VAPB			27.053	0.892662	1.14035	0.974207	0.89196	1.20463	0.898673	0.992306	1.03041	0.99639	1.17639	0.0591454	1.21551	0.0378835	0.967817	0.528232
A5GFS9	Syntaxin 16	STX16			34.828				0.98196	0.961637	1.05035				0.915536		0.979304		0.934884
A5GFT5	Aminopeptidase-like 1	NPEPL1			55.655	0.729803	1.43516	0.855536				0.709749	1.47888	0.788182	1.77284	0.00734436	2.02427	0.00593144	0.875791	0.180006
A5GFU6	GNAS complex locus	GNAS			44.179	1.08417	0.666983	1.20261	1.08685	0.775452	1.13786	1.11553	0.729498	1.1605	0.620381	0.000780999	0.660854	0.00389259	0.938756	0.0439052
A5GFV0	Uncharacterized protein	ZFP64	Zinc finger protein 64 homolog, isoforms 3 and 4 OS=Homo sapiens GN=ZFP64 PE=2 SV=3	Zinc finger protein 64 OS=Mus musculus GN=Zfp64 PE=2 SV=1	71.971	0.989083	0.984077	1.02455	0.952693	1.0861	0.96741				1.03926	0.588211	1.06612	0.413973	0.974806	0.547653
A5GFW0	Orthologue of H. sapiens chromosome 20 open reading frame 108 (C20orf108)	C17H20orf108			20.456	0.776206	1.45632	0.787101	0.867984	1.33697	0.82378	0.867877	1.3099	0.812097	1.69345	0.00444252	1.63339	0.00113247	1.03677	0.439592
A5GFW3	Cleavage stimulation factor, 3' pre-RNA, subunit 1, 50kDa	CSTF1			48.367	1.06847	0.813162	1.07261	1.12199	0.760988	1.07876	1.093	0.850995	1.07156	0.752467	0.00909719	0.738593	0.00180405	1.01878	0.321257
A5GFX7	Cathepsin Z	CTSZ			33.791	1.34571	0.608539	1.02505	1.1839	0.486709	1.29613	1.42893	0.568825	1.02781	0.496887	0.014643	0.420375	0.00268638	1.18201	0.155833
A5GFY4	Negative elongation factor D	NELFCD			66.217	1.14286	0.781998	1.08094	1.16212	0.776175	1.05416	1.15716	0.771186	1.0625	0.728472	0.000158124	0.672808	9.02833e-06	1.08273	0.00126022
A5GFY8	D-3-phosphoglycerate dehydrogenase	PHGDH			56.809	1.18399	0.733446	1.08268	1.25192	0.71038	1.05234	1.08892	0.854908	1.0557	0.720443	0.0183396	0.652155	0.00332685	1.10471	0.137601
A5GFZ4	Dolichol-phosphate mannosyltransferase subunit 1 (Fragment)	DPM1			18.426	0.873739	1.31661	0.806602							1.6323		1.50687		1.08323
A5GFZ6	Adenylyltransferase and sulfurtransferase MOCS3	MOCS3			48.914	1.1029	0.647115	1.2288	1.09634	0.94952	0.956263	1.04229	0.831394	1.11925	0.734807	0.0698155	0.749039	0.0849169	0.981	0.819032
A5GFZ7	Uncharacterized protein	ZNF217	Zinc finger protein 217 OS=Homo sapiens GN=ZNF217 PE=1 SV=1	Protein Zfp217 OS=Mus musculus GN=Zfp217 PE=2 SV=1	113.79
A5GFZ9	Transcription factor AP-2 gamma (Activating enhancer binding protein 2 gamma)	TFAP2C			49.089	0.9912	1.02761	0.982788							1.0456		1.03673		1.00856
A5GHK3	Prefoldin subunit 4	PFDN4			15.27	0.697996	1.55941	0.734926	0.716557	1.39183	0.914115	0.459648	1.98548	0.512149	2.28426	0.0163916	2.63404	0.0156071	0.867208	0.542989
A5GHK7	Activity-dependent neuroprotector	ADNP			123.76	1.03645	0.911259	1.0276	1.03551	0.931934	1.01763	1.01231	1.0154	0.981312	0.944507	0.214111	0.92683	0.134882	1.01907	0.315057
A5GHK9	Tyrosine-protein phosphatase non-receptor type	PTPN1			49.218	1.02919	0.8596	1.10178	1.03233	0.821715	1.1276	1.18532	0.71704	1.11255	0.717656	0.0156095	0.738674	0.0143938	0.971547	0.602431
A5GHL0	RAB22A, member RAS oncogene family	RAB22A			21.794	1.24637	0.525013	1.19289	1.11426	0.773814	1.10901	1.25411	0.551654	1.16164	0.534275	0.0143926	0.511925	0.00619499	1.04366	0.398847
A5JUQ8	Crystallin zeta-like 1	CRYZL1			38.826	1.10198	0.831112	1.02985	1.13835	0.804071	1.06394	1.05481	0.987336	0.962591	0.858047	0.110063	0.795873	0.0433048	1.07812	0.109568
A5PF04	Uncharacterized protein	ZBTB12	Zinc finger and BTB domain-containing protein 12 OS=Homo sapiens GN=ZBTB12 PE=1 SV=1	Protein Zbtb12 OS=Mus musculus GN=Zbtb12 PE=2 SV=1	49.179
A6M928	Eukaryotic translation initiation factor 4A isoform 1	EIF4A1			46.153	1.22779	0.638515	1.10416	1.16544	0.694084	1.1061	1.12796	0.72966	1.11378	0.620408	0.0036082	0.58567	0.000259859	1.05931	0.151268
A6M930	Eukaryotic translation initiation factor 4A isoform 2	EIF4A2			46.402	1.09144	0.879159	0.99083	1.06548	0.89615	1.0292	0.993187	1.04807	0.989826	0.938043	0.366829	0.89628	0.170301	1.0466	0.249479
A6M931	Eukaryotic initiation factor 4A-III	EIF4A3			46.84	1.10725	0.796071	1.08079	1.09561	0.810745	1.09652	1.06856	0.757821	1.1369	0.713486	0.00016438	0.722818	0.000182792	0.987089	0.525008
A6N8P5	Multiprotein bridging factor 1	MBF1			16.396	0.466157	2.07846	0.508188	0.548252	1.96852	0.559738	0.488773	1.96278	0.508162	3.8131	8.27957e-05	3.99803	1.92484e-05	0.953743	0.467026
A7L861	Squalene epoxidase	sqle			63.754
A7TX81	COP9 signalosome complex subunit 6	COPS6			35.865	1.24919	0.762291	0.961301	1.14623	0.763099	1.06997	1.13494	0.904637	0.98427	0.805834	0.0329589	0.688324	0.00437461	1.17072	0.0254355
A7WLH8	Small ubiquitin-related modifier 1	SUMO1			11.557	1.11109	0.75421	1.06902	1.09761	0.775184	1.13363	0.983787	0.998366	1.01642	0.785247	0.0814524	0.791785	0.0862866	0.991744	0.874926
A7XNM3	Stanniocalcin 1	STC1			27.557	1.72511	0.267142	1.00754	1.60546	0.26093	1.09712				0.250905	0.0353	0.158553	0.0267706	1.58247	0.0181255
A7XP20	B-cell CLL/lymphoma 10	BCL10			26.202	1.17866	0.635798	1.16988	1.24576	0.597212	1.13007	1.25919	0.560194	1.20126	0.512167	4.66372e-05	0.486805	5.10467e-05	1.0521	0.135623
A7XUJ6	TNF receptor-associated factor 6	TRAF6			61.266	1.12676	0.682967	1.17417	1.21706	0.602528	1.15167	1.01126	0.946959	1.04252	0.662771	0.0530309	0.665394	0.0483594	0.996058	0.954373
A7Y521	COP9 signalosome complex subunit 4	COPS4			46.268	1.13589	0.77572	1.06322	1.09238	0.804142	1.09373	1.08097	0.863391	1.04473	0.763117	0.00287576	0.738313	0.00145977	1.0336	0.180304
A7YX22	Torsin A	DYT1			37.804	1.01631	1.0757	0.91582	0.885255	1.14222	0.979697	0.997053	1.08791	0.915192	1.17615	0.00509927	1.14048	0.0604672	1.03128	0.570049
A8CYZ2	Sirtuin 3	SIRT3			36.786							1.04508	0.876496	1.0818	0.810223		0.838688		0.966061
A8HG48	Solute carrier family 7 (Amino acid transporter light chain, y+L system), member 7 tv3	SLC7A7			56.241
A8U4R4	Transketolase	tkt			67.837	1.00213	1.24531	0.828918	0.93777	1.0865	0.955057	0.839926	1.39802	0.724856	1.48668	0.0253284	1.34175	0.0520089	1.10801	0.336492
A9LM01	Progesterone receptor membrane component 2	PGRMC2			23.78	0.908134	1.1176	0.981828	0.899367	1.09203	1.01103	1.04231	0.863041	1.09772	0.994206	0.950655	1.0782	0.48069	0.922097	0.242994
A9QT42	Interleukin-1 receptor-associated kinase 4	IRAK4			51.4							1.17704	0.702566	1.13451	0.619269		0.596891		1.03749
A9XFX6	F-actin capping protein beta subunit	Capzb			30.628	1.01687	1.01851	0.948021	1.00896	0.929513	1.02435	0.969422	1.10129	0.927084	1.05168	0.445917	1.01805	0.756389	1.03304	0.406134
A9YUB1	Cysteine and histidine-rich domain-containing protein 1	CHORDC1			37.35	1.17211	0.636563	1.16271	1.12946	0.703419	1.1455	1.0671	0.907058	1.05644	0.667837	0.0307983	0.667042	0.0318217	1.00119	0.977656
B0FPB3	Stearoyl-CoA desaturase 5	SCD5			37.787	0.845449	1.18474	0.972282							1.21851		1.40131		0.869551
B0FWK4	Signal peptidase complex subunit 1	SPCS1			11.775	0.645152	1.57542	0.797961				0.925401	0.955762	1.1121	1.32518	0.492513	1.61165	0.340303	0.822254	0.505569
B0LXP3	NF-kappaB transcription factor p65 subunit	RELA			60.383	1.11808	0.702728	1.14059	1.11395	0.729331	1.12011	1.18438	0.705286	1.10503	0.635033	9.42861e-06	0.625611	0.00102099	1.01506	0.551578
B1NI70	Adenylate kinase 4, mitochondrial	AK3L1			25.291	0.849118	1.13976	0.997883	0.904245	1.0928	0.974744	0.907112	1.08777	0.99904	1.11733	0.00908833	1.24802	0.00100907	0.89528	0.0193336
B2CCY7	Nuclear matrix protein 200	nmp-200			55.18	1.058	0.943039	0.998317	1.06527	0.864019	1.04771	1.04156	0.905793	1.03593	0.880236	0.0150495	0.857187	0.0155901	1.02689	0.196876
B2CPJ7	Polyamine modulated factor 1.SPMF1	PMF1			23.529	1.06109	0.981082	0.961455	1.00364	0.949968	1.03764	0.994533	0.92858	1.06029	0.934708	0.142264	0.934747	0.0670452	0.999958	0.999122
B2DCZ7	Stromal membrane-associated protein 1-like	SMAP1L			46.646
B2MU85	Jumping translocation breakpoint	JTB			16.38	1.03177	0.864668	1.09478	1.21499	0.753029	1.02085				0.764641	0.0807871	0.720015	0.123656	1.06198	0.60385
B2X0A4	17-beta-hydroxysteroid dehydrogenase type 1	HSD17B1			34.29	0.969852	0.971555	1.02835	1.00084	0.990738	0.994587	0.87025	1.05953	1.01216	0.995624	0.887853	1.06367	0.282581	0.936027	0.238313
B2ZI35	F11 receptor	F11R			32.287
B3SP85	Gamma-interferon-inducible-lysosomal thiol reductase	IFI30			27.614	1.44725	0.505691	1.09445	1.23939	0.396046	1.3133	1.58781	0.474325	0.986891	0.405363	0.012662	0.321927	0.00638974	1.25918	0.103601
B4F450	Ubiquitin-like protein 5	UBL5			8.5468	1.20263	0.535639	1.23961	1.23014	0.481563	1.24636	1.13079	0.638523	1.24045	0.444321	0.00435123	0.464626	0.00072965	0.956299	0.207752
B5APU3	Actin-related protein 2-like protein	ACTR2			44.76	1.14439	0.795307	1.02582	1.10547	0.707662	1.08991	1.126	0.830267	1.04289	0.738688	0.00666046	0.691153	0.00667926	1.06878	0.042391
B5APU8	Actin-related protein 2/3 complex subunit 3	ARPC3			20.546	1.19358	0.753525	1.04852	1.22706	0.664838	1.08757	1.13215	0.867331	1.01148	0.72618	0.0273989	0.643353	0.0085375	1.12874	0.0207831
B5APV0	Actin-related protein 2/3 complex subunit 5	ARPC5			16.32	1.18372	0.77792	1.03521	1.18694	0.672055	1.10585	1.10867	0.834053	1.06602	0.712182	0.0124924	0.656456	0.00474308	1.08489	0.0529641
B5U335	Solute carrier family 30 (Zinc transporter), member 9	SLC30A9			63.214	0.937927	1.15027	0.927044	0.948282	1.10579	0.957311	0.968154	0.962704	1.02857	1.10499	0.208503	1.12766	0.162028	0.979896	0.588955
B6CVD7	ERO1-like protein alpha	ERO1A			54.28	0.867138	1.10087	0.941848	0.881728	1.19945	1.06602	0.921783	1.02978	0.989413	1.11104	0.149732	1.24693	0.0359298	0.891024	0.0773219
B6CVL4	Uncharacterized protein	WDTC1	WD and tetratricopeptide repeats protein 1 OS=Homo sapiens GN=WDTC1 PE=1 SV=2	WD and tetratricopeptide repeats protein 1 OS=Mus musculus GN=Wdtc1 PE=1 SV=1	75.936	1.04804	0.85087	1.09252				0.999814	0.951083	1.04886	0.84149	0.141901	0.879922	0.204888	0.956323	0.288261
B6CVL5	High mobility group AT-hook 1 transcript variant 2	HMGA1			10.649	1.21567	0.587756	1.18	1.33629	0.762758	0.901163	1.3306	0.515419	1.09651	0.587201	0.0171871	0.480593	0.00369912	1.22182	0.0866704
B6DZ39	APPL2	appl2			74.161	1.221	0.63311	1.18098	1.19146	0.553735	1.20403	1.15777	0.663813	1.16872	0.520764	0.00159521	0.518358	0.000480005	1.00464	0.809524
B6E241	Growth factor receptor bound protein 2	GRB2			25.206	0.880752	1.30145	0.833209	0.800812	1.36153	0.863651	0.905627	1.3126	0.785652	1.60144	9.29576e-05	1.53664	0.00074637	1.04217	0.425464
B6ICU4	DNA-directed RNA polymerase subunit	ZNRD1			13.648
B6UV57	Nitrogen fixation 1-like protein	NFS1			50.4	0.879875	1.17286	0.981113	0.891442	1.13974	1.00821	0.866035	1.10671	0.977898	1.15236	0.00618165	1.29649	0.00213002	0.88883	0.00110309
B7U2H0	1-acylglycerol-3-phosphate O-acyltransferase 8	LCLAT1			44.5	0.994783	1.04524	0.963377	0.921285	1.16869	0.952996	1.07403	0.945274	0.986925	1.08814	0.316849	1.05655	0.515981	1.0299	0.582448
B7UCT2	SFRS protein kinase 1	SRPK1			74.363	1.04136	1.02143	0.942575	0.997587	1.16259	0.858835	1.00787	0.924199	1.00868	1.10609	0.302156	1.02015	0.797114	1.08424	0.203924
B8XH67	Na(+)/H(+) exchange regulatory cofactor NHE-RF	SLC9A3R1			39.304	0.72002	1.52388	0.784581	0.671172	1.40491	0.866016	0.63167	1.64812	0.690979	1.95462	0.00151659	2.26259	0.00311484	0.863889	0.158742
B8XSJ1	ER lipid raft-associated 1	ERLIN1			39.014	0.85238	1.12595	0.981082	0.839434	1.15122	0.987514	0.990634	0.990919	1.00164	1.10028	0.182473	1.21832	0.0482327	0.90311	0.184154
B8XSJ7	Mitogen-activated protein kinase-activated protein kinase 3	MAPKAPK3			43.297	1.19213	0.596283	1.19372	1.09907	0.792878	1.0919	1.1562	0.706975	1.14914	0.610272	0.00607163	0.608034	0.00657819	1.00368	0.921251
B8XTR3	1-acylglycerol-3-phosphate O-acyltransferase 5	AGPAT5			41.923	0.990187	1.01827	0.968661	1.08371	0.906597	1.00568	1.04376	0.95759	1.00228	0.968364	0.439695	0.924556	0.13847	1.04738	0.2186
B8XTR4	1-acylglycerol-3-phosphate O-acyltransferase 6	AGPAT6			52.053	0.896862	1.2007	0.941489	0.990283	1.05311	0.962069	0.92763	1.12771	0.938919	1.18964	0.0482511	1.20134	0.0268704	0.990254	0.772853
B8Y648	Ubiquitin-conjugating enzyme E2L 3	UBE2L3			17.861	0.924433	1.15036	0.941559	0.922622	1.11687	0.977027	0.920911	1.14706	0.920133	1.20276	0.00132227	1.2335	0.00225898	0.975076	0.290847
B9V4F0	ADP-ribosylation factor 5	ARF5			20.529	1.0073	0.898801	1.093	1.34319	0.735171	0.944771	0.978822	0.78576	1.22244	0.7422	0.0517851	0.726797	0.107181	1.02119	0.879856
C0SW08	Cell division cycle 2	CDC2			34.079	0.82298	1.46146	0.721221	0.846345	1.50785	0.645806	0.835336	1.45364	0.752822	2.08645	0.000201585	1.76589	0.000141028	1.18153	0.050663
C1PIG4	cAMP-dependent protein kinase regulatory subunit type II alpha	PRKAR2A			45.124	1.00635	0.867093	1.08737	1.01567	0.871276	1.14952	1.0543	0.818883	1.10773	0.764586	0.000471411	0.831268	0.00160472	0.919783	0.0205543
C3RZ98	Protein arginine N-methyltransferase 5	PRMT5			72.613	1.11659	0.761397	1.11266	1.13384	0.709626	1.1098	1.1366	0.857929	1.01098	0.720271	0.00640689	0.687609	0.0134375	1.0475	0.263252
C3S7K5	Protein S100	S100A8			10.416	1.31053	0.526105	1.14967	1.14395	0.566187	1.2468	2.49258	0.272598	0.362154	0.494773	0.233845	0.275899	0.100492	1.79331	0.235224
C3S7K6	Calcium-binding protein A9	S100A9			15.892							2.49048	0.245303	0.391236	0.626995		0.0984962		6.36568
C3UP60	MAL2 proteolipid protein	MAL2			19.048	0.872631	1.25418	0.883889	0.817529	1.41157	0.804215	0.886043	1.24921	0.855928	1.53888	0.00590825	1.51966	0.00714848	1.01265	0.74987
C4MXZ1	ADP-ribosylation factor 1	ARF1			20.697	1.19469	0.655883	1.162	1.13721	0.688414	1.1166	1.11266	0.719633	1.15714	0.600723	6.12241e-05	0.599187	0.000177281	1.00256	0.923285
C5H0C6	Ubiquitin thioesterase	OTUB1			31.284	1.17281	0.670107	1.0957	1.14122	0.65845	1.15612	1.11113	0.780097	1.09416	0.630204	0.0024371	0.615637	0.00259161	1.02366	0.385878
C5HGF3	Calcium load-activated calcium channel	TMCO1			21.175	0.795514	1.37572	0.856463	0.883378	1.27778	0.891298	0.961645	1.08178	0.953593	1.38275	0.0462179	1.4146	0.0321472	0.977486	0.738587
C5I4T6	Phosphoenolpyruvate carboxykinase 2	PCK2			70.69	0.987561	1.11608	0.932388	1.02851	1.05795	0.918911	1.05023	1.01445	0.917994	1.15137	0.0387647	1.03984	0.317177	1.10725	0.0267727
C7EMF3	Kruppel-like factor 13	KLF13			31.342	1.05181	0.824307	1.11338							0.740365		0.7837		0.944704
C9E1C9	CDK9	CDK9			42.761	1.03443	0.956027	1.04137	1.09528	0.96382	0.962739	1.08797	0.895192	1.00869	0.93436	0.104495	0.874869	0.0101264	1.068	0.0856567
D0G0B3	Acetyl-Coenzyme A acyltransferase 2	ACAA2			41.93	0.881512	1.18309	0.937123	0.84163	1.13468	1.01727	0.865937	1.1894	0.933805	1.21431	0.00535493	1.3546	0.000286447	0.896436	0.0509854
D0G0C6	Asparagine synthetase	ASNS			64.373	1.27551	0.788888	0.936726	1.19144	0.816644	0.972405	1.02302	1.02753	0.933446	0.926295	0.452692	0.754466	0.0540787	1.22775	0.0968853
D0G6R6	CDP-diacylglycerol--inositol 3-phosphatidyltransferase	CDIPT			23.601	0.939293	1.12769	0.938676				0.988596	0.981825	0.971952	1.10409	0.394833	1.09421	0.418371	1.00903	0.802317
D0G6S1	Dynactin 6	DCTN6			20.681	1.00601	1.09183	0.910484	1.05698	0.972229	0.972292	1.03178	0.991088	0.979872	1.06725	0.226883	0.987197	0.765566	1.08109	0.0507792
D0G6X4	Farnesyl diphosphate synthase	FDPS			48.599	1.17079	0.700018	1.12265	1.15373	0.565976	1.25074	1.11134	0.78394	1.1624	0.579768	0.00517809	0.59663	0.0132956	0.971737	0.486641
D0G6Y3	Estradiol 17-beta-dehydrogenase 8	HSD17B8			26.574	0.878927	1.06927	1.04732	1.03888	0.956032	1.00316	0.822423	1.07774	1.08464	0.989767	0.829083	1.1324	0.200677	0.87404	0.16963
D0G777	S-adenosylmethionine synthase	MATA2			43.69	1.17796	0.793501	1.06564	1.15078	0.714918	1.11311	1.14259	0.869946	0.991356	0.750247	0.0111265	0.685145	0.011312	1.09502	0.0947426
D0G7F3	SH3-domain GRB2-like endophilin B1	SH3GLB1			40.683	1.06204	0.864008	1.06174	1.03323	0.843779	1.08913	1.05895	0.90028	1.03	0.819921	0.00131032	0.82685	0.00201731	0.99162	0.67718
D0G7F6	Triosephosphate isomerase	TPI1			26.667	0.64356	1.72938	0.632833	0.622391	1.72096	0.722584	0.556154	1.89601	0.523053	2.84612	0.000140869	2.93416	0.000485403	0.969994	0.787644
D0VWV4	Succinate dehydrogenase cytochrome b560 subunit, mitochondrial	SDHC			18.518	0.891736	1.13784	0.972871	0.817703	1.16387	1.02248	0.927199	1.05705	1.00964	1.11772	0.0490872	1.27388	0.00615116	0.877417	0.0449645
D1H0P7	Beta1,4-galactosyltransferase 7	b4GalT7			37.395	0.973329	0.981582	1.04124	0.976041	1.20615	0.840161	0.996533	1.03799	0.96535	1.13312	0.231693	1.09498	0.300329	1.03483	0.630663
D2KPI8	Adenylosuccinate lyase	ADSL			55.092	1.01586	1.17945	0.821302				1.00335	1.15534	0.826738	1.41671	0.0167214	1.15629	0.0188317	1.22522	0.00784073
D2KQR0	Microtubule-associated protein 1 light chain 3 alpha	MAP1LC3A			14.325	1.06122	0.756569	1.16676				1.01972	0.889155	1.09234	0.728489	0.0826	0.790856	0.163157	0.92114	0.205747
D2SW95	Coatomer subunit beta	COPB1			107.12	1.20457	0.676017	1.10324	1.09892	0.718911	1.12748	1.12416	0.745965	1.12555	0.63788	0.000824198	0.624595	0.0008046	1.02127	0.536365
D2WKD8	Sodium/potassium-transporting ATPase subunit alpha-2	ATP1A2			112.21	1.00822	0.974481	1.01583	0.984468	0.967103	1.04324	1.04215	0.872081	1.08886	0.893815	0.0563389	0.92712	0.141195	0.964077	0.240207
D2WL17	F-box protein 7	FBXO7			58.471	1.10145	0.803467	1.08706							0.739117		0.729464		1.01323
D3K5L7	Pachytene checkpoint protein 2 homolog	TRIP13			48.461	1.0633	0.978071	0.962191	0.969787	0.974561	1.01927	1.02144	1.00023	0.980799	0.996828	0.877621	0.966717	0.336678	1.03115	0.398611
D3K5N3	Midkine	MDK			15.597	1.32103	0.279544	1.32798	1.56855	0.375131	1.02244	1.53132	0.317646	1.19438	0.274295	0.00630638	0.219937	0.00188603	1.24715	0.0686694
D3K5N7	ELAV-like protein	ELAVL1			36.134	1.00997	0.946553	1.0156	1.03491	0.926129	1.0396	1.03431	0.876673	1.10059	0.871212	0.0155201	0.892882	0.0220049	0.97573	0.423016
D3Y264	Apolipoprotein C-II	APOC2			11.138	1.45685	0.342338	1.18403	1.21101	0.371479	1.36095	1.38245	0.362932	1.28514	0.281127	0.0024829	0.265844	0.0048583	1.05749	0.460864
D4P3C2	Uncharacterized protein	zap	Zinc finger CCCH-type antiviral protein 1 OS=Homo sapiens GN=ZC3HAV1 PE=1 SV=3	Zinc finger CCCH type, antiviral 1, isoform CRA_b OS=Mus musculus GN=Zc3hav1 PE=4 SV=1	99.472	0.905542	1.10731	0.955957	0.992761	1.06129	0.954281	0.973758	0.9881	0.987898	1.08922	0.120543	1.09911	0.100223	0.991003	0.783732
D7RA29	Microtubule-associated protein 1 light chain 3 beta	MAP1LC3B			14.704				1.0552	0.896965	1.04029				0.862222		0.850043		1.01433
D7RA31	Uncharacterized protein	WIPI2	WD repeat domain phosphoinositide-interacting protein 2 OS=Homo sapiens GN=WIPI2 PE=1 SV=1	WD repeat domain phosphoinositide-interacting protein 2 OS=Mus musculus GN=Wipi2 PE=1 SV=1	47.401	1.09042	0.779173	1.11938	1.16486	0.739939	1.07831	1.15998	0.741299	1.11153	0.683065	4.15024e-05	0.661857	0.000696243	1.03204	0.283198
D7RA36	Autophagy related 2-like protein B	ATG2B			232.12	0.617675	1.72089	0.68998	0.645318	1.63538	0.764602	0.628209	1.5938	0.748202	2.24718	0.000128692	2.61742	0.000868481	0.858551	0.0328162
D9U8D1	Dynein, light chain, LC8-type 1	LC8			10.366	0.942039	1.13375	0.954368	0.931121	1.13051	1.00586	0.941741	1.16612	0.906684	1.19654	0.0130376	1.21865	0.00144366	0.981857	0.607399
E0YLM4	Mesencephalic astrocyte-derived neurotrophic factor	MANF			20.359	0.457266	1.89175	0.660856	0.472764	1.96775	0.623658	0.543127	1.72586	0.660671	2.87138	0.00274225	3.79143	0.000960448	0.757335	0.0144049
E1CAJ5	Protein disulfide-isomerase	grp-58			56.858	0.752602	1.28346	0.981958	0.764979	1.15252	1.08031	0.780695	1.24749	0.964393	1.21701	0.0148239	1.60271	0.00542578	0.759345	0.0174481
E1CAJ6	Protein disulfide isomerase P5	pdi-p5			48.074	0.574903	1.53501	0.884599	0.6014	1.46423	0.941824	0.658864	1.44908	0.861166	1.65513	8.59439e-05	2.42393	1.85e-05	0.682831	0.00118664
E7CXS0	Low density lipoprotein receptor-related protein 8	ApoER2			105.01	0.321135	2.33167	0.405649	0.405999	2.12935	0.527536	0.50706	1.83684	0.61023	4.08048	0.00329205	5.10282	0.00324181	0.799651	0.2683
E7CXS1	Uncharacterized protein	Vldlr	Very low-density lipoprotein receptor OS=Homo sapiens GN=VLDLR PE=1 SV=1	Very low-density lipoprotein receptor OS=Mus musculus GN=Vldlr PE=2 SV=1	93.306	0.579483	1.85821	0.555706	0.644766	1.65896	0.744309				2.70549	0.0151006	2.87292	0.0368703	0.941719	0.759102
E7EBY5	MACRO domain containing protein 1	MACROD1			35.17	0.959729	1.04586	0.977483	1.03587	1.10577	0.843485	0.94762	0.98474	1.02385	1.10249	0.217291	1.06562	0.225456	1.03459	0.626859
F1CK17	Tyrosine-protein kinase receptor	IGF1R			154.95	0.911963	1.08294	0.966759	0.912382	1.06818	1.0604	0.974041	0.928821	1.11199	0.98114	0.776658	1.10061	0.18689	0.891448	0.0987243
F1REW5	Uncharacterized protein	CLIP1	CAP-Gly domain-containing linker protein 1 OS=Homo sapiens GN=CLIP1 PE=1 SV=2	CAP-Gly domain-containing linker protein 1 OS=Mus musculus GN=Clip1 PE=2 SV=1	136.8	0.853124	1.06659	1.07336				0.821389	1.33108	0.83343	1.25744	0.304076	1.43186	0.219021	0.878182	0.508709
F1REW6	Uncharacterized protein	ZCCHC8	Zinc finger CCHC domain-containing protein 8 OS=Homo sapiens GN=ZCCHC8 PE=1 SV=2	Zinc finger CCHC domain-containing protein 8 OS=Mus musculus GN=Zcchc8 PE=2 SV=3	78.575	0.933503	1.04195	0.975521	0.542791	1.86275	0.658012	0.925299	1.18362	0.885394	1.62304	0.164618	1.70234	0.143212	0.953419	0.819728
F1REW7	Uncharacterized protein	RSRC2	Arginine/serine-rich coiled-coil protein 2 OS=Homo sapiens GN=RSRC2 PE=1 SV=1	Arginine/serine-rich coiled-coil protein 2 OS=Mus musculus GN=Rsrc2 PE=4 SV=1	48.44	0.912566	1.25441	0.847162	0.914922	1.23998	0.866312	0.870993	1.26494	0.864513	1.45824	2.67191e-06	1.39313	0.000218956	1.04674	0.0900843
F1REW9	Density-regulated protein	DENR			22.603	0.976174	1.09717	0.932877	0.874765	1.32362	0.829339	0.882781	1.15776	0.941713	1.32347	0.0310406	1.30904	0.0355612	1.01102	0.848133
F1REX4	ATP synthase subunit f, mitochondrial	ATP5J2			10.184	0.951434	1.07882	0.972291	1.01302	1.1794	0.829872	1.00628	1.0264	0.967996	1.18571	0.0573726	1.10566	0.131046	1.0724	0.288627
F1REX9	Uncharacterized protein	ARPC1A	Actin-related protein 2/3 complex subunit 1A OS=Homo sapiens GN=ARPC1A PE=1 SV=2	Actin-related protein 2/3 complex subunit 1A OS=Mus musculus GN=Arpc1a PE=1 SV=1	41.551	1.11828	0.842376	1.00389	1.12051	0.806695	1.0615	1.00312	1.04973	0.991361	0.882899	0.252159	0.832473	0.123961	1.06057	0.254844
F1REY0	Uncharacterized protein	VPS37B	Vacuolar protein sorting-associated protein 37B OS=Homo sapiens GN=VPS37B PE=1 SV=1	Vacuolar protein sorting-associated protein 37B OS=Mus musculus GN=Vps37b PE=2 SV=1	31.435	1.00463	0.986739	1.0079	1.00556	0.927447	0.986671	0.965747	1.03726	1.00184	0.984992	0.685706	0.991771	0.829171	0.993165	0.672327
F1REZ3	Uncharacterized protein	XRCC4	DNA repair protein XRCC4 OS=Homo sapiens GN=XRCC4 PE=1 SV=2	DNA repair protein XRCC4 OS=Mus musculus GN=Xrcc4 PE=2 SV=1	28.463							1.14536	0.892432	0.97444	0.915841		0.779174		1.1754
F1RF09	Uncharacterized protein	MSH3	DNA mismatch repair protein Msh3 OS=Homo sapiens GN=MSH3 PE=1 SV=4	DNA mismatch repair protein Msh3 OS=Mus musculus GN=Msh3 PE=2 SV=1	127.19	1.0365	0.908957	1.06466	0.997738	1.06323	0.946318	1.06748	0.831231	1.10641	0.899282	0.284744	0.903828	0.279417	0.99497	0.926986
F1RF19	Uncharacterized protein	---	E3 ubiquitin-protein ligase AMFR OS=Homo sapiens GN=AMFR PE=1 SV=2	E3 ubiquitin-protein ligase AMFR OS=Mus musculus GN=Amfr PE=1 SV=2	32.927	0.873726	1.28415	0.855467	0.819486	1.45711	0.762259	0.85627	1.17074	0.948891	1.52419	0.0151389	1.53443	0.0283459	0.993324	0.927072
F1RF36	Uncharacterized protein	ADGRG1	G-protein coupled receptor 56 OS=Homo sapiens GN=GPR56 PE=1 SV=2	G-protein coupled receptor 56 OS=Mus musculus GN=Gpr56 PE=1 SV=1	72.557	0.384752	2.30328	0.37008	0.351849	2.39792	0.36099	0.30707	2.31852	0.319874	6.67944	9.28704e-06	6.72599	1.48231e-06	0.993079	0.934026
F1RF38	Uncharacterized protein	KATNB1	Katanin p80 WD40 repeat-containing subunit B1 OS=Homo sapiens GN=KATNB1 PE=1 SV=1	Katanin p80 WD40 repeat-containing subunit B1 OS=Mus musculus GN=Katnb1 PE=1 SV=1	57.483
F1RF47	Uncharacterized protein	JMY	Junction-mediating and -regulatory protein OS=Homo sapiens GN=JMY PE=1 SV=2	Junction-mediating and -regulatory protein OS=Mus musculus GN=Jmy PE=1 SV=1	73.897	1.1855	0.801002	1.01247	1.04038	0.760249	1.17443	1.3775	0.540952	1.11247	0.637153	0.0204281	0.583398	0.0179881	1.09214	0.42143
F1RF72	Uncharacterized protein	LOC100514237	Vacuolar protein sorting-associated protein 13D OS=Homo sapiens GN=VPS13D PE=1 SV=2	Protein Vps13d OS=Mus musculus GN=Vps13d PE=2 SV=1	216.45
F1RF76	Uncharacterized protein	MFN2	Mitofusin-2 OS=Homo sapiens GN=MFN2 PE=1 SV=3	Mitofusin-2 OS=Mus musculus GN=Mfn2 PE=1 SV=3	86.179	1.00654	0.990084	1.00309	0.912938	1.10627	0.987267	0.981372	0.990311	0.979958	1.03917	0.42238	1.06405	0.270572	0.976613	0.497736
F1RF77	Uncharacterized protein	PLOD1	Procollagen-lysine,2-oxoglutarate 5-dioxygenase 1 OS=Homo sapiens GN=PLOD1 PE=1 SV=2	Procollagen-lysine,2-oxoglutarate 5-dioxygenase 1 OS=Mus musculus GN=Plod1 PE=1 SV=1	87.913	0.813936	1.2899	0.871285	0.820735	1.28302	0.914348	0.835019	1.2077	0.898086	1.40873	0.00136814	1.53081	0.0023902	0.920249	0.015568
F1RF78	Uncharacterized protein	KIAA2013			69.31	1.0391	1.02355	0.952957	1.0205	0.986456	0.993162	1.07015	0.930401	0.965707	1.00982	0.770207	0.939503	0.130348	1.07484	0.0191555
F1RF82	Methylenetetrahydrofolate reductase	MTHFR			78.94	1.13533	0.698205	1.1524							0.605872		0.614979		0.985192
F1RFA5	Uncharacterized protein	PGP	Phosphoglycolate phosphatase OS=Homo sapiens GN=PGP PE=1 SV=1	Phosphoglycolate phosphatase OS=Mus musculus GN=Pgp PE=2 SV=1	31.959	0.87793	1.35081	0.861127	0.753882	1.37957	0.890732	0.805736	1.3909	0.788173	1.62253	0.00112532	1.69075	0.00190985	0.959652	0.509814
F1RFA8	Uncharacterized protein	MLST8	Target of rapamycin complex subunit LST8 OS=Homo sapiens GN=MLST8 PE=1 SV=1	Target of rapamycin complex subunit LST8 OS=Mus musculus GN=Mlst8 PE=1 SV=1	36.341	1.05863	0.81579	1.11494				1.23639	0.789755	0.993581	0.761457	0.137684	0.699577	0.154224	1.08845	0.487766
F1RFB2	Uncharacterized protein	TSC2	Tuberin OS=Homo sapiens GN=TSC2 PE=1 SV=2	Tuberin OS=Mus musculus GN=Tsc2 PE=1 SV=1	201.56	1.00497	0.880193	1.10508	1.05117	0.773996	1.13266	1.21077	0.652501	1.15356	0.680178	0.027159	0.706077	0.0243085	0.963321	0.5776
F1RFB4	Na(+)/H(+) exchange regulatory cofactor NHE-RF	SLC9A3R2			37.233	0.646446	0.505783	1.77547	0.895223	1.18925	0.929088				0.626733	0.455092	1.09948	0.861919	0.570026	0.388374
F1RFB8	2-aminoethanethiol (Cysteamine) dioxygenase	ADO			29.693	1.09372	0.797749	1.10359	1.1146	0.858825	1.12952	1.11472	0.799054	1.07857	0.741506	0.000536898	0.73897	0.00220105	1.00343	0.831644
F1RFB9	Sulfhydryl oxidase	GFER			23.367	0.738125	1.51328	0.769801							1.96581		2.05017		0.958851
F1RFC2	Uncharacterized protein	ARID5B	AT-rich interactive domain-containing protein 5B OS=Homo sapiens GN=ARID5B PE=1 SV=3	AT-rich interactive domain-containing protein 5B OS=Mus musculus GN=Arid5b PE=1 SV=3	104.06	1.0887	0.884866	1.02424	1.03637	0.87566	1.07633	1.05359	0.692525	1.25714	0.73057	0.0336922	0.771726	0.0537855	0.94667	0.488905
F1RFC5	Uncharacterized protein	---	Protein kinase C beta type OS=Homo sapiens GN=PRKCB PE=1 SV=4	Protein kinase C beta type OS=Mus musculus GN=Prkcb PE=1 SV=4	26.446	0.90129	1.0569	1.02232	0.934744	1.06867	0.963859	0.972393	0.990362	1.02085	1.03622	0.31061	1.10949	0.0337587	0.933956	0.0786193
F1RFD3	Splicing factor 3A subunit 1	SF3A1			88.771	0.903678	1.20023	0.861877				0.875108	1.24711	0.867994	1.41476	0.038446	1.37585	0.0129834	1.02828	0.327068
F1RFD4	Uncharacterized protein	USMG5	Up-regulated during skeletal muscle growth protein 5 OS=Homo sapiens GN=USMG5 PE=1 SV=1	Up-regulated during skeletal muscle growth protein 5 OS=Mus musculus GN=Usmg5 PE=1 SV=1	6.4255	0.956225	1.05199	0.992457	0.951587	1.14086	0.919464	1.03599	1.07853	0.917292	1.15629	0.015204	1.11128	0.0453959	1.0405	0.359499
F1RFD6	Uncharacterized protein	TBC1D10A	TBC1 domain family member 10A OS=Homo sapiens GN=TBC1D10A PE=1 SV=1	TBC1 domain family member 10A OS=Mus musculus GN=Tbc1d10a PE=2 SV=1	52.198	1.08585	0.924495	0.99059	0.978416	1.06887	0.959036	1.05135	0.941596	1.01128	0.991241	0.870983	0.942017	0.345531	1.05225	0.242126
F1RFD8	Uncharacterized protein	RBBP6	E3 ubiquitin-protein ligase RBBP6 OS=Homo sapiens GN=RBBP6 PE=1 SV=1	E3 ubiquitin-protein ligase RBBP6 OS=Mus musculus GN=Rbbp6 PE=1 SV=5	193.07	1.02715	1.00166	0.950664	0.980918	1.1621	0.817046	1.10479	0.978459	0.925825	1.16658	0.109776	1.00943	0.89397	1.15568	0.0638526
F1RFE3	Uncharacterized protein	LCMT1	Leucine carboxyl methyltransferase 1 OS=Homo sapiens GN=LCMT1 PE=1 SV=2	Leucine carboxyl methyltransferase 1 OS=Mus musculus GN=Lcmt1 PE=2 SV=1	38.143	1.2692	0.533154	1.18101	1.2534	0.560168	1.15574	1.24303	0.615463	1.161	0.488539	0.000681266	0.453785	0.000498131	1.07659	0.0011788
F1RFF1	Uncharacterized protein	---	Activating signal cointegrator 1 complex subunit 2 OS=Homo sapiens GN=ASCC2 PE=1 SV=3	Activating signal cointegrator 1 complex subunit 2 OS=Mus musculus GN=Ascc2 PE=2 SV=1	82.129	0.546693	1.8138	0.669867	0.864395	1.45419	0.723695				2.34507	0.114264	2.31594	0.0622334	1.01258	0.965041
F1RFF5	Uncharacterized protein	NIPSNAP1	Protein NipSnap homolog 1 OS=Homo sapiens GN=NIPSNAP1 PE=1 SV=1	Protein NipSnap homolog 1 OS=Mus musculus GN=Nipsnap1 PE=1 SV=1	33.151	0.944846	0.976163	1.07224	1.05992	0.880893	1.05568	0.898308	1.04314	1.04985	0.912652	0.186085	0.999009	0.989302	0.913557	0.194847
F1RFG1	Uncharacterized protein	GTF3C1	General transcription factor 3C polypeptide 1 OS=Homo sapiens GN=GTF3C1 PE=1 SV=4	General transcription factor 3C polypeptide 1 OS=Mus musculus GN=Gtf3c1 PE=1 SV=2	238.81	1.07806	0.856618	1.07739	1.07726	0.898164	1.01845	1.04549	0.872645	1.08963	0.824819	0.00447874	0.820863	0.000317484	1.00482	0.848079
F1RFG5	Uncharacterized protein	XPO6	Exportin-6 OS=Homo sapiens GN=XPO6 PE=1 SV=1	Exportin-6 OS=Mus musculus GN=Xpo6 PE=2 SV=2	128.87				1.08289	0.853436	1.05331	1.07377	0.89147	0.992173	0.853052	0.0712067	0.809079	0.0472187	1.05435	0.314967
F1RFG6	Uncharacterized protein	NF2	Merlin OS=Homo sapiens GN=NF2 PE=1 SV=1	Merlin OS=Mus musculus GN=Nf2 PE=1 SV=2	69.851	0.804781	1.22086	0.976418	0.926478	1.10277	0.97672				1.18969	0.196425	1.34216	0.0731702	0.886399	0.319376
F1RFH5	Uncharacterized protein	SPNS1	Protein spinster homolog 1 OS=Homo sapiens GN=SPNS1 PE=1 SV=1	Protein spinster homolog 1 OS=Mus musculus GN=Spns1 PE=2 SV=1	56.606	0.845338	1.22824	0.932584	0.877759	1.06002	1.05905				1.14893	0.302881	1.32799	0.17344	0.865168	0.264785
F1RFH6	Uncharacterized protein	NFATC2IP	NFATC2-interacting protein OS=Homo sapiens GN=NFATC2IP PE=1 SV=1	NFATC2-interacting protein OS=Mus musculus GN=Nfatc2ip PE=1 SV=1	45.833	1.11467	0.930622	0.958627	1.044	0.776616	1.04172	1.02675	0.885748	1.12994	0.828353	0.0568212	0.814014	0.0296445	1.01761	0.764962
F1RFH8	Uncharacterized protein	RABEP2	Rab GTPase-binding effector protein 2 OS=Homo sapiens GN=RABEP2 PE=1 SV=2	Rab GTPase-binding effector protein 2 OS=Mus musculus GN=Rabep2 PE=2 SV=3	63.415	1.05327	0.895451	1.04859	1.14058	0.790645	1.05504	1.0659	0.945773	0.993843	0.849685	0.0601697	0.807384	0.0250659	1.05239	0.188674
F1RFI1	Elongation factor Tu	TUFM			49.451	0.797792	1.31586	0.892271	0.85019	1.30818	0.857951	0.860143	1.24172	0.898611	1.45942	0.000552305	1.54129	0.000151666	0.94688	0.12343
F1RFI2	AP complex subunit beta	AP1B1			104.59	1.04392	1.0407	0.922605	0.857576	1.17262	0.978244	0.959879	1.17375	0.862479	1.22572	0.0225875	1.18372	0.068069	1.03548	0.638435
F1RFI5	Uncharacterized protein	ZNF48	Zinc finger protein 48 OS=Homo sapiens GN=ZNF48 PE=1 SV=2	Zinc finger protein 48 OS=Mus musculus GN=Znf48 PE=1 SV=2	68.23	0.942304	1.02309	1.03163	0.9979	1.08008	0.931306	1.13526	0.839741	1.0361	0.981286	0.831246	0.956901	0.658876	1.02548	0.726315
F1RFI8	Uncharacterized protein	EWSR1	RNA-binding protein EWS OS=Homo sapiens GN=EWSR1 PE=1 SV=1	RNA-binding protein EWS OS=Mus musculus GN=Ewsr1 PE=2 SV=1	63.48	0.6973	1.52682	0.78432	0.766516	1.55674	0.72293	0.670644	1.63208	0.708983	2.12777	5.34286e-05	2.20928	3.7097e-05	0.963103	0.501291
F1RFJ6	Uncharacterized protein	ARL6IP4	ADP-ribosylation factor-like protein 6-interacting protein 4 OS=Homo sapiens GN=ARL6IP4 PE=1 SV=1	ADP-ribosylation factor-like protein 6-interacting protein 4 OS=Mus musculus GN=Arl6ip4 PE=1 SV=1	26.496	1.14628	0.776048	1.07117	1.16549	0.804272	1.02101	1.1897	0.834074	0.992063	0.782817	0.00208986	0.689538	0.000110523	1.13528	0.0122647
F1RFK3	Uncharacterized protein	TRRAP	Transformation/transcription domain-associated protein OS=Homo sapiens GN=TRRAP PE=1 SV=3	Transformation/transcription domain-associated protein OS=Mus musculus GN=Trrap PE=2 SV=1	402.73	1.07067	0.864518	1.08174	1.11997	0.819431	1.05159	1.10178	0.801967	1.06425	0.777438	0.00180516	0.755041	0.000469324	1.02966	0.148717
F1RFL1	Uncharacterized protein	CDK2AP1	Cyclin-dependent kinase 2-associated protein 1 OS=Homo sapiens GN=CDK2AP1 PE=1 SV=1	Cyclin-dependent kinase 2-associated protein 1 OS=Mus musculus GN=Cdk2ap1 PE=1 SV=2	10.522	0.821922	1.38081	0.814389	0.92019	1.28461	0.822131				1.62871	0.0578887	1.53	0.0214968	1.06452	0.476396
F1RFL6	Uncharacterized protein	EIF2B1	Translation initiation factor eIF-2B subunit alpha OS=Homo sapiens GN=EIF2B1 PE=1 SV=1	Translation initiation factor eIF-2B subunit alpha OS=Mus musculus GN=Eif2b1 PE=2 SV=1	33.873	1.1323	0.804557	1.05786	1.08693	0.831849	1.06865	1.01912	1.02232	0.96034	0.861307	0.16114	0.821014	0.0880796	1.04908	0.348888
F1RFL8	Uncharacterized protein	TCTN2	Tectonic-2 OS=Homo sapiens GN=TCTN2 PE=2 SV=1	Tectonic-2 OS=Mus musculus GN=Tctn2 PE=1 SV=2	76.811				0.8568	0.894306	1.22438				0.730417		1.04377		0.699784
F1RFM7	Uncharacterized protein	AIMP2	Aminoacyl tRNA synthase complex-interacting multifunctional protein 2 OS=Homo sapiens GN=AIMP2 PE=1 SV=2	Aminoacyl tRNA synthase complex-interacting multifunctional protein 2 OS=Mus musculus GN=Aimp2 PE=1 SV=2	35.155	1.24802	0.553933	1.17991	1.17336	0.633836	1.13474	1.10823	0.734175	1.1991	0.546978	0.00477659	0.544521	0.0016091	1.00451	0.913638
F1RFM9	Uncharacterized protein	PMS2	Mismatch repair endonuclease PMS2 OS=Homo sapiens GN=PMS2 PE=1 SV=2	Mismatch repair endonuclease PMS2 OS=Mus musculus GN=Pms2 PE=2 SV=1	93.984	0.987573	1.04279	0.972211	1.08614	0.970699	0.946934	1.04945	0.99689	0.962837	1.04455	0.169874	0.963889	0.356153	1.08368	0.0996178
F1RFN3	Uncharacterized protein	NCOR2	Nuclear receptor corepressor 2 OS=Homo sapiens GN=NCOR2 PE=1 SV=2	Nuclear receptor corepressor 2 OS=Mus musculus GN=Ncor2 PE=2 SV=1	219.27	1.05613	0.980352	0.966659				0.732742	1.67343	0.573563	1.72299	0.326094	1.4835	0.414034	1.16144	0.675092
F1RFN6	Uncharacterized protein	DHX37	Probable ATP-dependent RNA helicase DHX37 OS=Homo sapiens GN=DHX37 PE=1 SV=1	DEAH (Asp-Glu-Ala-His) box polypeptide 37 OS=Mus musculus GN=Dhx37 PE=2 SV=1	128.95	1.03166	0.886634	1.07478				1.06701	0.840462	1.09765	0.795007	0.0312991	0.822946	0.0277393	0.96605	0.242474
F1RFN9	Fascin	FSCN1			54.64	1.24194	0.577066	1.14756	1.22173	0.598982	1.15052	1.19246	0.645259	1.17748	0.524033	0.000201924	0.498152	3.59209e-05	1.05195	0.0314498
F1RFP4	Uncharacterized protein	BRI3BP	BRI3-binding protein OS=Homo sapiens GN=BRI3BP PE=1 SV=1	BRI3-binding protein OS=Mus musculus GN=Bri3bp PE=2 SV=1	27.386							0.94731	1.1255	0.923165	1.21917		1.1881		1.02615
F1RFQ7	GTP-binding nuclear protein Ran	RAN			24.423	1.27618	0.500895	1.19632	1.19915	0.564475	1.20404	1.1955	0.667269	1.17162	0.485064	0.00476947	0.472001	0.00117208	1.02768	0.338495
F1RFQ9	Uncharacterized protein	SFSWAP	Splicing factor, suppressor of white-apricot homolog OS=Homo sapiens GN=SFSWAP PE=1 SV=3	Splicing factor, suppressor of white-apricot homolog OS=Mus musculus GN=Sfswap PE=1 SV=2	104.07	0.781713	1.31966	0.907111	0.91296	1.20695	0.897238	0.786621	1.40197	0.866597	1.47085	0.0144487	1.58328	0.00313646	0.928994	0.276174
F1RFR0	Uncharacterized protein	---	E1A-binding protein p400 OS=Homo sapiens GN=EP400 PE=1 SV=4	E1A-binding protein p400 OS=Mus musculus GN=Ep400 PE=1 SV=3	23.447
F1RFR1	Uncharacterized protein	ULK1	Serine/threonine-protein kinase ULK1 OS=Homo sapiens GN=ULK1 PE=1 SV=2	Serine/threonine-protein kinase ULK1 OS=Mus musculus GN=Ulk1 PE=1 SV=1	112.84	1.17507	0.683255	1.12974							0.604791		0.581458		1.04013
F1RFR2	tRNA pseudouridine synthase	PUS1			48.729	1.19577	0.765763	1.03532	1.19633	0.708348	1.07735	1.09694	0.803567	1.09699	0.709633	0.00140915	0.65281	0.000834216	1.08704	0.0871023
F1RFR4	Uncharacterized protein	NOC4L	Nucleolar complex protein 4 homolog OS=Homo sapiens GN=NOC4L PE=1 SV=1	Nucleolar complex protein 4 homolog OS=Mus musculus GN=Noc4l PE=2 SV=1	58.509
F1RFR7	Uncharacterized protein	C12H17orf49	Chromatin complexes subunit BAP18 OS=Homo sapiens GN=BAP18 PE=1 SV=1	Protein 0610010K14Rik OS=Mus musculus GN=0610010K14Rik PE=2 SV=2	19.914	1.0858	0.9016	1.01159	1.05776	0.935236	1.00847	1.08647	0.966397	1.0322	0.918411	0.0334912	0.867868	0.00682731	1.05824	0.00908244
F1RFS8	Uncharacterized protein	CSNK2A2	Casein kinase II subunit alpha' OS=Homo sapiens GN=CSNK2A2 PE=1 SV=1	Casein kinase II subunit alpha' OS=Mus musculus GN=Csnk2a2 PE=2 SV=1	37.222	1.06502	0.845603	1.08182	1.03744	0.835606	1.11068	1.10653	0.877608	1.02462	0.795376	0.00475707	0.797392	0.00170942	0.997471	0.937301
F1RFT0	Uncharacterized protein	GINS3	DNA replication complex GINS protein PSF3 OS=Homo sapiens GN=GINS3 PE=1 SV=1	DNA replication complex GINS protein PSF3 OS=Mus musculus GN=Gins3 PE=2 SV=1	24.492	1.30313	0.777627	0.926303				1.16777	0.911278	0.935235	0.907263	0.418678	0.68352	0.054406	1.32734	0.137832
F1RFT3	Uncharacterized protein	LOC100516108	Proline-, glutamic acid- and leucine-rich protein 1 OS=Homo sapiens GN=PELP1 PE=1 SV=2	Proline-, glutamic acid- and leucine-rich protein 1 OS=Mus musculus GN=Pelp1 PE=1 SV=2	60.052	1.06039	0.959701	0.981657	0.992278	1.08924	0.928383	0.985093	0.974883	0.96495	1.05177	0.351639	0.995411	0.927683	1.05662	0.142819
F1RFU8	Uncharacterized protein	FBXL8	F-box/LRR-repeat protein 8 OS=Homo sapiens GN=FBXL8 PE=1 SV=1	F-box/LRR-repeat protein 8 OS=Mus musculus GN=Fbxl8 PE=1 SV=1	41.661	1.20548	0.652834	1.12977							0.577849		0.541554		1.06702
F1RFV5	Proteasome subunit beta type	PSMB6			25.692	0.438917	2.10164	0.505044	0.561713	1.76695	0.6753	0.42477	2.09394	0.430629	3.70119	0.000828357	4.18305	0.00202297	0.884807	0.512861
F1RFW5	Uncharacterized protein	RAB13	Ras-related protein Rab-13 OS=Homo sapiens GN=RAB13 PE=1 SV=1	Ras-related protein Rab-13 OS=Mus musculus GN=Rab13 PE=1 SV=1	22.87	0.991206	1.06099	0.994996	1.02142	0.988181	0.916995	0.984362	0.966967	1.03764	1.02255	0.651748	1.00639	0.850163	1.01606	0.705596
F1RFW6	Uncharacterized protein	E2F4	Transcription factor E2F4 OS=Homo sapiens GN=E2F4 PE=1 SV=2	Transcription factor E2F4 OS=Mus musculus GN=E2f4 PE=2 SV=1	43.465	1.12848	0.644026	1.20824							0.53303		0.570705		0.933985
F1RFW8	Uncharacterized protein	ELMO3	Engulfment and cell motility protein 3 OS=Homo sapiens GN=ELMO3 PE=2 SV=3	Engulfment and cell motility protein 3 OS=Mus musculus GN=Elmo3 PE=1 SV=2	81.285	1.18741	0.793487	1.0176				1.26256	0.70883	1.05024	0.726515	0.0641716	0.613197	0.0145634	1.1848	0.0844858
F1RFW9	Uncharacterized protein	GATAD2B	Transcriptional repressor p66-beta OS=Homo sapiens GN=GATAD2B PE=1 SV=1	Transcriptional repressor p66-beta OS=Mus musculus GN=Gatad2b PE=1 SV=1	65.26	0.860242	1.16199	0.935072	1.01012	1.08528	0.927401	0.940702	1.10117	0.914264	1.20589	0.0107703	1.19116	0.0343214	1.01236	0.817249
F1RFX9	Uncharacterized protein	SLC25A11	Mitochondrial 2-oxoglutarate/malate carrier protein OS=Homo sapiens GN=SLC25A11 PE=1 SV=3	Mitochondrial 2-oxoglutarate/malate carrier protein OS=Mus musculus GN=Slc25a11 PE=1 SV=3	33.304	0.86532	1.23959	0.903924	0.824311	1.35523	0.865846	0.91035	1.13685	0.929624	1.38241	0.0244841	1.43527	0.0164737	0.963172	0.349736
F1RFY3	Sperm-associated antigen 7	SPAG7			26.076	0.785735	1.49324	0.744608	0.617944	1.78878	0.6544	0.775561	1.41584	0.790883	2.14525	0.0109304	2.15574	0.00790799	0.995136	0.960777
F1RFY6	Uncharacterized protein	KIF1C	Kinesin-like protein KIF1C OS=Homo sapiens GN=KIF1C PE=1 SV=3	Kinesin-like protein KIF1C OS=Mus musculus GN=Kif1c PE=2 SV=2	122.53							1.12653	0.877924	1.00606	0.87264		0.779315		1.11975
F1RFY9	Uncharacterized protein	TMEM26	Transmembrane protein 26 OS=Homo sapiens GN=TMEM26 PE=1 SV=1	Transmembrane protein 26 OS=Mus musculus GN=Tmem26 PE=2 SV=2	41.214
F1RG01	Uncharacterized protein	CRAMP1	Protein cramped-like OS=Homo sapiens GN=CRAMP1L PE=1 SV=3	Protein cramped-like OS=Mus musculus GN=Cramp1l PE=2 SV=3	132.14
F1RG09	Chloride channel protein	LOC100626534			88.818	0.99485	0.804004	1.18404	1.24833	0.785311	0.961842	1.16955	0.760678	1.08351	0.727689	0.0404615	0.688596	0.0387058	1.05677	0.569965
F1RG11	Uncharacterized protein	TELO2	Telomere length regulation protein TEL2 homolog OS=Homo sapiens GN=TELO2 PE=1 SV=2	Telomere length regulation protein TEL2 homolog OS=Mus musculus GN=Telo2 PE=1 SV=2	91.035				1.11429	1.08218	0.822846				1.31516		0.971184		1.35419
F1RG13	Uncharacterized protein	IFT140	Intraflagellar transport protein 140 homolog OS=Homo sapiens GN=IFT140 PE=1 SV=1	Protein Ift140 OS=Mus musculus GN=Ift140 PE=2 SV=1	162.1	0.95184	1.04154	1.00603	1.01742	1.04816	0.943575	0.986013	0.914486	1.09788	0.985795	0.828613	1.01655	0.755807	0.969744	0.577065
F1RG15	Uncharacterized protein	MAPK8IP3	C-Jun-amino-terminal kinase-interacting protein 3 OS=Homo sapiens GN=MAPK8IP3 PE=1 SV=3	C-Jun-amino-terminal kinase-interacting protein 3 OS=Mus musculus GN=Mapk8ip3 PE=1 SV=1	147.52	1.10409	0.66832	1.2083				1.18676	0.678912	1.14918	0.571469	0.0319761	0.588092	0.0521299	0.971735	0.585458
F1RG16	Uncharacterized protein	HNRNPF	Heterogeneous nuclear ribonucleoprotein F OS=Homo sapiens GN=HNRNPF PE=1 SV=3	Heterogeneous nuclear ribonucleoprotein F OS=Mus musculus GN=Hnrnpf PE=1 SV=3	45.669	1.11703	0.785853	1.09469	1.10263	0.812487	1.04914	1.09227	0.786595	1.11581	0.731655	0.00131504	0.720104	1.49446e-05	1.01604	0.476596
F1RG17	Nucleoside diphosphate kinase	NME3			19.148	0.81789	1.18848	1.01705	0.879094	1.13673	0.99018	0.917561	1.10792	0.993023	1.14428	0.0166098	1.31309	0.00219476	0.871443	0.0384486
F1RG19	Uncharacterized protein	MRPS34	28S ribosomal protein S34, mitochondrial OS=Homo sapiens GN=MRPS34 PE=1 SV=2	28S ribosomal protein S34, mitochondrial OS=Mus musculus GN=Mrps34 PE=2 SV=1	25.809	0.956913	1.11425	0.93486	0.886011	1.40498	0.747295	0.752941	1.19327	1.03305	1.3673	0.051174	1.43016	0.0294314	0.956048	0.720874
F1RG29	Cytosolic Fe-S cluster assembly factor NUBP2	NUBP2			29.431	1.0582	0.819426	1.11201	1.08989	0.904777	1.00163	1.12588	0.741292	1.14222	0.757249	0.0146993	0.75306	0.0177667	1.00556	0.906426
F1RG31	Uncharacterized protein (Fragment)	---	Hydroxyacylglutathione hydrolase, mitochondrial OS=Homo sapiens GN=HAGH PE=1 SV=2	Hydroxyacylglutathione hydrolase, mitochondrial (Fragment) OS=Mus musculus GN=Hagh PE=2 SV=1	6.8957	0.680611	1.36802	0.955304	0.875707	1.23488	0.906732				1.39788	0.0832371	1.67247	0.0591267	0.835815	0.350433
F1RG33	Uncharacterized protein	CHTF18	Chromosome transmission fidelity protein 18 homolog OS=Homo sapiens GN=CHTF18 PE=1 SV=1	Chromosome transmission fidelity protein 18 homolog OS=Mus musculus GN=Chtf18 PE=2 SV=2	107.37	0.993146	0.920504	1.05858	0.955705	1.20479	0.847168	0.990612	1.05033	0.930371	1.11971	0.336577	1.08034	0.439679	1.03644	0.634196
F1RG34	Lipase maturation factor	LMF1			37.969				0.894852	1.16178	0.953655				1.21824		1.29829		0.93834
F1RG35	Uncharacterized protein	STUB1	E3 ubiquitin-protein ligase CHIP OS=Homo sapiens GN=STUB1 PE=1 SV=2	STIP1 homology and U box-containing protein 1 OS=Mus musculus GN=Stub1 PE=1 SV=1	34.992	1.08547	0.915602	1.0298	1.11844	0.922807	0.988006	0.992541	0.984909	1.01429	0.931144	0.0666723	0.883265	0.0598838	1.05421	0.280705
F1RG36	Uncharacterized protein	RAB4A	Ras-related protein Rab-4A OS=Homo sapiens GN=RAB4A PE=1 SV=3	Ras-related protein Rab-4A OS=Mus musculus GN=Rab4a PE=1 SV=2	24.034	1.26645	0.781308	0.956466	1.09787	0.886178	1.01072	1.08981	0.859617	1.05778	0.835414	0.0183139	0.731617	0.0168743	1.14187	0.114555
F1RG37	Uncharacterized protein	WDR24	WD repeat-containing protein 24 OS=Homo sapiens GN=WDR24 PE=1 SV=1	WD repeat-containing protein 24 OS=Mus musculus GN=Wdr24 PE=2 SV=1	88.21	0.980019	0.927828	1.08431							0.855688		0.946745		0.903822
F1RG40	Uncharacterized protein	NUP133	Nuclear pore complex protein Nup133 OS=Homo sapiens GN=NUP133 PE=1 SV=2	Nuclear pore complex protein Nup133 OS=Mus musculus GN=Nup133 PE=1 SV=2	128.71	1.1417	0.763283	1.09864	1.12062	0.785336	1.09038	1.04198	0.854937	1.10592	0.729466	0.00730835	0.7274	0.00191931	1.00284	0.927923
F1RG42	Uncharacterized protein	TAF5L	TAF5-like RNA polymerase II p300/CBP-associated factor-associated factor 65 kDa subunit 5L OS=Homo sapiens GN=TAF5L PE=1 SV=1	TAF5-like RNA polymerase II p300/CBP-associated factor-associated factor 65 kDa subunit 5L OS=Mus musculus GN=Taf5l PE=2 SV=1	66.026							1.07471	0.73299	1.1976	0.61205		0.682037		0.897386
F1RG44	Polypeptide N-acetylgalactosaminyltransferase	GALNT2			62.056	0.956879	1.01739	1.01654	0.949694	1.05602	1.01274	0.970488	0.997423	1.05386	0.99601	0.859481	1.06735	0.0512345	0.933161	0.0202735
F1RG46	Uncharacterized protein	COG2	Conserved oligomeric Golgi complex subunit 2 OS=Homo sapiens GN=COG2 PE=1 SV=1	Conserved oligomeric Golgi complex subunit 2 OS=Mus musculus GN=Cog2 PE=2 SV=2	74.162							1.06731	0.77629	1.16125	0.668497		0.727329		0.919111
F1RG50	Uncharacterized protein	NARFL	Cytosolic Fe-S cluster assembly factor NARFL OS=Homo sapiens GN=NARFL PE=1 SV=1	Cytosolic Fe-S cluster assembly factor NARFL OS=Mus musculus GN=Narfl PE=2 SV=2	52.61	0.963578	1.07631	0.963477							1.11711		1.117		1.0001
F1RG59	Uncharacterized protein	TTC13	Tetratricopeptide repeat protein 13 OS=Homo sapiens GN=TTC13 PE=2 SV=3	Protein Ttc13 OS=Mus musculus GN=Ttc13 PE=2 SV=1	96.433				0.994778	1.08624	0.928732				1.1696		1.09195		1.07111
F1RG61	Uncharacterized protein	TBC1D10B	TBC1 domain family member 10B OS=Homo sapiens GN=TBC1D10B PE=1 SV=3	TBC1 domain family member 10B OS=Mus musculus GN=Tbc1d10b PE=1 SV=2	88.295	0.929261	1.04285	0.964326	1.01622	0.902213	1.08667	0.850256	1.37031	0.768052	1.17606	0.385062	1.18586	0.338877	0.991733	0.945398
F1RG62	Uncharacterized protein	DCTPP1	dCTP pyrophosphatase 1 OS=Homo sapiens GN=DCTPP1 PE=1 SV=1	dCTP pyrophosphatase 1 OS=Mus musculus GN=Dctpp1 PE=1 SV=1	18.498	0.656313	1.58224	0.733706	0.657034	1.57206	0.828798	0.719364	1.58267	0.67611	2.11602	0.00270906	2.33037	0.000393216	0.908022	0.261945
F1RG65	Uncharacterized protein	TTC28	Tetratricopeptide repeat protein 28 OS=Homo sapiens GN=TTC28 PE=1 SV=4	Tetratricopeptide repeat protein 28 OS=Mus musculus GN=Ttc28 PE=2 SV=3	237.37				0.996132	1.07647	0.935286				1.15095		1.08065		1.06506
F1RG66	Uncharacterized protein	PITPNB	Phosphatidylinositol transfer protein beta isoform OS=Homo sapiens GN=PITPNB PE=1 SV=2	Phosphatidylinositol transfer protein beta isoform OS=Mus musculus GN=Pitpnb PE=1 SV=2	31.565	0.961548	1.18762	0.863486	0.973138	1.09923	0.937099	0.854745	1.28891	0.842599	1.35283	0.0149508	1.2819	0.0213293	1.05533	0.365168
F1RG67	Uncharacterized protein	CD2BP2	CD2 antigen cytoplasmic tail-binding protein 2 OS=Homo sapiens GN=CD2BP2 PE=1 SV=1	CD2 antigen cytoplasmic tail-binding protein 2 OS=Mus musculus GN=Cd2bp2 PE=1 SV=1	37.762	0.918299	1.1683	0.920714	0.896237	1.27971	0.856873	0.939644	1.14028	0.915446	1.33243	0.00908002	1.30285	0.016404	1.02271	0.45253
F1RG69	Uncharacterized protein	TPST2	Protein-tyrosine sulfotransferase 2 OS=Homo sapiens GN=TPST2 PE=1 SV=1	Protein-tyrosine sulfotransferase 2 OS=Mus musculus GN=Tpst2 PE=1 SV=1	41.958							1.29817	0.862468	0.864835	0.997263		0.664373		1.50106
F1RG71	Tuftelin-interacting protein 11	TFIP11			96.329	1.11149	0.876541	1.00779	1.13994	0.737059	0.983924	1.07531	0.955252	0.975822	0.865653	0.170044	0.772182	0.0487513	1.12105	0.0108748
F1RG73	Uncharacterized protein	PRR14	Proline-rich protein 14 OS=Homo sapiens GN=PRR14 PE=1 SV=1	Proline-rich protein 14 OS=Mus musculus GN=Prr14 PE=2 SV=1	64.796	1.0637	0.779358	1.14319	1.07009	0.934762	0.993329	1.04623	0.799574	1.01559	0.797465	0.034554	0.790468	0.0424535	1.00885	0.861356
F1RG74	Uncharacterized protein	SRCAP	Helicase SRCAP OS=Homo sapiens GN=SRCAP PE=1 SV=3	Protein Srcap OS=Mus musculus GN=Srcap PE=2 SV=1	343.14	1.10097	0.813751	1.05394	0.981161	1.02958	0.969205	1.06687	0.915846	1.04011	0.900733	0.24102	0.876208	0.162779	1.02799	0.556523
F1RG75	Phosphorylase kinase gamma 2 testis variant	PHKG2			46.556				1.1466	0.702231	1.12829				0.622385		0.612444		1.01623
F1RG77	Uncharacterized protein	RNF40	E3 ubiquitin-protein ligase BRE1B OS=Homo sapiens GN=RNF40 PE=1 SV=4	E3 ubiquitin-protein ligase BRE1B OS=Mus musculus GN=Rnf40 PE=2 SV=2	113.5	1.07559	0.853545	1.05924	1.09194	0.795791	1.06655	1.07764	0.84629	1.01418	0.794794	0.00097228	0.769028	0.00310014	1.0335	0.156484
F1RG79	Uncharacterized protein	ZNF629	Zinc finger protein 629 OS=Homo sapiens GN=ZNF629 PE=1 SV=2	Zinc finger protein 629 OS=Mus musculus GN=Znf629 PE=2 SV=2	96.221	1.03077	0.87018	1.09065	1.04465	1.00643	0.953422	1.1291	0.835742	1.0457	0.87785	0.133461	0.846416	0.0671551	1.03714	0.495754
F1RG84	Uncharacterized protein	SETD1A	Histone-lysine N-methyltransferase SETD1A OS=Homo sapiens GN=SETD1A PE=1 SV=3	Protein Setd1a OS=Mus musculus GN=Setd1a PE=4 SV=1	168.33	1.18527	0.689969	1.13251	1.17328	0.72587	1.11188	1.11452	0.767625	1.1128	0.650385	0.00167677	0.628683	0.000164097	1.03452	0.213209
F1RG97	Uncharacterized protein	BCL7C	B-cell CLL/lymphoma 7 protein family member C OS=Homo sapiens GN=BCL7C PE=1 SV=3	B-cell CLL/lymphoma 7 protein family member C OS=Mus musculus GN=Bcl7c PE=1 SV=1	23.406	0.831359	1.23974	0.934838							1.32616		1.49122		0.889308
F1RGA7	Uncharacterized protein	SART3	Squamous cell carcinoma antigen recognized by T-cells 3 OS=Homo sapiens GN=SART3 PE=1 SV=1	Squamous cell carcinoma antigen recognized by T-cells 3 OS=Mus musculus GN=Sart3 PE=2 SV=1	109.29	1.14987	0.720184	1.11633	1.17759	0.690411	1.11589	1.15676	0.720169	1.11508	0.636564	0.000589038	0.611547	5.41069e-06	1.04091	0.031544
F1RGA8	Uncharacterized protein	FICD	Adenosine monophosphate-protein transferase FICD OS=Homo sapiens GN=FICD PE=1 SV=2	Adenosine monophosphate-protein transferase FICD OS=Mus musculus GN=Ficd PE=2 SV=1	51.817	0.836875	1.20219	0.96415							1.24689		1.43653		0.867993
F1RGA9	Coronin	---			58.929	1.05296	1.06224	0.86306	1.04268	0.97934	0.962981	0.952658	1.23116	0.807877	1.24254	0.0835135	1.07363	0.428485	1.15733	0.0746657
F1RGB0	Uncharacterized protein	SSH1	Protein phosphatase Slingshot homolog 1 OS=Homo sapiens GN=SSH1 PE=1 SV=2	Protein phosphatase Slingshot homolog 1 OS=Mus musculus GN=Ssh1 PE=1 SV=1	115.88	1.20057	0.833656	0.968814							0.860491		0.694386		1.23921
F1RGB8	Uncharacterized protein	KCTD10	BTB/POZ domain-containing adapter for CUL3-mediated RhoA degradation protein 3 OS=Homo sapiens GN=KCTD10 PE=1 SV=1	BTB/POZ domain-containing adapter for CUL3-mediated RhoA degradation protein 3 OS=Mus musculus GN=Kctd10 PE=2 SV=1	35.845	1.21882	0.632991	1.13572	1.18918	0.525047	1.24554				0.486314	0.0154928	0.480912	0.0410156	1.01123	0.849097
F1RGB9	Uncharacterized protein	UBE3B	Ubiquitin-protein ligase E3B OS=Homo sapiens GN=UBE3B PE=1 SV=3	Ubiquitin-protein ligase E3B OS=Mus musculus GN=Ube3b PE=2 SV=3	123.02
F1RGC0	60S ribosomal protein L27a	RPL27A			16.588	1.02733	1.07865	0.867356	1.03239	1.28258	0.721302	1.12155	0.937916	0.954539	1.29724	0.11508	1.03705	0.738252	1.25089	0.0712479
F1RGC1	Uncharacterized protein	ST5	Suppression of tumorigenicity 5 protein OS=Homo sapiens GN=ST5 PE=1 SV=3	Suppression of tumorigenicity 5 protein OS=Mus musculus GN=St5 PE=2 SV=1	125.28
F1RGC9	Uncharacterized protein	PSMD13	26S proteasome non-ATPase regulatory subunit 13 OS=Homo sapiens GN=PSMD13 PE=1 SV=2	26S proteasome non-ATPase regulatory subunit 13 OS=Mus musculus GN=Psmd13 PE=1 SV=1	42.867	1.24025	0.556738	1.17633	1.19232	0.588728	1.17845	1.15318	0.679262	1.17554	0.516873	0.00412205	0.508883	0.000388275	1.0157	0.539467
F1RGD0	Uncharacterized protein	RIC8A	Synembryn-A OS=Homo sapiens GN=RIC8A PE=1 SV=3	Synembryn-A OS=Mus musculus GN=Ric8a PE=1 SV=2	59.537	1.13724	0.680008	1.14511	1.01444	0.810771	1.05587	0.992999	0.905555	1.08353	0.729587	0.0317008	0.762027	0.0409911	0.957429	0.432626
F1RGD1	Uncharacterized protein	BET1L	BET1-like protein OS=Homo sapiens GN=BET1L PE=1 SV=1	BET1-like protein OS=Mus musculus GN=Bet1l PE=3 SV=1	12.39	0.965544	1.15937	0.885682	1.16772	0.988787	0.85625				1.23321	0.245092	1.00698	0.960349	1.22466	0.298445
F1RGD3	Uncharacterized protein	LOC100521779	Protocadherin beta-4 OS=Homo sapiens GN=PCDHB4 PE=2 SV=1	Protein Pcdhb7 OS=Mus musculus GN=Pcdhb7 PE=2 SV=1	85.945	0.990066	0.935299	1.06828							0.875516		0.944684		0.926782
F1RGD8	Uncharacterized protein	HARS2	Probable histidine--tRNA ligase, mitochondrial OS=Homo sapiens GN=HARS2 PE=1 SV=1	Probable histidine--tRNA ligase, mitochondrial OS=Mus musculus GN=Hars2 PE=2 SV=1	56.889	0.875837	1.23833	0.895457	0.952255	1.14611	0.914887				1.31713	0.089853	1.30434	0.0462267	1.0098	0.855719
F1RGD9	Uncharacterized protein	HARS	Histidine--tRNA ligase, cytoplasmic OS=Homo sapiens GN=HARS PE=1 SV=2	Histidine--tRNA ligase, cytoplasmic OS=Mus musculus GN=Hars PE=2 SV=2	57.303	0.863869	1.26609	0.868241	0.821334	1.33999	0.882895	0.769261	1.42425	0.755085	1.60813	0.00121002	1.64204	0.00152473	0.979348	0.743732
F1RGE2	Uncharacterized protein	IK	WD repeat-containing protein 55 OS=Homo sapiens GN=WDR55 PE=1 SV=2	WD repeat-containing protein 55 OS=Mus musculus GN=Wdr55 PE=2 SV=2	99.951				1.06192	0.953717	1.01218	0.966653	1.03612	0.994477	0.991619	0.872455	0.980905	0.788047	1.01092	0.856516
F1RGE3	NADH dehydrogenase [ubiquinone] 1 alpha subcomplex subunit 2	NDUFA2			11.082	0.788754	1.29963	0.919244	0.868183	1.22954	0.888686	0.902625	1.11557	0.97332	1.31047	0.0191255	1.42397	0.007725	0.920292	0.158393
F1RGE7	Uncharacterized protein	SRA1	Steroid receptor RNA activator 1 OS=Homo sapiens GN=SRA1 PE=1 SV=1	Steroid receptor RNA activator 1 OS=Mus musculus GN=Sra1 PE=1 SV=3	30.459	1.24348	0.630031	1.1149	1.14848	0.708715	1.12086	1.12054	0.804504	1.08641	0.645136	0.0131424	0.610179	0.00259569	1.05729	0.225238
F1RGE8	Uncharacterized protein	ANKHD1	Ankyrin repeat and KH domain-containing protein 1 OS=Homo sapiens GN=ANKHD1 PE=1 SV=1	Protein Ankhd1 OS=Mus musculus GN=Ankhd1 PE=4 SV=1	269.23	0.934766	1.15837	0.934535	0.971168	1.11269	0.929584	0.995403	0.988883	1.02	1.13031	0.115914	1.1236	0.130645	1.00597	0.876647
F1RGF6	Uncharacterized protein	CXXC5	CXXC-type zinc finger protein 5 OS=Homo sapiens GN=CXXC5 PE=2 SV=1	CXXC-type zinc finger protein 5 OS=Mus musculus GN=Cxxc5 PE=2 SV=1	32.962	1.11924	0.720352	1.14685	1.17605	0.721467	1.08435				0.646208	0.0502277	0.628165	0.0422411	1.02872	0.527815
F1RGG1	40S ribosomal protein S19	RPS19			16.06	0.584326	1.84663	0.598743	0.648568	1.9722	0.47916	0.765667	1.60581	0.649714	3.13996	0.00240628	2.71428	0.00273755	1.15683	0.285526
F1RGG2	Uncharacterized protein	ARHGEF1	Rho guanine nucleotide exchange factor 1 OS=Homo sapiens GN=ARHGEF1 PE=1 SV=2	Rho guanine nucleotide exchange factor 1 OS=Mus musculus GN=Arhgef1 PE=1 SV=2	105.03	1.18765	0.649117	1.16095	1.16039	0.755451	1.10733	1.14983	0.80542	1.08064	0.65991	0.00534884	0.631809	0.00832452	1.04448	0.158289
F1RGG8	Uncharacterized protein	MZB1	Marginal zone B- and B1-cell-specific protein OS=Homo sapiens GN=MZB1 PE=1 SV=1	Marginal zone B- and B1-cell-specific protein OS=Mus musculus GN=Mzb1 PE=1 SV=2	20.576	1.41101	0.350594	1.21839	1.13543	0.365503	1.43546	1.57563	0.609021	0.863941	0.376691	0.0304177	0.321469	0.00593909	1.17178	0.395686
F1RGH8	Uncharacterized protein	GSK3A	Glycogen synthase kinase-3 alpha OS=Homo sapiens GN=GSK3A PE=1 SV=2	Glycogen synthase kinase-3 alpha OS=Mus musculus GN=Gsk3a PE=2 SV=1	52.238	1.11038	0.819097	1.06459	1.09382	0.71783	1.16288	1.13793	0.834156	1.01701	0.730804	0.00715732	0.709451	0.00698901	1.0301	0.533154
F1RGI2	Uncharacterized protein	LOC100514845	Platelet-activating factor acetylhydrolase IB subunit gamma OS=Homo sapiens GN=PAFAH1B3 PE=1 SV=1	Platelet-activating factor acetylhydrolase IB subunit gamma OS=Mus musculus GN=Pafah1b3 PE=1 SV=1	26.042	1.26393	0.481608	1.22043	1.27118	0.421853	1.24896	1.17076	0.549815	1.27417	0.388207	0.000609759	0.392155	0.000119862	0.98993	0.750166
F1RGI7	Uncharacterized protein	MATR3	Matrin-3 OS=Homo sapiens GN=MATR3 PE=1 SV=2	Matrin-3 OS=Mus musculus GN=Matr3 PE=1 SV=1	94.732	0.993247	0.904477	1.05211	1.00498	0.944628	1.01795	0.999015	0.902772	1.06683	0.877263	0.00301767	0.918136	0.0216278	0.955482	0.0776429
F1RGI8	Uncharacterized protein	---	Nucleotide exchange factor SIL1 OS=Homo sapiens GN=SIL1 PE=1 SV=1	Nucleotide exchange factor SIL1 OS=Mus musculus GN=Sil1 PE=1 SV=2	18.63				0.862812	1.27039	0.887231				1.43186		1.47238		0.972477
F1RGJ2	Uncharacterized protein	CTNNA1	Catenin alpha-1 OS=Homo sapiens GN=CTNNA1 PE=1 SV=1	Catenin alpha-1 OS=Mus musculus GN=Ctnna1 PE=1 SV=1	100.1	0.946527	1.08666	0.938696	0.92428	1.21984	0.900093	0.975312	1.09777	0.935679	1.227	0.0308025	1.19611	0.0372284	1.02582	0.28512
F1RGJ3	Stress-70 protein, mitochondrial	HSPA9			73.65	0.829738	1.31191	0.883953	0.864425	1.27901	0.894426	0.85186	1.22509	0.923286	1.41246	0.00123573	1.49881	0.00117404	0.94239	0.0297569
F1RGK2	Uncharacterized protein	MEGF8	Multiple epidermal growth factor-like domains protein 8 OS=Homo sapiens GN=MEGF8 PE=1 SV=2	Multiple epidermal growth factor-like domains protein 8 OS=Mus musculus GN=Megf8 PE=2 SV=2	297.25	0.734737	1.50785	0.777873	0.738667	1.45212	0.840697	0.829459	1.31565	0.841427	1.73806	0.00427101	1.85665	0.00182663	0.936124	0.243239
F1RGK5	Tropomyosin alpha-3 chain	TPM3			28.94
F1RGK9	Uncharacterized protein	LOC100517710	Ubiquitin-associated protein 2-like OS=Homo sapiens GN=UBAP2L PE=1 SV=2	Ubiquitin-associated protein 2-like OS=Mus musculus GN=Ubap2l PE=1 SV=1	104.07	0.934521	1.1171	0.942711	0.919352	1.23767	0.904262	0.828965	1.29763	0.856898	1.3508	0.0144209	1.36139	0.0106825	0.992221	0.873884
F1RGL8	Uncharacterized protein	---	Rab GTPase-binding effector protein 1 OS=Homo sapiens GN=RABEP1 PE=1 SV=2	Rab GTPase-binding effector protein 1 OS=Mus musculus GN=Rabep1 PE=1 SV=2	39.463	1.18181	0.679201	1.10182	1.13175	0.626311	1.1919	1.09113	0.783589	1.13656	0.609019	0.00286089	0.613595	0.00303507	0.992542	0.829441
F1RGM3	Uncharacterized protein	TXNDC17	Thioredoxin domain-containing protein 17 OS=Homo sapiens GN=TXNDC17 PE=1 SV=1	Thioredoxin domain-containing protein 17 OS=Mus musculus GN=Txndc17 PE=1 SV=1	14.078	1.12669	0.581309	1.26725				1.12975	0.73605	1.14433	0.546263	0.0346996	0.583822	0.103855	0.935667	0.426456
F1RGM7	Uncharacterized protein	UBE2Q1	Ubiquitin-conjugating enzyme E2 Q1 OS=Homo sapiens GN=UBE2Q1 PE=1 SV=1	Ubiquitin-conjugating enzyme E2 Q1 OS=Mus musculus GN=Ube2q1 PE=2 SV=2	46.126
F1RGM8	Uncharacterized protein	ADAR	Double-stranded RNA-specific adenosine deaminase OS=Homo sapiens GN=ADAR PE=1 SV=4	Double-stranded RNA-specific adenosine deaminase OS=Mus musculus GN=Adar PE=1 SV=2	130.1	1.06095	0.81984	1.06006	1.00266	0.932847	1.05124	1.09194	0.809596	1.12852	0.790871	0.0129272	0.811993	0.0186993	0.973987	0.476655
F1RGP1	Uncharacterized protein	MYBBP1A	Myb-binding protein 1A OS=Homo sapiens GN=MYBBP1A PE=1 SV=2	Myb-binding protein 1A OS=Mus musculus GN=Mybbp1a PE=1 SV=2	151.77	1.06845	0.948335	0.968678	1.12432	0.94622	0.923355	1.07649	0.911838	1.00598	0.968384	0.33696	0.858418	0.00300233	1.1281	0.0166846
F1RGP4	Uncharacterized protein	PYGO2	Pygopus homolog 2 OS=Homo sapiens GN=PYGO2 PE=1 SV=2	Protein Pygo2 OS=Mus musculus GN=Pygo2 PE=2 SV=1	41.191	0.945212	1.03378	1.01919				0.804467	1.22651	0.952952	1.14611	0.358112	1.29183	0.177437	0.887199	0.33321
F1RGP5	Uncharacterized protein	SHC1	SHC-transforming protein 1 OS=Homo sapiens GN=SHC1 PE=1 SV=4	SHC-transforming protein 1 OS=Mus musculus GN=Shc1 PE=1 SV=3	51.676	1.08437	0.848627	1.06136	0.889134	1.15903	0.961316	1.04428	0.819828	1.13893	0.894321	0.425464	0.936941	0.642732	0.954511	0.57579
F1RGP6	Uncharacterized protein	FLAD1	FAD synthase OS=Homo sapiens GN=FLAD1 PE=1 SV=1	FAD synthase OS=Mus musculus GN=Flad1 PE=1 SV=1	61.341	0.886167	1.03229	1.07454	1.04822	0.968899	0.983259	1.06727	0.859209	1.10797	0.903541	0.1866	0.952942	0.572196	0.94816	0.476046
F1RGP8	Uncharacterized protein	---	Pre-B-cell leukemia transcription factor-interacting protein 1 OS=Homo sapiens GN=PBXIP1 PE=1 SV=1	Pre-B-cell leukemia transcription factor-interacting protein 1 OS=Mus musculus GN=Pbxip1 PE=1 SV=2	49.684	0.738948	1.43855	0.851274	0.705817	1.54737	0.806681	0.834155	1.25035	0.904277	1.65335	0.0159458	1.85889	0.00822327	0.889428	0.125194
F1RGQ5	Uncharacterized protein	UBE2G1	Ubiquitin-conjugating enzyme E2 G1 OS=Homo sapiens GN=UBE2G1 PE=1 SV=3	Ubiquitin-conjugating enzyme E2 G1 OS=Mus musculus GN=Ube2g1 PE=2 SV=3	19.452
F1RGQ6	Uncharacterized protein	ANKFY1	Ankyrin repeat and FYVE domain-containing protein 1 OS=Homo sapiens GN=ANKFY1 PE=1 SV=2	Ankyrin repeat and FYVE domain-containing protein 1 OS=Mus musculus GN=Ankfy1 PE=2 SV=2	120.71	1.18952	0.624121	1.15578	1.13346	0.681499	1.16308	1.14297	0.693315	1.15503	0.575416	0.00165677	0.576735	7.93292e-05	0.997713	0.893141
F1RGQ7	Uncharacterized protein	CYB5D2	Neuferricin OS=Homo sapiens GN=CYB5D2 PE=2 SV=1	Neuferricin OS=Mus musculus GN=Cyb5d2 PE=1 SV=1	29.04	0.62843	1.74342	0.659531	0.587244	1.8928	0.590795	0.550696	1.829	0.584823	2.97808	0.000113533	3.09404	0.00013432	0.962522	0.523752
F1RGR5	Sugar transporter SWEET	SLC50A1			24.894							1.12566	0.852062	1.0326	0.825166		0.756947		1.09012
F1RGR6	Uncharacterized protein	DPM3	Dolichol-phosphate mannosyltransferase subunit 3 OS=Homo sapiens GN=DPM3 PE=1 SV=2	Dolichol-phosphate mannosyltransferase subunit 3 OS=Mus musculus GN=Dpm3 PE=3 SV=1	10.316	0.783875	1.26264	0.957301	0.933762	1.20815	0.877126	1.02544	1.08246	0.894711	1.30197	0.0214405	1.29535	0.0414436	1.00511	0.954951
F1RGS0	Uncharacterized protein	THBS3	Thrombospondin-3 OS=Homo sapiens GN=THBS3 PE=2 SV=1	Thrombospondin-3 OS=Mus musculus GN=Thbs3 PE=1 SV=2	104.07				1.00181	0.996877	1.0011	0.92479	0.975672	1.09284	0.942029	0.404158	1.02385	0.657169	0.920082	0.300638
F1RGS3	Uncharacterized protein	NCBP3			70.187	1.05955	0.877576	1.04604	1.11205	0.790835	1.08181	1.07798	0.853289	1.07412	0.787545	0.0058418	0.776007	0.00291804	1.01487	0.451709
F1RGT0	Dihydroxyacetone phosphate acyltransferase	GNPAT			76.786	0.794744	1.40784	0.814513				0.797572	1.27728	0.908715	1.55819	0.0334409	1.6863	0.0755791	0.924031	0.396925
F1RGT2	Uncharacterized protein	EGLN1	Egl nine homolog 1 OS=Homo sapiens GN=EGLN1 PE=1 SV=1	Egl nine homolog 1 OS=Mus musculus GN=Egln1 PE=2 SV=2	45.695	1.30736	0.350576	1.32289	1.3301	0.335112	1.28936	1.24455	0.445195	1.35028	0.285394	0.000157284	0.291313	5.22978e-05	0.97968	0.442057
F1RGT4	Uncharacterized protein	MCRIP2	Protein FAM195A OS=Homo sapiens GN=FAM195A PE=1 SV=2	Protein FAM195A OS=Mus musculus GN=Fam195a PE=1 SV=1	17.466	0.366974	2.24614	0.438614	0.43417	2.1301	0.521754				4.55684	0.00281195	5.46249	0.00410302	0.834205	0.279988
F1RGT7	Uncharacterized protein	CAPN15	Calpain-15 OS=Homo sapiens GN=CAPN15 PE=1 SV=1	Calpain-15 OS=Mus musculus GN=Capn15 PE=1 SV=1	113.59	1.42891	0.277551	1.26886							0.218741		0.19424		1.12614
F1RGU1	Uncharacterized protein	TSNAX	Translin-associated protein X OS=Homo sapiens GN=TSNAX PE=1 SV=1	Translin-associated protein X OS=Mus musculus GN=Tsnax PE=1 SV=1	32.932	1.31879	0.548317	1.13521	1.13429	0.744864	1.10197	1.04834	0.886437	1.04915	0.663237	0.0561426	0.622496	0.0269195	1.06545	0.468544
F1RGU8	Uncharacterized protein	NTPCR	Cancer-related nucleoside-triphosphatase OS=Homo sapiens GN=NTPCR PE=1 SV=1	Cancer-related nucleoside-triphosphatase homolog OS=Mus musculus GN=Ntpcr PE=2 SV=1	20.568	1.11695	0.771809	1.10874	1.05581	0.850417	1.0859	1.05917	0.84239	1.10289	0.747414	0.00517989	0.762585	0.00161371	0.980106	0.388649
F1RGV4	Uncharacterized protein	DECR2	Peroxisomal 2,4-dienoyl-CoA reductase OS=Homo sapiens GN=DECR2 PE=1 SV=1	Peroxisomal 2,4-dienoyl-CoA reductase OS=Mus musculus GN=Decr2 PE=1 SV=1	33.615
F1RGW2	Uncharacterized protein	MPG	DNA-3-methyladenine glycosylase OS=Homo sapiens GN=MPG PE=1 SV=3	DNA-3-methyladenine glycosylase OS=Mus musculus GN=Mpg PE=2 SV=3	32	0.976435	1.06295	0.963947	0.981429	1.1469	0.879041	0.979586	1.03737	0.981432	1.14969	0.0370447	1.10545	0.0888445	1.04002	0.355644
F1RGW3	Uncharacterized protein	COA6	Cytochrome c oxidase assembly factor 6 homolog OS=Homo sapiens GN=COA6 PE=1 SV=1	Cytochrome c oxidase assembly factor 6 homolog OS=Mus musculus GN=Coa6 PE=1 SV=1	15.165	0.492358	1.94188	0.602357	0.295378	2.48098	0.339478	0.466263	2.09813	0.393987	4.88164	0.00255931	5.20016	0.00370193	0.938747	0.801598
F1RGW9	Uncharacterized protein	ARID4B	AT-rich interactive domain-containing protein 4B OS=Homo sapiens GN=ARID4B PE=1 SV=2	AT-rich interactive domain-containing protein 4B OS=Mus musculus GN=Arid4b PE=1 SV=1	146.31	0.984386	0.988428	1.02487	1.15019	0.795485	1.02632	1.0675	0.826681	1.11092	0.825587	0.0730245	0.815281	0.0646205	1.01264	0.825143
F1RGX0	Uncharacterized protein	GGPS1	Geranylgeranyl pyrophosphate synthase OS=Homo sapiens GN=GGPS1 PE=1 SV=1	Geranylgeranyl pyrophosphate synthase OS=Mus musculus GN=Ggps1 PE=2 SV=1	34.9	1.17062	0.781431	1.04518	1.00934	0.773054	1.19157	1.05211	0.962098	0.990175	0.779871	0.0514232	0.778627	0.0410901	1.0016	0.983317
F1RGX2	Uncharacterized protein	FAM234A	Protein ITFG3 OS=Homo sapiens GN=ITFG3 PE=1 SV=1	Protein ITFG3 OS=Mus musculus GN=Itfg3 PE=1 SV=1	58.757	0.821982	1.0716	1.09725	0.904583	1.34304	0.784903	0.93044	1.20733	0.857105	1.32224	0.0766877	1.36318	0.0392532	0.969971	0.80504
F1RGX3	Uncharacterized protein	LUC7L	Putative RNA-binding protein Luc7-like 1 OS=Homo sapiens GN=LUC7L PE=1 SV=1	Putative RNA-binding protein Luc7-like 1 OS=Mus musculus GN=Luc7l PE=2 SV=2	43.696	0.724535	1.6573	0.681079	0.688448	1.61247	0.736006	0.656252	1.63595	0.68066	2.33857	5.92408e-06	2.37079	9.86322e-06	0.986409	0.742328
F1RGZ0	Galectin	LGALS8			36.186	0.923297	1.0617	1.01922	1.05128	0.910497	1.03195	0.948805	0.951924	1.09456	0.929552	0.241789	1.00025	0.996896	0.929316	0.194674
F1RH16	Uncharacterized protein	EMC10	ER membrane protein complex subunit 10 OS=Homo sapiens GN=EMC10 PE=1 SV=1	ER membrane protein complex subunit 10 OS=Mus musculus GN=Emc10 PE=2 SV=2	27.404	0.940488	1.10359	0.928022	0.889408	1.27223	0.861244	0.953402	1.12397	0.919121	1.29221	0.0258343	1.25743	0.0338338	1.02766	0.432634
F1RH32	DNA polymerase	POLD1			123.66	1.08556	0.975643	0.935479	1.10027	0.973723	0.936483	1.01372	1.03756	0.922588	1.06884	0.086367	0.933548	0.109265	1.14492	0.0340151
F1RH55	Uncharacterized protein	VRK3	Inactive serine/threonine-protein kinase VRK3 OS=Homo sapiens GN=VRK3 PE=1 SV=2	Inactive serine/threonine-protein kinase VRK3 OS=Mus musculus GN=Vrk3 PE=1 SV=2	53	1.15405	0.793718	1.04789	1.0685	1.01243	0.926287	0.886199	1.10693	0.997403	0.980313	0.858721	0.937058	0.621455	1.04616	0.636533
F1RH59	Uncharacterized protein	NUP62	Nuclear pore glycoprotein p62 OS=Homo sapiens GN=NUP62 PE=1 SV=3	Nuclear pore glycoprotein p62 OS=Mus musculus GN=Nup62 PE=1 SV=2	54.093	1.11966	0.79952	1.08062	1.11024	0.755717	1.13689	1.12889	0.840723	1.04093	0.735309	0.00159426	0.71334	0.00423679	1.0308	0.352202
F1RH75	Uncharacterized protein	KDM3B	Lysine-specific demethylase 3B OS=Homo sapiens GN=KDM3B PE=1 SV=2	Jumonji domain containing 1B OS=Mus musculus GN=Kdm3b PE=2 SV=1	191.71	1.09357	0.84535	1.03355	1.12781	0.876107	1.00162	1.04681	0.911757	1.06122	0.850414	0.00405644	0.80571	0.00255476	1.05548	0.12694
F1RH79	Uncharacterized protein	BRD8	Bromodomain-containing protein 8 OS=Homo sapiens GN=BRD8 PE=1 SV=2	Bromodomain-containing protein 8 OS=Mus musculus GN=Brd8 PE=2 SV=2	103.22	0.664332	1.64123	0.720202	0.83964	1.26225	0.915631	0.837053	1.17974	0.969774	1.56709	0.053814	1.74421	0.0400584	0.898457	0.411085
F1RH83	Uncharacterized protein	CCDC97	Coiled-coil domain-containing protein 97 OS=Homo sapiens GN=CCDC97 PE=1 SV=1	Coiled-coil domain-containing protein 97 OS=Mus musculus GN=Ccdc97 PE=1 SV=1	38.098	0.907265	1.25325	0.853074	1.10486	0.812441	1.06576	0.910219	1.02497	1.02933	1.04833	0.762018	1.05759	0.721298	0.991244	0.930482
F1RH86	Uncharacterized protein	B9D2	B9 domain-containing protein 2 OS=Homo sapiens GN=B9D2 PE=1 SV=2	B9 domain-containing protein 2 OS=Mus musculus GN=B9d2 PE=1 SV=2	19.282
F1RH90	Kinesin-like protein	KIF20A			100.26	1.00583	1.22594	0.763347	0.93308	1.2623	0.829994	0.973268	1.26207	0.859516	1.52896	0.00134739	1.28781	0.00105075	1.18726	0.0147867
F1RH91	Uncharacterized protein	CDC23	Cell division cycle protein 23 homolog OS=Homo sapiens GN=CDC23 PE=1 SV=3	Cell division cycle protein 23 homolog OS=Mus musculus GN=Cdc23 PE=1 SV=2	68.566	1.04767	0.829395	1.09321	1.23771	0.762215	0.991939				0.763309	0.0700296	0.69643	0.139637	1.09603	0.475557
F1RH94	Uncharacterized protein	HNRNPA0	Heterogeneous nuclear ribonucleoprotein A0 OS=Homo sapiens GN=HNRNPA0 PE=1 SV=1	Heterogeneous nuclear ribonucleoprotein A0 OS=Mus musculus GN=Hnrnpa0 PE=1 SV=1	31.907	0.87157	1.31843	0.906915	0.928915	1.3748	0.717469	0.915931	1.26208	0.833058	1.60952	0.0033075	1.45608	0.00140802	1.10538	0.253864
F1RHA0	Uncharacterized protein	---	2-oxoisovalerate dehydrogenase subunit alpha, mitochondrial OS=Homo sapiens GN=BCKDHA PE=1 SV=2	2-oxoisovalerate dehydrogenase subunit alpha, mitochondrial OS=Mus musculus GN=Bckdha PE=2 SV=1	47.019	0.770899	1.24128	1.01318	0.874304	1.26422	0.896223	0.845641	1.18824	0.953481	1.29021	0.00392442	1.48293	0.000727725	0.870046	0.0538713
F1RHA5	Kinase	ITPKC			74.437
F1RHB4	Uncharacterized protein	CXCL14	C-X-C motif chemokine 14 OS=Homo sapiens GN=CXCL14 PE=1 SV=2	C-X-C motif chemokine 14 OS=Mus musculus GN=Cxcl14 PE=2 SV=2	11.744	2.11682	0.142158	0.763741				2.13381	0.141719	0.819769	0.179271	0.0274187	0.0667847	0.00270793	2.68431	0.00729111
F1RHC6	Uncharacterized protein	CAMLG	Calcium signal-modulating cyclophilin ligand OS=Homo sapiens GN=CAMLG PE=1 SV=1	Calcium signal-modulating cyclophilin ligand OS=Mus musculus GN=Camlg PE=1 SV=2	23.332	0.899758	1.23116	0.880145	0.790735	1.17305	1.03909	0.501597	1.97314	0.486154	1.81981	0.109966	1.99689	0.0881084	0.911324	0.745213
F1RHC7	Uncharacterized protein	SEC24A	Protein transport protein Sec24A OS=Homo sapiens GN=SEC24A PE=1 SV=2	Protein transport protein Sec24A OS=Mus musculus GN=Sec24a PE=1 SV=1	125.13	1.0011	0.973044	1.02366	0.995898	0.972739	1.0278	0.914628	1.23392	0.84507	1.09776	0.428592	1.09207	0.415945	1.00521	0.944635
F1RHE3	Uncharacterized protein	EMC6	ER membrane protein complex subunit 6 OS=Homo sapiens GN=EMC6 PE=1 SV=1	ER membrane protein complex subunit 6 OS=Mus musculus GN=Emc6 PE=2 SV=1	12.059	0.919723	1.06325	1.01553	0.919379	1.12225	0.966042	1.08859	0.931316	0.987537	1.04975	0.477986	1.0646	0.473477	0.986048	0.832106
F1RHE6	Uncharacterized protein	KCTD12	BTB/POZ domain-containing protein KCTD12 OS=Homo sapiens GN=KCTD12 PE=1 SV=1	BTB/POZ domain-containing protein KCTD12 OS=Mus musculus GN=Kctd12 PE=1 SV=1	35.838	1.18097	0.713081	1.09705	1.11252	0.603013	1.24701				0.561459	0.0376243	0.573839	0.0275216	0.978426	0.798391
F1RHF0	Ubiquitin carboxyl-terminal hydrolase	UCHL3			24.069	0.951007	1.12068	0.934373							1.1994		1.17842		1.0178
F1RHF1	Uncharacterized protein	LOC100523015	TBC1 domain family member 4 OS=Homo sapiens GN=TBC1D4 PE=1 SV=2	TBC1 domain family member 4 (Fragment) OS=Mus musculus GN=Tbc1d4 PE=4 SV=1	45.5	1.10615	0.70366	1.0718	1.04998	0.868192	1.05916	1.04405	0.919324	1.05317	0.782371	0.0699891	0.77845	0.0576977	1.00504	0.816042
F1RHF2	Uncharacterized protein	TBC1D4	TBC1 domain family member 4 OS=Homo sapiens GN=TBC1D4 PE=1 SV=2	TBC1 domain family member 4 OS=Mus musculus GN=Tbc1d4 PE=2 SV=1	69.593	1.08544	0.861731	1.02361	1.0313	0.941498	1.04876	1.06238	0.898217	1.04441	0.866743	0.0182618	0.849746	0.00677061	1.02	0.322527
F1RHF7	Uncharacterized protein	DIS3	Exosome complex exonuclease RRP44 OS=Homo sapiens GN=DIS3 PE=1 SV=2	Exosome complex exonuclease RRP44 OS=Mus musculus GN=Dis3 PE=2 SV=4	85.754	1.22724	0.638709	1.14695	1.15092	0.673231	1.13172	1.14994	0.731567	1.12813	0.59983	0.00251805	0.57921	0.000189851	1.0356	0.252173
F1RHG1	Clustered mitochondria protein homolog	CLUH			141.57	1.08982	0.812325	1.07011	1.03604	0.863253	1.08757	1.04807	0.918754	1.03452	0.81271	0.0106028	0.817388	0.0110933	0.994277	0.800623
F1RHG3	Methyltransferase-like protein	---			64.458	1.07922	0.812715	1.09892	1.15068	0.796631	1.05125	1.15762	0.708304	1.14652	0.703022	0.00172765	0.684172	0.00126684	1.02755	0.461787
F1RHH0	Uncharacterized protein	SMG6	Telomerase-binding protein EST1A OS=Homo sapiens GN=SMG6 PE=1 SV=2	Telomerase-binding protein EST1A OS=Mus musculus GN=Smg6 PE=1 SV=1	53.312	0.975129	0.95962	1.05969							0.905569		0.984096		0.920204
F1RHH2	Uncharacterized protein	LOC100625845	Diphthamide biosynthesis protein 1 OS=Homo sapiens GN=DPH1 PE=1 SV=2	Diphthamide biosynthesis protein 1 OS=Mus musculus GN=Dph1 PE=1 SV=1	48.718				1.08898	0.886315	1.01875				0.870005		0.813898		1.06894
F1RHH4	Uncharacterized protein	RPA1	Replication protein A 70 kDa DNA-binding subunit OS=Homo sapiens GN=RPA1 PE=1 SV=2	Replication protein A 70 kDa DNA-binding subunit OS=Mus musculus GN=Rpa1 PE=2 SV=1	68.144	0.989669	1.06299	0.941176	1.06117	0.938939	1.00809	0.93904	1.09252	0.930586	1.07452	0.269668	1.03497	0.588099	1.03821	0.446987
F1RHH8	Uncharacterized protein	PRPF8	Pre-mRNA-processing-splicing factor 8 OS=Homo sapiens GN=PRPF8 PE=1 SV=2	Pre-mRNA-processing-splicing factor 8 OS=Mus musculus GN=Prpf8 PE=1 SV=2	262.25	1.06924	0.907715	1.01803	1.06318	0.916453	1.02642	1.04954	0.890822	1.03679	0.881136	0.00033633	0.853247	0.000123263	1.03269	0.0136532
F1RHI3	Uncharacterized protein	VPS53	Vacuolar protein sorting-associated protein 53 homolog OS=Homo sapiens GN=VPS53 PE=1 SV=1	Vacuolar protein sorting-associated protein 53 homolog OS=Mus musculus GN=Vps53 PE=2 SV=1	94.432	1.11834	0.725666	1.14281	1.14752	0.771074	1.06674	1.08093	0.784358	1.1408	0.680853	0.000549239	0.68158	0.000178718	0.998934	0.971859
F1RHI8	Uncharacterized protein	CRABP2	Cellular retinoic acid-binding protein 2 OS=Homo sapiens GN=CRABP2 PE=1 SV=2	Cellular retinoic acid-binding protein 2 OS=Mus musculus GN=Crabp2 PE=2 SV=2	15.721				1.47157	0.21668	1.25879	1.58295	0.216679	1.19905	0.176318	0.0187806	0.141874	0.0270352	1.24277	0.0685157
F1RHI9	Uncharacterized protein	ISG20L2	Interferon-stimulated 20 kDa exonuclease-like 2 OS=Homo sapiens GN=ISG20L2 PE=1 SV=1	Interferon-stimulated 20 kDa exonuclease-like 2 OS=Mus musculus GN=Isg20l2 PE=2 SV=2	37.909	1.19555	0.647623	1.14362	1.11596	0.775564	1.0123	1.0751	0.779805	1.14855	0.666672	0.00413805	0.650501	0.00247373	1.02486	0.656916
F1RHJ2	Uncharacterized protein	HDGF	Hepatoma-derived growth factor OS=Homo sapiens GN=HDGF PE=1 SV=1	Hepatoma-derived growth factor OS=Mus musculus GN=Hdgf PE=1 SV=2	27.104	0.713627	1.49367	0.829623	0.757304	1.40631	0.848699	0.69765	1.60237	0.686785	1.90365	0.000771992	2.07617	0.00278402	0.916906	0.328711
F1RHJ3	Uncharacterized protein	PRCC	Proline-rich protein PRCC OS=Homo sapiens GN=PRCC PE=1 SV=1	Papillary renal cell carcinoma (Translocation-associated) OS=Mus musculus GN=Prcc PE=2 SV=1	52.352
F1RHJ9	Uncharacterized protein	GLOD4	Glyoxalase domain-containing protein 4 OS=Homo sapiens GN=GLOD4 PE=1 SV=1	Glyoxalase domain-containing protein 4 OS=Mus musculus GN=Glod4 PE=2 SV=1	54.082	0.992859	0.977053	1.03892	1.02558	0.848785	1.08263	0.900023	1.14926	0.959821	0.96551	0.734733	1.01941	0.856115	0.947129	0.35554
F1RHK2	Uncharacterized protein	ABR	Active breakpoint cluster region-related protein OS=Homo sapiens GN=ABR PE=2 SV=2	Active breakpoint cluster region-related protein OS=Mus musculus GN=Abr PE=2 SV=1	78.181	1.14183	0.758218	1.09154				1.24616	0.773629	1.00072	0.732149	0.0945308	0.64148	0.0718266	1.14134	0.168367
F1RHK3	Uncharacterized protein	TIMM22	Mitochondrial import inner membrane translocase subunit Tim22 OS=Homo sapiens GN=TIMM22 PE=1 SV=2	Mitochondrial import inner membrane translocase subunit Tim22 OS=Mus musculus GN=Timm22 PE=2 SV=1	20.662	1.13252	0.88143	0.987317	0.909288	1.23344	0.877239				1.13425	0.604798	1.03578	0.879537	1.09507	0.572817
F1RHK9	Uncharacterized protein	ARHGEF11	Rho guanine nucleotide exchange factor 11 OS=Homo sapiens GN=ARHGEF11 PE=1 SV=1	Protein Arhgef11 OS=Mus musculus GN=Arhgef11 PE=1 SV=1	164.5	0.778986	1.34618	0.88315	0.887149	1.1143	0.97839	0.943616	1.04847	0.95491	1.24588	0.11414	1.34456	0.0597178	0.92661	0.301193
F1RHL7	Uncharacterized protein	HEATR1	HEAT repeat-containing protein 1 OS=Homo sapiens GN=HEATR1 PE=1 SV=3	HEAT repeat containing 1 OS=Mus musculus GN=Heatr1 PE=4 SV=1	243.3	1.12847	0.890846	0.982411	0.992273	0.994111	1.03805	1.02459	0.994913	0.981797	0.959234	0.373546	0.915602	0.176732	1.04765	0.373324
F1RHL9	Uncharacterized protein	ACTN2	Alpha-actinin-2 OS=Homo sapiens GN=ACTN2 PE=1 SV=1	Alpha-actinin-2 OS=Mus musculus GN=Actn2 PE=1 SV=2	103.73	0.453872	2.11349	0.480526	0.436678	1.98299	0.649185	0.468566	2.10442	0.385623	4.0921	0.000321539	4.56246	0.000405044	0.896908	0.569717
F1RHM8	Uncharacterized protein	RANBP1	Ran-specific GTPase-activating protein OS=Homo sapiens GN=RANBP1 PE=1 SV=1	Ran-specific GTPase-activating protein OS=Mus musculus GN=Ranbp1 PE=1 SV=2	23.741	1.12813	0.79597	1.0464	1.10917	0.759394	1.12673	1.06509	0.961291	0.998052	0.7936	0.051008	0.762073	0.0423455	1.04137	0.375065
F1RHM9	Uncharacterized protein	TRMT2A	tRNA (uracil-5-)-methyltransferase homolog A OS=Homo sapiens GN=TRMT2A PE=1 SV=2	HpaII tinys locus 9c, isoform CRA_a OS=Mus musculus GN=Trmt2a PE=2 SV=1	67.595	1.12552	0.752948	1.14614	1.12151	0.812117	1.04863	1.02996	0.90454	1.04453	0.762389	0.0115346	0.753619	0.00994187	1.01164	0.796474
F1RHN0	Uncharacterized protein	DGCR8	Microprocessor complex subunit DGCR8 OS=Homo sapiens GN=DGCR8 PE=1 SV=1	Microprocessor complex subunit DGCR8 OS=Mus musculus GN=Dgcr8 PE=2 SV=2	85.908	0.998964	0.998451	1.00236	1.10909	0.947019	0.938915	0.976165	0.975636	1.00503	0.991447	0.766771	0.947115	0.316325	1.04681	0.394022
F1RHN1	Uncharacterized protein	TANGO2	Transport and Golgi organization protein 2 homolog OS=Homo sapiens GN=TANGO2 PE=2 SV=1	DNA segment, Chr 16, human D22S680E, expressed, isoform CRA_c OS=Mus musculus GN=Tango2 PE=2 SV=1	30.854				1.28218	0.588987	1.10396				0.53352		0.459365		1.16143
F1RHN2	Uncharacterized protein	ARVCF	Armadillo repeat protein deleted in velo-cardio-facial syndrome OS=Homo sapiens GN=ARVCF PE=1 SV=1	Armadillo repeat protein deleted in velo-cardio-facial syndrome homolog OS=Mus musculus GN=Arvcf PE=1 SV=2	104.27	1.097	0.710979	1.1852	1.15164	0.66658	1.15511	1.12689	0.71772	1.21514	0.589314	3.42681e-05	0.620726	4.57067e-05	0.949395	0.0633024
F1RHN3	Catechol O-methyltransferase	COMT			30.043	1.00127	0.895462	1.10894	1.01314	0.93059	1.0663	1.05798	0.836825	1.11015	0.810521	0.00652877	0.866713	0.0191791	0.935167	0.0358252
F1RHN4	Uncharacterized protein	TXNRD2	Thioredoxin reductase 2, mitochondrial OS=Homo sapiens GN=TXNRD2 PE=1 SV=3	Thioredoxin reductase 2, mitochondrial OS=Mus musculus GN=Txnrd2 PE=1 SV=4	55.131	0.97232	1.0183	1.01677	1.00124	1.03998	0.967755	0.979162	1.04477	0.974455	1.04869	0.0687444	1.05091	0.0138552	0.997886	0.913071
F1RHN7	Septin 5	SEPT5			42.718	1.22922	0.674253	1.08846	1.09419	0.817219	1.0749	1.21548	0.76298	1.03931	0.703929	0.0101812	0.63705	0.002022	1.10498	0.1085
F1RHN8	Uncharacterized protein	TRIM21	E3 ubiquitin-protein ligase TRIM21 OS=Homo sapiens GN=TRIM21 PE=1 SV=1	E3 ubiquitin-protein ligase TRIM21 OS=Mus musculus GN=Trim21 PE=2 SV=1	53.641	1.13371	0.745297	1.11079	1.02924	0.758052	1.18658				0.654379	0.0544445	0.695048	0.0958954	0.941488	0.415841
F1RHR8	Uncharacterized protein	MTOR	Serine/threonine-protein kinase mTOR OS=Homo sapiens GN=MTOR PE=1 SV=1	Serine/threonine-protein kinase mTOR OS=Mus musculus GN=Mtor PE=1 SV=2	289.13	1.05829	0.837368	1.06887	1.07048	0.829239	0.981934	1.0572	0.806067	1.15215	0.771998	0.0344907	0.776116	0.000285556	0.994694	0.918922
F1RHR9	Uncharacterized protein	EXOSC10	Exosome component 10 OS=Homo sapiens GN=EXOSC10 PE=1 SV=2	Exosome component 10 OS=Mus musculus GN=Exosc10 PE=1 SV=2	101.05	1.11897	0.824603	1.05081	1.11956	0.843427	1.02298	1.14391	0.772783	1.05638	0.779769	0.00260186	0.721612	0.00168248	1.08059	0.00367616
F1RHS6	Uncharacterized protein	PEX14	Peroxisomal membrane protein PEX14 OS=Homo sapiens GN=PEX14 PE=1 SV=1	Peroxisomal membrane protein PEX14 OS=Mus musculus GN=Pex14 PE=1 SV=1	40.97	0.821838	1.37507	0.819725	0.809117	1.40507	0.817646	0.843173	1.29587	0.848606	1.6396	0.00191747	1.64745	0.00189756	0.995234	0.793136
F1RHS7	Uncharacterized protein	DFFA	DNA fragmentation factor subunit alpha OS=Homo sapiens GN=DFFA PE=1 SV=1	DNA fragmentation factor subunit alpha OS=Mus musculus GN=Dffa PE=1 SV=2	36.504	0.975462	0.978875	1.04177							0.939631		1.0035		0.936355
F1RHT9	Uncharacterized protein	MED25	Mediator of RNA polymerase II transcription subunit 25 OS=Homo sapiens GN=MED25 PE=1 SV=2	Mediator of RNA polymerase II transcription subunit 25 OS=Mus musculus GN=Med25 PE=1 SV=1	78.035
F1RHU1	Uncharacterized protein	PNKP	Bifunctional polynucleotide phosphatase/kinase OS=Homo sapiens GN=PNKP PE=1 SV=1	Bifunctional polynucleotide phosphatase/kinase OS=Mus musculus GN=Pnkp PE=4 SV=1	57.531	1.14231	0.775924	1.0537	1.14126	0.841192	1.02877	1.11179	0.837014	1.1021	0.770633	0.00127786	0.72279	0.00114082	1.06619	0.064159
F1RHU2	Uncharacterized protein	AKT1S1	Proline-rich AKT1 substrate 1 OS=Homo sapiens GN=AKT1S1 PE=1 SV=1	Proline-rich AKT1 substrate 1 OS=Mus musculus GN=Akt1s1 PE=1 SV=1	27.318	0.987024	0.948093	1.05936	1.01735	0.892135	1.07922	1.04769	1.01941	0.970752	0.919694	0.169873	0.93695	0.21814	0.981583	0.646912
F1RHU3	Uncharacterized protein	TBC1D17	TBC1 domain family member 17 OS=Homo sapiens GN=TBC1D17 PE=1 SV=2	TBC1 domain family member 17 OS=Mus musculus GN=Tbc1d17 PE=2 SV=2	72.8	1.16297	0.75415	1.08803	1.12109	0.782077	1.08125	1.10066	0.736965	1.16997	0.680752	0.00197724	0.671603	0.000155451	1.01362	0.681585
F1RHU6	Uncharacterized protein	PRMT1	Protein arginine N-methyltransferase 1 OS=Homo sapiens GN=PRMT1 PE=1 SV=2	Protein arginine N-methyltransferase 1 OS=Mus musculus GN=Prmt1 PE=1 SV=1	40.802	0.979658	1.09102	0.922016	1.03052	0.923514	1.03175	0.981312	1.0557	0.957204	1.05471	0.437198	1.02632	0.6654	1.02766	0.514408
F1RHV7	Uncharacterized protein	FCGRT	IgG receptor FcRn large subunit p51 OS=Homo sapiens GN=FCGRT PE=1 SV=1	IgG receptor FcRn large subunit p51 OS=Mus musculus GN=Fcgrt PE=1 SV=1	38.94	0.885411	1.1693	0.932959	0.886997	1.18729	0.915962	0.985296	1.06007	0.937266	1.22628	0.0311575	1.23895	0.0141161	0.989777	0.802742
F1RHW0	Nitric oxide synthase-interacting protein	NOSIP			33.002	0.877832	1.1871	0.940512	0.995231	1.08244	0.965854	0.924416	1.12761	0.854243	1.23058	0.00975005	1.21436	0.012252	1.01336	0.810633
F1RHW4	Uncharacterized protein	RRAS	Ras-related protein R-Ras OS=Homo sapiens GN=RRAS PE=1 SV=1	Ras-related protein R-Ras OS=Mus musculus GN=Rras PE=2 SV=1	23.767
F1RHW5	Uncharacterized protein	SCAF1	Splicing factor, arginine/serine-rich 19 OS=Homo sapiens GN=SCAF1 PE=1 SV=3	Splicing factor, arginine/serine-rich 19 OS=Mus musculus GN=Scaf1 PE=1 SV=1	138.25	0.979034	0.979858	1.03118	1.16552	0.744725	1.07349	1.02698	0.98135	0.993943	0.873271	0.233075	0.853193	0.190562	1.02353	0.717735
F1RHX9	Uncharacterized protein	BCL2L12	Bcl-2-like protein 12 OS=Homo sapiens GN=BCL2L12 PE=1 SV=1	BCL2-like 12 (Proline rich), isoform CRA_b OS=Mus musculus GN=Bcl2l12 PE=2 SV=1	35.721	1.11638	1.03908	0.857833							1.21129		0.930763		1.30139
F1RHZ8	Uncharacterized protein	PIH1D1	PIH1 domain-containing protein 1 OS=Homo sapiens GN=PIH1D1 PE=1 SV=1	PIH1 domain-containing protein 1 OS=Mus musculus GN=Pih1d1 PE=2 SV=1	32.265
F1RHZ9	Uncharacterized protein	ALDH16A1	Aldehyde dehydrogenase family 16 member A1 OS=Homo sapiens GN=ALDH16A1 PE=1 SV=2	Aldehyde dehydrogenase family 16 member A1 OS=Mus musculus GN=Aldh16a1 PE=2 SV=2	85.432	0.963696	1.13061	0.920272	0.956867	1.12071	0.950093	0.942538	1.17929	0.884205	1.24542	0.00102754	1.19821	0.00480467	1.0394	0.190262
F1RI01	60S ribosomal protein L13a	RPL13A			23.709	1.19186	0.702901	1.06919	1.20651	0.880314	0.938904	1.2878	0.57019	1.0787	0.697618	0.0547545	0.584185	0.0208676	1.19417	0.0268366
F1RI15	Uncharacterized protein	HSPA4	Heat shock 70 kDa protein 4 OS=Homo sapiens GN=HSPA4 PE=1 SV=4	Heat shock 70 kDa protein 4 OS=Mus musculus GN=Hspa4 PE=2 SV=1	94.495	1.11307	0.892562	0.979289	1.06257	0.824847	1.01591	0.988829	1.07457	0.931743	0.953892	0.615144	0.88229	0.234239	1.08115	0.152972
F1RI16	Uncharacterized protein	AFF4	AF4/FMR2 family member 4 OS=Homo sapiens GN=AFF4 PE=1 SV=1	AF4/FMR2 family member 4 OS=Mus musculus GN=Aff4 PE=1 SV=1	124.13							0.945812	1.03642	1.0132	1.02292		1.09579		0.933493
F1RI18	Uncharacterized protein	UQCRQ	Cytochrome b-c1 complex subunit 8 OS=Homo sapiens GN=UQCRQ PE=1 SV=4	Cytochrome b-c1 complex subunit 8 OS=Mus musculus GN=Uqcrq PE=1 SV=3	9.7672	0.892736	1.01246	1.07154	0.898056	1.18983	0.934092	0.83751	1.02216	1.10611	1.03622	0.655191	1.22682	0.0623664	0.84464	0.0778009
F1RI32	Uncharacterized protein	---	Serine--tRNA ligase, mitochondrial OS=Homo sapiens GN=SARS2 PE=1 SV=1	Serine--tRNA ligase, mitochondrial OS=Mus musculus GN=Sars2 PE=1 SV=2	56.595	1.01393	0.884033	1.03885				0.933034	1.04422	1.01658	0.938128	0.57178	0.990389	0.929302	0.947232	0.397374
F1RI39	Uncharacterized protein	ACTN4	Alpha-actinin-4 OS=Homo sapiens GN=ACTN4 PE=1 SV=2	Alpha-actinin-4 OS=Mus musculus GN=Actn4 PE=1 SV=1	101.84	0.575356	1.89925	0.581711	0.481661	1.91809	0.668191	0.474645	1.99209	0.478183	3.36177	0.000207911	3.79289	5.91976e-06	0.886335	0.375099
F1RI41	Eukaryotic translation initiation factor 3 subunit K	EIF3K			25.043	1.07094	0.905404	1.03762	1.07082	0.873046	1.03387	0.952581	0.972668	1.02183	0.889374	0.0568311	0.88908	0.0858784	1.00033	0.993899
F1RI50	Uncharacterized protein	FOXK1	Forkhead box protein K1 OS=Homo sapiens GN=FOXK1 PE=1 SV=1	Forkhead box protein K1 OS=Mus musculus GN=Foxk1 PE=1 SV=2	65.629	1.0946	0.859043	1.06995	1.08981	0.891401	1.0305	1.04673	0.935397	1.03448	0.856745	0.00841158	0.831236	0.00379526	1.03069	0.181897
F1RI72	Uncharacterized protein	GOLGA3	Golgin subfamily A member 3 OS=Homo sapiens GN=GOLGA3 PE=1 SV=2	Golgin subfamily A member 3 OS=Mus musculus GN=Golga3 PE=2 SV=1	153.37	1.05589	0.828423	1.12458	1.02421	0.864093	1.09767	1.14647	0.856065	1.01731	0.786706	0.0121968	0.789872	0.0186024	0.995992	0.933641
F1RI80	Uncharacterized protein	BRAT1	BRCA1-associated ATM activator 1 OS=Homo sapiens GN=BRAT1 PE=1 SV=2	BRCA1-associated ATM activator 1 OS=Mus musculus GN=Brat1 PE=2 SV=1	87.108	1.13403	0.767948	1.07049	1.14321	0.730712	1.10628	1.07396	0.771769	1.15968	0.680492	0.00125559	0.677498	0.000461799	1.00442	0.891651
F1RI83	Uncharacterized protein	PATL1	Protein PAT1 homolog 1 OS=Homo sapiens GN=PATL1 PE=1 SV=2	Protein PAT1 homolog 1 OS=Mus musculus GN=Patl1 PE=1 SV=2	86.662	1.22632	0.643844	1.11894	1.07314	1.04501	0.893307				0.839287	0.571495	0.734459	0.349954	1.14273	0.415289
F1RI88	Uncharacterized protein	STX3	Syntaxin-3 OS=Homo sapiens GN=STX3 PE=1 SV=3	Syntaxin-3 OS=Mus musculus GN=Stx3 PE=2 SV=1	33.095
F1RI89	Uncharacterized protein	MRPL16	39S ribosomal protein L16, mitochondrial OS=Homo sapiens GN=MRPL16 PE=1 SV=1	39S ribosomal protein L16, mitochondrial OS=Mus musculus GN=Mrpl16 PE=2 SV=1	28.632	0.749788	1.48296	0.786884	0.797929	1.45861	0.780684	0.891147	1.27485	0.82575	1.76175	0.00904026	1.72885	0.00305612	1.01903	0.756504
F1RIA5	Uncharacterized protein	VPS37C	Vacuolar protein sorting-associated protein 37C OS=Homo sapiens GN=VPS37C PE=1 SV=2	Vacuolar protein sorting-associated protein 37C OS=Mus musculus GN=Vps37c PE=2 SV=1	38.882				1.14377	0.801575	1.04328	0.920476	1.16203	0.911287	1.00462	0.98438	0.951244	0.838255	1.05611	0.721714
F1RIA7	Uncharacterized protein	TMEM109	Transmembrane protein 109 OS=Homo sapiens GN=TMEM109 PE=1 SV=1	Transmembrane protein 109 OS=Mus musculus GN=Tmem109 PE=1 SV=2	26.11	1.18769	0.748543	1.05432	1.18082	0.780098	1.02235	1.13808	0.810432	1.06269	0.745079	0.000491441	0.667051	9.14859e-05	1.11698	0.0041066
F1RIB1	Uncharacterized protein	C15orf40	UPF0235 protein C15orf40 OS=Homo sapiens GN=C15orf40 PE=1 SV=2	UPF0235 protein C15orf40 homolog OS=Mus musculus PE=2 SV=1	13.488
F1RIB4	Uncharacterized protein	---	Hepatoma-derived growth factor-related protein 3 OS=Homo sapiens GN=HDGFRP3 PE=1 SV=1	Hepatoma-derived growth factor-related protein 3 OS=Mus musculus GN=Hdgfrp3 PE=1 SV=2	19.306				0.747688	1.3301	0.940034				1.41495		1.77894		0.795385
F1RIC1	Uncharacterized protein	CCDC86	Coiled-coil domain-containing protein 86 OS=Homo sapiens GN=CCDC86 PE=1 SV=1	Coiled-coil domain-containing protein 86 OS=Mus musculus GN=Ccdc86 PE=1 SV=2	41.078	0.553829	1.70727	0.760815	0.660787	1.59432	0.786634	0.689696	1.46773	0.817578	2.01661	0.00525754	2.50449	0.000854366	0.805197	0.0503326
F1RID1	Uncharacterized protein	EFTUD1	Elongation factor Tu GTP-binding domain-containing protein 1 OS=Homo sapiens GN=EFTUD1 PE=1 SV=2	Elongation factor Tu GTP-binding domain-containing protein 1 OS=Mus musculus GN=Eftud1 PE=2 SV=1	54.906	1.17477	0.609547	1.19746	1.1396	0.762673	1.0814	1.13197	0.7282	1.18025	0.607214	0.00192777	0.609463	0.0069067	0.996309	0.920144
F1RIE0	Uncharacterized protein	MESDC2	LDLR chaperone MESD OS=Homo sapiens GN=MESDC2 PE=1 SV=2	LDLR chaperone MESD OS=Mus musculus GN=Mesdc2 PE=1 SV=1	25.877	0.648629	1.55376	0.814601	0.719672	1.26976	1.01895	0.682355	1.29008	0.886074	1.51256	0.0179781	2.00599	0.0138179	0.754022	0.0527752
F1RIE2	Uncharacterized protein	DDB1	DNA damage-binding protein 1 OS=Homo sapiens GN=DDB1 PE=1 SV=1	DNA damage-binding protein 1 OS=Mus musculus GN=Ddb1 PE=1 SV=2	126.95	0.766806	1.44921	0.790217	0.729187	1.49472	0.799012	0.762205	1.48352	0.767063	1.87899	6.44771e-06	1.96061	2.90108e-06	0.95837	0.101065
F1RIF0	Uncharacterized protein	---	Cell migration-inducing and hyaluronan-binding protein OS=Homo sapiens GN=CEMIP PE=1 SV=2	Protein KIAA1199 homolog OS=Mus musculus PE=2 SV=4	33.004	1.08745	0.598845	1.28709	1.19643	0.569577	1.19963	1.23524	0.504971	1.27808	0.444484	5.90332e-05	0.475515	0.000752261	0.934744	0.205124
F1RIF3	Uncharacterized protein	FAH	Fumarylacetoacetase OS=Homo sapiens GN=FAH PE=1 SV=2	Fumarylacetoacetase OS=Mus musculus GN=Fah PE=1 SV=2	46.141	0.542689	1.92266	0.573925	0.530574	1.91872	0.619852	0.501881	1.87457	0.584007	3.21521	4.25414e-07	3.62884	4.81353e-07	0.886016	0.0223255
F1RIF8	6-phosphogluconate dehydrogenase, decarboxylating	PGD			53.052	1.20667	0.825894	0.989595	1.1506	0.753469	1.07112	1.11383	0.946251	0.948788	0.839212	0.0842898	0.727612	0.0165467	1.15338	0.030075
F1RIF9	Uncharacterized protein	KIF1B	Kinesin-like protein KIF1B OS=Homo sapiens GN=KIF1B PE=1 SV=5	Kinesin-like protein KIF1B OS=Mus musculus GN=Kif1b PE=1 SV=2	203.75	1.29052	0.579736	1.1189	1.16734	0.619424	1.1391	1.1827	0.684579	1.14725	0.553188	0.00207147	0.51743	0.000387875	1.06911	0.175435
F1RIG2	Uncharacterized protein	LOC100521136	Ubiquitin conjugation factor E4 B OS=Homo sapiens GN=UBE4B PE=1 SV=1	Ubiquitin conjugation factor E4 B OS=Mus musculus GN=Ube4b PE=1 SV=3	106.9	1.06823	0.890088	1.03818	1.19425	0.640189	1.13935				0.702757	0.199855	0.676371	0.162432	1.03901	0.653739
F1RIH6	Uncharacterized protein	TMEM201	Transmembrane protein 201 OS=Homo sapiens GN=TMEM201 PE=1 SV=1	Transmembrane protein 201 OS=Mus musculus GN=Tmem201 PE=2 SV=1	71.6	0.833749	1.38119	0.803228				1.10778	0.80427	1.09648	1.15042	0.714584	1.12564	0.751566	1.02201	0.926564
F1RII4	Uncharacterized protein	PARK7	Protein DJ-1 OS=Homo sapiens GN=PARK7 PE=1 SV=2	Protein DJ-1 OS=Mus musculus GN=Park7 PE=1 SV=1	14.42	0.796524	1.41252	0.808605	0.804223	1.36302	0.873142	0.766469	1.44119	0.749999	1.73403	0.000385522	1.7813	0.000172904	0.973463	0.614142
F1RII5	Uncharacterized protein	LOC100515788	Hemoglobin subunit beta OS=Homo sapiens GN=HBB PE=1 SV=2	Hemoglobin subunit beta-1 OS=Mus musculus GN=Hbb-b1 PE=1 SV=2	15.635
F1RII7	Hemoglobin subunit beta	HBB			16.166	1.10263	0.257146	1.54567	0.98363	0.322848	1.5928	1.62204	0.471477	0.947931	0.25731	0.0307834	0.283545	0.0354601	0.907474	0.681747
F1RIJ5	Uncharacterized protein	DNAJC11	DnaJ homolog subfamily C member 11 OS=Homo sapiens GN=DNAJC11 PE=1 SV=2	DnaJ homolog subfamily C member 11 OS=Mus musculus GN=Dnajc11 PE=2 SV=2	43.28	0.90918	1.08085	1.00237	0.922754	1.18964	0.897551	0.942622	1.04312	1.00205	1.14185	0.0739907	1.19429	0.0490582	0.956091	0.347632
F1RIJ6	Uncharacterized protein	ZBTB48	Zinc finger and BTB domain-containing protein 48 OS=Homo sapiens GN=ZBTB48 PE=1 SV=2	Zinc finger and BTB domain-containing protein 48 OS=Mus musculus GN=Zbtb48 PE=1 SV=1	77.556
F1RIK3	Uncharacterized protein	ACOT7	Cytosolic acyl coenzyme A thioester hydrolase OS=Homo sapiens GN=ACOT7 PE=1 SV=3	Cytosolic acyl coenzyme A thioester hydrolase OS=Mus musculus GN=Acot7 PE=2 SV=1	40.189	1.07135	0.603249	1.28553	1.16412	0.615123	1.2055	1.09881	0.686555	1.22341	0.512843	7.33695e-05	0.571317	0.000233908	0.897651	0.0265872
F1RIN3	Uncharacterized protein	NTF4	Neurotrophin-4 OS=Homo sapiens GN=NTF4 PE=1 SV=1	Neurotrophin-4 OS=Mus musculus GN=Ntf4 PE=2 SV=1	22.311	1.29537	0.942607	0.782446	1.28062	1.51179	0.29164				2.2851	0.210408	0.952797	0.866019	2.39831	0.2008
F1RIP1	Glycogen [starch] synthase	GYS1			83.775	1.09549	0.783183	1.11107	0.93248	0.756015	1.277	1.09286	0.742886	1.17169	0.641077	0.00945524	0.731244	0.0303434	0.876694	0.114505
F1RIP4	RuvB-like helicase	RUVBL2			51.172	1.11163	0.723427	1.13388	1.08057	0.757839	1.14582	1.09296	0.808616	1.09635	0.678273	0.000694764	0.69704	0.00241666	0.973076	0.172263
F1RIP6	Uncharacterized protein	NUCB1	Nucleobindin-1 OS=Homo sapiens GN=NUCB1 PE=1 SV=4	Nucleobindin-1 OS=Mus musculus GN=Nucb1 PE=1 SV=2	53.202	0.829637	1.18339	0.964393	0.823326	1.17436	1.02386	0.837591	1.18405	0.946518	1.20684	0.0119568	1.42209	6.77222e-07	0.848637	0.021318
F1RIQ4	Uncharacterized protein	BAX	Apoptosis regulator BAX OS=Homo sapiens GN=BAX PE=1 SV=1	Apoptosis regulator BAX OS=Mus musculus GN=Bax PE=1 SV=1	21.257	1.06386	0.851446	1.10883	1.0723	0.727318	1.09903	0.984861	0.790302	1.04437	0.728445	0.00479084	0.759069	0.00623107	0.959656	0.277864
F1RIR2	Uncharacterized protein	STX4	Syntaxin-4 OS=Homo sapiens GN=STX4 PE=1 SV=2	Syntaxin-4 OS=Mus musculus GN=Stx4 PE=1 SV=1	34.394	0.926835	1.11524	0.975721	0.832667	1.21425	0.964346	0.918921	1.11976	0.954778	1.19151	0.0258282	1.28779	0.00441125	0.925239	0.13421
F1RIR3	Uncharacterized protein	ZNF668	Zinc finger protein 668 OS=Homo sapiens GN=ZNF668 PE=1 SV=3	Zinc finger protein 668 OS=Mus musculus GN=Znf668 PE=2 SV=1	67.872	0.95673	0.772214	1.24798	1.17895	0.723737	0.994504	1.13338	0.759063	1.12529	0.669586	0.032682	0.689804	0.0331444	0.97069	0.758136
F1RIR6	Uncharacterized protein	VKORC1	Vitamin K epoxide reductase complex subunit 1 OS=Homo sapiens GN=VKORC1 PE=1 SV=1	Vitamin K epoxide reductase complex subunit 1 OS=Mus musculus GN=Vkorc1 PE=2 SV=1	18.139	0.993416	1.03444	0.998276	0.949297	1.13982	0.923152	1.13305	0.958412	0.919994	1.1025	0.19876	1.0185	0.816124	1.08247	0.295669
F1RIR7	Uncharacterized protein	BCKDK	[3-methyl-2-oxobutanoate dehydrogenase [lipoamide]] kinase, mitochondrial OS=Homo sapiens GN=BCKDK PE=1 SV=2	[3-methyl-2-oxobutanoate dehydrogenase [lipoamide]] kinase, mitochondrial OS=Mus musculus GN=Bckdk PE=1 SV=1	46.377	0.682976	1.55616	0.780994				0.855887	1.14162	0.990532	1.52286	0.227108	1.7531	0.181547	0.868666	0.484786
F1RIS6	Uncharacterized protein	MMAB	Cob(I)yrinic acid a,c-diamide adenosyltransferase, mitochondrial OS=Homo sapiens GN=MMAB PE=1 SV=1	Cob(I)yrinic acid a,c-diamide adenosyltransferase, mitochondrial OS=Mus musculus GN=Mmab PE=1 SV=1	27.25	0.835374	1.26976	0.903705	0.976846	1.03858	0.987187	0.980396	1.03579	0.982267	1.16392	0.170827	1.19749	0.127771	0.971967	0.656657
F1RIS7	Uncharacterized protein	C3H16orf58	UPF0420 protein C16orf58 OS=Homo sapiens GN=C16orf58 PE=1 SV=2	Protein BC017158 OS=Mus musculus GN=BC017158 PE=2 SV=1	21.905	0.787275	1.31457	0.906683							1.44986		1.66977		0.868302
F1RIS8	Mevalonate kinase	MVK			42.704	1.2549	0.655326	1.08546	1.31752	0.603229	1.05903	1.1579	0.771711	1.05923	0.633721	0.0137059	0.544261	0.00116312	1.16437	0.0588129
F1RIU0	Uncharacterized protein	MRPS17	28S ribosomal protein S17, mitochondrial OS=Homo sapiens GN=MRPS17 PE=2 SV=1	28S ribosomal protein S17, mitochondrial OS=Mus musculus GN=Mrps17 PE=2 SV=1	14.429	0.854743	1.24353	0.909992	0.929597	1.27891	0.837767	1.04801	1.05615	0.900303	1.3514	0.0357994	1.26347	0.0515557	1.06959	0.39501
F1RIU3	Uncharacterized protein	LOC102163415	T-complex protein 1 subunit zeta OS=Homo sapiens GN=CCT6A PE=1 SV=3	T-complex protein 1 subunit zeta OS=Mus musculus GN=Cct6a PE=1 SV=3	57.97	1.18139	0.772888	1.04299	1.12683	0.748552	1.11395	1.09389	0.910962	1.00398	0.769522	0.021412	0.71497	0.0111066	1.0763	0.125638
F1RIU4	Uncharacterized protein	SUMF2	Sulfatase-modifying factor 2 OS=Homo sapiens GN=SUMF2 PE=1 SV=2	Sulfatase-modifying factor 2 OS=Mus musculus GN=Sumf2 PE=2 SV=2	33.846	0.907488	1.02571	1.03328	0.900023	1.08425	1.0526	0.91938	1.01711	1.04743	0.998011	0.931948	1.14675	0.0185302	0.870292	7.40152e-05
F1RIU9	Uncharacterized protein	CHCHD2	Coiled-coil-helix-coiled-coil-helix domain-containing protein 2, mitochondrial OS=Homo sapiens GN=CHCHD2 PE=1 SV=1	Coiled-coil-helix-coiled-coil-helix domain-containing protein 2, mitochondrial OS=Mus musculus GN=Chchd2 PE=2 SV=1	15.635	1.0222	0.967596	1.01092	0.983429	1.0203	0.974502	0.959227	1.05465	0.962373	1.03214	0.35449	1.0262	0.458251	1.00579	0.820805
F1RIV4	Uncharacterized protein	INTS1	Integrator complex subunit 1 OS=Homo sapiens GN=INTS1 PE=1 SV=2	Integrator complex subunit 1 OS=Mus musculus GN=Ints1 PE=2 SV=2	242.66	1.09617	0.770995	1.10086	1.16897	0.826004	1.00134	1.13248	0.77288	1.0969	0.740796	0.00439067	0.697512	0.000280046	1.06205	0.174701
F1RIW2	Uncharacterized protein	SPOCK3	Testican-3 OS=Homo sapiens GN=SPOCK3 PE=1 SV=2	Testican-3 OS=Mus musculus GN=Spock3 PE=2 SV=2	32.514	1.33559	0.420901	1.23924	1.40442	0.472271	1.16011	1.30043	0.496225	1.23046	0.382774	2.67896e-05	0.343873	4.09297e-05	1.11313	0.0272773
F1RIW5	Uncharacterized protein	PSMG3	Proteasome assembly chaperone 3 OS=Homo sapiens GN=PSMG3 PE=1 SV=1	Proteasome assembly chaperone 3 OS=Mus musculus GN=Psmg3 PE=1 SV=1	13.019				1.17037	0.821479	1.00136	1.22243	0.792979	1.00311	0.805429	0.0456846	0.674715	0.0142216	1.19373	0.0845262
F1RIX8	Uncharacterized protein	CBR4	Carbonyl reductase family member 4 OS=Homo sapiens GN=CBR4 PE=1 SV=3	Carbonyl reductase family member 4 OS=Mus musculus GN=Cbr4 PE=1 SV=2	25.225	0.962547	1.03184	1.04008	1.03675	0.945453	1.0106	1.00623	0.926842	1.08236	0.926936	0.130359	0.966262	0.440222	0.959301	0.229028
F1RIY0	Uncharacterized protein	NEK1	Serine/threonine-protein kinase Nek1 OS=Homo sapiens GN=NEK1 PE=1 SV=2	Nek1 protein OS=Mus musculus GN=Nek1 PE=2 SV=1	137.84	1.06728	0.800455	1.12106	1.08096	0.915206	1.00061				0.808634	0.135058	0.798636	0.160768	1.01252	0.861987
F1RIY4	Uncharacterized protein	---	UPF0609 protein C4orf27 OS=Homo sapiens GN=C4orf27 PE=1 SV=2	UPF0609 protein C4orf27 homolog OS=Mus musculus PE=2 SV=1	39.403	1.14367	0.721324	1.11189	1.1738	0.763076	1.04649	1.06453	0.832159	1.10664	0.709509	0.00226339	0.68497	0.00150233	1.03583	0.380239
F1RIY5	Uncharacterized protein	C7orf50			19.138	1.12224	0.875996	1.00169	1.10618	1.02	0.885094	1.11096	0.874495	1.02368	0.95191	0.510832	0.829642	0.0577642	1.14737	0.0780418
F1RIY7	Uncharacterized protein	LOC100737805	SUN domain-containing protein 1 OS=Homo sapiens GN=SUN1 PE=1 SV=3	SUN domain-containing protein 1 OS=Mus musculus GN=Sun1 PE=1 SV=2	99.079	0.805383	1.31069	0.89367	0.740682	1.37079	0.838942	0.857267	1.17878	0.925866	1.45206	0.0095988	1.60621	0.00389511	0.904026	0.119495
F1RIY8	Uncharacterized protein	LOC100520368	HEAT repeat-containing protein 2 OS=Homo sapiens GN=HEATR2 PE=1 SV=4	HEAT repeat containing 2 OS=Mus musculus GN=Heatr2 PE=2 SV=1	89.592	0.937824	1.10106	0.964384							1.14172		1.17406		0.972458
F1RIZ9	Polypeptide N-acetylgalactosaminyltransferase	GALNT7			70.617	0.874394	1.1986	0.899614	0.917038	1.10118	0.965894	0.89663	1.05632	1.01135	1.16658	0.0428144	1.24852	0.0260799	0.934374	0.182781
F1RJ12	Protein phosphatase 1 regulatory subunit	PPP1R3D			32.38
F1RJ25	Fructose-bisphosphate aldolase	ALDOC			39.376	0.37692	2.25597	0.42258	0.382579	2.12885	0.570116	0.47208	2.01088	0.477757	4.34948	0.000151071	5.19309	0.000358502	0.837552	0.214135
F1RJ28	Uncharacterized protein	---	Serine/threonine-protein kinase NLK OS=Homo sapiens GN=NLK PE=1 SV=2	Serine/threonine-protein kinase NLK OS=Mus musculus GN=Nlk PE=1 SV=2	13.057							0.983378	1.00998	1.00523	1.00472		1.02705		0.978259
F1RJ33	Galectin	LGALS9			39.677	1.34987	0.539082	1.10183	0.979607	0.917017	1.09186	1.43023	0.70425	0.901821	0.697898	0.085003	0.574606	0.0420566	1.21457	0.249211
F1RJ34	Uncharacterized protein	MZT1	Mitotic-spindle organizing protein 1 OS=Homo sapiens GN=MZT1 PE=1 SV=2	Mitotic-spindle organizing protein 1 OS=Mus musculus GN=Mzt1 PE=1 SV=1	8.3076				1.05886	1.01553	0.932392	1.04189	0.957349	1.00423	1.01872	0.734208	0.93913	0.252274	1.08475	0.248717
F1RJ36	Uncharacterized protein	---	Dachshund homolog 1 OS=Homo sapiens GN=DACH1 PE=1 SV=3	Dachshund homolog 1 OS=Mus musculus GN=Dach1 PE=1 SV=1	42.742	0.908329	1.11552	0.97812	0.846983	1.3286	0.850399				1.33667	0.158591	1.39241	0.169163	0.959964	0.673605
F1RJ44	Uncharacterized protein	TDRD3	Tudor domain-containing protein 3 OS=Homo sapiens GN=TDRD3 PE=1 SV=1	Tudor domain-containing protein 3 OS=Mus musculus GN=Tdrd3 PE=1 SV=4	83.567	0.79502	1.35015	0.875222	0.832187	1.32233	0.860526	0.999413	0.978909	0.979639	1.3447	0.109718	1.39015	0.0844642	0.96731	0.711073
F1RJ62	Uncharacterized protein	UTP6	U3 small nucleolar RNA-associated protein 6 homolog OS=Homo sapiens GN=UTP6 PE=1 SV=2	U3 small nucleolar RNA-associated protein 6 homolog OS=Mus musculus GN=Utp6 PE=2 SV=1	70.556	0.950761	1.06597	0.966821	1.00701	0.941049	1.04556	0.907339	0.982447	0.997906	0.993084	0.881825	1.0434	0.427643	0.951773	0.262553
F1RJ74	Uncharacterized protein	SUGT1	Suppressor of G2 allele of SKP1 homolog OS=Homo sapiens GN=SUGT1 PE=1 SV=3	Suppressor of G2 allele of SKP1 homolog OS=Mus musculus GN=Sugt1 PE=2 SV=3	38.418	1.0156	1.00809	0.973395	0.960239	1.09469	0.959366	0.966888	1.06383	0.938145	1.103	0.0450851	1.07608	0.0804711	1.02502	0.316462
F1RJ93	Transgelin	TAGLN2			23.302	1.10668	0.710107	1.16943	1.11099	0.67497	1.1867	1.12844	0.758344	1.10709	0.61891	0.000210207	0.640571	0.00207653	0.966185	0.243699
F1RJ94	Diacylglycerol kinase	DGKH			129.41	0.894468	1.24116	0.875833				1.1599	0.826821	1.02648	1.08709	0.760531	1.00663	0.980811	1.07993	0.678754
F1RJA8	Uncharacterized protein	TPRG1L	Tumor protein p63-regulated gene 1-like protein OS=Homo sapiens GN=TPRG1L PE=1 SV=1	Tumor protein p63-regulated gene 1-like protein OS=Mus musculus GN=Tprg1l PE=1 SV=1	30.486	1.04126	0.897854	1.05573	1.08182	0.866399	1.04287				0.840682	0.0336077	0.830987	0.0232095	1.01167	0.654122
F1RJC3	Uncharacterized protein	---	Cyclin-L2 OS=Homo sapiens GN=CCNL2 PE=1 SV=1	Cyclin-L2 OS=Mus musculus GN=Ccnl2 PE=2 SV=1	21.916	1.15051	0.787967	1.05638	1.22402	0.871183	0.908386	1.14209	0.866657	1.00308	0.851057	0.0551909	0.718247	0.000923752	1.18491	0.0312259
F1RJC5	Uncharacterized protein	CDK11B	Cyclin-dependent kinase 11B OS=Homo sapiens GN=CDK11B PE=1 SV=3	Cyclin-dependent kinase 11B OS=Mus musculus GN=Cdk11b PE=1 SV=2	90.808	1.03902	0.929811	1.01081	1.04708	0.938816	1.02723	1.03872	0.935241	0.998423	0.923402	0.00697033	0.89729	9.54934e-06	1.0291	0.0598614
F1RJC7	Uncharacterized protein	MIB2	E3 ubiquitin-protein ligase MIB2 OS=Homo sapiens GN=MIB2 PE=1 SV=3	E3 ubiquitin-protein ligase MIB2 OS=Mus musculus GN=Mib2 PE=1 SV=2	104.5	0.947225	1.15954	0.90228							1.28512		1.22414		1.04981
F1RJE4	Uncharacterized protein	LOC100525876	ATPase family AAA domain-containing protein 3A OS=Homo sapiens GN=ATAD3A PE=1 SV=2	ATPase family AAA domain-containing protein 3 OS=Mus musculus GN=Atad3 PE=1 SV=1	66.591	0.971243	1.11488	0.958653	0.991218	1.14078	0.889275	1.05753	0.962591	0.998156	1.13077	0.142841	1.06565	0.3646	1.0611	0.234244
F1RJE8	Uncharacterized protein	CPSF3L	Integrator complex subunit 11 OS=Homo sapiens GN=CPSF3L PE=1 SV=2	Integrator complex subunit 11 OS=Mus musculus GN=Cpsf3l PE=2 SV=1	67.599	1.1161	0.762934	1.11075	1.11398	0.764292	1.08359	1.1199	0.824522	1.09158	0.715704	0.00149778	0.702019	0.00350524	1.01949	0.111918
F1RJF7	Uncharacterized protein	SDF4	45 kDa calcium-binding protein OS=Homo sapiens GN=SDF4 PE=1 SV=1	45 kDa calcium-binding protein OS=Mus musculus GN=Sdf4 PE=2 SV=1	41.464	0.920353	1.08791	0.927586							1.17284		1.18206		0.992202
F1RJG8	Uncharacterized protein	C12orf43		Protein 2210016L21Rik (Fragment) OS=Mus musculus GN=2210016L21Rik PE=4 SV=1	29.882	0.946697	0.988537	1.05923	0.842142	1.34372	0.841497	0.51564	1.77224	0.673307	1.59458	0.139273	1.78109	0.10007	0.895281	0.628156
F1RJH2	Short-chain-specific acyl-CoA dehydrogenase, mitochondrial	ACADS			44.678	0.912887	1.04544	1.03438	0.976169	1.01916	1.01172	0.927571	1.01891	1.04036	0.999043	0.94047	1.09475	0.0275405	0.912575	0.0269336
F1RJH8	Uncharacterized protein	ASL	Argininosuccinate lyase OS=Homo sapiens GN=ASL PE=1 SV=4	Argininosuccinate lyase OS=Mus musculus GN=Asl PE=2 SV=1	51.721	1.06794	0.868557	1.05814							0.82083		0.813299		1.00926
F1RJH9	Uncharacterized protein	TPST1	Protein-tyrosine sulfotransferase 1 OS=Homo sapiens GN=TPST1 PE=2 SV=1	Protein-tyrosine sulfotransferase 1 OS=Mus musculus GN=Tpst1 PE=2 SV=1	42.153	1.02806	0.899766	1.06606	0.963894	0.843963	1.12754	1.01344	0.843523	1.14348	0.775306	0.00143179	0.860869	0.00666199	0.900608	0.0238501
F1RJI1	Uncharacterized protein	MLEC	Malectin OS=Homo sapiens GN=MLEC PE=1 SV=1	Malectin OS=Mus musculus GN=Mlec PE=2 SV=2	32.2	0.797726	1.27082	0.921175	0.769962	1.33574	0.884966	0.818942	1.18956	0.993769	1.3558	0.00419603	1.59058	0.00426958	0.852395	0.0340094
F1RJI2	Uncharacterized protein	RABGEF1	Rab5 GDP/GTP exchange factor OS=Homo sapiens GN=RABGEF1 PE=1 SV=2	Rab5 GDP/GTP exchange factor OS=Mus musculus GN=Rabgef1 PE=1 SV=1	57.017	1.30262	0.616348	1.12643	1.23913	0.636567	1.09435	1.14204	0.632444	1.22135	0.547731	0.00448615	0.511799	0.00536094	1.07021	0.25503
F1RJI7	Cytochrome c oxidase subunit 6A, mitochondrial	COX6A1			12.247	0.873255	1.11475	1.01089	0.847317	1.07145	1.07686	0.808936	1.12654	1.04838	1.05632	0.0825078	1.30964	0.000511925	0.80657	0.00163756
F1RJI9	Glutamyl-tRNA(Gln) amidotransferase subunit C, mitochondrial	GATC			15.258	0.817511	1.3584	0.838934	0.930129	1.28246	0.814926	0.882767	1.27212	0.836117	1.57149	0.00182864	1.48759	0.000644232	1.0564	0.285992
F1RJJ0	Uncharacterized protein	SRSF9	Serine/arginine-rich splicing factor 9 OS=Homo sapiens GN=SRSF9 PE=1 SV=1	Serine/arginine-rich splicing factor 9 OS=Mus musculus GN=Srsf9 PE=1 SV=1	25.574	0.882092	1.09156	1.03134	0.893771	1.10642	1.00257	0.86507	1.07836	1.03592	1.06727	0.00761318	1.2406	5.3675e-05	0.860285	0.00055348
F1RJJ2	Uncharacterized protein	TYW1	S-adenosyl-L-methionine-dependent tRNA 4-demethylwyosine synthase OS=Homo sapiens GN=TYW1 PE=2 SV=2	tRNA wybutosine-synthesizing protein 1 homolog OS=Mus musculus GN=Tyw1 PE=1 SV=1	83.113	0.609166	1.59339	0.814415	0.765853	1.53417	0.743433	0.777544	1.44742	0.757641	1.97582	0.000570416	2.12537	0.000414881	0.929637	0.430197
F1RJJ3	Uncharacterized protein	SBDS	Ribosome maturation protein SBDS OS=Homo sapiens GN=SBDS PE=1 SV=4	Ribosome maturation protein SBDS OS=Mus musculus GN=Sbds PE=1 SV=4	28.745	1.18528	0.571219	1.19814	1.21659	0.558181	1.1733	1.20865	0.593033	1.23224	0.477965	3.65178e-05	0.477061	1.49767e-06	1.00189	0.914224
F1RJJ8	Uncharacterized protein	---	Autism susceptibility gene 2 protein OS=Homo sapiens GN=AUTS2 PE=1 SV=1	Protein Auts2 OS=Mus musculus GN=Auts2 PE=2 SV=1	110.44				1.13656	0.772173	1.07582				0.717756		0.679397		1.05646
F1RJK0	2-methoxy-6-polyprenyl-1,4-benzoquinol methylase, mitochondrial	COQ5			37.683	0.934311	1.14169	0.930422	0.901028	1.26358	0.85596	0.943881	1.05259	0.998859	1.24149	0.0456023	1.24418	0.0602393	0.997839	0.96659
F1RJK5	Uncharacterized protein	---	Translational activator GCN1 OS=Homo sapiens GN=GCN1L1 PE=1 SV=6	Protein Gcn1l1 OS=Mus musculus GN=Gcn1l1 PE=2 SV=1	139.71	1.18444	0.677924	1.10751	1.14994	0.693093	1.14353	1.08074	0.776359	1.12049	0.636915	0.00265747	0.628785	0.00061181	1.01293	0.688893
F1RJL0	Uncharacterized protein	RCC1L	Williams-Beuren syndrome chromosomal region 16 protein OS=Homo sapiens GN=WBSCR16 PE=1 SV=2	Williams-Beuren syndrome chromosomal region 16 protein homolog OS=Mus musculus GN=Wbscr16 PE=2 SV=1	50.713	0.928128	1.17613	0.904565	0.995358	1.05686	0.958114	0.888908	1.13932	0.962689	1.19358	0.0191135	1.19909	0.0170381	0.995408	0.911991
F1RJL6	Uncharacterized protein	CLIP2	CAP-Gly domain-containing linker protein 2 OS=Homo sapiens GN=CLIP2 PE=1 SV=1	CAP-Gly domain-containing linker protein 2 OS=Mus musculus GN=Clip2 PE=1 SV=2	91.078	0.974578	1.07775	0.952101	0.994451	1.03748	0.990574	0.981821	0.993453	1.0231	1.04819	0.210921	1.05349	0.157143	0.994966	0.834523
F1RJL8	Uncharacterized protein	WBSCR27	Williams-Beuren syndrome chromosomal region 27 protein OS=Homo sapiens GN=WBSCR27 PE=2 SV=2	Protein Wbscr27 OS=Mus musculus GN=Wbscr27 PE=2 SV=1	26.849	1.15753	0.737808	1.09587	1.12126	0.759787	1.10075				0.681773	0.0149328	0.657191	0.00666546	1.0374	0.259761
F1RJM2	Endoplasmic reticulum resident protein 29	ERP29			29.328	0.62172	1.59324	0.850681	0.586	1.42028	0.979124	0.629942	1.53479	0.831217	1.70923	0.000824624	2.47505	0.00183957	0.690585	0.0205829
F1RJM8	Uncharacterized protein	ABHD11	Alpha/beta hydrolase domain-containing protein 11 OS=Homo sapiens GN=ABHD11 PE=2 SV=1	Alpha/beta hydrolase domain-containing protein 11 OS=Mus musculus GN=Abhd11 PE=2 SV=1	33.983	0.907976	1.02924	1.01186	0.822077	1.202	0.984853	0.905651	1.04641	1.03989	1.07938	0.278494	1.24356	0.040789	0.867979	0.0235366
F1RJN0	Uncharacterized protein	WBSCR22	Ribosome biogenesis methyltransferase WBSCR22 OS=Homo sapiens GN=WBSCR22 PE=1 SV=2	Ribosome biogenesis methyltransferase WBSCR22 OS=Mus musculus GN=Wbscr22 PE=2 SV=1	31.684	1.01178	0.982512	1.00523	1.04824	0.986772	0.967477				0.998265	0.942525	0.955953	0.239347	1.04426	0.238212
F1RJN4	Uncharacterized protein	TBL2	Transducin beta-like protein 2 OS=Homo sapiens GN=TBL2 PE=1 SV=1	Transducin beta-like protein 2 OS=Mus musculus GN=Tbl2 PE=2 SV=2	49.738	0.965208	1.04964	0.979211	0.983346	1.10924	0.92365	1.03716	0.927322	1.03302	1.0512	0.475143	1.03366	0.607689	1.01697	0.6893
F1RJP8	Uncharacterized protein	MSRA	Mitochondrial peptide methionine sulfoxide reductase OS=Homo sapiens GN=MSRA PE=1 SV=1	Mitochondrial peptide methionine sulfoxide reductase OS=Mus musculus GN=Msra PE=1 SV=1	26.262				1.0422	0.943475	1.01119	1.17221	0.783791	1.05807	0.834727	0.258661	0.78001	0.146812	1.07015	0.454534
F1RJP9	Uncharacterized protein	KIF13B	Kinesin-like protein KIF13B OS=Homo sapiens GN=KIF13B PE=1 SV=2	Protein Kif13b OS=Mus musculus GN=Kif13b PE=2 SV=1	204.15	1.00297	0.910679	1.10282	1.00365	0.967135	1.03137	0.961857	0.933724	1.06116	0.879886	0.00953932	0.947133	0.0730021	0.928999	0.0461072
F1RJQ0	Uncharacterized protein	HMBOX1	Homeobox-containing protein 1 OS=Homo sapiens GN=HMBOX1 PE=1 SV=1	Homeobox-containing protein 1 OS=Mus musculus GN=Hmbox1 PE=2 SV=1	47.086	1.05314	0.851772	1.02576	1.05135	1.04215	0.915789	1.006	0.898585	1.09547	0.919491	0.353084	0.897768	0.199694	1.0242	0.691441
F1RJQ5	Uncharacterized protein	INTS9	Integrator complex subunit 9 OS=Homo sapiens GN=INTS9 PE=1 SV=2	Integrator complex subunit 9 OS=Mus musculus GN=Ints9 PE=2 SV=1	64.731	1.16981	0.739173	1.08338	1.10457	0.749628	1.02051	1.03275	0.843772	1.12562	0.722269	0.0027678	0.705315	0.00361213	1.02404	0.633704
F1RJQ6	Uncharacterized protein	EXTL3	Exostosin-like 3 OS=Homo sapiens GN=EXTL3 PE=1 SV=1	Exostoses (Multiple)-like 3 OS=Mus musculus GN=Extl3 PE=2 SV=1	72.71				1.152	0.746501	1.08431				0.688459		0.648004		1.06243
F1RJQ9	Uncharacterized protein	---	60S acidic ribosomal protein P1 OS=Homo sapiens GN=RPLP1 PE=1 SV=1	60S acidic ribosomal protein P1 OS=Mus musculus GN=Rplp1 PE=2 SV=1	11.633	0.944862	1.21661	0.852226							1.42756		1.2876		1.1087
F1RJR2	Uncharacterized protein	LOC100156764	Elongator complex protein 3 OS=Homo sapiens GN=ELP3 PE=1 SV=2	Elongator complex protein 3 OS=Mus musculus GN=Elp3 PE=2 SV=1	34.561	1.12713	0.837335	1.0326	1.16478	0.830237	0.99876	1.20189	0.808749	1.00615	0.815246	0.000184385	0.708777	0.00139697	1.15022	0.00903629
F1RJR4	Uncharacterized protein	NUGGC	Nuclear GTPase SLIP-GC OS=Homo sapiens GN=NUGGC PE=2 SV=3	Protein Nuggc OS=Mus musculus GN=Nuggc PE=2 SV=1	91.209				1.10701	0.834008	1.04836	1.08886	0.820008	1.09808	0.770588	0.048402	0.753241	0.00242555	1.02303	0.494185
F1RJR9	Uncharacterized protein	PBK	Lymphokine-activated killer T-cell-originated protein kinase OS=Homo sapiens GN=PBK PE=1 SV=3	Lymphokine-activated killer T-cell-originated protein kinase OS=Mus musculus GN=Pbk PE=2 SV=1	30.913	1.19406	0.899149	0.914835	1.15768	0.91658	0.929126	1.02339	1.10291	0.87623	1.07295	0.418656	0.864747	0.145512	1.24077	0.0423894
F1RJS3	Bifunctional epoxide hydrolase 2	EPHX2			62.754							0.906566	1.24117	0.845203	1.46849		1.36909		1.0726
F1RJU3	Uncharacterized protein	DOCK5	Dedicator of cytokinesis protein 5 OS=Homo sapiens GN=DOCK5 PE=1 SV=3	Dedicator of cytokinesis protein 5 OS=Mus musculus GN=Dock5 PE=1 SV=2	210.85	1.09085	0.801639	1.08993	1.08094	0.795207	1.09553	1.08524	0.791843	1.12133	0.722359	0.000419395	0.733396	2.31946e-07	0.984951	0.222969
F1RJU7	Uncharacterized protein	SHROOM1	Protein Shroom1 OS=Homo sapiens GN=SHROOM1 PE=1 SV=1	Protein Shroom1 OS=Mus musculus GN=Shroom1 PE=1 SV=2	92.075	0.820178	1.30404	0.886227				0.991004	0.903394	1.10436	1.10894	0.693074	1.21878	0.495727	0.909872	0.586995
F1RJU9	Uncharacterized protein	SEPT8	Septin-8 OS=Homo sapiens GN=SEPT8 PE=1 SV=4	Septin-8 OS=Mus musculus GN=Sept8 PE=1 SV=4	50.121	1.02316	0.995391	0.983039	0.988857	1.07795	0.941471	0.979347	1.2181	0.801766	1.2073	0.0930023	1.10031	0.261371	1.09723	0.24486
F1RJV1	Kinesin-like protein	KIF3A			82.782	1.07448	0.891329	1.03133	0.98855	0.930703	1.0716	0.970779	0.912915	1.07773	0.859869	0.00164112	0.901489	0.0762033	0.953832	0.264524
F1RJV2	Uncharacterized protein	RAD50	DNA repair protein RAD50 OS=Homo sapiens GN=RAD50 PE=1 SV=1	DNA repair protein RAD50 OS=Mus musculus GN=Rad50 PE=4 SV=1	153.88	1.17354	0.687719	1.11464	1.14806	0.707155	1.10907	1.14924	0.724895	1.1379	0.63058	1.0576e-05	0.610736	8.7878e-06	1.03249	0.0399685
F1RJV5	Uncharacterized protein	PDLIM4	PDZ and LIM domain protein 4 OS=Homo sapiens GN=PDLIM4 PE=1 SV=2	PDZ and LIM domain protein 4 OS=Mus musculus GN=Pdlim4 PE=1 SV=3	38.233				0.986038	1.01549	0.999131				1.01637		1.02987		0.986896
F1RJV7	Uncharacterized protein	ACSL6	Long-chain-fatty-acid--CoA ligase 6 OS=Homo sapiens GN=ACSL6 PE=2 SV=4	Acyl-CoA synthetase long-chain family member 6 OS=Mus musculus GN=Acsl6 PE=2 SV=2	80.206	0.843507	1.10674	1.03552	0.853301	1.12958	1.02044	0.948578	0.924174	1.1223	0.994409	0.940052	1.19472	0.10069	0.832338	0.0184281
F1RJW5	Uncharacterized protein	IGSF8	Immunoglobulin superfamily member 8 OS=Homo sapiens GN=IGSF8 PE=1 SV=1	Immunoglobulin superfamily member 8 OS=Mus musculus GN=Igsf8 PE=1 SV=2	64.545
F1RJW8	Uncharacterized protein	DCAF8	DDB1- and CUL4-associated factor 8 OS=Homo sapiens GN=DCAF8 PE=1 SV=1	DDB1- and CUL4-associated factor 8 OS=Mus musculus GN=Dcaf8 PE=1 SV=1	66.653	1.09884	0.877138	1.02204	1.12293	0.831248	1.05804				0.821307	0.0271673	0.76893	0.0234703	1.06812	0.098138
F1RJX8	Coatomer subunit alpha	COPA			138.44	1.08182	0.879451	1.02801	1.04313	0.895032	1.03685	1.07293	0.803083	1.12193	0.80883	0.00798582	0.806022	0.00969563	1.00348	0.916667
F1RJY0	Uncharacterized protein	NCSTN	Nicastrin OS=Homo sapiens GN=NCSTN PE=1 SV=2	Nicastrin OS=Mus musculus GN=Ncstn PE=1 SV=3	78.643	0.78026	1.2972	0.99463	0.800123	1.07182	1.04701	0.829788	1.06216	1.09343	1.09445	0.328362	1.42362	0.0431921	0.768777	0.00505486
F1RJY3	Vang-like protein	VANGL2			65.116				1.03864	1.06659	0.905888				1.17739		1.02691		1.14654
F1RJZ4	Uncharacterized protein	GPALPP1	GPALPP motifs-containing protein 1 OS=Homo sapiens GN=GPALPP1 PE=1 SV=1	GPALPP motifs-containing protein 1 OS=Mus musculus GN=Gpalpp1 PE=1 SV=2	39.139	0.451044	2.03598	0.563639	0.694817	1.50204	0.836841	0.459973	2.04309	0.454511	3.0087	0.00703577	3.47552	0.00854941	0.865683	0.585635
F1RK00	Uncharacterized protein	ZC3H13	Zinc finger CCCH domain-containing protein 13 OS=Homo sapiens GN=ZC3H13 PE=1 SV=1	Protein Zc3h13 OS=Mus musculus GN=Zc3h13 PE=2 SV=1	182.22	0.907006	1.17565	0.894901	0.762951	1.37227	0.874265	0.791646	1.22913	0.953164	1.38743	0.0161278	1.53439	0.00499218	0.904226	0.178409
F1RK01	Uncharacterized protein	CPB2	Carboxypeptidase B2 OS=Homo sapiens GN=CPB2 PE=1 SV=2	Carboxypeptidase B2 OS=Mus musculus GN=Cpb2 PE=1 SV=1	48.874	1.24654	0.620736	1.1216							0.553439		0.497968		1.1114
F1RK02	Uncharacterized protein	LCP1	Plastin-2 OS=Homo sapiens GN=LCP1 PE=1 SV=6	Plastin-2 OS=Mus musculus GN=Lcp1 PE=1 SV=4	71.414	1.61932	0.286048	1.08966	1.12937	0.213716	1.54324	1.66983	0.373838	0.948693	0.243914	0.0307277	0.197714	0.0154874	1.23367	0.324944
F1RK06	Uncharacterized protein	LRCH1	Leucine-rich repeat and calponin homology domain-containing protein 1 OS=Homo sapiens GN=LRCH1 PE=1 SV=3	Leucine-rich repeat and calponin homology domain-containing protein 1 OS=Mus musculus GN=Lrch1 PE=1 SV=2	85.813	1.08991	0.793916	1.10635	1.19438	0.806483	0.992589				0.762479	0.139153	0.700609	0.0925619	1.08831	0.353737
F1RK10	Succinate-CoA ligase subunit beta	SUCLA2			50.304	0.932692	0.997016	1.06723	0.964959	1.04569	1.02239	0.950707	0.991617	1.05129	0.966067	0.180772	1.06529	0.0486451	0.90686	0.00519139
F1RK11	Uncharacterized protein	MED4	Mediator of RNA polymerase II transcription subunit 4 OS=Homo sapiens GN=MED4 PE=1 SV=1	Mediator of RNA polymerase II transcription subunit 4 OS=Mus musculus GN=Med4 PE=2 SV=1	28.263	1.02985	1.00443	1.00045	1.16607	0.785728	1.03683	1.21233	0.784622	1.02064	0.842005	0.155871	0.755455	0.042323	1.11457	0.162499
F1RK14	Uncharacterized protein	RB1	Retinoblastoma-associated protein OS=Homo sapiens GN=RB1 PE=1 SV=2	Retinoblastoma-associated protein OS=Mus musculus GN=Rb1 PE=1 SV=2	107.03	0.986035	1.16689	0.860069	1.0299	1.08241	0.899941	1.01889	1.07742	0.903343	1.24907	0.007262	1.09618	0.0607841	1.13948	0.00297352
F1RK19	Uncharacterized protein	PHF11	PHD finger protein 11 OS=Homo sapiens GN=PHF11 PE=1 SV=3	PHD finger protein 11 OS=Mus musculus GN=Phf11 PE=2 SV=1	34.206	1.21059	0.766872	1.02076	1.10853	0.850698	1.03224	1.1857	0.802987	1.02666	0.785983	0.0108768	0.690637	0.00097579	1.13805	0.0425063
F1RK23	Uncharacterized protein	---	Importin subunit alpha-4 OS=Homo sapiens GN=KPNA3 PE=1 SV=2	Importin subunit alpha-4 OS=Mus musculus GN=Kpna3 PE=1 SV=1	35.693	0.677865	1.57919	0.818393				0.956786	1.14831	0.858691	1.62633	0.245338	1.66855	0.187943	0.974698	0.904099
F1RK24	Uncharacterized protein	SPRYD7	SPRY domain-containing protein 7 OS=Homo sapiens GN=SPRYD7 PE=1 SV=2	SPRY domain-containing protein 7 OS=Mus musculus GN=Spryd7 PE=2 SV=2	21.653	1.01016	0.872461	1.10741	0.988169	0.926185	1.04618	0.914131	0.922586	1.09111	0.83867	0.00231437	0.934343	0.148526	0.897604	0.040985
F1RK31	Uncharacterized protein	INTS6	Integrator complex subunit 6 OS=Homo sapiens GN=INTS6 PE=1 SV=1	Integrator complex subunit 6 OS=Mus musculus GN=Ints6 PE=2 SV=1	99.067	1.08873	0.799086	1.1027	1.09575	0.850506	1.04412	1.01524	0.90704	1.07862	0.792647	0.0074485	0.799016	0.00670411	0.992028	0.796948
F1RK43	Uncharacterized protein	SLX4	Structure-specific endonuclease subunit SLX4 OS=Homo sapiens GN=SLX4 PE=1 SV=3	Structure-specific endonuclease subunit SLX4 OS=Mus musculus GN=Slx4 PE=1 SV=1	173.46	0.884603	1.15051	0.967798	1.11766	0.994472	0.897095				1.15019	0.293673	1.07128	0.667765	1.07366	0.660881
F1RK45	Uncharacterized protein	TRAP1	Heat shock protein 75 kDa, mitochondrial OS=Homo sapiens GN=TRAP1 PE=1 SV=3	Heat shock protein 75 kDa, mitochondrial OS=Mus musculus GN=Trap1 PE=1 SV=1	79.77	0.891486	1.2654	0.881014	0.939146	1.14327	0.923345	0.866796	1.22237	0.895541	1.34488	0.00745825	1.34611	0.0037164	0.999084	0.975241
F1RK46	Uncharacterized protein	CREBBP	CREB-binding protein OS=Homo sapiens GN=CREBBP PE=1 SV=3	CREB-binding protein OS=Mus musculus GN=Crebbp PE=2 SV=1	264.85	1.02029	0.977279	1.00224	0.973068	0.995787	1.02839	0.992242	0.960898	1.02105	0.961428	0.040065	0.982706	0.373714	0.978347	0.252284
F1RK53	Coronin	LOC100513346			99.988	1.35184	0.581391	1.0883				1.40943	0.515448	1.10872	0.499238	0.0247239	0.397223	0.00299085	1.25682	0.0422531
F1RK56	Uncharacterized protein	NMRAL1	NmrA-like family domain-containing protein 1 OS=Homo sapiens GN=NMRAL1 PE=1 SV=1	NmrA-like family domain-containing protein 1 OS=Mus musculus GN=Nmral1 PE=2 SV=1	33.097	0.728127	1.35247	0.926086	0.449022	1.99573	0.626645	1.09259	0.713065	1.20111	1.47476	0.367275	1.78931	0.246727	0.824207	0.553422
F1RK58	Uncharacterized protein	HMOX2	Heme oxygenase 2 OS=Homo sapiens GN=HMOX2 PE=1 SV=2	Heme oxygenase 2 OS=Mus musculus GN=Hmox2 PE=2 SV=1	35.726	0.871799	1.27944	0.867655	0.913471	1.15134	0.939393	0.898492	1.12209	0.988213	1.27103	0.0162178	1.32384	0.0213479	0.960112	0.40373
F1RK59	Uncharacterized protein	MRPL40	39S ribosomal protein L40, mitochondrial OS=Homo sapiens GN=MRPL40 PE=1 SV=1	39S ribosomal protein L40, mitochondrial OS=Mus musculus GN=Mrpl40 PE=2 SV=2	24.031	0.526139	2.03027	0.50348	0.619041	2.00656	0.476863	0.673219	1.73303	0.55144	3.76676	0.00314165	3.17304	0.00155931	1.18711	0.142586
F1RK61	Uncharacterized protein	UFD1L	Ubiquitin fusion degradation protein 1 homolog OS=Homo sapiens GN=UFD1L PE=1 SV=3	Ubiquitin fusion degradation protein 1 homolog OS=Mus musculus GN=Ufd1l PE=1 SV=2	34.454	0.895386	1.16465	0.945001	0.923469	1.15436	0.936581				1.23248	0.00114288	1.27499	0.0194409	0.966663	0.247339
F1RK64	Uncharacterized protein	HIRA	Protein HIRA OS=Homo sapiens GN=HIRA PE=1 SV=2	Protein HIRA OS=Mus musculus GN=Hira PE=1 SV=3	111.43	1.12046	0.848186	1.02876	1.08413	0.894103	1.01632	1.0043	0.98483	1.01117	0.892309	0.109515	0.849862	0.0395858	1.04995	0.275
F1RK74	Uncharacterized protein	SLC25A1	Tricarboxylate transport protein, mitochondrial OS=Homo sapiens GN=SLC25A1 PE=1 SV=2	Protein Slc25a1 OS=Mus musculus GN=Slc25a1 PE=2 SV=1	33.702	0.806482	1.19696	0.915332	0.893031	1.29937	0.823996	0.944047	1.06055	0.985923	1.30516	0.0356927	1.34549	0.0282802	0.970024	0.682371
F1RK78	Uncharacterized protein	DGCR14	Protein DGCR14 OS=Homo sapiens GN=DGCR14 PE=1 SV=1	Expressed sequence 2 embryonic lethal, isoform CRA_a OS=Mus musculus GN=Dgcr14 PE=2 SV=1	52.593							0.917357	1.17072	0.90548	1.29293		1.27619		1.01312
F1RK84	Kelch-like family member 22	LOC100156352			71.6				1.07758	0.92807	0.992368				0.935207		0.861257		1.08586
F1RK85	Uncharacterized protein	MED15	Mediator of RNA polymerase II transcription subunit 15 OS=Homo sapiens GN=MED15 PE=1 SV=2	Mediator of RNA polymerase II transcription subunit 15 OS=Mus musculus GN=Med15 PE=2 SV=1	77.885	1.02217	0.933352	1.05606	1.13099	0.830597	1.02416	0.961611	1.09323	0.936742	0.947041	0.574941	0.9173	0.407335	1.03242	0.624277
F1RK87	Uncharacterized protein	MGRN1	E3 ubiquitin-protein ligase MGRN1 OS=Homo sapiens GN=MGRN1 PE=1 SV=2	E3 ubiquitin-protein ligase MGRN1 OS=Mus musculus GN=Mgrn1 PE=1 SV=2	60.062	1.01286	0.986114	1.00094	0.970838	1.27106	0.787685				1.26196	0.327351	1.13786	0.511157	1.10906	0.525509
F1RK92	Uncharacterized protein	NAGPA	N-acetylglucosamine-1-phosphodiester alpha-N-acetylglucosaminidase OS=Homo sapiens GN=NAGPA PE=1 SV=2	N-acetylglucosamine-1-phosphodiester alpha-N-acetylglucosaminidase OS=Mus musculus GN=Nagpa PE=2 SV=2	61.163				0.980658	0.88747	1.13603				0.781202		0.904974		0.863231
F1RK95	Uncharacterized protein	SMPD4	Sphingomyelin phosphodiesterase 4 OS=Homo sapiens GN=SMPD4 PE=1 SV=2	Sphingomyelin phosphodiesterase 4 OS=Mus musculus GN=Smpd4 PE=2 SV=2	97.78	0.994695	0.954899	1.00197	1.05733	0.965146	0.978216	0.981212	0.953769	1.0795	0.939251	0.178417	0.94744	0.148692	0.991357	0.831016
F1RK97	Uncharacterized protein	LOC100153925	Mitotic-spindle organizing protein 2B OS=Homo sapiens GN=MZT2B PE=1 SV=1	Mitotic-spindle organizing protein 2 OS=Mus musculus GN=Mzt2 PE=1 SV=1	15.9	1.01608	1.06858	0.922546	1.02752	0.99508	0.97913	0.957603	1.09909	0.940058	1.11296	0.0536236	1.05383	0.234254	1.05612	0.128487
F1RK98	Tubulin alpha chain	LOC100155138			49.959	1.25368	0.805026	0.946441							0.850582		0.642128		1.32463
F1RKA3	Uncharacterized protein	LZTR1	Leucine-zipper-like transcriptional regulator 1 OS=Homo sapiens GN=LZTR1 PE=1 SV=2	Leucine-zipper-like transcriptional regulator 1 OS=Mus musculus GN=Lztr1 PE=2 SV=2	94.544							1.11464	0.786869	1.10754	0.710468		0.705941		1.00641
F1RKB2	Uncharacterized protein	DDX54	ATP-dependent RNA helicase DDX54 OS=Homo sapiens GN=DDX54 PE=1 SV=2	ATP-dependent RNA helicase DDX54 OS=Mus musculus GN=Ddx54 PE=1 SV=1	79.565	1.1816	0.612578	1.18843	1.25693	0.789832	0.949982				0.655817	0.141809	0.575104	0.071384	1.14035	0.415824
F1RKB5	Uncharacterized protein	LOC100512219	Nuclear envelope pore membrane protein POM 121C OS=Homo sapiens GN=POM121C PE=1 SV=2	Nuclear envelope pore membrane protein POM 121 OS=Mus musculus GN=Pom121 PE=1 SV=2	124.03	1.01493	0.843342	1.12969	1.1136	0.874964	1.0062	1.13859	0.849399	1.02345	0.812735	0.0300719	0.785923	0.0198801	1.03412	0.542242
F1RKB6	Uncharacterized protein	NSUN5	Putative methyltransferase NSUN5 OS=Homo sapiens GN=NSUN5 PE=1 SV=2	Putative methyltransferase NSUN5 OS=Mus musculus GN=Nsun5 PE=2 SV=2	50.591							1.27048	0.685433	1.06631	0.642809		0.539506		1.19148
F1RKC0	Uncharacterized protein	HIP1	Huntingtin-interacting protein 1 OS=Homo sapiens GN=HIP1 PE=1 SV=5	Huntingtin-interacting protein 1 OS=Mus musculus GN=Hip1 PE=1 SV=2	112.06	1.18629	0.799876	0.968578	1.10948	0.80796	1.02713	1.0926	0.924718	0.977755	0.851718	0.0502596	0.747425	0.00610493	1.13954	0.0215377
F1RKD1	Uncharacterized protein	RBM19	Probable RNA-binding protein 19 OS=Homo sapiens GN=RBM19 PE=1 SV=3	Probable RNA-binding protein 19 OS=Mus musculus GN=Rbm19 PE=1 SV=1	107.54	1.07863	0.887503	1.03265	1.08807	0.880377	1.02986	1.09603	0.887583	1.04785	0.853748	0.000280107	0.813878	6.70481e-05	1.04899	0.00260311
F1RKE4	Uncharacterized protein	LOC100738785	DNA-directed RNA polymerase II subunit RPB11-a OS=Homo sapiens GN=POLR2J PE=1 SV=1	DNA-directed RNA polymerase II subunit RPB11 OS=Mus musculus GN=Polr2j PE=4 SV=1	11.412	1.07297	0.974964	0.982114	0.983542	0.969081	1.04234	1.05995	0.897402	1.06611	0.919395	0.0783381	0.911754	0.0712077	1.00838	0.829132
F1RKE7	Uncharacterized protein	FBXW8	F-box/WD repeat-containing protein 8 OS=Homo sapiens GN=FBXW8 PE=1 SV=2	F-box/WD repeat-containing protein 8 OS=Mus musculus GN=Fbxw8 PE=1 SV=2	67.243	1.1376	0.770138	1.0845	1.08046	0.873796	1.03759	1.10562	0.826749	1.07608	0.772532	0.00609745	0.743357	0.00317281	1.03925	0.130645
F1RKE8	Uncharacterized protein	TESC	Calcineurin B homologous protein 3 OS=Homo sapiens GN=TESC PE=1 SV=3	Calcineurin B homologous protein 3 OS=Mus musculus GN=Tesc PE=1 SV=2	24.705	1.13871	0.829776	1.02892	1.09692	0.91168	1.01205	1.0512	0.967817	1.00345	0.889914	0.103559	0.824279	0.0214564	1.07963	0.0751644
F1RKF3	Uncharacterized protein	---	Leucine-rich repeat and WD repeat-containing protein 1 OS=Homo sapiens GN=LRWD1 PE=1 SV=2	Leucine-rich repeat and WD repeat-containing protein 1 OS=Mus musculus GN=LRWD1 PE=2 SV=1	71.55	1.07772	0.943549	0.974335	1.06853	1.05518	0.888565	1.03142	0.969828	0.968997	1.04826	0.357568	0.934196	0.163283	1.1221	0.0347536
F1RKF6	Uncharacterized protein	PRKRIP1	PRKR-interacting protein 1 OS=Homo sapiens GN=PRKRIP1 PE=1 SV=1	PRKR-interacting protein 1 OS=Mus musculus GN=Prkrip1 PE=1 SV=2	21.561	1.01994	1.05256	0.933675							1.12733		1.03198		1.0924
F1RKF7	Uncharacterized protein	LOC106504093	Protein CASP OS=Homo sapiens GN=CUX1 PE=1 SV=2	Homeobox protein cut-like 1 OS=Mus musculus GN=Cux1 PE=2 SV=1	29.387
F1RKF9	Uncharacterized protein	CUX1	Homeobox protein cut-like 1 OS=Homo sapiens GN=CUX1 PE=1 SV=3	Homeobox protein cut-like 1 OS=Mus musculus GN=Cux1 PE=2 SV=1	122.75	0.801221	1.3951	0.811028	0.82308	1.36041	0.827435	0.796483	1.41492	0.798585	1.71126	6.25434e-05	1.72276	6.55962e-05	0.993327	0.667212
F1RKG2	Uncharacterized protein	IFT22	Intraflagellar transport protein 22 homolog OS=Homo sapiens GN=IFT22 PE=2 SV=1	Rab-like protein 5 OS=Mus musculus GN=Rabl5 PE=2 SV=1	20.905				1.04657	0.989491	0.966607	0.963815	0.960214	1.07262	0.956102	0.550007	0.969817	0.595383	0.985858	0.851117
F1RKG3	Uncharacterized protein	RFC5	Replication factor C subunit 5 OS=Homo sapiens GN=RFC5 PE=1 SV=1	Replication factor C subunit 5 OS=Mus musculus GN=Rfc5 PE=2 SV=1	40.062	1.04192	0.892721	1.03433	1.09556	0.891656	1.008	0.97721	1.07421	0.956945	0.953093	0.529829	0.917775	0.303911	1.03848	0.409272
F1RKG8	Uncharacterized protein	PEBP1	Phosphatidylethanolamine-binding protein 1 OS=Homo sapiens GN=PEBP1 PE=1 SV=3	Phosphatidylethanolamine-binding protein 1 OS=Mus musculus GN=Pebp1 PE=1 SV=3	20.971	0.505933	1.97003	0.575906	0.565492	1.70131	0.777634	0.618801	1.72208	0.608857	2.74838	0.000689526	3.19095	0.00194933	0.861307	0.28792
F1RKG9	Uncharacterized protein	TAOK3	Serine/threonine-protein kinase TAO3 OS=Homo sapiens GN=TAOK3 PE=1 SV=2	Serine/threonine-protein kinase TAO3 OS=Mus musculus GN=Taok3 PE=1 SV=2	105.53	0.83331	1.0711	1.08736	1.07292	0.935456	0.990122				0.965859	0.715915	1.05263	0.758387	0.917567	0.604329
F1RKH0	Uncharacterized protein	SUDS3	Sin3 histone deacetylase corepressor complex component SDS3 OS=Homo sapiens GN=SUDS3 PE=1 SV=2	Sin3 histone deacetylase corepressor complex component SDS3 OS=Mus musculus GN=Suds3 PE=1 SV=1	37.936	0.989812	0.963557	1.04926	1.03055	0.910718	1.05075	1.02427	1.00069	0.977171	0.934284	0.132012	0.944273	0.149789	0.989421	0.718337
F1RKI0	Uncharacterized protein	RAPGEF6	Rap guanine nucleotide exchange factor 6 OS=Homo sapiens GN=RAPGEF6 PE=1 SV=2	Protein Rapgef6 OS=Mus musculus GN=Rapgef6 PE=2 SV=1	163.74	1.09387	0.959457	0.951268	0.87584	1.15398	0.977945	0.961496	1.05721	0.978186	1.09055	0.256905	1.08169	0.400139	1.00819	0.91234
F1RKI3	Uncharacterized protein	HINT1	Histidine triad nucleotide-binding protein 1 OS=Homo sapiens GN=HINT1 PE=1 SV=2	Histidine triad nucleotide-binding protein 1 OS=Mus musculus GN=Hint1 PE=1 SV=3	13.725	1.11368	0.921463	0.986642	1.08308	0.86521	1.04625	1.05526	0.946372	1.02177	0.894712	0.0262271	0.840413	0.00578318	1.06461	0.0528801
F1RKI9	Uncharacterized protein	PSMD8	26S proteasome non-ATPase regulatory subunit 8 OS=Homo sapiens GN=PSMD8 PE=1 SV=2	26S proteasome non-ATPase regulatory subunit 8 OS=Mus musculus GN=Psmd8 PE=2 SV=2	39.732	1.16216	0.704258	1.11	1.12951	0.6274	1.24186	1.05837	0.830099	1.16847	0.614077	0.00503733	0.645293	0.00945803	0.951626	0.313256
F1RKJ4	Uncharacterized protein	YIF1B	Protein YIF1B OS=Homo sapiens GN=YIF1B PE=1 SV=1	Protein YIF1B OS=Mus musculus GN=Yif1b PE=1 SV=2	34.327	0.972626	1.04567	0.983246	0.851298	1.22256	0.939952				1.1794	0.288198	1.2436	0.190416	0.948381	0.559857
F1RKJ9	Uncharacterized protein	ISOC1	Isochorismatase domain-containing protein 1 OS=Homo sapiens GN=ISOC1 PE=1 SV=3	Isochorismatase domain-containing protein 1 OS=Mus musculus GN=Isoc1 PE=2 SV=1	32.104	0.738916	1.39665	0.875799	0.843314	1.28076	0.895948				1.51116	0.073574	1.69217	0.0202568	0.893033	0.312261
F1RKK5	Uncharacterized protein	PRRC1	Protein PRRC1 OS=Homo sapiens GN=PRRC1 PE=1 SV=1	Protein PRRC1 OS=Mus musculus GN=Prrc1 PE=2 SV=1	44.203	0.678257	1.36334	0.961734	0.884384	1.15199	1.02037	0.764026	1.19775	1.02834	1.2334	0.0559692	1.59588	0.00630778	0.772866	0.0497553
F1RKM0	Uncharacterized protein	LMNB1	Lamin-B1 OS=Homo sapiens GN=LMNB1 PE=1 SV=2	Lamin-B1 OS=Mus musculus GN=Lmnb1 PE=1 SV=3	66.485	0.932791	1.11853	0.914734	0.960171	1.10522	0.881781	0.95084	1.05141	0.921428	1.20502	0.00325821	1.15169	0.0111974	1.04631	0.0545275
F1RKM1	Uncharacterized protein	ALDH7A1	Alpha-aminoadipic semialdehyde dehydrogenase OS=Homo sapiens GN=ALDH7A1 PE=1 SV=5	Alpha-aminoadipic semialdehyde dehydrogenase OS=Mus musculus GN=Aldh7a1 PE=1 SV=4	47.071	0.986766	1.01513	0.984306	1.04948	0.930469	0.992543	0.980773	1.02859	0.999689	0.999209	0.982039	0.985802	0.726424	1.0136	0.604265
F1RKN9	Uncharacterized protein	CEP120	Centrosomal protein of 120 kDa OS=Homo sapiens GN=CEP120 PE=2 SV=2	Centrosomal protein of 120 kDa OS=Mus musculus GN=Cep120 PE=1 SV=1	113.31	1.05796	0.846447	1.08245	1.10822	0.876271	1.00997	0.973794	0.933907	1.09107	0.834499	0.00844039	0.846065	0.0332918	0.986329	0.774814
F1RKP8	Uncharacterized protein	ZNF568	Zinc finger protein 568 OS=Homo sapiens GN=ZNF568 PE=2 SV=2	Zinc finger protein 569 OS=Mus musculus GN=Znf569 PE=2 SV=2	74.776	0.979352	0.983998	1.03352							0.952083		1.00474		0.947588
F1RKQ4	Triokinase/FMN cyclase	TKFC			59.234	1.17713	0.888861	0.970689	1.0784	0.861437	1.0419	1.05735	1.01308	0.943075	0.934943	0.320817	0.834132	0.0396045	1.12086	0.0683198
F1RKQ8	Uncharacterized protein	CPSF7	Cleavage and polyadenylation specificity factor subunit 7 OS=Homo sapiens GN=CPSF7 PE=1 SV=1	Cleavage and polyadenylation specificity factor subunit 7 OS=Mus musculus GN=Cpsf7 PE=1 SV=2	51.139	1.00505	1.08142	0.908932	1.0034	0.997951	0.95584	1.01104	0.980952	0.989212	1.0723	0.156626	1.01352	0.704248	1.05799	0.139989
F1RKQ9	Succinate dehydrogenase assembly factor 2, mitochondrial	SDHAF2			19.597	0.779707	1.3063	0.921164	0.923709	1.32458	0.783658				1.5432	0.089106	1.54448	0.0936613	0.999175	0.995006
F1RKS3	Flap endonuclease 1	FEN1			42.402	1.23564	0.570071	1.15621							0.493051		0.461357		1.0687
F1RKS7	Uncharacterized protein	FADS2	Fatty acid desaturase 2 OS=Homo sapiens GN=FADS2 PE=1 SV=1	Fatty acid desaturase 2 OS=Mus musculus GN=Fads2 PE=2 SV=1	52.286	0.663026	1.61959	0.741199	0.71214	1.59516	0.74739	0.962274	1.07542	0.959351	1.75257	0.0586441	1.83542	0.0471008	0.95486	0.769882
F1RKT6	Uncharacterized protein	SH2D7	SH2 domain-containing protein 7 OS=Homo sapiens GN=SH2D7 PE=4 SV=2	SH2 domain-containing protein 7 OS=Mus musculus GN=Sh2d7 PE=2 SV=2	49.243	0.792308	1.48317	0.747812							1.98335		1.87196		1.0595
F1RKU0	Isocitrate dehydrogenase [NAD] subunit, mitochondrial	IDH3A			39.631	0.899259	1.08603	0.994383	0.924399	1.12043	0.990781	0.887785	1.09884	1.00804	1.10427	0.00265879	1.21902	0.000184568	0.905865	0.00494752
F1RKU1	Uncharacterized protein	ACSBG1	Long-chain-fatty-acid--CoA ligase ACSBG1 OS=Homo sapiens GN=ACSBG1 PE=1 SV=2	Long-chain-fatty-acid--CoA ligase ACSBG1 OS=Mus musculus GN=Acsbg1 PE=1 SV=1	72.703	1.00307	1.12826	0.890039	0.923877	1.19454	0.905934	0.906862	1.15445	0.931255	1.27501	0.000958944	1.22706	0.00602048	1.03908	0.357496
F1RKU4	Uncharacterized protein	WDR61	WD repeat-containing protein 61 OS=Homo sapiens GN=WDR61 PE=1 SV=1	WD repeat-containing protein 61 OS=Mus musculus GN=Wdr61 PE=2 SV=1	31.752	1.07451	0.798771	1.10793	1.10962	0.713481	1.13987	1.0305	0.85973	1.11179	0.706034	0.0125807	0.737872	0.00940139	0.956852	0.157272
F1RKV6	Uncharacterized protein	SUZ12	Polycomb protein SUZ12 OS=Homo sapiens GN=SUZ12 PE=1 SV=3	Polycomb protein Suz12 OS=Mus musculus GN=Suz12 PE=1 SV=2	82.728	0.80722	1.1644	1.02584	1.02842	1.09989	0.885885	0.717913	1.62945	0.630874	1.5314	0.0990227	1.52483	0.0975716	1.00431	0.981549
F1RKV7	Cytokine receptor-like factor 3	CRLF3			49.107	1.19301	0.611021	1.10948	1.14733	0.649359	1.23958	1.13725	0.786404	1.10353	0.592824	0.00279765	0.588564	0.00741771	1.00724	0.873832
F1RKW3	Uncharacterized protein	RNF135	E3 ubiquitin-protein ligase RNF135 OS=Homo sapiens GN=RNF135 PE=1 SV=2	E3 ubiquitin-protein ligase RNF135 OS=Mus musculus GN=Rnf135 PE=2 SV=1	46.763	1.04301	0.8463	1.1013							0.768453		0.811398		0.947073
F1RKW4	Mitochondrial Rho GTPase	RHOT1			71.203	0.974225	0.971331	1.0498	0.865666	1.18173	0.931575	1.02304	0.954646	1.01063	1.03867	0.667674	1.0855	0.408338	0.956861	0.502967
F1RKW6	Uncharacterized protein	C17orf75	Protein Njmu-R1 OS=Homo sapiens GN=C17orf75 PE=1 SV=2	Protein 5730455P16Rik OS=Mus musculus GN=5730455P16Rik PE=2 SV=1	44.418	1.02012	0.81369	1.09244	1.01893	0.76295	1.1917	1.07908	0.8076	1.11935	0.700528	0.0018674	0.76464	0.000815747	0.916155	0.0645646
F1RKW7	Uncharacterized protein	ZNF207	BUB3-interacting and GLEBS motif-containing protein ZNF207 OS=Homo sapiens GN=ZNF207 PE=1 SV=1	Protein Zfp207 OS=Mus musculus GN=Zfp207 PE=2 SV=1	49.779	0.878622	1.1451	0.978216	0.830208	1.47013	0.778225	0.799326	1.36293	0.821865	1.54293	0.0204463	1.58609	0.0302631	0.972792	0.746371
F1RKW8	Uncharacterized protein	PSMD11	26S proteasome non-ATPase regulatory subunit 11 OS=Homo sapiens GN=PSMD11 PE=1 SV=3	26S proteasome non-ATPase regulatory subunit 11 OS=Mus musculus GN=Psmd11 PE=1 SV=3	44.238	1.1572	0.639211	1.14996	1.12236	0.691035	1.17558	1.12343	0.76497	1.13101	0.606157	0.00303833	0.615699	0.00387199	0.984502	0.359879
F1RKW9	Uncharacterized protein	MYO1D	Unconventional myosin-Id OS=Homo sapiens GN=MYO1D PE=1 SV=2	Unconventional myosin-Id OS=Mus musculus GN=Myo1d PE=1 SV=1	110.35	1.13095	0.857548	0.991952	1.03528	1.01672	0.952938	1.06106	0.891591	1.04703	0.924443	0.263896	0.857021	0.0655961	1.07867	0.118222
F1RKX2	Uncharacterized protein	ALG1	Chitobiosyldiphosphodolichol beta-mannosyltransferase OS=Homo sapiens GN=ALG1 PE=1 SV=2	Chitobiosyldiphosphodolichol beta-mannosyltransferase OS=Mus musculus GN=Alg1 PE=2 SV=3	52.702
F1RKX4	Uncharacterized protein	---	RNA binding protein fox-1 homolog 1 OS=Homo sapiens GN=RBFOX1 PE=1 SV=2	RNA binding protein fox-1 homolog 1 OS=Mus musculus GN=Rbfox1 PE=1 SV=3	25.47	1.0881	0.737533	1.14073	1.08664	0.785832	1.14452	1.12341	0.768154	1.11816	0.673301	0.000115706	0.694789	6.55442e-05	0.969073	0.0821095
F1RKX6	Uncharacterized protein	TMEM114	Transmembrane protein 114 OS=Homo sapiens GN=TMEM114 PE=2 SV=2	Transmembrane protein 114 OS=Mus musculus GN=Tmem114 PE=1 SV=1	24.069	0.627313	1.82525	0.585681							3.11645		2.90963		1.07108
F1RKX9	Uncharacterized protein	CRKL	Crk-like protein OS=Homo sapiens GN=CRKL PE=1 SV=1	Crk-like protein OS=Mus musculus GN=Crkl PE=1 SV=2	33.796	1.15485	0.757395	1.08979	1.1368	0.755331	1.09045	1.14536	0.801748	1.06469	0.713258	0.00028883	0.673398	0.000585747	1.05919	0.00554116
F1RKY1	Uncharacterized protein	SNAP29	Synaptosomal-associated protein 29 OS=Homo sapiens GN=SNAP29 PE=1 SV=1	Synaptosomal-associated protein 29 OS=Mus musculus GN=Snap29 PE=2 SV=1	28.683	1.03193	0.920361	1.04368	0.881876	1.05308	1.06139	1.06187	0.835273	1.10044	0.876214	0.165309	0.943894	0.546071	0.928297	0.300995
F1RKY3	Uncharacterized protein	PI4KA	Phosphatidylinositol 4-kinase alpha OS=Homo sapiens GN=PI4KA PE=1 SV=3	Protein Pi4ka OS=Mus musculus GN=Pi4ka PE=4 SV=1	235.44	0.971202	0.94743	1.07443	0.989995	0.943814	1.07132	1.02177	0.874914	1.10464	0.851023	0.0103721	0.927318	0.0718549	0.917725	0.0102269
F1RKY8	Phosphomannomutase	---			15.573	1.23984	0.508601	1.22904	1.15448	0.660645	1.15774	1.03693	0.793495	1.17184	0.551544	0.0177495	0.572017	0.0107681	0.964209	0.554998
F1RKZ6	Uncharacterized protein	USP7	Ubiquitin carboxyl-terminal hydrolase 7 OS=Homo sapiens GN=USP7 PE=1 SV=2	Ubiquitin carboxyl-terminal hydrolase OS=Mus musculus GN=Usp7 PE=2 SV=1	128.5	1.20013	0.617837	1.15761				1.1317	0.702406	1.17048	0.567093	0.0485412	0.566183	0.013001	1.00161	0.965366
F1RL00	Uncharacterized protein	PPIL2	Peptidyl-prolyl cis-trans isomerase-like 2 OS=Homo sapiens GN=PPIL2 PE=1 SV=1	Peptidyl-prolyl cis-trans isomerase-like 2 OS=Mus musculus GN=Ppil2 PE=2 SV=2	58.758	1.10991	0.763431	1.11596	1.09236	0.869276	0.988593	1.10248	0.844894	1.06689	0.781223	0.00964874	0.749708	0.0116372	1.04204	0.353311
F1RL02	Mitogen-activated protein kinase	MAPK1			37.973	1.04732	0.870929	1.05629				0.950292	0.956635	1.04693	0.868937	0.188302	0.914873	0.321146	0.949789	0.471961
F1RL05	DNA topoisomerase	TOP3B			96.361	1.05873	0.907099	1.05827	0.981706	0.973823	0.974776	1.09811	0.852522	1.07902	0.878336	0.0567211	0.87093	0.0510404	1.0085	0.859497
F1RL25	Uncharacterized protein	LOC100518656	Thioredoxin domain-containing protein 11 OS=Homo sapiens GN=TXNDC11 PE=1 SV=2	Thioredoxin domain-containing protein 11 OS=Mus musculus GN=Txndc11 PE=2 SV=1	60.669
F1RL26	Uncharacterized protein	ZC3H7A	Zinc finger CCCH domain-containing protein 7A OS=Homo sapiens GN=ZC3H7A PE=1 SV=1	Protein Zc3h7a OS=Mus musculus GN=Zc3h7a PE=2 SV=1	110.08	1.06943	0.809457	1.11086	1.09797	0.875686	1.01988	1.01115	0.839063	1.15001	0.7694	0.0105765	0.794135	0.00314966	0.968853	0.508014
F1RL38	Uncharacterized protein	DDT	D-dopachrome decarboxylase OS=Homo sapiens GN=DDT PE=1 SV=3	D-dopachrome decarboxylase OS=Mus musculus GN=Ddt PE=1 SV=3	12.888	0.410961	2.13352	0.501439	0.308847	2.2501	0.53872	0.425786	2.13436	0.432992	4.42452	7.09401e-06	5.68961	4.83695e-06	0.777649	0.0874748
F1RL39	Uncharacterized protein	CABIN1	Calcineurin-binding protein cabin-1 OS=Homo sapiens GN=CABIN1 PE=1 SV=1	Calcineurin binding protein 1, isoform CRA_a OS=Mus musculus GN=Cabin1 PE=4 SV=1	241.99	0.982463	0.931555	1.07866	1.05586	0.99591	0.952435	1.09167	0.889392	1.02645	0.921282	0.171642	0.899954	0.0795984	1.0237	0.646515
F1RL66	Uncharacterized protein	TCOF1	Treacle protein OS=Homo sapiens GN=TCOF1 PE=1 SV=3	Tcof1 protein OS=Mus musculus GN=Tcof1 PE=2 SV=1	136.8	0.657582	1.7092	0.702603	0.750283	1.59451	0.699806	0.717776	1.57936	0.681252	2.34351	0.00152111	2.29722	0.000131105	1.02015	0.661692
F1RL80	Branched-chain-amino-acid aminotransferase	BCAT2			44.585	0.952869	0.987343	1.06497	0.931372	1.06839	0.999821	0.891633	1.03125	1.08991	0.978534	0.561465	1.11208	0.0273438	0.879915	0.0225261
F1RL81	Uncharacterized protein	HSD17B14	17-beta-hydroxysteroid dehydrogenase 14 OS=Homo sapiens GN=HSD17B14 PE=1 SV=1	Protein Hsd17b14 OS=Mus musculus GN=Hsd17b14 PE=2 SV=1	28.287	1.17309	0.518981	1.30173	1.25592	0.51603	1.2096	1.28532	0.582562	1.2045	0.43532	0.000124353	0.435496	0.000181992	0.999596	0.991865
F1RL82	Uncharacterized protein	PLEKHA4	Pleckstrin homology domain-containing family A member 4 OS=Homo sapiens GN=PLEKHA4 PE=1 SV=2	Pleckstrin homology domain-containing family A member 4 OS=Mus musculus GN=Plekha4 PE=4 SV=1	85.686
F1RL83	Uncharacterized protein	CYTH2	Cytohesin-2 OS=Homo sapiens GN=CYTH2 PE=1 SV=2	Cytohesin 2 OS=Mus musculus GN=Cyth2 PE=2 SV=1	46.489
F1RL85	Uncharacterized protein	GRWD1	Glutamate-rich WD repeat-containing protein 1 OS=Homo sapiens GN=GRWD1 PE=1 SV=1	Glutamate-rich WD repeat-containing protein 1 OS=Mus musculus GN=Grwd1 PE=2 SV=2	49.25	0.73191	1.38419	0.8614	0.773463	1.45636	0.83061	0.857876	1.1883	0.931101	1.53591	0.0181546	1.70479	0.00973516	0.900934	0.145691
F1RL93	Uncharacterized protein	PCYOX1L	Prenylcysteine oxidase-like OS=Homo sapiens GN=PCYOX1L PE=1 SV=2	Prenylcysteine oxidase-like OS=Mus musculus GN=Pcyox1l PE=2 SV=1	54.297	0.858288	1.15342	0.961608	0.813956	1.22385	0.918703	0.950341	1.01666	1.0527	1.15715	0.112918	1.29412	0.030705	0.894162	0.140161
F1RL99	DNA ligase	LIG1			100.76	1.09416	1.01587	0.904765	1.01299	1.01603	0.911512	1.01483	1.12606	0.829148	1.19374	0.0231542	1.01153	0.805899	1.18014	0.0134174
F1RLB1	Uncharacterized protein	FBXO38	F-box only protein 38 OS=Homo sapiens GN=FBXO38 PE=1 SV=3	F-box only protein 38 OS=Mus musculus GN=Fbxo38 PE=1 SV=1	133.21	0.840336	1.2151	0.949174							1.28017		1.44597		0.885334
F1RLB6	Uncharacterized protein	NAPA	Alpha-soluble NSF attachment protein OS=Homo sapiens GN=NAPA PE=1 SV=3	Alpha-soluble NSF attachment protein OS=Mus musculus GN=Napa PE=1 SV=1	33.291	0.944044	1.12213	0.92538	0.93108	1.11933	0.950828	0.940115	1.08789	0.972202	1.16884	0.000941504	1.18262	0.00176728	0.988355	0.504171
F1RLD6	Uncharacterized protein	ZNF260	Zinc finger protein 260 OS=Homo sapiens GN=ZNF260 PE=2 SV=3	Zinc finger protein 260 OS=Mus musculus GN=Znf260 PE=1 SV=1	46.772	1.13411	0.697497	1.15416	1.57912	0.546807	0.869158	1.28776	0.470367	1.2646	0.521505	0.0276834	0.428562	0.0140653	1.21687	0.248453
F1RLD9	Uncharacterized protein	SDHAF1	Succinate dehydrogenase assembly factor 1, mitochondrial OS=Homo sapiens GN=SDHAF1 PE=1 SV=1	Succinate dehydrogenase assembly factor 1, mitochondrial OS=Mus musculus GN=Sdhaf1 PE=3 SV=1	12.936
F1RLE1	Uncharacterized protein	COMMD10	COMM domain-containing protein 10 OS=Homo sapiens GN=COMMD10 PE=1 SV=1	COMM domain-containing protein 10 OS=Mus musculus GN=Commd10 PE=2 SV=1	22.932	1.10699	0.813741	1.0726				1.03045	0.843129	1.12835	0.752798	0.0286357	0.775164	0.0695669	0.971147	0.577106
F1RLE5	Uncharacterized protein	TMED7	Transmembrane emp24 domain-containing protein 7 OS=Homo sapiens GN=TMED7 PE=1 SV=2	Protein Tmed7 OS=Mus musculus GN=Tmed7 PE=2 SV=1	25.35	0.99789	0.876219	1.13577	1.008	0.876388	1.12112	0.98091	0.833126	1.14039	0.761118	0.000853087	0.865719	0.00340654	0.879174	0.000258199
F1RLE9	Uncharacterized protein	TRIM36	E3 ubiquitin-protein ligase TRIM36 OS=Homo sapiens GN=TRIM36 PE=2 SV=2	E3 ubiquitin-protein ligase Trim36 OS=Mus musculus GN=Trim36 PE=2 SV=1	81.718	1.27284	0.590296	1.1254	1.22043	0.547506	1.19711				0.489902	0.0105595	0.45635	0.00297658	1.07352	0.206028
F1RLG0	Uncharacterized protein	YTHDC2	Probable ATP-dependent RNA helicase YTHDC2 OS=Homo sapiens GN=YTHDC2 PE=1 SV=2	Probable ATP-dependent RNA helicase YTHDC2 OS=Mus musculus GN=Ythdc2 PE=1 SV=1	129.47	1.16506	0.848463	0.98773							0.859003		0.728256		1.17953
F1RLG3	Uncharacterized protein	APC	Adenomatous polyposis coli protein OS=Homo sapiens GN=APC PE=1 SV=2	Adenomatosis polyposis coli OS=Mus musculus GN=Apc PE=2 SV=1	194.35	1.01291	0.924972	1.05684							0.875223		0.913178		0.958436
F1RLG4	Uncharacterized protein	SRP19	Signal recognition particle 19 kDa protein OS=Homo sapiens GN=SRP19 PE=1 SV=3	Signal recognition particle 19 kDa protein OS=Mus musculus GN=Srp19 PE=2 SV=1	16.156	1.05491	0.731017	1.19591	1.23089	0.763999	0.996609	1.13005	0.692283	1.18762	0.647103	0.0181919	0.640338	0.0076472	1.01056	0.892875
F1RLG5	Receptor expression-enhancing protein	REEP5			21.401	0.558827	2.00335	0.496371	0.585818	1.88207	0.67964	1.16028	0.725962	1.12652	2.00275	0.190519	2.00066	0.191182	1.00104	0.997787
F1RLH7	Uncharacterized protein	COX6B	Cytochrome c oxidase subunit 6B1 OS=Homo sapiens GN=COX6B1 PE=1 SV=2	Cytochrome c oxidase subunit 6B1 OS=Mus musculus GN=Cox6b1 PE=1 SV=2	10.156	0.721913	1.38016	0.927257	0.778976	1.36266	0.896778	0.771033	1.24771	1.00696	1.40959	0.00228469	1.75646	0.00171262	0.802517	0.0145044
F1RLI4	Uncharacterized protein	WDR36	WD repeat-containing protein 36 OS=Homo sapiens GN=WDR36 PE=1 SV=1	Protein Wdr36 OS=Mus musculus GN=Wdr36 PE=2 SV=1	105.65				1.11069	0.887129	0.998141	1.01968	1.01705	0.965066	0.969935	0.729157	0.893827	0.303289	1.08515	0.293678
F1RLI6	Solute carrier family 25, member 46	SLC25A46			46.053	0.94262	0.921021	1.12473	0.969663	1.04001	0.992503	1.01881	0.909539	1.07287	0.899837	0.134179	0.979352	0.697976	0.918809	0.141473
F1RLJ4	Uncharacterized protein	SCAMP3	Secretory carrier-associated membrane protein 3 OS=Homo sapiens GN=SCAMP3 PE=1 SV=3	Secretory carrier-associated membrane protein 3 OS=Mus musculus GN=Scamp3 PE=1 SV=3	38.248	0.908084	1.1481	0.897844	0.907016	1.19507	0.933534	0.97226	1.00269	0.972279	1.19339	0.0749284	1.20037	0.0703642	0.994187	0.867091
F1RLL1	Uncharacterized protein	---	Rho guanine nucleotide exchange factor 7 OS=Homo sapiens GN=ARHGEF7 PE=1 SV=2	Rho guanine nucleotide exchange factor 7 OS=Mus musculus GN=Arhgef7 PE=1 SV=2	81.461	1.08055	0.803997	1.08119	1.11861	0.760216	1.1046	1.11446	0.845222	1.03962	0.747017	0.00122617	0.727131	0.00182825	1.02735	0.272959
F1RLL9	Uncharacterized protein	COL4A2	Collagen alpha-2(IV) chain OS=Homo sapiens GN=COL4A2 PE=1 SV=4	Collagen alpha-2(IV) chain OS=Mus musculus GN=Col4a2 PE=2 SV=4	161.21	0.684639	1.46739	0.860702	0.786657	1.38557	0.83589	0.851273	1.43919	0.75538	1.75048	0.000166192	1.84801	0.00136347	0.947225	0.504444
F1RLM1	Uncharacterized protein	COL4A1	Collagen alpha-1(IV) chain OS=Homo sapiens GN=COL4A1 PE=1 SV=3	Collagen alpha-1(IV) chain OS=Mus musculus GN=Col4a1 PE=2 SV=4	156.02	0.653463	1.6696	0.687405	0.66046	1.68354	0.734341	0.89689	1.41798	0.708784	2.2394	0.00823951	2.15808	0.00196121	1.03768	0.771375
F1RLM7	Uncharacterized protein	KIAA0907	UPF0469 protein KIAA0907 OS=Homo sapiens GN=KIAA0907 PE=1 SV=1	UPF0469 protein KIAA0907 OS=Mus musculus GN=Kiaa0907 PE=2 SV=1	65.123	1.10504	0.750621	1.13214				1.12271	0.80363	1.08349	0.701496	0.0119005	0.697677	0.0322731	1.00547	0.847046
F1RLP1	DNA ligase	LIG4			103.8	1.17826	0.578507	1.22267	1.30413	0.678951	1.00452	1.24426	0.608922	1.16639	0.549975	0.00728058	0.50082	0.000239526	1.09815	0.230834
F1RLP4	EFNB2	EFNB2			36.928
F1RLP5	Rho guanine nucleotide exchange factor 2	ARHGEF2			108.47	1.27127	0.615372	1.11327	1.11759	0.760064	1.08047	1.07009	0.871686	1.04186	0.694498	0.0389876	0.649655	0.0146902	1.06903	0.345984
F1RLP9	Uncharacterized protein	UBQLN4	Ubiquilin-4 OS=Homo sapiens GN=UBQLN4 PE=1 SV=2	Ubiquilin-4 OS=Mus musculus GN=Ubqln4 PE=1 SV=1	63.928	0.82153	1.11749	1.0005	0.913533	1.07553	1.02212	0.895706	1.18588	0.91015	1.15212	0.0342731	1.28438	0.00453976	0.897026	0.0884023
F1RLQ2	Prelamin-A/C	LMNA			74.232	0.731657	1.6795	0.623631	0.606254	1.82456	0.633556	0.620192	1.63918	0.710348	2.61405	0.000549608	2.62664	0.000205789	0.995205	0.95151
F1RLQ5	Uncharacterized protein	---	KDEL motif-containing protein 1 OS=Homo sapiens GN=KDELC1 PE=1 SV=1	KDEL motif-containing protein 1 OS=Mus musculus GN=Kdelc1 PE=1 SV=1	57.704	1.00337	1.08847	0.91322	0.939314	1.11921	0.960249	0.897561	1.09817	0.995754	1.15217	0.0162263	1.16393	0.0290087	0.989899	0.817094
F1RLQ6	Uncharacterized protein	---	Testis-expressed sequence 30 protein OS=Homo sapiens GN=TEX30 PE=2 SV=1	Testis-expressed sequence 30 protein OS=Mus musculus GN=Tex30 PE=2 SV=1	14.161				1.00225	1.08357	0.924242	1.02236	0.981617	0.997891	1.07442	0.383019	1.02004	0.759308	1.05332	0.38561
F1RLQ9	Uncharacterized protein	---	Tripeptidyl-peptidase 2 OS=Homo sapiens GN=TPP2 PE=1 SV=4	Tripeptidyl-peptidase 2 OS=Mus musculus GN=Tpp2 PE=2 SV=3	136.78	1.14046	0.868254	0.994029	1.08253	0.829015	1.07518	1.01662	1.07366	0.914787	0.928597	0.477613	0.855328	0.164308	1.08566	0.223414
F1RLR4	Uncharacterized protein	ERCC4	DNA repair endonuclease XPF OS=Homo sapiens GN=ERCC4 PE=1 SV=3	DNA repair endonuclease XPF OS=Mus musculus GN=Ercc4 PE=2 SV=3	104	1.14063	0.786401	1.06685	1.15242	0.763821	1.06865	1.11031	0.702811	1.19516	0.676453	0.00411148	0.662002	0.000913892	1.02183	0.631844
F1RLR6	Uncharacterized protein	---	Bifunctional apoptosis regulator OS=Homo sapiens GN=BFAR PE=1 SV=1	Bifunctional apoptosis regulator OS=Mus musculus GN=Bfar PE=1 SV=1	36.412
F1RLR7	Uncharacterized protein	---	Poly(A)-specific ribonuclease PARN OS=Homo sapiens GN=PARN PE=1 SV=1	Poly(A)-specific ribonuclease PARN OS=Mus musculus GN=Parn PE=1 SV=1	40.064	0.930141	1.00297	1.06116							0.945164		1.0783		0.876534
F1RLS1	Uncharacterized protein	SPECC1L	Cytospin-A OS=Homo sapiens GN=SPECC1L PE=1 SV=2	Cytospin-A OS=Mus musculus GN=Specc1l PE=1 SV=1	124.95	0.604101	1.68695	0.733444	0.545982	1.78685	0.722021				2.38673	0.0294532	3.02048	0.00637337	0.790183	0.109062
F1RLS2	Uncharacterized protein	BCR	Breakpoint cluster region protein OS=Homo sapiens GN=BCR PE=1 SV=2	Breakpoint cluster region protein OS=Mus musculus GN=Bcr PE=1 SV=3	90.362	0.748796	1.44517	0.822367				0.821477	1.26181	0.902304	1.56956	0.0787201	1.72389	0.0692794	0.910476	0.290243
F1RLV4	Phosphatidylserine decarboxylase proenzyme, mitochondrial	PISD			46.889				0.959503	1.12532	0.926583				1.21449		1.17282		1.03553
F1RLY9	Uncharacterized protein	DHX34	Probable ATP-dependent RNA helicase DHX34 OS=Homo sapiens GN=DHX34 PE=1 SV=2	Probable ATP-dependent RNA helicase DHX34 OS=Mus musculus GN=Dhx34 PE=4 SV=1	128.69	1.01764	0.945547	1.04263	1.09572	0.861926	0.992337	1.06881	0.896671	1.03615	0.880509	0.0183997	0.84978	0.00886613	1.03616	0.262258
F1RLZ0	Uncharacterized protein	C5AR2	C5a anaphylatoxin chemotactic receptor 2 OS=Homo sapiens GN=C5AR2 PE=1 SV=1	C5a anaphylatoxin chemotactic receptor 2 OS=Mus musculus GN=C5ar2 PE=1 SV=1	36.388
F1RM03	Uncharacterized protein	SAE1	SUMO-activating enzyme subunit 1 OS=Homo sapiens GN=SAE1 PE=1 SV=1	SUMO-activating enzyme subunit 1 OS=Mus musculus GN=Sae1 PE=2 SV=1	38.312	1.12536	0.888277	1.0007	1.15364	0.826142	1.00897	0.966702	1.11587	0.88396	0.978112	0.842362	0.872012	0.269664	1.12167	0.18143
F1RM07	Uncharacterized protein	ARHGAP35	Rho GTPase-activating protein 35 OS=Homo sapiens GN=ARHGAP35 PE=1 SV=3	Rho GTPase-activating protein 35 OS=Mus musculus GN=Arhgap35 PE=1 SV=3	170.55	1.15169	0.672831	1.16066	1.11021	0.784506	1.12465	1.16711	0.69588	1.14866	0.627034	0.0034832	0.627942	0.00168685	0.998553	0.938756
F1RM09	Uncharacterized protein	STRN4	Striatin-4 OS=Homo sapiens GN=STRN4 PE=1 SV=2	Striatin-4 OS=Mus musculus GN=Strn4 PE=1 SV=2	60.15	1.03688	0.912898	1.02018	1.08296	0.918125	0.996202	0.872083	1.08982	1.01879	0.962331	0.580409	0.976242	0.797746	0.98575	0.843309
F1RM10	Uncharacterized protein	TCERG1	Transcription elongation regulator 1 OS=Homo sapiens GN=TCERG1 PE=1 SV=2	Transcription elongation regulator 1 OS=Mus musculus GN=Tcerg1 PE=1 SV=2	120.68	1.10452	0.772118	1.08739	1.14839	0.764627	1.05013	1.10853	0.810156	1.05674	0.734724	0.000130604	0.698183	6.98911e-05	1.05234	0.0389233
F1RM12	Uncharacterized protein	LOC100511626	RNA-binding protein 27 OS=Homo sapiens GN=RBM27 PE=1 SV=2	RNA-binding protein 27 OS=Mus musculus GN=Rbm27 PE=2 SV=3	48.097	0.947609	0.909835	1.1304							0.804877		0.960138		0.838293
F1RM18	Uncharacterized protein	RBM27	RNA-binding protein 27 OS=Homo sapiens GN=RBM27 PE=1 SV=2	RNA-binding protein 27 OS=Mus musculus GN=Rbm27 PE=2 SV=3	70.572	0.811504	1.25658	0.937582	0.918052	1.23803	0.865162	0.911208	1.19987	0.882081	1.37606	0.000375357	1.39902	0.00316646	0.983589	0.740107
F1RM23	Uncharacterized protein	CCDC61	Coiled-coil domain-containing protein 61 OS=Homo sapiens GN=CCDC61 PE=1 SV=3	Coiled-coil domain-containing protein 61 OS=Mus musculus GN=Ccdc61 PE=2 SV=1	58.215	0.894825	1.10351	0.893636							1.23486		1.23322		1.00133
F1RM25	Serine/threonine-protein phosphatase	PPP5C			56.896	0.98835	0.965224	1.01059	0.968539	1.01031	1.01644	0.93553	1.12098	0.917518	1.05161	0.424812	1.07056	0.276519	0.982297	0.659861
F1RM28	Uncharacterized protein	NOVA2	RNA-binding protein Nova-2 OS=Homo sapiens GN=NOVA2 PE=1 SV=1	Protein Nova2 OS=Mus musculus GN=Nova2 PE=2 SV=1	55.316				1.12887	0.708042	1.13941	1.10433	0.749959	1.15368	0.635823	0.018292	0.652876	0.00909931	0.97388	0.199598
F1RM37	Uncharacterized protein	ARHGAP26	Rho GTPase-activating protein 26 OS=Homo sapiens GN=ARHGAP26 PE=1 SV=1	Rho GTPase-activating protein 26 OS=Mus musculus GN=Arhgap26 PE=1 SV=3	89.149
F1RM40	Uncharacterized protein	SYMPK	Symplekin OS=Homo sapiens GN=SYMPK PE=1 SV=2	Symplekin OS=Mus musculus GN=Sympk PE=1 SV=1	141.02	1.11903	0.811187	0.97726	1.11566	0.769223	1.05437	1.03136	0.882172	1.06119	0.796225	0.00866311	0.753995	0.0038179	1.05601	0.216248
F1RM42	Uncharacterized protein	IRF2BP1	Interferon regulatory factor 2-binding protein 1 OS=Homo sapiens GN=IRF2BP1 PE=1 SV=1	Interferon regulatory factor 2-binding protein 1 OS=Mus musculus GN=Irf2bp1 PE=1 SV=2	61.6	1.10351	0.816934	1.07005	1.13371	0.765933	1.08132	1.05945	0.882496	1.09654	0.759062	0.0129333	0.747835	0.00407606	1.01501	0.538032
F1RM44	Uncharacterized protein	TOMM40	Mitochondrial import receptor subunit TOM40 homolog OS=Homo sapiens GN=TOMM40 PE=1 SV=1	Mitochondrial import receptor subunit TOM40 homolog OS=Mus musculus GN=Tomm40 PE=1 SV=3	32.973	0.855568	1.20321	0.956646	0.921604	1.13251	0.969438	0.95836	1.03683	0.972732	1.16342	0.0804402	1.23287	0.0275855	0.943672	0.209569
F1RM45	Apolipoprotein E	APOE			36.664	1.29444	0.404849	1.2457	1.31149	0.480763	1.15405	1.40518	0.384874	1.18569	0.354347	4.34718e-05	0.316742	4.30385e-05	1.11872	0.0341262
F1RM46	Uncharacterized protein	APOC4	Apolipoprotein C-IV OS=Homo sapiens GN=APOC4 PE=1 SV=1	Apolipoprotein C-IV OS=Mus musculus GN=Apoc4 PE=2 SV=1	14.303	1.15872	0.827694	1.01253							0.817449		0.714318		1.14438
F1RM47	Uncharacterized protein	CLPTM1	Cleft lip and palate transmembrane protein 1 OS=Homo sapiens GN=CLPTM1 PE=1 SV=1	Cleft lip and palate transmembrane protein 1 homolog OS=Mus musculus GN=Clptm1 PE=2 SV=1	75.165	0.83159	1.2275	0.945824	0.832342	1.34438	0.84989	0.862123	1.15697	0.969568	1.34845	0.0114165	1.47616	0.015593	0.91349	0.153445
F1RM50	Uncharacterized protein	RNF14	E3 ubiquitin-protein ligase RNF14 OS=Homo sapiens GN=RNF14 PE=1 SV=1	E3 ubiquitin-protein ligase RNF14 OS=Mus musculus GN=Rnf14 PE=2 SV=2	53.793	1.09618	0.777432	1.1157							0.696809		0.709218		0.982503
F1RM55	Alpha-mannosidase	MAN2A1			131.41	1.07956	0.723223	1.19042	1.0856	0.736788	1.15544	1.10152	0.666462	1.23181	0.594374	9.68838e-05	0.650957	0.00160192	0.913078	0.0337787
F1RM56	Uncharacterized protein	RBM42	RNA-binding protein 42 OS=Homo sapiens GN=RBM42 PE=1 SV=1	RNA-binding protein 42 OS=Mus musculus GN=Rbm42 PE=2 SV=1	50.265	0.873645	1.11539	1.04189	1.06993	0.932984	0.999551	1.16489	0.801222	0.982717	0.942277	0.590643	0.91672	0.528395	1.02788	0.776516
F1RM57	Uncharacterized protein	HAUS5	HAUS augmin-like complex subunit 5 OS=Homo sapiens GN=HAUS5 PE=1 SV=2	HAUS augmin-like complex subunit 5 OS=Mus musculus GN=Haus5 PE=2 SV=1	71.166	0.892943	1.27348	0.847657	0.995763	1.05695	0.953663	1.08134	0.904588	1.02075	1.14633	0.332815	1.08922	0.515796	1.05244	0.54275
F1RM63	Uncharacterized protein	LIN37	Protein lin-37 homolog OS=Homo sapiens GN=LIN37 PE=1 SV=1	Protein lin-37 homolog OS=Mus musculus GN=Lin37 PE=2 SV=1	28.419	0.933379	1.16372	0.911115							1.27725		1.24678		1.02444
F1RM65	Uncharacterized protein	U2AF1L4	Splicing factor U2AF 26 kDa subunit OS=Homo sapiens GN=U2AF1L4 PE=1 SV=2	Splicing factor U2AF 26 kDa subunit OS=Mus musculus GN=U2af1l4 PE=1 SV=1	27.186	0.93959	0.981021	1.0094	1.05328	0.952873	0.991815	0.999936	0.94954	1.04729	0.945853	0.0570325	0.963455	0.384397	0.98173	0.648413
F1RM66	Uncharacterized protein	KMT2B	Histone-lysine N-methyltransferase 2B OS=Homo sapiens GN=KMT2B PE=1 SV=1	Histone-lysine N-methyltransferase 2B OS=Mus musculus GN=Kmt2b PE=2 SV=1	294.78	1.12832	0.856294	1.01416	1.21204	0.800967	0.981282	1.05667	0.595858	1.35055	0.673378	0.071197	0.663263	0.0223369	1.01525	0.90268
F1RM73	Uncharacterized protein	---	Suprabasin OS=Homo sapiens GN=SBSN PE=2 SV=2	Suprabasin OS=Mus musculus GN=Sbsn PE=4 SV=1	20.902
F1RM74	Glyceraldehyde-3-phosphate dehydrogenase	GAPDHS			39.359	1.20457	0.682825	1.10316	1.18213	0.678487	1.11669	1.09264	0.867213	1.04764	0.68203	0.0216171	0.640502	0.0089118	1.06484	0.167916
F1RM77	Uncharacterized protein	USF2	Upstream stimulatory factor 2 OS=Homo sapiens GN=USF2 PE=2 SV=1	Upstream stimulatory factor 2 OS=Mus musculus GN=Usf2 PE=1 SV=1	36.967	0.883523	1.34531	0.808208	0.78481	1.49765	0.758274	0.730013	1.45461	0.793857	1.82074	0.00242206	1.79189	0.000580138	1.0161	0.809894
F1RM83	Uncharacterized protein	GRAMD1A	GRAM domain-containing protein 1A OS=Homo sapiens GN=GRAMD1A PE=1 SV=2	GRAM domain-containing protein 1A OS=Mus musculus GN=Gramd1a PE=2 SV=2	80.598	0.882415	1.08091	1.03348							1.04589		1.22494		0.853825
F1RM86	Uncharacterized protein	ADAMDEC1	ADAM DEC1 OS=Homo sapiens GN=ADAMDEC1 PE=1 SV=2	ADAM DEC1 OS=Mus musculus GN=Adamdec1 PE=2 SV=1	51.441	1.67365	0.329755	0.997306	1.67528	0.0840234	1.18917				0.189244	0.033593	0.123555	0.0531645	1.53166	0.104115
F1RM98	Uncharacterized protein	LOC100624226	Tumor necrosis factor receptor superfamily member 10B OS=Homo sapiens GN=TNFRSF10B PE=1 SV=2	Tumor necrosis factor receptor superfamily member 10B OS=Mus musculus GN=Tnfrsf10b PE=2 SV=3	49.127	1.01918	0.929054	1.04738							0.887028		0.911571		0.973075
F1RMA3	Uncharacterized protein	CCAR2	Cell cycle and apoptosis regulator protein 2 OS=Homo sapiens GN=CCAR2 PE=1 SV=2	Cell cycle and apoptosis regulator protein 2 OS=Mus musculus GN=Ccar2 PE=1 SV=2	102.01	1.16186	0.694609	1.13492	1.19675	0.651388	1.14033	1.15405	0.701558	1.14722	0.598266	0.000712115	0.582906	2.35737e-05	1.02635	0.141273
F1RMA6	Uncharacterized protein	SORBS3	Vinexin OS=Homo sapiens GN=SORBS3 PE=1 SV=2	Vinexin OS=Mus musculus GN=Sorbs3 PE=1 SV=1	82.014	1.07367	0.888364	1.05985	1.13223	0.688701	1.15339	1.10667	0.744865	1.15662	0.689029	0.0133339	0.700945	0.0238598	0.983	0.631697
F1RMB1	Uncharacterized protein	PHYHIP	Phytanoyl-CoA hydroxylase-interacting protein OS=Homo sapiens GN=PHYHIP PE=1 SV=1	Phytanoyl-CoA hydroxylase-interacting protein OS=Mus musculus GN=Phyhip PE=1 SV=1	38.538
F1RMB2	Metalloendopeptidase	BMP1			114.1	0.931255	1.00636	1.06535	0.952294	0.917864	1.04961	0.970721	0.970248	1.05168	0.914054	0.0668427	1.01409	0.668698	0.901357	0.00506802
F1RMD0	Uncharacterized protein	NEK3	Serine/threonine-protein kinase Nek3 OS=Homo sapiens GN=NEK3 PE=1 SV=2	Serine/threonine-protein kinase Nek3 OS=Mus musculus GN=Nek3 PE=2 SV=1	56.865	1.0863	0.801938	1.10231	1.11287	0.793606	1.07861	1.10681	0.818245	1.08345	0.739434	1.00771e-05	0.730127	1.14689e-05	1.01275	0.269546
F1RMD2	Uncharacterized protein	CKAP2	Cytoskeleton-associated protein 2 OS=Homo sapiens GN=CKAP2 PE=1 SV=1	Cytoskeleton-associated protein 2 OS=Mus musculus GN=Ckap2 PE=2 SV=1	78.405				0.565414	1.90662	0.598603	0.849978	1.52737	0.611973	2.83666	0.107194	2.42618	0.0580916	1.16919	0.602742
F1RMD6	Uncharacterized protein	VPS36	Vacuolar protein-sorting-associated protein 36 OS=Homo sapiens GN=VPS36 PE=1 SV=1	Vacuolar protein-sorting-associated protein 36 OS=Mus musculus GN=Vps36 PE=1 SV=1	43.734	1.14669	0.706279	1.11021	1.17643	0.678468	1.09874	1.15549	0.77145	1.08561	0.654473	0.00336645	0.619845	0.00188896	1.05587	0.0063838
F1RMD8	Uncharacterized protein	LOC100625564	Phosphatidylinositol 3,4,5-trisphosphate 3-phosphatase TPTE2 OS=Homo sapiens GN=TPTE2 PE=1 SV=2	MCG118205, isoform CRA_c OS=Mus musculus GN=Tpte PE=4 SV=1	55.043	1.10957	1.0499	0.854159	1.26552	1.26426	0.523749	1.25637	1.22501	0.542118	1.8433	0.0189055	0.974589	0.731033	1.89136	0.0192391
F1RME2	Uncharacterized protein	MRPS31	28S ribosomal protein S31, mitochondrial OS=Homo sapiens GN=MRPS31 PE=1 SV=3	28S ribosomal protein S31, mitochondrial OS=Mus musculus GN=Mrps31 PE=2 SV=1	43.954	0.814661	1.45493	0.766096	0.775538	1.41626	0.85029	0.921157	1.12826	0.944278	1.56188	0.026231	1.59255	0.0266701	0.980744	0.819627
F1RME6	Forkhead box protein O1	FOXO1			69.818	0.902838	0.990472	1.03971	0.975231	1.05036	0.933733	0.990061	0.920681	1.0239	0.988044	0.822874	1.03256	0.540509	0.956889	0.371387
F1RMF1	Uncharacterized protein	ZFP91	E3 ubiquitin-protein ligase ZFP91 OS=Homo sapiens GN=ZFP91 PE=1 SV=1	E3 ubiquitin-protein ligase ZFP91 OS=Mus musculus GN=Zfp91 PE=1 SV=3	50.413	0.985342	1.03268	0.983502	0.959455	1.14073	0.913044				1.14598	0.185279	1.11755	0.267401	1.02544	0.617001
F1RMF9	Uncharacterized protein	FAM111B	Protein FAM111B OS=Homo sapiens GN=FAM111B PE=1 SV=1	Protein FAM111A OS=Mus musculus GN=Fam111a PE=2 SV=1	84.148	1.11443	1.0168	0.879998	1.00834	1.07314	0.927866	0.977308	1.02203	0.998775	1.10879	0.0789666	1.00383	0.936248	1.10455	0.146601
F1RMH4	Uncharacterized protein	ZXDC	Zinc finger protein ZXDC OS=Homo sapiens GN=ZXDC PE=1 SV=2	Zinc finger protein ZXDC OS=Mus musculus GN=Zxdc PE=2 SV=1	87.624				1.0579	0.959734	0.982468				0.976861		0.907205		1.07678
F1RMH7	Uncharacterized protein	UNC45A	Protein unc-45 homolog A OS=Homo sapiens GN=UNC45A PE=1 SV=1	Protein unc-45 homolog A OS=Mus musculus GN=Unc45a PE=1 SV=2	103.14	1.17078	0.641253	1.14288	1.15106	0.65445	1.16727	1.13496	0.732595	1.11358	0.592423	0.00062841	0.586757	0.00140436	1.00966	0.590875
F1RMI9	Alpha-mannosidase	MAN2A2			130.62				0.824689	1.13502	1.04152				1.08978		1.3763		0.791814
F1RMJ0	Tyrosine-protein kinase	FES			93.385	1.15588	0.844383	1.00084	1.14437	0.797144	1.04664	1.15145	0.798603	1.09715	0.775969	0.00443474	0.706934	0.00141688	1.09765	0.0645535
F1RMJ3	Uncharacterized protein	---	Bloom syndrome protein OS=Homo sapiens GN=BLM PE=1 SV=1	Bloom syndrome protein homolog OS=Mus musculus GN=Blm PE=1 SV=1	60.38	1.08651	0.831106	1.07544	1.16943	0.694861	1.11388				0.697006	0.108359	0.676423	0.0630213	1.03043	0.567764
F1RMJ4	Uncharacterized protein	---	Ras GTPase-activating-like protein IQGAP1 OS=Homo sapiens GN=IQGAP1 PE=1 SV=1	Ras GTPase-activating-like protein IQGAP1 OS=Mus musculus GN=Iqgap1 PE=1 SV=2	96.838	1.17607	0.640665	1.15229	1.1851	0.697457	1.10165	1.1764	0.75343	1.07528	0.62824	0.000855865	0.591241	0.00426976	1.06258	0.0891379
F1RMJ5	Phosphodiesterase	PDE8A			74.731	0.933953	1.02838	1.03442	1.03038	0.998977	0.973074				1.00989	0.806939	1.03208	0.630603	0.978497	0.747595
F1RMJ9	Oxysterol-binding protein	OSBP			89.612	1.10838	0.857796	1.05199	1.05909	0.831304	1.09215	1.05914	0.876106	1.08131	0.795305	0.00024941	0.795015	0.000599513	1.00037	0.985591
F1RMK7	Uncharacterized protein	ZNF787	Zinc finger protein 787 OS=Homo sapiens GN=ZNF787 PE=1 SV=3	Zinc finger protein 787 OS=Mus musculus GN=Znf787 PE=2 SV=3	40.604	0.809868	1.38097	0.825263	0.470807	2.00032	0.602643	0.649789	1.67428	0.648403	2.43488	0.020262	2.61884	0.0133896	0.929757	0.706588
F1RMN3	Uncharacterized protein	PPP6R1	Serine/threonine-protein phosphatase 6 regulatory subunit 1 OS=Homo sapiens GN=PPP6R1 PE=1 SV=5	Serine/threonine-protein phosphatase 6 regulatory subunit 1 OS=Mus musculus GN=Ppp6r1 PE=1 SV=1	96.452	1.15818	0.738189	1.09492				1.22268	0.655309	1.13991	0.623536	0.0260523	0.585293	0.013382	1.06534	0.219329
F1RMN5	Uncharacterized protein	APBB1	Amyloid beta A4 precursor protein-binding family B member 1 OS=Homo sapiens GN=APBB1 PE=1 SV=2	Amyloid beta A4 precursor protein-binding family B member 1 OS=Mus musculus GN=Apbb1 PE=1 SV=3	76.952
F1RMN7	Hemopexin	HPX			51.291	0.908974	1.0365	1.04588							0.99103		1.1403		0.869098
F1RMN8	Uncharacterized protein	TRIM3	Tripartite motif-containing protein 3 OS=Homo sapiens GN=TRIM3 PE=1 SV=2	Tripartite motif-containing protein 3 OS=Mus musculus GN=Trim3 PE=1 SV=1	79.659	1.00233	0.91612	1.07461	1.03053	0.94755	1.01828	1.04861	0.843518	1.1114	0.844861	0.0161181	0.878536	0.0396812	0.961669	0.270678
F1RMN9	Uncharacterized protein	ARFIP2	Arfaptin-2 OS=Homo sapiens GN=ARFIP2 PE=1 SV=1	Arfaptin-2 OS=Mus musculus GN=Arfip2 PE=2 SV=2	37.692				1.0775	0.803161	1.10259				0.728434		0.745392		0.97725
F1RMP0	Uncharacterized protein	TIMM10B	Mitochondrial import inner membrane translocase subunit Tim10 B OS=Homo sapiens GN=TIMM10B PE=1 SV=1	Mitochondrial import inner membrane translocase subunit Tim10 B OS=Mus musculus GN=Timm10b PE=2 SV=1	11.602				0.917787	1.10684	0.981094	0.907709	1.06882	1.01571	1.08957	0.0745737	1.19182	0.0541668	0.914208	0.105306
F1RMQ4	Uncharacterized protein	MRPL17	39S ribosomal protein L17, mitochondrial OS=Homo sapiens GN=MRPL17 PE=1 SV=1	39S ribosomal protein L17, mitochondrial OS=Mus musculus GN=Mrpl17 PE=1 SV=1	19.24	0.71046	1.572	0.741374				0.811481	1.30882	0.86463	1.79378	0.0861402	1.89286	0.0888401	0.947657	0.652307
F1RMR5	Uncharacterized protein	ISOC2	Isochorismatase domain-containing protein 2, mitochondrial OS=Homo sapiens GN=ISOC2 PE=1 SV=1	Isochorismatase domain-containing protein 2A, mitochondrial OS=Mus musculus GN=Isoc2a PE=1 SV=1	13.145	0.993254	1.12819	0.888876	0.951449	1.16763	0.896656	0.936555	1.15035	0.908238	1.27931	0.000338846	1.19606	0.00141496	1.0696	0.0546501
F1RMR6	Uncharacterized protein	HSPBP1	Hsp70-binding protein 1 OS=Homo sapiens GN=HSPBP1 PE=1 SV=1	Hsp70-binding protein 1 OS=Mus musculus GN=Hspbp1 PE=2 SV=1	39.112	1.07661	0.92524	0.992763	0.794036	1.40959	0.827477	0.925855	1.1807	0.887792	1.29819	0.1859	1.25712	0.229448	1.03267	0.774772
F1RMT5	Uncharacterized protein	DIAPH1	Protein diaphanous homolog 1 OS=Homo sapiens GN=DIAPH1 PE=1 SV=2	Protein diaphanous homolog 1 OS=Mus musculus GN=Diap1 PE=2 SV=1	139.02	1.24619	0.63638	1.09628	1.22154	0.623014	1.09058	1.16012	0.779707	1.04288	0.631349	0.00954137	0.562068	0.00263299	1.12326	0.0168491
F1RMU2	Uncharacterized protein	TAF7	Transcription initiation factor TFIID subunit 7 OS=Homo sapiens GN=TAF7 PE=1 SV=1	Transcription initiation factor TFIID subunit 7 OS=Mus musculus GN=Taf7 PE=1 SV=1	40.245	0.753708	1.47114	0.794116	0.867866	1.40916	0.760226	0.815448	1.43311	0.737296	1.88224	1.10601e-05	1.76995	0.000392462	1.06344	0.281994
F1RMV5	Uncharacterized protein	---	Persulfide dioxygenase ETHE1, mitochondrial OS=Homo sapiens GN=ETHE1 PE=1 SV=2	Persulfide dioxygenase ETHE1, mitochondrial OS=Mus musculus GN=Ethe1 PE=1 SV=2	14.211	0.935525	1.06745	0.989021	0.978993	0.945997	1.05057	1.01359	0.934244	1.05305	0.953131	0.385512	1.00669	0.900751	0.9468	0.149985
F1RMV8	Uncharacterized protein	CADM4	Cell adhesion molecule 4 OS=Homo sapiens GN=CADM4 PE=1 SV=1	Cell adhesion molecule 4 OS=Mus musculus GN=Cadm4 PE=1 SV=1	43.26	0.574064	1.68718	0.760702	0.765373	1.40302	0.859525	0.888862	1.21238	0.888748	1.71488	0.0409046	1.93088	0.0186445	0.888131	0.423232
F1RMW4	Uncharacterized protein	XRCC1	DNA repair protein XRCC1 OS=Homo sapiens GN=XRCC1 PE=1 SV=2	DNA repair protein XRCC1 OS=Mus musculus GN=Xrcc1 PE=1 SV=2	70.83	1.08555	0.87575	1.05031	1.12905	0.851689	0.983177	1.09697	0.838998	0.990116	0.848801	0.00811716	0.774991	0.000155488	1.09524	0.026066
F1RMW5	Uncharacterized protein	ZNF575	Zinc finger protein 575 OS=Homo sapiens GN=ZNF575 PE=2 SV=1	Zinc finger protein 575 OS=Mus musculus GN=Znf575 PE=2 SV=1	37.48	0.949912	1.07543	0.97678							1.101		1.13214		0.972493
F1RMX5	Uncharacterized protein	EPHB4	Ephrin type-B receptor 4 OS=Homo sapiens GN=EPHB4 PE=1 SV=2	Ephrin type-B receptor 4 OS=Mus musculus GN=Ephb4 PE=1 SV=2	108.41	0.71386	1.37584	0.93241	0.885601	1.21872	0.911915	0.887707	1.1566	0.964583	1.33545	0.0347331	1.50821	0.00871927	0.885457	0.197956
F1RMX8	Uncharacterized protein	POP7	Ribonuclease P protein subunit p20 OS=Homo sapiens GN=POP7 PE=1 SV=2	Ribonuclease P protein subunit p20 OS=Mus musculus GN=Pop7 PE=2 SV=1	15.743	0.95715	1.06831	0.976679				0.889362	1.15572	0.945957	1.15676	0.149463	1.20445	0.0827979	0.960407	0.451251
F1RMY0	Uncharacterized protein	---	PERQ amino acid-rich with GYF domain-containing protein 1 OS=Homo sapiens GN=GIGYF1 PE=1 SV=2	PERQ amino acid-rich with GYF domain-containing protein 1 OS=Mus musculus GN=Gigyf1 PE=1 SV=2	110.49
F1RMY4	Uncharacterized protein	AGFG2	Arf-GAP domain and FG repeat-containing protein 2 OS=Homo sapiens GN=AGFG2 PE=1 SV=2	Arf-GAP domain and FG repeat-containing protein 2 OS=Mus musculus GN=Agfg2 PE=2 SV=1	49.938				1.12292	0.887002	0.987044	1.22958	0.698203	1.09091	0.762867	0.184668	0.673836	0.0994952	1.13213	0.20656
F1RMY9	Uncharacterized protein	MEPCE	7SK snRNA methylphosphate capping enzyme OS=Homo sapiens GN=MEPCE PE=1 SV=1	7SK snRNA methylphosphate capping enzyme OS=Mus musculus GN=Mepce PE=1 SV=2	74.37	0.97804	1.01954	0.956514	1.15226	0.790493	0.931477	0.888376	1.04304	0.996253	0.989189	0.910497	0.945138	0.647268	1.04661	0.625366
F1RMZ0	Uncharacterized protein	ATXN2	Ataxin-2 OS=Homo sapiens GN=ATXN2 PE=1 SV=2	Ataxin-2 OS=Mus musculus GN=Atxn2 PE=2 SV=1	138.31	0.521847	1.77115	0.731615	0.882258	1.32101	0.824781	0.975169	1.0621	0.924354	1.67459	0.106044	1.74602	0.0858959	0.959095	0.836912
F1RMZ3	Uncharacterized protein	FAM109A	Sesquipedalian-1 OS=Homo sapiens GN=FAM109A PE=1 SV=1	Sesquipedalian-1 OS=Mus musculus GN=Fam109a PE=2 SV=1	24.187				1.139	0.8421	1.01191				0.832186		0.739331		1.12559
F1RMZ8	Uncharacterized protein	LOC106504095	V-type proton ATPase subunit B, brain isoform OS=Homo sapiens GN=ATP6V1B2 PE=1 SV=3	V-type proton ATPase subunit B, brain isoform OS=Mus musculus GN=Atp6v1b2 PE=1 SV=1	56.612	1.03669	0.959045	1.01585	0.977391	0.870846	1.08538	1.03383	0.980067	0.980257	0.911885	0.118152	0.92193	0.12666	0.989104	0.776647
F1RN05	Uncharacterized protein	SPTLC1	Serine palmitoyltransferase 1 OS=Homo sapiens GN=SPTLC1 PE=1 SV=1	Serine palmitoyltransferase 1 OS=Mus musculus GN=Sptlc1 PE=2 SV=2	51.315	0.853841	1.24556	0.896618	0.88099	1.21237	0.93319	0.949011	1.00294	1.04359	1.20445	0.106173	1.28952	0.0620677	0.93403	0.305449
F1RN10	Uncharacterized protein	AUH	Methylglutaconyl-CoA hydratase, mitochondrial OS=Homo sapiens GN=AUH PE=1 SV=1	Methylglutaconyl-CoA hydratase, mitochondrial OS=Mus musculus GN=Auh PE=1 SV=1	22.623	0.976682	0.950415	1.06669	1.00541	1.00507	0.990571	1.04365	0.931637	1.02822	0.935714	0.100763	0.954187	0.191653	0.980639	0.53473
F1RN27	Uncharacterized protein	MPHOSPH8	M-phase phosphoprotein 8 OS=Homo sapiens GN=MPHOSPH8 PE=1 SV=2	M-phase phosphoprotein 8 OS=Mus musculus GN=Mphosph8 PE=1 SV=1	95.212	1.01919	1.01472	0.968982	1.01165	1.07299	0.963742	0.663842	1.62473	0.684898	1.41825	0.193067	1.3777	0.224148	1.02944	0.87285
F1RN28	Uncharacterized protein	PSPC1	Paraspeckle component 1 OS=Homo sapiens GN=PSPC1 PE=1 SV=1	Paraspeckle component 1 OS=Mus musculus GN=Pspc1 PE=1 SV=1	52.176	1.03108	0.962469	0.951692	0.98895	1.0795	0.972211	0.999436	1.06203	0.940615	1.0836	0.153108	1.028	0.528125	1.05409	0.0343233
F1RN34	Uncharacterized protein	TMCO3	Transmembrane and coiled-coil domain-containing protein 3 OS=Homo sapiens GN=TMCO3 PE=2 SV=1	Transmembrane and coiled-coil domain-containing protein 3 OS=Mus musculus GN=Tmco3 PE=2 SV=1	75.032	0.966163	0.912606	1.1109							0.821499		0.944567		0.869709
F1RN38	Uncharacterized protein	TFDP1	Transcription factor Dp-1 OS=Homo sapiens GN=TFDP1 PE=1 SV=1	Transcription factor Dp-1 OS=Mus musculus GN=Tfdp1 PE=1 SV=1	48.873
F1RN41	Uncharacterized protein	F10	Coagulation factor X OS=Homo sapiens GN=F10 PE=1 SV=2	Coagulation factor X OS=Mus musculus GN=F10 PE=2 SV=1	53.186	1.24265	0.525446	1.19231	1.18849	0.507717	1.24919	1.27657	0.531705	1.18903	0.43103	0.000209386	0.422058	0.000618536	1.02126	0.472465
F1RN42	Uncharacterized protein	PCID2	PCI domain-containing protein 2 OS=Homo sapiens GN=PCID2 PE=1 SV=2	PCI domain-containing protein 2 OS=Mus musculus GN=Pcid2 PE=2 SV=1	46.518	1.10254	0.80452	1.07164	1.11785	0.820183	1.0645	1.05728	0.827363	1.06986	0.764836	0.000251831	0.748114	0.00173999	1.02235	0.318978
F1RN44	Uncharacterized protein	LAMP1	Lysosome-associated membrane glycoprotein 1 OS=Homo sapiens GN=LAMP1 PE=1 SV=3	Lysosome-associated membrane glycoprotein 1 OS=Mus musculus GN=Lamp1 PE=1 SV=2	44.014	0.997069	0.972166	0.972596	1.01369	0.830362	1.1344	1.17936	0.864312	0.971402	0.866309	0.121396	0.835968	0.0788291	1.03629	0.663885
F1RN46	Gamma-tubulin complex component	TUBGCP3			103.03	1.06876	0.877941	1.06265	1.02892	0.98138	0.965985	1.02515	0.929836	1.04928	0.906184	0.0862304	0.893152	0.047112	1.01459	0.68543
F1RN47	Uncharacterized protein	LOC100514095	E3 ubiquitin-protein ligase Praja-2 OS=Homo sapiens GN=PJA2 PE=1 SV=4	E3 ubiquitin-protein ligase Praja-2 OS=Mus musculus GN=Pja2 PE=1 SV=2	47.91
F1RN52	Uncharacterized protein	---	F-box/LRR-repeat protein 17 OS=Homo sapiens GN=FBXL17 PE=2 SV=3	F-box/LRR-repeat protein 17 OS=Mus musculus GN=Fbxl17 PE=2 SV=3	53.56	1.41574	0.294967	1.26496	1.3043	0.420154	1.23258	1.21366	0.493572	1.30912	0.317521	0.00170802	0.307266	0.000383647	1.03338	0.554105
F1RN59	Uncharacterized protein	PAM	Peptidyl-glycine alpha-amidating monooxygenase OS=Homo sapiens GN=PAM PE=1 SV=2	Peptidyl-glycine alpha-amidating monooxygenase OS=Mus musculus GN=Pam PE=1 SV=2	109.59	1.10593	0.641608	1.23106	1.04101	0.66715	1.25595	1.07869	0.753648	1.1734	0.563434	0.000377633	0.63938	0.00178274	0.88122	0.0108654
F1RN66	Uncharacterized protein	CHD1	Chromodomain-helicase-DNA-binding protein 1 OS=Homo sapiens GN=CHD1 PE=1 SV=2	Chromodomain-helicase-DNA-binding protein 1 OS=Mus musculus GN=Chd1 PE=1 SV=3	207.11	0.982109	1.01982	1.01265	1.00771	1.08936	0.892136	0.958964	1.14528	0.892839	1.16329	0.0484881	1.10367	0.0922012	1.05403	0.33629
F1RN68	Uncharacterized protein	CPD	Carboxypeptidase D OS=Homo sapiens GN=CPD PE=1 SV=2	Carboxypeptidase D OS=Mus musculus GN=Cpd PE=1 SV=2	152.11	0.94899	1.11815	0.928036	0.89402	1.09343	0.964715	0.949948	1.02881	0.962655	1.13483	0.0257	1.1602	0.0131285	0.97813	0.405764
F1RN70	Transporter	SLC6A4			70.159	0.983524	0.790641	1.20662	0.95198	0.981009	1.06073	1.09371	0.739098	1.17418	0.729543	0.031421	0.828844	0.129209	0.880193	0.089761
F1RN71	Uncharacterized protein	---	Bleomycin hydrolase OS=Homo sapiens GN=BLMH PE=1 SV=1	Bleomycin hydrolase OS=Mus musculus GN=Blmh PE=2 SV=1	21.93	0.639263	1.66942	0.717331							2.32727		2.61148		0.89117
F1RN72	Uncharacterized protein	NSRP1	Nuclear speckle splicing regulatory protein 1 OS=Homo sapiens GN=NSRP1 PE=1 SV=1	Nuclear speckle splicing regulatory protein 1 OS=Mus musculus GN=Nsrp1 PE=1 SV=1	65.988	0.683649	1.62055	0.72146	0.548428	1.94374	0.581429	0.442484	2.0006	0.51276	3.06496	0.00255763	3.32319	0.00182466	0.922293	0.639936
F1RN84	Uncharacterized protein	TAOK1	Serine/threonine-protein kinase TAO1 OS=Homo sapiens GN=TAOK1 PE=1 SV=1	Serine/threonine-protein kinase TAO1 OS=Mus musculus GN=Taok1 PE=1 SV=1	99.541	0.905459	1.07313	0.998162	0.886789	1.17703	0.892496	1.00458	0.964195	1.02708	1.10166	0.261146	1.14928	0.139448	0.958563	0.503764
F1RN87	Uncharacterized protein	---	ARF GTPase-activating protein GIT1 OS=Homo sapiens GN=GIT1 PE=1 SV=2	ARF GTPase-activating protein GIT1 OS=Mus musculus GN=Git1 PE=1 SV=1	83.462	1.27512	0.786419	0.943867	1.06138	0.76811	1.12284	1.03181	0.837186	1.08285	0.75938	0.0305943	0.710062	0.0432353	1.06946	0.485244
F1RN89	Uncharacterized protein	NUFIP2	Nuclear fragile X mental retardation-interacting protein 2 OS=Homo sapiens GN=NUFIP2 PE=1 SV=1	Nuclear fragile X mental retardation-interacting protein 2 OS=Mus musculus GN=Nufip2 PE=1 SV=1	76.103	0.566805	1.95216	0.538703	0.615421	1.83061	0.642111	0.725078	1.5359	0.719529	2.7988	0.00508759	2.78858	0.00588613	1.00366	0.975252
F1RN91	Uncharacterized protein	---	Unconventional myosin-XVIIIa OS=Homo sapiens GN=MYO18A PE=1 SV=3	Unconventional myosin-XVIIIa OS=Mus musculus GN=Myo18a PE=2 SV=1	109.4	1.10384	1.07808	1.00522	0.98145	1.10295	0.926207	1.00427	1.11748	0.900515	1.16475	0.0273655	1.06763	0.198189	1.09097	0.15697
F1RNA4	Uncharacterized protein	PHF12	PHD finger protein 12 OS=Homo sapiens GN=PHF12 PE=1 SV=2	PHD finger protein 12 OS=Mus musculus GN=Phf12 PE=1 SV=1	109.56	1.05844	0.894969	1.04267							0.858343		0.845558		1.01512
F1RNA5	Uncharacterized protein	---	Dehydrogenase/reductase SDR family member 13 OS=Homo sapiens GN=DHRS13 PE=2 SV=1	Dehydrogenase/reductase SDR family member 13 (Fragment) OS=Mus musculus GN=Dhrs13 PE=2 SV=1	8.6732	0.845626	1.33757	0.832281	0.894515	1.2235	0.899534				1.47884	0.0399789	1.47176	0.0539344	1.00481	0.930123
F1RNA6	Uncharacterized protein	FLOT2	Flotillin-2 OS=Homo sapiens GN=FLOT2 PE=1 SV=2	Flotillin-2 OS=Mus musculus GN=Flot2 PE=1 SV=2	45.382	1.03339	0.959451	1.01121	1.00263	0.889664	1.04773	1.06607	0.880154	1.09996	0.863994	0.0162917	0.879814	0.0189694	0.982019	0.584656
F1RNA9	Uncharacterized protein	FAM222B	Protein FAM222B OS=Homo sapiens GN=FAM222B PE=2 SV=1	Protein FAM222B OS=Mus musculus GN=Fam222b PE=2 SV=2	57.423
F1RNB0	Uncharacterized protein	SUPT6H	Transcription elongation factor SPT6 OS=Homo sapiens GN=SUPT6H PE=1 SV=2	Transcription elongation factor SPT6 OS=Mus musculus GN=Supt6h PE=1 SV=2	199.01	1.15024	0.768737	1.09748	1.15428	0.737727	1.10507	1.11949	0.80883	1.0811	0.705098	0.00179355	0.676193	0.000494352	1.04275	0.0301565
F1RNB1	Uncharacterized protein	SDF2	Stromal cell-derived factor 2 OS=Homo sapiens GN=SDF2 PE=1 SV=2	Stromal cell-derived factor 2 OS=Mus musculus GN=Sdf2 PE=2 SV=1	23.178	0.754335	1.38811	0.887112	0.82013	1.2574	0.937784	1.02812	0.976297	0.997936	1.28304	0.152464	1.39162	0.0907002	0.921977	0.476339
F1RNC7	Uncharacterized protein	KIAA0100	UPF0378 protein KIAA0100 OS=Homo sapiens GN=KIAA0100 PE=1 SV=3	UPF0378 protein KIAA0100 OS=Mus musculus GN=Kiaa0100 PE=2 SV=1	252.98
F1RND9	Uncharacterized protein	---	Gamma-interferon-inducible protein 16 OS=Homo sapiens GN=IFI16 PE=1 SV=3	Interferon-activable protein 204 OS=Mus musculus GN=Ifi204 PE=4 SV=1	87.174	1.42295	0.408098	1.12781	1.24897	0.614328	1.14121	1.29987	0.55059	1.21037	0.452095	0.00374046	0.396047	0.000639926	1.14152	0.0671787
F1RNG9	tRNA-splicing endonuclease subunit Sen34	TSEN34			33.839	1.14545	0.675521	1.1639	1.16718	0.755219	1.06271				0.642564	0.0286361	0.618663	0.0433613	1.03863	0.548864
F1RNH0	Uncharacterized protein	MBOAT7	Lysophospholipid acyltransferase 7 OS=Homo sapiens GN=MBOAT7 PE=1 SV=2	Lysophospholipid acyltransferase 7 OS=Mus musculus GN=Mboat7 PE=2 SV=1	52.752	0.911447	1.18825	0.902249	0.926539	1.16225	0.908749	0.930193	1.08333	0.975339	1.23238	0.00674603	1.24046	0.0170662	0.993483	0.822522
F1RNH3	Uncharacterized protein	CNOT3	CCR4-NOT transcription complex subunit 3 OS=Homo sapiens GN=CNOT3 PE=1 SV=1	CCR4-NOT transcription complex subunit 3 OS=Mus musculus GN=Cnot3 PE=1 SV=1	76.69				0.693457	1.6139	0.739444	0.654692	1.66778	0.650405	2.36118	0.0068352	2.43421	0.00194834	0.969997	0.72556
F1RNI3	Uncharacterized protein	PRPF31	U4/U6 small nuclear ribonucleoprotein Prp31 OS=Homo sapiens GN=PRPF31 PE=1 SV=2	U4/U6 small nuclear ribonucleoprotein Prp31 OS=Mus musculus GN=Prpf31 PE=2 SV=3	55.321	1.09244	0.867299	1.02733	1.14679	0.801909	1.04377	1.06197	0.847095	1.07236	0.80049	0.00151829	0.76224	0.00146151	1.05018	0.156562
F1RNM5	Uncharacterized protein	TCTN1	Tectonic-1 OS=Homo sapiens GN=TCTN1 PE=2 SV=2	Tectonic-1 OS=Mus musculus GN=Tctn1 PE=1 SV=1	63.841	0.753679	1.39587	0.863007				0.882085	1.16558	0.942785	1.41846	0.158873	1.5659	0.101703	0.905843	0.396444
F1RNN0	Vacuolar protein sorting-associated protein 29	VPS29			20.917	1.22811	0.639744	1.12105	1.14601	0.696879	1.169	1.14809	0.740162	1.09208	0.614045	0.000411036	0.589625	0.000272693	1.04142	0.256679
F1RNN7	Uncharacterized protein	C7orf43		Protein BC037034 OS=Mus musculus GN=BC037034 PE=4 SV=1	62.464							0.978441	0.866269	1.15278	0.751463		0.885357		0.848769
F1RNP1	Uncharacterized protein	ZKSCAN1	Zinc finger protein with KRAB and SCAN domains 1 OS=Homo sapiens GN=ZKSCAN1 PE=1 SV=3	Zinc finger protein with KRAB and SCAN domains 1 OS=Mus musculus GN=Zkscan1 PE=2 SV=1	63.346	1.12694	0.718118	1.15031	1.14002	0.783394	1.04396	1.18335	0.633299	1.17913	0.632836	0.00233643	0.618729	0.00446504	1.0228	0.609484
F1RNP2	Uncharacterized protein	AZGP1	Zinc-alpha-2-glycoprotein OS=Homo sapiens GN=AZGP1 PE=1 SV=2	Zinc-alpha-2-glycoprotein OS=Mus musculus GN=Azgp1 PE=1 SV=2	34.507	1.40873	0.467985	1.11306							0.42045		0.332203		1.26564
F1RNP4	P2X purinoceptor	P2RX4			43.717	0.966396	1.05031	0.984694	0.997751	1.04548	0.961955	1.09875	0.847714	1.06148	0.978518	0.789181	0.961019	0.641435	1.01821	0.734857
F1RNP8	Uncharacterized protein	ANAPC5	Anaphase-promoting complex subunit 5 OS=Homo sapiens GN=ANAPC5 PE=1 SV=2	Anaphase-promoting complex subunit 5 OS=Mus musculus GN=Anapc5 PE=2 SV=1	84.9	1.0691	0.929333	1.00148							0.927962		0.869266		1.06752
F1RNR7	Uncharacterized protein	PSMD9	26S proteasome non-ATPase regulatory subunit 9 OS=Homo sapiens GN=PSMD9 PE=1 SV=3	26S proteasome non-ATPase regulatory subunit 9 OS=Mus musculus GN=Psmd9 PE=1 SV=1	24.416	0.763172	1.18114	1.0508	0.779238	1.25686	0.975719	0.754148	1.28532	0.940335	1.25497	0.00502243	1.62126	0.00285993	0.774072	0.0167615
F1RNS2	Uncharacterized protein	DIABLO	Diablo homolog, mitochondrial OS=Homo sapiens GN=DIABLO PE=1 SV=1	Diablo homolog, mitochondrial OS=Mus musculus GN=Diablo PE=1 SV=2	26.863				0.504291	2.02284	0.552107				3.66386		4.01126		0.913394
F1RNS7	Uncharacterized protein	ARPC1B	Actin-related protein 2/3 complex subunit 1B OS=Homo sapiens GN=ARPC1B PE=1 SV=3	Actin-related protein 2/3 complex subunit 1B OS=Mus musculus GN=Arpc1b PE=2 SV=4	28.414	1.18543	0.654109	1.14694	1.11907	0.557824	1.28085	1.09193	0.657162	1.25736	0.507196	0.000433136	0.550312	0.000330581	0.921652	0.135236
F1RNS8	Uncharacterized protein	PDAP1	28 kDa heat- and acid-stable phosphoprotein OS=Homo sapiens GN=PDAP1 PE=1 SV=1	28 kDa heat- and acid-stable phosphoprotein OS=Mus musculus GN=Pdap1 PE=1 SV=1	20.688	0.501068	2.02839	0.515237	0.443402	2.1112	0.529971	0.531392	1.75163	0.679446	3.41588	0.00169176	3.99171	0.00372911	0.855744	0.253557
F1RNT9	Uncharacterized protein	LNPEP	Leucyl-cystinyl aminopeptidase OS=Homo sapiens GN=LNPEP PE=1 SV=3	Leucyl-cystinyl aminopeptidase OS=Mus musculus GN=Lnpep PE=1 SV=1	117.24	1.012	0.947101	1.03586	0.946839	0.928757	1.07038	0.962731	0.963896	1.09489	0.887109	0.00715635	0.971994	0.304807	0.912669	0.0239087
F1RNU1	Uncharacterized protein	ERAP1	Endoplasmic reticulum aminopeptidase 1 OS=Homo sapiens GN=ERAP1 PE=1 SV=3	Endoplasmic reticulum aminopeptidase 1 OS=Mus musculus GN=Erap1 PE=2 SV=2	108.26				0.916012	1.04614	1.03625	1.00637	1.00345	0.968909	1.02216	0.642072	1.06617	0.372034	0.958718	0.544414
F1RNU6	Uncharacterized protein	---	SUMO-activating enzyme subunit 2 OS=Homo sapiens GN=UBA2 PE=1 SV=2	SUMO-activating enzyme subunit 2 OS=Mus musculus GN=Uba2 PE=2 SV=1	25.831	1.0971	0.973323	0.954791	1.13053	0.941785	0.943855	0.936917	1.21168	0.83	1.14591	0.258038	0.988067	0.910194	1.15975	0.123466
F1RNV8	Uncharacterized protein	TTC37	Tetratricopeptide repeat protein 37 OS=Homo sapiens GN=TTC37 PE=1 SV=1	Protein Ttc37 OS=Mus musculus GN=Ttc37 PE=4 SV=1	47.326				1.20964	0.779793	1.00215	1.13572	0.776661	1.09846	0.74095	0.111208	0.663632	0.0590635	1.11651	0.189814
F1RNW3	Uncharacterized protein	LSM14A	Protein LSM14 homolog A OS=Homo sapiens GN=LSM14A PE=1 SV=3	Protein LSM14 homolog A OS=Mus musculus GN=Lsm14a PE=1 SV=1	37.08	0.847085	1.14495	1.00719	0.777319	1.43263	0.822473	1.01742	1.03516	0.941022	1.30391	0.126648	1.36752	0.093754	0.953489	0.657942
F1RNW4	Uncharacterized protein	LOC100739263	Xaa-Pro dipeptidase OS=Homo sapiens GN=PEPD PE=1 SV=3	Xaa-Pro dipeptidase OS=Mus musculus GN=Pepd PE=2 SV=3	28.386	0.869431	1.28262	0.855431	0.788073	1.17958	1.05515	0.804849	1.39101	0.734918	1.45652	0.0290609	1.56485	0.008822	0.93077	0.585
F1RNW7	Uncharacterized protein	GPATCH1	G patch domain-containing protein 1 OS=Homo sapiens GN=GPATCH1 PE=1 SV=1	G patch domain-containing protein 1 OS=Mus musculus GN=Gpatch1 PE=2 SV=1	104.23	0.988585	1.04569	0.968632							1.07955		1.05776		1.0206
F1RNX2	Programmed cell death protein 5	PDCD5			14.227	0.45161	2.05911	0.532355	0.404863	2.08847	0.595239	0.425552	2.13081	0.398922	4.11289	0.000416984	4.89725	1.77753e-06	0.839836	0.292571
F1RNX8	Uncharacterized protein	ARRDC3	Arrestin domain-containing protein 3 OS=Homo sapiens GN=ARRDC3 PE=1 SV=1	Arrestin domain-containing protein 3 OS=Mus musculus GN=Arrdc3 PE=2 SV=1	46.323				1.06341	0.681961	1.22237				0.557898		0.641299		0.869951
F1RNY8	Uncharacterized protein	POP4	Ribonuclease P protein subunit p29 OS=Homo sapiens GN=POP4 PE=1 SV=2	Ribonuclease P protein subunit p29 OS=Mus musculus GN=Pop4 PE=2 SV=1	25.618	1.3115	0.688138	1.00053							0.687775		0.524696		1.31081
F1RNY9	Uncharacterized protein	---	Protein C19orf12 OS=Homo sapiens GN=C19orf12 PE=1 SV=3	Protein 1600014C10Rik OS=Mus musculus GN=1600014C10Rik PE=2 SV=1	6.5879				1.05474	0.824949	1.10422				0.747085		0.782137		0.955184
F1RNZ0	Uncharacterized protein	PLEKHF1	Pleckstrin homology domain-containing family F member 1 OS=Homo sapiens GN=PLEKHF1 PE=2 SV=3	Pleckstrin homology domain-containing family F member 1 OS=Mus musculus GN=Plekhf1 PE=2 SV=1	31.761	1.38071	0.488758	1.11968				1.29798	0.603944	1.12233	0.487376	0.0634653	0.407925	0.0110339	1.19477	0.118895
F1RNZ1	Cytochrome b-c1 complex subunit Rieske, mitochondrial	UQCRFS1			29.453	0.88446	1.25845	0.904606	0.908818	1.13812	0.968249	0.978656	1.03814	0.96414	1.21069	0.0770556	1.2391	0.0566266	0.977067	0.571225
F1RNZ3	Uncharacterized protein	MBLAC2	Metallo-beta-lactamase domain-containing protein 2 OS=Homo sapiens GN=MBLAC2 PE=1 SV=3	Metallo-beta-lactamase domain-containing protein 2 OS=Mus musculus GN=Mblac2 PE=2 SV=2	31.488				0.891319	1.23952	0.888337	0.952848	0.984977	1.05798	1.14293	0.471064	1.20623	0.365456	0.947518	0.655582
F1RNZ9	Myocyte-specific enhancer factor 2C	MEF2C			46.872	0.870953	1.10814	1.01904							1.08743		1.27233		0.854676
F1RP01	Uncharacterized protein	RASA1	Ras GTPase-activating protein 1 OS=Homo sapiens GN=RASA1 PE=1 SV=1	Protein Rasa1 OS=Mus musculus GN=Rasa1 PE=2 SV=1	115.87	1.12193	0.719766	1.14493	1.10161	0.794981	1.15494	1.08575	0.725386	1.19509	0.640961	0.000356254	0.676923	0.00141346	0.946874	0.0349628
F1RP02	Uncharacterized protein	SHCBP1	SHC SH2 domain-binding protein 1 OS=Homo sapiens GN=SHCBP1 PE=1 SV=3	SHC SH2 domain-binding protein 1 OS=Mus musculus GN=Shcbp1 PE=1 SV=1	23.003	0.905602	1.36141	0.755628							1.80169		1.50332		1.19848
F1RP04	Uncharacterized protein	GPT2	Alanine aminotransferase 2 OS=Homo sapiens GN=GPT2 PE=1 SV=1	Alanine aminotransferase 2 OS=Mus musculus GN=Gpt2 PE=1 SV=1	58.054	0.62554	1.67812	0.746316	0.62427	1.69208	0.708343	0.591633	1.63151	0.750356	2.26833	5.14512e-06	2.71619	7.74092e-06	0.835116	0.00252021
F1RP05	Uncharacterized protein	DNAJA2	DnaJ homolog subfamily A member 2 OS=Homo sapiens GN=DNAJA2 PE=1 SV=1	DnaJ homolog subfamily A member 2 OS=Mus musculus GN=Dnaja2 PE=1 SV=1	45.703	1.05421	0.871234	1.0713	1.01934	0.878761	1.09443	1.02091	0.891425	1.07849	0.814192	2.8613e-05	0.853598	0.00130737	0.953835	0.0281204
F1RP07	Uncharacterized protein	PHKB	Phosphorylase b kinase regulatory subunit beta OS=Homo sapiens GN=PHKB PE=1 SV=3	Phosphorylase b kinase regulatory subunit beta OS=Mus musculus GN=Phkb PE=1 SV=1	124.38				1.12642	0.73239	1.12019	1.1503	0.629508	1.23163	0.579084	0.0230438	0.598185	0.0593998	0.968068	0.621437
F1RP11	Uncharacterized protein	TMTC4	Transmembrane and TPR repeat-containing protein 4 OS=Homo sapiens GN=TMTC4 PE=2 SV=2	Transmembrane and TPR repeat-containing protein 4 OS=Mus musculus GN=Tmtc4 PE=2 SV=1	82.928	0.917699	1.17116	0.885598	0.932151	1.17931	0.926506	0.855775	1.26063	0.960886	1.30224	0.00193657	1.33466	0.00143244	0.975707	0.521395
F1RP13	Uncharacterized protein	GGACT	Gamma-glutamylaminecyclotransferase OS=Homo sapiens GN=GGACT PE=1 SV=2	Gamma-glutamylaminecyclotransferase OS=Mus musculus GN=Ggact PE=1 SV=1	16.819	1.34848	0.46007	1.17539	1.40721	0.507226	1.06153	1.16552	0.545852	1.30101	0.427694	0.00541933	0.385888	0.00426672	1.10834	0.272279
F1RP17	T-complex protein 1 subunit gamma	CCT3			61.11	1.1416	0.76338	1.0708	1.13246	0.746122	1.08193	1.12039	0.84936	1.01865	0.743797	0.00387755	0.694917	0.0068085	1.07034	0.0516211
F1RP22	Uncharacterized protein	---	Propionyl-CoA carboxylase alpha chain, mitochondrial OS=Homo sapiens GN=PCCA PE=1 SV=4	Propionyl-CoA carboxylase alpha chain, mitochondrial OS=Mus musculus GN=Pcca PE=1 SV=2	14.537	0.953886	0.908525	1.12586				0.989821	0.980619	1.02858	0.87686	0.170484	0.971928	0.588987	0.902186	0.247561
F1RP25	Uncharacterized protein	CLYBL	Citrate lyase subunit beta-like protein, mitochondrial OS=Homo sapiens GN=CLYBL PE=2 SV=2	Citrate lyase subunit beta-like protein, mitochondrial OS=Mus musculus GN=Clybl PE=1 SV=2	33.259	0.90292	1.20002	0.90575	0.88924	1.20476	0.933042	0.807147	1.29156	0.959594	1.32088	0.00291406	1.42205	0.000974788	0.928859	0.143388
F1RP39	Uncharacterized protein	IQGAP3	Ras GTPase-activating-like protein IQGAP3 OS=Homo sapiens GN=IQGAP3 PE=1 SV=2	Protein Iqgap3 OS=Mus musculus GN=Iqgap3 PE=2 SV=1	185.66	0.975242	1.14023	0.853107	1.06296	0.982843	0.957461	0.956249	1.12929	0.920482	1.19088	0.0544322	1.08613	0.239258	1.09645	0.122379
F1RP42	Uncharacterized protein	STK24	Serine/threonine-protein kinase 24 OS=Homo sapiens GN=STK24 PE=1 SV=1	Serine/threonine-protein kinase 24 OS=Mus musculus GN=Stk24 PE=1 SV=1	37.943	1.16004	0.711012	1.06076	1.09912	0.738819	1.13952	1.15525	0.873429	0.984329	0.729527	0.0133088	0.680429	0.0103251	1.07216	0.223691
F1RP44	Uncharacterized protein	IPO5	Importin-5 OS=Homo sapiens GN=IPO5 PE=1 SV=4	Importin-5 OS=Mus musculus GN=Ipo5 PE=1 SV=3	120.35	1.12838	0.89519	0.938417	1.12913	0.873369	1.01108	1.03196	1.03009	0.943756	0.967302	0.603921	0.850789	0.0582413	1.13695	0.0339067
F1RP45	Uncharacterized protein	CISD1	CDGSH iron-sulfur domain-containing protein 1 OS=Homo sapiens GN=CISD1 PE=1 SV=1	CDGSH iron-sulfur domain-containing protein 1 OS=Mus musculus GN=Cisd1 PE=1 SV=1	11.978	0.798163	1.33421	0.878754	0.853467	1.29126	0.877388	0.922402	1.07467	0.979407	1.35261	0.0414875	1.43749	0.02769	0.940956	0.336567
F1RP50	Uncharacterized protein	---	UDP-glucose:glycoprotein glucosyltransferase 2 OS=Homo sapiens GN=UGGT2 PE=1 SV=4	Protein Uggt2 OS=Mus musculus GN=Uggt2 PE=2 SV=1	146.52	0.773501	1.34501	0.902002	0.889286	1.19968	0.965568	0.842457	1.08704	1.04761	1.2458	0.0647895	1.44965	0.0229599	0.859378	0.0674021
F1RP70	Uncharacterized protein	RBM26	RNA-binding protein 26 OS=Homo sapiens GN=RBM26 PE=1 SV=3	RNA-binding protein 26 OS=Mus musculus GN=Rbm26 PE=1 SV=2	113.65	0.974954	1.0223	1.01524	0.986662	1.07073	0.961848	1.0638	0.937035	1.01455	1.01285	0.786092	1.00154	0.975905	1.01129	0.753133
F1RP77	Uncharacterized protein	MYCBP2	E3 ubiquitin-protein ligase MYCBP2 OS=Homo sapiens GN=MYCBP2 PE=1 SV=3	Probable E3 ubiquitin-protein ligase MYCBP2 (Fragment) OS=Mus musculus GN=Mycbp2 PE=2 SV=1	490.67	1.03801	0.960366	1.00151	1.07239	0.947182	0.980263	1.02323	0.95473	1.02386	0.952306	0.0526835	0.913404	0.0194448	1.04259	0.0923464
F1RP79	Uncharacterized protein	CLN5	Ceroid-lipofuscinosis neuronal protein 5 OS=Homo sapiens GN=CLN5 PE=1 SV=2	Ceroid-lipofuscinosis neuronal protein 5 homolog OS=Mus musculus GN=Cln5 PE=2 SV=1	41.095				1.04111	0.870429	1.0766	1.15563	0.889143	0.968339	0.860451	0.222488	0.800991	0.155212	1.07423	0.437337
F1RPB4	Uncharacterized protein	---	Putative RNA exonuclease NEF-sp OS=Homo sapiens GN=44M2.3 PE=2 SV=1	Protein 2610020H08Rik OS=Mus musculus GN=2610020H08Rik PE=2 SV=1	89.161	1.14289	0.964115	0.902184	1.13914	1.06778	0.812774	1.08287	1.02348	0.901017	1.16797	0.0255244	0.908016	0.0539874	1.28629	0.00364536
F1RPB6	Uncharacterized protein	LYRM1	LYR motif-containing protein 1 OS=Homo sapiens GN=LYRM1 PE=2 SV=1	LYR motif-containing protein 1 OS=Mus musculus GN=Lyrm1 PE=2 SV=1	14.33	1.02721	1.02623	0.951128							1.07896		0.999045		1.07999
F1RPB7	Uncharacterized protein	DRG1	Developmentally-regulated GTP-binding protein 1 OS=Homo sapiens GN=DRG1 PE=1 SV=1	Developmentally-regulated GTP-binding protein 1 OS=Mus musculus GN=Drg1 PE=1 SV=1	39.65	0.899012	1.24431	0.904546	0.958106	1.16447	0.893343	0.922367	1.17806	0.893604	1.33266	0.00586717	1.29047	0.00142911	1.03269	0.226517
F1RPC2	Uncharacterized protein	LIMK2	LIM domain kinase 2 OS=Homo sapiens GN=LIMK2 PE=1 SV=1	LIM domain kinase 2 OS=Mus musculus GN=Limk2 PE=2 SV=1	69.586	1.10374	0.787768	1.09934	1.27464	0.786506	0.93669	1.22288	0.659476	1.13557	0.704298	0.0174137	0.620268	0.00257875	1.13547	0.148003
F1RPD2	Uncharacterized protein	LOC100524613	Cytochrome b-c1 complex subunit 2, mitochondrial OS=Homo sapiens GN=UQCRC2 PE=1 SV=3	Cytochrome b-c1 complex subunit 2, mitochondrial OS=Mus musculus GN=Uqcrc2 PE=1 SV=1	48.82	0.964291	1.07517	0.960497	0.889209	1.10947	1.01038	0.904737	0.973229	1.04962	1.04548	0.406494	1.14489	0.0621431	0.913174	0.0651524
F1RPD4	Uncharacterized protein	LOC100620271	Cytochrome b-c1 complex subunit 2, mitochondrial OS=Homo sapiens GN=UQCRC2 PE=1 SV=3	Cytochrome b-c1 complex subunit 2, mitochondrial OS=Mus musculus GN=Uqcrc2 PE=1 SV=1	21.97	0.867366	1.22239	0.917788	1.01052	1.09411	0.907372	0.897819	1.08938	0.955661	1.22478	0.0306943	1.22703	0.0270202	0.998159	0.973191
F1RPD9	Uncharacterized protein	MORC2	MORC family CW-type zinc finger protein 2 OS=Homo sapiens GN=MORC2 PE=1 SV=2	MORC family CW-type zinc finger protein 2A OS=Mus musculus GN=Morc2a PE=1 SV=2	117.44	1.12034	0.79957	1.07336	1.13374	0.808631	1.04625				0.758727	0.019928	0.713463	0.00132767	1.06344	0.0806875
F1RPE5	Pescadillo homolog	PES1			69.169	1.09311	0.916449	0.991313	1.11132	0.997016	0.925433	1.05778	0.943783	1.00423	0.978183	0.565839	0.875863	0.0125511	1.11682	0.0232657
F1RPE7	Uncharacterized protein	POLR3E	DNA-directed RNA polymerase III subunit RPC5 OS=Homo sapiens GN=POLR3E PE=1 SV=1	DNA-directed RNA polymerase III subunit RPC5 OS=Mus musculus GN=Polr3e PE=1 SV=2	76.929	0.962977	1.04063	0.982108	1.15697	0.8595	0.980114	1.04471	0.958391	1.03254	0.954508	0.483026	0.903266	0.255194	1.05673	0.423145
F1RPE8	Uncharacterized protein	EEF2K	Eukaryotic elongation factor 2 kinase OS=Homo sapiens GN=EEF2K PE=1 SV=2	Eukaryotic elongation factor 2 kinase OS=Mus musculus GN=Eef2k PE=1 SV=1	81.73	1.10143	0.842119	1.05172				1.04681	0.854236	1.10237	0.787506	0.0577234	0.789647	0.0652245	0.997288	0.944673
F1RPF8	Uncharacterized protein	TAF9B	Transcription initiation factor TFIID subunit 9B OS=Homo sapiens GN=TAF9B PE=1 SV=1	Transcription initiation factor TFIID subunit 9B OS=Mus musculus GN=Taf9b PE=2 SV=1	27.56	1.08395	0.856	1.055	1.00839	0.779867	1.18644	1.05909	0.924549	1.00313	0.789138	0.0324509	0.812463	0.0244517	0.971291	0.639075
F1RPJ7	Uncharacterized protein	UPRT	Uracil phosphoribosyltransferase homolog OS=Homo sapiens GN=UPRT PE=2 SV=1	Uracil phosphoribosyltransferase homolog OS=Mus musculus GN=Uprt PE=2 SV=1	33.498	1.07515	0.786432	1.12121	1.11371	0.752992	1.11365	1.05058	0.848332	1.10481	0.714967	0.00643414	0.737088	0.00195772	0.969989	0.205445
F1RPL4	Uncharacterized protein	---	Zinc finger protein 184 OS=Homo sapiens GN=ZNF184 PE=1 SV=4	Zinc finger protein 184 OS=Mus musculus GN=Zfp184 PE=2 SV=1	84.72							1.05005	0.762756	1.19047	0.640718		0.726401		0.882045
F1RPM1	Uncharacterized protein	---	Histone deacetylase 8 OS=Homo sapiens GN=HDAC8 PE=1 SV=2	Histone deacetylase 8 OS=Mus musculus GN=Hdac8 PE=1 SV=2	15.44
F1RPM5	Uncharacterized protein	MBD2	Methyl-CpG-binding domain protein 2 OS=Homo sapiens GN=MBD2 PE=1 SV=1	Methyl-CpG-binding domain protein 2 OS=Mus musculus GN=Mbd2 PE=2 SV=2	38.272	1.06865	0.995	0.941804				1.03615	0.998173	0.968835	1.0432	0.197372	0.946965	0.177464	1.10162	0.047076
F1RPM9	Uncharacterized protein	LOC100516342	Tetratricopeptide repeat protein 21B OS=Homo sapiens GN=TTC21B PE=1 SV=2	Tetratricopeptide repeat protein 21B OS=Mus musculus GN=Ttc21b PE=2 SV=1	108.74	1.13364	0.855441	1.01008	1.05214	0.974762	0.974496	1.04171	1.02801	0.934067	0.979296	0.743219	0.885584	0.122002	1.10582	0.0516471
F1RPN4	Uncharacterized protein	---	Cordon-bleu protein-like 1 OS=Homo sapiens GN=COBLL1 PE=1 SV=2	Cordon-bleu protein-like 1 (Fragment) OS=Mus musculus GN=Cobll1 PE=2 SV=1	31.471							1.09726	0.66824	1.24147	0.538264		0.609008		0.883837
F1RPN5	Uncharacterized protein	GRB14	Growth factor receptor-bound protein 14 OS=Homo sapiens GN=GRB14 PE=1 SV=2	Growth factor receptor-bound protein 14 OS=Mus musculus GN=Grb14 PE=1 SV=1	51.836	0.988416	0.980311	0.969775	0.993002	1.09592	0.914292	0.729597	1.3931	0.857589	1.26541	0.180982	1.27972	0.17648	0.988824	0.920519
F1RPN9	Malic enzyme	ME2			66.529	1.03709	0.998058	0.954112	1.00882	1.00311	0.989176	1.02331	0.954849	1.02368	0.99631	0.892545	0.963114	0.116434	1.03447	0.225806
F1RPP3	Uncharacterized protein	CXXC1	CXXC-type zinc finger protein 1 OS=Homo sapiens GN=CXXC1 PE=1 SV=2	CpG-binding protein OS=Mus musculus GN=Cxxc1 PE=2 SV=1	76.289	1.10906	0.788921	1.09906	1.01937	0.911695	1.05302	1.03564	0.890281	1.07669	0.802441	0.0207674	0.818851	0.0181044	0.97996	0.533932
F1RPP4	Uncharacterized protein	MBD1	Methyl-CpG-binding domain protein 1 OS=Homo sapiens GN=MBD1 PE=1 SV=2	Methyl-CpG-binding domain protein 1 OS=Mus musculus GN=Mbd1 PE=1 SV=2	72.979	0.977782	1.10253	0.954878	1.01726	1.15833	0.844573	0.992003	1.02388	0.98353	1.18029	0.044269	1.09966	0.116187	1.07333	0.245591
F1RPQ3	Uncharacterized protein	PSMD14	26S proteasome non-ATPase regulatory subunit 14 OS=Homo sapiens GN=PSMD14 PE=1 SV=1	26S proteasome non-ATPase regulatory subunit 14 OS=Mus musculus GN=Psmd14 PE=1 SV=2	34.799	1.23966	0.560778	1.19457	1.18297	0.617833	1.17122	1.16652	0.734072	1.14037	0.54552	0.00543628	0.532907	0.00310584	1.02367	0.371732
F1RPR2	Uncharacterized protein	CTIF	CBP80/20-dependent translation initiation factor OS=Homo sapiens GN=CTIF PE=1 SV=1	CBP80/20-dependent translation initiation factor OS=Mus musculus GN=Ctif PE=1 SV=2	67.222	0.938922	0.994919	1.0605							0.938165		1.05964		0.885362
F1RPR3	Mothers against decapentaplegic homolog	SMAD2			49.139	0.985553	1.00044	1.01281	1.02573	0.923804	1.0317	0.988289	1.00007	0.99042	0.963553	0.286078	0.974911	0.445446	0.98835	0.540324
F1RPR6	Uncharacterized protein	RBMS1	RNA-binding motif, single-stranded-interacting protein 1 OS=Homo sapiens GN=RBMS1 PE=1 SV=3	RNA-binding motif, single-stranded-interacting protein 1 OS=Mus musculus GN=Rbms1 PE=2 SV=1	40.73	0.993548	1.04463	0.965061	1.00925	1.04952	0.947864	1.11016	0.898426	1.00059	1.02714	0.654943	0.961329	0.553098	1.06845	0.20262
F1RPR7	Integrin beta	---			19.553	0.778355	1.30888	0.920042	0.806445	1.26553	0.943148	0.83634	1.13763	1.00897	1.29242	0.0168405	1.53318	0.00862066	0.842968	0.0133362
F1RPS8	ATP synthase subunit alpha	ATP5A1			57.626	0.929864	1.04073	0.998822	0.947605	1.03628	0.984397	0.999974	0.978933	1.01732	1.01847	0.466472	1.06204	0.109373	0.958975	0.180774
F1RPT0	Uncharacterized protein	HAUS1	HAUS augmin-like complex subunit 1 OS=Homo sapiens GN=HAUS1 PE=1 SV=1	HAUS augmin-like complex subunit 1 OS=Mus musculus GN=Haus1 PE=2 SV=2	31.447	0.917585	1.22003	0.996384	1.044	0.977029	0.979954	1.05114	0.975319	0.977905	1.07384	0.465598	1.05299	0.603372	1.01979	0.698274
F1RPT3	Uncharacterized protein	TANC1	Protein TANC1 OS=Homo sapiens GN=TANC1 PE=1 SV=3	Protein TANC1 OS=Mus musculus GN=Tanc1 PE=2 SV=2	192.35	1.3095	0.607989	1.07569	1.27122	0.490098	1.2012				0.482274	0.0208901	0.425496	0.0333654	1.13344	0.227267
F1RPT4	Uncharacterized protein	DAPL1	Death-associated protein-like 1 OS=Homo sapiens GN=DAPL1 PE=1 SV=2	Death-associated protein-like 1 OS=Mus musculus GN=Dapl1 PE=1 SV=1	11.889	0.664131	1.56272	0.77363	0.649105	1.75882	0.652273	0.743203	1.49688	0.739743	2.22494	0.00264465	2.34309	0.00331416	0.949573	0.478964
F1RPU0	Glycerol-3-phosphate dehydrogenase	GPD2			80.92	0.989731	0.984378	1.08782	1.02065	0.858028	1.07654	1.19645	0.820152	1.01283	0.838024	0.0561045	0.830277	0.0937881	1.00933	0.896018
F1RPU6	Uncharacterized protein	MPZL1	Myelin protein zero-like protein 1 OS=Homo sapiens GN=MPZL1 PE=1 SV=1	Myelin protein zero-like protein 1 OS=Mus musculus GN=Mpzl1 PE=1 SV=1	29.241				0.725107	1.55189	0.765133				2.02826		2.14022		0.947688
F1RPU8	Mitochondrial pyruvate carrier	MPC2			14.325
F1RPV1	Uncharacterized protein	TIPRL	TIP41-like protein OS=Homo sapiens GN=TIPRL PE=1 SV=2	TIP41-like protein OS=Mus musculus GN=Tiprl PE=2 SV=1	32.405	1.20001	0.513771	1.24661	1.22615	0.537934	1.21114	1.12762	0.648586	1.19803	0.465097	0.00174089	0.478445	0.000469471	0.9721	0.378765
F1RPV8	Uncharacterized protein	NME7	Nucleoside diphosphate kinase 7 OS=Homo sapiens GN=NME7 PE=1 SV=1	Nucleoside diphosphate kinase 7 OS=Mus musculus GN=Nme7 PE=2 SV=1	29.425	1.20565	0.667789	1.11593				1.19309	0.63628	1.16672	0.571297	0.00766739	0.543648	0.00734691	1.05086	0.247408
F1RPW7	Uncharacterized protein	INCENP	Inner centromere protein OS=Homo sapiens GN=INCENP PE=1 SV=3	Inner centromere protein OS=Mus musculus GN=Incenp PE=1 SV=2	101.13	0.891071	1.31654	0.809969	0.393049	2.29706	0.412194				2.95673	0.213869	2.81407	0.210838	1.05069	0.931808
F1RPW8	Uncharacterized protein	ASRGL1	Isoaspartyl peptidase/L-asparaginase OS=Homo sapiens GN=ASRGL1 PE=1 SV=2	Isoaspartyl peptidase/L-asparaginase OS=Mus musculus GN=Asrgl1 PE=1 SV=1	32.403	0.658722	1.54128	0.836656	0.717993	1.4281	0.875796	0.600667	1.62379	0.78682	1.8378	0.00210743	2.32285	0.000604911	0.791183	0.017231
F1RPW9	Elongation factor 1-gamma	EEF1G			50.311	1.01173	0.871829	1.10655	1.02479	0.80747	1.14707	0.92937	1.02098	1.04356	0.818964	0.0692979	0.910445	0.29909	0.89952	0.0598202
F1RPX0	Uncharacterized protein	TUT1	Speckle targeted PIP5K1A-regulated poly(A) polymerase OS=Homo sapiens GN=TUT1 PE=1 SV=2	Speckle targeted PIP5K1A-regulated poly(A) polymerase OS=Mus musculus GN=Tut1 PE=1 SV=1	93.83
F1RPX1	Uncharacterized protein	MTA2	Metastasis-associated protein MTA2 OS=Homo sapiens GN=MTA2 PE=1 SV=1	Metastasis-associated protein MTA2 OS=Mus musculus GN=Mta2 PE=1 SV=1	75.026	1.11664	0.859332	1.01277	1.13511	0.894459	0.952886	1.08717	0.920494	1.0298	0.892779	0.0244391	0.800942	0.00078189	1.11466	0.0205798
F1RPX2	Uncharacterized protein	EML3	Echinoderm microtubule-associated protein-like 3 OS=Homo sapiens GN=EML3 PE=1 SV=1	Echinoderm microtubule-associated protein-like 3 OS=Mus musculus GN=Eml3 PE=1 SV=1	95.644	1.18063	0.743719	1.06933				1.10417	0.740962	1.16278	0.665147	0.0789589	0.649806	0.060352	1.02361	0.706595
F1RPY1	Uncharacterized protein	ATL3	Atlastin-3 OS=Homo sapiens GN=ATL3 PE=1 SV=1	Atlastin-3 OS=Mus musculus GN=Atl3 PE=2 SV=1	58.977	0.91125	1.08796	1.00851	0.892399	1.1685	0.964216	0.960909	0.93335	1.0731	1.04727	0.574917	1.15382	0.168423	0.907654	0.0780074
F1RPY3	Reticulon	RTN3			25.308	0.85935	1.05627	1.07712				0.884478	1.05778	1.04789	0.994842	0.771599	1.2123	0.0424462	0.820621	0.0108326
F1RPY5	Uncharacterized protein	MARK2	Serine/threonine-protein kinase MARK2 OS=Homo sapiens GN=MARK2 PE=1 SV=2	Serine/threonine-protein kinase MARK2 OS=Mus musculus GN=Mark2 PE=4 SV=2	58.882	1.06532	0.918081	1.01523	0.983267	1.07187	0.951953	1.04772	0.991127	0.965293	1.01657	0.761945	0.962783	0.503224	1.05587	0.162665
F1RPY8	Uncharacterized protein	C11orf84		Protein 2700081O15Rik OS=Mus musculus GN=2700081O15Rik PE=2 SV=1	41.215
F1RPY9	Uncharacterized protein	NAA40	N-alpha-acetyltransferase 40 OS=Homo sapiens GN=NAA40 PE=2 SV=1	N-alpha-acetyltransferase 40 OS=Mus musculus GN=Naa40 PE=2 SV=1	27.267	0.976926	1.16671	0.899127	0.970559	1.22487	0.826487	0.972153	1.0801	0.943797	1.30054	0.00871667	1.18908	0.0482061	1.09374	0.134381
F1RQ01	Uncharacterized protein	FERMT3	Fermitin family homolog 3 OS=Homo sapiens GN=FERMT3 PE=1 SV=1	Fermitin family homolog 3 OS=Mus musculus GN=Fermt3 PE=1 SV=1	75.557	1.38888	0.53162	1.07299							0.495458		0.382769		1.29441
F1RQ06	Uncharacterized protein	FKBP2	Peptidyl-prolyl cis-trans isomerase FKBP2 OS=Homo sapiens GN=FKBP2 PE=1 SV=2	Peptidyl-prolyl cis-trans isomerase FKBP2 OS=Mus musculus GN=Fkbp2 PE=1 SV=1	15.374	0.618269	1.53229	0.830667	0.565749	1.59945	0.875503	0.614753	1.55374	0.829957	1.84749	1.59761e-05	2.60482	4.0724e-06	0.709259	0.000442157
F1RQ08	Phosphoinositide phospholipase C	PLCB3			138.48	0.974172	1.00507	1.03753	0.958245	1.00915	1.02117	0.971941	0.931044	1.07218	0.940714	0.119906	1.01409	0.647378	0.927648	0.0277449
F1RQ14	Uncharacterized protein	---	CD2-associated protein OS=Homo sapiens GN=CD2AP PE=1 SV=1	CD2-associated protein OS=Mus musculus GN=Cd2ap PE=1 SV=3	27.857							1.1422	0.879091	0.990603	0.887431		0.76965		1.15303
F1RQ21	Uncharacterized protein	LOC100519722	Antigen peptide transporter 2 OS=Homo sapiens GN=TAP2 PE=1 SV=1	Antigen peptide transporter 2 OS=Mus musculus GN=Tap2 PE=2 SV=1	80.221				0.809977	1.2113	0.98773				1.22635		1.49548		0.820039
F1RQ73	Phospholipid-transporting ATPase	ATP11C			129.47	1.10492	0.79474	1.09187	1.12998	0.798119	1.0858				0.731449	0.000756566	0.71272	0.0224458	1.02628	0.248177
F1RQ75	Coagulation factor IX	F9			52.036	1.35184	0.597705	1.04639	1.3439	0.509098	1.11787	1.29365	0.57438	1.1557	0.506386	0.000238708	0.421413	4.7933e-05	1.20164	0.00770563
F1RQ90	Uncharacterized protein	RBMX	RNA-binding motif protein, X chromosome OS=Homo sapiens GN=RBMX PE=1 SV=3	RNA-binding motif protein, X chromosome OS=Mus musculus GN=Rbmx PE=1 SV=1	42.274	0.747941	1.38469	0.858383	0.8263	1.44559	0.725083	0.854236	1.26287	0.859853	1.67524	0.00161012	1.68548	0.00218014	0.993926	0.932908
F1RQ91	40S ribosomal protein S4	RPS4X			29.597	1.14705	0.677476	1.133	1.1286	0.748528	1.06168	1.18715	0.590094	1.2153	0.591234	0.00189548	0.582217	0.00422675	1.01549	0.739737
F1RQB6	Uncharacterized protein	G3BP1	Ras GTPase-activating protein-binding protein 1 OS=Homo sapiens GN=G3BP1 PE=1 SV=1	Ras GTPase-activating protein-binding protein 1 OS=Mus musculus GN=G3bp1 PE=1 SV=1	51.798	0.89079	1.22905	0.833444	0.960495	1.14681	0.924593	0.963176	1.13948	0.87171	1.33676	0.00168195	1.24903	0.00370219	1.07024	0.158645
F1RQC1	Uncharacterized protein	FAM114A2	Protein FAM114A2 OS=Homo sapiens GN=FAM114A2 PE=1 SV=4	Protein FAM114A2 OS=Mus musculus GN=Fam114a2 PE=2 SV=2	54.634	0.815313	1.48697	0.738874	0.84726	1.40557	0.782268	0.646142	1.64797	0.677919	2.06475	0.00321679	1.96668	0.0015218	1.04986	0.635916
F1RQC3	Uncharacterized protein	SAP30L	Histone deacetylase complex subunit SAP30L OS=Homo sapiens GN=SAP30L PE=1 SV=1	Histone deacetylase complex subunit SAP30L OS=Mus musculus GN=Sap30l PE=1 SV=1	20.805	1.07863	0.8984	1.02107	1.07937	0.838836	1.06941				0.831023	0.0476313	0.805021	0.0894826	1.0323	0.395524
F1RQC5	Uncharacterized protein	LARP1	La-related protein 1 OS=Homo sapiens GN=LARP1 PE=1 SV=2	La-related protein 1 OS=Mus musculus GN=Larp1 PE=1 SV=2	110.37	0.825958	1.36195	0.827962	0.907822	1.26358	0.798396	0.756901	1.51498	0.709232	1.77279	0.00573384	1.6624	0.00580471	1.0664	0.412769
F1RQC8	Uncharacterized protein	GEMIN5	Gem-associated protein 5 OS=Homo sapiens GN=GEMIN5 PE=1 SV=3	Gem-associated protein 5 OS=Mus musculus GN=Gemin5 PE=2 SV=1	169.32	1.20783	0.793738	1.00874	1.181	0.779453	1.01834	1.15453	0.83415	1.02363	0.789108	0.00367158	0.679395	7.4715e-05	1.16149	0.00553503
F1RQE0	Uncharacterized protein	C9orf78			33.62							1.06811	1.18082	0.757879	1.55807		1.10553		1.40934
F1RQE2	Uncharacterized protein	FNBP1	Formin-binding protein 1 OS=Homo sapiens GN=FNBP1 PE=1 SV=2	Formin-binding protein 1 OS=Mus musculus GN=Fnbp1 PE=1 SV=2	74.803	0.982473	1.03136	0.987335				0.925964	1.11892	0.949186	1.11038	0.210479	1.12672	0.167117	0.985498	0.725192
F1RQE9	Uncharacterized protein	CYFIP2	Cytoplasmic FMR1-interacting protein 2 OS=Homo sapiens GN=CYFIP2 PE=1 SV=2	Cytoplasmic FMR1-interacting protein 2 OS=Mus musculus GN=Cyfip2 PE=1 SV=2	148.61	1.1672	0.73241	1.08978	1.11136	0.696892	1.16015	1.09833	0.771908	1.13731	0.649854	0.000193416	0.651845	0.000205822	0.996946	0.912855
F1RQF4	tRNA(His) guanylyltransferase	THG1L			33.728	1.3262	0.363283	1.28432	1.34237	0.390798	1.22359	1.28565	0.440989	1.29577	0.314187	1.08249e-05	0.302226	1.13905e-05	1.03958	0.153455
F1RQF6	Uncharacterized protein	CLINT1	Clathrin interactor 1 OS=Homo sapiens GN=CLINT1 PE=1 SV=1	Clathrin interactor 1 OS=Mus musculus GN=Clint1 PE=4 SV=1	69.973	0.825877	1.41712	0.828234	0.765755	1.41837	0.845641				1.69397	0.00917649	1.7815	0.0306785	0.950867	0.390059
F1RQG3	Uncharacterized protein	NTMT1	N-terminal Xaa-Pro-Lys N-methyltransferase 1 OS=Homo sapiens GN=NTMT1 PE=1 SV=3	N-terminal Xaa-Pro-Lys N-methyltransferase 1 OS=Mus musculus GN=Ntmt1 PE=2 SV=3	25.363	1.03065	0.969934	0.924984	0.927474	1.15699	0.927998	0.918206	1.15361	0.921736	1.18229	0.112052	1.14053	0.14986	1.03662	0.446544
F1RQG8	Uncharacterized protein	MTO1	Protein MTO1 homolog, mitochondrial OS=Homo sapiens GN=MTO1 PE=1 SV=2	Mitochondrial translation optimization 1 homolog (S. cerevisiae), isoform CRA_b OS=Mus musculus GN=Mto1 PE=3 SV=1	77.029	0.85828	1.28551	0.868347							1.48041		1.49777		0.988406
F1RQH2	Uncharacterized protein	PRPF40A	Pre-mRNA-processing factor 40 homolog A OS=Homo sapiens GN=PRPF40A PE=1 SV=2	Pre-mRNA-processing factor 40 homolog A OS=Mus musculus GN=Prpf40a PE=1 SV=1	108.82	1.00142	0.96934	1.01729	1.05528	0.934764	0.996008	1.05202	0.918784	1.01286	0.93283	0.0302166	0.908057	0.0149493	1.02728	0.25103
F1RQH8	Uncharacterized protein	WDR33	pre-mRNA 3' end processing protein WDR33 OS=Homo sapiens GN=WDR33 PE=1 SV=2	pre-mRNA 3' end processing protein WDR33 OS=Mus musculus GN=Wdr33 PE=2 SV=1	145.44	0.992057	0.966261	0.942951	1.02899	0.86837	1.02118	1.02178	0.953359	1.00896	0.93774	0.193924	0.91625	0.0959077	1.02345	0.453096
F1RQI0	Uncharacterized protein	---	Collagen alpha-1(XII) chain OS=Homo sapiens GN=COL12A1 PE=1 SV=2	Collagen alpha-1(XII) chain OS=Mus musculus GN=Col12a1 PE=2 SV=3	102.04	1.38596	0.307606	1.2531	1.26203	0.417002	1.21433	1.38919	0.416401	1.20563	0.310643	0.000497891	0.282625	7.32913e-05	1.09913	0.0882506
F1RQI1	Uncharacterized protein	COX7A2	Cytochrome c oxidase subunit 7A2, mitochondrial OS=Homo sapiens GN=COX7A2 PE=1 SV=1	Cytochrome c oxidase subunit 7A2, mitochondrial OS=Mus musculus GN=Cox7a2 PE=1 SV=2	9.2437	0.792112	1.29734	0.932613	0.86909	1.21338	0.958924	0.863742	1.16786	0.933456	1.30215	0.0137895	1.45689	0.00198815	0.893788	0.0442329
F1RQI7	Unconventional myosin-VI	MYO6			144.93	1.04021	0.825716	1.09955	1.04317	0.898194	1.04058	1.10847	0.772716	1.14333	0.760367	0.0056586	0.782188	0.00939045	0.972102	0.461061
F1RQI9	Uncharacterized protein	SFT2D3	Vesicle transport protein SFT2C OS=Homo sapiens GN=SFT2D3 PE=2 SV=1	Vesicle transport protein SFT2C OS=Mus musculus GN=Sft2d3 PE=4 SV=1	22.215	0.938965	1.09138	0.972199							1.12259		1.16232		0.965816
F1RQJ0	Uncharacterized protein	SAP130	Histone deacetylase complex subunit SAP130 OS=Homo sapiens GN=SAP130 PE=1 SV=1	Histone deacetylase complex subunit SAP130 OS=Mus musculus GN=Sap130 PE=1 SV=2	113.23	0.965465	0.961591	1.01922	0.995991	1.03214	0.96905	1.08543	0.907852	1.01377	0.966539	0.462359	0.952312	0.395226	1.01494	0.73141
F1RQJ4	Uncharacterized protein	---	UDP-glucose:glycoprotein glucosyltransferase 1 OS=Homo sapiens GN=UGGT1 PE=1 SV=3	UDP-glucose:glycoprotein glucosyltransferase 1 OS=Mus musculus GN=Uggt1 PE=1 SV=4	170.8	0.82926	1.22093	0.957619	0.846751	1.11592	1.02545	0.88002	1.13447	0.959576	1.17966	0.0143402	1.35809	0.0042715	0.868615	0.0120308
F1RQK1	Uncharacterized protein	IMPG1	Interphotoreceptor matrix proteoglycan 1 OS=Homo sapiens GN=IMPG1 PE=1 SV=2	Interphotoreceptor matrix proteoglycan 1 OS=Mus musculus GN=Impg1 PE=1 SV=1	89.037	0.962473	1.06047	0.978988							1.08323		1.10181		0.98313
F1RQK4	Uncharacterized protein	---	PH-interacting protein OS=Homo sapiens GN=PHIP PE=1 SV=2	PH-interacting protein OS=Mus musculus GN=Phip PE=4 SV=1	207.05	1.14486	0.722759	1.12122	1.08238	0.969232	0.945828	0.999937	0.835245	1.16404	0.782163	0.0743742	0.78311	0.0609647	0.998791	0.987751
F1RQL3	Uncharacterized protein	---	2-oxoisovalerate dehydrogenase subunit beta, mitochondrial OS=Homo sapiens GN=BCKDHB PE=1 SV=2	2-oxoisovalerate dehydrogenase subunit beta, mitochondrial OS=Mus musculus GN=Bckdhb PE=1 SV=2	30.636	0.861766	1.16171	0.938949	0.838471	1.31739	0.868077	0.862382	1.23805	0.88863	1.37894	0.00756556	1.45053	0.0114816	0.950648	0.159066
F1RQL4	Uncharacterized protein	FAM46A	Protein FAM46A OS=Homo sapiens GN=FAM46A PE=2 SV=2	MCG11933 OS=Mus musculus GN=Fam46a PE=4 SV=2	58.827
F1RQM0	Uncharacterized protein	TPBG	Trophoblast glycoprotein OS=Homo sapiens GN=TPBG PE=1 SV=1	Trophoblast glycoprotein OS=Mus musculus GN=Tpbg PE=1 SV=3	45.751	1.19164	0.429015	1.34721				1.18723	0.445287	1.38129	0.320433	0.00275667	0.367528	0.00382884	0.871861	0.0580891
F1RQM2	Phosphoacetylglucosamine mutase	PGM3			59.474	1.1634	0.674759	1.13408	1.13079	0.810501	1.08772	1.11656	0.746621	1.17266	0.657507	0.00230136	0.654369	0.00515985	1.0048	0.859102
F1RQM9	Uncharacterized protein	KIAA1109		Protein 4932438A13Rik (Fragment) OS=Mus musculus GN=4932438A13Rik PE=4 SV=1	555.06	0.819382	1.28657	0.902945				0.942124	1.01848	1.03441	1.18979	0.380809	1.30857	0.257417	0.909231	0.431736
F1RQP0	Uncharacterized protein	PRDX5	Peroxiredoxin-5, mitochondrial OS=Homo sapiens GN=PRDX5 PE=1 SV=4	Peroxiredoxin-5, mitochondrial OS=Mus musculus GN=Prdx5 PE=1 SV=2	17.266	1.13779	0.783791	1.06913	1.12389	0.795565	1.09378	1.09916	0.855261	1.06249	0.754828	0.00252506	0.724408	0.00116659	1.04199	0.039217
F1RQP1	Uncharacterized protein	TRMT112	tRNA methyltransferase 112 homolog OS=Homo sapiens GN=TRMT112 PE=1 SV=1	tRNA methyltransferase 112 homolog OS=Mus musculus GN=Trmt112 PE=2 SV=1	14.19	1.12247	0.783807	1.07358	1.0839	0.854861	1.05114	1.0471	0.890977	1.04899	0.797064	0.016245	0.777522	0.00476362	1.02513	0.348022
F1RQQ2	Uncharacterized protein	CYP39A1	24-hydroxycholesterol 7-alpha-hydroxylase OS=Homo sapiens GN=CYP39A1 PE=2 SV=2	24-hydroxycholesterol 7-alpha-hydroxylase OS=Mus musculus GN=Cyp39a1 PE=2 SV=1	54.35
F1RQQ7	Alpha-1,4 glucan phosphorylase	PYGB			82.683	0.944673	1.04958	1.00523	1.12153	0.780349	1.07671	1.10185	0.954881	0.934684	0.923155	0.448423	0.879028	0.263999	1.0502	0.510559
F1RQR0	Uncharacterized protein	SF1	Splicing factor 1 OS=Homo sapiens GN=SF1 PE=1 SV=4	Splicing factor 1 OS=Mus musculus GN=Sf1 PE=2 SV=1	68.315	0.750558	1.43765	0.827636	0.789408	1.36389	0.891907	0.754648	1.39562	0.794155	1.66972	0.000161678	1.82914	8.12924e-05	0.912844	0.110454
F1RQR4	Uncharacterized protein	EHD1	EH domain-containing protein 1 OS=Homo sapiens GN=EHD1 PE=1 SV=2	EH domain-containing protein 1 OS=Mus musculus GN=Ehd1 PE=1 SV=1	62.765	1.14774	0.801158	1.0521	1.10624	0.793111	1.03912	1.03246	0.95109	1.01568	0.819259	0.0622621	0.774504	0.0211518	1.05779	0.211536
F1RQS3	Uncharacterized protein	---	Runt-related transcription factor 2 OS=Homo sapiens GN=RUNX2 PE=1 SV=2	Runt-related transcription factor 2 OS=Mus musculus GN=Runx2 PE=2 SV=1	15.638	1.09761	0.653615	1.22769							0.532395		0.595492		0.894041
F1RQS5	Uncharacterized protein	CDC5L	Cell division cycle 5-like protein OS=Homo sapiens GN=CDC5L PE=1 SV=2	Cell division cycle 5-like protein OS=Mus musculus GN=Cdc5l PE=1 SV=2	92.292	1.10185	0.920201	0.957979	1.06108	0.944678	0.928961	1.05214	0.954947	0.942689	0.996536	0.818277	0.877065	0.00330607	1.13622	0.00461724
F1RQS8	Uncharacterized protein	ARL2	ADP-ribosylation factor-like protein 2 OS=Homo sapiens GN=ARL2 PE=1 SV=4	ADP-ribosylation factor-like protein 2 OS=Mus musculus GN=Arl2 PE=1 SV=1	20.894	1.12923	0.693018	1.16272	1.18233	0.738582	1.06351	1.14815	0.837302	1.02677	0.69748	0.0051071	0.655808	0.00594882	1.06354	0.225802
F1RQS9	Uncharacterized protein	SNX15	Sorting nexin-15 OS=Homo sapiens GN=SNX15 PE=1 SV=1	Sorting nexin-15 OS=Mus musculus GN=Snx15 PE=2 SV=1	39.155	1.22447	0.543003	1.2129	0.982535	0.848487	1.14961	1.11818	0.659928	1.23066	0.570922	0.0222372	0.616935	0.0219761	0.925417	0.330689
F1RQT4	Uncharacterized protein	ZFPL1	Zinc finger protein-like 1 OS=Homo sapiens GN=ZFPL1 PE=1 SV=2	Zinc finger protein-like 1 OS=Mus musculus GN=Zfpl1 PE=1 SV=1	34.242	0.983115	1.21143	0.821987	0.963888	1.14943	0.90131				1.36996	0.0275877	1.21256	0.0727636	1.12981	0.201116
F1RQT6	Uncharacterized protein	VPS51	Vacuolar protein sorting-associated protein 51 homolog OS=Homo sapiens GN=VPS51 PE=1 SV=2	Vacuolar protein sorting-associated protein 51 homolog OS=Mus musculus GN=Vps51 PE=2 SV=2	85.967	1.16025	0.748134	1.09421	0.996547	0.904708	1.08719	1.09618	0.80146	1.07147	0.754503	0.0264446	0.754477	0.0158729	1.00003	0.99945
F1RQT7	Alanine--tRNA ligase, cytoplasmic	AARS2			106.95	0.88811	1.19044	0.945925	0.932896	1.20824	0.884358	0.890914	1.1558	0.933643	1.28603	0.000502765	1.31069	0.000189699	0.981184	0.508244
F1RQU1	Uncharacterized protein	SLC35B2	Adenosine 3'-phospho 5'-phosphosulfate transporter 1 OS=Homo sapiens GN=SLC35B2 PE=1 SV=1	Adenosine 3'-phospho 5'-phosphosulfate transporter 1 OS=Mus musculus GN=Slc35b2 PE=2 SV=1	49.06	0.949193	1.13679	0.921293	0.94381	1.10192	0.952673	0.966414	0.991671	1.02844	1.113	0.119938	1.12974	0.102292	0.985188	0.699337
F1RQU2	Uncharacterized protein	HSP90AB1	Heat shock protein HSP 90-beta OS=Homo sapiens GN=HSP90AB1 PE=1 SV=4	Heat shock protein HSP 90-beta OS=Mus musculus GN=Hsp90ab1 PE=1 SV=3	83.252	1.12288	0.791317	1.08066	1.11106	0.752278	1.10553	1.05945	0.957079	1.01076	0.782205	0.0485474	0.759302	0.0420505	1.03016	0.409405
F1RQU7	Uncharacterized protein	TM7SF2	Delta(14)-sterol reductase OS=Homo sapiens GN=TM7SF2 PE=2 SV=3	Delta(14)-sterol reductase OS=Mus musculus GN=Tm7sf2 PE=2 SV=2	46.359	1.0704	0.758837	1.15629	1.1754	0.785037	1.02889	1.12534	0.733136	1.15126	0.682466	0.00761763	0.675444	0.00191826	1.0104	0.834425
F1RQU8	Uncharacterized protein	ZNHIT2	Zinc finger HIT domain-containing protein 2 OS=Homo sapiens GN=ZNHIT2 PE=1 SV=1	Zinc finger HIT domain-containing protein 2 OS=Mus musculus GN=Znhit2 PE=2 SV=2	42.419	1.01077	0.934263	1.0503				1.00712	1.05413	0.939629	0.999227	0.993337	0.985384	0.846419	1.01405	0.842502
F1RQV4	DNA polymerase alpha subunit B	POLA2			65.882	1.05329	1.01612	0.936532	1.09189	1.03773	0.910604	0.996236	1.05648	0.947215	1.11308	0.00276848	0.990106	0.756126	1.1242	0.0391224
F1RQW2	Uncharacterized protein	C4A	Complement C4-A OS=Homo sapiens GN=C4A PE=1 SV=2	Complement C4-B OS=Mus musculus GN=C4b PE=1 SV=3	192.43	1.5007	0.525201	0.968798	1.1454	0.703552	1.13156	1.24747	0.761773	1.03107	0.635661	0.0153437	0.511234	0.0106332	1.24338	0.123019
F1RQW4	Uncharacterized protein	SKIV2L	Helicase SKI2W OS=Homo sapiens GN=SKIV2L PE=1 SV=3	Protein Skiv2l OS=Mus musculus GN=Skiv2l PE=2 SV=1	137.64	1.18879	0.657034	1.17609	1.15187	0.680378	1.14838	1.11588	0.763632	1.13518	0.607299	0.00210138	0.607846	0.000688034	0.9991	0.968398
F1RQW5	Uncharacterized protein	NELFE	Negative elongation factor E OS=Homo sapiens GN=NELFE PE=1 SV=3	Negative elongation factor E OS=Mus musculus GN=Nelfe PE=1 SV=2	42.905	1.02995	0.949782	1.04569							0.908281		0.922162		0.984947
F1RQW6	Complement factor B	CFB			85.878	1.2582	0.66315	1.06586	1.10624	0.723964	1.16723	1.17813	0.761131	1.07523	0.649346	0.000919592	0.606409	0.00173537	1.07081	0.231275
F1RQW7	Uncharacterized protein	C2	Complement C2 OS=Homo sapiens GN=C2 PE=1 SV=2	Complement C2 OS=Mus musculus GN=C2 PE=2 SV=2	83.282	1.28975	0.85181	0.87066	1.33245	0.443021	1.18663				0.629387	0.285427	0.493796	0.186885	1.27459	0.320474
F1RQW9	Uncharacterized protein	EHMT2	Histone-lysine N-methyltransferase EHMT2 OS=Homo sapiens GN=EHMT2 PE=1 SV=3	Histone-lysine N-methyltransferase EHMT2 OS=Mus musculus GN=Ehmt2 PE=2 SV=1	129.02	1.0135	1.01479	1.00938	1.15473	0.990661	0.869441	1.02824	1.0438	0.922503	1.08851	0.169954	0.953948	0.391189	1.14106	0.0960443
F1RQX3	Sialidase-1	NEU1			45.104	0.962183	1.04931	0.989457				0.955887	1.14299	0.897925	1.16156	0.145394	1.14297	0.208193	1.01626	0.79411
F1RQX4	Uncharacterized protein (Fragment)	---	Abhydrolase domain-containing protein 16A OS=Homo sapiens GN=ABHD16A PE=1 SV=3	Abhydrolase domain-containing protein 16A OS=Mus musculus GN=Abhd16a PE=1 SV=3	22.75	0.952653	1.03411	0.982814	0.923382	1.10702	0.964426	0.931893	1.00442	1.04277	1.05202	0.254229	1.12024	0.056779	0.939103	0.111076
F1RQX8	Large proline-rich protein BAG6	BAG6			113.39	1.09907	0.758289	1.11899							0.677656		0.689935		0.982203
F1RQY4	Uncharacterized protein	UBTF	Nucleolar transcription factor 1 OS=Homo sapiens GN=UBTF PE=1 SV=1	Nucleolar transcription factor 1 OS=Mus musculus GN=Ubtf PE=4 SV=1	76.226	1.03872	0.894244	1.04956	1.13279	0.903969	0.944768	1.094	0.875793	1.01937	0.887283	0.0596312	0.818862	0.0128243	1.08356	0.113819
F1RQZ0	Uncharacterized protein	GRN	Granulins OS=Homo sapiens GN=GRN PE=1 SV=2	Granulins OS=Mus musculus GN=Grn PE=1 SV=2	62.952	1.12309	0.791627	1.14043	1.16577	0.706797	1.10674	1.28696	0.710972	1.04897	0.670299	0.000708508	0.617872	0.00329431	1.08485	0.191195
F1RQZ1	Uncharacterized protein	---	G patch domain-containing protein 8 OS=Homo sapiens GN=GPATCH8 PE=1 SV=2	G patch domain-containing protein 8 OS=Mus musculus GN=Gpatch8 PE=2 SV=1	53.924	0.707611	1.50297	0.807137	0.717916	1.44299	0.867755				1.75889	0.00447335	2.06657	0.0213316	0.851115	0.143341
F1RQZ9	Uncharacterized protein	EFTUD2	116 kDa U5 small nuclear ribonucleoprotein component OS=Homo sapiens GN=EFTUD2 PE=1 SV=1	116 kDa U5 small nuclear ribonucleoprotein component OS=Mus musculus GN=Eftud2 PE=4 SV=1	109.48	1.06849	0.922416	1.00474	1.06738	0.920506	1.01196	1.03783	0.946087	1.0185	0.918889	0.00339055	0.878787	0.000709529	1.04563	0.0308616
F1RR05	Uncharacterized protein	DCAKD	Dephospho-CoA kinase domain-containing protein OS=Homo sapiens GN=DCAKD PE=1 SV=1	Dephospho-CoA kinase domain-containing protein OS=Mus musculus GN=Dcakd PE=2 SV=1	26.256	0.979999	1.01123	1.00802	0.940123	1.21806	0.890499	0.963109	1.03811	0.99946	1.12748	0.193635	1.13324	0.184036	0.994912	0.910874
F1RR06	Glycylpeptide N-tetradecanoyltransferase	NMT1			56.751	1.066	0.895291	1.05408	0.968966	1.02741	1.03267	0.921858	1.01368	1.04842	0.936596	0.253317	0.993087	0.914581	0.943116	0.295246
F1RR15	Uncharacterized protein	ZHX1	Zinc fingers and homeoboxes protein 1 OS=Homo sapiens GN=ZHX1 PE=1 SV=1	Zinc fingers and homeoboxes protein 1 OS=Mus musculus GN=Zhx1 PE=1 SV=2	97.88	1.09838	0.812103	1.08197							0.750582		0.739362		1.01517
F1RR16	Uncharacterized protein	ATAD2	ATPase family AAA domain-containing protein 2 OS=Homo sapiens GN=ATAD2 PE=1 SV=1	ATPase family AAA domain-containing protein 2 OS=Mus musculus GN=Atad2 PE=3 SV=1	158.07	0.801932	1.50128	0.649225	0.770141	1.65823	0.637415	0.768469	1.43451	0.814597	2.18634	0.000762256	1.9628	0.0065436	1.11389	0.296432
F1RR17	Uncharacterized protein	WDYHV1	Protein N-terminal glutamine amidohydrolase OS=Homo sapiens GN=WDYHV1 PE=1 SV=2	Protein N-terminal glutamine amidohydrolase OS=Mus musculus GN=Wdyhv1 PE=1 SV=1	23.897
F1RR19	Uncharacterized protein	HEXIM1	Protein HEXIM1 OS=Homo sapiens GN=HEXIM1 PE=1 SV=1	Protein HEXIM1 OS=Mus musculus GN=Hexim1 PE=1 SV=1	39.153	0.687824	1.60654	0.760252	0.697621	1.5648	0.836391	0.7104	1.544	0.756348	2.00398	3.81803e-05	2.24985	0.000108122	0.890715	0.0734462
F1RR20	Uncharacterized protein	HEXIM2	Protein HEXIM2 OS=Homo sapiens GN=HEXIM2 PE=1 SV=1	Protein HEXIM2 OS=Mus musculus GN=Hexim2 PE=2 SV=1	33.022	0.656398	1.60865	0.757266	0.70817	1.5619	0.771824	0.859675	1.13098	0.997665	1.70239	0.0409344	1.93393	0.0313578	0.880277	0.3685
F1RR38	Uncharacterized protein	TTC1	Tetratricopeptide repeat protein 1 OS=Homo sapiens GN=TTC1 PE=1 SV=1	Tetratricopeptide repeat protein 1 OS=Mus musculus GN=Ttc1 PE=2 SV=1	33.704							0.788885	1.25544	0.938377	1.33788		1.59141		0.84069
F1RR44	Serine/threonine-protein phosphatase 2A activator	PTPA			40.884	0.966205	1.18043	0.90166	0.928164	1.00581	1.0278	0.908886	1.09646	0.948239	1.14074	0.102981	1.17103	0.0744605	0.974132	0.586151
F1RR45	Uncharacterized protein	CRAT	Carnitine O-acetyltransferase OS=Homo sapiens GN=CRAT PE=1 SV=5	Carnitine O-acetyltransferase OS=Mus musculus GN=Crat PE=1 SV=3	70.833	0.792642	1.36359	0.848557	0.838175	1.36759	0.850196	0.796175	1.27367	0.885194	1.54989	0.0015185	1.65013	0.000751727	0.939258	0.0525548
F1RR46	Uncharacterized protein	DOLPP1	Dolichyldiphosphatase 1 OS=Homo sapiens GN=DOLPP1 PE=1 SV=1	Dolichyldiphosphatase 1 OS=Mus musculus GN=Dolpp1 PE=2 SV=1	27.081
F1RR48	Uncharacterized protein	SH3GLB2	Endophilin-B2 OS=Homo sapiens GN=SH3GLB2 PE=1 SV=1	Endophilin-B2 OS=Mus musculus GN=Sh3glb2 PE=2 SV=2	43.489	0.938878	1.1945	0.877926	1.10832	0.829635	1.06555	1.19903	0.883074	0.934784	1.01006	0.944206	0.895564	0.46184	1.12784	0.269386
F1RR49	Uncharacterized protein	NUP188	Nucleoporin NUP188 homolog OS=Homo sapiens GN=NUP188 PE=1 SV=1	Nucleoporin NUP188 homolog OS=Mus musculus GN=Nup188 PE=1 SV=2	196.1	1.09412	0.811714	1.07886	1.1227	0.787169	1.07351	1.11464	0.818873	1.07602	0.748906	0.000981543	0.725735	2.10209e-05	1.03193	0.0521023
F1RR54	Uncharacterized protein	SLU7	Pre-mRNA-splicing factor SLU7 OS=Homo sapiens GN=SLU7 PE=1 SV=2	Pre-mRNA-splicing factor SLU7 OS=Mus musculus GN=Slu7 PE=1 SV=1	68.331	0.773919	1.45318	0.792067				1.1856	0.791111	1.03857	1.22596	0.644928	1.14533	0.755821	1.0704	0.818233
F1RR63	Uncharacterized protein	SPOUT1			43.3	1.02995	1.05075	0.926175	1.05772	0.979527	0.965177	1.03134	1.03719	0.93438	1.08555	0.0458664	0.983474	0.525762	1.10379	0.00355236
F1RR64	Uncharacterized protein	ENDOG	Endonuclease G, mitochondrial OS=Homo sapiens GN=ENDOG PE=1 SV=4	Endonuclease G, mitochondrial OS=Mus musculus GN=Endog PE=2 SV=1	32.665	0.80427	1.38075	0.830585	0.616187	1.90129	0.556797	0.835289	1.48055	0.671975	2.31266	0.0157455	2.11132	0.0214223	1.09536	0.566783
F1RR65	Uncharacterized protein	TBC1D13	TBC1 domain family member 13 OS=Homo sapiens GN=TBC1D13 PE=1 SV=3	TBC1 domain family member 13 OS=Mus musculus GN=Tbc1d13 PE=2 SV=1	46.285	1.15551	0.720712	1.11335	1.14034	0.631187	1.1497	1.06871	0.788869	1.09014	0.638427	0.00646715	0.636269	0.0034836	1.00339	0.912007
F1RR69	Uncharacterized protein	SETSIP	Protein SETSIP OS=Homo sapiens GN=SETSIP PE=1 SV=1	Protein SET OS=Mus musculus GN=Set PE=1 SV=1	33.615	0.319054	2.20011	0.53038	0.389833	2.04669	0.632232	0.354018	2.07248	0.522457	3.75016	2.48967e-05	5.94528	0.000118889	0.630779	0.0125551
F1RR73	Uncharacterized protein	NUDCD2	NudC domain-containing protein 2 OS=Homo sapiens GN=NUDCD2 PE=1 SV=1	NudC domain-containing protein 2 OS=Mus musculus GN=Nudcd2 PE=1 SV=1	17.646	1.07526	0.714249	1.16474	1.32325	0.579337	1.07485	1.25791	0.624571	1.13835	0.567847	0.00100306	0.524599	0.00591101	1.08244	0.338711
F1RR77	Uncharacterized protein	WDR34	WD repeat-containing protein 34 OS=Homo sapiens GN=WDR34 PE=1 SV=2	WD repeat domain 34 OS=Mus musculus GN=Wdr34 PE=4 SV=1	57.841	1.09417	0.937968	0.97065	1.15961	0.787004	1.04162	1.04419	0.838875	1.12005	0.818514	0.0375169	0.777399	0.0136233	1.05289	0.372163
F1RR78	Uncharacterized protein	SPTAN1	Spectrin alpha chain, non-erythrocytic 1 OS=Homo sapiens GN=SPTAN1 PE=1 SV=3	Spectrin alpha chain, non-erythrocytic 1 OS=Mus musculus GN=Sptan1 PE=2 SV=1	282.1	0.810289	1.32431	0.860923	0.791536	1.29532	0.925404	0.774292	1.44066	0.785915	1.5785	0.00121401	1.70879	0.00437813	0.923753	0.242425
F1RR80	Uncharacterized protein	GLE1	Nucleoporin GLE1 OS=Homo sapiens GN=GLE1 PE=1 SV=2	Nucleoporin GLE1 OS=Mus musculus GN=Gle1 PE=1 SV=2	79.975	1.05742	0.967944	1.01136	1.0419	0.942985	1.024	1.08263	0.935378	1.08357	0.91259	0.0387684	0.894515	0.00217583	1.02021	0.465192
F1RR82	Uncharacterized protein	ODF2	Outer dense fiber protein 2 OS=Homo sapiens GN=ODF2 PE=1 SV=1	Outer dense fiber protein 2 OS=Mus musculus GN=Odf2 PE=1 SV=1	87.427	0.852634	1.02532	1.16504	0.881122	1.17621	0.94218	0.932302	0.999342	1.06242	1.00985	0.908347	1.2006	0.067197	0.841122	0.108025
F1RR83	Uncharacterized protein	CERCAM	Probable inactive glycosyltransferase 25 family member 3 OS=Homo sapiens GN=CERCAM PE=2 SV=1	Probable inactive glycosyltransferase 25 family member 3 OS=Mus musculus GN=Cercam PE=2 SV=1	61.601	0.746051	1.5231	0.753571							2.02118		2.04155		0.990022
F1RR85	Uncharacterized protein	SLC27A4	Long-chain fatty acid transport protein 4 OS=Homo sapiens GN=SLC27A4 PE=1 SV=1	Long-chain fatty acid transport protein 4 OS=Mus musculus GN=Slc27a4 PE=1 SV=1	58.606	0.930331	1.04953	1.01838	0.947888	1.06167	0.993351	0.90068	0.975672	1.11484	0.987304	0.788124	1.11083	0.0428354	0.888801	0.0744822
F1RR89	Uncharacterized protein	---	Arginine--tRNA ligase, cytoplasmic OS=Homo sapiens GN=RARS PE=1 SV=2	Arginine--tRNA ligase, cytoplasmic OS=Mus musculus GN=Rars PE=2 SV=2	35.194	1.18544	0.629402	1.18523	1.16687	0.638187	1.18427	1.15434	0.70321	1.14271	0.561127	0.000183277	0.562018	0.000616387	0.998414	0.917578
F1RR91	Uncharacterized protein	FBLL1	rRNA/tRNA 2'-O-methyltransferase fibrillarin-like protein 1 OS=Homo sapiens GN=FBLL1 PE=3 SV=1	rRNA/tRNA 2'-O-methyltransferase fibrillarin-like protein 1 OS=Mus musculus GN=Fbll1 PE=2 SV=1	37.993	1.19021	0.797875	1.01102	1.22813	0.854618	0.919232				0.856101	0.147781	0.683317	0.0124894	1.25286	0.0821448
F1RRA7	Uncharacterized protein	HSPA4L	Heat shock 70 kDa protein 4L OS=Homo sapiens GN=HSPA4L PE=1 SV=3	Heat shock 70 kDa protein 4L OS=Mus musculus GN=Hspa4l PE=1 SV=2	97.843	1.20365	0.637088	1.12778	1.18717	0.650081	1.1279	1.09373	0.79289	1.1091	0.618187	0.012304	0.596937	0.00243832	1.0356	0.363526
F1RRB7	Uncharacterized protein	ACAA1	3-ketoacyl-CoA thiolase, peroxisomal OS=Homo sapiens GN=ACAA1 PE=1 SV=2	3-ketoacyl-CoA thiolase A, peroxisomal OS=Mus musculus GN=Acaa1a PE=1 SV=1	44.501	0.493605	1.95282	0.628045	0.549131	1.9473	0.56731	0.631643	1.6719	0.619036	3.07102	0.00411866	3.32782	0.00162111	0.922832	0.373538
F1RRC2	Uncharacterized protein	GOLGA4	Golgin subfamily A member 4 OS=Homo sapiens GN=GOLGA4 PE=1 SV=1	Golgin subfamily A member 4 OS=Mus musculus GN=Golga4 PE=1 SV=2	262.39	1.05676	0.98533	1.00599	0.965237	0.989216	1.04135	0.979839	0.858217	1.08332	0.904844	0.132867	0.943677	0.34445	0.958849	0.303689
F1RRC8	Uncharacterized protein	---	ETS-related transcription factor Elf-2 OS=Homo sapiens GN=ELF2 PE=1 SV=2	ETS-related transcription factor Elf-2 OS=Mus musculus GN=Elf2 PE=1 SV=1	34.312	0.875114	1.19879	0.932297	1.00807	1.06324	0.936844	1.08449	0.867517	1.05477	1.07033	0.56274	1.05454	0.664728	1.01497	0.853096
F1RRD3	Uncharacterized protein	NAA15	N-alpha-acetyltransferase 15, NatA auxiliary subunit OS=Homo sapiens GN=NAA15 PE=1 SV=1	N-alpha-acetyltransferase 15, NatA auxiliary subunit OS=Mus musculus GN=Naa15 PE=4 SV=1	101.42	1.18613	0.76031	1.07659	1.16422	0.689474	1.12538	1.12698	0.807546	1.08717	0.686299	0.00397537	0.649154	0.00193302	1.05722	0.0522894
F1RRD4	Uncharacterized protein	LOC100513756	TPR and ankyrin repeat-containing protein 1 OS=Homo sapiens GN=TRANK1 PE=2 SV=4	TPR and ankyrin repeat-containing protein 1 OS=Mus musculus GN=Trank1 PE=2 SV=3	141.03				1.04487	0.876628	1.02209	1.10693	0.812698	1.08886	0.800267	0.0450211	0.785075	0.035235	1.01935	0.698147
F1RRD6	Uncharacterized protein	PDCD6IP	Programmed cell death 6-interacting protein OS=Homo sapiens GN=PDCD6IP PE=1 SV=1	Programmed cell death 6-interacting protein OS=Mus musculus GN=Pdcd6ip PE=1 SV=3	85.25	1.09025	0.821103	1.0808	1.06456	0.803462	1.09728	1.03712	0.899312	1.04682	0.782621	0.00607567	0.790705	0.00669186	0.989777	0.633957
F1RRD7	Uncharacterized protein	CLASP2	CLIP-associating protein 2 OS=Homo sapiens GN=CLASP2 PE=1 SV=2	CLIP associating protein 2 OS=Mus musculus GN=Clasp2 PE=2 SV=1	91.86	0.826583	1.32592	0.860352	0.996558	1.19008	0.835534	0.879365	1.20737	0.903664	1.43231	0.00509974	1.37775	0.00716806	1.0396	0.576512
F1RRD8	Uncharacterized protein	UBP1	Upstream-binding protein 1 OS=Homo sapiens GN=UBP1 PE=2 SV=1	Upstream-binding protein 1 OS=Mus musculus GN=Ubp1 PE=1 SV=1	56.674	1.03154	0.991308	0.979114	0.999135	1.03732	0.96788	1.09842	0.92195	0.987887	1.00535	0.891188	0.94295	0.253219	1.06617	0.152619
F1RRE0	Uncharacterized protein	DYNC1LI1	Cytoplasmic dynein 1 light intermediate chain 1 OS=Homo sapiens GN=DYNC1LI1 PE=1 SV=3	Cytoplasmic dynein 1 light intermediate chain 1 OS=Mus musculus GN=Dync1li1 PE=1 SV=1	52.428	1.13404	0.739907	1.11542	1.13142	0.742511	1.13731	1.11476	0.799979	1.1034	0.680067	0.000540576	0.675223	0.00137923	1.00717	0.535223
F1RRE7	Uncharacterized protein	ELMOD2	ELMO domain-containing protein 2 OS=Homo sapiens GN=ELMOD2 PE=1 SV=1	ELMO domain-containing protein 2 OS=Mus musculus GN=Elmod2 PE=2 SV=1	38.695	0.91243	1.06651	0.934273	0.918019	1.16542	0.961488	0.903678	1.01595	1.07201	1.09438	0.199741	1.1879	0.0586415	0.921272	0.204661
F1RRF2	Uncharacterized protein	STT3B	Dolichyl-diphosphooligosaccharide--protein glycosyltransferase subunit STT3B OS=Homo sapiens GN=STT3B PE=1 SV=1	Dolichyl-diphosphooligosaccharide--protein glycosyltransferase subunit STT3B OS=Mus musculus GN=Stt3b PE=1 SV=2	93.499	0.902233	1.15879	0.959327	0.887091	1.25733	0.894951	0.956871	1.01363	1.02935	1.18939	0.106458	1.24891	0.0739831	0.952341	0.374248
F1RRF3	Uncharacterized protein	ZNF330	Zinc finger protein 330 OS=Homo sapiens GN=ZNF330 PE=1 SV=1	Zinc finger protein 330 OS=Mus musculus GN=Znf330 PE=2 SV=1	32.575	1.24712	0.732016	1.01925	1.24359	0.766987	0.982342	1.14137	0.827557	1.04265	0.764251	0.00361951	0.640558	0.000762399	1.1931	0.0155144
F1RRG9	Uncharacterized protein	SMARCA5	SWI/SNF-related matrix-associated actin-dependent regulator of chromatin subfamily A member 5 OS=Homo sapiens GN=SMARCA5 PE=1 SV=1	SWI/SNF-related matrix-associated actin-dependent regulator of chromatin subfamily A member 5 OS=Mus musculus GN=Smarca5 PE=1 SV=1	121.99	1.04023	0.900687	1.04705	1.06667	0.923239	1.01136	1.02206	0.939589	1.04184	0.891384	0.00209753	0.883205	0.00223841	1.00926	0.605764
F1RRH2	Anion exchange protein	SLC4A7			136	1.2317	0.664172	1.09542				1.25917	0.517744	1.24353	0.505319	0.030918	0.474499	0.0628353	1.06495	0.488574
F1RRH9	Uncharacterized protein	DPF2	Zinc finger protein ubi-d4 OS=Homo sapiens GN=DPF2 PE=1 SV=2	Zinc finger protein ubi-d4 OS=Mus musculus GN=Dpf2 PE=2 SV=1	45.798	0.817415	1.24362	0.912329	0.903354	1.25021	0.898242	0.922438	1.18221	0.926602	1.34301	0.00189325	1.39075	0.0016281	0.96567	0.436622
F1RRI2	Uncharacterized protein	FRMD8	FERM domain-containing protein 8 OS=Homo sapiens GN=FRMD8 PE=1 SV=1	FERM domain-containing protein 8 OS=Mus musculus GN=Frmd8 PE=1 SV=2	51.137	1.05941	0.740873	1.03208	1.05437	0.891698	1.0329	1.1238	0.827252	1.05898	0.787404	0.0325348	0.759773	0.0134592	1.03637	0.226372
F1RRI4	Uncharacterized protein	SSSCA1	Sjoegren syndrome/scleroderma autoantigen 1 OS=Homo sapiens GN=SSSCA1 PE=1 SV=1	Sjoegren syndrome/scleroderma autoantigen 1 homolog OS=Mus musculus GN=Sssca1 PE=2 SV=1	21.48	0.719845	1.5243	0.776431							1.96322		2.11755		0.927121
F1RRJ3	Protein YIPF	YIPF3			37.988	0.87732	1.24786	0.885386	0.896173	1.13954	0.972057	0.87248	1.06425	1.0524	1.1862	0.0664674	1.30449	0.0351368	0.909318	0.207594
F1RRJ4	Uncharacterized protein	POLR1C	DNA-directed RNA polymerases I and III subunit RPAC1 OS=Homo sapiens GN=POLR1C PE=1 SV=1	DNA-directed RNA polymerases I and III subunit RPAC1 OS=Mus musculus GN=Polr1c PE=1 SV=3	39.721	1.12254	0.841025	1.03342	1.19627	0.801017	1.04904	1.11307	0.843427	1.05928	0.791112	0.000672763	0.72423	0.00173278	1.09235	0.0572007
F1RRJ9	Uncharacterized protein	LTBP3	Latent-transforming growth factor beta-binding protein 3 OS=Homo sapiens GN=LTBP3 PE=1 SV=4	Latent-transforming growth factor beta-binding protein 3 OS=Mus musculus GN=Ltbp3 PE=2 SV=1	133.89	0.959666	1.01652	1.02177	0.974443	0.952985	1.07364	1.12731	0.792789	1.09008	0.867147	0.159483	0.902289	0.310824	0.961052	0.531043
F1RRK0	Uncharacterized protein	SCYL1	N-terminal kinase-like protein OS=Homo sapiens GN=SCYL1 PE=1 SV=1	N-terminal kinase-like protein OS=Mus musculus GN=Scyl1 PE=1 SV=1	89.077	1.18972	0.633428	1.15023	1.16546	0.666637	1.19043	1.15477	0.697445	1.14094	0.573734	4.29609e-05	0.5691	0.000118652	1.00814	0.637517
F1RRK2	Uncharacterized protein	LOC100517325	Signal-induced proliferation-associated protein 1 OS=Homo sapiens GN=SIPA1 PE=1 SV=1	Signal-induced proliferation-associated protein 1 OS=Mus musculus GN=Sipa1 PE=4 SV=1	95.169				0.954101	1.14998	0.909785	0.980812	1.28223	0.736593	1.47731	0.0761797	1.25701	0.15373	1.17525	0.339114
F1RRK4	Histone acetyltransferase	KAT5			58.597	1.01158	1.00255	0.987076	1.07905	1.05269	0.881127				1.10011	0.297678	0.983069	0.717586	1.11906	0.240488
F1RRK5	Uncharacterized protein	RNASEH2C	Ribonuclease H2 subunit C OS=Homo sapiens GN=RNASEH2C PE=1 SV=1	Ribonuclease H2 subunit C OS=Mus musculus GN=Rnaseh2c PE=1 SV=1	18.357				0.968019	1.13867	0.907015				1.2554		1.17629		1.06726
F1RRK9	Uncharacterized protein	XPO5	Exportin-5 OS=Homo sapiens GN=XPO5 PE=1 SV=1	Exportin-5 OS=Mus musculus GN=Xpo5 PE=2 SV=1	136.39	1.32994	0.450629	1.1911	1.24158	0.614218	1.09792	1.20851	0.6259	1.1637	0.489686	0.00297493	0.447285	0.00108034	1.0948	0.0794046
F1RRL4	Uncharacterized protein	LOC100739861	Tight junction-associated protein 1 OS=Homo sapiens GN=TJAP1 PE=1 SV=1	Tight junction-associated protein 1 OS=Mus musculus GN=Tjap1 PE=1 SV=1	58.16	1.05463	0.832207	1.06802	1.05301	0.884297	1.05347	1.05637	0.930299	1.01794	0.843083	0.0140506	0.836534	0.0258479	1.00783	0.637384
F1RRM1	2'-deoxynucleoside 5'-phosphate N-hydrolase 1	DNPH1			19.594	1.12359	0.848434	1.03914	1.18966	0.655444	1.09754	1.16239	0.726874	1.06321	0.697134	0.0216582	0.641824	0.0112312	1.08618	0.0234964
F1RRM3	Uncharacterized protein	ZNF318	Zinc finger protein 318 OS=Homo sapiens GN=ZNF318 PE=1 SV=2	Zinc finger protein 318 OS=Mus musculus GN=Zfp318 PE=2 SV=1	248.79	0.871195	1.16314	0.968507				0.938309	1.04155	1.01493	1.11154	0.294854	1.21839	0.137682	0.912305	0.182353
F1RRN0	Uncharacterized protein	PTK7	Inactive tyrosine-protein kinase 7 OS=Homo sapiens GN=PTK7 PE=1 SV=2	Inactive tyrosine-protein kinase 7 OS=Mus musculus GN=Ptk7 PE=1 SV=1	117.03	1.1194	0.879291	0.983466	1.0515	0.865736	1.07122				0.84929	0.168713	0.803826	0.0902187	1.05656	0.410695
F1RRN1	Uncharacterized protein	KLC4	Kinesin light chain 4 OS=Homo sapiens GN=KLC4 PE=1 SV=3	Kinesin light chain 4 OS=Mus musculus GN=Klc4 PE=1 SV=1	68.308	1.12522	0.737097	1.11112	1.12715	0.8287	1.08224	1.09543	0.792849	1.10307	0.715516	0.00391365	0.704534	0.00272855	1.01559	0.27221
F1RRN2	Uncharacterized protein	MRPL2	39S ribosomal protein L2, mitochondrial OS=Homo sapiens GN=MRPL2 PE=1 SV=2	39S ribosomal protein L2, mitochondrial OS=Mus musculus GN=Mrpl2 PE=2 SV=1	33.216				0.930624	1.3005	0.798562	0.946548	1.18018	0.875936	1.48145	0.0424139	1.3215	0.120177	1.12104	0.220644
F1RRN3	Uncharacterized protein	CUL7	Cullin-7 OS=Homo sapiens GN=CUL7 PE=1 SV=2	Cullin-7 OS=Mus musculus GN=Cul7 PE=1 SV=2	196.03	0.962197	0.948728	0.991602	0.969877	1.09118	0.948442	0.955618	1.00585	1.04904	1.01896	0.729953	1.05474	0.330697	0.96608	0.36569
F1RRP8	Uncharacterized protein	TMEM65	Transmembrane protein 65 OS=Homo sapiens GN=TMEM65 PE=1 SV=2	Transmembrane protein 65 OS=Mus musculus GN=Tmem65 PE=2 SV=1	24.983	0.944591	1.03196	1.02142	0.95572	1.01112	1.03076				0.995565	0.742936	1.07513	0.0478704	0.925996	0.00998273
F1RRR1	Uncharacterized protein	GOSR2	Golgi SNAP receptor complex member 2 OS=Homo sapiens GN=GOSR2 PE=1 SV=2	Golgi SNAP receptor complex member 2 OS=Mus musculus GN=Gosr2 PE=2 SV=2	24.691	1.06868	1.01478	0.972271	1.02237	1.02793	0.899709	1.07988	0.913902	1.01151	1.02536	0.643111	0.932412	0.175807	1.09968	0.0801961
F1RRR5	Uncharacterized protein	---	WASH complex subunit strumpellin OS=Homo sapiens GN=KIAA0196 PE=1 SV=1	WASH complex subunit strumpellin OS=Mus musculus GN=Kiaa0196 PE=2 SV=2	135.29
F1RRS3	Uncharacterized protein	NSF	Vesicle-fusing ATPase OS=Homo sapiens GN=NSF PE=1 SV=3	Vesicle-fusing ATPase OS=Mus musculus GN=Nsf PE=1 SV=2	83.584	1.06987	0.802373	1.11091	0.978733	0.889593	1.08545	1.06196	0.842276	1.11576	0.765142	0.00454377	0.814721	0.00798823	0.939147	0.137497
F1RRS9	Uncharacterized protein	KANSL1	KAT8 regulatory NSL complex subunit 1 OS=Homo sapiens GN=KANSL1 PE=1 SV=2	KAT8 regulatory NSL complex subunit 1 OS=Mus musculus GN=Kansl1 PE=4 SV=1	121.05
F1RRT1	Uncharacterized protein	CDC27	Cell division cycle protein 27 homolog OS=Homo sapiens GN=CDC27 PE=1 SV=2	Cell division cycle protein 27 homolog OS=Mus musculus GN=Cdc27 PE=1 SV=1	75.18				1.17071	0.860595	0.966562				0.890367		0.735108		1.21121
F1RRT3	Uncharacterized protein	FAM49B	Protein FAM49B OS=Homo sapiens GN=FAM49B PE=1 SV=1	Protein FAM49B OS=Mus musculus GN=Fam49b PE=2 SV=1	36.748	1.01925	1.17515	0.844768	0.965559	1.09507	0.941433	0.854454	1.33307	0.821671	1.3817	0.0242213	1.2691	0.0466145	1.08873	0.278302
F1RRT6	Uncharacterized protein	EFR3A	Protein EFR3 homolog A OS=Homo sapiens GN=EFR3A PE=1 SV=2	Protein EFR3 homolog A OS=Mus musculus GN=Efr3a PE=1 SV=1	24.163
F1RRU6	Uncharacterized protein	TLK2	Serine/threonine-protein kinase tousled-like 2 OS=Homo sapiens GN=TLK2 PE=1 SV=2	Serine/threonine-protein kinase tousled-like 2 OS=Mus musculus GN=Tlk2 PE=2 SV=1	85.2	1.14572	0.785198	1.0633	1.12833	0.83056	1.00681	1.11208	0.858293	1.03878	0.795797	0.0018259	0.730644	0.00139033	1.08917	0.013756
F1RRU7	Uncharacterized protein (Fragment)	MRC2	C-type mannose receptor 2 OS=Homo sapiens GN=MRC2 PE=1 SV=2	C-type mannose receptor 2 OS=Mus musculus GN=Mrc2 PE=1 SV=3	161.78	1.06589	0.647492	1.24102	1.06453	0.616645	1.22908	1.06696	0.661665	1.30159	0.510594	9.57634e-05	0.602307	0.000954158	0.84773	0.0134015
F1RRV1	Uncharacterized protein	TANC2	Protein TANC2 OS=Homo sapiens GN=TANC2 PE=1 SV=3	Protein TANC2 OS=Mus musculus GN=Tanc2 PE=1 SV=1	211.55	0.932428	1.32212	0.767053							1.72363		1.41793		1.2156
F1RRV6	Uncharacterized protein	NDRG1	Protein NDRG1 OS=Homo sapiens GN=NDRG1 PE=1 SV=1	Protein NDRG1 OS=Mus musculus GN=Ndrg1 PE=1 SV=1	37.495	1.09135	0.633848	1.2515	1.0609	0.665749	1.23896	1.37683	0.598543	1.05576	0.535257	0.00831988	0.537857	0.0288688	0.995165	0.964361
F1RRW9	Uncharacterized protein	CIZ1	Cip1-interacting zinc finger protein OS=Homo sapiens GN=CIZ1 PE=1 SV=2	CDKN1A interacting zinc finger protein 1 OS=Mus musculus GN=Ciz1 PE=2 SV=1	95.474	1.0563	0.941148	1.00237	1.08102	0.983803	0.940064	1.07253	0.864227	1.06896	0.926209	0.220893	0.86894	0.0517274	1.06591	0.214214
F1RRY6	Uncharacterized protein	PTGES2	Prostaglandin E synthase 2 OS=Homo sapiens GN=PTGES2 PE=1 SV=1	Prostaglandin E synthase 2 OS=Mus musculus GN=Ptges2 PE=1 SV=3	42.705	0.925358	1.20854	0.91636	0.887081	1.13209	1.00849	0.932023	1.10528	0.947081	1.19986	0.010046	1.25559	0.00792457	0.955614	0.257786
F1RRZ3	Uncharacterized protein	---	Serine/threonine-protein kinase 10 OS=Homo sapiens GN=STK10 PE=1 SV=1	Serine/threonine-protein kinase 10 OS=Mus musculus GN=Stk10 PE=1 SV=2	36.011
F1RS09	Uncharacterized protein	---	Torsin-2A OS=Homo sapiens GN=TOR2A PE=2 SV=1	Torsin-2A OS=Mus musculus GN=Tor2a PE=2 SV=1	31.012	0.980479	0.857906	1.14786	0.93047	1.17604	0.908451	1.10767	0.968406	0.933204	1.00429	0.973398	0.994611	0.962665	1.00974	0.922123
F1RS11	Uncharacterized protein	STXBP1	Syntaxin-binding protein 1 OS=Homo sapiens GN=STXBP1 PE=1 SV=1	Syntaxin-binding protein 1 OS=Mus musculus GN=Stxbp1 PE=1 SV=2	68.748	1.1222	0.712645	1.15119	1.21457	0.733528	1.05653	1.14625	0.713505	1.16193	0.640919	0.00526985	0.620059	0.00252025	1.03364	0.435053
F1RS14	Uncharacterized protein	PTRH1	Probable peptidyl-tRNA hydrolase OS=Homo sapiens GN=PTRH1 PE=1 SV=1	Probable peptidyl-tRNA hydrolase OS=Mus musculus GN=Ptrh1 PE=2 SV=1	22.076	1.12495	0.717711	1.14404	1.15405	0.931017	0.919717				0.798896	0.312276	0.723443	0.20227	1.1043	0.511635
F1RS15	Uncharacterized protein	FAM129B	Niban-like protein 1 OS=Homo sapiens GN=FAM129B PE=1 SV=3	Niban-like protein 1 OS=Mus musculus GN=Fam129b PE=2 SV=2	83.279	1.20884	0.623579	1.15346	1.16211	0.662157	1.14943	1.2346	0.605507	1.18283	0.542569	4.69635e-05	0.524537	4.46622e-05	1.03438	0.192516
F1RS19	Uncharacterized protein	SLC2A8	Solute carrier family 2, facilitated glucose transporter member 8 OS=Homo sapiens GN=SLC2A8 PE=1 SV=3	Solute carrier family 2, facilitated glucose transporter member 8 OS=Mus musculus GN=Slc2a8 PE=1 SV=2	51.614	0.72963	1.35341	0.923851	0.868152	1.2865	0.868133				1.47318	0.0115264	1.65223	0.0457868	0.891628	0.375809
F1RS21	Uncharacterized protein	COG6	Conserved oligomeric Golgi complex subunit 6 OS=Homo sapiens GN=COG6 PE=1 SV=2	Conserved oligomeric Golgi complex subunit 6 OS=Mus musculus GN=Cog6 PE=2 SV=2	60.565	1.12473	0.788593	1.07938	1.01141	0.809883	1.1572	1.05859	0.830675	1.11507	0.724761	0.00109562	0.76036	0.00918843	0.953182	0.267748
F1RS36	78 kDa glucose-regulated protein	HSPA5			70.251	0.795721	1.30764	0.897943	0.788597	1.27468	0.938338	0.827836	1.23138	0.914146	1.38659	0.000701335	1.58104	0.000280615	0.877011	0.0025922
F1RS38	Uncharacterized protein	---	Dolichyl-phosphate beta-glucosyltransferase OS=Homo sapiens GN=ALG5 PE=1 SV=1	Dolichyl-phosphate beta-glucosyltransferase OS=Mus musculus GN=Alg5 PE=2 SV=1	21.343
F1RS39	Uncharacterized protein	---	Transcription factor SPT20 homolog OS=Homo sapiens GN=SUPT20H PE=1 SV=2	Transcription factor SPT20 homolog OS=Mus musculus GN=Supt20h PE=1 SV=1	33.689	1.03865	0.976451	0.98621							0.990104		0.940118		1.05317
F1RS44	Uncharacterized protein	NGLY1	Peptide-N(4)-(N-acetyl-beta-glucosaminyl)asparagine amidase OS=Homo sapiens GN=NGLY1 PE=1 SV=1	Peptide-N(4)-(N-acetyl-beta-glucosaminyl)asparagine amidase OS=Mus musculus GN=Ngly1 PE=1 SV=2	74.776	1.12029	0.645578	1.18377	1.16922	0.636028	1.16595	1.18269	0.705537	1.14324	0.5689	0.000224265	0.572299	7.71536e-05	0.99406	0.774779
F1RS45	DNA topoisomerase 2	TOP2B			182.11	1.13821	0.734646	1.10908	1.15197	0.776245	1.04695	1.12436	0.725373	1.14665	0.677104	0.00154698	0.654923	0.000207711	1.03387	0.327477
F1RS48	Anaphase-promoting complex subunit 10	ANAPC10			21.252
F1RS49	Uncharacterized protein	ABCE1	ATP-binding cassette sub-family E member 1 OS=Homo sapiens GN=ABCE1 PE=1 SV=1	ATP-binding cassette sub-family E member 1 OS=Mus musculus GN=Abce1 PE=2 SV=1	67.361	1.11695	0.835351	1.03702	1.05203	0.900659	1.01994	1.05122	0.854914	1.07357	0.827632	0.00228866	0.804583	0.00207738	1.02865	0.33442
F1RS50	Uncharacterized protein	OTUD4	OTU domain-containing protein 4 OS=Homo sapiens GN=OTUD4 PE=1 SV=4	OTU domain-containing protein 4 OS=Mus musculus GN=Otud4 PE=1 SV=1	121.51				0.96728	0.951227	1.07298				0.886527		0.983405		0.901488
F1RS52	Uncharacterized protein	MMAA	Methylmalonic aciduria type A protein, mitochondrial OS=Homo sapiens GN=MMAA PE=1 SV=1	Methylmalonic aciduria type A homolog, mitochondrial OS=Mus musculus GN=Mmaa PE=2 SV=1	46.958	1.06144	0.869612	1.08954	1.03317	0.976101	0.993009	1.04665	0.850337	1.1064	0.845435	0.0361018	0.858268	0.0574859	0.985048	0.700234
F1RS54	Uncharacterized protein	ZNF827	Zinc finger protein 827 OS=Homo sapiens GN=ZNF827 PE=2 SV=1	MCG121902 OS=Mus musculus GN=Zfp827 PE=4 SV=1	105.61	1.01866	0.988226	0.993712							0.994479		0.970125		1.0251
F1RS65	Uncharacterized protein	TBC1D5	TBC1 domain family member 5 OS=Homo sapiens GN=TBC1D5 PE=1 SV=1	TBC1 domain family member 5 OS=Mus musculus GN=Tbc1d5 PE=1 SV=2	88.075	1.14294	0.712773	1.12339	1.10434	0.857833	1.02979	1.11372	0.705801	1.10788	0.698058	0.00869917	0.677301	0.0144556	1.03065	0.373905
F1RS71	Uncharacterized protein	PRMT9	Putative protein arginine N-methyltransferase 9 OS=Homo sapiens GN=PRMT9 PE=2 SV=1	Putative protein arginine N-methyltransferase 10 OS=Mus musculus GN=Prmt10 PE=2 SV=1	75.341
F1RS72	Uncharacterized protein	ARHGAP10	Rho GTPase-activating protein 10 OS=Homo sapiens GN=ARHGAP10 PE=1 SV=1	Rho GTPase-activating protein 10 OS=Mus musculus GN=Arhgap10 PE=1 SV=2	54.863	1.09724	0.892089	1.00983	1.02996	1.01774	0.956912	1.02204	0.84285	1.13149	0.888468	0.191494	0.874077	0.11034	1.01646	0.785831
F1RS78	Uncharacterized protein	OXNAD1	Oxidoreductase NAD-binding domain-containing protein 1 OS=Homo sapiens GN=OXNAD1 PE=1 SV=1	Oxidoreductase NAD-binding domain-containing protein 1 OS=Mus musculus GN=Oxnad1 PE=2 SV=2	36.956	0.869974	1.135	0.995364	0.843507	1.35026	0.834479	0.899207	1.1794	0.913404	1.33589	0.0227495	1.40264	0.0275659	0.952407	0.453523
F1RS81	Uncharacterized protein	ANKRD28	Serine/threonine-protein phosphatase 6 regulatory ankyrin repeat subunit A OS=Homo sapiens GN=ANKRD28 PE=1 SV=5	Serine/threonine-protein phosphatase 6 regulatory ankyrin repeat subunit A OS=Mus musculus GN=Ankrd28 PE=1 SV=1	116.57	0.977287	1.09111	0.937403	1.14604	0.687029	1.14221	1.01341	0.836822	1.15018	0.809637	0.224815	0.833657	0.277367	0.971187	0.739496
F1RS83	Uncharacterized protein	---	2-hydroxyacyl-CoA lyase 1 OS=Homo sapiens GN=HACL1 PE=1 SV=2	2-hydroxyacyl-CoA lyase 1 OS=Mus musculus GN=Hacl1 PE=2 SV=2	30.617	0.958	1.07687	0.968068	0.867519	1.14273	0.995495	0.935368	1.06903	0.990262	1.11335	0.0297698	1.19115	0.00847122	0.934682	0.13182
F1RS88	Uncharacterized protein	DCLK2	Serine/threonine-protein kinase DCLK2 OS=Homo sapiens GN=DCLK2 PE=2 SV=4	Serine/threonine-protein kinase DCLK2 OS=Mus musculus GN=Dclk2 PE=1 SV=1	37.656	1.23531	0.525629	1.21889	1.17379	0.688258	1.11571	1.14836	0.781083	1.08253	0.583815	0.0104176	0.560787	0.0126093	1.04106	0.398823
F1RS89	Uncharacterized protein	---	Lipopolysaccharide-responsive and beige-like anchor protein OS=Homo sapiens GN=LRBA PE=1 SV=4	Lipopolysaccharide-responsive and beige-like anchor protein OS=Mus musculus GN=Lrba PE=2 SV=1	102.8	1.29854	0.651417	1.04598	1.17551	0.661818	1.12143	1.10747	0.770054	1.13082	0.631639	0.00151227	0.581678	0.00290679	1.08589	0.229075
F1RS91	Uncharacterized protein	SH3D19	SH3 domain-containing protein 19 OS=Homo sapiens GN=SH3D19 PE=1 SV=2	SH3 domain-containing protein 19 OS=Mus musculus GN=Sh3d19 PE=1 SV=2	85.479	1.18597	0.564575	1.22836							0.459617		0.476043		0.965495
F1RSA2	Calcium-transporting ATPase	ATP2C1			100.57	1.02344	0.907144	1.05485	1.04408	0.928653	1.03126	1.01897	0.900498	1.06615	0.868042	0.000577167	0.886538	0.000552454	0.979137	0.169001
F1RSB0	Uncharacterized protein	ARFIP1	Arfaptin-1 OS=Homo sapiens GN=ARFIP1 PE=1 SV=2	MCG18094 (Fragment) OS=Mus musculus GN=Arfip1 PE=4 SV=1	38.391	1.1056	0.791988	1.15184	1.15711	0.629617	1.17161	1.0893	0.717137	1.18795	0.609083	0.00793368	0.638047	0.00586148	0.954606	0.104183
F1RSB1	Meiotic nuclear division protein 1 homolog	MND1			23.888	0.922806	1.238	0.852815	0.965316	1.2094	0.847114	0.83294	1.19994	0.953426	1.37461	0.00613937	1.34041	0.0106547	1.02552	0.687547
F1RSB6	Uncharacterized protein	MRPS23	28S ribosomal protein S23, mitochondrial OS=Homo sapiens GN=MRPS23 PE=1 SV=2	28S ribosomal protein S23, mitochondrial OS=Mus musculus GN=Mrps23 PE=2 SV=1	21.505							0.964714	1.20447	0.828676	1.45349		1.24853		1.16416
F1RSC3	Carboxypeptidase	SCPEP1			51.147	1.36724	0.7159	0.924156	1.12661	0.537933	1.29857	1.26406	0.882046	0.926162	0.678295	0.104709	0.568368	0.0143264	1.19341	0.245987
F1RSC5	Diacylglycerol kinase	DGKE			48.377
F1RSD1	Uncharacterized protein	KIFAP3	Kinesin-associated protein 3 OS=Homo sapiens GN=KIFAP3 PE=1 SV=2	Kinesin-associated protein 3 OS=Mus musculus GN=Kifap3 PE=1 SV=1	58.496	1.08408	0.942214	0.975992	1.22846	0.714206	1.04275	1.1839	0.763701	1.0674	0.784189	0.0697142	0.692167	0.0173602	1.13295	0.0644307
F1RSD6	Uncharacterized protein	COIL	Coilin OS=Homo sapiens GN=COIL PE=1 SV=1	Coilin OS=Mus musculus GN=Coil PE=2 SV=1	62.281	0.96851	1.04042	0.933947	0.999501	1.12458	0.890596	0.946934	1.11411	0.934837	1.18835	0.0095373	1.12493	0.0253722	1.05638	0.0701404
F1RSE5	Uncharacterized protein	CEBPD	CCAAT/enhancer-binding protein delta OS=Homo sapiens GN=CEBPD PE=1 SV=2	CCAAT/enhancer-binding protein delta OS=Mus musculus GN=Cebpd PE=1 SV=2	27.174	1.17918	0.589444	1.21182							0.486414		0.499876		0.973068
F1RSE6	Uncharacterized protein	PRKDC	DNA-dependent protein kinase catalytic subunit OS=Homo sapiens GN=PRKDC PE=1 SV=3	DNA-dependent protein kinase catalytic subunit OS=Mus musculus GN=Prkdc PE=1 SV=3	464.42	1.13158	0.775168	1.06903	1.123	0.88927	1.00573	1.07341	0.907189	1.03456	0.82707	0.0334985	0.772726	0.0143501	1.07033	0.0473599
F1RSE7	Uncharacterized protein	MCM4	DNA replication licensing factor MCM4 OS=Homo sapiens GN=MCM4 PE=1 SV=5	DNA replication licensing factor MCM4 OS=Mus musculus GN=Mcm4 PE=2 SV=1	94.138	1.26157	0.657556	1.07971	1.2225	0.681128	1.05514	1.13176	0.832755	1.04594	0.682675	0.0225883	0.600538	0.00300011	1.13677	0.0555489
F1RSF3	Uncharacterized protein	PCMTD1	Protein-L-isoaspartate O-methyltransferase domain-containing protein 1 OS=Homo sapiens GN=PCMTD1 PE=2 SV=2	Protein-L-isoaspartate O-methyltransferase domain-containing protein 1 OS=Mus musculus GN=Pcmtd1 PE=2 SV=1	40.548	1.07455	0.812514	1.10338	1.14337	0.787524	1.05604	0.942798	0.965474	1.08656	0.790367	0.0480308	0.811687	0.0706231	0.973733	0.68043
F1RSG8	Uncharacterized protein	TCEA1	Transcription elongation factor A protein 1 OS=Homo sapiens GN=TCEA1 PE=1 SV=2	Transcription elongation factor A protein 1 OS=Mus musculus GN=Tcea1 PE=1 SV=2	33.748	0.981792	1.04842	0.944359	1.02234	0.990147	0.988305	0.920904	1.08537	0.961776	1.07929	0.0927924	1.068	0.176893	1.01057	0.773677
F1RSG9	Uncharacterized protein	LYPLA1	Acyl-protein thioesterase 1 OS=Homo sapiens GN=LYPLA1 PE=1 SV=1	Acyl-protein thioesterase 1 OS=Mus musculus GN=Lypla1 PE=1 SV=1	23.531	1.13534	0.768131	1.1348	1.08177	0.849565	1.03172	0.997515	0.968048	1.0267	0.80976	0.0518988	0.804367	0.0476582	1.0067	0.900224
F1RSH4	Uncharacterized protein	UTP18	U3 small nucleolar RNA-associated protein 18 homolog OS=Homo sapiens GN=UTP18 PE=1 SV=3	U3 small nucleolar RNA-associated protein 18 homolog OS=Mus musculus GN=Utp18 PE=1 SV=1	61.845	1.05086	0.938118	1.01012				1.01609	0.95309	1.03201	0.926097	0.0387636	0.914976	0.0856001	1.01215	0.616994
F1RSJ1	Uncharacterized protein	AGO2	Protein argonaute-2 OS=Homo sapiens GN=AGO2 PE=1 SV=3	Protein argonaute-2 OS=Mus musculus GN=Ago2 PE=1 SV=3	75.337	1.05141	0.880131	0.98519	1.0301	0.911502	1.03705	1.06145	0.922351	1.03448	0.887875	0.00697282	0.863512	0.0012008	1.02821	0.229132
F1RSJ7	Uncharacterized protein	DDX42	ATP-dependent RNA helicase DDX42 OS=Homo sapiens GN=DDX42 PE=1 SV=1	ATP-dependent RNA helicase DDX42 OS=Mus musculus GN=Ddx42 PE=1 SV=3	102.76	1.04212	1.01474	0.915911	1.04648	0.996217	0.890638	1.03796	1.1032	0.888951	1.15532	0.0439125	0.996032	0.911894	1.15992	0.00205264
F1RSJ8	pre-rRNA processing protein FTSJ3	FTSJ3			94.762	1.09021	0.938992	0.97334	1.10174	0.991112	0.914638				1.02231	0.645889	0.880541	0.111695	1.16101	0.110744
F1RSJ9	Uncharacterized protein	SMARCD2	SWI/SNF-related matrix-associated actin-dependent regulator of chromatin subfamily D member 2 OS=Homo sapiens GN=SMARCD2 PE=1 SV=3	SWI/SNF-related matrix-associated actin-dependent regulator of chromatin subfamily D member 2 OS=Mus musculus GN=Smarcd2 PE=2 SV=2	58.812	1.01273	0.939715	1.04352	1.19727	0.840393	0.976995	1.17444	0.848923	0.962327	0.881384	0.0463215	0.776799	0.0301694	1.13464	0.133951
F1RSL0	Uncharacterized protein	EXOSC4	Exosome complex component RRP41 OS=Homo sapiens GN=EXOSC4 PE=1 SV=3	Exosome complex component RRP41 OS=Mus musculus GN=Exosc4 PE=2 SV=3	26.438	1.06071	0.925139	0.930124	0.980656	0.944504	1.00717	1.00997	1.10033	0.891039	1.05008	0.51605	0.973334	0.686033	1.07885	0.155955
F1RSL3	Uncharacterized protein	---	Sphingomyelin phosphodiesterase 3 OS=Homo sapiens GN=SMPD3 PE=1 SV=1	MCG22096 OS=Mus musculus GN=Smpd5 PE=2 SV=1	53.424	1.02058	0.868685	1.10133							0.788758		0.851167		0.926678
F1RSM0	Uncharacterized protein	NOL11	Nucleolar protein 11 OS=Homo sapiens GN=NOL11 PE=1 SV=1	Nucleolar protein 11 OS=Mus musculus GN=Nol11 PE=2 SV=1	79.822	1.01302	1.0488	0.943451	1.01469	1.00463	0.982459				1.06621	0.164824	1.01269	0.664169	1.05285	0.23243
F1RSM2	Uncharacterized protein	PSMD12	26S proteasome non-ATPase regulatory subunit 12 OS=Homo sapiens GN=PSMD12 PE=1 SV=3	26S proteasome non-ATPase regulatory subunit 12 OS=Mus musculus GN=Psmd12 PE=1 SV=4	53.024	1.17076	0.663958	1.14413	1.14726	0.606632	1.18919	1.15629	0.697858	1.12536	0.569132	0.000209738	0.566572	0.00166605	1.00452	0.815557
F1RSM4	Ribosome biogenesis protein BOP1	BOP1			69.945	1.06434	0.919758	1.01459	1.03783	0.974932	0.987451	1.05848	0.891962	1.05418	0.911797	0.0475236	0.88167	0.0266868	1.03417	0.206731
F1RSM7	Uncharacterized protein	HSF1	Heat shock factor protein 1 OS=Homo sapiens GN=HSF1 PE=1 SV=1	Heat shock factor protein 1 OS=Mus musculus GN=Hsf1 PE=1 SV=2	55.714	1.08453	0.832575	1.0759	1.15228	0.792983	1.04306	1.10469	0.858086	1.04573	0.784799	0.00154104	0.74327	0.00049905	1.05587	0.0798368
F1RSN0	Uncharacterized protein	SHARPIN	Sharpin OS=Homo sapiens GN=SHARPIN PE=1 SV=1	Sharpin OS=Mus musculus GN=Sharpin PE=1 SV=1	42.956	1.14335	0.842546	1.01299	1.03292	1.02304	0.949528	1.06355	0.943326	1.02095	0.941489	0.388583	0.866993	0.0927526	1.08592	0.107916
F1RSN2	Uncharacterized protein	GPAA1	Glycosylphosphatidylinositol anchor attachment 1 protein OS=Homo sapiens GN=GPAA1 PE=1 SV=3	Glycosylphosphatidylinositol anchor attachment 1 protein OS=Mus musculus GN=Gpaa1 PE=1 SV=3	67.925	0.905206	1.11241	0.99694	0.892733	1.16013	0.967568	0.981036	1.00959	0.998395	1.10774	0.132748	1.18106	0.0421218	0.937923	0.145097
F1RSN3	Uncharacterized protein	---	5-oxoprolinase OS=Homo sapiens GN=OPLAH PE=1 SV=3	5-oxoprolinase OS=Mus musculus GN=Oplah PE=2 SV=1	83.761	1.24243	0.683847	1.06761	1.13267	0.888085	0.977161	1.0764	0.891783	1.038	0.799189	0.0803381	0.713808	0.0211846	1.11961	0.111043
F1RSN6	Solute carrier family 52, riboflavin transporter, member 2	SLC52A2			45.738							1.001	1.15267	0.847134	1.36067		1.15152		1.18163
F1RSN8	Uncharacterized protein	CPSF1	Cleavage and polyadenylation specificity factor subunit 1 OS=Homo sapiens GN=CPSF1 PE=1 SV=2	Cleavage and polyadenylation specificity factor subunit 1 OS=Mus musculus GN=Cpsf1 PE=1 SV=1	124.49	1.05425	0.912675	1.03405	0.984866	1.03218	0.955323	0.974906	0.968957	1.0272	0.965935	0.471535	0.96675	0.48073	0.999157	0.982061
F1RSP2	Uncharacterized protein	CYHR1	Cysteine and histidine-rich protein 1 OS=Homo sapiens GN=CYHR1 PE=2 SV=2	Cysteine and histidine-rich protein 1 OS=Mus musculus GN=Cyhr1 PE=1 SV=1	40.86	1.1448	0.880088	0.977323	1.10447	0.709307	1.16064				0.743415	0.160622	0.706627	0.145659	1.05206	0.652048
F1RSP4	Uncharacterized protein	PPP1R16A	Protein phosphatase 1 regulatory subunit 16A OS=Homo sapiens GN=PPP1R16A PE=1 SV=1	Protein phosphatase 1 regulatory subunit 16A OS=Mus musculus GN=Ppp1r16a PE=1 SV=1	57.846	1.0517	0.790308	1.14459							0.690471		0.751458		0.918842
F1RSP8	Uncharacterized protein	LRRC14	Leucine-rich repeat-containing protein 14 OS=Homo sapiens GN=LRRC14 PE=2 SV=1	Leucine-rich repeat-containing protein 14 OS=Mus musculus GN=Lrrc14 PE=2 SV=1	54.845	1.19475	0.662835	1.13043	1.08304	0.756206	1.13892	1.14636	0.833483	1.0322	0.682263	0.00615041	0.657835	0.0044745	1.03713	0.434735
F1RSQ0	Uncharacterized protein	C8orf82	UPF0598 protein C8orf82 OS=Homo sapiens GN=C8orf82 PE=1 SV=2	UPF0598 protein C8orf82 homolog OS=Mus musculus PE=2 SV=1	24.267				1.06826	0.863402	1.05793				0.816124		0.808232		1.00976
F1RSQ6	Uncharacterized protein	---	Exosome complex component RRP43 OS=Homo sapiens GN=EXOSC8 PE=1 SV=1	Exosome complex component RRP43 OS=Mus musculus GN=Exosc8 PE=2 SV=1	12.168	1.13641	0.930295	0.939048	1.02348	0.968349	1.0064	0.992953	0.930882	1.07522	0.93672	0.241813	0.89745	0.122957	1.04376	0.495272
F1RSR1	Uncharacterized protein	LOC100152415	Spartin OS=Homo sapiens GN=SPG20 PE=1 SV=1	Spartin OS=Mus musculus GN=Spg20 PE=1 SV=1	66.679	1.01255	0.981202	1.00573	1.00089	0.909141	1.07931	1.00265	1.02069	0.976991	0.950687	0.323053	0.965167	0.395825	0.984997	0.665999
F1RSR4	Uncharacterized protein	RFC3	Replication factor C subunit 3 OS=Homo sapiens GN=RFC3 PE=1 SV=2	Replication factor C subunit 3 OS=Mus musculus GN=Rfc3 PE=2 SV=1	40.474	1.10673	0.850437	1.02475	1.02182	1.03679	0.947573	1.03758	0.966775	1.02197	0.953147	0.495328	0.901417	0.186775	1.05739	0.189934
F1RSR8	Uncharacterized protein	LOC100154396	Sister chromatid cohesion protein PDS5 homolog B OS=Homo sapiens GN=PDS5B PE=1 SV=1	Sister chromatid cohesion protein PDS5 homolog B OS=Mus musculus GN=Pds5b PE=2 SV=1	57.262	0.98179	0.939641	0.992162	1.1292	0.961811	0.86031	1.05826	0.900074	1.07	0.958614	0.583582	0.88397	0.0860646	1.08444	0.338627
F1RSS9	Uncharacterized protein	B3GLCT	Beta-1,3-glucosyltransferase OS=Homo sapiens GN=B3GALTL PE=1 SV=2	Beta-1,3-glucosyltransferase OS=Mus musculus GN=B3galtl PE=2 SV=3	52.454	1.07137	0.730513	1.18764	1.0196	0.769656	1.18297	1.0599	0.762547	1.18658	0.636097	0.000671402	0.718123	0.000176248	0.885776	0.0126352
F1RST0	Uncharacterized protein	HSPH1	Heat shock protein 105 kDa OS=Homo sapiens GN=HSPH1 PE=1 SV=1	Heat shock protein 105 kDa OS=Mus musculus GN=Hsph1 PE=1 SV=2	96.697	1.05773	0.907483	1.03964	1.05429	0.884364	1.04999	0.939817	1.03728	0.962372	0.926976	0.264334	0.927026	0.295529	0.999946	0.999147
F1RSW6	Uncharacterized protein	POLR1D	DNA-directed RNA polymerases I and III subunit RPAC2 OS=Homo sapiens GN=POLR1D PE=1 SV=1	DNA-directed RNA polymerases I and III subunit RPAC2 OS=Mus musculus GN=Polr1d PE=2 SV=1	14.756	1.06403	0.789734	1.13384	1.03562	0.856712	1.06425	1.10991	0.883272	1.0159	0.787097	0.0074274	0.788182	0.00367749	0.998624	0.973013
F1RSY4	Uncharacterized protein	SMPD2	Sphingomyelin phosphodiesterase 2 OS=Homo sapiens GN=SMPD2 PE=1 SV=2	Sphingomyelin phosphodiesterase 2 OS=Mus musculus GN=Smpd2 PE=1 SV=1	47.572	0.956476	1.15364	0.903038	0.89763	1.33415	0.821866	0.950868	1.00723	1.0788	1.24657	0.133385	1.24601	0.13054	1.00045	0.996114
F1RSY7	Uncharacterized protein	---	Polyphosphoinositide phosphatase OS=Homo sapiens GN=FIG4 PE=1 SV=1	Polyphosphoinositide phosphatase OS=Mus musculus GN=Fig4 PE=1 SV=1	46.813	1.11533	0.585265	1.27402							0.459383		0.524747		0.875436
F1RSY9	Uncharacterized protein	CDC40	Pre-mRNA-processing factor 17 OS=Homo sapiens GN=CDC40 PE=1 SV=1	Pre-mRNA-processing factor 17 OS=Mus musculus GN=Cdc40 PE=2 SV=1	65.43	0.867204	1.2877	0.858184	0.894617	1.31973	0.814588	1.00904	1.07322	0.918872	1.4202	0.0296781	1.32834	0.0389811	1.06915	0.329105
F1RSZ5	Caspase-3	CASP3			26.932	1.30589	0.440011	1.23269	1.23361	0.55398	1.17136	1.10372	0.797053	1.10736	0.510063	0.0225852	0.49161	0.0128629	1.03754	0.567365
F1RSZ8	Uncharacterized protein	---	Ectonucleotide pyrophosphatase/phosphodiesterase family member 6 OS=Homo sapiens GN=ENPP6 PE=1 SV=2	Ectonucleotide pyrophosphatase/phosphodiesterase family member 6 OS=Mus musculus GN=Enpp6 PE=2 SV=1	48.946	1.08281	0.669413	1.25226							0.534566		0.61822		0.864685
F1RT06	Uncharacterized protein	RPF2	Ribosome production factor 2 homolog OS=Homo sapiens GN=RPF2 PE=1 SV=2	Ribosome production factor 2 homolog OS=Mus musculus GN=Rpf2 PE=2 SV=2	30.377				1.12658	0.999381	0.884592				1.12976		0.887089		1.27356
F1RT07	Uncharacterized protein	GTF3C6	General transcription factor 3C polypeptide 6 OS=Homo sapiens GN=GTF3C6 PE=1 SV=1	General transcription factor 3C polypeptide 6 OS=Mus musculus GN=Gtf3c6 PE=2 SV=1	24.749
F1RT10	Uncharacterized protein	CDKN2AIP	CDKN2A-interacting protein OS=Homo sapiens GN=CDKN2AIP PE=1 SV=3	CDKN2A-interacting protein OS=Mus musculus GN=Cdkn2aip PE=2 SV=1	61.664	1.06174	0.898713	1.05835	1.23092	0.681689	1.05854	1.12085	0.831849	1.07644	0.755401	0.0545563	0.706677	0.0166266	1.06895	0.27603
F1RT12	Uncharacterized protein	TRAPPC11	Trafficking protein particle complex subunit 11 OS=Homo sapiens GN=TRAPPC11 PE=1 SV=2	Trafficking protein particle complex subunit 11 OS=Mus musculus GN=Trappc11 PE=2 SV=1	128.76	1.14763	0.662482	1.17383	1.09975	0.670989	1.19876	1.07341	0.74671	1.22484	0.578241	0.000390463	0.626411	0.000349824	0.923102	0.0303162
F1RT13	Uncharacterized protein	RWDD4	RWD domain-containing protein 4 OS=Homo sapiens GN=RWDD4 PE=1 SV=3	RWD domain-containing protein 4 OS=Mus musculus GN=Rwdd4 PE=2 SV=1	21.597							0.746963	1.49789	0.735305	2.03711		2.00531		1.01586
F1RT25	Uncharacterized protein	SNX3	Sorting nexin-3 OS=Homo sapiens GN=SNX3 PE=1 SV=3	Sorting nexin-3 OS=Mus musculus GN=Snx3 PE=2 SV=1	13.565	1.17359	0.670001	1.16221	1.15404	0.643049	1.0983	1.18272	0.701836	1.12209	0.595662	5.86593e-05	0.573985	0.000141446	1.03777	0.135875
F1RT27	Osteopetrosis associated transmembrane protein 1	OSTM1			37.535	1.06788	0.739208	1.17655	0.955621	0.971905	1.06543				0.763215	0.223688	0.84562	0.388346	0.90255	0.300802
F1RT28	Uncharacterized protein	SEC63	Translocation protein SEC63 homolog OS=Homo sapiens GN=SEC63 PE=1 SV=2	Translocation protein SEC63 homolog OS=Mus musculus GN=Sec63 PE=2 SV=4	87.897	0.89468	1.15922	0.951493	0.85998	1.14893	0.976271	0.964648	1.03524	0.970157	1.15372	0.060155	1.2295	0.0162793	0.938365	0.187421
F1RT47	Uncharacterized protein	RTN4IP1	Reticulon-4-interacting protein 1, mitochondrial OS=Homo sapiens GN=RTN4IP1 PE=1 SV=2	Reticulon-4-interacting protein 1, mitochondrial OS=Mus musculus GN=Rtn4ip1 PE=1 SV=2	43.879	0.85148	1.26254	0.895583							1.40974		1.48275		0.950756
F1RT57	Uncharacterized protein	PPP1R9B	Neurabin-2 OS=Homo sapiens GN=PPP1R9B PE=1 SV=2	Neurabin-2 OS=Mus musculus GN=Ppp1r9b PE=1 SV=1	89.39	0.940488	1.19828	0.872988	0.871098	1.20046	0.875402	0.930392	1.15778	0.914348	1.33567	0.000103437	1.29707	0.00101311	1.02976	0.368741
F1RT67	Inositol monophosphatase 3	IMPAD1			38.668	0.990668	1.02893	0.927629	0.993961	1.00845	0.992916	1.01294	0.964572	1.01451	1.02279	0.531142	1.00147	0.947605	1.0213	0.512539
F1RT69	Uncharacterized protein	FAM110B	Protein FAM110B OS=Homo sapiens GN=FAM110B PE=1 SV=1	Protein FAM110B OS=Mus musculus GN=Fam110b PE=2 SV=1	39.813	1.24579	0.436353	1.29099	1.18428	0.522307	1.25244	1.23543	0.35823	1.42397	0.331929	0.000242598	0.359266	0.00120908	0.923907	0.183491
F1RT80	Uncharacterized protein	EME1	Crossover junction endonuclease EME1 OS=Homo sapiens GN=EME1 PE=1 SV=2	Crossover junction endonuclease EME1 OS=Mus musculus GN=Eme1 PE=1 SV=1	64.096	1.08361	1.02569	0.900045							1.1396		0.946551		1.20395
F1RT83	Uncharacterized protein	SDCBP	Syntenin-1 OS=Homo sapiens GN=SDCBP PE=1 SV=1	MCG4375, isoform CRA_b OS=Mus musculus GN=Sdcbp PE=2 SV=1	32.25	1.38724	0.599518	1.01236	1.22894	0.651586	1.09753	1.38426	0.660455	0.987356	0.617181	0.00152019	0.477837	0.00246938	1.29161	0.012441
F1RT84	Uncharacterized protein	NSMAF	Protein FAN OS=Homo sapiens GN=NSMAF PE=1 SV=2	Protein FAN OS=Mus musculus GN=Nsmaf PE=2 SV=2	103.73
F1RT87	Uncharacterized protein	---	Ras-related protein Rab-2A OS=Homo sapiens GN=RAB2A PE=1 SV=1	Ras-related protein Rab-2A OS=Mus musculus GN=Rab2a PE=1 SV=1	10.103	0.974772	1.05136	0.975226	0.961956	1.06459	0.940118	1.00139	0.980656	1.01798	1.05566	0.190612	1.05394	0.168889	1.00163	0.953697
F1RT90	Uncharacterized protein	---	Aspartyl/asparaginyl beta-hydroxylase OS=Homo sapiens GN=ASPH PE=1 SV=3	Aspartyl/asparaginyl beta-hydroxylase OS=Mus musculus GN=Asph PE=2 SV=1	62.856	0.891975	1.05887	1.02058	0.912569	1.09795	0.965539	0.933553	0.9645	1.07713	1.01896	0.724641	1.13996	0.0735356	0.893852	0.0638979
F1RT96	Uncharacterized protein	ACSF2	Acyl-CoA synthetase family member 2, mitochondrial OS=Homo sapiens GN=ACSF2 PE=1 SV=2	Acyl-CoA synthetase family member 2, mitochondrial OS=Mus musculus GN=Acsf2 PE=1 SV=1	67.477	0.873964	1.21012	0.889362	0.84219	1.35128	0.820231	0.891123	1.14382	0.947607	1.39441	0.0132135	1.42111	0.0220739	0.981213	0.706038
F1RTA1	Uncharacterized protein	ABCC3	Canalicular multispecific organic anion transporter 2 OS=Homo sapiens GN=ABCC3 PE=1 SV=3	Canalicular multispecific organic anion transporter 2 OS=Mus musculus GN=Abcc3 PE=2 SV=1	170.76
F1RTA3	Uncharacterized protein	GGH	Gamma-glutamyl hydrolase OS=Homo sapiens GN=GGH PE=1 SV=2	Gamma-glutamyl hydrolase OS=Mus musculus GN=Ggh PE=1 SV=2	35.428	0.889036	1.07863	0.979511	0.908679	0.967856	1.0841	0.996549	0.964659	1.03832	0.97073	0.56531	1.07762	0.222539	0.900813	0.0845355
F1RTB0	Armadillo repeat-containing protein 1	ARMC1			31.194	0.926871	0.996125	1.07041	1.10085	0.859339	1.03166	1.04198	0.914427	1.05991	0.875998	0.0713202	0.902334	0.20169	0.970814	0.611604
F1RTB6	Uncharacterized protein	LUC7L3	Luc7-like protein 3 OS=Homo sapiens GN=LUC7L3 PE=1 SV=2	Luc7-like protein 3 OS=Mus musculus GN=Luc7l3 PE=1 SV=1	51.468	0.762362	1.48312	0.763535	0.84322	1.47188	0.747028	0.859995	1.2715	0.830422	1.80544	0.00612575	1.7142	0.00595786	1.05322	0.353659
F1RTB9	Histone acetyltransferase	KAT7			70.656	0.682535	1.57544	0.801606	1.00023	1.05172	0.907968	0.969255	1.09645	0.982019	1.38342	0.168152	1.40406	0.157499	0.985299	0.915113
F1RTC2	Uncharacterized protein	MMGT1	Membrane magnesium transporter 1 OS=Homo sapiens GN=MMGT1 PE=1 SV=1	Membrane magnesium transporter 1 OS=Mus musculus GN=Mmgt1 PE=2 SV=1	14.7	0.863752	1.20507	0.936939				0.879317	1.14437	0.966421	1.23436	0.0471041	1.34788	0.0501842	0.915785	0.0677957
F1RTC7	Uncharacterized protein	LOC100521485	Protein FAM127A OS=Homo sapiens GN=FAM127A PE=1 SV=1	CAAX box 1 homolog A (Human) OS=Mus musculus GN=Cxx1b PE=4 SV=1	13.217	1.05409	0.900057	1.04199							0.863789		0.85387		1.01162
F1RTE1	Uncharacterized protein (Fragment)	GPC4	Glypican-4 OS=Homo sapiens GN=GPC4 PE=1 SV=4	Glypican-4 OS=Mus musculus GN=Gpc4 PE=2 SV=2	56.697	0.805533	1.41996	0.793557	0.777245	1.46748	0.804498	0.837662	1.31194	0.86327	1.70615	0.00185158	1.73497	0.00252003	0.983389	0.650796
F1RTF0	Uncharacterized protein	PRRC2A	Protein PRRC2A OS=Homo sapiens GN=PRRC2A PE=1 SV=3	Protein PRRC2A OS=Mus musculus GN=Prrc2a PE=1 SV=1	229.07	0.427954	2.15409	0.489377	0.505213	1.98737	0.569161	0.741011	1.59982	0.639283	3.38156	0.0105117	3.42931	0.0045694	0.986075	0.944474
F1RTH6	Uncharacterized protein	UTP14A	U3 small nucleolar RNA-associated protein 14 homolog A OS=Homo sapiens GN=UTP14A PE=1 SV=1	U3 small nucleolar RNA-associated protein 14 homolog A OS=Mus musculus GN=Utp14a PE=2 SV=1	87.617	0.900624	1.14086	0.961977	0.922624	1.13157	0.932622	0.86798	1.13602	0.877884	1.22939	0.0124734	1.26651	0.00357048	0.970692	0.415991
F1RTJ7	Uncharacterized protein	GTF3A	Transcription factor IIIA OS=Homo sapiens GN=GTF3A PE=1 SV=3	Transcription factor IIIA OS=Mus musculus GN=Gtf3a PE=2 SV=1	42.612	1.19203	0.630388	1.16261							0.542219		0.528836		1.02531
F1RTJ9	60S ribosomal protein L21	RPL21			18.565	1.07034	0.998303	0.953869	1.07923	1.19102	0.766617	1.13543	0.904346	0.960279	1.15402	0.267377	0.941756	0.531944	1.2254	0.0750826
F1RTM1	Uncharacterized protein	---	Mitochondrial intermediate peptidase OS=Homo sapiens GN=MIPEP PE=1 SV=2	Mitochondrial intermediate peptidase OS=Mus musculus GN=Mipep PE=2 SV=1	27.72
F1RTN1	Uncharacterized protein	LAS1L	Ribosomal biogenesis protein LAS1L OS=Homo sapiens GN=LAS1L PE=1 SV=2	Ribosomal biogenesis protein LAS1L OS=Mus musculus GN=Las1l PE=1 SV=1	88.074	1.13368	0.779824	1.07288	1.07196	0.884469	1.03596	1.0543	0.871193	1.07353	0.796729	0.0136276	0.777769	0.00533839	1.02438	0.410148
F1RTQ8	Uncharacterized protein	CARMIL1	Leucine-rich repeat-containing protein 16A OS=Homo sapiens GN=LRRC16A PE=1 SV=1	Leucine-rich repeat-containing protein 16A OS=Mus musculus GN=Lrrc16a PE=1 SV=2	146.72	1.27019	0.648872	1.07422	1.26261	0.594372	1.10473	1.20605	0.640187	1.15511	0.564906	0.000147252	0.503746	2.53129e-05	1.12141	0.0128598
F1RTT0	Uncharacterized protein	SMAP1	Stromal membrane-associated protein 1 OS=Homo sapiens GN=SMAP1 PE=1 SV=2	Protein unc-45 homolog A OS=Mus musculus GN=Smap1 PE=4 SV=1	50.353	1.06131	0.987109	0.955734				0.907106	1.15276	0.932714	1.13313	0.367134	1.0871	0.528155	1.04235	0.695346
F1RTV3	Uncharacterized protein	LOC100522154		Protein C530008M17Rik OS=Mus musculus GN=C530008M17Rik PE=2 SV=1	111.5							1.02846	0.859916	1.11347	0.772288		0.836123		0.923654
F1RTV4	Amidophosphoribosyltransferase	PPAT			57.436	1.22013	0.740015	1.03661	1.20527	0.711484	1.03404	1.10886	0.871163	1.04951	0.744405	0.0315257	0.657184	0.00370982	1.13272	0.0558474
F1RTV5	Uncharacterized protein	PAICS	Multifunctional protein ADE2 OS=Homo sapiens GN=PAICS PE=1 SV=3	Multifunctional protein ADE2 OS=Mus musculus GN=Paics PE=1 SV=4	47.331	0.926685	1.2188	0.863008	0.819114	1.32668	0.894504	0.795665	1.34484	0.855948	1.48857	0.00507857	1.53074	0.00134001	0.972452	0.618165
F1RTV6	Uncharacterized protein	SRP72	Signal recognition particle subunit SRP72 OS=Homo sapiens GN=SRP72 PE=1 SV=3	Signal recognition particle subunit SRP72 OS=Mus musculus GN=Srp72 PE=2 SV=1	45.844	1.10741	0.815724	1.06927	1.12283	0.860727	1.05047	1.12911	0.742337	1.16043	0.737398	0.0040535	0.720018	0.0099307	1.02414	0.520198
F1RTW4	Uncharacterized protein	TMA16	Translation machinery-associated protein 16 OS=Homo sapiens GN=TMA16 PE=1 SV=2	Translation machinery-associated protein 16 OS=Mus musculus GN=Tma16 PE=2 SV=1	24.154	1.02156	0.950374	1.03144	1.04418	1.04663	0.924121	1.04149	0.928002	1.04492	0.974846	0.658497	0.941355	0.234235	1.03558	0.451211
F1RTW7	Uncharacterized protein	ABI1	Abl interactor 1 OS=Homo sapiens GN=ABI1 PE=1 SV=4	Abl interactor 1 OS=Mus musculus GN=Abi1 PE=2 SV=1	37.58	1.08593	0.890837	1.02131	1.06112	0.870794	1.05795	1.06387	0.890535	1.05068	0.847351	0.000791631	0.825986	6.65834e-05	1.02587	0.127944
F1RTX5	Uncharacterized protein	NAF1	H/ACA ribonucleoprotein complex non-core subunit NAF1 OS=Homo sapiens GN=NAF1 PE=1 SV=2	H/ACA ribonucleoprotein complex non-core subunit NAF1 OS=Mus musculus GN=Naf1 PE=1 SV=2	50.236
F1RTX9	Uncharacterized protein	RAPGEF2	Rap guanine nucleotide exchange factor 2 OS=Homo sapiens GN=RAPGEF2 PE=1 SV=1	Rap guanine nucleotide exchange factor 2 OS=Mus musculus GN=Rapgef2 PE=1 SV=2	182.11	0.972896	1.08551	0.964443	1.0906	0.79645	1.09272	1.10729	0.823812	1.07747	0.863186	0.258466	0.853346	0.229795	1.01153	0.846971
F1RTY6	Uncharacterized protein	PPID	Peptidyl-prolyl cis-trans isomerase D OS=Homo sapiens GN=PPID PE=1 SV=3	Peptidyl-prolyl cis-trans isomerase D OS=Mus musculus GN=Ppid PE=1 SV=3	40.75	1.18756	0.727784	1.0727	1.14558	0.733212	1.0771	1.08648	0.885864	1.02597	0.738992	0.0248346	0.686293	0.00794418	1.07679	0.0903815
F1RTZ0	Uncharacterized protein	RRS1	Ribosome biogenesis regulatory protein homolog OS=Homo sapiens GN=RRS1 PE=1 SV=2	Ribosome biogenesis regulatory protein homolog OS=Mus musculus GN=Rrs1 PE=2 SV=1	42.006	1.00789	1.03076	0.964645	0.996828	1.08207	0.930531				1.11485	0.0873796	1.05393	0.270817	1.0578	0.165715
F1RTZ5	Uncharacterized protein	VCPIP1	Deubiquitinating protein VCIP135 OS=Homo sapiens GN=VCPIP1 PE=1 SV=2	Deubiquitinating protein VCIP135 OS=Mus musculus GN=Vcpip1 PE=2 SV=1	101.03	1.13836	0.727893	1.12246	1.14717	0.702955	1.12713	1.08272	0.867652	1.05626	0.695283	0.0117184	0.682401	0.0113441	1.01888	0.53333
F1RU02	Uncharacterized protein	ARFGEF1	Brefeldin A-inhibited guanine nucleotide-exchange protein 1 OS=Homo sapiens GN=ARFGEF1 PE=1 SV=2	Brefeldin A-inhibited guanine nucleotide-exchange protein 1 OS=Mus musculus GN=Arfgef1 PE=2 SV=1	207.62	1.03291	0.836055	1.11929	1.08735	0.750366	1.10576	1.0961	0.70687	1.20408	0.668768	0.00176926	0.713008	0.00547632	0.937953	0.13665
F1RU09	Uncharacterized protein	NCOA2	Nuclear receptor coactivator 2 OS=Homo sapiens GN=NCOA2 PE=1 SV=2	Nuclear receptor coactivator 2 OS=Mus musculus GN=Ncoa2 PE=4 SV=1	141.26	1.15031	0.67947	1.15584	1.17911	0.70101	1.09959	1.01382	0.966858	1.02037	0.716568	0.0620791	0.702114	0.0489031	1.02059	0.745591
F1RU12	Uncharacterized protein	LACTB2	Beta-lactamase-like protein 2 OS=Homo sapiens GN=LACTB2 PE=1 SV=2	Beta-lactamase-like protein 2 OS=Mus musculus GN=Lactb2 PE=1 SV=1	32.734	0.791325	1.30761	0.909347	0.856518	1.27517	0.888782				1.43637	0.00503102	1.56737	0.0174992	0.916421	0.23778
F1RU17	Sorting nexin	SNX32			46.135	1.19741	0.567492	1.21524	1.20204	0.507362	1.22175	1.19269	0.605974	1.21637	0.460078	0.00181815	0.467919	0.00187162	0.983244	0.00479521
F1RU22	Uncharacterized protein	EFEMP2	EGF-containing fibulin-like extracellular matrix protein 2 OS=Homo sapiens GN=EFEMP2 PE=1 SV=3	EGF-containing fibulin-like extracellular matrix protein 2 OS=Mus musculus GN=Efemp2 PE=2 SV=1	49.4	1.18232	0.693532	1.11371				1.24208	0.686768	1.09089	0.6261	0.0103391	0.569336	0.0342208	1.0997	0.134734
F1RU24	Uncharacterized protein	FIBP	Acidic fibroblast growth factor intracellular-binding protein OS=Homo sapiens GN=FIBP PE=1 SV=3	Acidic fibroblast growth factor intracellular-binding protein OS=Mus musculus GN=Fibp PE=2 SV=1	41.151	0.971773	1.109	0.92608	0.979809	1.08174	0.946418	1.00101	0.905053	1.09358	1.04373	0.630443	1.0485	0.534044	0.995452	0.940311
F1RU27	Uncharacterized protein	C11orf68	UPF0696 protein C11orf68 OS=Homo sapiens GN=C11orf68 PE=1 SV=2	UPF0696 protein C11orf68 homolog OS=Mus musculus GN=Bles03 PE=2 SV=1	27.362	1.1607	0.72349	1.15642	1.11704	0.751832	1.10093	1.11923	0.733423	1.15655	0.646986	0.000454413	0.650211	9.47573e-05	0.99504	0.821515
F1RU28	Uncharacterized protein	DRAP1	Dr1-associated corepressor OS=Homo sapiens GN=DRAP1 PE=1 SV=3	Dr1-associated corepressor OS=Mus musculus GN=Drap1 PE=2 SV=2	22.314	0.575998	1.8804	0.58214	0.685271	1.84649	0.541842	0.615747	1.8383	0.51621	3.39301	2.61251e-06	2.96491	0.000129964	1.14439	0.116602
F1RU31	Uncharacterized protein	SART1	U4/U6.U5 tri-snRNP-associated protein 1 OS=Homo sapiens GN=SART1 PE=1 SV=1	U4/U6.U5 tri-snRNP-associated protein 1 OS=Mus musculus GN=Sart1 PE=2 SV=1	90.81	0.895338	1.15845	0.970645	0.925387	1.19768	0.906849	0.911167	1.17835	0.901895	1.27167	0.00211425	1.29378	7.66595e-05	0.982911	0.559757
F1RU32	Uncharacterized protein	EIF1AD	Probable RNA-binding protein EIF1AD OS=Homo sapiens GN=EIF1AD PE=1 SV=1	Probable RNA-binding protein EIF1AD OS=Mus musculus GN=Eif1ad PE=2 SV=2	19.188	1.14874	0.839625	1.01074				1.18598	0.848983	0.980623	0.847967	0.0449192	0.723259	0.0272694	1.17243	0.0211838
F1RU33	Uncharacterized protein	BANF1	Barrier-to-autointegration factor OS=Homo sapiens GN=BANF1 PE=1 SV=1	Barrier-to-autointegration factor OS=Mus musculus GN=Banf1 PE=1 SV=1	10.044	1.05933	1.0006	0.948657	1.10781	1.35501	0.565883	1.32983	0.857644	0.846947	1.36069	0.207856	0.918868	0.61442	1.48083	0.0611516
F1RU38	Uncharacterized protein	SF3B2	Splicing factor 3B subunit 2 OS=Homo sapiens GN=SF3B2 PE=1 SV=2	Protein Sf3b2 OS=Mus musculus GN=Sf3b2 PE=2 SV=1	98.148	0.890577	1.22351	0.892189	0.903102	1.18889	0.882901	0.924638	1.18303	0.837926	1.37597	0.000158911	1.32266	7.89826e-05	1.0403	0.162229
F1RU39	Uncharacterized protein	PACS1	Phosphofurin acidic cluster sorting protein 1 OS=Homo sapiens GN=PACS1 PE=1 SV=2	Phosphofurin acidic cluster sorting protein 1 OS=Mus musculus GN=Pacs1 PE=2 SV=2	93.494	0.955955	0.980912	1.05774	0.962962	0.914932	1.10894				0.874999	0.0901687	0.987976	0.785949	0.885648	0.124264
F1RU40	Uncharacterized protein	KLC2	Kinesin light chain 2 OS=Homo sapiens GN=KLC2 PE=1 SV=1	Kinesin light chain 2 OS=Mus musculus GN=Klc2 PE=1 SV=1	69.655	1.00188	1.04049	0.958479	0.960579	1.06574	0.978143	0.935049	1.04891	0.965635	1.08713	0.00112041	1.08891	0.0347107	0.998365	0.944046
F1RU48	Uncharacterized protein	LOC100520004	Cathepsin F OS=Homo sapiens GN=CTSF PE=1 SV=1	Cathepsin F OS=Mus musculus GN=Ctsf PE=2 SV=1	51.116	1.04396	0.903017	1.06436	0.989169	1.01782	0.994205	1.0994	0.86241	1.06059	0.892309	0.122358	0.888498	0.116969	1.00429	0.915294
F1RU52	Uncharacterized protein	LOC100626654	Dipeptidyl peptidase 3 OS=Homo sapiens GN=DPP3 PE=1 SV=2	Dipeptidyl peptidase 3 OS=Mus musculus GN=Dpp3 PE=2 SV=2	82.737	0.939142	1.27203	0.806171	0.951407	1.06198	0.978487	0.883147	1.21827	0.914966	1.31584	0.0263174	1.2807	0.0428616	1.02744	0.684806
F1RU54	Uncharacterized protein	MRPL11	39S ribosomal protein L11, mitochondrial OS=Homo sapiens GN=MRPL11 PE=1 SV=1	39S ribosomal protein L11, mitochondrial OS=Mus musculus GN=Mrpl11 PE=2 SV=1	20.774	0.760938	1.57104	0.696092	0.785498	1.46895	0.782955	0.823211	1.34164	0.82126	1.9048	0.00232264	1.84907	0.00645207	1.03014	0.615311
F1RU62	Uncharacterized protein	STAG2	Cohesin subunit SA-2 OS=Homo sapiens GN=STAG2 PE=1 SV=3	Cohesin subunit SA-2 OS=Mus musculus GN=Stag2 PE=2 SV=1	132.82	0.975488	1.22964	0.812301	0.952305	1.14893	0.888817	0.869585	1.2476	0.882862	1.40333	0.00106793	1.29627	0.00337796	1.08259	0.158458
F1RU72	Uncharacterized protein	THOC2	THO complex subunit 2 OS=Homo sapiens GN=THOC2 PE=1 SV=2	THO complex subunit 2 OS=Mus musculus GN=Thoc2 PE=1 SV=1	183.82	1.12014	0.830803	1.01405	1.07608	0.812202	1.06802	1.06617	0.851011	1.03714	0.799567	0.000683469	0.764475	0.000452966	1.0459	0.104587
F1RU77	Uncharacterized protein	---	Dedicator of cytokinesis protein 11 OS=Homo sapiens GN=DOCK11 PE=1 SV=2	Dedicator of cytokinesis protein 11 OS=Mus musculus GN=Dock11 PE=1 SV=1	202.81	1.18781	0.740855	1.08771				1.2764	0.607707	1.13827	0.605828	0.0659376	0.54726	0.0284068	1.10702	0.176351
F1RUA4	Uncharacterized protein	RNF113A	RING finger protein 113A OS=Homo sapiens GN=RNF113A PE=1 SV=1	Protein Rnf113a1 OS=Mus musculus GN=Rnf113a1 PE=2 SV=1	39.029
F1RUA7	Uncharacterized protein	NKAP	NF-kappa-B-activating protein OS=Homo sapiens GN=NKAP PE=1 SV=1	NF-kappa-B-activating protein OS=Mus musculus GN=Nkap PE=2 SV=1	47.209	1.01017	1.00686	0.984422	1.05926	1.03406	0.915687	1.04498	0.995632	0.933996	1.07143	0.0609468	0.975001	0.237418	1.0989	0.0248268
F1RUC1	Uncharacterized protein	---	Cullin-4B OS=Homo sapiens GN=CUL4B PE=1 SV=4	Cullin-4B OS=Mus musculus GN=Cul4b PE=1 SV=1	78.934	0.968816	1.21012	0.860254	1.03254	1.08339	0.896657	0.953071	1.35746	0.684198	1.49562	0.0183805	1.23576	0.0884832	1.21028	0.107508
F1RUD6	Uncharacterized protein	FAM65B	Protein FAM65B OS=Homo sapiens GN=FAM65B PE=1 SV=4	Protein FAM65B OS=Mus musculus GN=Fam65b PE=2 SV=2	119.61	0.836615	1.38757	0.794772	0.789709	1.49186	0.758893	0.881443	1.27487	0.834586	1.73948	0.00612655	1.65657	0.00583726	1.05004	0.312671
F1RUE0	Uncharacterized protein	ACOT13	Acyl-coenzyme A thioesterase 13 OS=Homo sapiens GN=ACOT13 PE=1 SV=1	Acyl-coenzyme A thioesterase 13 OS=Mus musculus GN=Acot13 PE=1 SV=1	12.086	0.795544	1.14342	1.06442	0.93392	1.08173	0.928705	0.84674	1.08002	1.09945	1.06874	0.306994	1.28296	0.0128554	0.833027	0.0630047
F1RUE1	Uncharacterized protein	TDP2	Tyrosyl-DNA phosphodiesterase 2 OS=Homo sapiens GN=TDP2 PE=1 SV=1	Tyrosyl-DNA phosphodiesterase 2 OS=Mus musculus GN=Tdp2 PE=1 SV=1	40.919	1.21292	0.702131	1.07786	1.00917	0.774116	1.19079	1.15316	0.754514	1.1046	0.66131	0.0015261	0.660917	0.0156683	1.00059	0.992904
F1RUE3	Uncharacterized protein	ALDH5A1	Succinate-semialdehyde dehydrogenase, mitochondrial OS=Homo sapiens GN=ALDH5A1 PE=1 SV=2	Succinate-semialdehyde dehydrogenase, mitochondrial OS=Mus musculus GN=Aldh5a1 PE=1 SV=1	57.784	0.946991	1.04272	1.00297	0.972211	1.06378	0.982729	0.940205	1.04643	1.02099	1.04864	0.0279861	1.10265	0.00199895	0.951014	0.0297142
F1RUE4	Uncharacterized protein	GPLD1	Phosphatidylinositol-glycan-specific phospholipase D OS=Homo sapiens GN=GPLD1 PE=1 SV=3	Glycosylphosphatidylinositol specific phospholipase D1 OS=Mus musculus GN=Gpld1 PE=2 SV=1	93.151				1.20887	0.586569	1.17324				0.499955		0.48522		1.03037
F1RUE9	Uncharacterized protein	MAGED2	Melanoma-associated antigen D2 OS=Homo sapiens GN=MAGED2 PE=1 SV=2	Maged2 protein OS=Mus musculus GN=Maged2 PE=2 SV=1	63.718	1.05698	0.991869	0.938752	0.977783	1.02857	0.864079	0.971729	1.06574	0.935428	1.12706	0.0237979	1.02651	0.48993	1.09796	0.0724471
F1RUF9	Uncharacterized protein	SOX4	Transcription factor SOX-4 OS=Homo sapiens GN=SOX4 PE=1 SV=1	Transcription factor SOX-4 OS=Mus musculus GN=Sox4 PE=1 SV=2	47.523	1.22636	0.552994	1.20203	1.21141	0.64162	1.12237	1.15965	0.620349	1.23221	0.510306	0.000207919	0.504518	9.80625e-05	1.01147	0.745039
F1RUG0	Uncharacterized protein	CDKAL1	Threonylcarbamoyladenosine tRNA methylthiotransferase OS=Homo sapiens GN=CDKAL1 PE=1 SV=1	Threonylcarbamoyladenosine tRNA methylthiotransferase OS=Mus musculus GN=Cdkal1 PE=2 SV=1	65.189	0.94008	1.18549	0.885067	0.908634	1.15873	0.943723	1.04074	1.01981	0.943107	1.21362	0.0475245	1.16424	0.0756081	1.04241	0.443867
F1RUG1	Uncharacterized protein	GNL3L	Guanine nucleotide-binding protein-like 3-like protein OS=Homo sapiens GN=GNL3L PE=1 SV=1	Guanine nucleotide-binding protein-like 3-like protein OS=Mus musculus GN=Gnl3l PE=1 SV=1	64.672	1.04149	0.911583	0.992805	1.0553	1.00432	0.945534	1.05875	1.03187	1.00714	1.00078	0.986314	0.934155	0.195116	1.07132	0.0547408
F1RUG8	Uncharacterized protein	---	Constitutive coactivator of PPAR-gamma-like protein 2 OS=Homo sapiens GN=FAM120C PE=2 SV=3	Constitutive coactivator of PPAR-gamma-like protein 2 OS=Mus musculus GN=Fam120c PE=2 SV=3	37.251				0.961998	1.11701	0.931624				1.199		1.16114		1.0326
F1RUH2	Uncharacterized protein	MBOAT1	Lysophospholipid acyltransferase 1 OS=Homo sapiens GN=MBOAT1 PE=1 SV=1	Lysophospholipid acyltransferase 1 OS=Mus musculus GN=Mboat1 PE=1 SV=1	56.696
F1RUH5	Uncharacterized protein	DEK	Protein DEK OS=Homo sapiens GN=DEK PE=1 SV=1	Protein DEK (Fragment) OS=Mus musculus GN=Dek PE=2 SV=1	41.786	1.10406	0.949613	0.979497	1.19704	0.979124	0.860934	1.12765	0.958441	0.923158	1.04472	0.351972	0.84205	0.0161207	1.24069	0.00819971
F1RUH6	Uncharacterized protein	KDM1B	Lysine-specific histone demethylase 1B OS=Homo sapiens GN=KDM1B PE=1 SV=3	Lysine-specific histone demethylase 1B OS=Mus musculus GN=Kdm1b PE=1 SV=1	92.15							1.12406	0.848925	1.03718	0.818497		0.755232		1.08377
F1RUH9	Uncharacterized protein	FAM8A1	Protein FAM8A1 OS=Homo sapiens GN=FAM8A1 PE=1 SV=1	Protein C78339 OS=Mus musculus GN=C78339 PE=2 SV=1	43.132	0.893656	1.20429	0.910318	0.928507	1.2256	0.887418	0.937388	1.0101	1.02733	1.21767	0.0762719	1.24658	0.0754544	0.976808	0.670801
F1RUI1	Uncharacterized protein	HSD17B10	3-hydroxyacyl-CoA dehydrogenase type-2 OS=Homo sapiens GN=HSD17B10 PE=1 SV=3	17beta-hydroxysteroid dehydrogenase type 10/short chain L-3-hydroxyacyl-CoA dehydrogenase OS=Mus musculus GN=Hsd17b10 PE=2 SV=1	27.159	0.819288	1.37044	0.88515							1.54826		1.67272		0.925593
F1RUI9	Uncharacterized protein	LOC100523107	Melanoma-associated antigen D4 OS=Homo sapiens GN=MAGED4 PE=1 SV=3	Melanoma-associated antigen D1 OS=Mus musculus GN=Maged1 PE=1 SV=1	81.377	1.09715	0.72862	1.11999	1.07256	0.88494	1.03499	1.07295	0.75241	1.17987	0.709467	0.00777321	0.729638	0.0240002	0.972355	0.542839
F1RUK9	Uncharacterized protein	FAM208B	Protein FAM208B OS=Homo sapiens GN=FAM208B PE=1 SV=1	Protein FAM208B OS=Mus musculus GN=Fam208b PE=2 SV=2	248.75	0.784178	1.43545	0.798906				0.654991	1.61125	0.706397	2.02398	0.0336509	2.11699	0.022539	0.956065	0.72131
F1RUL1	Uncharacterized protein	RBM17	Splicing factor 45 OS=Homo sapiens GN=RBM17 PE=1 SV=1	Splicing factor 45 OS=Mus musculus GN=Rbm17 PE=1 SV=1	45.336	0.97732	1.0154	0.980463	0.888382	1.21282	0.959654	0.968471	1.06297	0.929955	1.14673	0.135271	1.16125	0.108034	0.987493	0.732188
F1RUN1	Uncharacterized protein	USP6NL	USP6 N-terminal-like protein OS=Homo sapiens GN=USP6NL PE=1 SV=3	USP6 N-terminal-like protein OS=Mus musculus GN=Usp6nl PE=1 SV=2	91.163
F1RUN2	Serum albumin	ALB			69.669	1.16059	0.605719	1.19736	0.921056	0.600235	1.39796	1.04763	0.756711	1.20855	0.515966	0.00217866	0.627196	0.0128777	0.822655	0.0772798
F1RUN3	Uncharacterized protein	COX18	Mitochondrial inner membrane protein COX18 OS=Homo sapiens GN=COX18 PE=2 SV=1	COX18 cytochrome c oxidase assembly homolog (S. cerevisiae), isoform CRA_c OS=Mus musculus GN=Cox18 PE=3 SV=1	37.163	0.946562	1.15794	0.904353	1.03375	0.934033	1.02725				1.08302	0.609757	1.05638	0.708142	1.02522	0.780097
F1RUP0	Uncharacterized protein	ECHDC3	Enoyl-CoA hydratase domain-containing protein 3, mitochondrial OS=Homo sapiens GN=ECHDC3 PE=1 SV=2	Enoyl-CoA hydratase domain-containing protein 3, mitochondrial OS=Mus musculus GN=Echdc3 PE=2 SV=1	32.259	0.95691	0.983534	1.05447				0.891416	0.878802	1.21971	0.818908	0.192636	1.00758	0.921774	0.812748	0.201974
F1RUP2	Uncharacterized protein	GRSF1	G-rich sequence factor 1 OS=Homo sapiens GN=GRSF1 PE=1 SV=3	G-rich sequence factor 1 OS=Mus musculus GN=Grsf1 PE=1 SV=2	52.922	0.968993	1.10705	0.930401	1.09896	1.03022	0.928677	0.951039	1.2126	0.833065	1.24431	0.0328033	1.1096	0.193749	1.12141	0.135582
F1RUP4	Uncharacterized protein	---	Regulator of nonsense transcripts 2 OS=Homo sapiens GN=UPF2 PE=1 SV=1	Protein Upf2 OS=Mus musculus GN=Upf2 PE=2 SV=1	53.703				1.11211	0.825304	1.05136				0.784988		0.742108		1.05778
F1RUP7	Uncharacterized protein	NUDT5	ADP-sugar pyrophosphatase OS=Homo sapiens GN=NUDT5 PE=1 SV=1	ADP-sugar pyrophosphatase OS=Mus musculus GN=Nudt5 PE=1 SV=1	24.039	1.03603	0.999423	0.967585	0.797241	1.53019	0.719503	0.941392	1.17728	0.877023	1.44568	0.119098	1.33598	0.174147	1.08212	0.522965
F1RUR6	Uncharacterized protein	LOC100739738	Cullin-2 OS=Homo sapiens GN=CUL2 PE=1 SV=2	Cullin-2 (Fragment) OS=Mus musculus GN=Cul2 PE=2 SV=1	12.9	1.1808	0.732033	1.07987	1.21718	0.698638	1.06681	1.05542	0.814256	1.13431	0.684223	0.00231625	0.650063	0.0037293	1.05255	0.367062
F1RUR8	Uncharacterized protein	PARD3	Partitioning defective 3 homolog OS=Homo sapiens GN=PARD3 PE=1 SV=2	Par-3 (Partitioning defective 3) homolog (C. elegans) OS=Mus musculus GN=Pard3 PE=2 SV=1	121.61	0.967565	1.01666	1.01441	1.04049	0.956223	1.00152	0.916643	1.06196	1.01439	1.00149	0.965394	1.03766	0.48129	0.965146	0.430856
F1RUS8	Uncharacterized protein	TBCC	Tubulin-specific chaperone C OS=Homo sapiens GN=TBCC PE=1 SV=2	Tubulin-specific chaperone C OS=Mus musculus GN=Tbcc PE=2 SV=1	38.654	1.1201	0.597045	1.25888	1.1931	0.668404	1.11552	1.2084	0.680475	1.13302	0.554802	0.00162139	0.552567	0.000155631	1.00404	0.933737
F1RUT0	Uncharacterized protein	BRMS1	Breast cancer metastasis-suppressor 1 OS=Homo sapiens GN=BRMS1 PE=1 SV=1	Breast cancer metastasis-suppressor 1 homolog OS=Mus musculus GN=Brms1 PE=2 SV=1	28.426	1.12617	0.902919	0.973466				1.03475	1.04638	0.922133	1.02833	0.774616	0.902071	0.358077	1.13996	0.159844
F1RUT1	Uncharacterized protein	---	RNA-binding protein 4 OS=Homo sapiens GN=RBM4 PE=1 SV=1	RNA-binding protein 4 OS=Mus musculus GN=Rbm4 PE=1 SV=1	39.513	1.01413	0.901433	1.07727	0.966366	0.910088	1.1101				0.828175	0.0424557	0.914681	0.165779	0.905424	0.0836952
F1RUT9	Uncharacterized protein	UBR2	E3 ubiquitin-protein ligase UBR2 OS=Homo sapiens GN=UBR2 PE=1 SV=1	E3 ubiquitin-protein ligase UBR2 OS=Mus musculus GN=Ubr2 PE=1 SV=2	159.27	1.133	0.790431	1.08624	1.16995	0.679283	1.11207				0.668568	0.0828496	0.638189	0.0611214	1.0476	0.160747
F1RUV5	Uncharacterized protein	PC	Pyruvate carboxylase, mitochondrial OS=Homo sapiens GN=PC PE=1 SV=2	Pyruvate carboxylase OS=Mus musculus GN=Pcx PE=2 SV=1	79.448	0.971971	1.13739	0.918658	1.01272	1.05027	0.953383	0.885158	1.15453	0.955691	1.18193	0.0228269	1.16459	0.0347377	1.01489	0.751001
F1RUV6	Uncharacterized protein	LOC100514752	Pyruvate carboxylase, mitochondrial OS=Homo sapiens GN=PC PE=1 SV=2	Pyruvate carboxylase OS=Mus musculus GN=Pcx PE=3 SV=1	37.905	0.919065	1.19008	0.866497	0.962222	1.19817	0.866937	0.91462	1.17906	0.899565	1.35485	0.000147249	1.2759	0.00134832	1.06187	0.0494318
F1RUW0	Uncharacterized protein	BYSL	Bystin OS=Homo sapiens GN=BYSL PE=1 SV=3	Bystin OS=Mus musculus GN=Bysl PE=1 SV=3	48.685	1.05052	0.939505	1.00916	1.0875	0.932739	1.0163	1.05048	0.953473	1.00025	0.933903	0.00130763	0.88622	0.00342724	1.0538	0.0351142
F1RUW1	Uncharacterized protein	MED20	Mediator of RNA polymerase II transcription subunit 20 OS=Homo sapiens GN=MED20 PE=1 SV=1	Mediator of RNA polymerase II transcription subunit 20 OS=Mus musculus GN=Med20 PE=1 SV=1	23.119	1.11819	0.891646	0.991073							0.899677		0.797401		1.12826
F1RUW3	Uncharacterized protein	TOMM6	Mitochondrial import receptor subunit TOM6 homolog OS=Homo sapiens GN=TOMM6 PE=1 SV=1	Mitochondrial import receptor subunit TOM6 homolog OS=Mus musculus GN=Tomm6 PE=3 SV=1	8.0009	1.01122	1.02425	0.967549	1.03835	1.01974	0.947463	0.892126	0.976927	1.12139	0.994902	0.935116	1.02693	0.624067	0.968809	0.680251
F1RUX1	Coronin	CORO1B			55.117	1.14463	0.852132	0.965491	1.09716	0.831863	1.03173	1.07727	1.03378	0.876836	0.945625	0.546382	0.818839	0.0779757	1.15484	0.0630492
F1RUX3	Protein-serine/threonine kinase	ADRBK1			75.618	1.10874	0.839914	1.04705	1.09481	0.753608	1.13043				0.73182	0.039824	0.723161	0.082737	1.01197	0.807426
F1RUX5	Uncharacterized protein	POLD4	DNA polymerase delta subunit 4 OS=Homo sapiens GN=POLD4 PE=1 SV=1	DNA polymerase delta subunit 4 OS=Mus musculus GN=Pold4 PE=2 SV=1	12.565	1.11903	0.898968	0.983611							0.913947		0.803349		1.13767
F1RUX7	Uncharacterized protein	RAD9A	Cell cycle checkpoint control protein RAD9A OS=Homo sapiens GN=RAD9A PE=1 SV=1	Cell cycle checkpoint control protein RAD9A OS=Mus musculus GN=Rad9a PE=1 SV=1	42.89	1.17225	0.762573	1.05974							0.719583		0.65052		1.10617
F1RUY4	Uncharacterized protein	FOXP4	Forkhead box protein P4 OS=Homo sapiens GN=FOXP4 PE=1 SV=1	Forkhead box protein P4 OS=Mus musculus GN=Foxp4 PE=2 SV=1	77.818				1.09652	0.965024	0.967666	0.948032	1.0327	1.01094	1.00966	0.83738	0.977097	0.810853	1.03333	0.735018
F1RUZ0	Uncharacterized protein	RPS6KB2	Ribosomal protein S6 kinase beta-2 OS=Homo sapiens GN=RPS6KB2 PE=1 SV=2	Ribosomal protein S6 kinase beta-2 OS=Mus musculus GN=Rps6kb2 PE=1 SV=1	53.577	1.16219	0.730243	1.09853	1.1211	0.818369	1.04923	1.11857	0.819107	1.07186	0.735403	0.00375022	0.696006	0.00220481	1.0566	0.0388963
F1RUZ6	Uncharacterized protein	AIP	AH receptor-interacting protein OS=Homo sapiens GN=AIP PE=1 SV=2	AH receptor-interacting protein OS=Mus musculus GN=Aip PE=1 SV=1	37.71	1.06573	0.87614	1.02013	1.04767	0.874996	1.05009	1.01066	1.02624	0.985357	0.908956	0.198169	0.889031	0.137908	1.02241	0.409525
F1RV14	Uncharacterized protein	PRKCA	Protein kinase C alpha type OS=Homo sapiens GN=PRKCA PE=1 SV=4	Protein kinase C OS=Mus musculus GN=Prkca PE=2 SV=1	52.61	1.0848	0.909337	1.07036	0.958401	1.00974	1.02951	1.1175	0.948675	0.943881	0.942177	0.286648	0.907317	0.175174	1.03842	0.56078
F1RV20	Uncharacterized protein	GNA13	Guanine nucleotide-binding protein subunit alpha-13 OS=Homo sapiens GN=GNA13 PE=1 SV=2	Guanine nucleotide-binding protein subunit alpha-13 OS=Mus musculus GN=Gna13 PE=1 SV=1	44.272	1.12586	0.743819	1.11132	1.03867	0.868302	1.08494	1.06693	0.774897	1.19804	0.703243	0.00276678	0.738681	0.00508534	0.952025	0.277836
F1RV23	cAMP-dependent protein kinase type I-alpha regulatory subunit	PRKAR1A			42.92	1.1962	0.516036	1.30308	1.16659	0.602745	1.19766				0.447381	0.0108563	0.4735	0.0272699	0.944838	0.40493
F1RV24	Uncharacterized protein	FAM20A	Protein FAM20A OS=Homo sapiens GN=FAM20A PE=1 SV=4	Protein FAM20A OS=Mus musculus GN=Fam20a PE=1 SV=1	46.565
F1RV28	Uncharacterized protein	MAP2K6	Dual specificity mitogen-activated protein kinase kinase 6 OS=Homo sapiens GN=MAP2K6 PE=1 SV=1	Dual specificity mitogen-activated protein kinase kinase 6 OS=Mus musculus GN=Map2k6 PE=1 SV=1	37.536	1.22666	0.651682	1.11146	1.21964	0.580217	1.16898	1.18355	0.689174	1.1419	0.561332	0.000796764	0.529244	0.00091258	1.06063	0.0336708
F1RV31	Uncharacterized protein	SLC39A11	Zinc transporter ZIP11 OS=Homo sapiens GN=SLC39A11 PE=2 SV=3	Zinc transporter ZIP11 OS=Mus musculus GN=Slc39a11 PE=2 SV=1	23.128				0.932366	1.17585	0.906883	0.972724	1.09058	0.934732	1.23068	0.100071	1.18967	0.102496	1.03447	0.338347
F1RV32	Uncharacterized protein	COG1	Conserved oligomeric Golgi complex subunit 1 OS=Homo sapiens GN=COG1 PE=1 SV=1	Conserved oligomeric Golgi complex subunit 1 OS=Mus musculus GN=Cog1 PE=2 SV=3	108.86	0.911564	0.942118	1.13382	1.11443	0.706246	1.15422	1.0478	0.804973	1.1505	0.713482	0.0397363	0.798145	0.0861688	0.893925	0.177334
F1RV35	Uncharacterized protein	CDC42EP4	Cdc42 effector protein 4 OS=Homo sapiens GN=CDC42EP4 PE=1 SV=1	Cdc42 effector protein 4 OS=Mus musculus GN=Cdc42ep4 PE=1 SV=1	38.003	0.793273	1.45921	0.768848	0.812313	1.39333	0.825078				1.78963	0.00518875	1.77664	0.0225148	1.00732	0.871759
F1RV39	Uncharacterized protein	LOC100522132	COMM domain-containing protein 5 OS=Homo sapiens GN=COMMD5 PE=1 SV=1	COMM domain-containing protein 5 OS=Mus musculus GN=Commd5 PE=2 SV=1	24.84	1.14187	0.659882	1.18149	1.16519	0.76063	1.05977	1.21153	0.769763	1.03616	0.668294	0.00382967	0.622487	0.00121343	1.07359	0.209219
F1RV56	Uncharacterized protein	C8orf33	UPF0488 protein C8orf33 OS=Homo sapiens GN=C8orf33 PE=1 SV=1	UPF0488 protein C8orf33 homolog OS=Mus musculus PE=2 SV=1	15.734	1.22094	0.734153	1.04123							0.705084		0.601301		1.1726
F1RV70	NADPH:adrenodoxin oxidoreductase, mitochondrial	FDXR			54.193	0.718136	1.28885	1.00777	0.793399	1.29575	0.923904	0.811986	1.14849	1.01951	1.26495	0.0149623	1.60665	0.00253971	0.787318	0.00737283
F1RV76	Uncharacterized protein	MCUR1	Mitochondrial calcium uniporter regulator 1 OS=Homo sapiens GN=MCUR1 PE=1 SV=1	Mitochondrial calcium uniporter regulator 1 OS=Mus musculus GN=Mcur1 PE=1 SV=1	40.37
F1RV77	Uncharacterized protein	RANBP9	Ran-binding protein 9 OS=Homo sapiens GN=RANBP9 PE=1 SV=1	Ran-binding protein 9 OS=Mus musculus GN=Ranbp9 PE=4 SV=1	55.144				1.1547	0.760296	1.06967	1.15941	0.789399	1.06417	0.726247	0.0264635	0.669672	0.0209143	1.08448	0.00181594
F1RV91	Uncharacterized protein	PAK1IP1	p21-activated protein kinase-interacting protein 1 OS=Homo sapiens GN=PAK1IP1 PE=1 SV=2	p21-activated protein kinase-interacting protein 1 OS=Mus musculus GN=Pak1ip1 PE=2 SV=2	43.457	1.16942	0.771045	1.05458							0.731142		0.659338		1.1089
F1RVA1	Uncharacterized protein	EEF1E1	Eukaryotic translation elongation factor 1 epsilon-1 OS=Homo sapiens GN=EEF1E1 PE=1 SV=1	Eukaryotic translation elongation factor 1 epsilon-1 OS=Mus musculus GN=Eef1e1 PE=2 SV=1	19.794	1.13138	0.612514	1.23442							0.496196		0.541388		0.916526
F1RVA6	Uncharacterized protein	XPO4	Exportin-4 OS=Homo sapiens GN=XPO4 PE=1 SV=2	Exportin-4 OS=Mus musculus GN=Xpo4 PE=2 SV=2	112.73	1.1575	0.605895	1.21659	1.13613	0.755256	1.09112	1.10724	0.786398	1.13866	0.623134	0.00474399	0.63147	0.0129024	0.9868	0.729188
F1RVB1	Lambda-crystallin homolog	CRYL1			29.753	1.29581	0.668993	1.03239	1.31419	0.573279	1.06075	1.24332	0.720163	1.05653	0.623061	0.0093462	0.509284	0.00109383	1.22341	0.00325503
F1RVC2	Uncharacterized protein	ANTXR2	Anthrax toxin receptor 2 OS=Homo sapiens GN=ANTXR2 PE=1 SV=5	Anthrax toxin receptor 2 OS=Mus musculus GN=Antxr2 PE=2 SV=1	53.413	1.0935	0.725688	1.19838	1.19434	0.617196	1.15954	1.18708	0.607903	1.21957	0.545294	0.00131728	0.56139	0.000584686	0.971328	0.421134
F1RVC4	Uncharacterized protein	---	High mobility group protein B3 OS=Homo sapiens GN=HMGB3 PE=1 SV=4	High mobility group protein B3 OS=Mus musculus GN=Hmgb3 PE=2 SV=3	22.357	0.486906	1.89129	0.703066	0.483036	2.07113	0.561426	0.408084	1.98382	0.560845	3.25761	4.3033e-05	4.31504	0.000145425	0.754944	0.0674403
F1RVC9	Uncharacterized protein	---	Heterogeneous nuclear ribonucleoprotein D0 OS=Homo sapiens GN=HNRNPD PE=1 SV=1	Heterogeneous nuclear ribonucleoprotein D0 OS=Mus musculus GN=Hnrnpd PE=1 SV=2	23.029	1.02613	1.10272	0.919592	1.03949	1.02859	0.922684	1.00744	1.02286	1.00096	1.10936	0.0488819	1.02639	0.408262	1.08083	0.0895687
F1RVD1	Uncharacterized protein	---	Heterogeneous nuclear ribonucleoprotein D-like OS=Homo sapiens GN=HNRNPDL PE=1 SV=3	Heterogeneous nuclear ribonucleoprotein D-like (Fragment) OS=Mus musculus GN=Hnrnpdl PE=4 SV=1	24.109	0.950432	0.981344	1.0196	1.00686	1.103	0.903246	0.999009	1.02784	0.965614	1.07745	0.201768	1.05273	0.282618	1.02349	0.593082
F1RVD2	Uncharacterized protein	ENOPH1	Enolase-phosphatase E1 OS=Homo sapiens GN=ENOPH1 PE=1 SV=1	Enolase-phosphatase E1 OS=Mus musculus GN=Enoph1 PE=2 SV=1	28.895	1.10116	0.886273	1.01156	1.11297	0.735746	1.1533	1.08011	0.887679	1.06978	0.775881	0.0220721	0.761844	0.031434	1.01843	0.68039
F1RVD4	Uncharacterized protein	SEC31A	Protein transport protein Sec31A OS=Homo sapiens GN=SEC31A PE=1 SV=3	Protein transport protein Sec31A OS=Mus musculus GN=Sec31a PE=1 SV=2	132.33	1.21079	0.5776	1.19908	1.22564	0.561497	1.19462	1.17162	0.666079	1.18039	0.505073	0.0023889	0.500319	0.00055155	1.0095	0.563482
F1RVE8	Uncharacterized protein	UBA6	Ubiquitin-like modifier-activating enzyme 6 OS=Homo sapiens GN=UBA6 PE=1 SV=1	Ubiquitin-like modifier-activating enzyme 6 OS=Mus musculus GN=Uba6 PE=1 SV=1	118.14	1.24628	0.534668	1.18925	1.21748	0.582042	1.18416	1.15565	0.62217	1.21678	0.484342	0.000437932	0.48043	7.11965e-05	1.00814	0.759213
F1RVF8	Uncharacterized protein	CENPC	Centromere protein C OS=Homo sapiens GN=CENPC PE=1 SV=2	Centromere protein C OS=Mus musculus GN=Cenpc PE=1 SV=2	107	1.00651	0.944459	1.04487	1.04409	0.888967	0.931899	1.04757	0.886892	1.06917	0.893095	0.108265	0.878041	0.00744653	1.01715	0.726725
F1RVH5	Peptidyl-prolyl cis-trans isomerase	LOC100524880			22.743	0.618359	1.74167	0.670338	0.705024	1.47026	0.857388	0.695112	1.52333	0.757299	2.0723	0.00221744	2.34594	0.00455096	0.883358	0.239864
F1RVH7	Uncharacterized protein	IGFBP7	Insulin-like growth factor-binding protein 7 OS=Homo sapiens GN=IGFBP7 PE=1 SV=1	Insulin-like growth factor-binding protein 7 OS=Mus musculus GN=Igfbp7 PE=2 SV=1	29.003	0.651593	1.78806	0.597509	0.720129	1.57946	0.745382	0.610025	1.73146	0.627779	2.58743	0.000298694	2.57297	0.000674174	1.00562	0.950347
F1RVI4	Phosphatidylinositol 5-phosphate 4-kinase type-2 alpha	PIP4K2A			41.284	1.18822	0.632233	1.16175	1.25345	0.565009	1.10669	1.23712	0.593858	1.21247	0.51455	0.000283	0.486873	2.20165e-05	1.05685	0.15562
F1RVI8	Uncharacterized protein	MSRB2	Methionine-R-sulfoxide reductase B2, mitochondrial OS=Homo sapiens GN=MSRB2 PE=2 SV=2	Methionine-R-sulfoxide reductase B2, mitochondrial OS=Mus musculus GN=Msrb2 PE=1 SV=1	19.898	0.815191	1.26746	0.92426	0.755518	1.36578	0.901398	0.897572	1.1173	0.9789	1.3373	0.0385064	1.51949	0.0123938	0.880096	0.0941496
F1RVJ5	Uncharacterized protein	---	Phosphoribosyltransferase domain-containing protein 1 OS=Homo sapiens GN=PRTFDC1 PE=1 SV=1	Hypoxanthine-guanine phosphoribosyltransferase OS=Mus musculus GN=Hprt1 PE=1 SV=3	16.241	1.18036	0.709516	1.10087				1.09054	0.886359	1.0305	0.748755	0.167443	0.702748	0.114063	1.06547	0.351922
F1RVJ6	Uncharacterized protein	THNSL1	Threonine synthase-like 1 OS=Homo sapiens GN=THNSL1 PE=1 SV=2	Threonine synthase-like 1 OS=Mus musculus GN=Thnsl1 PE=2 SV=1	83.272	0.983575	0.956891	1.05446	1.04047	0.988311	0.973235				0.959316	0.486626	0.961045	0.377421	0.998201	0.974338
F1RVK1	Uncharacterized protein	YME1L1	ATP-dependent zinc metalloprotease YME1L1 OS=Homo sapiens GN=YME1L1 PE=1 SV=2	ATP-dependent zinc metalloprotease YME1L1 OS=Mus musculus GN=Yme1l1 PE=2 SV=1	86.124	0.980863	1.06012	0.938105	1.04529	0.98833	0.962849	0.990717	1.06557	0.935416	1.09789	0.0525371	1.0322	0.370533	1.06364	0.0783098
F1RVK3	Acyl-CoA-binding domain-containing protein 5	ACBD5			58.341	0.841842	1.22358	0.940042	0.803591	1.39344	0.836941	0.785206	1.39307	0.804751	1.55325	0.00337533	1.64981	0.00732137	0.941475	0.345877
F1RVM0	Uncharacterized protein	LOC100518497	O-acetyl-ADP-ribose deacetylase 1 OS=Homo sapiens GN=OARD1 PE=1 SV=2	O-acetyl-ADP-ribose deacetylase 1 OS=Mus musculus GN=Oard1 PE=2 SV=2	16.978	1.17472	0.655425	1.16036	1.19185	0.736831	1.05265	1.08205	0.73467	1.17634	0.627533	0.00148403	0.616747	0.000694533	1.01749	0.722033
F1RVM6	Uncharacterized protein	---	Glutathione S-transferase P OS=Homo sapiens GN=GSTP1 PE=1 SV=2	Glutathione S-transferase P 1 OS=Mus musculus GN=Gstp1 PE=1 SV=2	23.631				1.20873	0.536513	1.21751	1.19488	0.650356	1.1702	0.497074	0.0334106	0.493785	0.0561134	1.00666	0.795099
F1RVN0	Uncharacterized protein	LOC100739163	Glutathione S-transferase P OS=Homo sapiens GN=GSTP1 PE=1 SV=2	Glutathione S-transferase P 1 OS=Mus musculus GN=Gstp1 PE=1 SV=2	22.175	1.1317	0.737358	1.11989	1.13685	0.705594	1.1227	1.11489	0.836425	1.09296	0.68336	0.00919918	0.673685	0.0096973	1.01436	0.247422
F1RVN1	Uncharacterized protein	NDUFV1	NADH dehydrogenase [ubiquinone] flavoprotein 1, mitochondrial OS=Homo sapiens GN=NDUFV1 PE=1 SV=4	NADH dehydrogenase [ubiquinone] flavoprotein 1, mitochondrial OS=Mus musculus GN=Ndufv1 PE=1 SV=1	50.569	0.92946	1.09174	0.980554	0.935353	1.11336	0.963905	0.90186	1.0794	0.994376	1.11762	0.00103122	1.18717	0.000274097	0.941418	0.0140947
F1RVP8	V-type proton ATPase subunit a	TCIRG1			93.942	1.02833	0.892268	1.07267	1.08813	0.881246	1.02399	1.06198	0.934556	1.00859	0.872094	0.00683917	0.852012	0.0027627	1.02357	0.400724
F1RVQ4	Uncharacterized protein	LRP5	Low-density lipoprotein receptor-related protein 5 OS=Homo sapiens GN=LRP5 PE=1 SV=2	Low-density lipoprotein receptor-related protein 5 OS=Mus musculus GN=Lrp5 PE=1 SV=3	120.11	0.803911	1.35226	0.856979							1.57794		1.68211		0.938076
F1RVS1	Uncharacterized protein	---	Cap-specific mRNA (nucleoside-2'-O-)-methyltransferase 1 OS=Homo sapiens GN=CMTR1 PE=1 SV=1	Cap-specific mRNA (nucleoside-2'-O-)-methyltransferase 1 OS=Mus musculus GN=Cmtr1 PE=1 SV=1	30.072	1.08142	0.894138	1.01271	1.19326	0.762216	1.01435	1.17771	0.80982	1.02714	0.807469	0.0350398	0.714337	0.00332288	1.13038	0.0606758
F1RVS3	Uncharacterized protein	TBC1D22B	TBC1 domain family member 22B OS=Homo sapiens GN=TBC1D22B PE=1 SV=3	Protein Tbc1d22b OS=Mus musculus GN=Tbc1d22b PE=2 SV=1	58.991	1.11073	0.800151	1.08161							0.739775		0.720384		1.02692
F1RVS8	Uncharacterized protein	MTCH1	Mitochondrial carrier homolog 1 OS=Homo sapiens GN=MTCH1 PE=1 SV=1	Mitochondrial carrier homolog 1 OS=Mus musculus GN=Mtch1 PE=2 SV=1	41.558	0.820722	1.29464	0.89433	0.899026	1.2448	0.876624	1.08697	1.1616	0.759795	1.46243	0.00250028	1.31864	0.0448355	1.10905	0.378728
F1RVV9	NADPH-dependent diflavin oxidoreductase 1	NDOR1			66.662							1.14709	0.734293	1.13026	0.649668		0.640135		1.01489
F1RVX3	Uncharacterized protein	GGA3	ADP-ribosylation factor-binding protein GGA3 OS=Homo sapiens GN=GGA3 PE=1 SV=1	ADP-ribosylation factor-binding protein GGA3 OS=Mus musculus GN=Gga3 PE=2 SV=2	76.276							0.989663	1.07951	0.930291	1.1604		1.09079		1.06382
F1RVX4	Uncharacterized protein	MRPS7	28S ribosomal protein S7, mitochondrial OS=Homo sapiens GN=MRPS7 PE=1 SV=2	28S ribosomal protein S7, mitochondrial OS=Mus musculus GN=Mrps7 PE=2 SV=1	28.098	0.938417	1.15579	0.953649	0.914383	1.32463	0.792163				1.42078	0.0882251	1.33874	0.161233	1.06128	0.6269
F1RVX6	Uncharacterized protein	NUP85	Nuclear pore complex protein Nup85 OS=Homo sapiens GN=NUP85 PE=1 SV=1	Nuclear pore complex protein Nup85 OS=Mus musculus GN=Nup85 PE=1 SV=1	74.615	1.15614	0.756595	1.11623	1.14345	0.754165	1.0662	1.10634	0.856984	1.11134	0.718856	0.00454673	0.695182	0.00366301	1.03405	0.162295
F1RVX9	Uncharacterized protein	NELFB	Negative elongation factor B OS=Homo sapiens GN=NELFB PE=1 SV=1	Negative elongation factor B OS=Mus musculus GN=Nelfb PE=1 SV=2	65.657	1.11658	0.898223	1.0393	1.10865	0.793532	1.08874	1.02911	0.830485	1.12667	0.774951	0.00399498	0.77504	0.00428206	0.999885	0.997524
F1RVY4	Uncharacterized protein	RABL6	Rab-like protein 6 OS=Homo sapiens GN=RABL6 PE=1 SV=2	Rab-like protein 6 OS=Mus musculus GN=Rabl6 PE=1 SV=2	68.966
F1RVY5	Uncharacterized protein	SAP30BP	SAP30-binding protein OS=Homo sapiens GN=SAP30BP PE=1 SV=1	SAP30-binding protein OS=Mus musculus GN=Sap30bp PE=2 SV=2	33.824	1.01673	1.03262	0.954858	0.981858	1.0027	1.01424	0.918483	1.02467	1.04983	1.0136	0.677371	1.04899	0.234468	0.966263	0.443143
F1RVY7	Uncharacterized protein	GALK1	Galactokinase OS=Homo sapiens GN=GALK1 PE=1 SV=1	Galactokinase OS=Mus musculus GN=Galk1 PE=2 SV=2	44.993	1.25723	0.497123	1.20369	1.24574	0.539996	1.1694	1.15884	0.640647	1.1845	0.471602	0.00313536	0.458179	0.000384331	1.0293	0.381855
F1RVY8	Uncharacterized protein	UNK	RING finger protein unkempt homolog OS=Homo sapiens GN=UNK PE=1 SV=2	RING finger protein unkempt homolog OS=Mus musculus GN=Unk PE=2 SV=1	87.997	0.662285	1.67544	0.690773				1.15493	0.821691	1.03612	1.44603	0.527292	1.37416	0.576613	1.0523	0.895837
F1RVZ0	Uncharacterized protein	TRIM47	Tripartite motif-containing protein 47 OS=Homo sapiens GN=TRIM47 PE=1 SV=2	Tripartite motif-containing protein 47 OS=Mus musculus GN=Trim47 PE=2 SV=2	70.416
F1RVZ1	Acyl-coenzyme A oxidase	ACOX1			65.208	0.803487	1.34764	0.842122	0.931067	1.27463	0.820964	0.850076	1.17012	0.967472	1.44167	0.00512926	1.46729	0.00434136	0.98254	0.808524
F1RVZ5	Uncharacterized protein	FAM69B	Protein FAM69B OS=Homo sapiens GN=FAM69B PE=2 SV=3	Protein FAM69B OS=Mus musculus GN=Fam69b PE=1 SV=1	46.197
F1RW03	Uncharacterized protein	MRPL38	39S ribosomal protein L38, mitochondrial OS=Homo sapiens GN=MRPL38 PE=1 SV=2	39S ribosomal protein L38, mitochondrial OS=Mus musculus GN=Mrpl38 PE=2 SV=2	44.585	0.892046	1.24686	0.872839	0.880107	1.19952	0.933878	0.932503	1.09808	0.962261	1.28006	0.0120616	1.3105	0.0150721	0.976771	0.532251
F1RW05	Uncharacterized protein	TEN1	CST complex subunit TEN1 OS=Homo sapiens GN=TEN1 PE=1 SV=2	CST complex subunit TEN1 OS=Mus musculus GN=Ten1 PE=1 SV=1	13.763	1.16798	0.654226	1.16279							0.562636		0.560137		1.00446
F1RW08	Signal recognition particle subunit SRP68	SRP68			70.508	1.08512	0.81701	1.07343	1.05179	0.835663	1.08124	1.12126	0.743688	1.14061	0.72721	0.00142524	0.735494	0.00173453	0.988737	0.693607
F1RW09	Uncharacterized protein	EXOC7	Exocyst complex component 7 OS=Homo sapiens GN=EXOC7 PE=1 SV=3	Exocyst complex component 7 OS=Mus musculus GN=Exoc7 PE=1 SV=2	79.672	1.10905	0.600733	1.26561				1.11098	0.764876	1.19054	0.555995	0.057018	0.615131	0.120788	0.903865	0.195767
F1RW14	Uncharacterized protein	WDFY3	WD repeat and FYVE domain-containing protein 3 OS=Homo sapiens GN=WDFY3 PE=1 SV=2	WD repeat and FYVE domain-containing protein 3 OS=Mus musculus GN=Wdfy3 PE=2 SV=1	395.21	1.27076	0.564172	1.1512	1.21563	0.694596	1.07179				0.566249	0.0378128	0.506263	0.0382194	1.11849	0.127052
F1RW31	Uncharacterized protein	NUDT9	ADP-ribose pyrophosphatase, mitochondrial OS=Homo sapiens GN=NUDT9 PE=1 SV=1	ADP-ribose pyrophosphatase, mitochondrial OS=Mus musculus GN=Nudt9 PE=2 SV=1	38.978	0.873148	1.20171	0.930302	0.761069	1.10484	1.10726	0.942551	1.1452	0.982871	1.1428	0.0928475	1.33957	0.0159518	0.853113	0.118064
F1RW48	Uncharacterized protein	GPKOW	G patch domain and KOW motifs-containing protein OS=Homo sapiens GN=GPKOW PE=1 SV=2	G patch domain and KOW motifs-containing protein OS=Mus musculus GN=Gpkow PE=2 SV=2	53.085	0.996391	1.00927	0.994822	0.885322	1.18053	0.94585	0.970089	0.973501	1.05367	1.05643	0.487869	1.10923	0.24503	0.952398	0.358103
F1RW49	Uncharacterized protein	PKD2	Polycystin-2 OS=Homo sapiens GN=PKD2 PE=1 SV=3	Polycystin-2 OS=Mus musculus GN=Pkd2 PE=1 SV=2	109.62	0.941094	1.18483	0.884745	0.941287	1.13733	0.893058				1.3062	0.0491178	1.23363	0.0684955	1.05882	0.0503873
F1RW55	PRA1 family protein	PRAF2			19.286	0.910773	1.12979	1.00543	0.813709	1.19141	0.988944	0.951348	1.03264	1.01191	1.11561	0.126114	1.25338	0.0220615	0.890081	0.110548
F1RW61	Uncharacterized protein	PIGY	Protein preY, mitochondrial OS=Homo sapiens GN=PYURF PE=1 SV=1	Protein preY, mitochondrial OS=Mus musculus GN=Pyurf PE=3 SV=1	12.595	0.574	1.57428	0.864063	0.667115	1.56326	0.808232	0.663837	1.44324	0.86555	1.80499	0.00100495	2.40467	0.000125499	0.750618	0.00724834
F1RW68	Uncharacterized protein	GPRIN3	G protein-regulated inducer of neurite outgrowth 3 OS=Homo sapiens GN=GPRIN3 PE=2 SV=2	G protein-regulated inducer of neurite outgrowth 3 OS=Mus musculus GN=Gprin3 PE=1 SV=1	81.669	0.732671	1.47146	0.813056	0.9258	1.18144	0.907967	0.677635	1.59726	0.699663	1.75577	0.0225929	1.81933	0.0174228	0.96506	0.785076
F1RW74	Uncharacterized protein	SNRNP48	U11/U12 small nuclear ribonucleoprotein 48 kDa protein OS=Homo sapiens GN=SNRNP48 PE=1 SV=2	U11/U12 small nuclear ribonucleoprotein 48 kDa protein OS=Mus musculus GN=Snrnp48 PE=2 SV=2	33.944	1.07872	0.87601	1.04147	1.12964	0.890641	0.977688				0.874945	0.142745	0.799984	0.0557641	1.0937	0.15246
F1RW78	Uncharacterized protein	SSR1	Translocon-associated protein subunit alpha OS=Homo sapiens GN=SSR1 PE=1 SV=3	Translocon-associated protein subunit alpha OS=Mus musculus GN=Ssr1 PE=1 SV=1	31.906	0.931277	1.12656	0.948315	0.901474	1.07692	0.989091	0.970436	1.00841	1.00585	1.09127	0.103162	1.1458	0.0371068	0.952409	0.151982
F1RW79	Uncharacterized protein	RREB1	Ras-responsive element-binding protein 1 OS=Homo sapiens GN=RREB1 PE=1 SV=3	Ras-responsive element-binding protein 1 OS=Mus musculus GN=Rreb1 PE=1 SV=2	179.27	0.842147	1.31127	0.859525							1.52558		1.55706		0.979782
F1RW85	Uncharacterized protein	FAM171A1	Protein FAM171A1 OS=Homo sapiens GN=FAM171A1 PE=1 SV=1	Family with sequence similarity 171, member A1 OS=Mus musculus GN=Fam171a1 PE=2 SV=1	98.393
F1RW89	Electron transfer flavoprotein-ubiquinone oxidoreductase, mitochondrial	ETFDH			68.503	0.889512	1.12022	0.982244	0.929406	1.08813	0.984052	0.936843	1.03701	1.03037	1.08299	0.0545741	1.17766	0.00799251	0.919609	0.0205054
F1RW93	Uncharacterized protein	FAM198B	Protein FAM198B OS=Homo sapiens GN=FAM198B PE=2 SV=1	Protein FAM198B OS=Mus musculus GN=Fam198b PE=2 SV=1	57.972	1.29587	0.615496	1.08128	1.42364	0.361518	1.17497				0.433025	0.0934756	0.359261	0.0503355	1.20532	0.110284
F1RW98	Uncharacterized protein	LOC100626145	Ras suppressor protein 1 OS=Homo sapiens GN=RSU1 PE=1 SV=3	Ras suppressor protein 1 OS=Mus musculus GN=Rsu1 PE=4 SV=1	12.615	0.938717	1.00975	1.05409	0.918993	0.989073	1.08384	0.921238	1.0601	1.01204	0.971097	0.363834	1.10075	0.0384623	0.882214	0.0200925
F1RWA1	Uncharacterized protein	CACNB2	Voltage-dependent L-type calcium channel subunit beta-2 OS=Homo sapiens GN=CACNB2 PE=1 SV=3	Voltage-dependent L-type calcium channel subunit beta-2 OS=Mus musculus GN=Cacnb2 PE=2 SV=1	61.061	1.17831	0.796442	1.02322							0.778372		0.675919		1.15157
F1RWA6	Uncharacterized protein	---	Signal transducing adapter molecule 1 OS=Homo sapiens GN=STAM PE=1 SV=3	Signal transducing adapter molecule 1 OS=Mus musculus GN=Stam PE=2 SV=1	50.982	1.10765	0.80168	1.08303				1.04512	0.7738	1.18397	0.694962	0.0743459	0.731838	0.0372285	0.949612	0.454269
F1RWB0	Uncharacterized protein	GUCY1A3	Guanylate cyclase soluble subunit alpha-3 OS=Homo sapiens GN=GUCY1A3 PE=1 SV=2	Guanylate cyclase soluble subunit alpha-3 OS=Mus musculus GN=Gucy1a3 PE=2 SV=2	69.899							1.00499	0.894885	1.10007	0.813479		0.890441		0.913569
F1RWC5	Kinesin-like protein	KIF5B			109.25	1.16535	0.74342	1.09334	1.08943	0.800722	1.09983	1.09241	0.797469	1.11346	0.708155	0.00157158	0.699575	0.000617758	1.01226	0.64446
F1RWC6	Uncharacterized protein	ARHGAP12	Rho GTPase-activating protein 12 OS=Homo sapiens GN=ARHGAP12 PE=1 SV=1	Rho GTPase-activating protein 12 OS=Mus musculus GN=Arhgap12 PE=4 SV=1	96.358				1.16525	0.661591	1.14705	1.16329	0.616629	1.23259	0.537148	0.0189722	0.548937	0.026959	0.978524	0.657145
F1RWE1	Uncharacterized protein	KIAA1462	Junctional protein associated with coronary artery disease OS=Homo sapiens GN=KIAA1462 PE=1 SV=3	Junctional protein associated with coronary artery disease OS=Mus musculus GN=Jcad PE=1 SV=2	141.36	1.03363	0.987356	0.922355	0.927619	1.17149	0.915075	0.885522	1.06955	1.03522	1.12384	0.153156	1.13406	0.142048	0.990992	0.890521
F1RWE3	Uncharacterized protein	MTPAP	Poly(A) RNA polymerase, mitochondrial OS=Homo sapiens GN=MTPAP PE=1 SV=1	Poly(A) RNA polymerase, mitochondrial OS=Mus musculus GN=Mtpap PE=2 SV=1	65.089	0.873826	1.33151	0.812038				0.860991	1.17046	0.957172	1.41417	0.0786543	1.44221	0.12983	0.98056	0.851963
F1RWF7	Uncharacterized protein	CALCOCO2	Calcium-binding and coiled-coil domain-containing protein 2 OS=Homo sapiens GN=CALCOCO2 PE=1 SV=1	Calcium-binding and coiled-coil domain-containing protein 2 OS=Mus musculus GN=Calcoco2 PE=2 SV=1	52.239	0.810474	1.43267	0.788492							1.81698		1.7677		1.02788
F1RWH1	Uncharacterized protein	CBX1	Chromobox protein homolog 1 OS=Homo sapiens GN=CBX1 PE=1 SV=1	Chromobox protein homolog 1 OS=Mus musculus GN=Cbx1 PE=1 SV=1	21.418	0.754369	1.52088	0.747996	0.762147	1.46974	0.862457	0.901765	1.2409	0.848433	1.72091	0.0110653	1.7498	0.00768756	0.983486	0.833214
F1RWH4	Uncharacterized protein	COPZ2	Coatomer subunit zeta-2 OS=Homo sapiens GN=COPZ2 PE=2 SV=1	Coatomer subunit zeta-2 OS=Mus musculus GN=Copz2 PE=2 SV=1	22.734	1.13331	0.75011	1.10675	1.08341	0.904817	1.00753	0.952329	0.996083	1.04739	0.838483	0.127701	0.836531	0.132355	1.00233	0.970424
F1RWH6	Uncharacterized protein	CDK5RAP3	CDK5 regulatory subunit-associated protein 3 OS=Homo sapiens GN=CDK5RAP3 PE=1 SV=2	CDK5 regulatory subunit-associated protein 3 OS=Mus musculus GN=Cdk5rap3 PE=2 SV=1	49.441	1.01349	0.996958	1.00931	0.984205	1.02654	0.987602	1.02878	0.933553	1.06153	0.966845	0.392806	0.97706	0.504064	0.989546	0.702426
F1RWI5	Uncharacterized protein	---	60S ribosomal protein L7 OS=Homo sapiens GN=RPL7 PE=1 SV=1	60S ribosomal protein L7 (Fragment) OS=Mus musculus GN=Rpl7 PE=3 SV=1	26.503	1.28783	0.531382	1.12822	1.28545	0.681487	1.01784	1.35317	0.532299	1.14328	0.530553	0.00157175	0.444464	0.00137856	1.19369	0.0165343
F1RWI7	Uncharacterized protein	STAU2	Double-stranded RNA-binding protein Staufen homolog 2 OS=Homo sapiens GN=STAU2 PE=1 SV=1	Double-stranded RNA-binding protein Staufen homolog 2 OS=Mus musculus GN=Stau2 PE=2 SV=1	41.11				0.917528	1.23475	0.868541	0.894359	1.10436	0.992512	1.25687	0.11755	1.29098	0.145121	0.973581	0.759985
F1RWI8	Uncharacterized protein	SCRN2	Secernin-2 OS=Homo sapiens GN=SCRN2 PE=1 SV=3	Secernin-2 OS=Mus musculus GN=Scrn2 PE=2 SV=1	46.553	1.17927	0.75808	1.03867	1.23641	0.689339	1.10742	1.07132	0.82771	1.12405	0.695729	0.00383922	0.652459	0.00338071	1.06632	0.278221
F1RWJ0	Uncharacterized protein	MRPL10	39S ribosomal protein L10, mitochondrial OS=Homo sapiens GN=MRPL10 PE=1 SV=3	39S ribosomal protein L10, mitochondrial OS=Mus musculus GN=Mrpl10 PE=2 SV=2	29.409	0.849643	1.3162	0.848158	0.664056	1.45494	0.90655	0.926218	1.28297	0.785671	1.59587	0.00236195	1.66158	0.00677165	0.960454	0.722829
F1RWJ3	Uncharacterized protein	SP2	Transcription factor Sp2 OS=Homo sapiens GN=SP2 PE=1 SV=3	Transcription factor Sp2 OS=Mus musculus GN=Sp2 PE=2 SV=1	38.599
F1RWJ5	Uncharacterized protein	KPNB1	Importin subunit beta-1 OS=Homo sapiens GN=KPNB1 PE=1 SV=2	Importin subunit beta-1 OS=Mus musculus GN=Kpnb1 PE=1 SV=2	97.354	1.03756	0.974919	1.00186	1.02085	0.987391	1.01774	0.993828	1.01393	0.997287	0.986525	0.374343	0.975099	0.214722	1.01172	0.468605
F1RWJ6	Uncharacterized protein	NPEPPS	Puromycin-sensitive aminopeptidase OS=Homo sapiens GN=NPEPPS PE=1 SV=2	Puromycin-sensitive aminopeptidase OS=Mus musculus GN=Npepps PE=1 SV=2	103.92	0.927867	1.12426	0.902786	0.909259	1.15454	0.959658	0.877467	1.27103	0.854308	1.30665	0.00954013	1.30769	0.0170725	0.999205	0.984407
F1RWL1	Uncharacterized protein	FBXL20	F-box/LRR-repeat protein 20 OS=Homo sapiens GN=FBXL20 PE=1 SV=2	F-box/LRR-repeat protein 20 OS=Mus musculus GN=Fbxl20 PE=1 SV=3	48.423	1.14985	0.820089	1.05265	1.03136	0.876505	1.05514	1.09225	0.831632	1.10712	0.786407	0.000760516	0.772341	0.00781668	1.01821	0.647412
F1RWL2	Uncharacterized protein	MED1	Mediator of RNA polymerase II transcription subunit 1 OS=Homo sapiens GN=MED1 PE=1 SV=4	Mediator of RNA polymerase II transcription subunit 1 OS=Mus musculus GN=Med1 PE=1 SV=2	168.34	1.14376	0.805172	1.04682	1.09553	0.806352	1.05313	1.08909	0.933238	0.985164	0.824852	0.033011	0.764565	0.0150226	1.07885	0.0456253
F1RWL3	Uncharacterized protein	CDK12	Cyclin-dependent kinase 12 OS=Homo sapiens GN=CDK12 PE=1 SV=2	Cyclin-dependent kinase 12 OS=Mus musculus GN=Cdk12 PE=1 SV=2	164.55
F1RWL4	Uncharacterized protein	PGAP3	Post-GPI attachment to proteins factor 3 OS=Homo sapiens GN=PGAP3 PE=2 SV=2	Post-GPI attachment to proteins factor 3 OS=Mus musculus GN=Pgap3 PE=2 SV=1	36.341	0.886334	1.14791	0.968596							1.18513		1.29512		0.915071
F1RWL7	NADH dehydrogenase [ubiquinone] 1 beta subcomplex subunit 8, mitochondrial	NDUFB8			21.675	0.766119	1.28368	0.954286	0.916972	1.16979	0.96037	0.857267	0.963385	1.11549	1.12762	0.31305	1.34503	0.0710669	0.838363	0.078155
F1RWL8	Uncharacterized protein	SEC31B	Protein transport protein Sec31B OS=Homo sapiens GN=SEC31B PE=1 SV=1	Protein transport protein Sec31B OS=Mus musculus GN=Sec31b PE=2 SV=2	128.49
F1RWM7	Uncharacterized protein	FOXJ1	Forkhead box protein J1 OS=Homo sapiens GN=FOXJ1 PE=2 SV=3	Forkhead box protein J1 OS=Mus musculus GN=Foxj1 PE=2 SV=2	45.3	1.06818	0.924313	1.00691							0.917966		0.865318		1.06084
F1RWN0	1-acyl-sn-glycerol-3-phosphate acyltransferase	AGPAT2			24.512	0.673275	1.38654	0.897449	0.688111	1.42331	0.916764	0.683747	1.21629	1.03713	1.41202	0.00984302	1.96864	0.00894704	0.717254	0.0244685
F1RWP0	Uncharacterized protein	PRPSAP1	Phosphoribosyl pyrophosphate synthase-associated protein 1 OS=Homo sapiens GN=PRPSAP1 PE=1 SV=2	Phosphoribosyl pyrophosphate synthase-associated protein 1 OS=Mus musculus GN=Prpsap1 PE=1 SV=1	42.435	1.10741	0.834014	1.01808	1.13396	0.81661	1.01995	1.04975	0.969248	0.969823	0.871008	0.103319	0.796043	0.0259984	1.09417	0.0413598
F1RWP6	Uncharacterized protein	SPHK1	Sphingosine kinase 1 OS=Homo sapiens GN=SPHK1 PE=1 SV=1	Sphingosine kinase 1 OS=Mus musculus GN=Sphk1 PE=1 SV=1	51.106	1.13629	0.882278	0.983099							0.897446		0.776458		1.15582
F1RWS7	Uncharacterized protein	CTDP1	RNA polymerase II subunit A C-terminal domain phosphatase OS=Homo sapiens GN=CTDP1 PE=1 SV=3	RNA polymerase II subunit A C-terminal domain phosphatase OS=Mus musculus GN=Ctdp1 PE=1 SV=1	70.518	1.16984	0.693761	1.07358	1.1647	0.740737	1.06818	1.21191	0.717655	1.08768	0.666417	0.000297248	0.606847	2.27898e-05	1.09816	0.0110461
F1RWS8	Uncharacterized protein	SNRPA1	U2 small nuclear ribonucleoprotein A' OS=Homo sapiens GN=SNRPA1 PE=1 SV=2	U2 small nuclear ribonucleoprotein A' OS=Mus musculus GN=Snrpa1 PE=1 SV=2	28.385	0.958767	1.07117	0.932021	1.01587	1.06877	0.975705	0.914505	1.13176	0.882979	1.17236	0.010517	1.13241	0.0283428	1.03527	0.455587
F1RWT7	Uncharacterized protein	AMOT	Angiomotin OS=Homo sapiens GN=AMOT PE=1 SV=1	Angiomotin OS=Mus musculus GN=Amot PE=1 SV=3	115.67	1.15939	0.604759	1.2159							0.497374		0.52162		0.953518
F1RWV6	Uncharacterized protein (Fragment)	USP11	Ubiquitin carboxyl-terminal hydrolase 11 OS=Homo sapiens GN=USP11 PE=1 SV=3	Ubiquitin carboxyl-terminal hydrolase 11 OS=Mus musculus GN=Usp11 PE=2 SV=4	104.32	1.22724	0.734174	1.08434							0.677067		0.598233		1.13178
F1RWW3	Uncharacterized protein	SMARCAD1	SWI/SNF-related matrix-associated actin-dependent regulator of chromatin subfamily A containing DEAD/H box 1 OS=Homo sapiens GN=SMARCAD1 PE=1 SV=2	SWI/SNF-related matrix-associated actin-dependent regulator of chromatin subfamily A containing DEAD/H box 1 OS=Mus musculus GN=Smarcad1 PE=1 SV=2	117.66	1.14882	0.635952	1.19703	1.13734	0.844765	1.01109	1.07756	0.833877	1.09458	0.70082	0.020898	0.688107	0.0263962	1.01847	0.752294
F1RWW4	Uncharacterized protein	PDLIM5	PDZ and LIM domain protein 5 OS=Homo sapiens GN=PDLIM5 PE=1 SV=5	PDZ and LIM domain protein 5 OS=Mus musculus GN=Pdlim5 PE=1 SV=4	58.335	1.25587	0.431726	1.23581	1.24141	0.46383	1.2211	1.2237	0.561877	1.25994	0.392114	0.00139493	0.39168	0.00170666	1.00111	0.930042
F1RWX0	Uncharacterized protein	---	Phenylalanine--tRNA ligase, mitochondrial OS=Homo sapiens GN=FARS2 PE=1 SV=1	Phenylalanine--tRNA ligase, mitochondrial OS=Mus musculus GN=Fars2 PE=4 SV=1	11.229	0.945272	1.02131	1.03592	0.938118	1.12725	1.01274	0.935817	0.982583	1.05794	1.0079	0.870641	1.11065	0.137408	0.907488	0.014701
F1RWX5	Uncharacterized protein	WRNIP1	ATPase WRNIP1 OS=Homo sapiens GN=WRNIP1 PE=1 SV=2	ATPase WRNIP1 OS=Mus musculus GN=Wrnip1 PE=1 SV=2	55.877	1.06475	0.869788	1.07817	1.01915	0.915077	1.01653	1.02657	0.899185	1.09679	0.841002	0.00798422	0.862908	0.0018676	0.974614	0.402553
F1RWX6	Uncharacterized protein	RBM10	RNA-binding protein 10 OS=Homo sapiens GN=RBM10 PE=1 SV=3	RNA-binding protein 10 OS=Mus musculus GN=Rbm10 PE=1 SV=1	86.451	0.897684	1.16184	0.947669	1.0039	1.05887	0.962184	0.921609	1.08899	0.939053	1.16174	0.0323602	1.17232	0.0217839	0.990976	0.816931
F1RWX8	Uncharacterized protein	UBA1	Ubiquitin-like modifier-activating enzyme 1 OS=Homo sapiens GN=UBA1 PE=1 SV=3	Ubiquitin-like modifier-activating enzyme 1 OS=Mus musculus GN=Uba1 PE=1 SV=1	117.76	1.25526	0.524882	1.19452	1.23989	0.490834	1.19855	1.17936	0.639215	1.21199	0.459058	0.00429126	0.450382	0.000919839	1.01926	0.424281
F1RWY1	Uncharacterized protein	JADE3	Protein Jade-3 OS=Homo sapiens GN=JADE3 PE=1 SV=1	Protein Jade-3 OS=Mus musculus GN=Phf16 PE=2 SV=1	93.371	0.933792	1.05689	1.00848							1.048		1.13183		0.925935
F1RWY6	Uncharacterized protein	RIPK1	Receptor-interacting serine/threonine-protein kinase 1 OS=Homo sapiens GN=RIPK1 PE=1 SV=3	Receptor-interacting serine/threonine-protein kinase 1 OS=Mus musculus GN=Ripk1 PE=1 SV=1	74.422	1.15152	0.760001	1.08106	1.07584	0.755956	1.14574	1.16702	0.728896	1.04632	0.685847	0.00372233	0.661347	0.00250783	1.03705	0.37506
F1RWY7	Uncharacterized protein	BPHL	Valacyclovir hydrolase OS=Homo sapiens GN=BPHL PE=1 SV=1	Valacyclovir hydrolase OS=Mus musculus GN=Bphl PE=1 SV=1	33.227	0.925142	1.04397	1.02961	0.990943	1.0112	1.0245	0.925403	1.02137	1.01488	1.00246	0.828674	1.08272	0.0527379	0.925873	0.0690809
F1RWY9	Uncharacterized protein	PSMG4	Proteasome assembly chaperone 4 OS=Homo sapiens GN=PSMG4 PE=2 SV=2	Proteasome assembly chaperone 4 OS=Mus musculus GN=Psmg4 PE=1 SV=1	13.766	1.08514	0.704008	1.19298							0.590126		0.64877		0.909608
F1RWZ2	Uncharacterized protein	---	Serine/threonine-protein kinase PRP4 homolog OS=Homo sapiens GN=PRPF4B PE=1 SV=3	Serine/threonine-protein kinase PRP4 homolog OS=Mus musculus GN=Prpf4b PE=1 SV=3	45.496	1.02019	1.00091	0.982259	1.05329	1.04197	0.934547	1.07938	0.895094	1.0164	1.00163	0.976487	0.931842	0.238236	1.07489	0.0728637
F1RWZ4	Uncharacterized protein	ECI2	Enoyl-CoA delta isomerase 2, mitochondrial OS=Homo sapiens GN=ECI2 PE=1 SV=4	Enoyl-CoA delta isomerase 2, mitochondrial OS=Mus musculus GN=Eci2 PE=1 SV=2	43.63	0.920966	1.26563	0.831025	0.977159	1.18262	0.903627	0.921961	1.19616	0.890452	1.38829	0.000624739	1.2923	0.00147616	1.07428	0.0910619
F1RWZ9	Uncharacterized protein	FUNDC1	FUN14 domain-containing protein 1 OS=Homo sapiens GN=FUNDC1 PE=1 SV=1	FUN14 domain-containing protein 1 OS=Mus musculus GN=Fundc1 PE=2 SV=1	17.158	1.17402	0.854185	0.974306	1.04359	0.885716	1.06085	1.09958	0.742248	1.16569	0.775465	0.0295897	0.748272	0.0088922	1.03634	0.597653
F1RX00	Amine oxidase [flavin-containing]	MAOA			59.802	1.11781	0.67339	1.19573				1.11635	0.702508	1.18623	0.57763	0.00981192	0.615846	0.0212749	0.937946	0.0367012
F1RX06	Uncharacterized protein	LOC100155291	Chromodomain Y-like protein OS=Homo sapiens GN=CDYL PE=1 SV=2	Chromodomain Y-like protein OS=Mus musculus GN=Cdyl PE=1 SV=1	34.462	1.1513	0.780406	1.06259				1.06988	0.933817	1.00211	0.830253	0.231252	0.771762	0.136363	1.07579	0.272714
F1RX08	Uncharacterized protein	RPP40	Ribonuclease P protein subunit p40 OS=Homo sapiens GN=RPP40 PE=1 SV=3	Ribonuclease P protein subunit p40 OS=Mus musculus GN=Rpp40 PE=2 SV=2	41.39
F1RX12	Uncharacterized protein	GMDS	GDP-mannose 4,6 dehydratase OS=Homo sapiens GN=GMDS PE=1 SV=1	GDP-mannose 4,6 dehydratase OS=Mus musculus GN=Gmds PE=2 SV=1	39.927	1.33612	0.48981	1.12653	1.27248	0.583014	1.11811	1.26559	0.587503	1.14693	0.489546	0.00174149	0.428562	9.88746e-05	1.1423	0.0108683
F1RX15	Uncharacterized protein	CASK	Peripheral plasma membrane protein CASK OS=Homo sapiens GN=CASK PE=1 SV=3	Peripheral plasma membrane protein CASK OS=Mus musculus GN=Cask PE=1 SV=2	90.861	1.01289	0.894849	1.0512							0.851266		0.88346		0.963559
F1RX16	Uncharacterized protein	DDX3X	ATP-dependent RNA helicase DDX3X OS=Homo sapiens GN=DDX3X PE=1 SV=3	ATP-dependent RNA helicase DDX3X OS=Mus musculus GN=Ddx3x PE=1 SV=3	73.153	0.955672	1.0141	0.989035	1.01024	1.0517	0.953735	0.98489	0.971014	1.05153	1.0142	0.721188	1.02915	0.373229	0.985471	0.686027
F1RX17	Uncharacterized protein (Fragment)	USP9X	Probable ubiquitin carboxyl-terminal hydrolase FAF-X OS=Homo sapiens GN=USP9X PE=1 SV=3	Ubiquitin carboxyl-terminal hydrolase OS=Mus musculus GN=Usp9x PE=2 SV=1	205.13	1.13801	0.699341	1.13937	1.1542	0.652167	1.12788	1.08068	0.77538	1.12394	0.62718	0.00646985	0.630582	0.00139723	0.994604	0.812191
F1RX35	Uncharacterized protein	LOC100627396	Fibrinogen gamma chain OS=Homo sapiens GN=FGG PE=1 SV=3	Fibrinogen gamma chain OS=Mus musculus GN=Fgg PE=2 SV=1	49.618	1.79678	0.568607	0.663235	1.15777	0.870928	0.972276	1.17916	0.993548	0.830886	0.986493	0.946573	0.588594	0.0957676	1.67601	0.101863
F1RX38	Uncharacterized protein	PLRG1	Pleiotropic regulator 1 OS=Homo sapiens GN=PLRG1 PE=1 SV=1	Pleiotropic regulator 1 OS=Mus musculus GN=Plrg1 PE=2 SV=1	56.792	0.856675	1.3411	0.800278							1.67579		1.56547		1.07047
F1RX42	Uncharacterized protein	ZMYND11	Zinc finger MYND domain-containing protein 11 OS=Homo sapiens GN=ZMYND11 PE=1 SV=2	Zinc finger MYND domain-containing protein 11 OS=Mus musculus GN=Zmynd11 PE=2 SV=2	70.959	1.39376	0.495565	1.10151	1.12976	0.853757	0.975359	1.14074	0.836251	1.03457	0.702431	0.107203	0.596456	0.0310213	1.17767	0.154063
F1RX46	Uncharacterized protein	LARP4B	La-related protein 4B OS=Homo sapiens GN=LARP4B PE=1 SV=3	La-related protein 4B OS=Mus musculus GN=Larp4b PE=1 SV=2	79.982
F1RX50	Uncharacterized protein	PITRM1	Presequence protease, mitochondrial OS=Homo sapiens GN=PITRM1 PE=1 SV=3	Presequence protease, mitochondrial OS=Mus musculus GN=Pitrm1 PE=1 SV=1	87.249	0.993665	1.14762	0.885249	0.934539	1.21252	0.872561	0.899231	1.20056	0.896747	1.34135	0.00189774	1.25934	0.00281186	1.06512	0.165123
F1RX51	Malignant T-cell-amplified sequence	LOC100738684			20.546	1.15061	0.856097	0.979489	1.07544	0.890623	0.974893	1.06264	0.924968	1.05239	0.888557	0.0273298	0.812387	0.00499844	1.09376	0.0653721
F1RX57	Uncharacterized protein	---	E3 ubiquitin-protein ligase HERC2 OS=Homo sapiens GN=HERC2 PE=1 SV=2	E3 ubiquitin-protein ligase HERC2 OS=Mus musculus GN=Herc2 PE=1 SV=3	197.18				1.02487	1.0104	0.968049				1.04374		0.985874		1.0587
F1RX61	Uncharacterized protein	SARAF	Store-operated calcium entry-associated regulatory factor OS=Homo sapiens GN=TMEM66 PE=1 SV=1	Store-operated calcium entry-associated regulatory factor OS=Mus musculus GN=Tmem66 PE=2 SV=2	36.785	1.0364	0.879817	1.07668	1.04255	0.952628	1.0028				0.881203	0.140196	0.881428	0.180664	0.999745	0.995432
F1RX65	Uncharacterized protein	GTF2E2	Transcription initiation factor IIE subunit beta OS=Homo sapiens GN=GTF2E2 PE=1 SV=1	General transcription factor IIE subunit 2 OS=Mus musculus GN=Gtf2e2 PE=2 SV=2	24.118	1.18995	0.864195	0.988336	1.15655	0.972882	0.885578	1.14154	0.876168	0.974949	0.952396	0.392282	0.777871	0.00886913	1.22436	0.0115444
F1RX66	Uncharacterized protein	GSR	Glutathione reductase, mitochondrial OS=Homo sapiens GN=GSR PE=1 SV=2	Glutathione reductase, mitochondrial OS=Mus musculus GN=Gsr PE=1 SV=3	53.338	0.880607	1.13063	0.989644	0.889953	1.15243	0.979562	0.821068	1.27331	0.891226	1.2433	0.0162288	1.37225	0.00817655	0.906027	0.0859481
F1RX70	Uncharacterized protein	WRN	Werner syndrome ATP-dependent helicase OS=Homo sapiens GN=WRN PE=1 SV=2	Werner syndrome ATP-dependent helicase homolog OS=Mus musculus GN=Wrn PE=1 SV=3	158.93	0.938106	1.18685	0.88563	0.941975	1.20819	0.869566				1.36454	0.00249716	1.2739	0.0220726	1.07115	0.0679714
F1RX74	Uncharacterized protein	HNRNPA2B1	Heterogeneous nuclear ribonucleoproteins A2/B1 OS=Homo sapiens GN=HNRNPA2B1 PE=1 SV=2	Heterogeneous nuclear ribonucleoproteins A2/B1 OS=Mus musculus GN=Hnrnpa2b1 PE=1 SV=2	37.519	0.976887	1.01481	1.00989	1.01119	1.00059	0.990994	1.02944	0.923842	1.03958	0.966706	0.365182	0.974058	0.475162	0.992453	0.733168
F1RX83	Uncharacterized protein	ERLIN2	Erlin-2 OS=Homo sapiens GN=ERLIN2 PE=1 SV=1	Erlin-2 OS=Mus musculus GN=Erlin2 PE=1 SV=1	37.817	0.92541	1.06864	1.02816	0.923422	1.0457	1.03632	0.984752	0.925617	1.08783	0.964357	0.499092	1.07283	0.259052	0.89889	0.0181812
F1RX84	Uncharacterized protein	PROSC	Proline synthase co-transcribed bacterial homolog protein OS=Homo sapiens GN=PROSC PE=1 SV=1	Proline synthase co-transcribed bacterial homolog protein OS=Mus musculus GN=Prosc PE=1 SV=1	30.451	1.11073	0.738495	1.09337	1.0766	0.696401	1.15712	1.0892	0.806344	1.11136	0.66667	0.00148527	0.684028	0.00497126	0.974624	0.27585
F1RX98	Uncharacterized protein	LOC100153122	Protein misato homolog 1 OS=Homo sapiens GN=MSTO1 PE=1 SV=1	Protein misato homolog 1 OS=Mus musculus GN=Msto1 PE=2 SV=1	52.196	1.10049	0.843966	1.05088	0.966666	0.927693	1.0943	0.964984	0.874881	1.15648	0.801578	0.00586016	0.872829	0.0841365	0.918368	0.18307
F1RX99	Uncharacterized protein	TPD52	Tumor protein D52 OS=Homo sapiens GN=TPD52 PE=1 SV=2	Tumor protein D52 (Fragment) OS=Mus musculus GN=Tpd52 PE=2 SV=1	19.93	0.832157	1.50329	0.692963				1.04471	0.98263	0.976494	1.48906	0.334326	1.32451	0.437386	1.12424	0.621617
F1RXA7	Uncharacterized protein	PSMD3	26S proteasome non-ATPase regulatory subunit 3 OS=Homo sapiens GN=PSMD3 PE=1 SV=2	26S proteasome non-ATPase regulatory subunit 3 OS=Mus musculus GN=Psmd3 PE=1 SV=3	61.178	1.22668	0.646928	1.1231	1.19314	0.661177	1.11341	1.1543	0.755379	1.12495	0.613865	0.00569839	0.57734	0.000640076	1.06326	0.0731591
F1RXA9	Uncharacterized protein	LOC100511100	Mediator of RNA polymerase II transcription subunit 24 OS=Homo sapiens GN=MED24 PE=1 SV=1	Mediator of RNA polymerase II transcription subunit 24 OS=Mus musculus GN=Med24 PE=1 SV=1	110.28	1.26557	0.638662	1.08779	1.16935	0.838202	0.987554	1.12488	0.818964	1.06625	0.730785	0.0303349	0.644932	0.00792013	1.13312	0.0589336
F1RXB4	Uncharacterized protein	RALYL	RNA-binding Raly-like protein OS=Homo sapiens GN=RALYL PE=2 SV=2	RNA-binding Raly-like protein OS=Mus musculus GN=Ralyl PE=2 SV=1	23.631	1.0186	0.734134	1.22626							0.598679		0.720728		0.830659
F1RXC2	Uncharacterized protein	CA2	Carbonic anhydrase 2 OS=Homo sapiens GN=CA2 PE=1 SV=2	Carbonic anhydrase 2 OS=Mus musculus GN=Ca2 PE=1 SV=4	29.46				1.03114	0.547508	1.3705				0.399496		0.530975		0.752383
F1RXC5	Uncharacterized protein	WIPF2	WAS/WASL-interacting protein family member 2 OS=Homo sapiens GN=WIPF2 PE=1 SV=1	WAS/WASL-interacting protein family member 2 OS=Mus musculus GN=Wipf2 PE=2 SV=1	46.34
F1RXC7	Uncharacterized protein	CASC3	Protein CASC3 OS=Homo sapiens GN=CASC3 PE=1 SV=2	Protein CASC3 OS=Mus musculus GN=Casc3 PE=1 SV=3	66.68	0.525442	1.85878	0.648149	0.576202	1.91702	0.579557	0.562349	1.78372	0.619254	3.01009	9.65016e-05	3.34107	0.000199396	0.900936	0.0756868
F1RXC8	Uncharacterized protein	MSL1	Male-specific lethal 1 homolog OS=Homo sapiens GN=MSL1 PE=1 SV=3	Male-specific lethal 1 homolog OS=Mus musculus GN=Msl1 PE=1 SV=1	67.136	0.979812	1.11811	0.910388	1.00662	1.15075	0.860999	0.910563	1.02723	1.0545	1.16639	0.0969167	1.13776	0.0500079	1.02516	0.739128
F1RXD4	Uncharacterized protein	RMDN1	Regulator of microtubule dynamics protein 1 OS=Homo sapiens GN=RMDN1 PE=1 SV=1	Regulator of microtubule dynamics protein 1 OS=Mus musculus GN=Rmdn1 PE=2 SV=2	36.074	0.884802	1.28605	0.843605	0.741051	1.53358	0.729108	0.786756	1.39769	0.79873	1.77838	0.00540782	1.74803	0.0041483	1.01736	0.812345
F1RXD5	Uncharacterized protein	CPNE3	Copine-3 OS=Homo sapiens GN=CPNE3 PE=1 SV=1	Copine-3 OS=Mus musculus GN=Cpne3 PE=2 SV=2	59.643	0.990701	1.03158	0.961987	0.972225	1.0297	0.963514	0.981576	1.03277	0.972309	1.06772	0.00128939	1.05079	0.00969967	1.01611	0.0804921
F1RXF3	Uncharacterized protein	DECR1	2,4-dienoyl-CoA reductase, mitochondrial OS=Homo sapiens GN=DECR1 PE=1 SV=1	2,4-dienoyl-CoA reductase, mitochondrial OS=Mus musculus GN=Decr1 PE=1 SV=1	35.43	0.950494	0.990616	1.064	1.00599	0.99055	1.06178	0.999336	0.932883	1.06839	0.912304	0.0387101	0.985869	0.620942	0.92538	0.0437139
F1RXF7	Uncharacterized protein	OTUD6B	OTU domain-containing protein 6B OS=Homo sapiens GN=OTUD6B PE=1 SV=1	OTU domain-containing protein 6B OS=Mus musculus GN=Otud6b PE=2 SV=1	33.519	1.06741	0.868777	1.05843							0.82082		0.813908		1.00849
F1RXI6	Uncharacterized protein	PSMD10	26S proteasome non-ATPase regulatory subunit 10 OS=Homo sapiens GN=PSMD10 PE=1 SV=1	26S proteasome non-ATPase regulatory subunit 10 OS=Mus musculus GN=Psmd10 PE=1 SV=3	24.527	0.999409	0.753378	1.18301	1.05859	0.736264	1.1789	1.08778	0.744482	1.15062	0.636043	5.51601e-05	0.710198	0.00580019	0.895585	0.0294631
F1RXK4	Uncharacterized protein	FRMPD3	FERM and PDZ domain-containing protein 3 OS=Homo sapiens GN=FRMPD3 PE=2 SV=2	FERM and PDZ domain-containing protein 4 OS=Mus musculus GN=Frmpd4 PE=2 SV=1	139.33	1.22585	0.650742	1.11306							0.584644		0.53085		1.10133
F1RXM4	Uncharacterized protein	MUM1L1	PWWP domain-containing protein MUM1L1 OS=Homo sapiens GN=MUM1L1 PE=2 SV=1	PWWP domain-containing protein MUM1L1 OS=Mus musculus GN=Mum1l1 PE=2 SV=2	78.868	0.890248	0.932164	1.12615	0.945473	1.11668	0.947053	1.09579	0.847947	1.06394	0.923387	0.453903	0.988156	0.914071	0.934454	0.44511
F1RXP8	Uncharacterized protein	EXOC2	Exocyst complex component 2 OS=Homo sapiens GN=EXOC2 PE=1 SV=1	Exocyst complex component 2 OS=Mus musculus GN=Exoc2 PE=1 SV=1	102.98	1.089	0.797517	1.10389	1.06561	0.894859	1.03262	1.07025	0.863288	1.07198	0.796533	0.00480863	0.79249	0.0122115	1.0051	0.821802
F1RXR2	Uncharacterized protein	CRELD2	Cysteine-rich with EGF-like domain protein 2 OS=Homo sapiens GN=CRELD2 PE=1 SV=1	Cysteine-rich with EGF-like domain protein 2 OS=Mus musculus GN=Creld2 PE=2 SV=1	38.405	0.57914	1.65991	0.805574	0.615477	1.39021	0.899769	0.628838	1.60875	0.732747	1.91087	0.00347768	2.55497	0.00622713	0.747903	0.0415896
F1RXR3	Mannosyltransferase	ALG12			43.151	0.863012	1.15428	0.98409	0.89637	1.23804	0.88502	0.98602	1.06347	0.949578	1.22603	0.0319211	1.25876	0.0225561	0.974	0.630772
F1RXR9	Uncharacterized protein	TRABD	TraB domain-containing protein OS=Homo sapiens GN=TRABD PE=1 SV=1	TraB domain-containing protein OS=Mus musculus GN=Trabd PE=2 SV=1	42.28	0.799968	1.39731	0.819368	0.860905	1.28957	0.87206	1.02985	0.942848	1.02965	1.33393	0.144535	1.34898	0.135624	0.988848	0.918983
F1RXS0	Uncharacterized protein	SELO	Selenoprotein O OS=Homo sapiens GN=SELO PE=2 SV=3	Selenoprotein O OS=Mus musculus GN=Selo PE=2 SV=4	73.362	1.11036	0.731176	1.14506	1.13633	0.76524	1.08214	1.2045	0.740157	1.04958	0.682551	0.00296393	0.648059	0.00202932	1.05322	0.216619
F1RXS1	Uncharacterized protein	TUBGCP6	Gamma-tubulin complex component 6 OS=Homo sapiens GN=TUBGCP6 PE=1 SV=3	MCG6795 OS=Mus musculus GN=Tubgcp6 PE=4 SV=1	192.05	1.07828	0.937337	0.985761				0.948341	1.09914	0.94846	1.05286	0.640439	1.00486	0.966621	1.04777	0.604768
F1RXS6	Cytochrome b-245 heavy chain	CYBB			53.798	1.54523	0.235163	1.20128	1.35049	0.286233	1.30837	1.83228	0.246956	0.990142	0.219542	0.00894212	0.162511	0.0103501	1.35094	0.0811134
F1RXT3	Uncharacterized protein	PPP6R2	Serine/threonine-protein phosphatase 6 regulatory subunit 2 OS=Homo sapiens GN=PPP6R2 PE=1 SV=2	Serine/threonine-protein phosphatase 6 regulatory subunit 2 OS=Mus musculus GN=Ppp6r2 PE=1 SV=1	100.45	1.14935	0.660509	1.17407	1.18759	0.659016	1.12885	1.07828	0.831167	1.09663	0.632641	0.0101283	0.629738	0.00658895	1.00461	0.900926
F1RXT5	Uncharacterized protein	SBF1	Myotubularin-related protein 5 OS=Homo sapiens GN=SBF1 PE=1 SV=3	Myotubularin-related protein 5 OS=Mus musculus GN=Sbf1 PE=1 SV=2	208.74	1.13639	0.815455	1.04415	1.05679	0.876649	1.05827				0.804838	0.0810089	0.771531	0.0430668	1.04317	0.454501
F1RXT7	Uncharacterized protein	SCO2	Protein SCO2 homolog, mitochondrial OS=Homo sapiens GN=SCO2 PE=1 SV=3	Protein SCO2 homolog, mitochondrial OS=Mus musculus GN=Sco2 PE=2 SV=1	29.593	0.965916	0.984083	1.04573				1.20464	0.870066	0.942609	0.932513	0.47557	0.854227	0.392852	1.09165	0.583768
F1RXT8	Uncharacterized protein	NCAPH2	Condensin-2 complex subunit H2 OS=Homo sapiens GN=NCAPH2 PE=1 SV=1	Condensin-2 complex subunit H2 OS=Mus musculus GN=Ncaph2 PE=1 SV=1	68.227	1.06786	0.737743	1.17791				0.998438	1.09013	0.911718	0.874734	0.617357	0.884613	0.620324	0.988833	0.944841
F1RXT9	Lipase maturation factor	LMF2			79.353	0.884934	1.26304	0.916386	0.812691	1.23003	0.994443	0.83338	1.0949	1.07641	1.2011	0.0448965	1.41761	0.0111556	0.847272	0.0629263
F1RXV9	Uncharacterized protein	WDR75	WD repeat-containing protein 75 OS=Homo sapiens GN=WDR75 PE=1 SV=1	Protein Wdr75 OS=Mus musculus GN=Wdr75 PE=2 SV=1	94.863	1.08415	0.91289	1.00277	1.03002	0.946208	1.01993	1.03896	1.029	0.935589	0.976273	0.617917	0.915946	0.108003	1.06586	0.113198
F1RXW5	Uncharacterized protein	TMEM177	Transmembrane protein 177 OS=Homo sapiens GN=TMEM177 PE=2 SV=1	Transmembrane protein 177 OS=Mus musculus GN=Tmem177 PE=2 SV=1	33.809				0.90644	1.22193	0.889997				1.37296		1.34806		1.01848
F1RXX0	Uncharacterized protein	LOC100521932	Coiled-coil domain-containing protein 115 OS=Homo sapiens GN=CCDC115 PE=1 SV=1	Coiled-coil domain-containing protein 115 OS=Mus musculus GN=Ccdc115 PE=2 SV=1	19.825	0.780524	1.41945	0.816894	0.939944	1.10975	0.958232	1.03697	1.12102	0.88389	1.37277	0.066969	1.32377	0.0831705	1.03702	0.725053
F1RXX3	Uncharacterized protein	---	U3 small nucleolar ribonucleoprotein protein IMP4 OS=Homo sapiens GN=IMP4 PE=1 SV=1	U3 small nucleolar ribonucleoprotein protein IMP4 OS=Mus musculus GN=Imp4 PE=2 SV=1	29.017				1.04667	0.988506	0.967384				1.02183		0.944428		1.08196
F1RXX7	Uncharacterized protein	NIFK	MKI67 FHA domain-interacting nucleolar phosphoprotein OS=Homo sapiens GN=NIFK PE=1 SV=1	MKI67 FHA domain-interacting nucleolar phosphoprotein OS=Mus musculus GN=Nifk PE=1 SV=1	34.057	1.04461	0.892978	1.02937	1.08947	1.04298	0.850298	1.02488	1.13242	0.878898	1.11231	0.314613	0.971324	0.712491	1.14515	0.126662
F1RXY4	Uncharacterized protein	COQ3	Hexaprenyldihydroxybenzoate methyltransferase, mitochondrial OS=Homo sapiens GN=COQ3 PE=1 SV=3	Hexaprenyldihydroxybenzoate methyltransferase, mitochondrial OS=Mus musculus GN=Coq3 PE=1 SV=1	24.25	0.848444	1.15447	0.997238	0.936967	0.872649	1.17004	0.811725	1.38596	0.872178	1.12292	0.517498	1.31417	0.203254	0.854474	0.224056
F1RXY7	Uncharacterized protein	TSN	Translin OS=Homo sapiens GN=TSN PE=1 SV=1	Translin OS=Mus musculus GN=Tsn PE=1 SV=1	19.868	0.992587	1.04792	0.962932	1.0107	0.90914	1.07032	0.903567	1.27266	0.816597	1.1333	0.387925	1.11107	0.419861	1.02001	0.829979
F1RXZ5	Uncharacterized protein	ERCC3	TFIIH basal transcription factor complex helicase XPB subunit OS=Homo sapiens GN=ERCC3 PE=1 SV=1	TFIIH basal transcription factor complex helicase XPB subunit OS=Mus musculus GN=Ercc3 PE=2 SV=1	89.126	1.08962	0.874432	1.02255							0.855149		0.802512		1.06559
F1RY01	Uncharacterized protein	NDUFAF4	NADH dehydrogenase [ubiquinone] 1 alpha subcomplex assembly factor 4 OS=Homo sapiens GN=NDUFAF4 PE=1 SV=1	NADH dehydrogenase [ubiquinone] 1 alpha subcomplex assembly factor 4 OS=Mus musculus GN=Ndufaf4 PE=2 SV=1	19.939	0.861081	1.1483	0.901284	0.933338	1.22585	0.861899	0.96497	1.08101	0.951331	1.27285	0.0117794	1.25215	0.0134719	1.01653	0.729121
F1RY04	Uncharacterized protein	UFL1	E3 UFM1-protein ligase 1 OS=Homo sapiens GN=UFL1 PE=1 SV=2	E3 UFM1-protein ligase 1 OS=Mus musculus GN=Ufl1 PE=1 SV=2	89.448	0.982907	1.00157	1.00484	0.94431	1.04809	0.974006	0.990513	0.918962	1.05196	0.979479	0.667401	1.01744	0.707086	0.962688	0.244687
F1RY06	Uncharacterized protein	MANEA	Glycoprotein endo-alpha-1,2-mannosidase OS=Homo sapiens GN=MANEA PE=1 SV=1	Glycoprotein endo-alpha-1,2-mannosidase OS=Mus musculus GN=Manea PE=2 SV=1	53.788	1.02712	0.766728	1.18865	1.01711	0.806698	1.15479	1.18796	0.475037	1.35102	0.554471	0.0172922	0.633771	0.0436637	0.874875	0.13416
F1RY07	Uncharacterized protein	C2orf76	UPF0538 protein C2orf76 OS=Homo sapiens GN=C2orf76 PE=1 SV=3	UPF0538 protein C2orf76 homolog OS=Mus musculus PE=2 SV=2	16.101	1.36299	0.555989	1.07436	1.25924	0.494832	1.208	1.12612	0.667585	1.21579	0.491233	0.00100808	0.458443	0.00191417	1.07153	0.376872
F1RY11	Uncharacterized protein	CCDC93	Coiled-coil domain-containing protein 93 OS=Homo sapiens GN=CCDC93 PE=1 SV=2	Coiled-coil domain-containing protein 93 OS=Mus musculus GN=Ccdc93 PE=2 SV=1	57.952	1.31047	0.461455	1.23501	1.2077	0.56197	1.19829	1.1581	0.662913	1.19173	0.465192	0.0058442	0.458708	0.00110717	1.01414	0.745575
F1RY21	Uncharacterized protein	---	Midasin OS=Homo sapiens GN=MDN1 PE=1 SV=2	Midasin OS=Mus musculus GN=Mdn1 PE=2 SV=1	132.85	1.17191	0.742958	1.06198	1.13425	0.867226	1.00463	1.12904	0.801662	1.05016	0.77383	0.0107699	0.702099	0.00547203	1.10217	0.0100467
F1RY22	Uncharacterized protein	---	Midasin OS=Homo sapiens GN=MDN1 PE=1 SV=2	Midasin OS=Mus musculus GN=Mdn1 PE=2 SV=1	321.06	1.08124	0.86489	1.00421	1.10837	0.881566	0.992343	1.04651	0.839951	1.063	0.845355	0.00712033	0.799232	0.00104777	1.05771	0.108229
F1RY40	Uncharacterized protein	RBM12B	RNA-binding protein 12B OS=Homo sapiens GN=RBM12B PE=1 SV=2	RNA-binding protein 12B-A OS=Mus musculus GN=Rbm12b1 PE=2 SV=2	116.47	1.04092	0.910962	1.08234	1.06155	0.874396	1.02952	1.03331	0.836669	1.14958	0.803948	0.0104743	0.836164	0.00804846	0.961471	0.351051
F1RY42	Uncharacterized protein	TMEM67	Meckelin OS=Homo sapiens GN=TMEM67 PE=1 SV=2	Meckelin OS=Mus musculus GN=Tmem67 PE=2 SV=1	88.679							1.00698	0.832095	1.16075	0.716857		0.826328		0.86752
F1RY43	Uncharacterized protein	PDP1	[Pyruvate dehydrogenase [acetyl-transferring]]-phosphatase 1, mitochondrial OS=Homo sapiens GN=PDP1 PE=1 SV=3	[Pyruvate dehydrogenase [acetyl-transferring]]-phosphatase 1, mitochondrial OS=Mus musculus GN=Pdp1 PE=2 SV=1	60.997	1.09392	0.845601	1.00452	1.07912	0.839757	1.06883	1.08555	0.784861	1.13607	0.769678	0.010559	0.758061	0.00387832	1.01532	0.708837
F1RY51	Uncharacterized protein	KIAA1429	Protein virilizer homolog OS=Homo sapiens GN=KIAA1429 PE=1 SV=2	Protein virilizer homolog OS=Mus musculus GN=Kiaa1429 PE=1 SV=1	195.77				0.934279	1.08325	0.986793	1.05876	0.877735	1.06808	0.954309	0.730372	0.983913	0.908315	0.969913	0.723534
F1RY55	Uncharacterized protein	INTS8	Integrator complex subunit 8 OS=Homo sapiens GN=INTS8 PE=1 SV=1	Integrator complex subunit 8 OS=Mus musculus GN=Ints8 PE=2 SV=1	113.3	1.10756	0.75962	1.12159	1.26461	0.679647	1.04011	1.1507	0.765764	1.09564	0.676943	0.000737546	0.625918	0.0029536	1.08152	0.191784
F1RY59	Uncharacterized protein	C8orf37	Protein C8orf37 OS=Homo sapiens GN=C8orf37 PE=1 SV=1	Protein C8orf37 homolog OS=Mus musculus PE=1 SV=1	23.554	1.12593	0.705995	1.15386	1.0774	0.787825	1.1162				0.658052	0.0347171	0.677982	0.0300751	0.970604	0.396732
F1RY63	Uncharacterized protein	PPP6R3	Serine/threonine-protein phosphatase 6 regulatory subunit 3 OS=Homo sapiens GN=PPP6R3 PE=1 SV=2	SAPS domain family, member 3, isoform CRA_c OS=Mus musculus GN=Ppp6r3 PE=4 SV=1	78.545	1.13647	0.764288	1.07926	1.11006	0.824856	1.05363	1.13247	0.815236	1.0322	0.759657	0.000646261	0.711565	0.00089788	1.06759	0.0169427
F1RY67	Uncharacterized protein	---	Carnitine O-palmitoyltransferase 1, liver isoform OS=Homo sapiens GN=CPT1A PE=1 SV=2	Carnitine O-palmitoyltransferase 1, liver isoform OS=Mus musculus GN=Cpt1a PE=1 SV=4	35.756	0.96501	1.16503	0.843711	0.973281	1.10892	0.902932	1.02282	1.01887	0.98044	1.20745	0.0317961	1.11202	0.106337	1.08582	0.177497
F1RY70	Uncharacterized protein	MRPL21	39S ribosomal protein L21, mitochondrial OS=Homo sapiens GN=MRPL21 PE=1 SV=2	39S ribosomal protein L21, mitochondrial OS=Mus musculus GN=Mrpl21 PE=2 SV=1	23.122	0.930564	1.23898	0.84483	0.907857	1.25163	0.862509				1.45877	0.00134501	1.35475	0.00499371	1.07678	0.0501027
F1RY71	Uncharacterized protein	IGHMBP2	DNA-binding protein SMUBP-2 OS=Homo sapiens GN=IGHMBP2 PE=1 SV=3	DNA-binding protein SMUBP-2 OS=Mus musculus GN=Ighmbp2 PE=1 SV=1	107.3
F1RY93	Uncharacterized protein	STK38	Serine/threonine-protein kinase 38 OS=Homo sapiens GN=STK38 PE=1 SV=1	Serine/threonine-protein kinase 38 OS=Mus musculus GN=Stk38 PE=1 SV=1	53.188	1.06354	0.746732	1.17364				1.11834	0.594822	1.29531	0.543371	0.0317222	0.614861	0.0843333	0.88373	0.21746
F1RYA1	Mitogen-activated protein kinase	MAPK14			41.282	1.18287	0.650476	1.14491	1.09386	0.718588	1.14898	1.11882	0.712703	1.14665	0.605069	0.00224952	0.613088	0.000269595	0.98692	0.628631
F1RYA3	Uncharacterized protein	CARS	Cysteine--tRNA ligase, cytoplasmic OS=Homo sapiens GN=CARS PE=1 SV=3	Cysteine--tRNA ligase, cytoplasmic OS=Mus musculus GN=Cars PE=2 SV=2	93.918	1.15353	0.75857	1.05962	1.14557	0.769377	1.08921	1.10532	0.840029	1.05819	0.738373	0.0035828	0.69556	0.00095595	1.06155	0.0271537
F1RYA4	Uncharacterized protein	NAP1L4	Nucleosome assembly protein 1-like 4 OS=Homo sapiens GN=NAP1L4 PE=1 SV=1	Nucleosome assembly protein 1-like 4 OS=Mus musculus GN=Nap1l4 PE=1 SV=1	43.744	1.03964	1.00832	0.970155	0.950712	1.12949	0.975826	0.962483	1.04931	0.96489	1.0949	0.121389	1.07934	0.163266	1.01442	0.666525
F1RYE7	Uncharacterized protein	GPRASP2	G-protein coupled receptor-associated sorting protein 2 OS=Homo sapiens GN=GPRASP2 PE=1 SV=1	G-protein coupled receptor-associated sorting protein 2 OS=Mus musculus GN=Gprasp2 PE=2 SV=2	95.85	0.708677	1.49594	0.849578	0.668597	1.64067	0.739237	0.821407	1.14802	0.735903	1.84308	0.0395351	1.94873	0.0321409	0.945784	0.517588
F1RYG9	Uncharacterized protein	ARMCX3	Armadillo repeat-containing X-linked protein 3 OS=Homo sapiens GN=ARMCX3 PE=1 SV=1	Armadillo repeat-containing X-linked protein 3 OS=Mus musculus GN=Armcx3 PE=1 SV=1	40.535	1.03445	0.925429	1.0329	1.08574	0.919637	0.975322	1.09771	0.888174	1.02215	0.901951	0.0133542	0.849386	0.00423563	1.06188	0.0764094
F1RYI1	Uncharacterized protein	LARGE1	Glycosyltransferase-like protein LARGE1 OS=Homo sapiens GN=LARGE PE=1 SV=1	Glycosyltransferase-like protein LARGE1 OS=Mus musculus GN=Large PE=1 SV=1	54.471	1.03978	0.703237	1.23516							0.569349		0.676333		0.841817
F1RYJ4	Uncharacterized protein	ITGAV	Integrin alpha-V OS=Homo sapiens GN=ITGAV PE=1 SV=2	Integrin alpha-V OS=Mus musculus GN=Itgav PE=1 SV=2	104.48	0.954028	0.967159	1.05992	0.924919	0.955382	1.09559	1.03827	0.892925	1.07921	0.87039	0.0142784	0.96512	0.461083	0.901847	0.0788181
F1RYJ5	Uncharacterized protein	ZC3H15	Zinc finger CCCH domain-containing protein 15 OS=Homo sapiens GN=ZC3H15 PE=1 SV=1	Zinc finger CCCH domain-containing protein 15 OS=Mus musculus GN=Zc3h15 PE=1 SV=2	48.545	0.943413	1.20117	0.867673	0.905962	1.35352	0.774394				1.55578	0.0526592	1.38138	0.119035	1.12625	0.237552
F1RYJ7	Uncharacterized protein	---	Palmitoyltransferase ZDHHC17 OS=Homo sapiens GN=ZDHHC17 PE=1 SV=2	Palmitoyltransferase ZDHHC17 OS=Mus musculus GN=Zdhhc17 PE=2 SV=2	36.518
F1RYJ8	Uncharacterized protein	CSRP2	Cysteine and glycine-rich protein 2 OS=Homo sapiens GN=CSRP2 PE=1 SV=3	Cysteine and glycine-rich protein 2 OS=Mus musculus GN=Csrp2 PE=1 SV=3	20.95	0.812708	1.34598	0.854683	0.931624	1.10904	0.96648	0.722631	1.44947	0.772733	1.50526	0.0299263	1.58271	0.0224849	0.951065	0.635448
F1RYL1	Uncharacterized protein	---	Nucleoporin NUP53 OS=Homo sapiens GN=NUP35 PE=1 SV=1	Nucleoporin NUP53 OS=Mus musculus GN=Nup35 PE=1 SV=2	19.66	0.981739	0.96918	1.0449	1.01575	0.959521	1.02127	1.0083	0.944203	1.04796	0.922538	0.00211607	0.95579	0.0294173	0.96521	0.0558563
F1RYL3	Uncharacterized protein	NCKAP1	Nck-associated protein 1 OS=Homo sapiens GN=NCKAP1 PE=1 SV=1	Nck-associated protein 1 OS=Mus musculus GN=Nckap1 PE=1 SV=2	128.67	1.08148	0.8475	1.05463	1.02994	0.848442	1.07064	1.10042	0.807814	1.10321	0.775522	0.000254364	0.77954	0.00149263	0.994846	0.839542
F1RYL4	Secreted frizzled-related protein 3	FRZB			36.165	1.32197	0.34038	1.28866	1.3965	0.362068	1.17486				0.285139	0.0348624	0.258398	0.0147657	1.10349	0.221568
F1RYL5	Uncharacterized protein	DNAJC10	DnaJ homolog subfamily C member 10 OS=Homo sapiens GN=DNAJC10 PE=1 SV=2	DnaJ homolog subfamily C member 10 OS=Mus musculus GN=Dnajc10 PE=1 SV=2	74.889	0.786359	1.26865	0.984822	0.811443	1.19432	0.991708	0.877737	1.12328	1.03308	1.1916	0.0327876	1.44867	0.00317589	0.822546	0.00955686
F1RYL9	Uncharacterized protein	USP8	Ubiquitin carboxyl-terminal hydrolase 8 OS=Homo sapiens GN=USP8 PE=1 SV=1	Ubiquitin carboxyl-terminal hydrolase 8 OS=Mus musculus GN=Usp8 PE=1 SV=2	124.33	1.16147	0.839626	0.999099	1.09045	0.894824	1.0099				0.863342	0.115609	0.77021	0.0330351	1.12092	0.174207
F1RYM8	Uncharacterized protein	LIN7A	Protein lin-7 homolog A OS=Homo sapiens GN=LIN7A PE=1 SV=2	Protein lin-7 homolog A OS=Mus musculus GN=Lin7a PE=1 SV=2	24.697
F1RYN1	Uncharacterized protein	TNFAIP8L3	Tumor necrosis factor alpha-induced protein 8-like protein 3 OS=Homo sapiens GN=TNFAIP8L3 PE=2 SV=1	Tumor necrosis factor alpha-induced protein 8-like protein 3 OS=Mus musculus GN=Tnfaip8l3 PE=2 SV=1	23.169	1.29499	0.413686	1.24785	1.16775	0.455083	1.31629	1.24573	0.521605	1.33103	0.356948	4.46561e-05	0.374919	0.000108918	0.952067	0.247475
F1RYP5	Uncharacterized protein	CWC22	Pre-mRNA-splicing factor CWC22 homolog OS=Homo sapiens GN=CWC22 PE=1 SV=3	Pre-mRNA-splicing factor CWC22 homolog OS=Mus musculus GN=Cwc22 PE=4 SV=1	104.9	0.936599	1.0598	1.00295	1.04571	0.904643	1.03742	0.980411	0.914555	1.08387	0.921503	0.241338	0.971742	0.666816	0.9483	0.249501
F1RYR2	Uncharacterized protein	---	Activating signal cointegrator 1 complex subunit 3 OS=Homo sapiens GN=ASCC3 PE=1 SV=3	Activating signal cointegrator 1 complex subunit 3 OS=Mus musculus GN=Ascc3 PE=2 SV=1	15.935	0.968237	1.08132	0.954632							1.13271		1.1168		1.01425
F1RYR4	Uncharacterized protein	---	Activating signal cointegrator 1 complex subunit 3 OS=Homo sapiens GN=ASCC3 PE=1 SV=3	Activating signal cointegrator 1 complex subunit 3 OS=Mus musculus GN=Ascc3 PE=2 SV=1	42.297	0.913144	1.14725	0.944687							1.21442		1.25637		0.96661
F1RYS1	Uncharacterized protein	MRPL1	39S ribosomal protein L1, mitochondrial OS=Homo sapiens GN=MRPL1 PE=1 SV=2	39S ribosomal protein L1, mitochondrial OS=Mus musculus GN=Mrpl1 PE=1 SV=2	31.406	0.74109	1.53833	0.744171	0.928019	1.19016	0.898252	0.792074	1.41847	0.773203	1.71672	0.0166862	1.68494	0.015738	1.01886	0.845888
F1RYS5	Uncharacterized protein	SEPT11	Septin-11 OS=Homo sapiens GN=SEPT11 PE=1 SV=3	Septin-11 OS=Mus musculus GN=Sept11 PE=1 SV=4	50.073	0.95011	1.22488	0.839857				0.963999	1.21418	0.819669	1.46973	0.00354851	1.27425	0.00156165	1.15341	0.0135523
F1RYS9	Uncharacterized protein	STBD1	Starch-binding domain-containing protein 1 OS=Homo sapiens GN=STBD1 PE=1 SV=1	Starch-binding domain-containing protein 1 OS=Mus musculus GN=Stbd1 PE=1 SV=1	37.893	0.908759	1.08475	0.977938	0.918707	1.16881	0.935188	0.95006	1.03698	0.958954	1.1457	0.0572241	1.1847	0.0369107	0.967078	0.146843
F1RYT3	Uncharacterized protein	SCARB2	Lysosome membrane protein 2 OS=Homo sapiens GN=SCARB2 PE=1 SV=2	Lysosome membrane protein 2 OS=Mus musculus GN=Scarb2 PE=1 SV=3	54.014	0.979464	1.00871	0.988649	0.877995	0.993062	1.18447	1.06445	0.90795	1.01505	0.912664	0.271214	0.99583	0.951888	0.916486	0.339147
F1RYT5	Uncharacterized protein	NUP54	Nucleoporin p54 OS=Homo sapiens GN=NUP54 PE=1 SV=2	Nuclear pore complex protein Nup54 OS=Mus musculus GN=Nup54 PE=1 SV=1	55.996	1.06802	0.786604	1.09172	1.09399	0.801882	1.07198	1.04001	0.902841	1.0366	0.778465	0.0121715	0.778051	0.0124886	1.00053	0.980995
F1RYU6	Uncharacterized protein	SDAD1	Protein SDA1 homolog OS=Homo sapiens GN=SDAD1 PE=1 SV=3	Protein SDA1 homolog OS=Mus musculus GN=Sdad1 PE=1 SV=1	79.628	0.741346	1.35614	0.910641	0.73478	1.51144	0.791945				1.68425	0.0315183	1.94264	0.0703176	0.866991	0.306575
F1RYU9	Uncharacterized protein	USO1	General vesicular transport factor p115 OS=Homo sapiens GN=USO1 PE=1 SV=2	General vesicular transport factor p115 OS=Mus musculus GN=Uso1 PE=1 SV=2	107.33	0.933348	1.19406	0.847133	0.928161	1.22561	0.866856	0.933412	1.21565	0.864496	1.40987	2.08872e-05	1.30069	0.000781941	1.08394	0.00462519
F1RYX5	Uncharacterized protein	DEAF1	Deformed epidermal autoregulatory factor 1 homolog OS=Homo sapiens GN=DEAF1 PE=1 SV=1	Deformed epidermal autoregulatory factor 1 homolog OS=Mus musculus GN=Deaf1 PE=1 SV=1	58.825
F1RYY0	Uncharacterized protein	FKBP5	Peptidyl-prolyl cis-trans isomerase FKBP5 OS=Homo sapiens GN=FKBP5 PE=1 SV=2	Peptidyl-prolyl cis-trans isomerase FKBP5 OS=Mus musculus GN=Fkbp5 PE=1 SV=1	51.046	1.34538	0.416481	1.2211	1.30857	0.460103	1.20059	1.2343	0.567583	1.20617	0.398078	0.00329198	0.371417	0.000221791	1.07178	0.112624
F1RYY6	Transaldolase	TALDO1			37.216	0.933401	1.20946	0.855763	0.907804	1.08687	1.00785	0.833036	1.38588	0.75662	1.4053	0.0369191	1.37692	0.048333	1.02061	0.836142
F1RYY7	Uncharacterized protein	PDDC1	Parkinson disease 7 domain-containing protein 1 OS=Homo sapiens GN=PDDC1 PE=1 SV=1	Parkinson disease 7 domain-containing protein 1 OS=Mus musculus GN=Pddc1 PE=1 SV=1	24.188	1.25448	0.778691	0.969811							0.802931		0.620728		1.29353
F1RYY8	Uncharacterized protein	SLC25A22	Mitochondrial glutamate carrier 1 OS=Homo sapiens GN=SLC25A22 PE=1 SV=1	Mitochondrial glutamate carrier 1 OS=Mus musculus GN=Slc25a22 PE=1 SV=1	34.47	0.957451	1.16919	0.895437	1.04124	1.09354	0.870373	0.94708	1.11977	0.930184	1.25464	0.00157936	1.14825	0.0200908	1.09265	0.0889128
F1RYZ0	60S acidic ribosomal protein P2	RPLP2			11.693	0.717202	1.54353	0.77731	0.731445	1.49226	0.833941	0.823432	1.30133	0.861544	1.75394	0.0082295	1.90888	0.00449932	0.918831	0.18808
F1RYZ5	Ribosomal protein	RPL10A			19.717	0.942432	1.16219	0.904236							1.28527		1.23318		1.04224
F1RZ01	Uncharacterized protein	CHID1	Chitinase domain-containing protein 1 OS=Homo sapiens GN=CHID1 PE=1 SV=1	Chitinase domain-containing protein 1 OS=Mus musculus GN=Chid1 PE=2 SV=1	44.553	0.741252	1.39202	0.877892	0.800226	1.30489	0.867506	0.817437	1.29296	0.862389	1.52998	0.00392074	1.6914	0.00025062	0.904566	0.0643118
F1RZ02	Uncharacterized protein	AP2A2	AP-2 complex subunit alpha-2 OS=Homo sapiens GN=AP2A2 PE=1 SV=2	AP-2 complex subunit alpha-2 OS=Mus musculus GN=Ap2a2 PE=1 SV=2	92.093	1.03901	0.993832	0.973097	1.00123	0.966047	1.02033	1.06648	0.978216	0.951982	0.997517	0.918778	0.945721	0.0805	1.05477	0.124276
F1RZ13	Uncharacterized protein	ANKS1A	Ankyrin repeat and SAM domain-containing protein 1A OS=Homo sapiens GN=ANKS1A PE=1 SV=4	Ankyrin repeat and SAM domain-containing protein 1A OS=Mus musculus GN=Anks1a PE=1 SV=3	125.34							1.02469	0.941166	1.03603	0.908431		0.91849		0.989049
F1RZ16	U1 small nuclear ribonucleoprotein C	SNRPC			17.394	0.359972	2.19092	0.495539	0.408601	1.86698	0.736376	0.458541	1.71359	0.741299	2.92492	0.00348915	4.70331	0.00672032	0.621886	0.0787571
F1RZ19	Protein YIPF	LOC100519121			26.056	1.06475	0.975814	0.96293	0.947753	1.00766	1.0411				0.989744	0.839929	0.98558	0.846423	1.00423	0.958178
F1RZ24	Uncharacterized protein	DKC1	H/ACA ribonucleoprotein complex subunit 4 OS=Homo sapiens GN=DKC1 PE=1 SV=3	H/ACA ribonucleoprotein complex subunit 4 OS=Mus musculus GN=Dkc1 PE=1 SV=4	58.136	1.037	1.04428	0.926053	1.05634	1.03909	0.896806	1.10405	0.916335	0.982322	1.06934	0.268634	0.938173	0.254033	1.13981	0.0166999
F1RZ28	Uncharacterized protein	RPS10	40S ribosomal protein S10 OS=Homo sapiens GN=RPS10 PE=1 SV=1	40S ribosomal protein S10 OS=Mus musculus GN=Rps10 PE=1 SV=1	18.932	1.23938	0.750044	1.0183	1.18102	0.942791	0.852244	1.40999	0.666769	0.995215	0.823377	0.169236	0.616021	0.0108126	1.3366	0.0229842
F1RZ35	Uncharacterized protein	F8A1	Factor VIII intron 22 protein OS=Homo sapiens GN=F8A1 PE=1 SV=2	Factor 8-associated gene A OS=Mus musculus GN=F8a PE=2 SV=1	40.78	1.14535	0.914205	0.9456				1.01721	0.934815	1.04918	0.926932	0.386703	0.855014	0.239891	1.08411	0.419647
F1RZ67	Inactive rhomboid protein	RHBDF2			93.594	0.878914	1.25082	0.890425	0.691911	1.46295	0.873976	0.907584	1.15603	0.955451	1.4228	0.0434867	1.5614	0.017428	0.91123	0.358708
F1RZ71	Uncharacterized protein	SEPT9	Septin-9 OS=Homo sapiens GN=SEPT9 PE=1 SV=2	Septin-9 OS=Mus musculus GN=Sept9 PE=1 SV=1	65.242	1.15556	0.806898	1.03444	1.01362	0.931198	1.0482	0.933317	1.28943	0.812322	1.04579	0.804412	0.975833	0.885523	1.07169	0.5293
F1RZ74	Uncharacterized protein	USP36	Ubiquitin carboxyl-terminal hydrolase 36 OS=Homo sapiens GN=USP36 PE=1 SV=3	Ubiquitin carboxyl-terminal hydrolase 36 OS=Mus musculus GN=Usp36 PE=2 SV=1	120.26
F1RZ77	Uncharacterized protein	CBX8	Chromobox protein homolog 8 OS=Homo sapiens GN=CBX8 PE=1 SV=3	Chromobox protein homolog 8 OS=Mus musculus GN=Cbx8 PE=1 SV=1	41.97				1.06236	0.989019	0.952557				1.03828		0.93096		1.11528
F1RZ82	Uncharacterized protein	GAA	Lysosomal alpha-glucosidase OS=Homo sapiens GN=GAA PE=1 SV=4	Lysosomal alpha-glucosidase OS=Mus musculus GN=Gaa PE=1 SV=2	97.504	0.931303	0.922033	1.11054	0.920175	0.824084	1.14996	0.981451	0.876356	1.16993	0.764474	0.00265747	0.925711	0.118365	0.825824	0.00152642
F1RZ89	Uncharacterized protein	---	N-sulphoglucosamine sulphohydrolase OS=Homo sapiens GN=SGSH PE=1 SV=1	Heparan N-sulfatase OS=Mus musculus GN=Sgsh PE=2 SV=1	55.319	0.881097	1.15618	0.965816	0.895063	1.02773	1.07168				1.07186	0.474746	1.22957	0.190728	0.871739	0.240146
F1RZ95	Uncharacterized protein	TM2D3	TM2 domain-containing protein 3 OS=Homo sapiens GN=TM2D3 PE=2 SV=2	TM2 domain-containing protein 3 OS=Mus musculus GN=Tm2d3 PE=2 SV=1	27.742	0.947021	1.10209	0.95503	0.987916	1.1292	0.897137	1.01274	0.995453	0.992901	1.13415	0.0697921	1.09467	0.136238	1.03607	0.37554
F1RZ96	Uncharacterized protein	TARSL2	Probable threonine--tRNA ligase 2, cytoplasmic OS=Homo sapiens GN=TARSL2 PE=1 SV=1	Probable threonine--tRNA ligase 2, cytoplasmic OS=Mus musculus GN=Tarsl2 PE=2 SV=1	92.309	1.16037	0.732841	1.09781							0.667549		0.631556		1.05699
F1RZA0	Uncharacterized protein	TXNL4A	Thioredoxin-like protein 4A OS=Homo sapiens GN=TXNL4A PE=1 SV=1	Thioredoxin-like protein 4A OS=Mus musculus GN=Txnl4a PE=2 SV=1	16.8
F1RZA4	Uncharacterized protein	---	E3 ubiquitin-protein ligase RNF213 OS=Homo sapiens GN=RNF213 PE=1 SV=3	E3 ubiquitin-protein ligase RNF213 OS=Mus musculus GN=Rnf213 PE=2 SV=2	169.16	1.0857	0.765581	1.10626	0.947117	0.816178	1.10505	1.04702	0.813652	1.14528	0.713645	0.000147935	0.777774	0.019795	0.917548	0.14527
F1RZA6	Uncharacterized protein	RNF213	E3 ubiquitin-protein ligase RNF213 OS=Homo sapiens GN=RNF213 PE=1 SV=3	E3 ubiquitin-protein ligase RNF213 OS=Mus musculus GN=Rnf213 PE=2 SV=1	369.32	1.10623	0.755492	1.10905	1.0363	0.79069	1.13957	1.07749	0.788958	1.12701	0.691765	2.98381e-05	0.725196	0.000823585	0.953902	0.10942
F1RZA9	Uncharacterized protein	CEP131	Centrosomal protein of 131 kDa OS=Homo sapiens GN=CEP131 PE=1 SV=3	5-azacytidine-induced protein 1 OS=Mus musculus GN=Azi1 PE=1 SV=2	121.55	0.950326	1.09488	0.958606	0.91992	1.13356	0.955582	0.85026	1.07	1.06695	1.10644	0.0831373	1.21244	0.00868941	0.912574	0.14203
F1RZB0	Uncharacterized protein	BAIAP2	Brain-specific angiogenesis inhibitor 1-associated protein 2 OS=Homo sapiens GN=BAIAP2 PE=1 SV=1	Brain-specific angiogenesis inhibitor 1-associated protein 2 OS=Mus musculus GN=Baiap2 PE=1 SV=2	58.861	0.801465	1.37402	0.839306							1.63709		1.71439		0.954914
F1RZB7	Uncharacterized protein	LEO1	RNA polymerase-associated protein LEO1 OS=Homo sapiens GN=LEO1 PE=1 SV=1	RNA polymerase-associated protein LEO1 OS=Mus musculus GN=Leo1 PE=1 SV=2	75.531	1.02581	0.902288	1.04174	1.02449	0.94765	1.00767	1.02354	0.975276	0.99114	0.92918	0.0573253	0.919115	0.0598996	1.01095	0.533943
F1RZC3	Uncharacterized protein	SESTD1	SEC14 domain and spectrin repeat-containing protein 1 OS=Homo sapiens GN=SESTD1 PE=1 SV=2	SEC14 domain and spectrin repeat-containing protein 1 OS=Mus musculus GN=Sestd1 PE=2 SV=1	79.359	1.19917	0.510891	1.20969				1.05489	0.859196	1.09007	0.595752	0.20046	0.60783	0.203495	0.98013	0.830792
F1RZD2	Uncharacterized protein	MYO5A	Unconventional myosin-Va OS=Homo sapiens GN=MYO5A PE=1 SV=2	Unconventional myosin-Va OS=Mus musculus GN=Myo5a PE=2 SV=1	220.54	0.933106	1.12829	0.93451	0.92036	1.19775	0.89503	0.96305	1.00196	0.964847	1.19096	0.0767332	1.1816	0.0905216	1.00792	0.775281
F1RZE0	Uncharacterized protein	PRKRA	Interferon-inducible double-stranded RNA-dependent protein kinase activator A OS=Homo sapiens GN=PRKRA PE=1 SV=1	Interferon-inducible double-stranded RNA-dependent protein kinase activator A OS=Mus musculus GN=Prkra PE=1 SV=1	34.36	1.00623	0.866942	1.10261	1.00994	0.924571	1.065	1.01521	0.77423	1.17697	0.767135	0.0108368	0.846393	0.0706997	0.906358	0.085684
F1RZE1	Uncharacterized protein	RBM45	RNA-binding protein 45 OS=Homo sapiens GN=RBM45 PE=2 SV=1	RNA-binding protein 45 OS=Mus musculus GN=Rbm45 PE=2 SV=1	53.627	1.07337	0.875829	1.04653	1.07978	0.845164	1.06346	0.995668	0.908858	1.09467	0.820636	0.00154045	0.835186	0.00865758	0.982579	0.584577
F1RZE9	Uncharacterized protein	CCPG1	Cell cycle progression protein 1 OS=Homo sapiens GN=CCPG1 PE=2 SV=3	Cell cycle progression 1, isoform CRA_d OS=Mus musculus GN=Ccpg1 PE=4 SV=1	85.37	0.835478	1.29807	0.875215	0.940085	1.20961	0.870043	0.895515	1.0819	0.990195	1.31224	0.0253417	1.34387	0.02368	0.976466	0.688713
F1RZG1	Uncharacterized protein	HOXD8	Homeobox protein Hox-D8 OS=Homo sapiens GN=HOXD8 PE=2 SV=2	Homeobox protein Hox-D8 OS=Mus musculus GN=Hoxd8 PE=2 SV=4	24.558	1.01769	0.995301	0.988121							1.00727		0.977997		1.02993
F1RZH1	Uncharacterized protein	MYZAP	Myocardial zonula adherens protein OS=Homo sapiens GN=MYZAP PE=1 SV=1	Myocardial zonula adherens protein OS=Mus musculus GN=Myzap PE=1 SV=1	54.293	0.812525	1.23427	0.873019	0.939602	1.08497	0.980394	0.828646	1.0791	1.07761	1.15944	0.117772	1.31679	0.0151148	0.880502	0.186764
F1RZH3	Disintegrin and metalloproteinase domain-containing protein 10	ADAM10			66.389	0.93392	1.15221	0.921153	0.874919	1.19227	0.934011	0.987742	1.08835	0.924883	1.23481	0.0175323	1.22751	0.00896134	1.00595	0.881656
F1RZH4	Uncharacterized protein	---	40S ribosomal protein S15a OS=Homo sapiens GN=RPS15A PE=1 SV=2	40S ribosomal protein S15a OS=Mus musculus GN=Rps15a PE=2 SV=2	14.288	1.09079	0.877582	1.02899	1.07376	0.864166	1.01807	1.0407	0.944116	1.08628	0.857186	0.0107252	0.837957	0.00722714	1.02295	0.410751
F1RZJ3	Uncharacterized protein	WHSC1L1	Histone-lysine N-methyltransferase NSD3 OS=Homo sapiens GN=WHSC1L1 PE=1 SV=1	Histone-lysine N-methyltransferase NSD3 OS=Mus musculus GN=Whsc1l1 PE=1 SV=2	161.39	0.979777	1.00368	1.01257	1.0428	0.951063	0.984158	0.993668	0.927833	1.02641	0.953505	0.161626	0.955685	0.206942	0.997719	0.925336
F1RZK2	Uncharacterized protein	TSPYL1	Testis-specific Y-encoded-like protein 1 OS=Homo sapiens GN=TSPYL1 PE=1 SV=3	Testis-specific Y-encoded-like protein 1 OS=Mus musculus GN=Tspyl1 PE=2 SV=1	48.85	0.815428	1.39278	0.809376	0.892453	0.936161	1.15481	0.755579	1.46105	0.764119	1.38914	0.166335	1.53848	0.108143	0.902927	0.555365
F1RZK8	Histone deacetylase	HDAC2			61.54	1.08574	0.906743	1.03626	1.10052	0.928425	0.933754	1.05611	0.95839	0.966289	0.951388	0.255517	0.86158	0.00179063	1.10424	0.0607871
F1RZL1	Uncharacterized protein	PLEKHA2	Pleckstrin homology domain-containing family A member 2 OS=Homo sapiens GN=PLEKHA2 PE=1 SV=2	Pleckstrin homology domain-containing family A member 2 OS=Mus musculus GN=Plekha2 PE=1 SV=1	34.733	1.10552	0.74555	1.13634	1.21562	0.718445	1.05077	1.13107	0.83995	1.03168	0.71578	0.00357478	0.667384	0.00158545	1.07252	0.168142
F1RZL2	Uncharacterized protein	LOC102165804	Serine protease HTRA4 OS=Homo sapiens GN=HTRA4 PE=2 SV=1	Serine protease HTRA4 OS=Mus musculus GN=Htra4 PE=2 SV=1	35.568	1.28724	0.500226	1.19464	1.27197	0.543089	1.15379	1.28915	0.381228	1.35205	0.384961	0.000763603	0.370168	0.00324453	1.03996	0.500758
F1RZL4	Uncharacterized protein	ADAM9	Disintegrin and metalloproteinase domain-containing protein 9 OS=Homo sapiens GN=ADAM9 PE=1 SV=1	Disintegrin and metalloproteinase domain-containing protein 9 OS=Mus musculus GN=Adam9 PE=1 SV=2	90.511	1.01318	0.974078	1.03481	0.986964	0.995951	1.02225	1.06213	0.868329	1.06109	0.910269	0.132555	0.926879	0.192792	0.98208	0.507382
F1RZN4	Uncharacterized protein	TLR3	Toll-like receptor 3 OS=Homo sapiens GN=TLR3 PE=1 SV=1	Toll-like receptor 3 OS=Mus musculus GN=Tlr3 PE=1 SV=2	103.39	1.09916	0.906027	0.995316	0.938031	1.01084	1.04721				0.938478	0.428256	0.940935	0.604215	0.997389	0.97926
F1RZP1	Uncharacterized protein	TRAF3IP2	Adapter protein CIKS OS=Homo sapiens GN=TRAF3IP2 PE=1 SV=3	Protein Traf3ip2 OS=Mus musculus GN=Traf3ip2 PE=1 SV=1	63.582
F1RZP9	Uncharacterized protein	MICAL1	Protein-methionine sulfoxide oxidase MICAL1 OS=Homo sapiens GN=MICAL1 PE=1 SV=2	Protein-methionine sulfoxide oxidase MICAL1 OS=Mus musculus GN=Mical1 PE=1 SV=1	119.94	1.2559	0.517658	1.18014	1.28403	0.495794	1.19043	1.29782	0.429863	1.31358	0.391764	0.000373597	0.376084	0.000159367	1.04169	0.355225
F1RZQ3	Uncharacterized protein	UFSP2	Ufm1-specific protease 2 OS=Homo sapiens GN=UFSP2 PE=1 SV=3	Ufm1-specific protease 2 OS=Mus musculus GN=Ufsp2 PE=1 SV=1	53.353	0.922868	1.12203	0.958873	0.930581	1.08647	0.987334	0.982084	1.07685	1.00323	1.11389	0.00410802	1.15864	0.00385625	0.96138	0.177663
F1RZQ6	Uncharacterized protein	SLC25A4	ADP/ATP translocase 1 OS=Homo sapiens GN=SLC25A4 PE=1 SV=4	ADP/ATP translocase 1 OS=Mus musculus GN=Slc25a4 PE=1 SV=4	33.026	0.721571	1.3631	0.92235	0.713442	1.38631	0.876525	0.823247	1.18083	0.974708	1.41703	0.0154433	1.74038	0.00438159	0.814203	0.0209085
F1RZQ8	Uncharacterized protein	LEMD2	LEM domain-containing protein 2 OS=Homo sapiens GN=LEMD2 PE=1 SV=1	LEM domain-containing protein 2 OS=Mus musculus GN=Lemd2 PE=1 SV=1	57.763	0.974759	1.01228	1.01356	0.974918	1.13128	0.917433	0.977508	0.954044	1.03893	1.04299	0.545867	1.05822	0.38984	0.985608	0.737338
F1RZQ9	Uncharacterized protein	UQCC2	Ubiquinol-cytochrome-c reductase complex assembly factor 2 OS=Homo sapiens GN=UQCC2 PE=1 SV=1	Ubiquinol-cytochrome-c reductase complex assembly factor 2 OS=Mus musculus GN=Uqcc2 PE=1 SV=1	16.258	0.919727	1.07102	0.946781	0.945684	1.22432	0.851946	0.943691	1.1338	0.918197	1.26214	0.0157424	1.22072	0.0393584	1.03393	0.390044
F1RZR0	Uncharacterized protein	ITPR3	Inositol 1,4,5-trisphosphate receptor type 3 OS=Homo sapiens GN=ITPR3 PE=1 SV=2	Inositol 1,4,5-trisphosphate receptor type 3 OS=Mus musculus GN=Itpr3 PE=1 SV=3	303.8
F1RZR2	Uncharacterized protein	BAK1	Bcl-2 homologous antagonist/killer OS=Homo sapiens GN=BAK1 PE=1 SV=1	Bcl-2 homologous antagonist/killer OS=Mus musculus GN=Bak1 PE=2 SV=1	23.62				1.02651	0.92675	1.07659				0.860819		0.902819		0.953478
F1RZR6	Uncharacterized protein	CUTA	Protein CutA OS=Homo sapiens GN=CUTA PE=1 SV=2	Protein CutA OS=Mus musculus GN=Cuta PE=2 SV=1	18.922	0.882189	1.30091	0.832395							1.56285		1.47464		1.05982
F1RZR9	Chloride intracellular channel protein	CLIC2			28.312	1.35505	0.410233	1.21498							0.337645		0.302744		1.11528
F1RZS1	Uncharacterized protein	TMLHE	Trimethyllysine dioxygenase, mitochondrial OS=Homo sapiens GN=TMLHE PE=1 SV=1	Trimethyllysine dioxygenase, mitochondrial OS=Mus musculus GN=Tmlhe PE=1 SV=2	40.545	0.927249	1.02717	1.04166	0.961195	0.998379	1.05044	0.962692	1.00122	1.0269	0.970427	0.0594896	1.0616	0.0183239	0.914117	0.00539196
F1RZS7	Uncharacterized protein	---	Kinesin-like protein KIFC1 OS=Homo sapiens GN=KIFC1 PE=1 SV=2	Kinesin-like protein KIFC1 OS=Mus musculus GN=Kifc1 PE=1 SV=2	55.823	0.920586	1.28591	0.811012				1.05618	1.1167	0.832584	1.4618	0.134802	1.21542	0.194512	1.20271	0.239099
F1RZS8	Uncharacterized protein	DAXX	Death domain-associated protein 6 OS=Homo sapiens GN=DAXX PE=1 SV=2	Death domain-associated protein 6 OS=Mus musculus GN=Daxx PE=2 SV=1	83.792	1.05562	0.846609	1.06325	1.10585	0.820148	1.06761	1.06937	0.883568	1.06196	0.79877	0.00691156	0.789367	0.000809533	1.01191	0.487152
F1RZT1	Uncharacterized protein	RGL2	Ral guanine nucleotide dissociation stimulator-like 2 OS=Homo sapiens GN=RGL2 PE=1 SV=1	Ral guanine nucleotide dissociation stimulator-like 2 OS=Mus musculus GN=Rgl2 PE=1 SV=2	82.707	1.13278	0.755634	1.10218							0.685582		0.66706		1.02777
F1RZT2	Uncharacterized protein	PFDN6	Prefoldin subunit 6 OS=Homo sapiens GN=PFDN6 PE=1 SV=1	Prefoldin subunit 6 OS=Mus musculus GN=Pfdn6 PE=2 SV=1	14.597	0.689202	1.59726	0.737698	0.739013	1.42365	0.86548	0.594192	1.68959	0.683898	2.05962	0.00172404	2.32916	0.00181917	0.884276	0.271217
F1RZT4	Hexosyltransferase	B3GALT4			41.322
F1RZT5	Uncharacterized protein	VPS52	Vacuolar protein sorting-associated protein 52 homolog OS=Homo sapiens GN=VPS52 PE=1 SV=1	Vacuolar protein sorting-associated protein 52 homolog OS=Mus musculus GN=Vps52 PE=2 SV=1	82.493	1.09164	0.887987	1.0187	1.11397	0.781678	1.08812	1.07724	0.87755	1.06163	0.80393	0.0108015	0.775916	0.0123524	1.0361	0.193039
F1RZU3	Uncharacterized protein	HCFC1	Host cell factor 1 OS=Homo sapiens GN=HCFC1 PE=1 SV=2	Host cell factor 1 OS=Mus musculus GN=Hcfc1 PE=2 SV=1	211.52	1.0894	0.821049	1.06728	1.14743	0.813232	1.03377				0.777842	0.0361721	0.730622	0.0570772	1.06463	0.21081
F1RZU8	Uncharacterized protein	DST	Dystonin OS=Homo sapiens GN=DST PE=1 SV=4	Dystonin OS=Mus musculus GN=Dst PE=4 SV=1	842.75	0.892285	1.15104	0.914683	0.909301	1.14605	0.954097	0.9557	1.02447	1.01245	1.15283	0.0499877	1.20465	0.0292804	0.956982	0.301837
F1RZV0	Uncharacterized protein	ZNF451	Zinc finger protein 451 OS=Homo sapiens GN=ZNF451 PE=1 SV=2	Zinc finger protein 451 OS=Mus musculus GN=Znf451 PE=2 SV=1	119.46	1.05548	0.851303	1.06838	1.07185	0.913609	0.996726	1.03993	0.879381	1.05024	0.848797	0.00547211	0.834883	0.00337536	1.01667	0.518362
F1RZV1	Uncharacterized protein	BAG2	BAG family molecular chaperone regulator 2 OS=Homo sapiens GN=BAG2 PE=1 SV=1	BAG family molecular chaperone regulator 2 OS=Mus musculus GN=Bag2 PE=1 SV=1	23.644	0.8849	1.2186	0.8703	0.929199	1.25673	0.836554	0.916154	1.2325	0.842627	1.45434	1.50013e-05	1.35805	5.5994e-05	1.07091	0.024914
F1RZV2	Uncharacterized protein	RAB23	Ras-related protein Rab-23 OS=Homo sapiens GN=RAB23 PE=1 SV=1	Ras-related protein Rab-23 OS=Mus musculus GN=Rab23 PE=1 SV=2	26.727	1.08859	0.897274	1.0144	1.04381	0.919018	1.03938	1.06731	0.818437	1.08213	0.840179	0.014466	0.823427	0.0144015	1.02034	0.426522
F1RZV4	DNA primase large subunit	PRIM2			58.517	0.910748	1.22272	0.877822	0.987324	1.16521	0.865922				1.36943	0.0480353	1.25808	0.0421274	1.0885	0.287232
F1RZV7	Uncharacterized protein	GCLC	Glutamate--cysteine ligase catalytic subunit OS=Homo sapiens GN=GCLC PE=1 SV=2	Glutamate--cysteine ligase catalytic subunit OS=Mus musculus GN=Gclc PE=2 SV=4	72.935	0.729182	1.40968	0.881181	0.720777	1.33326	0.931905	0.747259	1.40797	0.831248	1.56974	0.000223653	1.88917	0.000631259	0.830915	0.0290673
F1RZV9	Uncharacterized protein	LRRC1	Leucine-rich repeat-containing protein 1 OS=Homo sapiens GN=LRRC1 PE=1 SV=1	Leucine rich repeat containing 1, isoform CRA_b OS=Mus musculus GN=Lrrc1 PE=4 SV=1	49.567
F1RZY6	Uncharacterized protein	CHMP6	Charged multivesicular body protein 6 OS=Homo sapiens GN=CHMP6 PE=1 SV=3	Charged multivesicular body protein 6 OS=Mus musculus GN=Chmp6 PE=2 SV=2	21.084	0.8531	1.25801	0.898247							1.40051		1.47463		0.949739
F1RZY7	Uncharacterized protein	RPTOR	Regulatory-associated protein of mTOR OS=Homo sapiens GN=RPTOR PE=1 SV=1	Regulatory-associated protein of mTOR OS=Mus musculus GN=Rptor PE=4 SV=1	116.06	1.16875	0.744147	1.0798	1.11086	0.806867	1.05871	1.10917	0.789468	1.10994	0.720491	0.000297919	0.690656	0.000210563	1.0432	0.135015
F1RZY9	Uncharacterized protein	METRNL	Meteorin-like protein OS=Homo sapiens GN=METRNL PE=2 SV=1	Meteorin-like protein OS=Mus musculus GN=Metrnl PE=2 SV=1	28.15
F1RZZ1	Uncharacterized protein	TBCD	Tubulin-specific chaperone D OS=Homo sapiens GN=TBCD PE=1 SV=2	Tubulin-specific chaperone D OS=Mus musculus GN=Tbcd PE=2 SV=1	132.51	1.16069	0.715938	1.09353	1.16403	0.681141	1.13093	1.13877	0.75533	1.11815	0.643931	0.000503805	0.621456	0.000825354	1.03616	0.0460403
F1RZZ3	Uncharacterized protein	FN3KRP	Ketosamine-3-kinase OS=Homo sapiens GN=FN3KRP PE=1 SV=2	Ketosamine-3-kinase OS=Mus musculus GN=Fn3krp PE=2 SV=2	34.111	0.858846	1.36961	0.773566	0.854055	1.06994	1.03111	0.729326	1.47304	0.776131	1.51603	0.0457474	1.60206	0.0435079	0.946303	0.66202
F1S006	Uncharacterized protein	FN3K	Fructosamine-3-kinase OS=Homo sapiens GN=FN3K PE=1 SV=1	Fructosamine-3-kinase OS=Mus musculus GN=Fn3k PE=2 SV=1	34.935	1.15539	0.749919	1.08674	1.09789	0.888697	1.00848				0.782072	0.134462	0.727215	0.103513	1.07544	0.255953
F1S010	Uncharacterized protein	C17orf62		Protein BC017643 (Fragment) OS=Mus musculus GN=BC017643 PE=2 SV=1	20.66	0.93476	1.18227	0.892877	0.850795	1.26159	0.905997	0.997182	0.940752	1.06154	1.18326	0.208212	1.21629	0.161568	0.972844	0.726791
F1S012	Uncharacterized protein	FOXK2	Forkhead box protein K2 OS=Homo sapiens GN=FOXK2 PE=1 SV=3	Forkhead box protein K2 OS=Mus musculus GN=Foxk2 PE=1 SV=3	68.424	1.0622	0.994454	0.948198	0.966114	1.05944	0.978627	0.973793	1.06794	0.965717	1.07927	0.0665172	1.03988	0.363617	1.03788	0.358395
F1S018	Uncharacterized protein	CAMSAP1	Calmodulin-regulated spectrin-associated protein 1 OS=Homo sapiens GN=CAMSAP1 PE=1 SV=2	Calmodulin-regulated spectrin-associated protein 1 OS=Mus musculus GN=Camsap1 PE=1 SV=1	167.04	1.09594	0.748388	1.16887	1.10954	0.845561	1.03584	1.2776	0.716873	1.02852	0.71471	0.00728936	0.663442	0.00762687	1.07728	0.327434
F1S026	Uncharacterized protein	---	Cleft lip and palate transmembrane protein 1-like protein OS=Homo sapiens GN=CLPTM1L PE=1 SV=1	Cleft lip and palate transmembrane protein 1-like protein OS=Mus musculus GN=Clptm1l PE=2 SV=1	16.32	0.688763	1.45071	0.872187							1.6633		2.10626		0.789697
F1S029	Uncharacterized protein	LPCAT1	Lysophosphatidylcholine acyltransferase 1 OS=Homo sapiens GN=LPCAT1 PE=1 SV=2	Lysophosphatidylcholine acyltransferase 1 OS=Mus musculus GN=Lpcat1 PE=1 SV=1	59.323	0.866411	1.26172	0.925861	0.797129	1.29689	0.894806	0.958244	1.07021	0.970671	1.30003	0.0476635	1.3841	0.0216729	0.939258	0.357227
F1S031	NADH dehydrogenase [ubiquinone] iron-sulfur protein 6, mitochondrial	NDUFS6			13.329	0.705756	1.21358	1.03394	0.886431	1.2352	0.896627	0.808108	1.23698	0.949422	1.27978	0.0185996	1.53555	0.0131921	0.833439	0.0764901
F1S033	Uncharacterized protein	BRD3	Bromodomain-containing protein 3 OS=Homo sapiens GN=BRD3 PE=1 SV=1	Bromodomain-containing protein 3 OS=Mus musculus GN=Brd3 PE=1 SV=2	79.609	0.98794	0.988246	0.990921	1.04886	0.996928	0.945152	0.956223	1.0711	0.946512	1.06025	0.146599	1.02113	0.60689	1.03831	0.318347
F1S034	Uncharacterized protein	WDR5	WD repeat-containing protein 5 OS=Homo sapiens GN=WDR5 PE=1 SV=1	WD repeat-containing protein 5 OS=Mus musculus GN=Wdr5 PE=1 SV=1	36.526	0.952371	1.08925	0.970832	0.935649	1.22275	0.852735	0.933512	1.14683	0.917318	1.26194	0.0100932	1.22587	0.0291303	1.02942	0.515044
F1S049	Uncharacterized protein	MED10	Mediator of RNA polymerase II transcription subunit 10 OS=Homo sapiens GN=MED10 PE=1 SV=1	Mediator of RNA polymerase II transcription subunit 10 OS=Mus musculus GN=Med10 PE=1 SV=1	15.679	0.915982	0.942538	1.1294	1.02588	0.963355	0.98181	1.06131	0.918076	1.02561	0.900267	0.130597	0.940331	0.303895	0.957394	0.511393
F1S052	Uncharacterized protein	LOC102161684	SAFB-like transcription modulator OS=Homo sapiens GN=SLTM PE=1 SV=2	SAFB-like transcription modulator OS=Mus musculus GN=Sltm PE=1 SV=1	41.453				0.828777	1.29318	0.862593	0.821782	1.29	0.873965	1.48752	0.00474917	1.56503	0.000886803	0.950478	0.0361318
F1S057	Uncharacterized protein	MYO1E	Unconventional myosin-Ie OS=Homo sapiens GN=MYO1E PE=1 SV=2	Unconventional myosin-Ie OS=Mus musculus GN=Myo1e PE=1 SV=1	127.28	1.13725	0.743523	1.08947	1.09626	0.876896	1.02099	1.10651	0.756272	1.13825	0.731581	0.00675388	0.71158	0.0119182	1.02811	0.472472
F1S059	Uncharacterized protein	LOC100522410	BCL2/adenovirus E1B 19 kDa protein-interacting protein 2 OS=Homo sapiens GN=BNIP2 PE=1 SV=1	BCL2/adenovirus E1B 19 kDa protein-interacting protein 2 OS=Mus musculus GN=Bnip2 PE=2 SV=1	34.591	0.997592	0.897064	1.09639							0.8182		0.899229		0.909891
F1S061	Uncharacterized protein	SCRN3	Secernin-3 OS=Homo sapiens GN=SCRN3 PE=1 SV=1	Secernin-3 OS=Mus musculus GN=Scrn3 PE=1 SV=1	28.976	1.06712	0.714447	1.19991	1.10697	0.674187	1.18932				0.581206	0.0176537	0.638719	0.00516434	0.909956	0.0984851
F1S062	Uncharacterized protein	OLA1	Obg-like ATPase 1 OS=Homo sapiens GN=OLA1 PE=1 SV=2	Obg-like ATPase 1 OS=Mus musculus GN=Ola1 PE=1 SV=1	27.584	1.23877	0.646853	1.10736	1.16618	0.643058	1.18627	1.1351	0.771003	1.11507	0.604605	0.0019286	0.582172	0.00104967	1.03853	0.333985
F1S066	Uncharacterized protein	---	Mitogen-activated protein kinase kinase kinase MLT OS=Homo sapiens GN=ZAK PE=1 SV=3	Mitogen-activated protein kinase kinase kinase MLT OS=Mus musculus GN=Mltk PE=1 SV=1	72.236	1.17105	0.628424	1.18359							0.530948		0.536634		0.989403
F1S078	Uncharacterized protein	---	Talin-2 OS=Homo sapiens GN=TLN2 PE=1 SV=4	Talin-2 OS=Mus musculus GN=Tln2 PE=1 SV=3	39.737	1.00234	1.05004	0.946421	0.983587	1.08054	0.955064	0.942728	1.07681	0.96558	1.1187	0.00150268	1.09518	0.0176733	1.02148	0.365039
F1S084	Uncharacterized protein	HAT1	Histone acetyltransferase type B catalytic subunit OS=Homo sapiens GN=HAT1 PE=1 SV=1	Histone acetyltransferase type B catalytic subunit OS=Mus musculus GN=Hat1 PE=2 SV=1	49.327	1.30603	0.621886	1.06011	1.24235	0.646028	1.10468	1.12318	0.831283	1.06632	0.649682	0.0252448	0.571746	0.00405125	1.13631	0.103183
F1S085	Methionine aminopeptidase 1	METAP1D			37.49	0.731438	1.28648	0.98344	0.6166	1.52036	0.892333				1.49636	0.121511	2.08216	0.0588165	0.718658	0.0745729
F1S086	Uncharacterized protein	SLC25A12	Calcium-binding mitochondrial carrier protein Aralar1 OS=Homo sapiens GN=SLC25A12 PE=1 SV=2	Calcium-binding mitochondrial carrier protein Aralar1 OS=Mus musculus GN=Slc25a12 PE=1 SV=1	44.64	0.963247	1.17345	0.916051	0.916706	1.16091	0.931295	0.918388	1.04117	0.993049	1.1884	0.0319187	1.20626	0.0329455	0.985194	0.647538
F1S087	Uncharacterized protein	DYNC1I2	Cytoplasmic dynein 1 intermediate chain 2 OS=Homo sapiens GN=DYNC1I2 PE=1 SV=3	Cytoplasmic dynein 1 intermediate chain 2 OS=Mus musculus GN=Dync1i2 PE=1 SV=1	68.479	0.762922	1.3437	0.889933	0.891895	1.08523	1.02387	0.734962	1.46973	0.785768	1.44418	0.0502792	1.63139	0.0321421	0.885244	0.294322
F1S089	Uncharacterized protein	LACTB	Serine beta-lactamase-like protein LACTB, mitochondrial OS=Homo sapiens GN=LACTB PE=1 SV=2	Serine beta-lactamase-like protein LACTB, mitochondrial OS=Mus musculus GN=Lactb PE=1 SV=1	61.826	1.00196	0.995138	1.00265	1.03905	1.03335	0.93482				1.04698	0.389202	0.993864	0.83596	1.05344	0.343559
F1S091	Uncharacterized protein	RAB8B	Ras-related protein Rab-8B OS=Homo sapiens GN=RAB8B PE=1 SV=2	Ras-related protein Rab-8B OS=Mus musculus GN=Rab8b PE=1 SV=1	22.812	1.17056	0.633152	1.16317	1.11271	0.723844	1.14028	1.21182	0.641806	1.16507	0.57627	0.00197319	0.571889	0.00025611	1.00766	0.791166
F1S096	Uncharacterized protein	---	Ubiquitin carboxyl-terminal hydrolase 3 OS=Homo sapiens GN=USP3 PE=1 SV=2	Ubiquitin carboxyl-terminal hydrolase 3 OS=Mus musculus GN=Usp3 PE=2 SV=1	32.99	1.19052	0.783209	1.04743	1.14774	0.83295	1.01198	1.08085	0.872425	1.04076	0.802723	0.00766532	0.727846	0.00194631	1.10288	0.0668943
F1S098	Uncharacterized protein	HERC1	Probable E3 ubiquitin-protein ligase HERC1 OS=Homo sapiens GN=HERC1 PE=1 SV=2	Protein Herc1 OS=Mus musculus GN=Herc1 PE=2 SV=1	531.68	1.14527	0.736346	1.10841	1.07982	0.803741	1.09995				0.697389	0.0603744	0.692146	0.0183373	1.00758	0.840903
F1S0A1	Uncharacterized protein	CSNK1G1	Casein kinase I isoform gamma-1 OS=Homo sapiens GN=CSNK1G1 PE=1 SV=1	Casein kinase I isoform gamma-1 OS=Mus musculus GN=Csnk1g1 PE=1 SV=2	41.67				1.18325	0.695816	1.10038				0.632344		0.588054		1.07532
F1S0A2	Peptidyl-prolyl cis-trans isomerase	---			19.358	0.514511	1.79131	0.697614	0.543751	1.86645	0.663939	0.571703	1.67379	0.711165	2.57225	0.00160778	3.27096	0.000996046	0.786391	0.00266493
F1S0A3	Uncharacterized protein	SNX1	Sorting nexin-1 OS=Homo sapiens GN=SNX1 PE=1 SV=3	Sorting nexin 1 OS=Mus musculus GN=Snx1 PE=2 SV=1	54.041	1.22368	0.580148	1.16378	1.15412	0.633568	1.17879	1.10604	0.732662	1.19672	0.549934	0.0052989	0.558688	0.00109209	0.984331	0.647789
F1S0A9	Uncharacterized protein	ZNF609	Zinc finger protein 609 OS=Homo sapiens GN=ZNF609 PE=1 SV=2	Zinc finger protein 609 OS=Mus musculus GN=Znf609 PE=1 SV=2	150.99	0.965743	1.06976	0.967497				1.05703	0.814457	1.13264	0.897185	0.561761	0.931501	0.684792	0.963161	0.731104
F1S0B4	Uncharacterized protein	---	Pleckstrin homology domain-containing family O member 2 OS=Homo sapiens GN=PLEKHO2 PE=2 SV=1	Pleckstrin homology domain-containing family O member 2 OS=Mus musculus GN=Plekho2 PE=1 SV=1	48.08	1.27341	0.634736	1.08422							0.585431		0.498456		1.17449
F1S0B9	Uncharacterized protein	EIF4E	Eukaryotic translation initiation factor 4E OS=Homo sapiens GN=EIF4E PE=1 SV=2	Eukaryotic translation initiation factor 4E OS=Mus musculus GN=Eif4e PE=1 SV=1	25.079	1.06759	0.843006	1.04808	1.09416	0.820005	1.07996	1.05218	0.9251	1.02694	0.820323	0.0142123	0.805281	0.0135008	1.01868	0.377597
F1S0C0	Methionine aminopeptidase 1	METAP1			43.243	1.04889	0.955038	0.988636	1.03347	0.950004	1.00862	1.02741	0.947968	1.02678	0.943444	0.0315786	0.917434	0.00279628	1.02835	0.104747
F1S0C1	S-(hydroxymethyl)glutathione dehydrogenase	ADH5			39.689	0.899466	1.23465	0.84911	0.963103	1.10891	0.937761	0.785884	1.37195	0.823421	1.42341	0.0249484	1.4029	0.0227431	1.01462	0.849648
F1S0C3	Uncharacterized protein	LYRM2	LYR motif-containing protein 2 OS=Homo sapiens GN=LYRM2 PE=1 SV=1	LYR motif-containing protein 2 OS=Mus musculus GN=Lyrm2 PE=2 SV=1	10.536
F1S0C9	Uncharacterized protein	UBE2J1	Ubiquitin-conjugating enzyme E2 J1 OS=Homo sapiens GN=UBE2J1 PE=1 SV=2	Ubiquitin-conjugating enzyme E2 J1 OS=Mus musculus GN=Ube2j1 PE=1 SV=2	35.132	0.641579	1.56756	0.80842	0.687468	1.55961	0.771343	0.826224	1.24717	0.912537	1.75514	0.0164814	2.0296	0.00820253	0.864772	0.187602
F1S0D4	Uncharacterized protein	RAB3GAP1	Rab3 GTPase-activating protein catalytic subunit OS=Homo sapiens GN=RAB3GAP1 PE=1 SV=3	Rab3 GTPase-activating protein catalytic subunit OS=Mus musculus GN=Rab3gap1 PE=2 SV=4	97.657	1.09181	0.813717	1.08642	1.07063	0.817911	1.0799	1.05519	0.858526	1.02537	0.780201	0.000935233	0.773909	0.000272617	1.00813	0.720571
F1S0D6	Uncharacterized protein	---	R3H domain-containing protein 1 OS=Homo sapiens GN=R3HDM1 PE=1 SV=3	Protein R3hdm1 OS=Mus musculus GN=R3hdm1 PE=2 SV=1	86.619
F1S0D8	Uncharacterized protein	UBXN4	UBX domain-containing protein 4 OS=Homo sapiens GN=UBXN4 PE=1 SV=2	UBX domain-containing protein 4 OS=Mus musculus GN=Ubxn4 PE=1 SV=1	53.802	0.726076	1.53447	0.761436	0.705858	1.58198	0.761784	0.813935	1.41307	0.758623	1.98503	0.00446258	2.01683	0.000509455	0.984234	0.752405
[truncated: 5,608 more rows]

## Sheet: Reproducibility analysis
A1	A2	A3	H1	H2	H3	SA1	SA2	SA3
	0.930776			0.580017			1.43376			Pearson Correlation		A			H			SA
[truncated: 6,200 more rows]

## Sheet: repeat1
Protein accession	Protein description	Gene name	MW [kDa]	Score	Coverage [%]	#Peptides	#PSMs	#Unique peptides	SA1	H1	A1	H1/SA1 Ratio	H1/SA1 P value	H1/A1 Ratio	H1/A1 P value	A1/SA1 Ratio	A1/SA1 P value
[truncated: 5,789 more rows]

[truncated: 2 more sheets: repeat2, repeat3]
