# Supplementary material for: Integrative proteomic and phosphoproteomic analysis of granulosa cells during follicular atresia in porcine
Source: bioRxiv preprint, doi:10.1101/2020.08.31.276436, version 1 (2020-09-01)
Supplement: Supplemental Data [file 276436_file03.zip › Supplemental Data/Table S2--Differentially expressed statistics-Proteomic.xlsx]

## Sheet: Diff distribution
Compared sample name	Up-regulated	Down-regulated
A/SA	12	12
H/A	627	827
H/SA	572	743

## Sheet: HvsSA
Protein accession	Protein description (pig)	H/SA Ratio	Regulated Type	H/SA P value	Gene name	Protein description (human)	Protein description (mouse)	MW [kDa]	Subcellular localization	Biological Process	Cellular Component	Molecular Function	KEGG KO No.	KEGG Gene	KEGG pathway	IPR ID	Domain description
A0A075B7I6	Uncharacterized protein (Fragment)	0.478142	Down	0.0132	---	Ig lambda chain V-IV region Bau OS=Homo sapiens PE=1 SV=1	Ig kappa chain V-III region CBPC 101 OS=Mus musculus PE=1 SV=1	12.329	extracellular			protein binding; binding;				IPR007110; IPR013783; IPR003599; IPR013106;	Immunoglobulin-like domain; Immunoglobulin-like fold; Immunoglobulin subtype; Immunoglobulin V-set domain;
A0A0C3SG01	Apolipoprotein A-I	0.183785	Down	0.000167	APOA1			30.33	extracellular	lipid transport; single-organism process; lipid localization; organic substance transport; primary metabolic process; lipoprotein metabolic process; organic substance metabolic process; establishment of localization; transport; metabolic process; single-organism localization; protein metabolic process; macromolecule metabolic process; localization; macromolecule localization; single-organism tran…	extracellular region;	lipid binding; binding;	K08757	APOA1; apolipoprotein A-I	ssc04977 Vitamin digestion and absorption - Sus scrofa (pig); ssc03320 PPAR signaling pathway - Sus scrofa (pig); ssc04975 Fat digestion and absorption - Sus scrofa (pig); ssc05143 African trypanosomiasis - Sus scrofa (pig);
A0A0R4J8D7	ICT1	1.64772	Up	0.000992	MRPL28			30.1	mitochondria			structural constituent of ribosome; structural molecule activity;	K02902	RP-L28; large subunit ribosomal protein L28	ssc03010 Ribosome - Sus scrofa (pig);
A0A140TAL0	Mannose-1-phosphate guanyltransferase alpha	0.547702	Down	0.008	GMPPA			46.044	mitochondria	biosynthetic process; metabolic process;		nucleotidyltransferase activity; catalytic activity; transferase activity; transferase activity, transferring phosphorus-containing groups;	K00966	GMPP; mannose-1-phosphate guanylyltransferase [EC:2.7.7.13]	ssc00051 Fructose and mannose metabolism - Sus scrofa (pig); ssc00520 Amino sugar and nucleotide sugar metabolism - Sus scrofa (pig); ssc01100 Metabolic pathways - Sus scrofa (pig);	IPR005835; IPR029044;	Nucleotidyl transferase domain; Nucleotide-diphospho-sugar transferases;
A1XQU1	Proteasome subunit beta type-7	3.39508	Up	0.000374	PSMB7			29.98	cytoplasm	proteolysis involved in cellular protein catabolic process; cellular macromolecule catabolic process; cellular protein catabolic process; cellular protein metabolic process; primary metabolic process; cellular metabolic process; organic substance metabolic process; organic substance catabolic process; metabolic process; protein catabolic process; macromolecule catabolic process; cellular macromol…	catalytic complex; proteasome complex; cell part; intracellular; proteasome core complex; macromolecular complex; intracellular part; peptidase complex; cell; protein complex; endopeptidase complex;	endopeptidase activity; threonine-type endopeptidase activity; peptidase activity; threonine-type peptidase activity; catalytic activity; peptidase activity, acting on L-amino acid peptides; hydrolase activity;	K02739	PSMB7; 20S proteasome subunit beta 2 [EC:3.4.25.1]	ssc03050 Proteasome - Sus scrofa (pig);	IPR024689; IPR029055;	Proteasome beta subunit, C-terminal; Nucleophile aminohydrolases, N-terminal;
A1XQU3	60S ribosomal protein L14	0.399879	Down	0.00289	RPL14			23.33	mitochondria	peptide metabolic process; peptide biosynthetic process; cellular protein metabolic process; nitrogen compound metabolic process; biosynthetic process; cellular amide metabolic process; primary metabolic process; organonitrogen compound biosynthetic process; organic substance biosynthetic process; cellular metabolic process; cellular biosynthetic process; organic substance metabolic process; meta…	ribosome; organelle; intracellular organelle; intracellular non-membrane-bounded organelle; cell part; intracellular; cytoplasm; macromolecular complex; intracellular part; ribonucleoprotein complex; cell; intracellular ribonucleoprotein complex; cytoplasmic part; non-membrane-bounded organelle;	structural constituent of ribosome; structural molecule activity;	K02875	RP-L14e; large subunit ribosomal protein L14e	ssc03010 Ribosome - Sus scrofa (pig);	IPR008991; IPR002784; IPR014722;	Translation protein SH3-like domain; Ribosomal protein L14e domain; Ribosomal protein L2 domain 2;
A1XQU5	60S ribosomal protein L27	2.4152	Up	0.00997	RPL27			15.798	mitochondria	peptide metabolic process; peptide biosynthetic process; cellular protein metabolic process; nitrogen compound metabolic process; biosynthetic process; cellular amide metabolic process; primary metabolic process; organonitrogen compound biosynthetic process; organic substance biosynthetic process; cellular metabolic process; cellular biosynthetic process; organic substance metabolic process; meta…	ribosome; organelle; intracellular organelle; intracellular non-membrane-bounded organelle; cell part; intracellular; cytoplasm; macromolecular complex; intracellular part; ribonucleoprotein complex; cell; intracellular ribonucleoprotein complex; cytoplasmic part; non-membrane-bounded organelle;	structural constituent of ribosome; structural molecule activity;	K02901	RP-L27e; large subunit ribosomal protein L27e	ssc03010 Ribosome - Sus scrofa (pig);	IPR008991; IPR014722; IPR005824;	Translation protein SH3-like domain; Ribosomal protein L2 domain 2; KOW;
A2BD09	Olfactomedin-like protein 2A	0.338007	Down	0.00226	OLFML2A			72.527	extracellular							IPR003112;	Olfactomedin-like domain;
A2TEQ2	Poliovirus receptor related 2	2.37383	Up	0.00919	prr2			51.525	extracellular			protein binding; binding;	K06531	PVRL2; poliovirus receptor-related protein 2	ssc04520 Adherens junction - Sus scrofa (pig); ssc05168 Herpes simplex infection - Sus scrofa (pig); ssc04514 Cell adhesion molecules (CAMs) - Sus scrofa (pig);	IPR007110; IPR013783; IPR013162; IPR013106; IPR003599;	Immunoglobulin-like domain; Immunoglobulin-like fold; CD80-like, immunoglobulin C2-set; Immunoglobulin V-set domain; Immunoglobulin subtype;
A3EX84	Galectin	0.244436	Down	0.00114	LGALS3			27.214	cytoplasm			carbohydrate binding; binding;	K06831			IPR001079; IPR013320;	Galectin, carbohydrate recognition domain; Concanavalin A-like lectin/glucanase domain;
A4Z6H1	Adenylosuccinate synthetase isozyme 2	0.484068	Down	0.00332	ADSS			50.14	cytoplasm	nucleoside metabolic process; purine nucleoside metabolic process; purine ribonucleoside monophosphate metabolic process; nucleotide metabolic process; single-organism process; purine ribonucleoside biosynthetic process; nucleoside biosynthetic process; biosynthetic process; ribonucleoside monophosphate biosynthetic process; cellular metabolic process; phosphate-containing compound metabolic proc…	intracellular part; cell; cell part; intracellular; cytoplasm;	nucleoside phosphate binding; ligase activity; nucleoside binding; ion binding; nucleotide binding; ligase activity, forming carbon-nitrogen bonds; organic cyclic compound binding; heterocyclic compound binding; ribonucleoside binding; carbohydrate derivative binding; catalytic activity; ribonucleotide binding; binding; purine ribonucleoside binding; anion binding; purine ribonucleotide binding; …	K01939	purA; adenylosuccinate synthase [EC:6.3.4.4]	ssc00230 Purine metabolism - Sus scrofa (pig); ssc00250 Alanine, aspartate and glutamate metabolism - Sus scrofa (pig); ssc01100 Metabolic pathways - Sus scrofa (pig);	IPR027417;	P-loop containing nucleoside triphosphate hydrolase;
A5D9L6	Apolipoprotein M	0.228679	Down	0.00319	APOM			13.131	mitochondria							IPR011038;	Calycin-like;
A5GFQ0	60S ribosomal protein L7-like 1	0.390993	Down	0.000494	RPL7L1			28.724	cytoplasm							IPR012988; IPR016082;	Ribosomal protein L30, N-terminal; Ribosomal protein L30, ferredoxin-like fold domain;
A5GFQ5	Protein canopy homolog 3	1.95831	Up	7e-05	CNPY3			31.71	extracellular							IPR021852;	Domain of unknown function DUF3456;
A5GFT5	Aminopeptidase-like 1	1.77284	Up	0.00734	NPEPL1			55.655	nucleus	proteolysis; metabolic process; macromolecule metabolic process; protein metabolic process; primary metabolic process; organic substance metabolic process;	intracellular part; cell; intracellular; cell part; cytoplasm;	peptidase activity; exopeptidase activity; transition metal ion binding; catalytic activity; binding; metalloexopeptidase activity; ion binding; cation binding; peptidase activity, acting on L-amino acid peptides; metal ion binding; metallopeptidase activity; hydrolase activity; aminopeptidase activity; manganese ion binding;	K09611			IPR000819;	Peptidase M17, leucyl aminopeptidase, C-terminal;
A5GFU6	GNAS complex locus	0.620381	Down	0.000781	GNAS			44.179	cytoplasm	G-protein coupled receptor signaling pathway; regulation of cellular process; single organism signaling; cellular response to stimulus; signal transduction; regulation of biological process; cell communication; single-organism process; signaling; response to stimulus; cellular process; biological regulation;		nucleoside phosphate binding; G-protein beta/gamma-subunit complex binding; hydrolase activity, acting on acid anhydrides; hydrolase activity; protein binding; signal transducer activity; heterocyclic compound binding; organic cyclic compound binding; pyrophosphatase activity; catalytic activity; ribonucleotide binding; binding; GTPase activity; purine ribonucleoside binding; anion binding; hydro…	K04633	GNAL; guanine nucleotide-binding protein G(olf) subunit alpha	ssc05146 Amoebiasis - Sus scrofa (pig); ssc04728 Dopaminergic synapse - Sus scrofa (pig); ssc04020 Calcium signaling pathway - Sus scrofa (pig); ssc05142 Chagas disease (American trypanosomiasis) - Sus scrofa (pig); ssc05012 Parkinson's disease - Sus scrofa (pig); ssc04740 Olfactory transduction - Sus scrofa (pig);	IPR027417; IPR011025;	P-loop containing nucleoside triphosphate hydrolase; G protein alpha subunit, helical insertion;
A5GFW0	Orthologue of H. sapiens chromosome 20 open reading frame 108 (C20orf108)	1.69345	Up	0.00444	C17H20orf108			20.456	extracellular							IPR009688;	Domain of unknown function DUF1279;
A5GFX7	Cathepsin Z	0.496887	Down	0.0146	CTSZ			33.791	extracellular	proteolysis; metabolic process; macromolecule metabolic process; protein metabolic process; primary metabolic process; organic substance metabolic process;		peptidase activity, acting on L-amino acid peptides; cysteine-type peptidase activity; hydrolase activity; peptidase activity; catalytic activity;	K08568	CTSZ; cathepsin X [EC:3.4.18.1]	ssc04142 Lysosome - Sus scrofa (pig); ssc04210 Apoptosis - Sus scrofa (pig);	IPR000668;	Peptidase C1A, papain C-terminal;
A5GHK3	Prefoldin subunit 4	2.28426	Up	0.0164	PFDN4			15.27	cytoplasm	protein folding; cellular process;	prefoldin complex; macromolecular complex; protein complex;	protein binding; unfolded protein binding; binding;	K09550
A5GHL0	"RAB22A, member RAS oncogene family"	0.534275	Down	0.0144	RAB22A			21.794	cytoplasm	regulation of cellular process; single organism signaling; cellular response to stimulus; signal transduction; regulation of biological process; cell communication; intracellular signal transduction; single-organism process; small GTPase mediated signal transduction; signaling; response to stimulus; cellular process; biological regulation;		nucleoside phosphate binding; nucleoside binding; ion binding; nucleotide binding; organic cyclic compound binding; heterocyclic compound binding; ribonucleoside binding; carbohydrate derivative binding; ribonucleotide binding; binding; purine ribonucleoside binding; anion binding; purine ribonucleotide binding; purine nucleoside binding; guanyl ribonucleotide binding; guanyl nucleotide binding; …	K07891	RAB22; Ras-related protein Rab-22	ssc04144 Endocytosis - Sus scrofa (pig);	IPR005225; IPR027417;	Small GTP-binding protein domain; P-loop containing nucleoside triphosphate hydrolase;
A6M928	Eukaryotic translation initiation factor 4A isoform 1	0.620408	Down	0.00361	EIF4A1			46.153	nucleus			ATP binding; nucleoside phosphate binding; nucleoside binding; ion binding; nucleotide binding; organic cyclic compound binding; heterocyclic compound binding; ribonucleoside binding; carbohydrate derivative binding; ribonucleotide binding; binding; nucleic acid binding; purine ribonucleoside binding; anion binding; purine ribonucleotide binding; adenyl ribonucleotide binding; adenyl nucleotide b…	K03257	EIF4A; translation initiation factor 4A	ssc03013 RNA transport - Sus scrofa (pig);	IPR011545; IPR014014; IPR014001; IPR027417; IPR001650;	DEAD/DEAH box helicase domain; RNA helicase, DEAD-box type, Q motif; Helicase superfamily 1/2, ATP-binding domain; P-loop containing nucleoside triphosphate hydrolase; Helicase, C-terminal;
A6N8P5	Multiprotein bridging factor 1	3.8131	Up	8.28e-05	MBF1			16.396	mitochondria			organic cyclic compound binding; heterocyclic compound binding; DNA binding; sequence-specific DNA binding; binding; nucleic acid binding;	K03627			IPR010982; IPR013729; IPR001387;	Lambda repressor-like, DNA-binding domain; Multiprotein bridging factor 1, N-terminal; Cro/C1-type helix-turn-helix domain;
A7XNM3	Stanniocalcin 1	0.250905	Down	0.0353	STC1			27.557	extracellular		extracellular region;	protein binding; receptor binding; binding; hormone activity;
A7XP20	B-cell CLL/lymphoma 10	0.512167	Down	4.66e-05	BCL10			26.202	cytoplasm	regulation of cellular process; regulation of programmed cell death; regulation of cell death; regulation of biological process; regulation of apoptotic process; biological regulation;			K07368	BCL10; B-cell CLL/lymphoma 10	ssc05152 Tuberculosis - Sus scrofa (pig); ssc04064 NF-kappa B signaling pathway - Sus scrofa (pig); ssc04660 T cell receptor signaling pathway - Sus scrofa (pig); ssc04662 B cell receptor signaling pathway - Sus scrofa (pig);	IPR011029; IPR001315;	Death-like domain; CARD domain;
B0LXP3	NF-kappaB transcription factor p65 subunit	0.635033	Down	9.43e-06	RELA			60.383	nucleus	regulation of cellular process; regulation of gene expression; regulation of transcription, DNA-templated; regulation of cellular biosynthetic process; regulation of primary metabolic process; regulation of macromolecule metabolic process; regulation of nucleobase-containing compound metabolic process; regulation of macromolecule biosynthetic process; regulation of cellular metabolic process; reg…	organelle; intracellular membrane-bounded organelle; intracellular organelle; nucleus; cell part; intracellular; cytoplasm; intracellular part; membrane-bounded organelle; cell;	organic cyclic compound binding; heterocyclic compound binding; DNA binding; binding; nucleic acid binding transcription factor activity; nucleic acid binding; protein binding; transcription factor activity, sequence-specific DNA binding;	K04735	RELA; transcription factor p65	ssc04917 Prolactin signaling pathway - Sus scrofa (pig); ssc05145 Toxoplasmosis - Sus scrofa (pig); ssc05212 Pancreatic cancer - Sus scrofa (pig); ssc04659 Th17 cell differentiation - Sus scrofa (pig); ssc04024 cAMP signaling pathway - Sus scrofa (pig); ssc05222 Small cell lung cancer - Sus scrofa (pig); ssc04722 Neurotrophin signaling pathway - Sus scrofa (pig); ssc04620 Toll-like receptor signa…	IPR013783; IPR008967; IPR014756; IPR032397; IPR011539; IPR033926; IPR002909;	Immunoglobulin-like fold; p53-like transcription factor, DNA-binding; Immunoglobulin E-set; Rel homology dimerisation domain; Rel homology domain (RHD), DNA-binding domain; NFkappaB IPT domain; IPT domain;
B3SP85	Gamma-interferon-inducible-lysosomal thiol reductase	0.405363	Down	0.0127	IFI30			27.614	extracellular				K08059	IFI30; interferon, gamma-inducible protein 30	ssc04612 Antigen processing and presentation - Sus scrofa (pig);
B4F450	Ubiquitin-like protein 5	0.444321	Down	0.00435	UBL5			8.5468	extracellular			protein binding; binding;	K13113			IPR029071; IPR000626;	Ubiquitin-related domain; Ubiquitin domain;
B6CVL5	High mobility group AT-hook 1 transcript variant 2	0.587201	Down	0.0172	HMGA1			10.649	nucleus	regulation of cellular process; regulation of gene expression; regulation of transcription, DNA-templated; regulation of cellular biosynthetic process; regulation of primary metabolic process; regulation of macromolecule metabolic process; regulation of nucleobase-containing compound metabolic process; regulation of macromolecule biosynthetic process; regulation of cellular metabolic process; reg…	intracellular organelle; intracellular non-membrane-bounded organelle; intracellular organelle part; intracellular part; cell; organelle part; chromosomal part; non-membrane-bounded organelle; intracellular membrane-bounded organelle; organelle; nucleus; chromatin; intracellular; cell part; chromosome; membrane-bounded organelle;	organic cyclic compound binding; heterocyclic compound binding; DNA binding; binding; nucleic acid binding;	K09282
B6DZ39	APPL2	0.520764	Down	0.0016	appl2			74.161	cytoplasm			protein binding; binding;	K20132			IPR011993; IPR006020; IPR001849;	PH domain-like; PTB/PI domain; Pleckstrin homology domain;
B6E241	Growth factor receptor bound protein 2	1.60144	Up	9.3e-05	GRB2			25.206	cytoplasm			protein binding; binding;	K04364	GRB2; growth factor receptor-binding protein 2	ssc01521 EGFR tyrosine kinase inhibitor resistance - Sus scrofa (pig); ssc05213 Endometrial cancer - Sus scrofa (pig); ssc04917 Prolactin signaling pathway - Sus scrofa (pig); ssc05231 Choline metabolism in cancer - Sus scrofa (pig); ssc04510 Focal adhesion - Sus scrofa (pig); ssc05205 Proteoglycans in cancer - Sus scrofa (pig); ssc04540 Gap junction - Sus scrofa (pig); ssc04722 Neurotrophin sign…	IPR001452; IPR000980;	SH3 domain; SH2 domain;
B8XH67	Na(+)/H(+) exchange regulatory cofactor NHE-RF	1.95462	Up	0.00152	SLC9A3R1			39.304	cytoplasm			protein complex scaffold; protein binding; structural molecule activity; binding;	K13365	SLC9A3R1; Na(+)/H(+) exchange regulatory cofactor NHE-RF1	ssc04530 Tight junction - Sus scrofa (pig);	IPR015098; IPR001478;	EBP50, C-terminal; PDZ domain;
B8XSJ7	Mitogen-activated protein kinase-activated protein kinase 3	0.610272	Down	0.00607	MAPKAPK3			43.297	cytoplasm	phosphorylation; cellular protein metabolic process; primary metabolic process; cellular metabolic process; phosphate-containing compound metabolic process; organic substance metabolic process; metabolic process; protein phosphorylation; phosphorus metabolic process; cellular macromolecule metabolic process; cellular protein modification process; protein metabolic process; macromolecule metabolic…		ATP binding; nucleoside phosphate binding; phosphotransferase activity, alcohol group as acceptor; nucleoside binding; ion binding; protein kinase activity; nucleotide binding; organic cyclic compound binding; heterocyclic compound binding; ribonucleoside binding; carbohydrate derivative binding; kinase activity; catalytic activity; ribonucleotide binding; binding; purine ribonucleoside binding; …	K04444	MAPKAPK3; mitogen-activated protein kinase-activated protein kinase 3 [EC:2.7.11.1]	ssc04010 MAPK signaling pathway - Sus scrofa (pig); ssc04370 VEGF signaling pathway - Sus scrofa (pig);	IPR000719; IPR027442; IPR011009;	Protein kinase domain; MAP kinase activated protein kinase, C-terminal domain; Protein kinase-like domain;
C0SW08	Cell division cycle 2	2.08645	Up	0.000202	CDC2			34.079	cytoplasm	phosphorylation; cellular protein metabolic process; primary metabolic process; cellular metabolic process; phosphate-containing compound metabolic process; organic substance metabolic process; metabolic process; protein phosphorylation; phosphorus metabolic process; cellular macromolecule metabolic process; cellular protein modification process; protein metabolic process; macromolecule metabolic…		ATP binding; nucleoside phosphate binding; phosphotransferase activity, alcohol group as acceptor; nucleoside binding; ion binding; protein kinase activity; nucleotide binding; organic cyclic compound binding; heterocyclic compound binding; ribonucleoside binding; carbohydrate derivative binding; kinase activity; catalytic activity; ribonucleotide binding; binding; purine ribonucleoside binding; …	K02087	CDK1; cyclin-dependent kinase 1 [EC:2.7.11.22 2.7.11.23]	ssc05169 Epstein-Barr virus infection - Sus scrofa (pig); ssc04540 Gap junction - Sus scrofa (pig); ssc04914 Progesterone-mediated oocyte maturation - Sus scrofa (pig); ssc04114 Oocyte meiosis - Sus scrofa (pig); ssc05168 Herpes simplex infection - Sus scrofa (pig); ssc04115 p53 signaling pathway - Sus scrofa (pig); ssc05203 Viral carcinogenesis - Sus scrofa (pig); ssc04110 Cell cycle - Sus scrof…	IPR000719; IPR011009;	Protein kinase domain; Protein kinase-like domain;
C3UP60	MAL2 proteolipid protein	1.53888	Up	0.00591	MAL2			19.048	plasma membrane		membrane;					IPR008253;	Marvel domain;
C4MXZ1	ADP-ribosylation factor 1	0.600723	Down	6.12e-05	ARF1			20.697	cytoplasm	regulation of cellular process; single organism signaling; cellular response to stimulus; signal transduction; regulation of biological process; cell communication; intracellular signal transduction; single-organism process; small GTPase mediated signal transduction; signaling; response to stimulus; cellular process; biological regulation;	cell; intracellular; cell part;	nucleoside phosphate binding; nucleoside binding; ion binding; nucleotide binding; organic cyclic compound binding; heterocyclic compound binding; ribonucleoside binding; carbohydrate derivative binding; ribonucleotide binding; binding; purine ribonucleoside binding; anion binding; purine ribonucleotide binding; purine nucleoside binding; guanyl ribonucleotide binding; guanyl nucleotide binding; …	K07937	ARF1; ADP-ribosylation factor 1	ssc05134 Legionellosis - Sus scrofa (pig); ssc04144 Endocytosis - Sus scrofa (pig); ssc04072 Phospholipase D signaling pathway - Sus scrofa (pig);	IPR005225; IPR027417;	Small GTP-binding protein domain; P-loop containing nucleoside triphosphate hydrolase;
C5H0C6	Ubiquitin thioesterase	0.630204	Down	0.00244	OTUB1			31.284	cytoplasm	protein modification by small protein removal; cellular protein metabolic process; protein modification by small protein conjugation or removal; protein deubiquitination; primary metabolic process; cellular metabolic process; organic substance metabolic process; metabolic process; cellular macromolecule metabolic process; proteolysis; cellular protein modification process; protein metabolic proce…		hydrolase activity; catalytic activity;	K09602			IPR003323;	OTU domain;
D0G6X4	Farnesyl diphosphate synthase	0.579768	Down	0.00518	FDPS			48.599	mitochondria	isoprenoid metabolic process; single-organism biosynthetic process; single-organism cellular process; single-organism process; biosynthetic process; cellular lipid metabolic process; primary metabolic process; organic substance biosynthetic process; cellular metabolic process; cellular biosynthetic process; organic substance metabolic process; lipid biosynthetic process; isoprenoid biosynthetic p…			K00787	FDPS; farnesyl diphosphate synthase [EC:2.5.1.1 2.5.1.10]	ssc05164 Influenza A - Sus scrofa (pig); ssc00900 Terpenoid backbone biosynthesis - Sus scrofa (pig); ssc05166 HTLV-I infection - Sus scrofa (pig); ssc01100 Metabolic pathways - Sus scrofa (pig);	IPR008949;	Isoprenoid synthase domain;
D0G7F6	Triosephosphate isomerase	2.84612	Up	0.000141	TPI1			26.667	cytoplasm	ATP generation from ADP; nucleoside metabolic process; purine nucleoside metabolic process; nucleoside diphosphate phosphorylation; ADP metabolic process; pyridine nucleotide metabolic process; glycolytic process; purine ribonucleoside monophosphate metabolic process; nucleotide metabolic process; single-organism process; ribonucleoside diphosphate metabolic process; nucleotide phosphorylation; p…		isomerase activity; intramolecular oxidoreductase activity; triose-phosphate isomerase activity; catalytic activity; intramolecular oxidoreductase activity, interconverting aldoses and ketoses;	K01803	TPI; triosephosphate isomerase (TIM) [EC:5.3.1.1]	ssc00051 Fructose and mannose metabolism - Sus scrofa (pig); ssc00010 Glycolysis / Gluconeogenesis - Sus scrofa (pig); ssc00562 Inositol phosphate metabolism - Sus scrofa (pig); ssc01200 Carbon metabolism - Sus scrofa (pig); ssc01230 Biosynthesis of amino acids - Sus scrofa (pig); ssc01100 Metabolic pathways - Sus scrofa (pig);	IPR013785;	Aldolase-type TIM barrel;
D2SW95	Coatomer subunit beta	0.63788	Down	0.000824	COPB1			107.12	cytoskeleton	establishment of protein localization; transport; intracellular transport; cellular macromolecule localization; establishment of localization in cell; vesicle-mediated transport; intracellular protein transport; organic substance transport; protein localization; macromolecule localization; cellular protein localization; localization; protein transport; establishment of localization; cellular loca…	membrane; cytoplasmic vesicle; organelle membrane; membrane protein complex; COPI-coated vesicle; vesicle; Golgi-associated vesicle membrane; cytoplasm; cytoplasmic vesicle part; macromolecular complex; intracellular part; vesicle coat; COPI-coated vesicle membrane; cell; organelle part; coated vesicle membrane; COPI vesicle coat; membrane part; intracellular; cell part; whole membrane; Golgi app…	structural molecule activity; binding;	K17301			IPR011710; IPR011989; IPR016024; IPR029446; IPR002553;	Coatomer beta subunit, C-terminal; Armadillo-like helical; Armadillo-type fold; Coatomer beta subunit, appendage platform domain; Clathrin/coatomer adaptor, adaptin-like, N-terminal;
D3K5N3	Midkine	0.274295	Down	0.00631	MDK			15.597	extracellular			growth factor activity; protein binding; receptor binding; binding;	K06828			IPR020089; IPR020090; IPR020091;	Pleiotrophin/Midkine, N-terminal domain; Pleiotrophin/Midkine, C-terminal domain; Pleiotrophin/Midkine disulphide-rich domain;
D3Y264	Apolipoprotein C-II	0.281127	Down	0.00248	APOC2			11.138	extracellular	lipid transport; single-organism process; lipid localization; organic substance transport; primary metabolic process; organic substance metabolic process; establishment of localization; transport; metabolic process; single-organism localization; single-organism metabolic process; localization; macromolecule localization; single-organism transport; lipid metabolic process;	macromolecular complex; extracellular region part; extracellular space; chylomicron; protein-lipid complex; extracellular region; lipoprotein particle; plasma lipoprotein particle;	molecular function regulator; enzyme regulator activity; enzyme activator activity;				IPR023121;	ApoC-II domain;
D7RA36	Autophagy related 2-like protein B	2.24718	Up	0.000129	ATG2B			232.12	nucleus				K17906	ATG2; autophagy-related protein 2	ssc04140 Autophagy - animal - Sus scrofa (pig);	IPR026885; IPR015412; IPR026854;	Autophagy-related protein 2 CAD motif; Autophagy-related, C-terminal; Vacuolar protein sorting-associated protein 13, N-terminal domain;
E0YLM4	Mesencephalic astrocyte-derived neurotrophic factor	2.87138	Up	0.00274	MANF			20.359	extracellular							IPR011001;	Saposin-like;
E1CAJ6	Protein disulfide isomerase P5	1.65513	Up	8.59e-05	pdi-p5			48.074	extracellular	regulation of cellular process; homeostatic process; regulation of biological quality; regulation of biological process; cell redox homeostasis; single-organism cellular process; cellular homeostasis; single-organism process; cellular process; biological regulation;		isomerase activity; catalytic activity;	K09584	PDIA6; protein disulfide-isomerase A6 [EC:5.3.4.1]	ssc04141 Protein processing in endoplasmic reticulum - Sus scrofa (pig);	IPR005788; IPR013766; IPR012336;	Disulphide isomerase; Thioredoxin domain; Thioredoxin-like fold;
E7CXS0	Low density lipoprotein receptor-related protein 8	4.08048	Up	0.00329	ApoER2			105.01	plasma membrane			cation binding; metal ion binding; protein binding; calcium ion binding; binding; ion binding;	K20052			IPR001881; IPR000742; IPR011042;	EGF-like calcium-binding domain; EGF-like domain; Six-bladed beta-propeller, TolB-like;
E7CXS1	Uncharacterized protein	2.70549	Up	0.0151	Vldlr	Very low-density lipoprotein receptor OS=Homo sapiens GN=VLDLR PE=1 SV=1	Very low-density lipoprotein receptor OS=Mus musculus GN=Vldlr PE=2 SV=1	93.306	extracellular			cation binding; metal ion binding; protein binding; calcium ion binding; binding; ion binding;	K20053			IPR001881; IPR000742; IPR011042;	EGF-like calcium-binding domain; EGF-like domain; Six-bladed beta-propeller, TolB-like;
F1RF19	Uncharacterized protein	1.52419	Up	0.0151	---	E3 ubiquitin-protein ligase AMFR OS=Homo sapiens GN=AMFR PE=1 SV=2	E3 ubiquitin-protein ligase AMFR OS=Mus musculus GN=Amfr PE=1 SV=2	32.927	nucleus			protein binding; binding;	K10636	AMFR; autocrine motility factor receptor [EC:2.3.2.27]	ssc04141 Protein processing in endoplasmic reticulum - Sus scrofa (pig);	IPR013083; IPR003892;	Zinc finger, RING/FYVE/PHD-type; Ubiquitin system component Cue;
F1RF36	Uncharacterized protein	6.67944	Up	9.29e-06	ADGRG1	G-protein coupled receptor 56 OS=Homo sapiens GN=GPR56 PE=1 SV=2	G-protein coupled receptor 56 OS=Mus musculus GN=Gpr56 PE=1 SV=1	72.557	plasma membrane	G-protein coupled receptor signaling pathway; regulation of cellular process; single organism signaling; cellular response to stimulus; signal transduction; regulation of biological process; cell communication; cell surface receptor signaling pathway; single-organism process; signaling; response to stimulus; cellular process; biological regulation;	intrinsic component of membrane; membrane; integral component of membrane; membrane part;	signaling receptor activity; molecular transducer activity; receptor activity; G-protein coupled receptor activity; transmembrane signaling receptor activity; signal transducer activity; transmembrane receptor activity;	K08450			IPR017981; IPR000203;	GPCR, family 2-like; GPS motif;
F1RF47	Uncharacterized protein	0.637153	Down	0.0204	JMY	Junction-mediating and -regulatory protein OS=Homo sapiens GN=JMY PE=1 SV=2	Junction-mediating and -regulatory protein OS=Mus musculus GN=Jmy PE=1 SV=1	73.897	nucleus			actin binding; protein binding; cytoskeletal protein binding; binding;				IPR031738; IPR003124;	JMY/WHAMM, middle domain; WH2 domain;
F1RFA5	Uncharacterized protein	1.62253	Up	0.00113	PGP	Phosphoglycolate phosphatase OS=Homo sapiens GN=PGP PE=1 SV=1	Phosphoglycolate phosphatase OS=Mus musculus GN=Pgp PE=2 SV=1	31.959	mitochondria	metabolic process;		hydrolase activity; catalytic activity; phosphoric ester hydrolase activity; phosphatase activity; hydrolase activity, acting on ester bonds;	K19269	PGP; phosphoglycolate phosphatase [EC:3.1.3.18 3.1.3.48]	ssc00630 Glyoxylate and dicarboxylate metabolism - Sus scrofa (pig); ssc01200 Carbon metabolism - Sus scrofa (pig); ssc01100 Metabolic pathways - Sus scrofa (pig);	IPR023215; IPR023214;	Nitrophenylphosphatase-like domain; HAD-like domain;
F1RFE3	Uncharacterized protein	0.488539	Down	0.000681	LCMT1	Leucine carboxyl methyltransferase 1 OS=Homo sapiens GN=LCMT1 PE=1 SV=2	Leucine carboxyl methyltransferase 1 OS=Mus musculus GN=Lcmt1 PE=2 SV=1	38.143	nucleus	metabolic process; methylation;		transferase activity, transferring one-carbon groups; methyltransferase activity; catalytic activity; transferase activity;	K18203			IPR029063;	S-adenosyl-L-methionine-dependent methyltransferase;
F1RFI8	Uncharacterized protein	2.12777	Up	5.34e-05	EWSR1	RNA-binding protein EWS OS=Homo sapiens GN=EWSR1 PE=1 SV=1	RNA-binding protein EWS OS=Mus musculus GN=Ewsr1 PE=2 SV=1	63.48	nucleus			organic cyclic compound binding; heterocyclic compound binding; nucleoside phosphate binding; transition metal ion binding; binding; nucleic acid binding; ion binding; metal ion binding; cation binding; nucleotide binding; zinc ion binding; small molecule binding;	K13209	EWSR1; RNA-binding protein EWS	ssc05202 Transcriptional misregulation in cancer - Sus scrofa (pig);	IPR000504; IPR012677; IPR001876;	RNA recognition motif domain; Nucleotide-binding alpha-beta plait domain; Zinc finger, RanBP2-type;
F1RFM7	Uncharacterized protein	0.546978	Down	0.00478	AIMP2	Aminoacyl tRNA synthase complex-interacting multifunctional protein 2 OS=Homo sapiens GN=AIMP2 PE=1 SV=2	Aminoacyl tRNA synthase complex-interacting multifunctional protein 2 OS=Mus musculus GN=Aimp2 PE=1 SV=2	35.155	cytoplasm				K15438			IPR004046; IPR010987; IPR031889;	Glutathione S-transferase, C-terminal; Glutathione S-transferase, C-terminal-like; AIMP2, lysyl-tRNA synthetase binding domain;
F1RFN9	Fascin	0.524033	Down	0.000202	FSCN1			54.64	cytoplasm			actin filament binding; protein binding, bridging; cytoskeletal protein binding; binding; macromolecular complex binding; actin binding; binding, bridging; protein binding; protein complex binding;	K17455			IPR022768; IPR008999;	Fascin domain; Actin cross-linking;
F1RFQ7	GTP-binding nuclear protein Ran	0.485064	Down	0.00477	RAN			24.423	cytoplasm	regulation of cellular process; single organism signaling; cellular response to stimulus; intracellular transport; intracellular signal transduction; single-organism process; nuclear transport; organic substance transport; small GTPase mediated signal transduction; signaling; response to stimulus; protein transport; establishment of localization; cellular localization; transport; establishment of…		nucleoside phosphate binding; nucleoside binding; ion binding; hydrolase activity, acting on acid anhydrides; hydrolase activity; nucleotide binding; nucleoside-triphosphatase activity; organic cyclic compound binding; heterocyclic compound binding; ribonucleoside binding; carbohydrate derivative binding; pyrophosphatase activity; catalytic activity; ribonucleotide binding; binding; GTPase activi…	K07936	RAN; GTP-binding nuclear protein Ran	ssc03013 RNA transport - Sus scrofa (pig); ssc05169 Epstein-Barr virus infection - Sus scrofa (pig); ssc05166 HTLV-I infection - Sus scrofa (pig); ssc03008 Ribosome biogenesis in eukaryotes - Sus scrofa (pig);	IPR005225; IPR027417;	Small GTP-binding protein domain; P-loop containing nucleoside triphosphate hydrolase;
F1RFV5	Proteasome subunit beta type	3.70119	Up	0.000828	PSMB6			25.692	cyto_nucl	proteolysis involved in cellular protein catabolic process; cellular macromolecule catabolic process; cellular protein catabolic process; cellular protein metabolic process; primary metabolic process; cellular metabolic process; organic substance metabolic process; organic substance catabolic process; metabolic process; protein catabolic process; macromolecule catabolic process; cellular macromol…	catalytic complex; proteasome complex; cell part; intracellular; proteasome core complex; macromolecular complex; intracellular part; peptidase complex; cell; protein complex; endopeptidase complex;	endopeptidase activity; threonine-type endopeptidase activity; peptidase activity; threonine-type peptidase activity; catalytic activity; peptidase activity, acting on L-amino acid peptides; hydrolase activity;	K02738	PSMB6; 20S proteasome subunit beta 1 [EC:3.4.25.1]	ssc03050 Proteasome - Sus scrofa (pig);	IPR029055;	Nucleophile aminohydrolases, N-terminal;
F1RFY3	Sperm-associated antigen 7	2.14525	Up	0.0109	SPAG7			26.076	nucleus			organic cyclic compound binding; heterocyclic compound binding; binding; nucleic acid binding;				IPR001374; IPR034068;	R3H domain; Sperm-associated antigen 7, R3H domain;
F1RG15	Uncharacterized protein	0.571469	Down	0.032	MAPK8IP3	C-Jun-amino-terminal kinase-interacting protein 3 OS=Homo sapiens GN=MAPK8IP3 PE=1 SV=3	C-Jun-amino-terminal kinase-interacting protein 3 OS=Mus musculus GN=Mapk8ip3 PE=1 SV=1	147.52	nucleus			protein binding; binding;	K04436	MAPK8IP3; mitogen-activated protein kinase 8 interacting protein 3	ssc04010 MAPK signaling pathway - Sus scrofa (pig);	IPR019143; IPR032486; IPR017986; IPR015943;	JNK/Rab-associated protein-1, N-terminal; JNK-interacting protein, leucine zipper II; WD40-repeat-containing domain; WD40/YVTN repeat-like-containing domain;
F1RG62	Uncharacterized protein	2.11602	Up	0.00271	DCTPP1	dCTP pyrophosphatase 1 OS=Homo sapiens GN=DCTPP1 PE=1 SV=1	dCTP pyrophosphatase 1 OS=Mus musculus GN=Dctpp1 PE=1 SV=1	18.498	nucleus			nucleoside-triphosphate diphosphatase activity; hydrolase activity, acting on acid anhydrides; hydrolase activity; pyrophosphatase activity; hydrolase activity, acting on acid anhydrides, in phosphorus-containing anhydrides; catalytic activity;	K16904	DCTPP1; dCTP diphosphatase [EC:3.6.1.12]	ssc00240 Pyrimidine metabolism - Sus scrofa (pig); ssc01100 Metabolic pathways - Sus scrofa (pig);
F1RG84	Uncharacterized protein	0.650385	Down	0.00168	SETD1A	Histone-lysine N-methyltransferase SETD1A OS=Homo sapiens GN=SETD1A PE=1 SV=3	Protein Setd1a OS=Mus musculus GN=Setd1a PE=4 SV=1	168.33	nucleus			organic cyclic compound binding; heterocyclic compound binding; nucleoside phosphate binding; binding; nucleic acid binding; protein binding; nucleotide binding; small molecule binding;	K11422	SETD1; histone-lysine N-methyltransferase SETD1 [EC:2.1.1.43]	ssc00310 Lysine degradation - Sus scrofa (pig);	IPR024657; IPR001214; IPR000504; IPR003616; IPR012677;	COMPASS complex Set1 subunit, N-SET domain; SET domain; RNA recognition motif domain; Post-SET domain; Nucleotide-binding alpha-beta plait domain;
F1RGA7	Uncharacterized protein	0.636564	Down	0.000589	SART3	Squamous cell carcinoma antigen recognized by T-cells 3 OS=Homo sapiens GN=SART3 PE=1 SV=1	Squamous cell carcinoma antigen recognized by T-cells 3 OS=Mus musculus GN=Sart3 PE=2 SV=1	109.29	nucleus	RNA processing; cellular aromatic compound metabolic process; organic cyclic compound metabolic process; nitrogen compound metabolic process; primary metabolic process; cellular metabolic process; organic substance metabolic process; RNA metabolic process; metabolic process; nucleic acid metabolic process; heterocycle metabolic process; nucleobase-containing compound metabolic process; cellular m…		organic cyclic compound binding; heterocyclic compound binding; nucleoside phosphate binding; binding; nucleic acid binding; protein binding; nucleotide binding; small molecule binding;				IPR008669; IPR011990; IPR000504; IPR034217; IPR012677; IPR034218;	LSM-interacting domain; Tetratricopeptide-like helical domain; RNA recognition motif domain; SART3, RNA recognition motif 1; Nucleotide-binding alpha-beta plait domain; SART3, RNA recognition motif 2;
F1RGB8	Uncharacterized protein	0.486314	Down	0.0155	KCTD10	BTB/POZ domain-containing adapter for CUL3-mediated RhoA degradation protein 3 OS=Homo sapiens GN=KCTD10 PE=1 SV=1	BTB/POZ domain-containing adapter for CUL3-mediated RhoA degradation protein 3 OS=Mus musculus GN=Kctd10 PE=2 SV=1	35.845	cytoskeleton	cellular component biogenesis; cellular component organization; protein complex subunit organization; protein homooligomerization; cellular component assembly; macromolecular complex assembly; protein complex biogenesis; cellular process; protein complex assembly; cellular component organization or biogenesis; protein oligomerization; macromolecular complex subunit organization;		protein binding; binding;	K15074			IPR011333; IPR003131; IPR000210;	SKP1/BTB/POZ domain; Potassium channel tetramerisation-type BTB domain; BTB/POZ domain;
F1RGC9	Uncharacterized protein	0.516873	Down	0.00412	PSMD13	26S proteasome non-ATPase regulatory subunit 13 OS=Homo sapiens GN=PSMD13 PE=1 SV=2	26S proteasome non-ATPase regulatory subunit 13 OS=Mus musculus GN=Psmd13 PE=1 SV=1	42.867	cytoplasm			protein binding; binding;	K03039	PSMD13; 26S proteasome regulatory subunit N9	ssc05169 Epstein-Barr virus infection - Sus scrofa (pig); ssc03050 Proteasome - Sus scrofa (pig);	IPR011991; IPR000717;	Winged helix-turn-helix DNA-binding domain; Proteasome component (PCI) domain;
F1RGD9	Uncharacterized protein	1.60813	Up	0.00121	HARS	"Histidine--tRNA ligase, cytoplasmic OS=Homo sapiens GN=HARS PE=1 SV=2"	"Histidine--tRNA ligase, cytoplasmic OS=Mus musculus GN=Hars PE=2 SV=2"	57.303	nucleus	peptide metabolic process; cellular aromatic compound metabolic process; cellular protein metabolic process; single-organism process; biosynthetic process; organonitrogen compound biosynthetic process; tRNA aminoacylation; cellular metabolic process; organic substance metabolic process; metabolic process; cellular amino acid metabolic process; heterocycle metabolic process; nucleobase-containing …	intracellular part; cell; cell part; intracellular; cytoplasm;	ligase activity, forming aminoacyl-tRNA and related compounds; ATP binding; nucleoside phosphate binding; ligase activity, forming carbon-oxygen bonds; nucleoside binding; ion binding; ligase activity; nucleotide binding; organic cyclic compound binding; heterocyclic compound binding; ribonucleoside binding; carbohydrate derivative binding; ribonucleotide binding; catalytic activity; binding; pur…	K01892	HARS; histidyl-tRNA synthetase [EC:6.1.1.21]	ssc00970 Aminoacyl-tRNA biosynthesis - Sus scrofa (pig);	IPR004154; IPR009068; IPR033656; IPR000738; IPR006195;	Anticodon-binding; S15/NS1, RNA-binding; Histidyl-anticodon-binding; WHEP-TRS domain; Aminoacyl-tRNA synthetase, class II;
F1RGE7	Uncharacterized protein	0.645136	Down	0.0131	SRA1	Steroid receptor RNA activator 1 OS=Homo sapiens GN=SRA1 PE=1 SV=1	Steroid receptor RNA activator 1 OS=Mus musculus GN=Sra1 PE=1 SV=3	30.459	nucleus
F1RGG1	40S ribosomal protein S19	3.13996	Up	0.00241	RPS19			16.06	cytoplasm	peptide metabolic process; peptide biosynthetic process; cellular protein metabolic process; nitrogen compound metabolic process; biosynthetic process; cellular amide metabolic process; primary metabolic process; organonitrogen compound biosynthetic process; organic substance biosynthetic process; cellular metabolic process; cellular biosynthetic process; organic substance metabolic process; meta…	ribosome; organelle; intracellular organelle; intracellular non-membrane-bounded organelle; cell part; intracellular; cytoplasm; macromolecular complex; intracellular part; ribonucleoprotein complex; cell; intracellular ribonucleoprotein complex; cytoplasmic part; non-membrane-bounded organelle;	structural constituent of ribosome; structural molecule activity;	K02966	RP-S19e; small subunit ribosomal protein S19e	ssc03010 Ribosome - Sus scrofa (pig);	IPR011991;	Winged helix-turn-helix DNA-binding domain;
F1RGG2	Uncharacterized protein	0.65991	Down	0.00535	ARHGEF1	Rho guanine nucleotide exchange factor 1 OS=Homo sapiens GN=ARHGEF1 PE=1 SV=2	Rho guanine nucleotide exchange factor 1 OS=Mus musculus GN=Arhgef1 PE=1 SV=2	105.03	nucleus	regulation of cellular process; regulation of biological process; regulation of cell communication; regulation of intracellular signal transduction; regulation of signaling; regulation of response to stimulus; regulation of Ras protein signal transduction; regulation of Rho protein signal transduction; regulation of signal transduction; regulation of small GTPase mediated signal transduction; bio…	intracellular part; cell; cell part; intracellular; cytoplasm;	Ras guanyl-nucleotide exchange factor activity; molecular function regulator; guanyl-nucleotide exchange factor activity; Rho guanyl-nucleotide exchange factor activity;	K12330	ARHGEF1; Rho guanine nucleotide exchange factor 1	ssc05205 Proteoglycans in cancer - Sus scrofa (pig); ssc04270 Vascular smooth muscle contraction - Sus scrofa (pig); ssc04810 Regulation of actin cytoskeleton - Sus scrofa (pig); ssc04611 Platelet activation - Sus scrofa (pig); ssc05200 Pathways in cancer - Sus scrofa (pig);	IPR016137; IPR015212; IPR011993; IPR000219; IPR001849;	RGS domain; Regulator of G protein signalling-like domain; PH domain-like; Dbl homology (DH) domain; Pleckstrin homology domain;
F1RGG8	Uncharacterized protein	0.376691	Down	0.0304	MZB1	Marginal zone B- and B1-cell-specific protein OS=Homo sapiens GN=MZB1 PE=1 SV=1	Marginal zone B- and B1-cell-specific protein OS=Mus musculus GN=Mzb1 PE=1 SV=2	20.576	extracellular							IPR021852;	Domain of unknown function DUF3456;
F1RGI2	Uncharacterized protein	0.388207	Down	0.00061	LOC100514845	Platelet-activating factor acetylhydrolase IB subunit gamma OS=Homo sapiens GN=PAFAH1B3 PE=1 SV=1	Platelet-activating factor acetylhydrolase IB subunit gamma OS=Mus musculus GN=Pafah1b3 PE=1 SV=1	26.042	extracellular				K16795	PAFAH1B2_3; platelet-activating factor acetylhydrolase IB subunit beta/gamma [EC:3.1.1.47]	ssc00565 Ether lipid metabolism - Sus scrofa (pig); ssc01100 Metabolic pathways - Sus scrofa (pig);	IPR013830;	SGNH hydrolase-type esterase domain;
F1RGK2	Uncharacterized protein	1.73806	Up	0.00427	MEGF8	Multiple epidermal growth factor-like domains protein 8 OS=Homo sapiens GN=MEGF8 PE=1 SV=2	Multiple epidermal growth factor-like domains protein 8 OS=Mus musculus GN=Megf8 PE=2 SV=2	297.25	plasma membrane		membrane;	cation binding; metal ion binding; protein binding; calcium ion binding; binding; ion binding;				IPR000859; IPR001881; IPR002049; IPR000742; IPR016201; IPR015915; IPR009030;	CUB domain; EGF-like calcium-binding domain; Laminin EGF domain; EGF-like domain; PSI domain; Kelch-type beta propeller; Growth factor receptor cysteine-rich domain;
F1RGL8	Uncharacterized protein	0.609019	Down	0.00286	---	Rab GTPase-binding effector protein 1 OS=Homo sapiens GN=RABEP1 PE=1 SV=2	Rab GTPase-binding effector protein 1 OS=Mus musculus GN=Rabep1 PE=1 SV=2	39.463	cytoplasm	transport; endocytosis; localization; establishment of localization; vesicle-mediated transport;		growth factor activity; enzyme regulator activity; receptor binding; nucleoside-triphosphatase regulator activity; binding; GTPase regulator activity; protein binding; molecular function regulator; enzyme activator activity; GTPase activator activity;	K12480	RABEP1; Rab GTPase-binding effector protein 1	ssc04144 Endocytosis - Sus scrofa (pig);	IPR018514;	Rabaptin coiled-coil domain;
F1RGM3	Uncharacterized protein	0.546263	Down	0.0347	TXNDC17	Thioredoxin domain-containing protein 17 OS=Homo sapiens GN=TXNDC17 PE=1 SV=1	Thioredoxin domain-containing protein 17 OS=Mus musculus GN=Txndc17 PE=1 SV=1	14.078	extracellular							IPR012336;	Thioredoxin-like fold;
F1RGP8	Uncharacterized protein	1.65335	Up	0.0159	---	Pre-B-cell leukemia transcription factor-interacting protein 1 OS=Homo sapiens GN=PBXIP1 PE=1 SV=1	Pre-B-cell leukemia transcription factor-interacting protein 1 OS=Mus musculus GN=Pbxip1 PE=1 SV=2	49.684	nucleus
F1RGQ6	Uncharacterized protein	0.575416	Down	0.00166	ANKFY1	Ankyrin repeat and FYVE domain-containing protein 1 OS=Homo sapiens GN=ANKFY1 PE=1 SV=2	Ankyrin repeat and FYVE domain-containing protein 1 OS=Mus musculus GN=Ankfy1 PE=2 SV=2	120.71	cyto_mito			metal ion binding; cation binding; protein binding; binding; ion binding;	K20129			IPR000306; IPR017455; IPR013083; IPR011333; IPR020683; IPR000210; IPR011011;	FYVE zinc finger; Zinc finger, FYVE-related; Zinc finger, RING/FYVE/PHD-type; SKP1/BTB/POZ domain; Ankyrin repeat-containing domain; BTB/POZ domain; Zinc finger, FYVE/PHD-type;
F1RGQ7	Uncharacterized protein	2.97808	Up	0.000114	CYB5D2	Neuferricin OS=Homo sapiens GN=CYB5D2 PE=2 SV=1	Neuferricin OS=Mus musculus GN=Cyb5d2 PE=1 SV=1	29.04	extracellular							IPR001199;	Cytochrome b5-like heme/steroid binding domain;
F1RGT0	Dihydroxyacetone phosphate acyltransferase	1.55819	Up	0.0334	GNPAT			76.786	mitochondria	ether lipid biosynthetic process; single-organism biosynthetic process; small molecule metabolic process; glycerol ether biosynthetic process; single-organism cellular process; ether lipid metabolic process; single-organism process; ether metabolic process; cellular lipid metabolic process; biosynthetic process; primary metabolic process; cellular metabolic process; organic substance biosynthetic…	organelle; intracellular membrane-bounded organelle; intracellular organelle; cell part; intracellular; peroxisome; microbody; cytoplasm; intracellular part; cell; membrane-bounded organelle; cytoplasmic part;	O-acetyltransferase activity; glycerone-phosphate O-acyltransferase activity; transferase activity, transferring acyl groups; transferase activity, transferring acyl groups other than amino-acyl groups; transferase activity; catalytic activity; acetyltransferase activity; O-acyltransferase activity;	K00649	GNPAT; glyceronephosphate O-acyltransferase [EC:2.3.1.42]	ssc04146 Peroxisome - Sus scrofa (pig); ssc00564 Glycerophospholipid metabolism - Sus scrofa (pig);	IPR002123;	Phospholipid/glycerol acyltransferase;
F1RGT2	Uncharacterized protein	0.285394	Down	0.000157	EGLN1	Egl nine homolog 1 OS=Homo sapiens GN=EGLN1 PE=1 SV=1	Egl nine homolog 1 OS=Mus musculus GN=Egln1 PE=2 SV=2	45.695	nucleus	single-organism process; metabolic process; oxidation-reduction process; single-organism metabolic process;		vitamin binding; iron ion binding; L-ascorbic acid binding; ion binding; organic acid binding; oxidoreductase activity, acting on paired donors, with incorporation or reduction of molecular oxygen; monosaccharide binding; oxidoreductase activity; carboxylic acid binding; transition metal ion binding; catalytic activity; binding; cation binding; metal ion binding; carbohydrate binding; anion bindi…	K09592	EGLN; hypoxia-inducible factor prolyl hydroxylase [EC:1.14.11.29]	ssc05211 Renal cell carcinoma - Sus scrofa (pig); ssc04066 HIF-1 signaling pathway - Sus scrofa (pig); ssc05200 Pathways in cancer - Sus scrofa (pig);	IPR002893; IPR006620; IPR005123;	Zinc finger, MYND-type; Prolyl 4-hydroxylase, alpha subunit; Oxoglutarate/iron-dependent dioxygenase;
F1RGT4	Uncharacterized protein	4.55684	Up	0.00281	MCRIP2	Protein FAM195A OS=Homo sapiens GN=FAM195A PE=1 SV=2	Protein FAM195A OS=Mus musculus GN=Fam195a PE=1 SV=1	17.466	mitochondria
F1RGW3	Uncharacterized protein	4.88164	Up	0.00256	COA6	Cytochrome c oxidase assembly factor 6 homolog OS=Homo sapiens GN=COA6 PE=1 SV=1	Cytochrome c oxidase assembly factor 6 homolog OS=Mus musculus GN=Coa6 PE=1 SV=1	15.165	extracellular		organelle; intracellular membrane-bounded organelle; intracellular organelle; cell part; intracellular; cytoplasm; intracellular part; membrane-bounded organelle; cell; mitochondrion; cytoplasmic part;	ion transmembrane transporter activity; substrate-specific transporter activity; monovalent inorganic cation transmembrane transporter activity; oxidoreductase activity, acting on a heme group of donors, oxygen as acceptor; oxidoreductase activity, acting on a heme group of donors; hydrogen ion transmembrane transporter activity; heme-copper terminal oxidase activity; oxidoreductase activity; sub…	K18179
F1RGX3	Uncharacterized protein	2.33857	Up	5.92e-06	LUC7L	Putative RNA-binding protein Luc7-like 1 OS=Homo sapiens GN=LUC7L PE=1 SV=1	Putative RNA-binding protein Luc7-like 1 OS=Mus musculus GN=Luc7l PE=2 SV=2	43.696	nucleus	cellular component biogenesis; mRNA splice site selection; cellular component organization; ribonucleoprotein complex biogenesis; ribonucleoprotein complex assembly; cellular aromatic compound metabolic process; cellular metabolic process; organic substance metabolic process; mRNA splicing, via spliceosome; metabolic process; RNA splicing, via transesterification reactions with bulged adenosine a…	U1 snRNP; intracellular organelle; intracellular organelle part; macromolecular complex; intracellular part; cell; organelle part; spliceosomal snRNP complex; intracellular membrane-bounded organelle; organelle; nucleus; cell part; intracellular; ribonucleoprotein complex; intracellular ribonucleoprotein complex; small nuclear ribonucleoprotein complex; membrane-bounded organelle; nuclear part;	organic cyclic compound binding; heterocyclic compound binding; mRNA binding; RNA binding; binding; nucleic acid binding;
F1RH90	Kinesin-like protein	1.52896	Up	0.00135	KIF20A			100.26	cyto_nucl	single-organism cellular process; microtubule-based movement; movement of cell or subcellular component; single-organism process; cellular process; microtubule-based process;		motor activity; nucleoside phosphate binding; hydrolase activity, acting on acid anhydrides; protein binding; hydrolase activity; organic cyclic compound binding; heterocyclic compound binding; cytoskeletal protein binding; pyrophosphatase activity; catalytic activity; ribonucleotide binding; microtubule binding; binding; purine ribonucleoside binding; anion binding; adenyl ribonucleotide binding…	K10402			IPR027417; IPR001752;	P-loop containing nucleoside triphosphate hydrolase; Kinesin motor domain;
F1RH94	Uncharacterized protein	1.60952	Up	0.00331	HNRNPA0	Heterogeneous nuclear ribonucleoprotein A0 OS=Homo sapiens GN=HNRNPA0 PE=1 SV=1	Heterogeneous nuclear ribonucleoprotein A0 OS=Mus musculus GN=Hnrnpa0 PE=1 SV=1	31.907	nucleus			organic cyclic compound binding; heterocyclic compound binding; nucleoside phosphate binding; binding; nucleic acid binding; nucleotide binding; small molecule binding;	K12894			IPR000504; IPR012677;	RNA recognition motif domain; Nucleotide-binding alpha-beta plait domain;
F1RHB4	Uncharacterized protein	0.179271	Down	0.0274	CXCL14	C-X-C motif chemokine 14 OS=Homo sapiens GN=CXCL14 PE=1 SV=2	C-X-C motif chemokine 14 OS=Mus musculus GN=Cxcl14 PE=2 SV=2	11.744	extracellular	immune system process; immune response; response to stimulus;	extracellular region;	cytokine activity; receptor binding; binding; chemokine receptor binding; cytokine receptor binding; protein binding; G-protein coupled receptor binding; chemokine activity;	K10033	CXCL14; C-X-C motif chemokine 14	ssc04060 Cytokine-cytokine receptor interaction - Sus scrofa (pig);	IPR001811;	Chemokine interleukin-8-like domain;
F1RHE6	Uncharacterized protein	0.561459	Down	0.0376	KCTD12	BTB/POZ domain-containing protein KCTD12 OS=Homo sapiens GN=KCTD12 PE=1 SV=1	BTB/POZ domain-containing protein KCTD12 OS=Mus musculus GN=Kctd12 PE=1 SV=1	35.838	nucleus	cellular component biogenesis; cellular component organization; protein complex subunit organization; protein homooligomerization; cellular component assembly; macromolecular complex assembly; protein complex biogenesis; cellular process; protein complex assembly; cellular component organization or biogenesis; protein oligomerization; macromolecular complex subunit organization;		protein binding; binding;				IPR003131; IPR011333; IPR000210;	Potassium channel tetramerisation-type BTB domain; SKP1/BTB/POZ domain; BTB/POZ domain;
F1RHF7	Uncharacterized protein	0.59983	Down	0.00252	DIS3	Exosome complex exonuclease RRP44 OS=Homo sapiens GN=DIS3 PE=1 SV=2	Exosome complex exonuclease RRP44 OS=Mus musculus GN=Dis3 PE=2 SV=4	85.754	cytoplasm				K12585	DIS3; exosome complex exonuclease DIS3/RRP44 [EC:3.1.13.-]	ssc03018 RNA degradation - Sus scrofa (pig);	IPR033770; IPR012340; IPR033771;	Exosome complex exonuclease RRP44, S1 domain; Nucleic acid-binding, OB-fold; Rrp44-like cold shock domain;
F1RHI8	Uncharacterized protein	0.176318	Down	0.0188	CRABP2	Cellular retinoic acid-binding protein 2 OS=Homo sapiens GN=CRABP2 PE=1 SV=2	Cellular retinoic acid-binding protein 2 OS=Mus musculus GN=Crabp2 PE=2 SV=2	15.721	cytoplasm	transport; localization; establishment of localization;		lipid binding; binding; transporter activity;	K17289			IPR000463; IPR012674; IPR000566; IPR011038;	Cytosolic fatty-acid binding; Calycin; Lipocalin/cytosolic fatty-acid binding domain; Calycin-like;
F1RHJ2	Uncharacterized protein	1.90365	Up	0.000772	HDGF	Hepatoma-derived growth factor OS=Homo sapiens GN=HDGF PE=1 SV=1	Hepatoma-derived growth factor OS=Mus musculus GN=Hdgf PE=1 SV=2	27.104	nucleus				K16641			IPR000313;	PWWP domain;
F1RHL9	Uncharacterized protein	4.0921	Up	0.000322	ACTN2	Alpha-actinin-2 OS=Homo sapiens GN=ACTN2 PE=1 SV=1	Alpha-actinin-2 OS=Mus musculus GN=Actn2 PE=1 SV=2	103.73	cyto_nucl			cation binding; metal ion binding; protein binding; calcium ion binding; binding; ion binding;	K21073	ACTN2_3; actinin alpha 2/3	ssc05412 Arrhythmogenic right ventricular cardiomyopathy (ARVC) - Sus scrofa (pig);	IPR014837; IPR011992; IPR002048; IPR001715;	EF-hand, Ca insensitive; EF-hand domain pair; EF-hand domain; Calponin homology domain;
F1RHN2	Uncharacterized protein	0.589314	Down	3.43e-05	ARVCF	Armadillo repeat protein deleted in velo-cardio-facial syndrome OS=Homo sapiens GN=ARVCF PE=1 SV=1	Armadillo repeat protein deleted in velo-cardio-facial syndrome homolog OS=Mus musculus GN=Arvcf PE=1 SV=2	104.27	nucleus			protein binding; binding;				IPR011989; IPR016024;	Armadillo-like helical; Armadillo-type fold;
F1RHS6	Uncharacterized protein	1.6396	Up	0.00192	PEX14	Peroxisomal membrane protein PEX14 OS=Homo sapiens GN=PEX14 PE=1 SV=1	Peroxisomal membrane protein PEX14 OS=Mus musculus GN=Pex14 PE=1 SV=1	40.97	nucleus				K13343	PEX14; peroxin-14	ssc04146 Peroxisome - Sus scrofa (pig);	IPR006785;	Peroxisome membrane anchor protein Pex14p, N-terminal;
F1RI39	Uncharacterized protein	3.36177	Up	0.000208	ACTN4	Alpha-actinin-4 OS=Homo sapiens GN=ACTN4 PE=1 SV=2	Alpha-actinin-4 OS=Mus musculus GN=Actn4 PE=1 SV=1	101.84	cyto_nucl			cation binding; metal ion binding; protein binding; calcium ion binding; binding; ion binding;	K05699	ACTN1_4; actinin alpha 1/4	ssc05146 Amoebiasis - Sus scrofa (pig); ssc04520 Adherens junction - Sus scrofa (pig); ssc04530 Tight junction - Sus scrofa (pig); ssc04510 Focal adhesion - Sus scrofa (pig); ssc04670 Leukocyte transendothelial migration - Sus scrofa (pig); ssc04810 Regulation of actin cytoskeleton - Sus scrofa (pig); ssc05203 Viral carcinogenesis - Sus scrofa (pig); ssc05322 Systemic lupus erythematosus - Sus sc…	IPR014837; IPR002048; IPR001715; IPR011992;	EF-hand, Ca insensitive; EF-hand domain; Calponin homology domain; EF-hand domain pair;
F1RI89	Uncharacterized protein	1.76175	Up	0.00904	MRPL16	"39S ribosomal protein L16, mitochondrial OS=Homo sapiens GN=MRPL16 PE=1 SV=1"	"39S ribosomal protein L16, mitochondrial OS=Mus musculus GN=Mrpl16 PE=2 SV=1"	28.632	mitochondria	peptide metabolic process; peptide biosynthetic process; cellular protein metabolic process; nitrogen compound metabolic process; biosynthetic process; cellular amide metabolic process; primary metabolic process; organonitrogen compound biosynthetic process; organic substance biosynthetic process; cellular metabolic process; cellular biosynthetic process; organic substance metabolic process; meta…	ribosome; organelle; intracellular organelle; intracellular non-membrane-bounded organelle; cell part; intracellular; cytoplasm; macromolecular complex; intracellular part; ribonucleoprotein complex; cell; intracellular ribonucleoprotein complex; cytoplasmic part; non-membrane-bounded organelle;	organic cyclic compound binding; heterocyclic compound binding; RNA binding; binding; nucleic acid binding; structural molecule activity; structural constituent of ribosome; rRNA binding;	K02878	RP-L16; large subunit ribosomal protein L16	ssc03010 Ribosome - Sus scrofa (pig);	IPR016180;	Ribosomal protein L10e/L16;
F1RIC1	Uncharacterized protein	2.01661	Up	0.00526	CCDC86	Coiled-coil domain-containing protein 86 OS=Homo sapiens GN=CCDC86 PE=1 SV=1	Coiled-coil domain-containing protein 86 OS=Mus musculus GN=Ccdc86 PE=1 SV=2	41.078	nucleus				K14822
F1RID1	Uncharacterized protein	0.607214	Down	0.00193	EFTUD1	Elongation factor Tu GTP-binding domain-containing protein 1 OS=Homo sapiens GN=EFTUD1 PE=1 SV=2	Elongation factor Tu GTP-binding domain-containing protein 1 OS=Mus musculus GN=Eftud1 PE=2 SV=1	54.906	cytoplasm			nucleoside phosphate binding; nucleoside binding; ion binding; hydrolase activity, acting on acid anhydrides; hydrolase activity; nucleotide binding; nucleoside-triphosphatase activity; organic cyclic compound binding; heterocyclic compound binding; ribonucleoside binding; carbohydrate derivative binding; pyrophosphatase activity; catalytic activity; ribonucleotide binding; binding; GTPase activi…	K14536	RIA1; ribosome assembly protein 1 [EC:3.6.5.-]	ssc03008 Ribosome biogenesis in eukaryotes - Sus scrofa (pig);	IPR005225; IPR027417; IPR000795;	Small GTP-binding protein domain; P-loop containing nucleoside triphosphate hydrolase; Transcription factor, GTP-binding domain;
F1RIE0	Uncharacterized protein	1.51256	Up	0.018	MESDC2	LDLR chaperone MESD OS=Homo sapiens GN=MESDC2 PE=1 SV=2	LDLR chaperone MESD OS=Mus musculus GN=Mesdc2 PE=1 SV=1	25.877	extracellular
F1RIE2	Uncharacterized protein	1.87899	Up	6.45e-06	DDB1	DNA damage-binding protein 1 OS=Homo sapiens GN=DDB1 PE=1 SV=1	DNA damage-binding protein 1 OS=Mus musculus GN=Ddb1 PE=1 SV=2	126.95	cytoplasm		organelle; intracellular membrane-bounded organelle; intracellular organelle; nucleus; cell part; intracellular; intracellular part; membrane-bounded organelle; cell;	organic cyclic compound binding; heterocyclic compound binding; protein binding; binding; nucleic acid binding;	K10610	DDB1; DNA damage-binding protein 1	ssc04120 Ubiquitin mediated proteolysis - Sus scrofa (pig); ssc05203 Viral carcinogenesis - Sus scrofa (pig); ssc03420 Nucleotide excision repair - Sus scrofa (pig); ssc05161 Hepatitis B - Sus scrofa (pig);	IPR015943; IPR011047; IPR004871;	WD40/YVTN repeat-like-containing domain; Quinoprotein alcohol dehydrogenase-like superfamily; Cleavage/polyadenylation specificity factor, A subunit, C-terminal;
F1RIF0	Uncharacterized protein	0.444484	Down	5.9e-05	---	Cell migration-inducing and hyaluronan-binding protein OS=Homo sapiens GN=CEMIP PE=1 SV=2	Protein KIAA1199 homolog OS=Mus musculus PE=2 SV=4	33.004	cytoplasm				K19031
F1RIF3	Uncharacterized protein	3.21521	Up	4.25e-07	FAH	Fumarylacetoacetase OS=Homo sapiens GN=FAH PE=1 SV=2	Fumarylacetoacetase OS=Mus musculus GN=Fah PE=1 SV=2	46.141	nucleus	aromatic amino acid family metabolic process; cellular aromatic compound metabolic process; small molecule metabolic process; single-organism cellular process; organic cyclic compound metabolic process; nitrogen compound metabolic process; single-organism process; primary metabolic process; cellular metabolic process; organic substance metabolic process; metabolic process; cellular amino acid met…		fumarylacetoacetase activity; hydrolase activity; hydrolase activity, acting on acid carbon-carbon bonds, in ketonic substances; catalytic activity; hydrolase activity, acting on acid carbon-carbon bonds;	K01555	FAH; fumarylacetoacetase [EC:3.7.1.2]	ssc00350 Tyrosine metabolism - Sus scrofa (pig); ssc01100 Metabolic pathways - Sus scrofa (pig);	IPR011234; IPR015377;	Fumarylacetoacetase, C-terminal-related; Fumarylacetoacetase, N-terminal;
F1RIF9	Uncharacterized protein	0.553188	Down	0.00207	KIF1B	Kinesin-like protein KIF1B OS=Homo sapiens GN=KIF1B PE=1 SV=5	Kinesin-like protein KIF1B OS=Mus musculus GN=Kif1b PE=1 SV=2	203.75	nucleus	single-organism cellular process; microtubule-based movement; movement of cell or subcellular component; single-organism process; cellular process; microtubule-based process;		motor activity; nucleoside phosphate binding; hydrolase activity, acting on acid anhydrides; hydrolase activity; protein binding; organic cyclic compound binding; heterocyclic compound binding; cytoskeletal protein binding; pyrophosphatase activity; catalytic activity; ribonucleotide binding; microtubule binding; binding; purine ribonucleoside binding; anion binding; adenyl ribonucleotide binding…	K10392			IPR008984; IPR022140; IPR022164; IPR027417; IPR032405; IPR000253; IPR001752; IPR001849; IPR011993;	SMAD/FHA domain; Kinesin-like KIF1-type; Kinesin-like; P-loop containing nucleoside triphosphate hydrolase; Kinesin-associated; Forkhead-associated (FHA) domain; Kinesin motor domain; Pleckstrin homology domain; PH domain-like;
F1RII4	Uncharacterized protein	1.73403	Up	0.000386	PARK7	Protein DJ-1 OS=Homo sapiens GN=PARK7 PE=1 SV=2	Protein DJ-1 OS=Mus musculus GN=Park7 PE=1 SV=1	14.42	cytoplasm	protein deglycation; metabolic process; cellular macromolecule metabolic process; cellular protein metabolic process; cellular protein modification process; protein repair; macromolecule metabolic process; protein metabolic process; protein modification process; primary metabolic process; macromolecule modification; cellular metabolic process; cellular process; organic substance metabolic process;		lyase activity; hydro-lyase activity; protein deglycase activity; catalytic activity; carbon-oxygen lyase activity;	K05687	PARK7; protein DJ-1	ssc05012 Parkinson's disease - Sus scrofa (pig);	IPR029062; IPR002818;	Class I glutamine amidotransferase-like; DJ-1/PfpI;
F1RII7	Hemoglobin subunit beta	0.25731	Down	0.0308	HBB			16.166	cytoplasm	oxygen transport; transport; gas transport; single-organism localization; single-organism process; localization; establishment of localization; single-organism transport;	cell part; intracellular; hemoglobin complex; cytoplasm; macromolecular complex; intracellular part; cytosolic part; protein complex; cell; cytosol; cytoplasmic part;	organic cyclic compound binding; heterocyclic compound binding; heme binding; iron ion binding; transition metal ion binding; oxygen binding; binding; ion binding; metal ion binding; cation binding; tetrapyrrole binding;	K13823	HBB; hemoglobin subunit beta	ssc05144 Malaria - Sus scrofa (pig); ssc05143 African trypanosomiasis - Sus scrofa (pig);	IPR009050; IPR000971; IPR012292;	Globin-like; Globin; Globin/Protoglobin;
F1RIK3	Uncharacterized protein	0.512843	Down	7.34e-05	ACOT7	Cytosolic acyl coenzyme A thioester hydrolase OS=Homo sapiens GN=ACOT7 PE=1 SV=3	Cytosolic acyl coenzyme A thioester hydrolase OS=Mus musculus GN=Acot7 PE=2 SV=1	40.189	nucleus				K17360	ACOT7; acyl-coenzyme A thioesterase 7 [EC:3.1.2.2]	ssc00062 Fatty acid elongation - Sus scrofa (pig); ssc01040 Biosynthesis of unsaturated fatty acids - Sus scrofa (pig);	IPR006683; IPR029069; IPR033120;	Thioesterase domain; HotDog domain; Hotdog acyl-CoA thioesterase (ACOT)-type domain;
F1RIP1	Glycogen [starch] synthase	0.641077	Down	0.00946	GYS1			83.775	nucleus	carbohydrate biosynthetic process; polysaccharide biosynthetic process; glucan metabolic process; single-organism process; biosynthetic process; energy reserve metabolic process; cellular metabolic process; cellular polysaccharide metabolic process; organic substance metabolic process; metabolic process; generation of precursor metabolites and energy; cellular carbohydrate metabolic process; poly…		transferase activity, transferring hexosyl groups; catalytic activity; UDP-glucosyltransferase activity; UDP-glycosyltransferase activity; glucosyltransferase activity; glycogen (starch) synthase activity; transferase activity, transferring glycosyl groups; transferase activity;	K00693	GYS; glycogen synthase [EC:2.4.1.11]	ssc04922 Glucagon signaling pathway - Sus scrofa (pig); ssc04931 Insulin resistance - Sus scrofa (pig); ssc04910 Insulin signaling pathway - Sus scrofa (pig); ssc04151 PI3K-Akt signaling pathway - Sus scrofa (pig); ssc00500 Starch and sucrose metabolism - Sus scrofa (pig); ssc04152 AMPK signaling pathway - Sus scrofa (pig); ssc01100 Metabolic pathways - Sus scrofa (pig);
F1RIS8	Mevalonate kinase	0.633721	Down	0.0137	MVK			42.704	extracellular	isoprenoid metabolic process; single-organism biosynthetic process; single-organism cellular process; single-organism process; biosynthetic process; cellular lipid metabolic process; primary metabolic process; organic substance biosynthetic process; cellular metabolic process; cellular biosynthetic process; organic substance metabolic process; lipid biosynthetic process; isoprenoid biosynthetic p…	intracellular part; cell; cell part; intracellular; cytoplasm;	ATP binding; nucleoside phosphate binding; phosphotransferase activity, alcohol group as acceptor; nucleoside binding; ion binding; nucleotide binding; mevalonate kinase activity; organic cyclic compound binding; heterocyclic compound binding; ribonucleoside binding; carbohydrate derivative binding; kinase activity; catalytic activity; ribonucleotide binding; binding; purine ribonucleoside bindin…	K00869	E2.7.1.36; mevalonate kinase [EC:2.7.1.36]	ssc04146 Peroxisome - Sus scrofa (pig); ssc00900 Terpenoid backbone biosynthesis - Sus scrofa (pig); ssc01100 Metabolic pathways - Sus scrofa (pig);	IPR020568; IPR006204; IPR014721; IPR013750;	Ribosomal protein S5 domain 2-type fold; GHMP kinase N-terminal domain; Ribosomal protein S5 domain 2-type fold, subgroup; GHMP kinase, C-terminal domain;
F1RIW2	Uncharacterized protein	0.382774	Down	2.68e-05	SPOCK3	Testican-3 OS=Homo sapiens GN=SPOCK3 PE=1 SV=2	Testican-3 OS=Mus musculus GN=Spock3 PE=2 SV=2	32.514	cytoplasm	regulation of cellular process; single organism signaling; cellular response to stimulus; signal transduction; regulation of biological process; cell communication; single-organism process; signaling; response to stimulus; cellular process; biological regulation;	extracellular matrix; extracellular region part; extracellular region; proteinaceous extracellular matrix;	cation binding; metal ion binding; protein binding; calcium ion binding; binding; ion binding;	K08136			IPR002350; IPR019577; IPR011992; IPR000716;	Kazal domain; SPARC/Testican, calcium-binding domain; EF-hand domain pair; Thyroglobulin type-1;
F1RJ25	Fructose-bisphosphate aldolase	4.34948	Up	0.000151	ALDOC			39.376	cytoplasm	ATP generation from ADP; nucleoside metabolic process; purine nucleoside metabolic process; nucleoside diphosphate phosphorylation; ADP metabolic process; pyridine nucleotide metabolic process; glycolytic process; purine ribonucleoside monophosphate metabolic process; nucleotide metabolic process; single-organism process; ribonucleoside diphosphate metabolic process; nucleotide phosphorylation; p…		lyase activity; fructose-bisphosphate aldolase activity; aldehyde-lyase activity; catalytic activity; carbon-carbon lyase activity;	K01623	ALDO; fructose-bisphosphate aldolase, class I [EC:4.1.2.13]	ssc00051 Fructose and mannose metabolism - Sus scrofa (pig); ssc00030 Pentose phosphate pathway - Sus scrofa (pig); ssc00010 Glycolysis / Gluconeogenesis - Sus scrofa (pig); ssc01200 Carbon metabolism - Sus scrofa (pig); ssc01230 Biosynthesis of amino acids - Sus scrofa (pig); ssc01100 Metabolic pathways - Sus scrofa (pig);	IPR013785;	Aldolase-type TIM barrel;
F1RJ93	Transgelin	0.61891	Down	0.00021	TAGLN2			23.302	cytoplasm			protein binding; binding;	K20526			IPR001715;	Calponin homology domain;
F1RJI2	Uncharacterized protein	0.547731	Down	0.00449	RABGEF1	Rab5 GDP/GTP exchange factor OS=Homo sapiens GN=RABGEF1 PE=1 SV=2	Rab5 GDP/GTP exchange factor OS=Mus musculus GN=Rabgef1 PE=1 SV=1	57.017	cytoplasm			organic cyclic compound binding; heterocyclic compound binding; DNA binding; transition metal ion binding; binding; ion binding; nucleic acid binding; metal ion binding; cation binding; zinc ion binding;	K20131			IPR002653; IPR003123;	Zinc finger, A20-type; VPS9 domain;
F1RJI9	"Glutamyl-tRNA(Gln) amidotransferase subunit C, mitochondrial"	1.57149	Up	0.00183	GATC			15.258	mitochondria	regulation of cellular process; regulation of gene expression; regulation of biological quality; regulation of translational elongation; regulation of cellular biosynthetic process; regulation of primary metabolic process; regulation of translational fidelity; regulation of macromolecule metabolic process; posttranscriptional regulation of gene expression; regulation of macromolecule biosynthetic…			K02435	gatC; aspartyl-tRNA(Asn)/glutamyl-tRNA(Gln) amidotransferase subunit C [EC:6.3.5.6 6.3.5.7]	ssc00970 Aminoacyl-tRNA biosynthesis - Sus scrofa (pig); ssc01100 Metabolic pathways - Sus scrofa (pig);
F1RJJ2	Uncharacterized protein	1.97582	Up	0.00057	TYW1	S-adenosyl-L-methionine-dependent tRNA 4-demethylwyosine synthase OS=Homo sapiens GN=TYW1 PE=2 SV=2	tRNA wybutosine-synthesizing protein 1 homolog OS=Mus musculus GN=Tyw1 PE=1 SV=1	83.113	cytoplasm	single-organism process; metabolic process; oxidation-reduction process; single-organism metabolic process;		nucleoside phosphate binding; ion binding; nucleotide binding; cofactor binding; heterocyclic compound binding; organic cyclic compound binding; carbohydrate derivative binding; ribonucleotide binding; catalytic activity; binding; iron-sulfur cluster binding; anion binding; FMN binding; small molecule binding; metal cluster binding;	K15449			IPR013785; IPR007197; IPR008254; IPR029039; IPR013917;	Aldolase-type TIM barrel; Radical SAM; Flavodoxin/nitric oxide synthase; Flavoprotein-like domain; tRNA wybutosine-synthesis;
F1RJJ3	Uncharacterized protein	0.477965	Down	3.65e-05	SBDS	Ribosome maturation protein SBDS OS=Homo sapiens GN=SBDS PE=1 SV=4	Ribosome maturation protein SBDS OS=Mus musculus GN=Sbds PE=1 SV=4	28.745	mitochondria	cellular component biogenesis; cellular component organization; cellular macromolecular complex assembly; ribonucleoprotein complex biogenesis; ribonucleoprotein complex assembly; ribosome biogenesis; mature ribosome assembly; ribosome assembly; macromolecular complex subunit organization; ribonucleoprotein complex subunit organization; cellular component assembly; organelle assembly; macromolecu…			K14574	SDO1; ribosome maturation protein SDO1	ssc03008 Ribosome biogenesis in eukaryotes - Sus scrofa (pig);	IPR018978; IPR019783;	Ribosome maturation protein SBDS, C-terminal; Ribosome maturation protein SBDS, N-terminal;
F1RJK5	Uncharacterized protein	0.636915	Down	0.00266	---	Translational activator GCN1 OS=Homo sapiens GN=GCN1L1 PE=1 SV=6	Protein Gcn1l1 OS=Mus musculus GN=Gcn1l1 PE=2 SV=1	139.71	plasma membrane			binding;				IPR034085; IPR011989; IPR016024;	TOG domain; Armadillo-like helical; Armadillo-type fold;
F1RJM2	Endoplasmic reticulum resident protein 29	1.70923	Up	0.000825	ERP29			29.328	extracellular	single-organism cellular process; single-organism process; organic substance transport; protein transport; establishment of localization; establishment of protein localization; transport; single-organism localization; secretion by cell; protein secretion; protein localization; macromolecule localization; localization; cellular process; secretion; single-organism transport;	endoplasmic reticulum lumen; intracellular organelle; endoplasmic reticulum; cytoplasm; intracellular organelle part; endomembrane system; intracellular part; cell; organelle part; organelle; intracellular membrane-bounded organelle; membrane-enclosed lumen; intracellular organelle lumen; endoplasmic reticulum part; cell part; intracellular; membrane-bounded organelle; cytoplasmic part; organelle…		K09586	ERP29; endoplasmic reticulum protein 29	ssc04141 Protein processing in endoplasmic reticulum - Sus scrofa (pig);	IPR012336; IPR011679; IPR012883;	Thioredoxin-like fold; Endoplasmic reticulum, protein ERp29, C-terminal; ERp29, N-terminal;
F1RJV2	Uncharacterized protein	0.63058	Down	1.06e-05	RAD50	DNA repair protein RAD50 OS=Homo sapiens GN=RAD50 PE=1 SV=1	DNA repair protein RAD50 OS=Mus musculus GN=Rad50 PE=4 SV=1	153.88	cytoplasm	cellular component organization; cellular response to stress; regulation of biological quality; cellular aromatic compound metabolic process; DNA metabolic process; response to stimulus; cellular metabolic process; anatomical structure homeostasis; organic substance metabolic process; homeostatic process; metabolic process; heterocycle metabolic process; nucleobase-containing compound metabolic p…	organelle; intracellular membrane-bounded organelle; intracellular organelle; nucleus; cell part; intracellular; intracellular organelle part; macromolecular complex; intracellular part; protein complex; Mre11 complex; membrane-bounded organelle; cell; organelle part; nuclear part;	hydrolase activity, acting on acid anhydrides; hydrolase activity; pyrophosphatase activity; nucleoside-triphosphatase activity; hydrolase activity, acting on acid anhydrides, in phosphorus-containing anhydrides; catalytic activity; ATPase activity;	K10866	RAD50; DNA repair protein RAD50 [EC:3.6.-.-]	ssc03450 Non-homologous end-joining - Sus scrofa (pig); ssc03440 Homologous recombination - Sus scrofa (pig);	IPR027417;	P-loop containing nucleoside triphosphate hydrolase;
F1RJZ4	Uncharacterized protein	3.0087	Up	0.00704	GPALPP1	GPALPP motifs-containing protein 1 OS=Homo sapiens GN=GPALPP1 PE=1 SV=1	GPALPP motifs-containing protein 1 OS=Mus musculus GN=Gpalpp1 PE=1 SV=2	39.139	nucleus
F1RK02	Uncharacterized protein	0.243914	Down	0.0307	LCP1	Plastin-2 OS=Homo sapiens GN=LCP1 PE=1 SV=6	Plastin-2 OS=Mus musculus GN=Lcp1 PE=1 SV=4	71.414	cytoplasm			cation binding; metal ion binding; protein binding; calcium ion binding; binding; ion binding;	K17276			IPR011992; IPR002048; IPR001715;	EF-hand domain pair; EF-hand domain; Calponin homology domain;
F1RK53	Coronin	0.499238	Down	0.0247	LOC100513346			99.988	nucleus			protein binding; binding;	K18619			IPR017986; IPR015943; IPR015048; IPR011047;	WD40-repeat-containing domain; WD40/YVTN repeat-like-containing domain; Domain of unknown function DUF1899; Quinoprotein alcohol dehydrogenase-like superfamily;
F1RK59	Uncharacterized protein	3.76676	Up	0.00314	MRPL40	"39S ribosomal protein L40, mitochondrial OS=Homo sapiens GN=MRPL40 PE=1 SV=1"	"39S ribosomal protein L40, mitochondrial OS=Mus musculus GN=Mrpl40 PE=2 SV=2"	24.031	mitochondria				K17421
F1RKF9	Uncharacterized protein	1.71126	Up	6.25e-05	CUX1	Homeobox protein cut-like 1 OS=Homo sapiens GN=CUX1 PE=1 SV=3	Homeobox protein cut-like 1 OS=Mus musculus GN=Cux1 PE=2 SV=1	122.75	nucleus			organic cyclic compound binding; heterocyclic compound binding; DNA binding; binding; nucleic acid binding;	K09313			IPR010982; IPR003350;	Lambda repressor-like, DNA-binding domain; CUT domain;
F1RKG8	Uncharacterized protein	2.74838	Up	0.00069	PEBP1	Phosphatidylethanolamine-binding protein 1 OS=Homo sapiens GN=PEBP1 PE=1 SV=3	Phosphatidylethanolamine-binding protein 1 OS=Mus musculus GN=Pebp1 PE=1 SV=3	20.971	cytoplasm
F1RKI9	Uncharacterized protein	0.614077	Down	0.00504	PSMD8	26S proteasome non-ATPase regulatory subunit 8 OS=Homo sapiens GN=PSMD8 PE=1 SV=2	26S proteasome non-ATPase regulatory subunit 8 OS=Mus musculus GN=Psmd8 PE=2 SV=2	39.732	nucleus				K03031	PSMD8; 26S proteasome regulatory subunit N12	ssc05169 Epstein-Barr virus infection - Sus scrofa (pig); ssc03050 Proteasome - Sus scrofa (pig);	IPR033464;	CSN8/PSMD8/EIF3K;
F1RKV7	Cytokine receptor-like factor 3	0.592824	Down	0.0028	CRLF3			49.107	cytoplasm			protein binding; binding;				IPR013783; IPR003961;	Immunoglobulin-like fold; Fibronectin type III;
F1RKW7	Uncharacterized protein	1.54293	Up	0.0204	ZNF207	BUB3-interacting and GLEBS motif-containing protein ZNF207 OS=Homo sapiens GN=ZNF207 PE=1 SV=1	Protein Zfp207 OS=Mus musculus GN=Zfp207 PE=2 SV=1	49.779	nucleus			metal ion binding; cation binding; binding; ion binding;				IPR015880; IPR007087;	Zinc finger, C2H2-like; Zinc finger, C2H2;
F1RKW8	Uncharacterized protein	0.606157	Down	0.00304	PSMD11	26S proteasome non-ATPase regulatory subunit 11 OS=Homo sapiens GN=PSMD11 PE=1 SV=3	26S proteasome non-ATPase regulatory subunit 11 OS=Mus musculus GN=Psmd11 PE=1 SV=3	44.238	cytoplasm			protein binding; binding;	K03036	PSMD11; 26S proteasome regulatory subunit N6	ssc05169 Epstein-Barr virus infection - Sus scrofa (pig); ssc03050 Proteasome - Sus scrofa (pig);	IPR011991; IPR000717; IPR011990;	Winged helix-turn-helix DNA-binding domain; Proteasome component (PCI) domain; Tetratricopeptide-like helical domain;
F1RKY8	Phosphomannomutase	0.551544	Down	0.0177	---			15.573	extracellular	nucleotide-sugar biosynthetic process; heterocycle biosynthetic process; cellular aromatic compound metabolic process; nucleobase-containing compound biosynthetic process; organic cyclic compound metabolic process; nitrogen compound metabolic process; biosynthetic process; primary metabolic process; cellular metabolic process; organic substance biosynthetic process; cellular biosynthetic process;…	intracellular part; cell; cell part; intracellular; cytoplasm;	phosphomannomutase activity; isomerase activity; catalytic activity; intramolecular transferase activity; intramolecular transferase activity, phosphotransferases;				IPR023214;	HAD-like domain;
F1RKZ6	Uncharacterized protein	0.567093	Down	0.0485	USP7	Ubiquitin carboxyl-terminal hydrolase 7 OS=Homo sapiens GN=USP7 PE=1 SV=2	Ubiquitin carboxyl-terminal hydrolase OS=Mus musculus GN=Usp7 PE=2 SV=1	128.5	nucleus	modification-dependent macromolecule catabolic process; protein modification by small protein removal; cellular macromolecule catabolic process; proteolysis involved in cellular protein catabolic process; cellular protein catabolic process; modification-dependent protein catabolic process; cellular protein metabolic process; ubiquitin-dependent protein catabolic process; protein modification by s…		peptidase activity; thiol-dependent ubiquitinyl hydrolase activity; catalytic activity; binding; ubiquitin-like protein-specific protease activity; ubiquitinyl hydrolase activity; peptidase activity, acting on L-amino acid peptides; cysteine-type peptidase activity; hydrolase activity; protein binding;	K11838	USP7; ubiquitin carboxyl-terminal hydrolase 7 [EC:3.4.19.12]	ssc05169 Epstein-Barr virus infection - Sus scrofa (pig); ssc04068 FoxO signaling pathway - Sus scrofa (pig); ssc05168 Herpes simplex infection - Sus scrofa (pig); ssc05203 Viral carcinogenesis - Sus scrofa (pig);	IPR008974; IPR024729; IPR002083; IPR028889; IPR001394; IPR029346;	TRAF-like; Ubiquitin carboxyl-terminal hydrolase 7, ICP0-binding domain; MATH/TRAF domain; Ubiquitin specific protease domain; Peptidase C19, ubiquitin carboxyl-terminal hydrolase; Ubiquitin carboxyl-terminal hydrolase, C-terminal;
F1RL38	Uncharacterized protein	4.42452	Up	7.09e-06	DDT	D-dopachrome decarboxylase OS=Homo sapiens GN=DDT PE=1 SV=3	D-dopachrome decarboxylase OS=Mus musculus GN=Ddt PE=1 SV=3	12.888	cytoplasm				K10028			IPR014347;	Tautomerase/MIF superfamily;
F1RL66	Uncharacterized protein	2.34351	Up	0.00152	TCOF1	Treacle protein OS=Homo sapiens GN=TCOF1 PE=1 SV=3	Tcof1 protein OS=Mus musculus GN=Tcof1 PE=2 SV=1	136.8	nucleus			protein binding; binding;	K14562	TCOF1; Treacher Collins syndrome protein	ssc03008 Ribosome biogenesis in eukaryotes - Sus scrofa (pig);	IPR003993; IPR006594;	Treacher Collins syndrome, treacle; LIS1 homology motif;
F1RL81	Uncharacterized protein	0.43532	Down	0.000124	HSD17B14	17-beta-hydroxysteroid dehydrogenase 14 OS=Homo sapiens GN=HSD17B14 PE=1 SV=1	Protein Hsd17b14 OS=Mus musculus GN=Hsd17b14 PE=2 SV=1	28.287	cytoplasm			catalytic activity; oxidoreductase activity;				IPR016040;	NAD(P)-binding domain;
F1RL85	Uncharacterized protein	1.53591	Up	0.0182	GRWD1	Glutamate-rich WD repeat-containing protein 1 OS=Homo sapiens GN=GRWD1 PE=1 SV=1	Glutamate-rich WD repeat-containing protein 1 OS=Mus musculus GN=Grwd1 PE=2 SV=2	49.25	nucleus			protein binding; binding;	K14848			IPR022052; IPR017986; IPR015943;	Histone-binding protein RBBP4, N-terminal; WD40-repeat-containing domain; WD40/YVTN repeat-like-containing domain;
F1RLD6	Uncharacterized protein	0.521505	Down	0.0277	ZNF260	Zinc finger protein 260 OS=Homo sapiens GN=ZNF260 PE=2 SV=3	Zinc finger protein 260 OS=Mus musculus GN=Znf260 PE=1 SV=1	46.772	nucleus			organic cyclic compound binding; heterocyclic compound binding; binding; nucleic acid binding; ion binding; cation binding; metal ion binding;				IPR015880; IPR007087; IPR013087;	Zinc finger, C2H2-like; Zinc finger, C2H2; Zinc finger C2H2-type/integrase DNA-binding domain;
F1RLE9	Uncharacterized protein	0.489902	Down	0.0106	TRIM36	E3 ubiquitin-protein ligase TRIM36 OS=Homo sapiens GN=TRIM36 PE=2 SV=2	E3 ubiquitin-protein ligase Trim36 OS=Mus musculus GN=Trim36 PE=2 SV=1	81.718	nucleus		cell; intracellular; cell part;	cation binding; metal ion binding; protein binding; zinc ion binding; transition metal ion binding; binding; ion binding;	K12013			IPR003649; IPR001841; IPR001870; IPR003961; IPR017903; IPR013320; IPR000315; IPR027370; IPR013783; IPR013083; IPR003879;	B-box, C-terminal; Zinc finger, RING-type; B30.2/SPRY domain; Fibronectin type III; COS domain; Concanavalin A-like lectin/glucanase domain; B-box-type zinc finger; RING-type zinc-finger, LisH dimerisation motif; Immunoglobulin-like fold; Zinc finger, RING/FYVE/PHD-type; Butyrophylin-like;
F1RLG4	Uncharacterized protein	0.647103	Down	0.0182	SRP19	Signal recognition particle 19 kDa protein OS=Homo sapiens GN=SRP19 PE=1 SV=3	Signal recognition particle 19 kDa protein OS=Mus musculus GN=Srp19 PE=2 SV=1	16.156	cytoplasm	intracellular transport; establishment of protein localization to endoplasmic reticulum; establishment of protein localization to organelle; protein localization to membrane; protein targeting to ER; organic substance transport; cotranslational protein targeting to membrane; protein transport; cellular localization; establishment of localization; establishment of protein localization; protein tar…	cell part; intracellular; signal recognition particle; cytoplasm; macromolecular complex; intracellular part; ribonucleoprotein complex; intracellular ribonucleoprotein complex; cell; cytoplasmic part;	organic cyclic compound binding; heterocyclic compound binding; RNA binding; binding; 7S RNA binding; nucleic acid binding;	K03105	SRP19; signal recognition particle subunit SRP19	ssc03060 Protein export - Sus scrofa (pig);
F1RLL9	Uncharacterized protein	1.75048	Up	0.000166	COL4A2	Collagen alpha-2(IV) chain OS=Homo sapiens GN=COL4A2 PE=1 SV=4	Collagen alpha-2(IV) chain OS=Mus musculus GN=Col4a2 PE=2 SV=4	161.21	cyto_nucl		macromolecular complex; protein complex; collagen trimer;	extracellular matrix structural constituent; structural molecule activity;	K06237	COL4A; collagen, type IV, alpha	ssc05146 Amoebiasis - Sus scrofa (pig); ssc04151 PI3K-Akt signaling pathway - Sus scrofa (pig); ssc04974 Protein digestion and absorption - Sus scrofa (pig); ssc04510 Focal adhesion - Sus scrofa (pig); ssc05200 Pathways in cancer - Sus scrofa (pig); ssc04512 ECM-receptor interaction - Sus scrofa (pig); ssc05222 Small cell lung cancer - Sus scrofa (pig); ssc04933 AGE-RAGE signaling pathway in diab…	IPR016187;	C-type lectin fold;
F1RLM1	Uncharacterized protein	2.2394	Up	0.00824	COL4A1	Collagen alpha-1(IV) chain OS=Homo sapiens GN=COL4A1 PE=1 SV=3	Collagen alpha-1(IV) chain OS=Mus musculus GN=Col4a1 PE=2 SV=4	156.02	cyto_nucl		macromolecular complex; protein complex; collagen trimer;	extracellular matrix structural constituent; structural molecule activity;	K06237	COL4A; collagen, type IV, alpha	ssc05146 Amoebiasis - Sus scrofa (pig); ssc04151 PI3K-Akt signaling pathway - Sus scrofa (pig); ssc04974 Protein digestion and absorption - Sus scrofa (pig); ssc04510 Focal adhesion - Sus scrofa (pig); ssc05200 Pathways in cancer - Sus scrofa (pig); ssc04512 ECM-receptor interaction - Sus scrofa (pig); ssc05222 Small cell lung cancer - Sus scrofa (pig); ssc04933 AGE-RAGE signaling pathway in diab…	IPR016187;	C-type lectin fold;
F1RLP1	DNA ligase	0.549975	Down	0.00728	LIG4			103.8	cytoplasm	cellular response to stress; DNA ligation; cellular aromatic compound metabolic process; DNA metabolic process; biosynthetic process; response to stimulus; cellular metabolic process; organic substance metabolic process; metabolic process; heterocycle metabolic process; aromatic compound biosynthetic process; nucleobase-containing compound metabolic process; DNA biosynthetic process; cellular nit…		DNA binding; ATP binding; DNA ligase (ATP) activity; nucleoside phosphate binding; ligase activity; nucleoside binding; ion binding; ligase activity, forming phosphoric ester bonds; DNA ligase activity; nucleotide binding; heterocyclic compound binding; organic cyclic compound binding; ribonucleoside binding; carbohydrate derivative binding; catalytic activity; ribonucleotide binding; binding; nu…	K10777	LIG4; DNA ligase 4 [EC:6.5.1.1]	ssc03450 Non-homologous end-joining - Sus scrofa (pig);	IPR012340; IPR012308; IPR012310; IPR012309; IPR021536; IPR001357;	Nucleic acid-binding, OB-fold; DNA ligase, ATP-dependent, N-terminal; DNA ligase, ATP-dependent, central; DNA ligase, ATP-dependent, C-terminal; DNA ligase IV domain; BRCT domain;
F1RLQ2	Prelamin-A/C	2.61405	Up	0.00055	LMNA			74.232	nucleus		intracellular organelle; polymeric cytoskeletal fiber; intracellular non-membrane-bounded organelle; cytoskeletal part; intracellular organelle part; supramolecular fiber; intracellular part; cell; supramolecular complex; organelle part; supramolecular polymer; non-membrane-bounded organelle; organelle; cytoskeleton; intermediate filament cytoskeleton; intracellular; cell part; intermediate filam…	structural molecule activity;	K12641	LMNA; lamin A/C	ssc05414 Dilated cardiomyopathy - Sus scrofa (pig); ssc05412 Arrhythmogenic right ventricular cardiomyopathy (ARVC) - Sus scrofa (pig); ssc04210 Apoptosis - Sus scrofa (pig); ssc05410 Hypertrophic cardiomyopathy (HCM) - Sus scrofa (pig);	IPR001322;	Lamin Tail Domain;
F1RLS1	Uncharacterized protein	2.38673	Up	0.0295	SPECC1L	Cytospin-A OS=Homo sapiens GN=SPECC1L PE=1 SV=2	Cytospin-A OS=Mus musculus GN=Specc1l PE=1 SV=1	124.95	mitochondria			protein binding; binding;				IPR001715;	Calponin homology domain;
F1RM07	Uncharacterized protein	0.627034	Down	0.00348	ARHGAP35	Rho GTPase-activating protein 35 OS=Homo sapiens GN=ARHGAP35 PE=1 SV=3	Rho GTPase-activating protein 35 OS=Mus musculus GN=Arhgap35 PE=1 SV=3	170.55	nucleus	regulation of cellular process; single organism signaling; cellular response to stimulus; signal transduction; regulation of biological process; cell communication; intracellular signal transduction; single-organism process; small GTPase mediated signal transduction; signaling; response to stimulus; cellular process; biological regulation;		nucleoside phosphate binding; nucleoside binding; ion binding; nucleotide binding; organic cyclic compound binding; heterocyclic compound binding; ribonucleoside binding; carbohydrate derivative binding; ribonucleotide binding; binding; purine ribonucleoside binding; anion binding; purine ribonucleotide binding; purine nucleoside binding; guanyl ribonucleotide binding; guanyl nucleotide binding; …				IPR002713; IPR027417; IPR008936; IPR000198; IPR032835;	FF domain; P-loop containing nucleoside triphosphate hydrolase; Rho GTPase activation protein; Rho GTPase-activating protein domain; Rho GTPase-activating protein, FF domain;
F1RM28	Uncharacterized protein	0.635823	Down	0.0183	NOVA2	RNA-binding protein Nova-2 OS=Homo sapiens GN=NOVA2 PE=1 SV=1	Protein Nova2 OS=Mus musculus GN=Nova2 PE=2 SV=1	55.316	nucleus			organic cyclic compound binding; heterocyclic compound binding; RNA binding; binding; nucleic acid binding;	K14944			IPR004087; IPR004088;	K Homology domain; K Homology domain, type 1;
F1RM45	Apolipoprotein E	0.354347	Down	4.35e-05	APOE			36.664	extracellular	lipid transport; single-organism process; lipid localization; organic substance transport; primary metabolic process; lipoprotein metabolic process; organic substance metabolic process; establishment of localization; transport; metabolic process; single-organism localization; protein metabolic process; macromolecule metabolic process; localization; macromolecule localization; single-organism tran…	extracellular region;	lipid binding; binding;	K04524	APOE; apolipoprotein E	ssc05010 Alzheimer's disease - Sus scrofa (pig);
F1RM55	Alpha-mannosidase	0.594374	Down	9.69e-05	MAN2A1			131.41	endoplasmic reticulum	single-organism carbohydrate metabolic process; metabolic process; single-organism metabolic process; small molecule metabolic process; monosaccharide metabolic process; mannose metabolic process; single-organism process; carbohydrate metabolic process; primary metabolic process; hexose metabolic process; organic substance metabolic process;		mannosidase activity; transition metal ion binding; catalytic activity; binding; ion binding; alpha-mannosidase activity; hydrolase activity, acting on glycosyl bonds; cation binding; metal ion binding; hydrolase activity, hydrolyzing O-glycosyl compounds; carbohydrate binding; hydrolase activity; zinc ion binding;	K01231	MAN2; alpha-mannosidase II [EC:3.2.1.114]	ssc00510 N-Glycan biosynthesis - Sus scrofa (pig); ssc01100 Metabolic pathways - Sus scrofa (pig);	IPR011013; IPR027291; IPR011330; IPR013780; IPR028995; IPR015341; IPR000602; IPR011682;	Galactose mutarotase-like domain; Glycoside hydrolase 38/57, N-terminal domain; Glycoside hydrolase/deacetylase, beta/alpha-barrel; Glycosyl hydrolase, all-beta; Glycoside hydrolase families 57/38, central domain; Glycoside hydrolase family 38, central domain; Glycoside hydrolase family 38, N-terminal domain; Glycosyl hydrolase family 38, C-terminal;
F1RM77	Uncharacterized protein	1.82074	Up	0.00242	USF2	Upstream stimulatory factor 2 OS=Homo sapiens GN=USF2 PE=2 SV=1	Upstream stimulatory factor 2 OS=Mus musculus GN=Usf2 PE=1 SV=1	36.967	nucleus			protein binding; binding; protein dimerization activity;	K09106			IPR011598;	Myc-type, basic helix-loop-helix (bHLH) domain;
F1RM86	Uncharacterized protein	0.189244	Down	0.0336	ADAMDEC1	ADAM DEC1 OS=Homo sapiens GN=ADAMDEC1 PE=1 SV=2	ADAM DEC1 OS=Mus musculus GN=Adamdec1 PE=2 SV=1	51.441	extracellular	proteolysis; metabolic process; macromolecule metabolic process; protein metabolic process; primary metabolic process; organic substance metabolic process;		endopeptidase activity; metalloendopeptidase activity; peptidase activity; catalytic activity; peptidase activity, acting on L-amino acid peptides; hydrolase activity; metallopeptidase activity;	K08634			IPR024079; IPR034027; IPR002870; IPR001762; IPR001590;	Metallopeptidase, catalytic domain; Reprolysin domain, adamalysin-type; Peptidase M12B, propeptide; Disintegrin domain; Peptidase M12B, ADAM/reprolysin;
F1RMA3	Uncharacterized protein	0.598266	Down	0.000712	CCAR2	Cell cycle and apoptosis regulator protein 2 OS=Homo sapiens GN=CCAR2 PE=1 SV=2	Cell cycle and apoptosis regulator protein 2 OS=Mus musculus GN=Ccar2 PE=1 SV=2	102.01	mitochondria							IPR011992; IPR025223; IPR025954;	EF-hand domain pair; S1-like RNA binding domain; DBC1/CARP1 catalytically inactive NUDIX hydrolase domain;
F1RMD6	Uncharacterized protein	0.654473	Down	0.00337	VPS36	Vacuolar protein-sorting-associated protein 36 OS=Homo sapiens GN=VPS36 PE=1 SV=1	Vacuolar protein-sorting-associated protein 36 OS=Mus musculus GN=Vps36 PE=1 SV=1	43.734	cytoplasm			phosphatidylinositol phosphate binding; phosphatidylinositol-3-phosphate binding; binding; phospholipid binding; phosphatidylinositol binding; ion binding; lipid binding; ubiquitin binding; anion binding; protein binding; ubiquitin-like protein binding;	K12190	VPS36; ESCRT-II complex subunit VPS36	ssc04144 Endocytosis - Sus scrofa (pig);	IPR011991; IPR011993; IPR021648;	Winged helix-turn-helix DNA-binding domain; PH domain-like; Vacuolar protein sorting protein 36, GLUE domain;
F1RMD8	Uncharacterized protein	1.8433	Up	0.0189	LOC100625564	"Phosphatidylinositol 3,4,5-trisphosphate 3-phosphatase TPTE2 OS=Homo sapiens GN=TPTE2 PE=1 SV=2"	"MCG118205, isoform CRA_c OS=Mus musculus GN=Tpte PE=4 SV=1"	55.043	plasma membrane	cellular protein metabolic process; primary metabolic process; protein dephosphorylation; dephosphorylation; cellular metabolic process; phosphate-containing compound metabolic process; organic substance metabolic process; metabolic process; phosphorus metabolic process; cellular macromolecule metabolic process; cellular protein modification process; protein metabolic process; macromolecule metab…		protein tyrosine phosphatase activity; catalytic activity; phosphoric ester hydrolase activity; phosphatase activity; binding; hydrolase activity, acting on ester bonds; protein binding; hydrolase activity; phosphoprotein phosphatase activity; protein tyrosine/serine/threonine phosphatase activity;	K18079			IPR029021; IPR003595; IPR029023; IPR000340; IPR014020; IPR000008;	Protein-tyrosine phosphatase-like; Protein-tyrosine phosphatase, catalytic; Tensin phosphatase, lipid phosphatase domain; Dual specificity phosphatase, catalytic domain; Tensin phosphatase, C2 domain; C2 domain;
F1RME2	Uncharacterized protein	1.56188	Up	0.0262	MRPS31	"28S ribosomal protein S31, mitochondrial OS=Homo sapiens GN=MRPS31 PE=1 SV=3"	"28S ribosomal protein S31, mitochondrial OS=Mus musculus GN=Mrps31 PE=2 SV=1"	43.954	mitochondria		intracellular organelle; ribosome; mitochondrial matrix; organellar small ribosomal subunit; mitochondrial part; intracellular non-membrane-bounded organelle; small ribosomal subunit; cytoplasm; intracellular organelle part; macromolecular complex; intracellular part; mitochondrial ribosome; cell; organellar ribosome; organelle part; mitochondrion; non-membrane-bounded organelle; organelle; intra…	structural constituent of ribosome; structural molecule activity;	K17410
F1RMH7	Uncharacterized protein	0.592423	Down	0.000628	UNC45A	Protein unc-45 homolog A OS=Homo sapiens GN=UNC45A PE=1 SV=1	Protein unc-45 homolog A OS=Mus musculus GN=Unc45a PE=1 SV=2	103.14	cyto_nucl			protein binding; binding;				IPR024660; IPR011990; IPR011989; IPR013026; IPR016024;	UNC-45/Cro1/She4, central domain; Tetratricopeptide-like helical domain; Armadillo-like helical; Tetratricopeptide repeat-containing domain; Armadillo-type fold;
F1RMJ4	Uncharacterized protein	0.62824	Down	0.000856	---	Ras GTPase-activating-like protein IQGAP1 OS=Homo sapiens GN=IQGAP1 PE=1 SV=1	Ras GTPase-activating-like protein IQGAP1 OS=Mus musculus GN=Iqgap1 PE=1 SV=2	96.838	mitochondria	regulation of cellular process; single organism signaling; cellular response to stimulus; signal transduction; regulation of biological process; cell communication; regulation of hydrolase activity; regulation of catalytic activity; single-organism process; regulation of molecular function; regulation of GTPase activity; signaling; response to stimulus; cellular process; biological regulation;		protein binding; binding;				IPR001936; IPR000593; IPR008936;	Ras GTPase-activating protein; RasGAP protein, C-terminal; Rho GTPase activation protein;
F1RMK7	Uncharacterized protein	2.43488	Up	0.0203	ZNF787	Zinc finger protein 787 OS=Homo sapiens GN=ZNF787 PE=1 SV=3	Zinc finger protein 787 OS=Mus musculus GN=Znf787 PE=2 SV=3	40.604	nucleus			organic cyclic compound binding; heterocyclic compound binding; binding; nucleic acid binding; ion binding; cation binding; metal ion binding;				IPR015880; IPR007087; IPR013087;	Zinc finger, C2H2-like; Zinc finger, C2H2; Zinc finger C2H2-type/integrase DNA-binding domain;
F1RMN3	Uncharacterized protein	0.623536	Down	0.0261	PPP6R1	Serine/threonine-protein phosphatase 6 regulatory subunit 1 OS=Homo sapiens GN=PPP6R1 PE=1 SV=5	Serine/threonine-protein phosphatase 6 regulatory subunit 1 OS=Mus musculus GN=Ppp6r1 PE=1 SV=1	96.452	nucleus			binding;	K15499			IPR016024;	Armadillo-type fold;
F1RMT5	Uncharacterized protein	0.631349	Down	0.00954	DIAPH1	Protein diaphanous homolog 1 OS=Homo sapiens GN=DIAPH1 PE=1 SV=2	Protein diaphanous homolog 1 OS=Mus musculus GN=Diap1 PE=2 SV=1	139.02	cyto_nucl	single-organism organelle organization; cellular component organization; actin cytoskeleton organization; organelle organization; actin filament-based process; single-organism cellular process; single-organism process; cytoskeleton organization; cellular process; cellular component organization or biogenesis;		small GTPase binding; Rho GTPase binding; cytoskeletal protein binding; Ras GTPase binding; binding; actin binding; protein binding; GTPase binding; enzyme binding;	K05740	DIAPH1; diaphanous 1	ssc04810 Regulation of actin cytoskeleton - Sus scrofa (pig); ssc04510 Focal adhesion - Sus scrofa (pig); ssc04933 AGE-RAGE signaling pathway in diabetic complications - Sus scrofa (pig);	IPR014767; IPR010473; IPR010472; IPR014768; IPR015425; IPR016024; IPR010465; IPR009408;	Diaphanous autoregulatory (DAD) domain; Formin, GTPase-binding domain; Formin, FH3 domain; Rho GTPase-binding/formin homology 3 (GBD/FH3) domain; Formin, FH2 domain; Armadillo-type fold; DRF autoregulatory; Formin Homology 1;
F1RMU2	Uncharacterized protein	1.88224	Up	1.11e-05	TAF7	Transcription initiation factor TFIID subunit 7 OS=Homo sapiens GN=TAF7 PE=1 SV=1	Transcription initiation factor TFIID subunit 7 OS=Mus musculus GN=Taf7 PE=1 SV=1	40.245	nucleus	cellular aromatic compound metabolic process; nucleic acid-templated transcription; DNA-templated transcription, initiation; biosynthetic process; cellular metabolic process; organic substance metabolic process; metabolic process; heterocycle metabolic process; aromatic compound biosynthetic process; nucleobase-containing compound metabolic process; cellular nitrogen compound metabolic process; m…	intracellular organelle; DNA-directed RNA polymerase complex; nuclear DNA-directed RNA polymerase complex; transferase complex, transferring phosphorus-containing groups; intracellular organelle part; RNA polymerase complex; macromolecular complex; nuclear lumen; intracellular part; transferase complex; cell; transcription factor complex; nuclear transcription factor complex; organelle part; DNA-…		K03132	TAF7; transcription initiation factor TFIID subunit 7	ssc03022 Basal transcription factors - Sus scrofa (pig);	IPR006751;	TAFII55 protein, conserved region;
F1RMV8	Uncharacterized protein	1.71488	Up	0.0409	CADM4	Cell adhesion molecule 4 OS=Homo sapiens GN=CADM4 PE=1 SV=1	Cell adhesion molecule 4 OS=Mus musculus GN=Cadm4 PE=1 SV=1	43.26	plasma membrane			protein binding; binding;	K06783			IPR003598; IPR007110; IPR013783; IPR003585; IPR013162; IPR013106; IPR003599;	Immunoglobulin subtype 2; Immunoglobulin-like domain; Immunoglobulin-like fold; Neurexin/syndecan/glycophorin C; CD80-like, immunoglobulin C2-set; Immunoglobulin V-set domain; Immunoglobulin subtype;
F1RN41	Uncharacterized protein	0.43103	Down	0.000209	F10	Coagulation factor X OS=Homo sapiens GN=F10 PE=1 SV=2	Coagulation factor X OS=Mus musculus GN=F10 PE=2 SV=1	53.186	extracellular	single-multicellular organism process; blood coagulation; regulation of biological quality; regulation of body fluid levels; response to stress; single-organism process; primary metabolic process; response to stimulus; multicellular organismal process; hemostasis; organic substance metabolic process; response to wounding; metabolic process; wound healing; proteolysis; macromolecule metabolic proc…	extracellular region;	serine-type endopeptidase activity; endopeptidase activity; peptidase activity; catalytic activity; serine hydrolase activity; binding; ion binding; serine-type peptidase activity; cation binding; metal ion binding; peptidase activity, acting on L-amino acid peptides; protein binding; hydrolase activity; calcium ion binding;	K01314	F10; coagulation factor X [EC:3.4.21.6]	ssc04610 Complement and coagulation cascades - Sus scrofa (pig);	IPR009003; IPR017857; IPR000294; IPR001254; IPR001881; IPR000742;	Peptidase S1, PA clan; Coagulation factor, subgroup, Gla domain; Gamma-carboxyglutamic acid-rich (GLA) domain; Serine proteases, trypsin domain; EGF-like calcium-binding domain; EGF-like domain;
F1RN52	Uncharacterized protein	0.317521	Down	0.00171	---	F-box/LRR-repeat protein 17 OS=Homo sapiens GN=FBXL17 PE=2 SV=3	F-box/LRR-repeat protein 17 OS=Mus musculus GN=Fbxl17 PE=2 SV=3	53.56	nucleus			protein binding; binding;	K10283			IPR001810; IPR032675;	F-box domain; Leucine-rich repeat domain, L domain-like;
F1RN59	Uncharacterized protein	0.563434	Down	0.000378	PAM	Peptidyl-glycine alpha-amidating monooxygenase OS=Homo sapiens GN=PAM PE=1 SV=2	Peptidyl-glycine alpha-amidating monooxygenase OS=Mus musculus GN=Pam PE=1 SV=2	109.59	extracellular	metabolic process; peptide metabolic process; oxidation-reduction process; single-organism metabolic process; single-organism process; nitrogen compound metabolic process; cellular nitrogen compound metabolic process; cellular amide metabolic process; cellular metabolic process; cellular process; organic substance metabolic process; organonitrogen compound metabolic process;	membrane;	transition metal ion binding; catalytic activity; binding; ion binding; oxidoreductase activity, acting on paired donors, with incorporation or reduction of molecular oxygen; metal ion binding; cation binding; protein binding; copper ion binding; monooxygenase activity; oxidoreductase activity, acting on paired donors, with incorporation or reduction of molecular oxygen, reduced ascorbate as one …	K00504			IPR008977; IPR014784; IPR000323; IPR024548; IPR011042;	PHM/PNGase F domain; Copper type II, ascorbate-dependent monooxygenase-like, C-terminal; Copper type II, ascorbate-dependent monooxygenase, N-terminal; Copper type II ascorbate-dependent monooxygenase, C-terminal; Six-bladed beta-propeller, TolB-like;
F1RN72	Uncharacterized protein	3.06496	Up	0.00256	NSRP1	Nuclear speckle splicing regulatory protein 1 OS=Homo sapiens GN=NSRP1 PE=1 SV=1	Nuclear speckle splicing regulatory protein 1 OS=Mus musculus GN=Nsrp1 PE=1 SV=1	65.988	nucleus				K13206			IPR018612;	Domain of unknown function DUF2040;
F1RN89	Uncharacterized protein	2.7988	Up	0.00509	NUFIP2	Nuclear fragile X mental retardation-interacting protein 2 OS=Homo sapiens GN=NUFIP2 PE=1 SV=1	Nuclear fragile X mental retardation-interacting protein 2 OS=Mus musculus GN=Nufip2 PE=1 SV=1	76.103	nucleus			organic cyclic compound binding; heterocyclic compound binding; RNA binding; binding; nucleic acid binding;
F1RND9	Uncharacterized protein	0.452095	Down	0.00374	---	Gamma-interferon-inducible protein 16 OS=Homo sapiens GN=IFI16 PE=1 SV=3	Interferon-activable protein 204 OS=Mus musculus GN=Ifi204 PE=4 SV=1	87.174	nucleus				K20914	IFI16; gamma-interferon-inducible protein 16	ssc04621 NOD-like receptor signaling pathway - Sus scrofa (pig);	IPR004021; IPR004020;	HIN-200/IF120x; DAPIN domain;
F1RNG9	tRNA-splicing endonuclease subunit Sen34	0.642564	Down	0.0286	TSEN34			33.839	mitochondria	RNA processing; ncRNA processing; cellular aromatic compound metabolic process; organic cyclic compound metabolic process; nitrogen compound metabolic process; primary metabolic process; cellular metabolic process; organic substance metabolic process; RNA metabolic process; metabolic process; RNA splicing, via endonucleolytic cleavage and ligation; tRNA metabolic process; tRNA splicing, via endon…	intracellular organelle; endonuclease complex; intracellular organelle part; macromolecular complex; intracellular part; cell; organelle part; tRNA-intron endonuclease complex; organelle; intracellular membrane-bounded organelle; nucleus; catalytic complex; cell part; intracellular; membrane-bounded organelle; nuclear part; endoribonuclease complex;	endoribonuclease activity; hydrolase activity; endonuclease activity, active with either ribo- or deoxyribonucleic acids and producing 3'-phosphomonoesters; tRNA-specific ribonuclease activity; heterocyclic compound binding; organic cyclic compound binding; catalytic activity; tRNA-intron endonuclease activity; endoribonuclease activity, producing 3'-phosphomonoesters; binding; nuclease activity;…	K15323			IPR006677; IPR011856;	tRNA intron endonuclease, catalytic domain-like; tRNA endonuclease-like domain;
F1RNH3	Uncharacterized protein	2.36118	Up	0.00684	CNOT3	CCR4-NOT transcription complex subunit 3 OS=Homo sapiens GN=CNOT3 PE=1 SV=1	CCR4-NOT transcription complex subunit 3 OS=Mus musculus GN=Cnot3 PE=1 SV=1	76.69	nucleus	regulation of cellular process; regulation of gene expression; regulation of transcription, DNA-templated; regulation of cellular biosynthetic process; regulation of primary metabolic process; regulation of macromolecule metabolic process; regulation of nucleobase-containing compound metabolic process; regulation of macromolecule biosynthetic process; regulation of cellular metabolic process; reg…	organelle; intracellular membrane-bounded organelle; intracellular organelle; nucleus; cell part; intracellular; intracellular part; membrane-bounded organelle; cell;		K12580	CNOT3; CCR4-NOT transcription complex subunit 3	ssc03018 RNA degradation - Sus scrofa (pig);	IPR007282; IPR007207;	NOT2/NOT3/NOT5; CCR4-Not complex component, Not N-terminal domain;
F1RNN0	Vacuolar protein sorting-associated protein 29	0.614045	Down	0.000411	VPS29			20.917	cytoplasm				K18467	VPS29; vacuolar protein sorting-associated protein 29	ssc04144 Endocytosis - Sus scrofa (pig);	IPR029052; IPR024654;	Metallo-dependent phosphatase-like; Calcineurin-like phosphoesterase domain, lpxH type;
F1RNP1	Uncharacterized protein	0.632836	Down	0.00234	ZKSCAN1	Zinc finger protein with KRAB and SCAN domains 1 OS=Homo sapiens GN=ZKSCAN1 PE=1 SV=3	Zinc finger protein with KRAB and SCAN domains 1 OS=Mus musculus GN=Zkscan1 PE=2 SV=1	63.346	nucleus	regulation of cellular process; regulation of gene expression; regulation of transcription, DNA-templated; regulation of cellular biosynthetic process; regulation of primary metabolic process; regulation of macromolecule metabolic process; regulation of nucleobase-containing compound metabolic process; regulation of macromolecule biosynthetic process; regulation of cellular metabolic process; reg…	cell; intracellular; cell part;	organic cyclic compound binding; heterocyclic compound binding; binding; nucleic acid binding; nucleic acid binding transcription factor activity; ion binding; cation binding; metal ion binding; transcription factor activity, sequence-specific DNA binding;	K09229			IPR015880; IPR008916; IPR007087; IPR001909; IPR013087; IPR003309;	Zinc finger, C2H2-like; Retrovirus capsid, C-terminal; Zinc finger, C2H2; Krueppel-associated box; Zinc finger C2H2-type/integrase DNA-binding domain; SCAN domain;
F1RNS7	Uncharacterized protein	0.507196	Down	0.000433	ARPC1B	Actin-related protein 2/3 complex subunit 1B OS=Homo sapiens GN=ARPC1B PE=1 SV=3	Actin-related protein 2/3 complex subunit 1B OS=Mus musculus GN=Arpc1b PE=2 SV=4	28.414	cyto_nucl			protein binding; binding;				IPR017986; IPR015943;	WD40-repeat-containing domain; WD40/YVTN repeat-like-containing domain;
F1RNS8	Uncharacterized protein	3.41588	Up	0.00169	PDAP1	28 kDa heat- and acid-stable phosphoprotein OS=Homo sapiens GN=PDAP1 PE=1 SV=1	28 kDa heat- and acid-stable phosphoprotein OS=Mus musculus GN=Pdap1 PE=1 SV=1	20.688	nucleus							IPR019380;	Casein kinase substrate, phosphoprotein PP28;
F1RNX2	Programmed cell death protein 5	4.11289	Up	0.000417	PDCD5			14.227	cytoplasm			organic cyclic compound binding; heterocyclic compound binding; DNA binding; binding; nucleic acid binding;	K06875
F1RP01	Uncharacterized protein	0.640961	Down	0.000356	RASA1	Ras GTPase-activating protein 1 OS=Homo sapiens GN=RASA1 PE=1 SV=1	Protein Rasa1 OS=Mus musculus GN=Rasa1 PE=2 SV=1	115.87	cytoplasm	regulation of cellular process; single organism signaling; cellular response to stimulus; signal transduction; regulation of biological process; cell communication; regulation of hydrolase activity; regulation of catalytic activity; single-organism process; regulation of molecular function; regulation of GTPase activity; signaling; response to stimulus; cellular process; biological regulation;		protein binding; binding;	K04352	RASA1; Ras GTPase-activating protein 1	ssc04360 Axon guidance - Sus scrofa (pig); ssc04014 Ras signaling pathway - Sus scrofa (pig); ssc04010 MAPK signaling pathway - Sus scrofa (pig);	IPR001936; IPR000980; IPR001452; IPR011993; IPR008936; IPR000008; IPR001849;	Ras GTPase-activating protein; SH2 domain; SH3 domain; PH domain-like; Rho GTPase activation protein; C2 domain; Pleckstrin homology domain;
F1RP04	Uncharacterized protein	2.26833	Up	5.15e-06	GPT2	Alanine aminotransferase 2 OS=Homo sapiens GN=GPT2 PE=1 SV=1	Alanine aminotransferase 2 OS=Mus musculus GN=Gpt2 PE=1 SV=1	58.054	mitochondria	biosynthetic process; metabolic process;		organic cyclic compound binding; heterocyclic compound binding; catalytic activity; binding; ion binding; anion binding; cofactor binding; pyridoxal phosphate binding;	K00814	GPT; alanine transaminase [EC:2.6.1.2]	ssc01210 2-Oxocarboxylic acid metabolism - Sus scrofa (pig); ssc00250 Alanine, aspartate and glutamate metabolism - Sus scrofa (pig); ssc00220 Arginine biosynthesis - Sus scrofa (pig); ssc01200 Carbon metabolism - Sus scrofa (pig); ssc01230 Biosynthesis of amino acids - Sus scrofa (pig); ssc01100 Metabolic pathways - Sus scrofa (pig);	IPR004839; IPR015424; IPR015422; IPR015421;	Aminotransferase, class I/classII; Pyridoxal phosphate-dependent transferase; Pyridoxal phosphate-dependent transferase, major region, subdomain 2; Pyridoxal phosphate-dependent transferase, major region, subdomain 1;
F1RP07	Uncharacterized protein	0.579084	Down	0.023	PHKB	Phosphorylase b kinase regulatory subunit beta OS=Homo sapiens GN=PHKB PE=1 SV=3	Phosphorylase b kinase regulatory subunit beta OS=Mus musculus GN=Phkb PE=1 SV=1	124.38	cytoplasm			catalytic activity;	K07190	PHKA_B; phosphorylase kinase alpha/beta subunit	ssc04922 Glucagon signaling pathway - Sus scrofa (pig); ssc04910 Insulin signaling pathway - Sus scrofa (pig); ssc04020 Calcium signaling pathway - Sus scrofa (pig);	IPR008928;	Six-hairpin glycosidase-like;
F1RP13	Uncharacterized protein	0.427694	Down	0.00542	GGACT	Gamma-glutamylaminecyclotransferase OS=Homo sapiens GN=GGACT PE=1 SV=2	Gamma-glutamylaminecyclotransferase OS=Mus musculus GN=Ggact PE=1 SV=1	16.819	mitochondria				K19761			IPR013024; IPR009288;	Gamma-glutamyl cyclotransferase-like; Gamma-glutamylcyclotransferase, AIG2-like;
F1RPQ3	Uncharacterized protein	0.54552	Down	0.00544	PSMD14	26S proteasome non-ATPase regulatory subunit 14 OS=Homo sapiens GN=PSMD14 PE=1 SV=1	26S proteasome non-ATPase regulatory subunit 14 OS=Mus musculus GN=Psmd14 PE=1 SV=2	34.799	cytoplasm			protein binding; binding;	K03030	PSMD14; 26S proteasome regulatory subunit N11	ssc05169 Epstein-Barr virus infection - Sus scrofa (pig); ssc03050 Proteasome - Sus scrofa (pig);	IPR000555; IPR024969;	JAB1/MPN/MOV34 metalloenzyme domain; Rpn11/EIF3F, C-terminal;
F1RPT3	Uncharacterized protein	0.482274	Down	0.0209	TANC1	Protein TANC1 OS=Homo sapiens GN=TANC1 PE=1 SV=3	Protein TANC1 OS=Mus musculus GN=Tanc1 PE=2 SV=2	192.35	nucleus			protein binding; binding;				IPR011990; IPR020683; IPR013026;	Tetratricopeptide-like helical domain; Ankyrin repeat-containing domain; Tetratricopeptide repeat-containing domain;
F1RPT4	Uncharacterized protein	2.22494	Up	0.00264	DAPL1	Death-associated protein-like 1 OS=Homo sapiens GN=DAPL1 PE=1 SV=2	Death-associated protein-like 1 OS=Mus musculus GN=Dapl1 PE=1 SV=1	11.889	cytoplasm
F1RPV1	Uncharacterized protein	0.465097	Down	0.00174	TIPRL	TIP41-like protein OS=Homo sapiens GN=TIPRL PE=1 SV=2	TIP41-like protein OS=Mus musculus GN=Tiprl PE=2 SV=1	32.405	cytoskeleton				K17607
F1RPV8	Uncharacterized protein	0.571297	Down	0.00767	NME7	Nucleoside diphosphate kinase 7 OS=Homo sapiens GN=NME7 PE=1 SV=1	Nucleoside diphosphate kinase 7 OS=Mus musculus GN=Nme7 PE=2 SV=1	29.425	cyto_nucl	purine nucleoside metabolic process; nucleoside metabolic process; pyrimidine ribonucleoside biosynthetic process; nucleoside diphosphate phosphorylation; pyrimidine nucleoside triphosphate metabolic process; nucleotide metabolic process; single-organism process; purine ribonucleoside biosynthetic process; nucleoside biosynthetic process; biosynthetic process; nucleotide phosphorylation; CTP meta…		kinase activity; catalytic activity; nucleoside diphosphate kinase activity; nucleobase-containing compound kinase activity; transferase activity; phosphotransferase activity, phosphate group as acceptor; transferase activity, transferring phosphorus-containing groups;	K00940	ndk; nucleoside-diphosphate kinase [EC:2.7.4.6]	ssc00230 Purine metabolism - Sus scrofa (pig); ssc00240 Pyrimidine metabolism - Sus scrofa (pig); ssc01100 Metabolic pathways - Sus scrofa (pig);	IPR010554; IPR006602;	Domain of unknown function DUF1126; Uncharacterised domain DM10;
F1RPW8	Uncharacterized protein	1.8378	Up	0.00211	ASRGL1	Isoaspartyl peptidase/L-asparaginase OS=Homo sapiens GN=ASRGL1 PE=1 SV=2	Isoaspartyl peptidase/L-asparaginase OS=Mus musculus GN=Asrgl1 PE=1 SV=1	32.403	cytoplasm			hydrolase activity; asparaginase activity; hydrolase activity, acting on carbon-nitrogen (but not peptide) bonds, in linear amides; catalytic activity; hydrolase activity, acting on carbon-nitrogen (but not peptide) bonds;	K13051			IPR029055;	Nucleophile aminohydrolases, N-terminal;
F1RQ06	Uncharacterized protein	1.84749	Up	1.6e-05	FKBP2	Peptidyl-prolyl cis-trans isomerase FKBP2 OS=Homo sapiens GN=FKBP2 PE=1 SV=2	Peptidyl-prolyl cis-trans isomerase FKBP2 OS=Mus musculus GN=Fkbp2 PE=1 SV=1	15.374	extracellular				K09569			IPR001179;	FKBP-type peptidyl-prolyl cis-trans isomerase domain;
F1RQ75	Coagulation factor IX	0.506386	Down	0.000239	F9			52.036	extracellular	single-multicellular organism process; blood coagulation; regulation of biological quality; regulation of body fluid levels; response to stress; single-organism process; primary metabolic process; response to stimulus; multicellular organismal process; hemostasis; organic substance metabolic process; response to wounding; metabolic process; wound healing; proteolysis; macromolecule metabolic proc…	extracellular region;	serine-type endopeptidase activity; endopeptidase activity; peptidase activity; catalytic activity; serine hydrolase activity; binding; ion binding; serine-type peptidase activity; cation binding; metal ion binding; peptidase activity, acting on L-amino acid peptides; protein binding; hydrolase activity; calcium ion binding;	K01321	F9; coagulation factor IX (Christmas factor) [EC:3.4.21.22]	ssc04610 Complement and coagulation cascades - Sus scrofa (pig);	IPR009003; IPR000294; IPR017857; IPR001254; IPR001881; IPR000742;	Peptidase S1, PA clan; Gamma-carboxyglutamic acid-rich (GLA) domain; Coagulation factor, subgroup, Gla domain; Serine proteases, trypsin domain; EGF-like calcium-binding domain; EGF-like domain;
F1RQ90	Uncharacterized protein	1.67524	Up	0.00161	RBMX	"RNA-binding motif protein, X chromosome OS=Homo sapiens GN=RBMX PE=1 SV=3"	"RNA-binding motif protein, X chromosome OS=Mus musculus GN=Rbmx PE=1 SV=1"	42.274	nucleus			organic cyclic compound binding; heterocyclic compound binding; nucleoside phosphate binding; binding; nucleic acid binding; nucleotide binding; small molecule binding;	K12885	RBMX; heterogeneous nuclear ribonucleoprotein G	ssc03040 Spliceosome - Sus scrofa (pig);	IPR000504; IPR012604; IPR012677; IPR003954;	RNA recognition motif domain; RBM1CTR; Nucleotide-binding alpha-beta plait domain; RNA recognition motif domain, eukaryote;
F1RQ91	40S ribosomal protein S4	0.591234	Down	0.0019	RPS4X			29.597	cytoplasm	peptide metabolic process; peptide biosynthetic process; cellular protein metabolic process; nitrogen compound metabolic process; biosynthetic process; cellular amide metabolic process; primary metabolic process; organonitrogen compound biosynthetic process; organic substance biosynthetic process; cellular metabolic process; cellular biosynthetic process; organic substance metabolic process; meta…	ribosome; organelle; intracellular organelle; intracellular non-membrane-bounded organelle; cell part; intracellular; cytoplasm; macromolecular complex; intracellular part; ribonucleoprotein complex; cell; intracellular ribonucleoprotein complex; cytoplasmic part; non-membrane-bounded organelle;	organic cyclic compound binding; heterocyclic compound binding; RNA binding; binding; nucleic acid binding; structural molecule activity; structural constituent of ribosome;	K02987	RP-S4e; small subunit ribosomal protein S4e	ssc03010 Ribosome - Sus scrofa (pig);	IPR013845; IPR005824; IPR032277; IPR002942; IPR013843;	Ribosomal protein S4e, central region; KOW; 40S ribosomal protein S4, C-terminal domain; RNA-binding S4 domain; Ribosomal protein S4e, N-terminal;
F1RQC1	Uncharacterized protein	2.06475	Up	0.00322	FAM114A2	Protein FAM114A2 OS=Homo sapiens GN=FAM114A2 PE=1 SV=4	Protein FAM114A2 OS=Mus musculus GN=Fam114a2 PE=2 SV=2	54.634	nucleus
F1RQC5	Uncharacterized protein	1.77279	Up	0.00573	LARP1	La-related protein 1 OS=Homo sapiens GN=LARP1 PE=1 SV=2	La-related protein 1 OS=Mus musculus GN=Larp1 PE=1 SV=2	110.37	nucleus				K18757			IPR011991; IPR006630;	Winged helix-turn-helix DNA-binding domain; RNA-binding protein Lupus La;
F1RQE9	Uncharacterized protein	0.649854	Down	0.000193	CYFIP2	Cytoplasmic FMR1-interacting protein 2 OS=Homo sapiens GN=CYFIP2 PE=1 SV=2	Cytoplasmic FMR1-interacting protein 2 OS=Mus musculus GN=Cyfip2 PE=1 SV=2	148.61	cytoplasm				K05749	CYFIP; cytoplasmic FMR1 interacting protein	ssc03013 RNA transport - Sus scrofa (pig); ssc04810 Regulation of actin cytoskeleton - Sus scrofa (pig);
F1RQF4	tRNA(His) guanylyltransferase	0.314187	Down	1.08e-05	THG1L			33.728	cytoplasm	RNA processing; ncRNA processing; cellular aromatic compound metabolic process; organic cyclic compound metabolic process; nitrogen compound metabolic process; primary metabolic process; RNA modification; cellular metabolic process; organic substance metabolic process; RNA metabolic process; metabolic process; tRNA metabolic process; heterocycle metabolic process; nucleic acid metabolic process; …		magnesium ion binding; tRNA guanylyltransferase activity; nucleotidyltransferase activity; guanylyltransferase activity; catalytic activity; binding; ion binding; metal ion binding; cation binding; RNA guanylyltransferase activity; transferase activity; transferase activity, transferring phosphorus-containing groups;	K10761			IPR024956; IPR025845;	tRNAHis guanylyltransferase catalytic domain; Thg1 C-terminal domain;
F1RQF6	Uncharacterized protein	1.69397	Up	0.00918	CLINT1	Clathrin interactor 1 OS=Homo sapiens GN=CLINT1 PE=1 SV=1	Clathrin interactor 1 OS=Mus musculus GN=Clint1 PE=4 SV=1	69.973	nucleus							IPR013809; IPR008942;	ENTH domain; ENTH/VHS;
F1RQI0	Uncharacterized protein	0.310643	Down	0.000498	---	Collagen alpha-1(XII) chain OS=Homo sapiens GN=COL12A1 PE=1 SV=2	Collagen alpha-1(XII) chain OS=Mus musculus GN=Col12a1 PE=2 SV=3	102.04	cyto_nucl			protein binding; binding;	K08132	COL12A; collagen, type XII, alpha	ssc04974 Protein digestion and absorption - Sus scrofa (pig);	IPR013783; IPR003961; IPR013320; IPR001791; IPR002035;	Immunoglobulin-like fold; Fibronectin type III; Concanavalin A-like lectin/glucanase domain; Laminin G domain; von Willebrand factor, type A;
F1RQM0	Uncharacterized protein	0.320433	Down	0.00276	TPBG	Trophoblast glycoprotein OS=Homo sapiens GN=TPBG PE=1 SV=1	Trophoblast glycoprotein OS=Mus musculus GN=Tpbg PE=1 SV=3	45.751	mitochondria			protein binding; binding;				IPR000483; IPR000372; IPR032675;	Cysteine-rich flanking region, C-terminal; Leucine-rich repeat N-terminal domain; Leucine-rich repeat domain, L domain-like;
F1RQM2	Phosphoacetylglucosamine mutase	0.657507	Down	0.0023	PGM3			59.474	cytoplasm	metabolic process; carbohydrate metabolic process; primary metabolic process; organic substance metabolic process;		magnesium ion binding; isomerase activity; phosphoacetylglucosamine mutase activity; catalytic activity; binding; intramolecular transferase activity, phosphotransferases; ion binding; metal ion binding; cation binding; intramolecular transferase activity;	K01836	PGM3; phosphoacetylglucosamine mutase [EC:5.4.2.3]	ssc00520 Amino sugar and nucleotide sugar metabolism - Sus scrofa (pig); ssc01100 Metabolic pathways - Sus scrofa (pig);	IPR005843; IPR016055; IPR005844;	Alpha-D-phosphohexomutase, C-terminal; Alpha-D-phosphohexomutase, alpha/beta/alpha I/II/III; Alpha-D-phosphohexomutase, alpha/beta/alpha domain I;
F1RQR0	Uncharacterized protein	1.66972	Up	0.000162	SF1	Splicing factor 1 OS=Homo sapiens GN=SF1 PE=1 SV=4	Splicing factor 1 OS=Mus musculus GN=Sf1 PE=2 SV=1	68.315	nucleus			organic cyclic compound binding; heterocyclic compound binding; RNA binding; transition metal ion binding; binding; ion binding; nucleic acid binding; metal ion binding; cation binding; zinc ion binding;	K13095			IPR004087; IPR032570; IPR004088; IPR001878;	K Homology domain; Splicing factor 1, helix-hairpin domain; K Homology domain, type 1; Zinc finger, CCHC-type;
F1RQS9	Uncharacterized protein	0.570922	Down	0.0222	SNX15	Sorting nexin-15 OS=Homo sapiens GN=SNX15 PE=1 SV=1	Sorting nexin-15 OS=Mus musculus GN=Snx15 PE=2 SV=1	39.155	cytoplasm			lipid binding; anion binding; binding; phosphatidylinositol binding; phospholipid binding; ion binding;	K17927			IPR007330; IPR001683;	MIT; Phox homologous domain;
F1RQW2	Uncharacterized protein	0.635661	Down	0.0153	C4A	Complement C4-A OS=Homo sapiens GN=C4A PE=1 SV=2	Complement C4-B OS=Mus musculus GN=C4b PE=1 SV=3	192.43	plasma membrane		extracellular space; extracellular region part; extracellular region;	enzyme regulator activity; binding; peptidase inhibitor activity; peptidase regulator activity; protein binding; endopeptidase regulator activity; enzyme inhibitor activity; molecular function regulator; endopeptidase inhibitor activity;	K03989	C4; complement component 4	ssc05150 Staphylococcus aureus infection - Sus scrofa (pig); ssc05133 Pertussis - Sus scrofa (pig); ssc04610 Complement and coagulation cascades - Sus scrofa (pig); ssc05322 Systemic lupus erythematosus - Sus scrofa (pig);	IPR008993; IPR001599; IPR011626; IPR000020; IPR002890; IPR011625; IPR009048; IPR001134; IPR018933; IPR008930; IPR019565; IPR018081;	Tissue inhibitor of metalloproteinases-like, OB-fold; Alpha-2-macroglobulin; Alpha-macroglobulin complement component; Anaphylatoxin/fibulin; Alpha-2-macroglobulin, N-terminal; Alpha-2-macroglobulin, N-terminal 2; Alpha-macroglobulin, receptor-binding; Netrin domain; Netrin module, non-TIMP type; Terpenoid cyclases/protein prenyltransferase alpha-alpha toroid; Alpha-2-macroglobulin, thiol-ester b…
F1RQW4	Uncharacterized protein	0.607299	Down	0.0021	SKIV2L	Helicase SKI2W OS=Homo sapiens GN=SKIV2L PE=1 SV=3	Protein Skiv2l OS=Mus musculus GN=Skiv2l PE=2 SV=1	137.64	cytoplasm	cellular macromolecule catabolic process; cellular aromatic compound metabolic process; organic cyclic compound metabolic process; nitrogen compound metabolic process; primary metabolic process; cellular metabolic process; organic substance metabolic process; RNA catabolic process; RNA metabolic process; organic substance catabolic process; cellular nitrogen compound catabolic process; aromatic c…		RNA binding; ATP binding; nucleoside phosphate binding; helicase activity; nucleoside binding; ion binding; hydrolase activity, acting on acid anhydrides; hydrolase activity; nucleotide binding; nucleoside-triphosphatase activity; heterocyclic compound binding; organic cyclic compound binding; ribonucleoside binding; carbohydrate derivative binding; RNA helicase activity; pyrophosphatase activity…	K12599	SKI2; antiviral helicase SKI2 [EC:3.6.4.-]	ssc03018 RNA degradation - Sus scrofa (pig);	IPR011545; IPR012961; IPR025696; IPR014001; IPR027417; IPR001650;	DEAD/DEAH box helicase domain; ATP-dependent RNA helicase Ski2, C-terminal; rRNA-processing arch domain; Helicase superfamily 1/2, ATP-binding domain; P-loop containing nucleoside triphosphate hydrolase; Helicase, C-terminal;
F1RQW6	Complement factor B	0.649346	Down	0.00092	CFB			85.878	extracellular	activation of immune response; immune effector process; protein activation cascade; humoral immune response; immune system process; primary metabolic process; response to stimulus; positive regulation of biological process; regulation of immune response; organic substance metabolic process; complement activation; metabolic process; regulation of biological process; positive regulation of immune s…	extracellular region;	serine-type endopeptidase activity; endopeptidase activity; peptidase activity; catalytic activity; serine hydrolase activity; serine-type peptidase activity; peptidase activity, acting on L-amino acid peptides; hydrolase activity;	K01335	CFB; component factor B [EC:3.4.21.47]	ssc05150 Staphylococcus aureus infection - Sus scrofa (pig); ssc04610 Complement and coagulation cascades - Sus scrofa (pig);	IPR009003; IPR000436; IPR001254; IPR002035;	Peptidase S1, PA clan; Sushi/SCR/CCP domain; Serine proteases, trypsin domain; von Willebrand factor, type A;
F1RQZ1	Uncharacterized protein	1.75889	Up	0.00447	---	G patch domain-containing protein 8 OS=Homo sapiens GN=GPATCH8 PE=1 SV=2	G patch domain-containing protein 8 OS=Mus musculus GN=Gpatch8 PE=2 SV=1	53.924	nucleus
F1RR16	Uncharacterized protein	2.18634	Up	0.000762	ATAD2	ATPase family AAA domain-containing protein 2 OS=Homo sapiens GN=ATAD2 PE=1 SV=1	ATPase family AAA domain-containing protein 2 OS=Mus musculus GN=Atad2 PE=3 SV=1	158.07	cytoplasm			ATP binding; nucleoside phosphate binding; nucleoside binding; ion binding; protein binding; nucleotide binding; organic cyclic compound binding; heterocyclic compound binding; ribonucleoside binding; carbohydrate derivative binding; ribonucleotide binding; binding; purine ribonucleoside binding; anion binding; purine ribonucleotide binding; adenyl ribonucleotide binding; adenyl nucleotide bindin…				IPR003959; IPR003593; IPR027417; IPR001487;	ATPase, AAA-type, core; AAA+ ATPase domain; P-loop containing nucleoside triphosphate hydrolase; Bromodomain;
F1RR19	Uncharacterized protein	2.00398	Up	3.82e-05	HEXIM1	Protein HEXIM1 OS=Homo sapiens GN=HEXIM1 PE=1 SV=1	Protein HEXIM1 OS=Mus musculus GN=Hexim1 PE=1 SV=1	39.153	nucleus	regulation of cellular process; regulation of macromolecule metabolic process; regulation of nucleobase-containing compound metabolic process; negative regulation of cellular process; negative regulation of cellular metabolic process; negative regulation of biological process; negative regulation of RNA metabolic process; negative regulation of transcription, DNA-templated; regulation of RNA bios…	organelle; intracellular membrane-bounded organelle; intracellular organelle; nucleus; cell part; intracellular; cytoplasm; intracellular part; membrane-bounded organelle; cell;	organic cyclic compound binding; heterocyclic compound binding; protein serine/threonine kinase inhibitor activity; RNA binding; enzyme regulator activity; cyclin-dependent protein serine/threonine kinase regulator activity; kinase inhibitor activity; binding; nucleic acid binding; cyclin-dependent protein serine/threonine kinase inhibitor activity; protein kinase inhibitor activity; kinase regul…	K15189
F1RR20	Uncharacterized protein	1.70239	Up	0.0409	HEXIM2	Protein HEXIM2 OS=Homo sapiens GN=HEXIM2 PE=1 SV=1	Protein HEXIM2 OS=Mus musculus GN=Hexim2 PE=2 SV=1	33.022	nucleus	regulation of cellular process; regulation of macromolecule metabolic process; regulation of nucleobase-containing compound metabolic process; negative regulation of cellular process; negative regulation of cellular metabolic process; negative regulation of biological process; negative regulation of RNA metabolic process; negative regulation of transcription, DNA-templated; regulation of RNA bios…	organelle; intracellular membrane-bounded organelle; intracellular organelle; nucleus; cell part; intracellular; cytoplasm; intracellular part; membrane-bounded organelle; cell;	organic cyclic compound binding; heterocyclic compound binding; protein serine/threonine kinase inhibitor activity; RNA binding; enzyme regulator activity; cyclin-dependent protein serine/threonine kinase regulator activity; kinase inhibitor activity; binding; nucleic acid binding; cyclin-dependent protein serine/threonine kinase inhibitor activity; protein kinase inhibitor activity; kinase regul…	K15189
F1RR45	Uncharacterized protein	1.54989	Up	0.00152	CRAT	Carnitine O-acetyltransferase OS=Homo sapiens GN=CRAT PE=1 SV=5	Carnitine O-acetyltransferase OS=Mus musculus GN=Crat PE=1 SV=3	70.833	mitochondria			transferase activity, transferring acyl groups; catalytic activity; transferase activity;	K00624	E2.3.1.7; carnitine O-acetyltransferase [EC:2.3.1.7]	ssc04146 Peroxisome - Sus scrofa (pig);
F1RR64	Uncharacterized protein	2.31266	Up	0.0157	ENDOG	"Endonuclease G, mitochondrial OS=Homo sapiens GN=ENDOG PE=1 SV=4"	"Endonuclease G, mitochondrial OS=Mus musculus GN=Endog PE=2 SV=1"	32.665	extracellular			organic cyclic compound binding; heterocyclic compound binding; catalytic activity; binding; nucleic acid binding; ion binding; cation binding; metal ion binding; hydrolase activity;	K01173	ENDOG; endonuclease G, mitochondrial	ssc04210 Apoptosis - Sus scrofa (pig);	IPR020821; IPR001604;	Extracellular Endonuclease, subunit A; DNA/RNA non-specific endonuclease;
F1RR65	Uncharacterized protein	0.638427	Down	0.00647	TBC1D13	TBC1 domain family member 13 OS=Homo sapiens GN=TBC1D13 PE=1 SV=3	TBC1 domain family member 13 OS=Mus musculus GN=Tbc1d13 PE=2 SV=1	46.285	cytoplasm							IPR000195;	Rab-GTPase-TBC domain;
F1RR69	Uncharacterized protein	3.75016	Up	2.49e-05	SETSIP	Protein SETSIP OS=Homo sapiens GN=SETSIP PE=1 SV=1	Protein SET OS=Mus musculus GN=Set PE=1 SV=1	33.615	nucleus	cellular component biogenesis; cellular component organization; nucleosome organization; cellular macromolecular complex assembly; chromatin assembly or disassembly; macromolecular complex subunit organization; protein-DNA complex assembly; DNA packaging; nucleosome assembly; chromosome organization; cellular component assembly; organelle organization; macromolecular complex assembly; chromatin o…	organelle; intracellular membrane-bounded organelle; intracellular organelle; nucleus; cell part; intracellular; intracellular part; membrane-bounded organelle; cell;		K11290
F1RR73	Uncharacterized protein	0.567847	Down	0.001	NUDCD2	NudC domain-containing protein 2 OS=Homo sapiens GN=NUDCD2 PE=1 SV=1	NudC domain-containing protein 2 OS=Mus musculus GN=Nudcd2 PE=1 SV=1	17.646	cytoplasm							IPR007052; IPR008978;	CS domain; HSP20-like chaperone;
F1RR78	Uncharacterized protein	1.5785	Up	0.00121	SPTAN1	"Spectrin alpha chain, non-erythrocytic 1 OS=Homo sapiens GN=SPTAN1 PE=1 SV=3"	"Spectrin alpha chain, non-erythrocytic 1 OS=Mus musculus GN=Sptan1 PE=2 SV=1"	282.1	nucleus			cation binding; metal ion binding; protein binding; calcium ion binding; binding; ion binding;	K06114	SPTA; spectrin alpha	ssc04210 Apoptosis - Sus scrofa (pig);	IPR014837; IPR013315; IPR001452; IPR002048; IPR011992;	EF-hand, Ca insensitive; Spectrin alpha chain, SH3 domain; SH3 domain; EF-hand domain; EF-hand domain pair;
F1RR89	Uncharacterized protein	0.561127	Down	0.000183	---	"Arginine--tRNA ligase, cytoplasmic OS=Homo sapiens GN=RARS PE=1 SV=2"	"Arginine--tRNA ligase, cytoplasmic OS=Mus musculus GN=Rars PE=2 SV=2"	35.194	cytoplasm	peptide metabolic process; cellular aromatic compound metabolic process; cellular protein metabolic process; single-organism process; biosynthetic process; organonitrogen compound biosynthetic process; tRNA aminoacylation; cellular metabolic process; organic substance metabolic process; metabolic process; cellular amino acid metabolic process; heterocycle metabolic process; nucleobase-containing …		ligase activity, forming aminoacyl-tRNA and related compounds; ATP binding; nucleoside phosphate binding; ligase activity, forming carbon-oxygen bonds; nucleoside binding; ion binding; ligase activity; nucleotide binding; organic cyclic compound binding; heterocyclic compound binding; ribonucleoside binding; carbohydrate derivative binding; ribonucleotide binding; catalytic activity; binding; pur…	K01887	RARS; arginyl-tRNA synthetase [EC:6.1.1.19]	ssc00970 Aminoacyl-tRNA biosynthesis - Sus scrofa (pig);	IPR014729; IPR008909; IPR009080;	Rossmann-like alpha/beta/alpha sandwich fold; DALR anticodon binding; Aminoacyl-tRNA synthetase, class Ia, anticodon-binding;
F1RRA7	Uncharacterized protein	0.618187	Down	0.0123	HSPA4L	Heat shock 70 kDa protein 4L OS=Homo sapiens GN=HSPA4L PE=1 SV=3	Heat shock 70 kDa protein 4L OS=Mus musculus GN=Hspa4l PE=1 SV=2	97.843	cyto_nucl				K09485	HSP110; heat shock protein 110kDa	ssc04141 Protein processing in endoplasmic reticulum - Sus scrofa (pig);	IPR029048; IPR029047;	Heat shock protein 70kD, C-terminal domain; Heat shock protein 70kD, peptide-binding domain;
F1RRB7	Uncharacterized protein	3.07102	Up	0.00412	ACAA1	"3-ketoacyl-CoA thiolase, peroxisomal OS=Homo sapiens GN=ACAA1 PE=1 SV=2"	"3-ketoacyl-CoA thiolase A, peroxisomal OS=Mus musculus GN=Acaa1a PE=1 SV=1"	44.501	cytoplasm	metabolic process;		transferase activity, transferring acyl groups; transferase activity, transferring acyl groups other than amino-acyl groups; transferase activity; catalytic activity;	K07513	ACAA1; acetyl-CoA acyltransferase 1 [EC:2.3.1.16]	ssc04146 Peroxisome - Sus scrofa (pig); ssc03320 PPAR signaling pathway - Sus scrofa (pig); ssc00280 Valine, leucine and isoleucine degradation - Sus scrofa (pig); ssc00592 alpha-Linolenic acid metabolism - Sus scrofa (pig); ssc00071 Fatty acid degradation - Sus scrofa (pig); ssc01212 Fatty acid metabolism - Sus scrofa (pig); ssc01040 Biosynthesis of unsaturated fatty acids - Sus scrofa (pig); ss…	IPR016039; IPR020616; IPR020617;	Thiolase-like; Thiolase, N-terminal; Thiolase, C-terminal;
F1RRH2	Anion exchange protein	0.505319	Down	0.0309	SLC4A7			136	plasma membrane	anion transport; transport; localization; ion transport; establishment of localization;	intrinsic component of membrane; membrane; integral component of membrane; membrane part;	active transmembrane transporter activity; secondary active transmembrane transporter activity; inorganic anion exchanger activity; ion transmembrane transporter activity; substrate-specific transporter activity; inorganic anion transmembrane transporter activity; anion transmembrane transporter activity; substrate-specific transmembrane transporter activity; transporter activity; transmembrane t…	K13858			IPR011531; IPR013769; IPR016152;	Bicarbonate transporter, C-terminal; Band 3 cytoplasmic domain; Phosphotransferase/anion transporter;
F1RRK0	Uncharacterized protein	0.573734	Down	4.3e-05	SCYL1	N-terminal kinase-like protein OS=Homo sapiens GN=SCYL1 PE=1 SV=1	N-terminal kinase-like protein OS=Mus musculus GN=Scyl1 PE=1 SV=1	89.077	nucleus	phosphorylation; cellular protein metabolic process; primary metabolic process; cellular metabolic process; phosphate-containing compound metabolic process; organic substance metabolic process; metabolic process; protein phosphorylation; phosphorus metabolic process; cellular macromolecule metabolic process; cellular protein modification process; protein metabolic process; macromolecule metabolic…		ATP binding; nucleoside phosphate binding; phosphotransferase activity, alcohol group as acceptor; nucleoside binding; ion binding; protein kinase activity; nucleotide binding; organic cyclic compound binding; heterocyclic compound binding; ribonucleoside binding; carbohydrate derivative binding; kinase activity; catalytic activity; ribonucleotide binding; binding; purine ribonucleoside binding; …	K08876			IPR000719; IPR011989; IPR016024; IPR011009;	Protein kinase domain; Armadillo-like helical; Armadillo-type fold; Protein kinase-like domain;
F1RRK9	Uncharacterized protein	0.489686	Down	0.00297	XPO5	Exportin-5 OS=Homo sapiens GN=XPO5 PE=1 SV=1	Exportin-5 OS=Mus musculus GN=Xpo5 PE=2 SV=1	136.39	cytoplasm	establishment of protein localization; transport; intracellular transport; cellular macromolecule localization; establishment of localization in cell; intracellular protein transport; organic substance transport; protein localization; macromolecule localization; cellular protein localization; localization; protein transport; establishment of localization; cellular localization;		small GTPase binding; Ras GTPase binding; binding; protein binding; Ran GTPase binding; GTPase binding; enzyme binding;	K14289	XPO5; exportin-5	ssc03013 RNA transport - Sus scrofa (pig);	IPR001494; IPR011989; IPR013598; IPR016024;	Importin-beta, N-terminal domain; Armadillo-like helical; Exportin-1/Importin-beta-like; Armadillo-type fold;
F1RRU7	Uncharacterized protein (Fragment)	0.510594	Down	9.58e-05	MRC2	C-type mannose receptor 2 OS=Homo sapiens GN=MRC2 PE=1 SV=2	C-type mannose receptor 2 OS=Mus musculus GN=Mrc2 PE=1 SV=3	161.78	endoplasmic reticulum				K06560	MRC; mannose receptor, C type	ssc05152 Tuberculosis - Sus scrofa (pig); ssc04145 Phagosome - Sus scrofa (pig);	IPR001304; IPR016187; IPR033989; IPR013806; IPR000772; IPR000562; IPR016186;	C-type lectin-like; C-type lectin fold; CD209-like, C-type lectin-like domain; Kringle-like fold; Ricin B, lectin domain; Fibronectin, type II, collagen-binding; C-type lectin-like/link domain;
F1RRV6	Uncharacterized protein	0.535257	Down	0.00832	NDRG1	Protein NDRG1 OS=Homo sapiens GN=NDRG1 PE=1 SV=1	Protein NDRG1 OS=Mus musculus GN=Ndrg1 PE=1 SV=1	37.495	cyto_nucl				K18266			IPR029058;	Alpha/Beta hydrolase fold;
F1RS11	Uncharacterized protein	0.640919	Down	0.00527	STXBP1	Syntaxin-binding protein 1 OS=Homo sapiens GN=STXBP1 PE=1 SV=1	Syntaxin-binding protein 1 OS=Mus musculus GN=Stxbp1 PE=1 SV=2	68.748	cytoplasm	vesicle docking involved in exocytosis; vesicle-mediated transport; single-organism cellular process; single-organism process; vesicle docking; membrane docking; establishment of localization; transport; single-organism localization; secretion by cell; localization; cellular process; exocytosis; single-organism transport; secretion;			K15292	STXBP1; syntaxin-binding protein 1	ssc04721 Synaptic vesicle cycle - Sus scrofa (pig);	IPR027482;	Sec1-like, domain 2;
F1RS15	Uncharacterized protein	0.542569	Down	4.7e-05	FAM129B	Niban-like protein 1 OS=Homo sapiens GN=FAM129B PE=1 SV=3	Niban-like protein 1 OS=Mus musculus GN=Fam129b PE=2 SV=2	83.279	nucleus							IPR011993; IPR001849;	PH domain-like; Pleckstrin homology domain;
F1RS44	Uncharacterized protein	0.5689	Down	0.000224	NGLY1	Peptide-N(4)-(N-acetyl-beta-glucosaminyl)asparagine amidase OS=Homo sapiens GN=NGLY1 PE=1 SV=1	Peptide-N(4)-(N-acetyl-beta-glucosaminyl)asparagine amidase OS=Mus musculus GN=Ngly1 PE=1 SV=2	74.776	mitochondria	cellular macromolecule catabolic process; glycoprotein catabolic process; carbohydrate derivative catabolic process; glycoprotein metabolic process; primary metabolic process; cellular metabolic process; organic substance metabolic process; organic substance catabolic process; metabolic process; protein catabolic process; macromolecule catabolic process; cellular macromolecule metabolic process; …	intracellular part; cell; cell part; intracellular; cytoplasm;		K01456	E3.5.1.52; peptide-N4-(N-acetyl-beta-glucosaminyl)asparagine amidase [EC:3.5.1.52]	ssc04141 Protein processing in endoplasmic reticulum - Sus scrofa (pig);	IPR002931; IPR018997; IPR006588; IPR008979;	Transglutaminase-like; PUB domain; Peptide N glycanase, PAW domain; Galactose-binding domain-like;
F1RS88	Uncharacterized protein	0.583815	Down	0.0104	DCLK2	Serine/threonine-protein kinase DCLK2 OS=Homo sapiens GN=DCLK2 PE=2 SV=4	Serine/threonine-protein kinase DCLK2 OS=Mus musculus GN=Dclk2 PE=1 SV=1	37.656	nucleus	regulation of cellular process; single organism signaling; cellular response to stimulus; signal transduction; regulation of biological process; cell communication; intracellular signal transduction; single-organism process; signaling; response to stimulus; cellular process; biological regulation;			K08805			IPR003533;	Doublecortin domain;
F1RS89	Uncharacterized protein	0.631639	Down	0.00151	---	Lipopolysaccharide-responsive and beige-like anchor protein OS=Homo sapiens GN=LRBA PE=1 SV=4	Lipopolysaccharide-responsive and beige-like anchor protein OS=Mus musculus GN=Lrba PE=2 SV=1	102.8	cytoplasm							IPR000409; IPR011993; IPR023362; IPR010508;	BEACH domain; PH domain-like; PH-BEACH domain; Domain of unknown function DUF1088;
F1RSB0	Uncharacterized protein	0.609083	Down	0.00793	ARFIP1	Arfaptin-1 OS=Homo sapiens GN=ARFIP1 PE=1 SV=2	MCG18094 (Fragment) OS=Mus musculus GN=Arfip1 PE=4 SV=1	38.391	cytoplasm			protein domain specific binding; protein binding; binding;	K20314			IPR010504; IPR027267;	Arfaptin homology (AH) domain; Arfaptin homology (AH) domain/BAR domain;
F1RSM2	Uncharacterized protein	0.569132	Down	0.00021	PSMD12	26S proteasome non-ATPase regulatory subunit 12 OS=Homo sapiens GN=PSMD12 PE=1 SV=3	26S proteasome non-ATPase regulatory subunit 12 OS=Mus musculus GN=Psmd12 PE=1 SV=4	53.024	cytoplasm			protein binding; binding;	K03035	PSMD12; 26S proteasome regulatory subunit N5	ssc05169 Epstein-Barr virus infection - Sus scrofa (pig); ssc03050 Proteasome - Sus scrofa (pig);	IPR000717; IPR011991;	Proteasome component (PCI) domain; Winged helix-turn-helix DNA-binding domain;
F1RSS9	Uncharacterized protein	0.636097	Down	0.000671	B3GLCT	"Beta-1,3-glucosyltransferase OS=Homo sapiens GN=B3GALTL PE=1 SV=2"	"Beta-1,3-glucosyltransferase OS=Mus musculus GN=B3galtl PE=2 SV=3"	52.454	cytoplasm		membrane;	transferase activity, transferring glycosyl groups; catalytic activity; transferase activity;	K13675	B3GALTL; UDP-glucose:O-linked fucose beta-1,3-glucosyltransferase [EC:2.4.1.-]	ssc00514 Other types of O-glycan biosynthesis - Sus scrofa (pig);	IPR029044;	Nucleotide-diphospho-sugar transferases;
F1RSZ5	Caspase-3	0.510063	Down	0.0226	CASP3			26.932	extracellular	proteolysis; metabolic process; macromolecule metabolic process; protein metabolic process; primary metabolic process; organic substance metabolic process;		endopeptidase activity; peptidase activity, acting on L-amino acid peptides; cysteine-type peptidase activity; hydrolase activity; peptidase activity; cysteine-type endopeptidase activity; catalytic activity;				IPR001309; IPR015917; IPR029030; IPR002138;	Peptidase C14, p20 domain; Peptidase C14A, caspase catalytic domain; Caspase-like domain; Peptidase C14, caspase non-catalytic subunit p10;
F1RT12	Uncharacterized protein	0.578241	Down	0.00039	TRAPPC11	Trafficking protein particle complex subunit 11 OS=Homo sapiens GN=TRAPPC11 PE=1 SV=2	Trafficking protein particle complex subunit 11 OS=Mus musculus GN=Trappc11 PE=2 SV=1	128.76	cytoplasm				K20308			IPR021773; IPR025876;	Foie gras liver health family 1; Trafficking protein particle complex subunit 11, C-terminal;
F1RT25	Uncharacterized protein	0.595662	Down	5.87e-05	SNX3	Sorting nexin-3 OS=Homo sapiens GN=SNX3 PE=1 SV=3	Sorting nexin-3 OS=Mus musculus GN=Snx3 PE=2 SV=1	13.565	cytoplasm			lipid binding; anion binding; binding; phosphatidylinositol binding; phospholipid binding; ion binding;	K17918	SNX3_12; sorting nexin-3/12	ssc04144 Endocytosis - Sus scrofa (pig);	IPR001683;	Phox homologous domain;
F1RT69	Uncharacterized protein	0.331929	Down	0.000243	FAM110B	Protein FAM110B OS=Homo sapiens GN=FAM110B PE=1 SV=1	Protein FAM110B OS=Mus musculus GN=Fam110b PE=2 SV=1	39.813	nucleus							IPR025741; IPR025739;	Centrosome-associated, FAM110, C-terminal domain; Centrosome-associated, FAM110, N-terminal domain;
F1RT83	Uncharacterized protein	0.617181	Down	0.00152	SDCBP	Syntenin-1 OS=Homo sapiens GN=SDCBP PE=1 SV=1	"MCG4375, isoform CRA_b OS=Mus musculus GN=Sdcbp PE=2 SV=1"	32.25	cyto_nucl			protein binding; binding;	K17254			IPR001478;	PDZ domain;
F1RTB6	Uncharacterized protein	1.80544	Up	0.00613	LUC7L3	Luc7-like protein 3 OS=Homo sapiens GN=LUC7L3 PE=1 SV=2	Luc7-like protein 3 OS=Mus musculus GN=Luc7l3 PE=1 SV=1	51.468	nucleus	cellular component biogenesis; mRNA splice site selection; cellular component organization; ribonucleoprotein complex biogenesis; ribonucleoprotein complex assembly; cellular aromatic compound metabolic process; cellular metabolic process; organic substance metabolic process; mRNA splicing, via spliceosome; metabolic process; RNA splicing, via transesterification reactions with bulged adenosine a…	U1 snRNP; intracellular organelle; intracellular organelle part; macromolecular complex; intracellular part; cell; organelle part; spliceosomal snRNP complex; intracellular membrane-bounded organelle; organelle; nucleus; cell part; intracellular; ribonucleoprotein complex; intracellular ribonucleoprotein complex; small nuclear ribonucleoprotein complex; membrane-bounded organelle; nuclear part;	organic cyclic compound binding; heterocyclic compound binding; mRNA binding; RNA binding; binding; nucleic acid binding;
F1RTE1	Uncharacterized protein (Fragment)	1.70615	Up	0.00185	GPC4	Glypican-4 OS=Homo sapiens GN=GPC4 PE=1 SV=4	Glypican-4 OS=Mus musculus GN=Gpc4 PE=2 SV=2	56.697	nucleus		extracellular matrix; membrane; extracellular region part; extracellular region; proteinaceous extracellular matrix;	carbohydrate derivative binding; binding; ion binding; proteoglycan binding; heparan sulfate proteoglycan binding; anion binding; protein binding; glycoprotein binding; sulfur compound binding;	K08110	GPC4; glypican 4	ssc04310 Wnt signaling pathway - Sus scrofa (pig);
F1RTF0	Uncharacterized protein	3.38156	Up	0.0105	PRRC2A	Protein PRRC2A OS=Homo sapiens GN=PRRC2A PE=1 SV=3	Protein PRRC2A OS=Mus musculus GN=Prrc2a PE=1 SV=1	229.07	nucleus							IPR009738;	BAT2, N-terminal;
F1RTQ8	Uncharacterized protein	0.564906	Down	0.000147	CARMIL1	Leucine-rich repeat-containing protein 16A OS=Homo sapiens GN=LRRC16A PE=1 SV=1	Leucine-rich repeat-containing protein 16A OS=Mus musculus GN=Lrrc16a PE=1 SV=2	146.72	nucleus			protein binding; binding;	K20493			IPR031943; IPR032675;	CARMIL, C-terminal domain; Leucine-rich repeat domain, L domain-like;
F1RU17	Sorting nexin	0.460078	Down	0.00182	SNX32			46.135	cyto_nucl			lipid binding; anion binding; binding; phosphatidylinositol binding; phospholipid binding; ion binding;	K17920	SNX5_6_32; sorting nexin-5/6/32	ssc04144 Endocytosis - Sus scrofa (pig);	IPR015404; IPR001683;	Sorting nexin Vps5-like, C-terminal; Phox homologous domain;
F1RU22	Uncharacterized protein	0.6261	Down	0.0103	EFEMP2	EGF-containing fibulin-like extracellular matrix protein 2 OS=Homo sapiens GN=EFEMP2 PE=1 SV=3	EGF-containing fibulin-like extracellular matrix protein 2 OS=Mus musculus GN=Efemp2 PE=2 SV=1	49.4	extracellular			cation binding; metal ion binding; protein binding; calcium ion binding; binding; ion binding;	K19866			IPR026823; IPR001881; IPR000742; IPR009030;	Complement Clr-like EGF domain; EGF-like calcium-binding domain; EGF-like domain; Growth factor receptor cysteine-rich domain;
F1RU27	Uncharacterized protein	0.646986	Down	0.000454	C11orf68	UPF0696 protein C11orf68 OS=Homo sapiens GN=C11orf68 PE=1 SV=2	UPF0696 protein C11orf68 homolog OS=Mus musculus GN=Bles03 PE=2 SV=1	27.362	extracellular
F1RU28	Uncharacterized protein	3.39301	Up	2.61e-06	DRAP1	Dr1-associated corepressor OS=Homo sapiens GN=DRAP1 PE=1 SV=3	Dr1-associated corepressor OS=Mus musculus GN=Drap1 PE=2 SV=2	22.314	plasma membrane			protein binding; protein heterodimerization activity; binding; protein dimerization activity;				IPR003958; IPR009072;	Transcription factor CBF/NF-Y/archaeal histone domain; Histone-fold;
F1RU54	Uncharacterized protein	1.9048	Up	0.00232	MRPL11	"39S ribosomal protein L11, mitochondrial OS=Homo sapiens GN=MRPL11 PE=1 SV=1"	"39S ribosomal protein L11, mitochondrial OS=Mus musculus GN=Mrpl11 PE=2 SV=1"	20.774	mitochondria	peptide metabolic process; peptide biosynthetic process; cellular protein metabolic process; nitrogen compound metabolic process; biosynthetic process; cellular amide metabolic process; primary metabolic process; organonitrogen compound biosynthetic process; organic substance biosynthetic process; cellular metabolic process; cellular biosynthetic process; organic substance metabolic process; meta…	ribosome; organelle; intracellular organelle; intracellular non-membrane-bounded organelle; cell part; intracellular; cytoplasm; macromolecular complex; intracellular part; ribonucleoprotein complex; cell; intracellular ribonucleoprotein complex; cytoplasmic part; non-membrane-bounded organelle;	structural constituent of ribosome; structural molecule activity;	K02867	RP-L11; large subunit ribosomal protein L11	ssc03010 Ribosome - Sus scrofa (pig);	IPR020783; IPR020784;	Ribosomal protein L11, C-terminal; Ribosomal protein L11, N-terminal;
F1RUD6	Uncharacterized protein	1.73948	Up	0.00613	FAM65B	Protein FAM65B OS=Homo sapiens GN=FAM65B PE=1 SV=4	Protein FAM65B OS=Mus musculus GN=Fam65b PE=2 SV=2	119.61	cytoplasm			binding;				IPR011989; IPR016024; IPR031780;	Armadillo-like helical; Armadillo-type fold; FAM65, N-terminal;
F1RUE1	Uncharacterized protein	0.66131	Down	0.00153	TDP2	Tyrosyl-DNA phosphodiesterase 2 OS=Homo sapiens GN=TDP2 PE=1 SV=1	Tyrosyl-DNA phosphodiesterase 2 OS=Mus musculus GN=Tdp2 PE=1 SV=1	40.919	nucleus			protein binding; binding;	K19619			IPR005135; IPR009060;	Endonuclease/exonuclease/phosphatase; UBA-like;
F1RUF9	Uncharacterized protein	0.510306	Down	0.000208	SOX4	Transcription factor SOX-4 OS=Homo sapiens GN=SOX4 PE=1 SV=1	Transcription factor SOX-4 OS=Mus musculus GN=Sox4 PE=1 SV=2	47.523	nucleus				K09268			IPR009071;	High mobility group box domain;
F1RUK9	Uncharacterized protein	2.02398	Up	0.0337	FAM208B	Protein FAM208B OS=Homo sapiens GN=FAM208B PE=1 SV=1	Protein FAM208B OS=Mus musculus GN=Fam208b PE=2 SV=2	248.75	nucleus							IPR022168; IPR022188;	Domain of unknown function DUF3699; Protein of unknown function DUF3715;
F1RUN2	Serum albumin	0.515966	Down	0.00218	ALB			69.669	extracellular	transport; localization; establishment of localization;	extracellular space; extracellular region part; extracellular region;		K16141	ALB; serum albumin	ssc04918 Thyroid hormone synthesis - Sus scrofa (pig);	IPR020858; IPR014760;	Serum albumin-like; Serum albumin, N-terminal;
F1RUS8	Uncharacterized protein	0.554802	Down	0.00162	TBCC	Tubulin-specific chaperone C OS=Homo sapiens GN=TBCC PE=1 SV=2	Tubulin-specific chaperone C OS=Mus musculus GN=Tbcc PE=2 SV=1	38.654	nucleus	cell morphogenesis; developmental process; anatomical structure morphogenesis; cellular component organization; single-organism developmental process; cellular developmental process; single-organism cellular process; cellular component morphogenesis; single-organism process; cellular process; anatomical structure development; cellular component organization or biogenesis;		tubulin binding; protein binding; cytoskeletal protein binding; binding;				IPR006599; IPR016098; IPR031925; IPR017901; IPR012945;	CARP motif; Cyclase-associated protein CAP/septum formation inhibitor MinC, C-terminal; Tubulin-specific chaperone C, N-terminal; C-CAP/cofactor C-like domain; Tubulin binding cofactor C-like domain;
F1RV23	cAMP-dependent protein kinase type I-alpha regulatory subunit	0.447381	Down	0.0109	PRKAR1A			42.92	nucleus	regulation of cellular process; regulation of phosphorylation; regulation of phosphorus metabolic process; regulation of biological process; regulation of cellular protein metabolic process; regulation of primary metabolic process; regulation of macromolecule metabolic process; regulation of protein metabolic process; regulation of protein modification process; regulation of protein phosphorylati…	macromolecular complex; intracellular part; cell; cell part; intracellular; cAMP-dependent protein kinase complex;	cAMP-dependent protein kinase regulator activity; kinase regulator activity; protein kinase regulator activity; molecular function regulator; enzyme regulator activity;	K04739	PRKAR; cAMP-dependent protein kinase regulator	ssc04910 Insulin signaling pathway - Sus scrofa (pig);	IPR000595; IPR018490; IPR003117; IPR014710;	Cyclic nucleotide-binding domain; Cyclic nucleotide-binding-like; cAMP-dependent protein kinase regulatory subunit, dimerization-anchoring domain; RmlC-like jelly roll fold;
F1RV28	Uncharacterized protein	0.561332	Down	0.000797	MAP2K6	Dual specificity mitogen-activated protein kinase kinase 6 OS=Homo sapiens GN=MAP2K6 PE=1 SV=1	Dual specificity mitogen-activated protein kinase kinase 6 OS=Mus musculus GN=Map2k6 PE=1 SV=1	37.536	cyto_nucl	phosphorylation; cellular protein metabolic process; primary metabolic process; cellular metabolic process; phosphate-containing compound metabolic process; organic substance metabolic process; metabolic process; protein phosphorylation; phosphorus metabolic process; cellular macromolecule metabolic process; cellular protein modification process; protein metabolic process; macromolecule metabolic…		ATP binding; nucleoside phosphate binding; phosphotransferase activity, alcohol group as acceptor; nucleoside binding; ion binding; protein kinase activity; nucleotide binding; organic cyclic compound binding; heterocyclic compound binding; ribonucleoside binding; carbohydrate derivative binding; kinase activity; catalytic activity; ribonucleotide binding; binding; purine ribonucleoside binding; …	K04433	MAP2K6; mitogen-activated protein kinase kinase 6 [EC:2.7.12.2]	ssc05145 Toxoplasmosis - Sus scrofa (pig); ssc04668 TNF signaling pathway - Sus scrofa (pig); ssc05418 Fluid shear stress and atherosclerosis - Sus scrofa (pig); ssc05014 Amyotrophic lateral sclerosis (ALS) - Sus scrofa (pig); ssc04010 MAPK signaling pathway - Sus scrofa (pig); ssc04912 GnRH signaling pathway - Sus scrofa (pig); ssc04750 Inflammatory mediator regulation of TRP channels - Sus scro…	IPR000719; IPR011009;	Protein kinase domain; Protein kinase-like domain;
F1RV35	Uncharacterized protein	1.78963	Up	0.00519	CDC42EP4	Cdc42 effector protein 4 OS=Homo sapiens GN=CDC42EP4 PE=1 SV=1	Cdc42 effector protein 4 OS=Mus musculus GN=Cdc42ep4 PE=1 SV=1	38.003	mitochondria							IPR000095;	CRIB domain;
F1RVA6	Uncharacterized protein	0.623134	Down	0.00474	XPO4	Exportin-4 OS=Homo sapiens GN=XPO4 PE=1 SV=2	Exportin-4 OS=Mus musculus GN=Xpo4 PE=2 SV=2	112.73	extracellular			binding;				IPR014877; IPR011989; IPR016024;	CRM1 C-terminal domain; Armadillo-like helical; Armadillo-type fold;
F1RVB1	Lambda-crystallin homolog	0.623061	Down	0.00935	CRYL1			29.753	cytoplasm	oxidation-reduction process; small molecule metabolic process; single-organism cellular process; single-organism process; cellular lipid metabolic process; fatty acid metabolic process; primary metabolic process; cellular metabolic process; organic substance metabolic process; metabolic process; single-organism metabolic process; carboxylic acid metabolic process; monocarboxylic acid metabolic pr…		nucleoside phosphate binding; ion binding; NAD+ binding; nucleotide binding; cofactor binding; oxidoreductase activity; heterocyclic compound binding; organic cyclic compound binding; oxidoreductase activity, acting on CH-OH group of donors; oxidoreductase activity, acting on the CH-OH group of donors, NAD or NADP as acceptor; NAD binding; catalytic activity; binding; anion binding; 3-hydroxyacyl…				IPR013328; IPR008927; IPR016040; IPR006176; IPR006108;	6-phosphogluconate dehydrogenase, domain 2; 6-phosphogluconate dehydrogenase C-terminal domain-like; NAD(P)-binding domain; 3-hydroxyacyl-CoA dehydrogenase, NAD binding; 3-hydroxyacyl-CoA dehydrogenase, C-terminal;
F1RVC2	Uncharacterized protein	0.545294	Down	0.00132	ANTXR2	Anthrax toxin receptor 2 OS=Homo sapiens GN=ANTXR2 PE=1 SV=5	Anthrax toxin receptor 2 OS=Mus musculus GN=Antxr2 PE=2 SV=1	53.413	extracellular		intrinsic component of membrane; membrane; integral component of membrane; membrane part;	molecular transducer activity; receptor activity;	K20909	ANTXR; anthrax toxin receptor	ssc04621 NOD-like receptor signaling pathway - Sus scrofa (pig);	IPR008400; IPR008399; IPR002035;	Anthrax toxin receptor, extracellular; Anthrax toxin receptor, C-terminal; von Willebrand factor, type A;
F1RVC4	Uncharacterized protein	3.25761	Up	4.3e-05	---	High mobility group protein B3 OS=Homo sapiens GN=HMGB3 PE=1 SV=4	High mobility group protein B3 OS=Mus musculus GN=Hmgb3 PE=2 SV=3	22.357	nucleus				K11296			IPR009071;	High mobility group box domain;
F1RVD4	Uncharacterized protein	0.505073	Down	0.00239	SEC31A	Protein transport protein Sec31A OS=Homo sapiens GN=SEC31A PE=1 SV=3	Protein transport protein Sec31A OS=Mus musculus GN=Sec31a PE=1 SV=2	132.33	nucleus			protein binding; binding;	K14005	SEC31; protein transport protein SEC31	ssc04141 Protein processing in endoplasmic reticulum - Sus scrofa (pig);	IPR017986; IPR015943; IPR024298;	WD40-repeat-containing domain; WD40/YVTN repeat-like-containing domain; Ancestral coatomer element 1, Sec16/Sec31;
F1RVE8	Uncharacterized protein	0.484342	Down	0.000438	UBA6	Ubiquitin-like modifier-activating enzyme 6 OS=Homo sapiens GN=UBA6 PE=1 SV=1	Ubiquitin-like modifier-activating enzyme 6 OS=Mus musculus GN=Uba6 PE=1 SV=1	118.14	nucleus	metabolic process; cellular macromolecule metabolic process; cellular protein metabolic process; cellular protein modification process; macromolecule metabolic process; protein metabolic process; primary metabolic process; macromolecule modification; protein modification process; cellular metabolic process; cellular process; organic substance metabolic process;		small protein activating enzyme activity; ligase activity, forming carbon-sulfur bonds; catalytic activity; ligase activity;	K10699	UBE1L2; ubiquitin-activating enzyme E1-like protein 2 [EC:6.2.1.45]	ssc04120 Ubiquitin mediated proteolysis - Sus scrofa (pig);	IPR032418; IPR019572; IPR000594; IPR016040; IPR032420; IPR018965;	Ubiquitin-activating enzyme E1, FCCH domain; Ubiquitin-activating enzyme, catalytic cysteine domain; THIF-type NAD/FAD binding fold; NAD(P)-binding domain; Ubiquitin-activating enzyme E1, four-helix bundle; Ubiquitin-activating enzyme E1, C-terminal;
F1RVH5	Peptidyl-prolyl cis-trans isomerase	2.0723	Up	0.00222	LOC100524880			22.743	extracellular	cellular protein metabolic process; primary metabolic process; peptidyl-proline modification; protein peptidyl-prolyl isomerization; cellular metabolic process; organic substance metabolic process; protein folding; peptidyl-amino acid modification; metabolic process; cellular macromolecule metabolic process; cellular protein modification process; protein metabolic process; macromolecule metabolic…		peptidyl-prolyl cis-trans isomerase activity; isomerase activity; catalytic activity; cis-trans isomerase activity;	K09563			IPR002130; IPR029000;	Cyclophilin-type peptidyl-prolyl cis-trans isomerase domain; Cyclophilin-like domain;
F1RVH7	Uncharacterized protein	2.58743	Up	0.000299	IGFBP7	Insulin-like growth factor-binding protein 7 OS=Homo sapiens GN=IGFBP7 PE=1 SV=1	Insulin-like growth factor-binding protein 7 OS=Mus musculus GN=Igfbp7 PE=2 SV=1	29.003	extracellular	regulation of cell growth; regulation of cellular process; regulation of biological process; regulation of growth; regulation of cellular component organization; biological regulation;	extracellular region;	insulin-like growth factor binding; protein binding; growth factor binding; binding;				IPR003598; IPR007110; IPR002350; IPR013783; IPR003599; IPR000867; IPR013098; IPR009030;	Immunoglobulin subtype 2; Immunoglobulin-like domain; Kazal domain; Immunoglobulin-like fold; Immunoglobulin subtype; Insulin-like growth factor-binding protein, IGFBP; Immunoglobulin I-set; Growth factor receptor cysteine-rich domain;
F1RVI4	Phosphatidylinositol 5-phosphate 4-kinase type-2 alpha	0.51455	Down	0.000283	PIP4K2A			41.284	cytoskeleton	glycerolipid metabolic process; single-organism cellular process; single-organism process; cellular lipid metabolic process; primary metabolic process; cellular metabolic process; phosphate-containing compound metabolic process; organic substance metabolic process; metabolic process; phosphorus metabolic process; single-organism metabolic process; glycerophospholipid metabolic process; organophos…		phosphatidylinositol phosphate kinase activity; kinase activity; phosphotransferase activity, alcohol group as acceptor; catalytic activity; transferase activity; transferase activity, transferring phosphorus-containing groups;				IPR027483; IPR027484; IPR002498;	Phosphatidylinositol-4-phosphate 5-kinase, C-terminal; Phosphatidylinositol-4-phosphate 5-kinase, N-terminal domain; Phosphatidylinositol-4-phosphate 5-kinase, core;
F1RVK3	Acyl-CoA-binding domain-containing protein 5	1.55325	Up	0.00338	ACBD5			58.341	cytoplasm	cellular catabolic process; metabolic process; autophagy; pexophagy; cellular process; cellular metabolic process; catabolic process;		fatty-acyl-CoA binding; binding; ion binding; anion binding; cofactor binding; sulfur compound binding; coenzyme binding;				IPR000582; IPR014352;	Acyl-CoA-binding protein, ACBP; FERM/acyl-CoA-binding protein, 3-helical bundle;
F1RVM0	Uncharacterized protein	0.627533	Down	0.00148	LOC100518497	O-acetyl-ADP-ribose deacetylase 1 OS=Homo sapiens GN=OARD1 PE=1 SV=2	O-acetyl-ADP-ribose deacetylase 1 OS=Mus musculus GN=Oard1 PE=2 SV=2	16.978	extracellular							IPR002589;	Macro domain;
F1RVM6	Uncharacterized protein	0.497074	Down	0.0334	---	Glutathione S-transferase P OS=Homo sapiens GN=GSTP1 PE=1 SV=2	Glutathione S-transferase P 1 OS=Mus musculus GN=Gstp1 PE=1 SV=2	23.631	cytoplasm	metabolic process;		glutathione transferase activity; transferase activity, transferring alkyl or aryl (other than methyl) groups; protein binding; catalytic activity; transferase activity; binding;	K00799	GST; glutathione S-transferase [EC:2.5.1.18]	ssc00982 Drug metabolism - cytochrome P450 - Sus scrofa (pig); ssc01524 Platinum drug resistance - Sus scrofa (pig); ssc05418 Fluid shear stress and atherosclerosis - Sus scrofa (pig); ssc00980 Metabolism of xenobiotics by cytochrome P450 - Sus scrofa (pig); ssc00480 Glutathione metabolism - Sus scrofa (pig); ssc05204 Chemical carcinogenesis - Sus scrofa (pig);	IPR010987; IPR004046; IPR004045; IPR012336;	Glutathione S-transferase, C-terminal-like; Glutathione S-transferase, C-terminal; Glutathione S-transferase, N-terminal; Thioredoxin-like fold;
F1RVY7	Uncharacterized protein	0.471602	Down	0.00314	GALK1	Galactokinase OS=Homo sapiens GN=GALK1 PE=1 SV=1	Galactokinase OS=Mus musculus GN=Galk1 PE=2 SV=2	44.993	nucleus	phosphorylation; small molecule metabolic process; single-organism process; carbohydrate metabolic process; primary metabolic process; cellular metabolic process; phosphate-containing compound metabolic process; organic substance metabolic process; single-organism carbohydrate metabolic process; metabolic process; cellular carbohydrate metabolic process; phosphorus metabolic process; single-organ…	intracellular part; cell; cell part; intracellular; cytoplasm;	ATP binding; nucleoside phosphate binding; phosphotransferase activity, alcohol group as acceptor; nucleoside binding; ion binding; nucleotide binding; organic cyclic compound binding; heterocyclic compound binding; ribonucleoside binding; carbohydrate kinase activity; carbohydrate derivative binding; kinase activity; catalytic activity; ribonucleotide binding; binding; purine ribonucleoside bind…	K00849	galK; galactokinase [EC:2.7.1.6]	ssc00052 Galactose metabolism - Sus scrofa (pig); ssc00520 Amino sugar and nucleotide sugar metabolism - Sus scrofa (pig); ssc01100 Metabolic pathways - Sus scrofa (pig);	IPR019539; IPR020568; IPR006204; IPR014721; IPR013750;	Galactokinase galactose-binding domain; Ribosomal protein S5 domain 2-type fold; GHMP kinase N-terminal domain; Ribosomal protein S5 domain 2-type fold, subgroup; GHMP kinase, C-terminal domain;
F1RW14	Uncharacterized protein	0.566249	Down	0.0378	WDFY3	WD repeat and FYVE domain-containing protein 3 OS=Homo sapiens GN=WDFY3 PE=1 SV=2	WD repeat and FYVE domain-containing protein 3 OS=Mus musculus GN=Wdfy3 PE=2 SV=1	395.21	plasma membrane			metal ion binding; cation binding; protein binding; binding; ion binding;				IPR000409; IPR011989; IPR013320; IPR000306; IPR017455; IPR013083; IPR011993; IPR017986; IPR015943; IPR011011; IPR016024; IPR023362;	BEACH domain; Armadillo-like helical; Concanavalin A-like lectin/glucanase domain; FYVE zinc finger; Zinc finger, FYVE-related; Zinc finger, RING/FYVE/PHD-type; PH domain-like; WD40-repeat-containing domain; WD40/YVTN repeat-like-containing domain; Zinc finger, FYVE/PHD-type; Armadillo-type fold; PH-BEACH domain;
F1RW61	Uncharacterized protein	1.80499	Up	0.001	PIGY	"Protein preY, mitochondrial OS=Homo sapiens GN=PYURF PE=1 SV=1"	"Protein preY, mitochondrial OS=Mus musculus GN=Pyurf PE=3 SV=1"	12.595	mitochondria
F1RW68	Uncharacterized protein	1.75577	Up	0.0226	GPRIN3	G protein-regulated inducer of neurite outgrowth 3 OS=Homo sapiens GN=GPRIN3 PE=2 SV=2	G protein-regulated inducer of neurite outgrowth 3 OS=Mus musculus GN=Gprin3 PE=1 SV=1	81.669	nucleus							IPR032745;	G protein-regulated inducer of neurite outgrowth, C-terminal;
F1RWC6	Uncharacterized protein	0.537148	Down	0.019	ARHGAP12	Rho GTPase-activating protein 12 OS=Homo sapiens GN=ARHGAP12 PE=1 SV=1	Rho GTPase-activating protein 12 OS=Mus musculus GN=Arhgap12 PE=4 SV=1	96.358	nucleus	regulation of cellular process; single organism signaling; cellular response to stimulus; signal transduction; regulation of biological process; cell communication; single-organism process; signaling; response to stimulus; cellular process; biological regulation;		protein binding; binding;	K20636			IPR001452; IPR001202; IPR011993; IPR008936; IPR000198; IPR001849;	SH3 domain; WW domain; PH domain-like; Rho GTPase activation protein; Rho GTPase-activating protein domain; Pleckstrin homology domain;
F1RWH1	Uncharacterized protein	1.72091	Up	0.0111	CBX1	Chromobox protein homolog 1 OS=Homo sapiens GN=CBX1 PE=1 SV=1	Chromobox protein homolog 1 OS=Mus musculus GN=Cbx1 PE=1 SV=1	21.418	nucleus		organelle; intracellular membrane-bounded organelle; intracellular organelle; nucleus; cell part; intracellular; intracellular part; membrane-bounded organelle; cell;		K11585			IPR017984; IPR008251; IPR023780; IPR016197; IPR000953;	Chromo domain subgroup; Chromo shadow domain; Chromo domain; Chromo domain-like; Chromo/chromo shadow domain;
F1RWI5	Uncharacterized protein	0.530553	Down	0.00157	---	60S ribosomal protein L7 OS=Homo sapiens GN=RPL7 PE=1 SV=1	60S ribosomal protein L7 (Fragment) OS=Mus musculus GN=Rpl7 PE=3 SV=1	26.503	cytoplasm				K02937	RP-L7e; large subunit ribosomal protein L7e	ssc03010 Ribosome - Sus scrofa (pig);	IPR012988; IPR016082;	Ribosomal protein L30, N-terminal; Ribosomal protein L30, ferredoxin-like fold domain;
F1RWJ0	Uncharacterized protein	1.59587	Up	0.00236	MRPL10	"39S ribosomal protein L10, mitochondrial OS=Homo sapiens GN=MRPL10 PE=1 SV=3"	"39S ribosomal protein L10, mitochondrial OS=Mus musculus GN=Mrpl10 PE=2 SV=2"	29.409	mitochondria	cellular component biogenesis; ribosome biogenesis; ribonucleoprotein complex biogenesis; cellular component organization or biogenesis;	cell; intracellular; cell part;		K02864	RP-L10; large subunit ribosomal protein L10	ssc03010 Ribosome - Sus scrofa (pig);
F1RWS7	Uncharacterized protein	0.666417	Down	0.000297	CTDP1	RNA polymerase II subunit A C-terminal domain phosphatase OS=Homo sapiens GN=CTDP1 PE=1 SV=3	RNA polymerase II subunit A C-terminal domain phosphatase OS=Mus musculus GN=Ctdp1 PE=1 SV=1	70.518	nucleus				K15732			IPR015388; IPR023214; IPR001357;	FCP1-like phosphatase, C-terminal; HAD-like domain; BRCT domain;
F1RWW4	Uncharacterized protein	0.392114	Down	0.00139	PDLIM5	PDZ and LIM domain protein 5 OS=Homo sapiens GN=PDLIM5 PE=1 SV=5	PDZ and LIM domain protein 5 OS=Mus musculus GN=Pdlim5 PE=1 SV=4	58.335	nucleus			cation binding; metal ion binding; zinc ion binding; transition metal ion binding; binding; ion binding;				IPR001781; IPR031847;	Zinc finger, LIM-type; Domain of unknown function DUF4749;
F1RWX8	Uncharacterized protein	0.459058	Down	0.00429	UBA1	Ubiquitin-like modifier-activating enzyme 1 OS=Homo sapiens GN=UBA1 PE=1 SV=3	Ubiquitin-like modifier-activating enzyme 1 OS=Mus musculus GN=Uba1 PE=1 SV=1	117.76	nucleus	metabolic process; cellular macromolecule metabolic process; cellular protein metabolic process; cellular protein modification process; macromolecule metabolic process; protein metabolic process; primary metabolic process; macromolecule modification; protein modification process; cellular metabolic process; cellular process; organic substance metabolic process;		small protein activating enzyme activity; ligase activity, forming carbon-sulfur bonds; catalytic activity; ligase activity;	K03178	UBE1; ubiquitin-activating enzyme E1 [EC:6.2.1.45]	ssc04120 Ubiquitin mediated proteolysis - Sus scrofa (pig); ssc05012 Parkinson's disease - Sus scrofa (pig);	IPR032418; IPR019572; IPR000594; IPR016040; IPR032420; IPR018965;	Ubiquitin-activating enzyme E1, FCCH domain; Ubiquitin-activating enzyme, catalytic cysteine domain; THIF-type NAD/FAD binding fold; NAD(P)-binding domain; Ubiquitin-activating enzyme E1, four-helix bundle; Ubiquitin-activating enzyme E1, C-terminal;
F1RX00	Amine oxidase [flavin-containing]	0.57763	Down	0.00981	MAOA			59.802	cytoplasm	single-organism process; metabolic process; oxidation-reduction process; single-organism metabolic process;		catalytic activity; oxidoreductase activity;	K00274	MAO; monoamine oxidase [EC:1.4.3.4]	ssc04728 Dopaminergic synapse - Sus scrofa (pig); ssc00982 Drug metabolism - cytochrome P450 - Sus scrofa (pig); ssc04726 Serotonergic synapse - Sus scrofa (pig); ssc00330 Arginine and proline metabolism - Sus scrofa (pig); ssc05034 Alcoholism - Sus scrofa (pig); ssc05031 Amphetamine addiction - Sus scrofa (pig); ssc00350 Tyrosine metabolism - Sus scrofa (pig); ssc00260 Glycine, serine and threon…	IPR002937; IPR016040; IPR023753;	Amine oxidase; NAD(P)-binding domain; FAD/NAD(P)-binding domain;
F1RX12	Uncharacterized protein	0.489546	Down	0.00174	GMDS	"GDP-mannose 4,6 dehydratase OS=Homo sapiens GN=GMDS PE=1 SV=1"	"GDP-mannose 4,6 dehydratase OS=Mus musculus GN=Gmds PE=2 SV=1"	39.927	cytoplasm	metabolic process; GDP-mannose metabolic process; cellular aromatic compound metabolic process; heterocycle metabolic process; nucleobase-containing compound metabolic process; carbohydrate derivative metabolic process; organic cyclic compound metabolic process; nitrogen compound metabolic process; cellular nitrogen compound metabolic process; nucleotide-sugar metabolic process; primary metabolic…		lyase activity; hydro-lyase activity; GDP-mannose 4,6-dehydratase activity; catalytic activity; carbon-oxygen lyase activity;	K01711	gmd; GDPmannose 4,6-dehydratase [EC:4.2.1.47]	ssc00051 Fructose and mannose metabolism - Sus scrofa (pig); ssc00520 Amino sugar and nucleotide sugar metabolism - Sus scrofa (pig); ssc01100 Metabolic pathways - Sus scrofa (pig);	IPR016040;	NAD(P)-binding domain;
F1RX17	Uncharacterized protein (Fragment)	0.62718	Down	0.00647	USP9X	Probable ubiquitin carboxyl-terminal hydrolase FAF-X OS=Homo sapiens GN=USP9X PE=1 SV=3	Ubiquitin carboxyl-terminal hydrolase OS=Mus musculus GN=Usp9x PE=2 SV=1	205.13	plasma membrane	modification-dependent macromolecule catabolic process; protein modification by small protein removal; cellular macromolecule catabolic process; proteolysis involved in cellular protein catabolic process; cellular protein catabolic process; modification-dependent protein catabolic process; cellular protein metabolic process; ubiquitin-dependent protein catabolic process; protein modification by s…		peptidase activity; thiol-dependent ubiquitinyl hydrolase activity; catalytic activity; ubiquitinyl hydrolase activity; peptidase activity, acting on L-amino acid peptides; ubiquitin-like protein-specific protease activity; cysteine-type peptidase activity; hydrolase activity;	K11840			IPR001394; IPR028889;	Peptidase C19, ubiquitin carboxyl-terminal hydrolase; Ubiquitin specific protease domain;
F1RXA7	Uncharacterized protein	0.613865	Down	0.0057	PSMD3	26S proteasome non-ATPase regulatory subunit 3 OS=Homo sapiens GN=PSMD3 PE=1 SV=2	26S proteasome non-ATPase regulatory subunit 3 OS=Mus musculus GN=Psmd3 PE=1 SV=3	61.178	cyto_nucl	regulation of biological process; regulation of primary metabolic process; regulation of macromolecule metabolic process; regulation of protein metabolic process; regulation of catabolic process; regulation of metabolic process; regulation of protein catabolic process; biological regulation;	catalytic complex; proteasome complex; cell part; intracellular; macromolecular complex; intracellular part; peptidase complex; cell; protein complex; endopeptidase complex;	protein binding; enzyme regulator activity; molecular function regulator; binding;	K03033	PSMD3; 26S proteasome regulatory subunit N3	ssc05169 Epstein-Barr virus infection - Sus scrofa (pig); ssc03050 Proteasome - Sus scrofa (pig);	IPR000717; IPR011991; IPR013586;	Proteasome component (PCI) domain; Winged helix-turn-helix DNA-binding domain; 26S proteasome regulatory subunit, C-terminal;
F1RXC7	Uncharacterized protein	3.01009	Up	9.65e-05	CASC3	Protein CASC3 OS=Homo sapiens GN=CASC3 PE=1 SV=2	Protein CASC3 OS=Mus musculus GN=Casc3 PE=1 SV=3	66.68	nucleus				K14323	CASC3; protein CASC3	ssc03013 RNA transport - Sus scrofa (pig); ssc03015 mRNA surveillance pathway - Sus scrofa (pig);	IPR018545;	Btz domain;
F1RXD4	Uncharacterized protein	1.77838	Up	0.00541	RMDN1	Regulator of microtubule dynamics protein 1 OS=Homo sapiens GN=RMDN1 PE=1 SV=1	Regulator of microtubule dynamics protein 1 OS=Mus musculus GN=Rmdn1 PE=2 SV=2	36.074	mitochondria			protein binding; binding;				IPR011990;	Tetratricopeptide-like helical domain;
F1RXI6	Uncharacterized protein	0.636043	Down	5.52e-05	PSMD10	26S proteasome non-ATPase regulatory subunit 10 OS=Homo sapiens GN=PSMD10 PE=1 SV=1	26S proteasome non-ATPase regulatory subunit 10 OS=Mus musculus GN=Psmd10 PE=1 SV=3	24.527	cytoplasm			protein binding; binding;	K06694			IPR020683;	Ankyrin repeat-containing domain;
F1RXR2	Uncharacterized protein	1.91087	Up	0.00348	CRELD2	Cysteine-rich with EGF-like domain protein 2 OS=Homo sapiens GN=CRELD2 PE=1 SV=1	Cysteine-rich with EGF-like domain protein 2 OS=Mus musculus GN=Creld2 PE=2 SV=1	38.405	extracellular			cation binding; metal ion binding; protein binding; calcium ion binding; binding; ion binding;				IPR002049; IPR001881; IPR000742; IPR009030;	Laminin EGF domain; EGF-like calcium-binding domain; EGF-like domain; Growth factor receptor cysteine-rich domain;
F1RXS6	Cytochrome b-245 heavy chain	0.219542	Down	0.00894	CYBB			53.798	plasma membrane	single-organism process; metabolic process; oxidation-reduction process; single-organism metabolic process;	membrane;	catalytic activity; oxidoreductase activity;	K08008	NOX; NADPH oxidase	ssc04380 Osteoclast differentiation - Sus scrofa (pig); ssc04145 Phagosome - Sus scrofa (pig); ssc04066 HIF-1 signaling pathway - Sus scrofa (pig); ssc05418 Fluid shear stress and atherosclerosis - Sus scrofa (pig); ssc04621 NOD-like receptor signaling pathway - Sus scrofa (pig); ssc04670 Leukocyte transendothelial migration - Sus scrofa (pig); ssc04933 AGE-RAGE signaling pathway in diabetic comp…	IPR017927; IPR013121; IPR013112; IPR017938; IPR013130;	Ferredoxin reductase-type FAD-binding domain; Ferric reductase, NAD binding domain; FAD-binding 8; Riboflavin synthase-like beta-barrel; Ferric reductase transmembrane component-like domain;
F1RXT3	Uncharacterized protein	0.632641	Down	0.0101	PPP6R2	Serine/threonine-protein phosphatase 6 regulatory subunit 2 OS=Homo sapiens GN=PPP6R2 PE=1 SV=2	Serine/threonine-protein phosphatase 6 regulatory subunit 2 OS=Mus musculus GN=Ppp6r2 PE=1 SV=1	100.45	nucleus				K15500
F1RY06	Uncharacterized protein	0.554471	Down	0.0173	MANEA	"Glycoprotein endo-alpha-1,2-mannosidase OS=Homo sapiens GN=MANEA PE=1 SV=1"	"Glycoprotein endo-alpha-1,2-mannosidase OS=Mus musculus GN=Manea PE=2 SV=1"	53.788	extracellular			hydrolase activity; catalytic activity; hydrolase activity, acting on glycosyl bonds;	K15538
F1RY07	Uncharacterized protein	0.491233	Down	0.00101	C2orf76	UPF0538 protein C2orf76 OS=Homo sapiens GN=C2orf76 PE=1 SV=3	UPF0538 protein C2orf76 homolog OS=Mus musculus PE=2 SV=2	16.101	cytoplasm
F1RY11	Uncharacterized protein	0.465192	Down	0.00584	CCDC93	Coiled-coil domain-containing protein 93 OS=Homo sapiens GN=CCDC93 PE=1 SV=2	Coiled-coil domain-containing protein 93 OS=Mus musculus GN=Ccdc93 PE=2 SV=1	57.952	nucleus							IPR019159;	Coiled-coil domain of unkwon function DUF2037;
F1RY59	Uncharacterized protein	0.658052	Down	0.0347	C8orf37	Protein C8orf37 OS=Homo sapiens GN=C8orf37 PE=1 SV=1	Protein C8orf37 homolog OS=Mus musculus PE=1 SV=1	23.554	extracellular
F1RY93	Uncharacterized protein	0.543371	Down	0.0317	STK38	Serine/threonine-protein kinase 38 OS=Homo sapiens GN=STK38 PE=1 SV=1	Serine/threonine-protein kinase 38 OS=Mus musculus GN=Stk38 PE=1 SV=1	53.188	cytoplasm	phosphorylation; cellular protein metabolic process; primary metabolic process; cellular metabolic process; phosphate-containing compound metabolic process; organic substance metabolic process; metabolic process; protein phosphorylation; phosphorus metabolic process; cellular macromolecule metabolic process; cellular protein modification process; protein metabolic process; macromolecule metabolic…		ATP binding; nucleoside phosphate binding; phosphotransferase activity, alcohol group as acceptor; nucleoside binding; ion binding; nucleotide binding; protein kinase activity; organic cyclic compound binding; heterocyclic compound binding; ribonucleoside binding; carbohydrate derivative binding; kinase activity; ribonucleotide binding; catalytic activity; binding; purine ribonucleoside binding; …	K08790			IPR000719; IPR000961; IPR017892; IPR011009;	Protein kinase domain; AGC-kinase, C-terminal; Protein kinase, C-terminal; Protein kinase-like domain;
F1RYA1	Mitogen-activated protein kinase	0.605069	Down	0.00225	MAPK14			41.282	cytoplasm	phosphorylation; cellular protein metabolic process; primary metabolic process; cellular metabolic process; phosphate-containing compound metabolic process; organic substance metabolic process; metabolic process; protein phosphorylation; phosphorus metabolic process; cellular macromolecule metabolic process; cellular protein modification process; protein metabolic process; macromolecule metabolic…		ATP binding; nucleoside phosphate binding; phosphotransferase activity, alcohol group as acceptor; nucleoside binding; ion binding; protein kinase activity; nucleotide binding; signal transducer, downstream of receptor, with serine/threonine kinase activity; signal transducer activity; MAP kinase activity; organic cyclic compound binding; heterocyclic compound binding; ribonucleoside binding; sig…	K04441	P38; p38 MAP kinase [EC:2.7.11.24]	ssc04917 Prolactin signaling pathway - Sus scrofa (pig); ssc05145 Toxoplasmosis - Sus scrofa (pig); ssc04114 Oocyte meiosis - Sus scrofa (pig); ssc04659 Th17 cell differentiation - Sus scrofa (pig); ssc04750 Inflammatory mediator regulation of TRP channels - Sus scrofa (pig); ssc05205 Proteoglycans in cancer - Sus scrofa (pig); ssc04914 Progesterone-mediated oocyte maturation - Sus scrofa (pig); …	IPR000719; IPR011009;	Protein kinase domain; Protein kinase-like domain;
F1RYE7	Uncharacterized protein	1.84308	Up	0.0395	GPRASP2	G-protein coupled receptor-associated sorting protein 2 OS=Homo sapiens GN=GPRASP2 PE=1 SV=1	G-protein coupled receptor-associated sorting protein 2 OS=Mus musculus GN=Gprasp2 PE=2 SV=2	95.85	nucleus			binding;				IPR011989; IPR006911; IPR016024;	Armadillo-like helical; Armadillo repeat-containing domain; Armadillo-type fold;
F1RYJ8	Uncharacterized protein	1.50526	Up	0.0299	CSRP2	Cysteine and glycine-rich protein 2 OS=Homo sapiens GN=CSRP2 PE=1 SV=3	Cysteine and glycine-rich protein 2 OS=Mus musculus GN=Csrp2 PE=1 SV=3	20.95	nucleus			cation binding; metal ion binding; zinc ion binding; transition metal ion binding; binding; ion binding;	K09377			IPR001781;	Zinc finger, LIM-type;
F1RYL4	Secreted frizzled-related protein 3	0.285139	Down	0.0349	FRZB			36.165	extracellular			protein binding; binding;				IPR020067; IPR008993; IPR001134; IPR018933;	Frizzled domain; Tissue inhibitor of metalloproteinases-like, OB-fold; Netrin domain; Netrin module, non-TIMP type;
F1RYN1	Uncharacterized protein	0.356948	Down	4.47e-05	TNFAIP8L3	Tumor necrosis factor alpha-induced protein 8-like protein 3 OS=Homo sapiens GN=TNFAIP8L3 PE=2 SV=1	Tumor necrosis factor alpha-induced protein 8-like protein 3 OS=Mus musculus GN=Tnfaip8l3 PE=2 SV=1	23.169	cytoplasm
F1RYS1	Uncharacterized protein	1.71672	Up	0.0167	MRPL1	"39S ribosomal protein L1, mitochondrial OS=Homo sapiens GN=MRPL1 PE=1 SV=2"	"39S ribosomal protein L1, mitochondrial OS=Mus musculus GN=Mrpl1 PE=1 SV=2"	31.406	nucleus	peptide metabolic process; peptide biosynthetic process; cellular protein metabolic process; nitrogen compound metabolic process; biosynthetic process; cellular amide metabolic process; primary metabolic process; organonitrogen compound biosynthetic process; organic substance biosynthetic process; cellular metabolic process; cellular biosynthetic process; organic substance metabolic process; meta…	intracellular organelle; ribosome; intracellular non-membrane-bounded organelle; cytoplasm; intracellular organelle part; macromolecular complex; intracellular part; cell; mitochondrion; organelle part; non-membrane-bounded organelle; intracellular membrane-bounded organelle; organelle; large ribosomal subunit; cell part; ribosomal subunit; intracellular; ribonucleoprotein complex; membrane-bound…	organic cyclic compound binding; heterocyclic compound binding; RNA binding; binding; nucleic acid binding; structural molecule activity; structural constituent of ribosome;	K02863	RP-L1; large subunit ribosomal protein L1	ssc03010 Ribosome - Sus scrofa (pig);	IPR023674; IPR016095; IPR016094;	Ribosomal protein L1-like; Ribosomal protein L1, 3-layer alpha/beta-sandwich; Ribosomal protein L1, 2-layer alpha/beta-sandwich;
F1RYU6	Uncharacterized protein	1.68425	Up	0.0315	SDAD1	Protein SDA1 homolog OS=Homo sapiens GN=SDAD1 PE=1 SV=3	Protein SDA1 homolog OS=Mus musculus GN=Sdad1 PE=1 SV=1	79.628	nucleus			binding;	K14856			IPR012977; IPR016024; IPR007949;	Uncharacterised domain NUC130/133, N-terminal; Armadillo-type fold; SDA1 domain;
F1RYY0	Uncharacterized protein	0.398078	Down	0.00329	FKBP5	Peptidyl-prolyl cis-trans isomerase FKBP5 OS=Homo sapiens GN=FKBP5 PE=1 SV=2	Peptidyl-prolyl cis-trans isomerase FKBP5 OS=Mus musculus GN=Fkbp5 PE=1 SV=1	51.046	cytoplasm			protein binding; binding;	K09571	FKBP4_5; FK506-binding protein 4/5 [EC:5.2.1.8]	ssc04915 Estrogen signaling pathway - Sus scrofa (pig);	IPR011990; IPR023114; IPR013026; IPR001179;	Tetratricopeptide-like helical domain; Elongated TPR repeat-containing domain; Tetratricopeptide repeat-containing domain; FKBP-type peptidyl-prolyl cis-trans isomerase domain;
F1RYZ0	60S acidic ribosomal protein P2	1.75394	Up	0.00823	RPLP2			11.693	mitochondria	peptide metabolic process; translational elongation; peptide biosynthetic process; cellular protein metabolic process; nitrogen compound metabolic process; biosynthetic process; cellular amide metabolic process; primary metabolic process; organonitrogen compound biosynthetic process; organic substance biosynthetic process; cellular metabolic process; cellular biosynthetic process; organic substan…	ribosome; organelle; intracellular organelle; intracellular non-membrane-bounded organelle; cell part; intracellular; cytoplasm; macromolecular complex; intracellular part; ribonucleoprotein complex; cell; intracellular ribonucleoprotein complex; cytoplasmic part; non-membrane-bounded organelle;	structural constituent of ribosome; structural molecule activity;	K02943	RP-LP2; large subunit ribosomal protein LP2	ssc03010 Ribosome - Sus scrofa (pig);
F1RZ01	Uncharacterized protein	1.52998	Up	0.00392	CHID1	Chitinase domain-containing protein 1 OS=Homo sapiens GN=CHID1 PE=1 SV=1	Chitinase domain-containing protein 1 OS=Mus musculus GN=Chid1 PE=2 SV=1	44.553	mitochondria	glucosamine-containing compound metabolic process; chitin metabolic process; aminoglycan catabolic process; carbohydrate derivative catabolic process; nitrogen compound metabolic process; chitin catabolic process; carbohydrate metabolic process; primary metabolic process; glucosamine-containing compound catabolic process; organic substance metabolic process; organic substance catabolic process; m…		hydrolase activity, hydrolyzing O-glycosyl compounds; hydrolase activity; chitinase activity; catalytic activity; hydrolase activity, acting on glycosyl bonds;	K17525			IPR001223; IPR011583; IPR017853; IPR013781;	Glycoside hydrolase family 18, catalytic domain; Chitinase II; Glycoside hydrolase superfamily; Glycoside hydrolase, catalytic domain;
F1RZ16	U1 small nuclear ribonucleoprotein C	2.92492	Up	0.00349	SNRPC			17.394	nucleus	cellular component biogenesis; cellular component organization; ribonucleoprotein complex biogenesis; ribonucleoprotein complex assembly; cellular aromatic compound metabolic process; cellular metabolic process; organic substance metabolic process; mRNA splicing, via spliceosome; metabolic process; RNA splicing, via transesterification reactions with bulged adenosine as nucleophile; ribonucleopro…	U1 snRNP; intracellular organelle; intracellular organelle part; macromolecular complex; intracellular part; cell; organelle part; spliceosomal snRNP complex; intracellular membrane-bounded organelle; organelle; nucleus; cell part; intracellular; ribonucleoprotein complex; intracellular ribonucleoprotein complex; small nuclear ribonucleoprotein complex; membrane-bounded organelle; nuclear part;	organic cyclic compound binding; heterocyclic compound binding; transition metal ion binding; binding; nucleic acid binding; ion binding; metal ion binding; cation binding; zinc ion binding;	K11095	SNRPC; U1 small nuclear ribonucleoprotein C	ssc03040 Spliceosome - Sus scrofa (pig);	IPR013085; IPR003604; IPR000690;	Zinc finger, U1-C type; Zinc finger, U1-type; Zinc finger, C2H2-type matrin;
F1RZL2	Uncharacterized protein	0.384961	Down	0.000764	LOC102165804	Serine protease HTRA4 OS=Homo sapiens GN=HTRA4 PE=2 SV=1	Serine protease HTRA4 OS=Mus musculus GN=Htra4 PE=2 SV=1	35.568	extracellular	regulation of cell growth; regulation of cellular process; metabolic process; regulation of biological process; regulation of growth; proteolysis; macromolecule metabolic process; protein metabolic process; regulation of cellular component organization; primary metabolic process; organic substance metabolic process; biological regulation;	extracellular region;	insulin-like growth factor binding; serine-type endopeptidase activity; endopeptidase activity; peptidase activity; growth factor binding; catalytic activity; serine hydrolase activity; binding; serine-type peptidase activity; peptidase activity, acting on L-amino acid peptides; protein binding; hydrolase activity;				IPR009003; IPR002350; IPR000867; IPR009030;	Peptidase S1, PA clan; Kazal domain; Insulin-like growth factor-binding protein, IGFBP; Growth factor receptor cysteine-rich domain;
F1RZP9	Uncharacterized protein	0.391764	Down	0.000374	MICAL1	Protein-methionine sulfoxide oxidase MICAL1 OS=Homo sapiens GN=MICAL1 PE=1 SV=2	Protein-methionine sulfoxide oxidase MICAL1 OS=Mus musculus GN=Mical1 PE=1 SV=1	119.94	nucleus	single-organism process; metabolic process; oxidation-reduction process; single-organism metabolic process;		nucleoside phosphate binding; flavin adenine dinucleotide binding; ion binding; protein binding; nucleotide binding; zinc ion binding; cofactor binding; oxidoreductase activity; FAD binding; heterocyclic compound binding; organic cyclic compound binding; transition metal ion binding; catalytic activity; binding; cation binding; metal ion binding; anion binding; small molecule binding; coenzyme bi…	K19947			IPR001781; IPR002938; IPR022735; IPR001715; IPR023753;	Zinc finger, LIM-type; FAD-binding domain; Domain of unknown function DUF3585; Calponin homology domain; FAD/NAD(P)-binding domain;
F1RZT2	Uncharacterized protein	2.05962	Up	0.00172	PFDN6	Prefoldin subunit 6 OS=Homo sapiens GN=PFDN6 PE=1 SV=1	Prefoldin subunit 6 OS=Mus musculus GN=Pfdn6 PE=2 SV=1	14.597	cytoplasm	protein folding; cellular process;	prefoldin complex; macromolecular complex; protein complex;	protein binding; unfolded protein binding; binding;	K04798
F1RZV7	Uncharacterized protein	1.56974	Up	0.000224	GCLC	Glutamate--cysteine ligase catalytic subunit OS=Homo sapiens GN=GCLC PE=1 SV=2	Glutamate--cysteine ligase catalytic subunit OS=Mus musculus GN=Gclc PE=2 SV=4	72.935	cytoplasm	sulfur compound metabolic process; peptide metabolic process; peptide biosynthetic process; cellular modified amino acid biosynthetic process; nitrogen compound metabolic process; biosynthetic process; cellular amide metabolic process; organonitrogen compound biosynthetic process; organic substance biosynthetic process; cellular metabolic process; cellular biosynthetic process; sulfur compound bi…		ligase activity, forming carbon-nitrogen bonds; glutamate-cysteine ligase activity; acid-amino acid ligase activity; catalytic activity; ligase activity;	K11204	GCLC; glutamate--cysteine ligase catalytic subunit [EC:6.3.2.2]	ssc00480 Glutathione metabolism - Sus scrofa (pig); ssc00270 Cysteine and methionine metabolism - Sus scrofa (pig); ssc01100 Metabolic pathways - Sus scrofa (pig);
F1RZZ1	Uncharacterized protein	0.643931	Down	0.000504	TBCD	Tubulin-specific chaperone D OS=Homo sapiens GN=TBCD PE=1 SV=2	Tubulin-specific chaperone D OS=Mus musculus GN=Tbcd PE=2 SV=1	132.51	nucleus			binding;				IPR022577; IPR011989; IPR016024;	Tubulin-specific chaperone D, C-terminal; Armadillo-like helical; Armadillo-type fold;
F1RZZ3	Uncharacterized protein	1.51603	Up	0.0457	FN3KRP	Ketosamine-3-kinase OS=Homo sapiens GN=FN3KRP PE=1 SV=2	Ketosamine-3-kinase OS=Mus musculus GN=Fn3krp PE=2 SV=2	34.111	cytoplasm				K15523			IPR011009;	Protein kinase-like domain;
F1S061	Uncharacterized protein	0.581206	Down	0.0177	SCRN3	Secernin-3 OS=Homo sapiens GN=SCRN3 PE=1 SV=1	Secernin-3 OS=Mus musculus GN=Scrn3 PE=1 SV=1	28.976	cytoplasm	proteolysis; metabolic process; macromolecule metabolic process; protein metabolic process; primary metabolic process; organic substance metabolic process;		peptidase activity, acting on L-amino acid peptides; hydrolase activity; peptidase activity; exopeptidase activity; catalytic activity; dipeptidase activity;	K14358
F1S062	Uncharacterized protein	0.604605	Down	0.00193	OLA1	Obg-like ATPase 1 OS=Homo sapiens GN=OLA1 PE=1 SV=2	Obg-like ATPase 1 OS=Mus musculus GN=Ola1 PE=1 SV=1	27.584	cytoplasm			nucleoside phosphate binding; nucleoside binding; ion binding; nucleotide binding; organic cyclic compound binding; heterocyclic compound binding; ribonucleoside binding; carbohydrate derivative binding; ribonucleotide binding; binding; purine ribonucleoside binding; anion binding; purine ribonucleotide binding; purine nucleoside binding; guanyl ribonucleotide binding; guanyl nucleotide binding; …	K19788			IPR012676; IPR013029; IPR031167; IPR027417; IPR023192; IPR012675;	TGS-like; Domain of unknown function DUF933; OBG-type guanine nucleotide-binding (G) domain; P-loop containing nucleoside triphosphate hydrolase; TGS-like domain; Beta-grasp domain;
F1S084	Uncharacterized protein	0.649682	Down	0.0252	HAT1	Histone acetyltransferase type B catalytic subunit OS=Homo sapiens GN=HAT1 PE=1 SV=1	Histone acetyltransferase type B catalytic subunit OS=Mus musculus GN=Hat1 PE=2 SV=1	49.327	cytoplasm	single-organism process; negative regulation of RNA metabolic process; cellular metabolic process; regulation of RNA biosynthetic process; metabolic process; chromatin silencing at telomere; protein acylation; negative regulation of macromolecule biosynthetic process; macromolecule metabolic process; protein metabolic process; negative regulation of nucleic acid-templated transcription; regulatio…	organelle; intracellular membrane-bounded organelle; intracellular organelle; nucleus; cell part; intracellular; intracellular part; membrane-bounded organelle; cell;	peptide N-acetyltransferase activity; transferase activity, transferring acyl groups; histone acetyltransferase activity; catalytic activity; peptide-lysine-N-acetyltransferase activity; N-acetyltransferase activity; transferase activity; transferase activity, transferring acyl groups other than amino-acyl groups; acetyltransferase activity; N-acyltransferase activity;	K11303	HAT1; histone acetyltransferase 1 [EC:2.3.1.48]	ssc05034 Alcoholism - Sus scrofa (pig);	IPR016181; IPR019467;	Acyl-CoA N-acyltransferase; Histone acetyl transferase HAT1 N-terminal;
F1S091	Uncharacterized protein	0.57627	Down	0.00197	RAB8B	Ras-related protein Rab-8B OS=Homo sapiens GN=RAB8B PE=1 SV=2	Ras-related protein Rab-8B OS=Mus musculus GN=Rab8b PE=1 SV=1	22.812	cytoplasm	regulation of cellular process; single organism signaling; cellular response to stimulus; signal transduction; regulation of biological process; cell communication; intracellular signal transduction; single-organism process; small GTPase mediated signal transduction; signaling; response to stimulus; cellular process; biological regulation;		nucleoside phosphate binding; nucleoside binding; ion binding; nucleotide binding; organic cyclic compound binding; heterocyclic compound binding; ribonucleoside binding; carbohydrate derivative binding; ribonucleotide binding; binding; purine ribonucleoside binding; anion binding; purine ribonucleotide binding; purine nucleoside binding; guanyl ribonucleotide binding; guanyl nucleotide binding; …	K07902	RAB8B; Ras-related protein Rab-8B	ssc04530 Tight junction - Sus scrofa (pig);	IPR005225; IPR027417;	Small GTP-binding protein domain; P-loop containing nucleoside triphosphate hydrolase;
F1S0A2	Peptidyl-prolyl cis-trans isomerase	2.57225	Up	0.00161	---			19.358	extracellular	cellular protein metabolic process; primary metabolic process; peptidyl-proline modification; protein peptidyl-prolyl isomerization; cellular metabolic process; organic substance metabolic process; protein folding; peptidyl-amino acid modification; metabolic process; cellular macromolecule metabolic process; cellular protein modification process; protein metabolic process; macromolecule metabolic…		peptidyl-prolyl cis-trans isomerase activity; isomerase activity; catalytic activity; cis-trans isomerase activity;				IPR002130; IPR029000;	Cyclophilin-type peptidyl-prolyl cis-trans isomerase domain; Cyclophilin-like domain;
F1S0A3	Uncharacterized protein	0.549934	Down	0.0053	SNX1	Sorting nexin-1 OS=Homo sapiens GN=SNX1 PE=1 SV=3	Sorting nexin 1 OS=Mus musculus GN=Snx1 PE=2 SV=1	54.041	mitochondria	establishment of protein localization; transport; intracellular transport; cellular macromolecule localization; establishment of localization in cell; intracellular protein transport; organic substance transport; protein localization; macromolecule localization; cellular protein localization; localization; protein transport; establishment of localization; cellular localization;		lipid binding; anion binding; binding; phosphatidylinositol binding; phospholipid binding; ion binding;	K17917	SNX1_2; sorting nexin-1/2	ssc04144 Endocytosis - Sus scrofa (pig);	IPR015404; IPR005329; IPR001683;	Sorting nexin Vps5-like, C-terminal; Sorting nexin, N-terminal; Phox homologous domain;
F1S0C9	Uncharacterized protein	1.75514	Up	0.0165	UBE2J1	Ubiquitin-conjugating enzyme E2 J1 OS=Homo sapiens GN=UBE2J1 PE=1 SV=2	Ubiquitin-conjugating enzyme E2 J1 OS=Mus musculus GN=Ube2j1 PE=1 SV=2	35.132	cytoplasm				K10578	UBE2J1; ubiquitin-conjugating enzyme E2 J1 [EC:2.3.2.23]	ssc04120 Ubiquitin mediated proteolysis - Sus scrofa (pig); ssc05012 Parkinson's disease - Sus scrofa (pig); ssc04141 Protein processing in endoplasmic reticulum - Sus scrofa (pig);	IPR016135; IPR000608;	Ubiquitin-conjugating enzyme/RWD-like; Ubiquitin-conjugating enzyme E2;
F1S0D8	Uncharacterized protein	1.98503	Up	0.00446	UBXN4	UBX domain-containing protein 4 OS=Homo sapiens GN=UBXN4 PE=1 SV=2	UBX domain-containing protein 4 OS=Mus musculus GN=Ubxn4 PE=1 SV=1	53.802	nucleus			protein binding; binding;				IPR029071; IPR001012; IPR012336;	Ubiquitin-related domain; UBX domain; Thioredoxin-like fold;
F1S0D9	Uncharacterized protein	0.554729	Down	0.00144	DARS	"Aspartate--tRNA ligase, cytoplasmic OS=Homo sapiens GN=DARS PE=1 SV=2"	"Aspartate--tRNA ligase, cytoplasmic OS=Mus musculus GN=Dars PE=2 SV=2"	57.143	cytoplasm	peptide metabolic process; cellular aromatic compound metabolic process; cellular protein metabolic process; single-organism process; aspartyl-tRNA aminoacylation; biosynthetic process; organonitrogen compound biosynthetic process; tRNA aminoacylation; cellular metabolic process; organic substance metabolic process; metabolic process; cellular amino acid metabolic process; heterocycle metabolic p…	intracellular part; cell; cell part; intracellular; cytoplasm;	ligase activity, forming aminoacyl-tRNA and related compounds; ATP binding; nucleoside phosphate binding; aspartate-tRNA ligase activity; ligase activity, forming carbon-oxygen bonds; ligase activity; nucleoside binding; ion binding; nucleotide binding; organic cyclic compound binding; heterocyclic compound binding; ribonucleoside binding; carbohydrate derivative binding; catalytic activity; ribo…	K01876	DARS; aspartyl-tRNA synthetase [EC:6.1.1.12]	ssc00970 Aminoacyl-tRNA biosynthesis - Sus scrofa (pig);	IPR012340; IPR004364; IPR004365; IPR006195;	Nucleic acid-binding, OB-fold; Aminoacyl-tRNA synthetase, class II (D/K/N); OB-fold nucleic acid binding domain, AA-tRNA synthetase-type; Aminoacyl-tRNA synthetase, class II;
F1S0J2	Uncharacterized protein	0.332838	Down	0.000241	C4BPA	C4b-binding protein alpha chain OS=Homo sapiens GN=C4BPA PE=1 SV=2	Zona pellucida 3 receptor OS=Mus musculus GN=Zp3r PE=4 SV=1	67.366	extracellular				K04002	C4BPA; complement component 4 binding protein, alpha	ssc05133 Pertussis - Sus scrofa (pig); ssc04610 Complement and coagulation cascades - Sus scrofa (pig);	IPR000436;	Sushi/SCR/CCP domain;
F1S0J3	Uncharacterized protein	0.406994	Down	0.0135	C4BPB	C4b-binding protein beta chain OS=Homo sapiens GN=C4BPB PE=1 SV=1	Complement receptor type 2 OS=Mus musculus GN=Cr2 PE=4 SV=2	29.1	extracellular				K04003	C4BPB; complement component 4 binding protein, beta	ssc05133 Pertussis - Sus scrofa (pig); ssc04610 Complement and coagulation cascades - Sus scrofa (pig);	IPR000436;	Sushi/SCR/CCP domain;
F1S0L4	Uncharacterized protein	1.70056	Up	0.00501	P3H4	Synaptonemal complex protein SC65 OS=Homo sapiens GN=LEPREL4 PE=1 SV=1	Synaptonemal complex protein SC65 OS=Mus musculus GN=Leprel4 PE=2 SV=1	50.938	extracellular			protein binding; binding;				IPR011990;	Tetratricopeptide-like helical domain;
F1S0L8	Uncharacterized protein	2.54804	Up	0.00274	MTDH	Protein LYRIC OS=Homo sapiens GN=MTDH PE=1 SV=2	Protein LYRIC OS=Mus musculus GN=Mtdh PE=1 SV=1	63.966	cytoplasm	regulation of cellular process; regulation of cell death; negative regulation of programmed cell death; regulation of signaling; regulation of programmed cell death; positive regulation of intracellular signal transduction; negative regulation of biological process; negative regulation of cellular process; positive regulation of angiogenesis; regulation of multicellular organismal process; regula…
F1S0M2	Uncharacterized protein	2.4699	Up	9.2e-05	RIDA	Ribonuclease UK114 OS=Homo sapiens GN=HRSP12 PE=1 SV=1	Ribonuclease UK114 OS=Mus musculus GN=Hrsp12 PE=1 SV=3	14.369	cytoplasm							IPR013813;	Endoribonuclease L-PSP/chorismate mutase-like;
F1S0N2	Uncharacterized protein	0.641341	Down	0.00398	---	ATP-citrate synthase OS=Homo sapiens GN=ACLY PE=1 SV=3	ATP-citrate synthase OS=Mus musculus GN=Acly PE=1 SV=1	57.557	cytoplasm			ATP binding; nucleoside phosphate binding; nucleoside binding; ion binding; nucleotide binding; organic cyclic compound binding; heterocyclic compound binding; ribonucleoside binding; carbohydrate derivative binding; ribonucleotide binding; binding; purine ribonucleoside binding; anion binding; purine ribonucleotide binding; adenyl ribonucleotide binding; adenyl nucleotide binding; purine nucleos…	K01648	ACLY; ATP citrate (pro-S)-lyase [EC:2.3.3.8]	ssc00020 Citrate cycle (TCA cycle) - Sus scrofa (pig); ssc01100 Metabolic pathways - Sus scrofa (pig);	IPR032263; IPR013816; IPR016102;	ATP-citrate synthase, citrate-binding domain; ATP-grasp fold, subdomain 2; Succinyl-CoA synthetase-like;
F1S0R4	Uncharacterized protein	0.651206	Down	0.0136	ATP6V1C1	V-type proton ATPase subunit C 1 OS=Homo sapiens GN=ATP6V1C1 PE=1 SV=4	V-type proton ATPase subunit C 1 OS=Mus musculus GN=Atp6v1c1 PE=1 SV=4	44.032	cytoplasm	cation transmembrane transport; ion transmembrane transport; inorganic ion transmembrane transport; ATP hydrolysis coupled transmembrane transport; energy coupled proton transmembrane transport, against electrochemical gradient; single-organism process; hydrogen transport; proton transport; establishment of localization; transport; transmembrane transport; single-organism localization; cation tra…	macromolecular complex; membrane; proton-transporting two-sector ATPase complex, catalytic domain; proton-transporting V-type ATPase complex; protein complex; membrane protein complex; membrane part; proton-transporting two-sector ATPase complex; proton-transporting V-type ATPase, V1 domain;	ion transmembrane transporter activity; substrate-specific transporter activity; monovalent inorganic cation transmembrane transporter activity; inorganic cation transmembrane transporter activity; hydrogen ion transmembrane transporter activity; cation transmembrane transporter activity; substrate-specific transmembrane transporter activity; transporter activity; transmembrane transporter activi…	K02148	ATPeV1C; V-type H+-transporting ATPase subunit C	ssc04966 Collecting duct acid secretion - Sus scrofa (pig); ssc04721 Synaptic vesicle cycle - Sus scrofa (pig); ssc04150 mTOR signaling pathway - Sus scrofa (pig); ssc04145 Phagosome - Sus scrofa (pig); ssc00190 Oxidative phosphorylation - Sus scrofa (pig); ssc05323 Rheumatoid arthritis - Sus scrofa (pig); ssc01100 Metabolic pathways - Sus scrofa (pig);
F1S0R7	Uncharacterized protein	0.582321	Down	0.00368	NSUN2	tRNA (cytosine(34)-C(5))-methyltransferase OS=Homo sapiens GN=NSUN2 PE=1 SV=2	tRNA (cytosine(34)-C(5))-methyltransferase OS=Mus musculus GN=Nsun2 PE=1 SV=2	89.405	nucleus			tRNA (cytosine-5-)-methyltransferase activity; S-adenosylmethionine-dependent methyltransferase activity; methyltransferase activity; RNA methyltransferase activity; tRNA (cytosine) methyltransferase activity; catalytic activity; transferase activity, transferring one-carbon groups; tRNA methyltransferase activity; transferase activity;	K15335			IPR001678; IPR029063;	SAM-dependent methyltransferase RsmB/NOP2-type; S-adenosyl-L-methionine-dependent methyltransferase;
F1S0S6	Uncharacterized protein	0.618746	Down	0.0219	---	Hamartin OS=Homo sapiens GN=TSC1 PE=1 SV=2	Hamartin OS=Mus musculus GN=Tsc1 PE=1 SV=1	115.42	extracellular				K07206	TSC1; tuberous sclerosis 1	ssc04910 Insulin signaling pathway - Sus scrofa (pig); ssc04150 mTOR signaling pathway - Sus scrofa (pig); ssc04151 PI3K-Akt signaling pathway - Sus scrofa (pig); ssc05231 Choline metabolism in cancer - Sus scrofa (pig); ssc04072 Phospholipase D signaling pathway - Sus scrofa (pig); ssc04211 Longevity regulating pathway - Sus scrofa (pig); ssc04152 AMPK signaling pathway - Sus scrofa (pig); ssc04…
F1S0T6	Uncharacterized protein	0.505375	Down	0.000294	SEMA5A	Semaphorin-5A OS=Homo sapiens GN=SEMA5A PE=1 SV=3	"Sema domain, seven thrombospondin repeats (Type 1 and type 1-like), transmembrane domain (TM) and short cytoplasmic domain, (Semaphorin) 5A, isoform CRA_a OS=Mus musculus GN=Sema5a PE=2 SV=1"	120.86	extr_plas			protein binding; binding;	K06841	SEMA5; semaphorin 5	ssc04360 Axon guidance - Sus scrofa (pig);	IPR015943; IPR001627;	WD40/YVTN repeat-like-containing domain; Sema domain;
F1S0W4	Uncharacterized protein	1.62596	Up	0.0262	PRRC2B	Protein PRRC2B OS=Homo sapiens GN=PRRC2B PE=1 SV=2	Protein PRRC2B OS=Mus musculus GN=Prrc2b PE=2 SV=1	242.25	nucleus							IPR009738;	BAT2, N-terminal;
F1S179	Uncharacterized protein	1.83554	Up	0.000673	TSTD1	Thiosulfate sulfurtransferase/rhodanese-like domain-containing protein 1 OS=Homo sapiens GN=TSTD1 PE=1 SV=3	Protein Tstd1 OS=Mus musculus GN=Tstd1 PE=4 SV=1	14.34	cytoplasm							IPR001763;	Rhodanese-like domain;
F1S192	Uncharacterized protein	1.6832	Up	0.00178	PFDN2	Prefoldin subunit 2 OS=Homo sapiens GN=PFDN2 PE=1 SV=1	Prefoldin subunit 2 OS=Mus musculus GN=Pfdn2 PE=2 SV=2	16.697	cytoplasm	protein folding; cellular process;	prefoldin complex; macromolecular complex; protein complex;	protein binding; unfolded protein binding; binding;	K09549
F1S193	Uncharacterized protein	1.77106	Up	0.000463	NIT1	Nitrilase homolog 1 OS=Homo sapiens GN=NIT1 PE=1 SV=2	Nitrilase homolog 1 OS=Mus musculus GN=Nit1 PE=2 SV=2	34.447	cytoplasm	nitrogen compound metabolic process; metabolic process;		hydrolase activity; catalytic activity; hydrolase activity, acting on carbon-nitrogen (but not peptide) bonds;				IPR003010;	Carbon-nitrogen hydrolase;
F1S1B9	Uncharacterized protein	0.501709	Down	0.00179	DHRS11	Dehydrogenase/reductase SDR family member 11 OS=Homo sapiens GN=DHRS11 PE=1 SV=1	Dehydrogenase/reductase SDR family member 11 OS=Mus musculus GN=Dhrs11 PE=2 SV=1	27.672	extracellular			catalytic activity; oxidoreductase activity;				IPR016040;	NAD(P)-binding domain;
F1S1F3	Uncharacterized protein	1.57088	Up	0.012	COA3	"Cytochrome c oxidase assembly factor 3 homolog, mitochondrial OS=Homo sapiens GN=COA3 PE=1 SV=1"	"Cytochrome c oxidase assembly protein 3 homolog, mitochondrial OS=Mus musculus GN=Coa3 PE=2 SV=1"	11.738	plasma membrane				K18175
F1S1L1	Uncharacterized protein	2.37656	Up	2.92e-05	TIMM8A	Mitochondrial import inner membrane translocase subunit Tim8 A OS=Homo sapiens GN=TIMM8A PE=1 SV=1	Mitochondrial import inner membrane translocase subunit Tim8 A OS=Mus musculus GN=Timm8a1 PE=1 SV=1	11.041	extracellular				K17780			IPR004217;	Tim10/DDP family zinc finger;
F1S1M1	Uncharacterized protein	0.266525	Down	0.000117	LOC106507000	Synaptotagmin-like protein 4 OS=Homo sapiens GN=SYTL4 PE=1 SV=2	Synaptotagmin-like protein 4 OS=Mus musculus GN=Sytl4 PE=1 SV=1	63.55	nucleus	establishment of protein localization; transport; intracellular transport; cellular macromolecule localization; establishment of localization in cell; intracellular protein transport; organic substance transport; protein localization; macromolecule localization; cellular protein localization; localization; protein transport; establishment of localization; cellular localization;	membrane;	small GTPase binding; Ras GTPase binding; binding; protein binding; GTPase binding; enzyme binding; Rab GTPase binding;				IPR001565; IPR013083; IPR011011; IPR010911; IPR000008;	Synaptotagmin; Zinc finger, RING/FYVE/PHD-type; Zinc finger, FYVE/PHD-type; Rab-binding domain; C2 domain;
F1S1R4	SH3 domain-binding glutamic acid-rich-like protein	1.60977	Up	0.000493	SH3BGRL			11.481	cytoplasm							IPR012336;	Thioredoxin-like fold;
F1S1S9	Uncharacterized protein	1.56249	Up	0.0411	MAD2L1	Mitotic spindle assembly checkpoint protein MAD2A OS=Homo sapiens GN=MAD2L1 PE=1 SV=1	Mitotic spindle assembly checkpoint protein MAD2A OS=Mus musculus GN=Mad2l1 PE=1 SV=2	23.508	cyto_nucl				K02537	MAD2; mitotic spindle assembly checkpoint protein MAD2	ssc05166 HTLV-I infection - Sus scrofa (pig); ssc04914 Progesterone-mediated oocyte maturation - Sus scrofa (pig); ssc04114 Oocyte meiosis - Sus scrofa (pig); ssc04110 Cell cycle - Sus scrofa (pig);	IPR003511;	HORMA domain;
F1S1X3	Uncharacterized protein	0.633184	Down	0.000347	NARS	"Asparagine--tRNA ligase, cytoplasmic OS=Homo sapiens GN=NARS PE=1 SV=1"	"Asparagine--tRNA ligase, cytoplasmic OS=Mus musculus GN=Nars PE=2 SV=2"	64.526	cytoplasm	peptide metabolic process; cellular aromatic compound metabolic process; cellular protein metabolic process; single-organism process; biosynthetic process; asparaginyl-tRNA aminoacylation; organonitrogen compound biosynthetic process; tRNA aminoacylation; cellular metabolic process; organic substance metabolic process; metabolic process; cellular amino acid metabolic process; heterocycle metaboli…	intracellular part; cell; cell part; intracellular; cytoplasm;	ligase activity, forming aminoacyl-tRNA and related compounds; ATP binding; nucleoside phosphate binding; ligase activity, forming carbon-oxygen bonds; ligase activity; nucleoside binding; ion binding; nucleotide binding; organic cyclic compound binding; heterocyclic compound binding; ribonucleoside binding; carbohydrate derivative binding; catalytic activity; ribonucleotide binding; binding; nuc…	K01893	NARS; asparaginyl-tRNA synthetase [EC:6.1.1.22]	ssc00970 Aminoacyl-tRNA biosynthesis - Sus scrofa (pig);	IPR004364; IPR012340; IPR004365; IPR006195;	Aminoacyl-tRNA synthetase, class II (D/K/N); Nucleic acid-binding, OB-fold; OB-fold nucleic acid binding domain, AA-tRNA synthetase-type; Aminoacyl-tRNA synthetase, class II;
F1S1X9	Uncharacterized protein	0.565716	Down	0.00257	TXNL1	Thioredoxin-like protein 1 OS=Homo sapiens GN=TXNL1 PE=1 SV=3	Thioredoxin-like protein 1 OS=Mus musculus GN=Txnl1 PE=2 SV=3	32.281	cytoplasm	regulation of cellular process; homeostatic process; regulation of biological quality; regulation of biological process; cell redox homeostasis; single-organism cellular process; cellular homeostasis; single-organism process; cellular process; biological regulation;						IPR012336; IPR013766; IPR008979; IPR010400;	Thioredoxin-like fold; Thioredoxin domain; Galactose-binding domain-like; PITH domain;
F1S1Z3	Uncharacterized protein	0.218913	Down	4.95e-06	RAB27B	Ras-related protein Rab-27B OS=Homo sapiens GN=RAB27B PE=1 SV=4	Ras-related protein Rab-27B OS=Mus musculus GN=Rab27b PE=1 SV=3	18.533	cytoplasm	regulation of cellular process; single organism signaling; cellular response to stimulus; signal transduction; regulation of biological process; cell communication; intracellular signal transduction; single-organism process; small GTPase mediated signal transduction; signaling; response to stimulus; cellular process; biological regulation;		nucleoside phosphate binding; nucleoside binding; ion binding; nucleotide binding; organic cyclic compound binding; heterocyclic compound binding; ribonucleoside binding; carbohydrate derivative binding; ribonucleotide binding; binding; purine ribonucleoside binding; anion binding; purine ribonucleotide binding; purine nucleoside binding; guanyl ribonucleotide binding; guanyl nucleotide binding; …	K07886	RAB27B; Ras-related protein Rab-27B	ssc04972 Pancreatic secretion - Sus scrofa (pig);	IPR005225; IPR027417;	Small GTP-binding protein domain; P-loop containing nucleoside triphosphate hydrolase;
F1S216	Uncharacterized protein	1.96805	Up	0.0109	NUF2	Kinetochore protein Nuf2 OS=Homo sapiens GN=NUF2 PE=1 SV=2	Kinetochore protein Nuf2 OS=Mus musculus GN=Nuf2 PE=2 SV=2	54.456	cytoplasm	cellular component organization; mitotic cell cycle; organelle organization; mitotic nuclear division; organelle fission; single-organism cellular process; single-organism process; nuclear division; cell cycle process; cellular process; mitotic cell cycle process; cell cycle; cellular component organization or biogenesis;	chromosomal region; organelle; intracellular organelle; intracellular non-membrane-bounded organelle; cell part; intracellular; chromosome; chromosome, centromeric region; intracellular organelle part; intracellular part; cell; organelle part; chromosomal part; non-membrane-bounded organelle;		K11548
F1S232	4-trimethylaminobutyraldehyde dehydrogenase	0.524324	Down	0.00182	ALDH9A1			64.952	mitochondria	single-organism process; metabolic process; oxidation-reduction process; single-organism metabolic process;		oxidoreductase activity, acting on the aldehyde or oxo group of donors, NAD or NADP as acceptor; catalytic activity; oxidoreductase activity; oxidoreductase activity, acting on the aldehyde or oxo group of donors;	K00149	ALDH9A1; aldehyde dehydrogenase family 9 member A1 [EC:1.2.1.47 1.2.1.3]	ssc00620 Pyruvate metabolism - Sus scrofa (pig); ssc00071 Fatty acid degradation - Sus scrofa (pig); ssc00330 Arginine and proline metabolism - Sus scrofa (pig); ssc00310 Lysine degradation - Sus scrofa (pig); ssc00010 Glycolysis / Gluconeogenesis - Sus scrofa (pig); ssc00280 Valine, leucine and isoleucine degradation - Sus scrofa (pig); ssc00380 Tryptophan metabolism - Sus scrofa (pig); ssc00053…	IPR016161; IPR015590; IPR016162; IPR016163;	Aldehyde/histidinol dehydrogenase; Aldehyde dehydrogenase domain; Aldehyde dehydrogenase N-terminal domain; Aldehyde dehydrogenase, C-terminal;
F1S268	Uncharacterized protein	0.486073	Down	4.32e-05	CREG1	Protein CREG1 OS=Homo sapiens GN=CREG1 PE=1 SV=1	Protein CREG1 OS=Mus musculus GN=Creg1 PE=2 SV=1	24.218	extracellular	single-organism process; metabolic process; oxidation-reduction process; single-organism metabolic process;		organic cyclic compound binding; heterocyclic compound binding; carbohydrate derivative binding; nucleoside phosphate binding; catalytic activity; ribonucleotide binding; binding; ion binding; anion binding; nucleotide binding; FMN binding; cofactor binding; oxidoreductase activity; small molecule binding;				IPR012349;	FMN-binding split barrel;
F1S2A1	Uncharacterized protein	1.97272	Up	0.00112	ABCD1	ATP-binding cassette sub-family D member 1 OS=Homo sapiens GN=ABCD1 PE=1 SV=2	ATP-binding cassette sub-family D member 1 OS=Mus musculus GN=Abcd1 PE=1 SV=1	81.587	plasma membrane	lipid transport; peroxisomal long-chain fatty acid import; single-organism process; organic substance transport; lipid localization; carboxylic acid transport; organic acid transport; establishment of localization; transport; long-chain fatty acid transport; anion transport; transmembrane transport; organic anion transport; fatty acid transport; single-organism localization; monocarboxylic acid t…	membrane; intracellular organelle; peroxisome; cytoplasm; intrinsic component of membrane; intracellular part; cell; integral component of membrane; intracellular membrane-bounded organelle; organelle; intracellular; cell part; membrane part; microbody; membrane-bounded organelle; cytoplasmic part;	nucleoside phosphate binding; primary active transmembrane transporter activity; lipid transporter activity; substrate-specific transporter activity; hydrolase activity, acting on acid anhydrides; hydrolase activity; ATPase activity; organic cyclic compound binding; heterocyclic compound binding; pyrophosphatase activity; catalytic activity; ribonucleotide binding; ATPase activity, coupled to mov…	K05675	ABCD1; ATP-binding cassette, subfamily D (ALD), member 1	ssc04146 Peroxisome - Sus scrofa (pig); ssc02010 ABC transporters - Sus scrofa (pig);	IPR003593; IPR003439; IPR027417; IPR011527;	AAA+ ATPase domain; ABC transporter-like; P-loop containing nucleoside triphosphate hydrolase; ABC transporter type 1, transmembrane domain;
F1S2A8	Uncharacterized protein	1.97268	Up	0.00489	BCAP31	B-cell receptor-associated protein 31 OS=Homo sapiens GN=BCAP31 PE=1 SV=3	B-cell receptor-associated protein 31 OS=Mus musculus GN=Bcap31 PE=1 SV=4	27.859	extracellular	establishment of protein localization; transport; intracellular transport; cellular macromolecule localization; establishment of localization in cell; intracellular protein transport; organic substance transport; protein localization; macromolecule localization; cellular protein localization; localization; protein transport; establishment of localization; cellular localization;	membrane; intracellular organelle; endoplasmic reticulum; cytoplasm; intrinsic component of membrane; endomembrane system; intracellular part; cell; integral component of membrane; intracellular membrane-bounded organelle; organelle; intracellular; cell part; membrane part; membrane-bounded organelle; cytoplasmic part;		K14009	BCAP31; B-cell receptor-associated protein 31	ssc04141 Protein processing in endoplasmic reticulum - Sus scrofa (pig);
F1S2E2	Annexin	0.607363	Down	0.000468	ANXA11			53.943	cytoplasm			calcium-dependent phospholipid binding; binding; phospholipid binding; ion binding; lipid binding; cation binding; metal ion binding; anion binding; calcium ion binding;	K17095
F1S2E4	Uncharacterized protein	0.528761	Down	0.0002	ZMIZ1	Zinc finger MIZ domain-containing protein 1 OS=Homo sapiens GN=ZMIZ1 PE=1 SV=3	Zinc finger MIZ domain-containing protein 1 OS=Mus musculus GN=Zmiz1 PE=2 SV=1	116.08	nucleus			cation binding; metal ion binding; zinc ion binding; transition metal ion binding; binding; ion binding;				IPR004181; IPR013083;	Zinc finger, MIZ-type; Zinc finger, RING/FYVE/PHD-type;
F1S2G3	Uncharacterized protein	4.16838	Up	0.000111	TBCA	Tubulin-specific chaperone A OS=Homo sapiens GN=TBCA PE=1 SV=3	Tubulin-specific chaperone A OS=Mus musculus GN=Tbca PE=2 SV=3	12.441	cytoplasm	cellular component biogenesis; cellular component organization; cellular macromolecular complex assembly; protein complex subunit organization; tubulin complex assembly; macromolecular complex subunit organization; protein folding; cellular component assembly; macromolecular complex assembly; protein complex biogenesis; cellular process; protein complex assembly; post-chaperonin tubulin folding p…		tubulin binding; beta-tubulin binding; protein binding; cytoskeletal protein binding; binding;	K17292
F1S2G5	Uncharacterized protein	0.455553	Down	0.00783	ADK	Adenosine kinase OS=Homo sapiens GN=ADK PE=1 SV=2	Adenosine kinase OS=Mus musculus GN=Adk PE=1 SV=2	40.495	cyto_nucl	nucleoside metabolic process; purine nucleoside metabolic process; cellular aromatic compound metabolic process; single-organism process; purine ribonucleoside biosynthetic process; nucleoside biosynthetic process; biosynthetic process; organonitrogen compound biosynthetic process; nucleoside salvage; cellular metabolic process; organic substance metabolic process; metabolic process; carbohydrate…		kinase activity; nucleoside kinase activity; phosphotransferase activity, alcohol group as acceptor; catalytic activity; nucleobase-containing compound kinase activity; transferase activity; adenosine kinase activity; transferase activity, transferring phosphorus-containing groups;	K00856	E2.7.1.20; adenosine kinase [EC:2.7.1.20]	ssc00230 Purine metabolism - Sus scrofa (pig); ssc01100 Metabolic pathways - Sus scrofa (pig);	IPR011611; IPR029056;	Carbohydrate kinase PfkB; Ribokinase-like;
F1S2H7	Uncharacterized protein	0.616173	Down	0.000503	IQGAP2	Ras GTPase-activating-like protein IQGAP2 OS=Homo sapiens GN=IQGAP2 PE=1 SV=4	Ras GTPase-activating-like protein IQGAP2 OS=Mus musculus GN=Iqgap2 PE=1 SV=2	96.255	nucleus	regulation of cellular process; single organism signaling; cellular response to stimulus; signal transduction; regulation of biological process; cell communication; regulation of hydrolase activity; regulation of catalytic activity; single-organism process; regulation of molecular function; regulation of GTPase activity; signaling; response to stimulus; cellular process; biological regulation;		protein binding; binding;				IPR001936; IPR001202; IPR008936;	Ras GTPase-activating protein; WW domain; Rho GTPase activation protein;
F1S2H8	Uncharacterized protein	0.634957	Down	9.07e-05	---	Ras GTPase-activating-like protein IQGAP2 OS=Homo sapiens GN=IQGAP2 PE=1 SV=4	Ras GTPase-activating-like protein IQGAP2 OS=Mus musculus GN=Iqgap2 PE=1 SV=2	35.183	cytoplasm			protein binding; binding;				IPR001715;	Calponin homology domain;
F1S2V7	Uncharacterized protein	0.51089	Down	0.0185	PPP2R5A	Serine/threonine-protein phosphatase 2A 56 kDa regulatory subunit alpha isoform OS=Homo sapiens GN=PPP2R5A PE=1 SV=1	Serine/threonine-protein phosphatase 2A 56 kDa regulatory subunit alpha isoform OS=Mus musculus GN=Ppp2r5a PE=2 SV=1	56.36	cytoplasm	regulation of cellular process; single organism signaling; cellular response to stimulus; signal transduction; regulation of biological process; cell communication; single-organism process; signaling; response to stimulus; cellular process; biological regulation;	catalytic complex; cell part; intracellular; protein serine/threonine phosphatase complex; macromolecular complex; intracellular part; cell; phosphatase complex; protein phosphatase type 2A complex;	molecular function regulator; enzyme regulator activity; binding; protein phosphatase regulator activity; phosphatase regulator activity;	K11584	PPP2R5; serine/threonine-protein phosphatase 2A regulatory subunit B'	ssc04071 Sphingolipid signaling pathway - Sus scrofa (pig); ssc04728 Dopaminergic synapse - Sus scrofa (pig); ssc04151 PI3K-Akt signaling pathway - Sus scrofa (pig); ssc04114 Oocyte meiosis - Sus scrofa (pig); ssc03015 mRNA surveillance pathway - Sus scrofa (pig); ssc04261 Adrenergic signaling in cardiomyocytes - Sus scrofa (pig); ssc04152 AMPK signaling pathway - Sus scrofa (pig);	IPR016024;	Armadillo-type fold;
F1S2Y2	Uncharacterized protein	0.559209	Down	0.00231	PROX1	Prospero homeobox protein 1 OS=Homo sapiens GN=PROX1 PE=1 SV=2	Prospero homeobox protein 1 OS=Mus musculus GN=Prox1 PE=1 SV=2	83.199	nucleus			organic cyclic compound binding; heterocyclic compound binding; DNA binding; binding; nucleic acid binding;	K20211			IPR009057; IPR023082;	Homeobox domain-like; Homeo-prospero domain;
F1S2Y5	Uncharacterized protein	1.62829	Up	0.00167	CENPF	Centromere protein F OS=Homo sapiens GN=CENPF PE=1 SV=2	Protein Cenpf OS=Mus musculus GN=Cenpf PE=2 SV=1	296.02	nucleus			dynein complex binding; identical protein binding; protein homodimerization activity; binding; protein dimerization activity; macromolecular complex binding; protein binding; transcription factor binding; protein complex binding;	K11499			IPR018463; IPR019513;	Centromere protein Cenp-F, N-terminal; Centromere protein Cenp-F, leucine-rich repeat-containing domain;
F1S340	Uncharacterized protein	0.471223	Down	0.000261	SRI	Sorcin OS=Homo sapiens GN=SRI PE=1 SV=1	Sorcin OS=Mus musculus GN=Sri PE=1 SV=1	21.733	extracellular			cation binding; metal ion binding; calcium ion binding; binding; ion binding;				IPR011992; IPR002048;	EF-hand domain pair; EF-hand domain;
F1S346	Kinesin-like protein	2.26507	Up	0.048	KIF2C			80.864	nucleus	single-organism cellular process; microtubule-based movement; movement of cell or subcellular component; single-organism process; cellular process; microtubule-based process;		motor activity; nucleoside phosphate binding; hydrolase activity, acting on acid anhydrides; protein binding; hydrolase activity; organic cyclic compound binding; heterocyclic compound binding; cytoskeletal protein binding; pyrophosphatase activity; catalytic activity; ribonucleotide binding; microtubule binding; binding; purine ribonucleoside binding; anion binding; adenyl ribonucleotide binding…	K10393			IPR027417; IPR001752;	P-loop containing nucleoside triphosphate hydrolase; Kinesin motor domain;
F1S395	Uncharacterized protein	0.524537	Down	3.51e-05	NQO1	NAD(P)H dehydrogenase [quinone] 1 OS=Homo sapiens GN=NQO1 PE=1 SV=1	NAD(P)H dehydrogenase [quinone] 1 OS=Mus musculus GN=Nqo1 PE=1 SV=3	30.954	cytoplasm				K00355	NQO1; NAD(P)H dehydrogenase (quinone) [EC:1.6.5.2]	ssc00130 Ubiquinone and other terpenoid-quinone biosynthesis - Sus scrofa (pig); ssc05418 Fluid shear stress and atherosclerosis - Sus scrofa (pig);	IPR003680; IPR029039;	Flavodoxin-like fold; Flavoprotein-like domain;
F1S398	Uncharacterized protein	2.6289	Up	0.000106	CLTB	Clathrin light chain B OS=Homo sapiens GN=CLTB PE=1 SV=1	Clathrin light chain B OS=Mus musculus GN=Cltb PE=2 SV=1	18.851	cytoplasm	establishment of protein localization; transport; intracellular transport; cellular macromolecule localization; establishment of localization in cell; vesicle-mediated transport; intracellular protein transport; organic substance transport; protein localization; macromolecule localization; cellular protein localization; localization; protein transport; establishment of localization; cellular loca…	transport vesicle membrane; membrane; clathrin coat of trans-Golgi network vesicle; cytoplasmic vesicle; organelle membrane; membrane protein complex; cell periphery; vesicle; Golgi-associated vesicle membrane; cytoplasm; cytoplasmic vesicle part; macromolecular complex; intracellular part; vesicle coat; cell; organelle part; coated vesicle membrane; trans-Golgi network transport vesicle; clathri…	structural molecule activity;	K04645	CLTB; clathrin light chain B	ssc04961 Endocrine and other factor-regulated calcium reabsorption - Sus scrofa (pig); ssc04144 Endocytosis - Sus scrofa (pig); ssc04721 Synaptic vesicle cycle - Sus scrofa (pig); ssc04142 Lysosome - Sus scrofa (pig); ssc05016 Huntington's disease - Sus scrofa (pig); ssc05100 Bacterial invasion of epithelial cells - Sus scrofa (pig);
F1S3A8	Uncharacterized protein	0.632899	Down	0.0293	DHX38	Pre-mRNA-splicing factor ATP-dependent RNA helicase PRP16 OS=Homo sapiens GN=DHX38 PE=1 SV=2	DEAH (Asp-Glu-Ala-His) box polypeptide 38 OS=Mus musculus GN=Dhx38 PE=2 SV=1	86.262	nucleus			nucleoside phosphate binding; ATP-dependent helicase activity; hydrolase activity, acting on acid anhydrides; hydrolase activity; ATPase activity; organic cyclic compound binding; heterocyclic compound binding; pyrophosphatase activity; catalytic activity; ribonucleotide binding; binding; purine ribonucleoside binding; anion binding; adenyl ribonucleotide binding; adenyl nucleotide binding; hydro…	K12815	DHX38; pre-mRNA-splicing factor ATP-dependent RNA helicase DHX38/PRP16 [EC:3.6.4.13]	ssc03040 Spliceosome - Sus scrofa (pig);	IPR007502; IPR011545; IPR011709; IPR014001; IPR027417; IPR001650;	Helicase-associated domain; DEAD/DEAH box helicase domain; Domain of unknown function DUF1605; Helicase superfamily 1/2, ATP-binding domain; P-loop containing nucleoside triphosphate hydrolase; Helicase, C-terminal;
F1S3H7	Uncharacterized protein	0.425732	Down	0.00209	PTGR2	Prostaglandin reductase 2 OS=Homo sapiens GN=PTGR2 PE=1 SV=1	Prostaglandin reductase 2 OS=Mus musculus GN=Ptgr2 PE=1 SV=2	38.5	cytoplasm	single-organism process; metabolic process; oxidation-reduction process; single-organism metabolic process;			K13949			IPR011032; IPR016040; IPR013149;	GroES-like; NAD(P)-binding domain; Alcohol dehydrogenase, C-terminal;
F1S3H9	Uncharacterized protein	0.397941	Down	1.52e-05	LOC100517145	Complement C3 OS=Homo sapiens GN=C3 PE=1 SV=2	Complement C3 OS=Mus musculus GN=C3 PE=1 SV=3	186.55	extracellular		extracellular space; extracellular region part; extracellular region;	enzyme regulator activity; binding; peptidase inhibitor activity; peptidase regulator activity; protein binding; endopeptidase regulator activity; enzyme inhibitor activity; molecular function regulator; endopeptidase inhibitor activity;				IPR008993; IPR001599; IPR011626; IPR000020; IPR002890; IPR011625; IPR009048; IPR001134; IPR008930; IPR018933; IPR019565; IPR018081;	Tissue inhibitor of metalloproteinases-like, OB-fold; Alpha-2-macroglobulin; Alpha-macroglobulin complement component; Anaphylatoxin/fibulin; Alpha-2-macroglobulin, N-terminal; Alpha-2-macroglobulin, N-terminal 2; Alpha-macroglobulin, receptor-binding; Netrin domain; Terpenoid cyclases/protein prenyltransferase alpha-alpha toroid; Netrin module, non-TIMP type; Alpha-2-macroglobulin, thiol-ester b…
F1S3I5	DNA (cytosine-5)-methyltransferase	1.6745	Up	0.00177	DNMT1			182.67	mitochondria	DNA alkylation; cellular aromatic compound metabolic process; DNA metabolic process; organic cyclic compound metabolic process; nitrogen compound metabolic process; primary metabolic process; cellular metabolic process; C-5 methylation of cytosine; methylation; organic substance metabolic process; DNA methylation on cytosine; metabolic process; heterocycle metabolic process; nucleic acid metaboli…	organelle; intracellular membrane-bounded organelle; intracellular organelle; nucleus; cell part; intracellular; intracellular part; membrane-bounded organelle; cell;	S-adenosylmethionine-dependent methyltransferase activity; DNA binding; methyltransferase activity; DNA-methyltransferase activity; ion binding; transferase activity, transferring one-carbon groups; chromatin binding; zinc ion binding; heterocyclic compound binding; organic cyclic compound binding; transition metal ion binding; catalytic activity; binding; nucleic acid binding; metal ion binding;…	K00558	DNMT1; DNA (cytosine-5)-methyltransferase 1 [EC:2.1.1.37]	ssc05206 MicroRNAs in cancer - Sus scrofa (pig); ssc00270 Cysteine and methionine metabolism - Sus scrofa (pig); ssc01100 Metabolic pathways - Sus scrofa (pig);	IPR010506; IPR029063; IPR022702; IPR001025; IPR002857;	DMAP1-binding domain; S-adenosyl-L-methionine-dependent methyltransferase; DNA (cytosine-5)-methyltransferase 1, replication foci domain; Bromo adjacent homology (BAH) domain; Zinc finger, CXXC-type;
F1S3L2	Uncharacterized protein	0.505469	Down	0.000254	ZFYVE1	Zinc finger FYVE domain-containing protein 1 OS=Homo sapiens GN=ZFYVE1 PE=1 SV=1	Zinc finger FYVE domain-containing protein 1 OS=Mus musculus GN=Zfyve1 PE=2 SV=2	86.938	nucleus			metal ion binding; cation binding; binding; ion binding;	K17603	ZFYVE1; zinc finger FYVE domain-containing protein 1	ssc04140 Autophagy - animal - Sus scrofa (pig);	IPR000306; IPR017455; IPR013083; IPR027417; IPR011011;	FYVE zinc finger; Zinc finger, FYVE-related; Zinc finger, RING/FYVE/PHD-type; P-loop containing nucleoside triphosphate hydrolase; Zinc finger, FYVE/PHD-type;
F1S3M9	Uncharacterized protein	0.564467	Down	2.53e-06	EPB41L2	Band 4.1-like protein 2 OS=Homo sapiens GN=EPB41L2 PE=1 SV=1	Band 4.1-like protein 2 OS=Mus musculus GN=Epb41l2 PE=1 SV=2	94.069	cytoplasm	cellular component organization; single-organism organelle organization; actin cytoskeleton organization; cortical actin cytoskeleton organization; organelle organization; actin filament-based process; single-organism cellular process; single-organism process; cytoskeleton organization; cortical cytoskeleton organization; cellular process; cellular component organization or biogenesis;	membrane; cytoskeleton; organelle; intracellular organelle; extrinsic component of membrane; intracellular non-membrane-bounded organelle; membrane part; cell part; intracellular; cytoplasm; intracellular part; cell; non-membrane-bounded organelle;	actin binding; protein binding; cytoskeletal protein binding; structural molecule activity; binding;	K06107			IPR019748; IPR018980; IPR018979; IPR019749; IPR008379; IPR011993; IPR029071; IPR007477; IPR014847; IPR014352; IPR000299;	FERM central domain; FERM, C-terminal PH-like domain; FERM, N-terminal; Band 4.1 domain; Band 4.1, C-terminal; PH domain-like; Ubiquitin-related domain; SAB domain; FERM adjacent (FA); FERM/acyl-CoA-binding protein, 3-helical bundle; FERM domain;
F1S3N6	Uncharacterized protein	1.91635	Up	0.000955	RNF2	E3 ubiquitin-protein ligase RING2 OS=Homo sapiens GN=RNF2 PE=1 SV=1	E3 ubiquitin-protein ligase RING2 OS=Mus musculus GN=Rnf2 PE=1 SV=1	37.639	nucleus			cation binding; metal ion binding; protein binding; zinc ion binding; transition metal ion binding; binding; ion binding;	K10695			IPR032443; IPR001841; IPR013083;	RAWUL domain; Zinc finger, RING-type; Zinc finger, RING/FYVE/PHD-type;
F1S3P8	Uncharacterized protein	3.04131	Up	0.00125	STX7	Syntaxin-7 OS=Homo sapiens GN=STX7 PE=1 SV=4	Syntaxin 7 OS=Mus musculus GN=Stx7 PE=2 SV=1	29.864	plasma membrane	establishment of protein localization; transport; intracellular transport; cellular macromolecule localization; establishment of localization in cell; vesicle-mediated transport; intracellular protein transport; organic substance transport; protein localization; macromolecule localization; cellular protein localization; localization; protein transport; establishment of localization; cellular loca…	membrane;	SNAP receptor activity; protein binding; binding;	K08488	STX7; syntaxin 7	ssc04145 Phagosome - Sus scrofa (pig); ssc04130 SNARE interactions in vesicular transport - Sus scrofa (pig);	IPR000727; IPR010989; IPR006011;	Target SNARE coiled-coil homology domain; SNARE; Syntaxin, N-terminal domain;
F1S3T0	Glucosamine-6-phosphate isomerase	1.60024	Up	0.0017	GNPDA2			31.194	cytoplasm	glucosamine-containing compound metabolic process; N-acetylglucosamine metabolic process; metabolic process; carbohydrate derivative metabolic process; amino sugar metabolic process; primary metabolic process; carbohydrate metabolic process; organic substance metabolic process;		glucosamine-6-phosphate deaminase activity; deaminase activity; isomerase activity; intramolecular oxidoreductase activity; catalytic activity; intramolecular oxidoreductase activity, interconverting aldoses and ketoses;	K02564	nagB; glucosamine-6-phosphate deaminase [EC:3.5.99.6]	ssc00520 Amino sugar and nucleotide sugar metabolism - Sus scrofa (pig); ssc01100 Metabolic pathways - Sus scrofa (pig);	IPR006148;	Glucosamine/galactosamine-6-phosphate isomerase;
F1S405	Uncharacterized protein	0.3195	Down	0.0248	LTBP1	Latent-transforming growth factor beta-binding protein 1 OS=Homo sapiens GN=LTBP1 PE=1 SV=4	Latent-transforming growth factor beta-binding protein 1 OS=Mus musculus GN=Ltbp1 PE=2 SV=2	148.14	extracellular			cation binding; metal ion binding; protein binding; calcium ion binding; binding; ion binding;	K19559	LTBP1; latent transforming growth factor beta binding protein 1	ssc04350 TGF-beta signaling pathway - Sus scrofa (pig);	IPR017878; IPR001881; IPR000742; IPR009030;	TB domain; EGF-like calcium-binding domain; EGF-like domain; Growth factor receptor cysteine-rich domain;
F1S409	Uncharacterized protein	0.616871	Down	0.000812	---	SEC23-interacting protein OS=Homo sapiens GN=SEC23IP PE=1 SV=1	SEC23-interacting protein OS=Mus musculus GN=Sec23ip PE=2 SV=2	88.18	nucleus			protein binding; binding;				IPR013761; IPR001660;	Sterile alpha motif/pointed domain; Sterile alpha motif domain;
F1S420	Uncharacterized protein	2.56971	Up	0.0126	---	Heterogeneous nuclear ribonucleoprotein A/B OS=Homo sapiens GN=HNRNPAB PE=1 SV=2	Heterogeneous nuclear ribonucleoprotein A/B OS=Mus musculus GN=Hnrnpab PE=1 SV=1	31.531	nucleus			organic cyclic compound binding; heterocyclic compound binding; nucleoside phosphate binding; binding; nucleic acid binding; nucleotide binding; small molecule binding;				IPR000504; IPR012956; IPR012677;	RNA recognition motif domain; CARG-binding factor, N-terminal; Nucleotide-binding alpha-beta plait domain;
F1S431	"Alanine--tRNA ligase, cytoplasmic"	0.651705	Down	0.000941	AARS			105.59	cytoplasm	peptide metabolic process; cellular aromatic compound metabolic process; cellular protein metabolic process; single-organism process; biosynthetic process; organonitrogen compound biosynthetic process; tRNA aminoacylation; cellular metabolic process; organic substance metabolic process; metabolic process; cellular amino acid metabolic process; heterocycle metabolic process; nucleobase-containing …	intracellular part; cell; cell part; intracellular; cytoplasm;	ligase activity, forming aminoacyl-tRNA and related compounds; ATP binding; nucleoside phosphate binding; ligase activity, forming carbon-oxygen bonds; nucleoside binding; ion binding; ligase activity; nucleotide binding; organic cyclic compound binding; heterocyclic compound binding; ribonucleoside binding; carbohydrate derivative binding; catalytic activity; ribonucleotide binding; binding; nuc…	K01872	AARS; alanyl-tRNA synthetase [EC:6.1.1.7]	ssc00970 Aminoacyl-tRNA biosynthesis - Sus scrofa (pig);	IPR018163; IPR018164; IPR012947; IPR018162; IPR003156; IPR009000; IPR018165;	Threonyl/alanyl tRNA synthetase, class II-like, putative editing domain; Alanyl-tRNA synthetase, class IIc, N-terminal; Threonyl/alanyl tRNA synthetase, SAD; Alanine-tRNA ligase, class IIc, anti-codon-binding domain; DHHA1 domain; Translation protein, beta-barrel domain; Alanyl-tRNA synthetase, class IIc, core domain;
F1S445	Uncharacterized protein	0.551416	Down	0.000111	SQSTM1	Sequestosome-1 OS=Homo sapiens GN=SQSTM1 PE=1 SV=1	Sequestosome-1 OS=Mus musculus GN=Sqstm1 PE=1 SV=1	47.788	nucleus			cation binding; metal ion binding; protein binding; zinc ion binding; transition metal ion binding; binding; ion binding;	K14381	SQSTM1; sequestosome 1	ssc04380 Osteoclast differentiation - Sus scrofa (pig); ssc05418 Fluid shear stress and atherosclerosis - Sus scrofa (pig);	IPR000270; IPR015940; IPR000433; IPR009060; IPR033741;	PB1 domain; Ubiquitin-associated domain; Zinc finger, ZZ-type; UBA-like; Sequestosome-1, UBA domain;
F1S4J0	Uncharacterized protein	1.90407	Up	0.0127	FAM114A1	Protein NOXP20 OS=Homo sapiens GN=FAM114A1 PE=1 SV=2	Protein Noxp20 OS=Mus musculus GN=Fam114a1 PE=2 SV=1	60.468	nucleus
F1S4J6	Cathepsin L1	1.62658	Up	0.00186	CTSL			37.106	extracellular	proteolysis; metabolic process; macromolecule metabolic process; protein metabolic process; primary metabolic process; organic substance metabolic process;		peptidase activity, acting on L-amino acid peptides; cysteine-type peptidase activity; hydrolase activity; peptidase activity; catalytic activity;	K01365	CTSL; cathepsin L [EC:3.4.22.15]	ssc05418 Fluid shear stress and atherosclerosis - Sus scrofa (pig); ssc04142 Lysosome - Sus scrofa (pig); ssc05205 Proteoglycans in cancer - Sus scrofa (pig); ssc04145 Phagosome - Sus scrofa (pig); ssc04210 Apoptosis - Sus scrofa (pig); ssc05323 Rheumatoid arthritis - Sus scrofa (pig); ssc04140 Autophagy - animal - Sus scrofa (pig); ssc04612 Antigen processing and presentation - Sus scrofa (pig);	IPR013201; IPR000668;	Cathepsin propeptide inhibitor domain (I29); Peptidase C1A, papain C-terminal;
F1S4K5	Uncharacterized protein	0.613826	Down	0.00486	---	TBC1 domain family member 1 OS=Homo sapiens GN=TBC1D1 PE=1 SV=2	TBC1 domain family member 1 OS=Mus musculus GN=Tbc1d1 PE=2 SV=1	55.888	cytoplasm				K18341	TBC1D1; TBC1 domain family member 1	ssc04152 AMPK signaling pathway - Sus scrofa (pig);	IPR021785; IPR000195;	Domain of unknown function DUF3350; Rab-GTPase-TBC domain;
F1S4K7	Uncharacterized protein	2.02611	Up	0.0498	PGM2	Phosphoglucomutase-2 OS=Homo sapiens GN=PGM2 PE=1 SV=4	Phosphoglucomutase-2 OS=Mus musculus GN=Pgm2 PE=1 SV=1	69.858	cytoplasm	metabolic process; carbohydrate metabolic process; primary metabolic process; organic substance metabolic process;		magnesium ion binding; isomerase activity; catalytic activity; binding; intramolecular transferase activity, phosphotransferases; ion binding; metal ion binding; cation binding; intramolecular transferase activity;	K15779	PGM2; phosphoglucomutase / phosphopentomutase [EC:5.4.2.2 5.4.2.7]	ssc00230 Purine metabolism - Sus scrofa (pig); ssc00030 Pentose phosphate pathway - Sus scrofa (pig); ssc00052 Galactose metabolism - Sus scrofa (pig); ssc00010 Glycolysis / Gluconeogenesis - Sus scrofa (pig); ssc00520 Amino sugar and nucleotide sugar metabolism - Sus scrofa (pig); ssc00500 Starch and sucrose metabolism - Sus scrofa (pig); ssc01100 Metabolic pathways - Sus scrofa (pig);	IPR005843; IPR005846; IPR005845; IPR016055; IPR005844;	Alpha-D-phosphohexomutase, C-terminal; Alpha-D-phosphohexomutase, alpha/beta/alpha domain III; Alpha-D-phosphohexomutase, alpha/beta/alpha domain II; Alpha-D-phosphohexomutase, alpha/beta/alpha I/II/III; Alpha-D-phosphohexomutase, alpha/beta/alpha domain I;
F1S4P0	Uncharacterized protein	1.87534	Up	0.00847	STRN	Striatin OS=Homo sapiens GN=STRN PE=1 SV=4	Striatin OS=Mus musculus GN=Strn PE=1 SV=2	86.233	nucleus			protein binding; binding;	K17608			IPR017986; IPR015943; IPR013258;	WD40-repeat-containing domain; WD40/YVTN repeat-like-containing domain; Striatin, N-terminal;
F1S4Q5	Uncharacterized protein	1.82378	Up	0.0366	EMX2	Homeobox protein EMX2 OS=Homo sapiens GN=EMX2 PE=1 SV=2	Homeobox protein EMX2 OS=Mus musculus GN=Emx2 PE=2 SV=3	22.421	nucleus			organic cyclic compound binding; heterocyclic compound binding; DNA binding; binding; nucleic acid binding;	K09317			IPR001356; IPR009057;	Homeobox domain; Homeobox domain-like;
F1S4Q6	Uncharacterized protein	1.77521	Up	0.0257	CEBPZ	CCAAT/enhancer-binding protein zeta OS=Homo sapiens GN=CEBPZ PE=1 SV=3	CCAAT/enhancer-binding protein zeta OS=Mus musculus GN=Cebpz PE=1 SV=2	120.71	nucleus			binding;	K14832			IPR005612; IPR016024;	CCAAT-binding factor; Armadillo-type fold;
F1S4U9	Uncharacterized protein	0.582255	Down	0.00887	EML4	Echinoderm microtubule-associated protein-like 4 OS=Homo sapiens GN=EML4 PE=1 SV=3	Echinoderm microtubule-associated protein-like 4 OS=Mus musculus GN=Eml4 PE=2 SV=1	109.58	plasma membrane			protein binding; binding;	K15420	EML4; echinoderm microtubule-associated protein-like 4	ssc05223 Non-small cell lung cancer - Sus scrofa (pig);	IPR005108; IPR017986; IPR015943; IPR011047;	HELP; WD40-repeat-containing domain; WD40/YVTN repeat-like-containing domain; Quinoprotein alcohol dehydrogenase-like superfamily;
F1S4V5	Uncharacterized protein	0.194796	Down	0.0391	ABLIM1	Actin-binding LIM protein 1 OS=Homo sapiens GN=ABLIM1 PE=1 SV=3	Actin-binding LIM protein 1 OS=Mus musculus GN=Ablim1 PE=1 SV=1	89.92	nucleus	cellular component organization; cytoskeleton organization; cellular process; organelle organization; cellular component organization or biogenesis;		cytoskeletal protein binding; transition metal ion binding; binding; ion binding; actin binding; metal ion binding; cation binding; protein binding; zinc ion binding;	K07520	ABLIM; actin-binding LIM protein	ssc04360 Axon guidance - Sus scrofa (pig);	IPR001781; IPR003128; IPR032402;	Zinc finger, LIM-type; Villin headpiece; Putative adherens-junction anchoring domain;
F1S4V8	Uncharacterized protein	0.502609	Down	0.00161	CPNE1	Copine-1 OS=Homo sapiens GN=CPNE1 PE=1 SV=1	Copine-1 OS=Mus musculus GN=Cpne1 PE=1 SV=1	58.995	nucleus			protein binding; binding;				IPR010734; IPR000008; IPR002035;	Copine; C2 domain; von Willebrand factor, type A;
F1S4X9	Glutathione synthetase	1.65901	Up	0.0261	GSS			52.341	cytoplasm	sulfur compound metabolic process; peptide metabolic process; peptide biosynthetic process; cellular modified amino acid biosynthetic process; nitrogen compound metabolic process; biosynthetic process; cellular amide metabolic process; organonitrogen compound biosynthetic process; organic substance biosynthetic process; cellular metabolic process; cellular biosynthetic process; sulfur compound bi…		ATP binding; nucleoside phosphate binding; glutathione synthase activity; ligase activity; nucleoside binding; ion binding; nucleotide binding; acid-amino acid ligase activity; ligase activity, forming carbon-nitrogen bonds; organic cyclic compound binding; heterocyclic compound binding; ribonucleoside binding; carbohydrate derivative binding; catalytic activity; ribonucleotide binding; binding; …	K01920	gshB; glutathione synthase [EC:6.3.2.3]	ssc00480 Glutathione metabolism - Sus scrofa (pig); ssc00270 Cysteine and methionine metabolism - Sus scrofa (pig); ssc01100 Metabolic pathways - Sus scrofa (pig);	IPR016185; IPR014709; IPR014049; IPR014042; IPR004887;	Pre-ATP-grasp domain; Glutathione synthase domain; Glutathione synthase, N-terminal, eukaryotic; Glutathione synthase, alpha-helical, eukaryotic; Glutathione synthase, substrate-binding, eukaryotic;
F1S4Y0	Uncharacterized protein	0.556618	Down	0.00337	ACSS2	"Acetyl-coenzyme A synthetase, cytoplasmic OS=Homo sapiens GN=ACSS2 PE=1 SV=1"	"Acetyl-coenzyme A synthetase, cytoplasmic OS=Mus musculus GN=Acss2 PE=1 SV=2"	78.738	cytoplasm	acetyl-CoA biosynthetic process from acetate; cofactor biosynthetic process; single-organism process; biosynthetic process; cellular metabolic process; thioester biosynthetic process; sulfur compound biosynthetic process; organic substance metabolic process; acetyl-CoA biosynthetic process; metabolic process; monocarboxylic acid metabolic process; coenzyme biosynthetic process; cellular process; …		nucleoside phosphate binding; CoA-ligase activity; nucleoside binding; ion binding; ligase activity; ligase activity, forming carbon-sulfur bonds; nucleotide binding; organic cyclic compound binding; heterocyclic compound binding; acetate-CoA ligase activity; ribonucleoside binding; carbohydrate derivative binding; AMP binding; ribonucleotide binding; catalytic activity; binding; purine ribonucle…	K01895	ACSS; acetyl-CoA synthetase [EC:6.2.1.1]	ssc00620 Pyruvate metabolism - Sus scrofa (pig); ssc00010 Glycolysis / Gluconeogenesis - Sus scrofa (pig); ssc00640 Propanoate metabolism - Sus scrofa (pig); ssc01200 Carbon metabolism - Sus scrofa (pig); ssc01100 Metabolic pathways - Sus scrofa (pig);	IPR032387; IPR025110; IPR000873;	Acetyl-coenzyme A synthetase, N-terminal domain; AMP-binding enzyme C-terminal domain; AMP-dependent synthetase/ligase;
F1S4Y6	Uncharacterized protein	1.94067	Up	0.000286	DYNLRB1	Dynein light chain roadblock-type 1 OS=Homo sapiens GN=DYNLRB1 PE=1 SV=3	Dynein light chain roadblock-type 1 OS=Mus musculus GN=Dynlrb1 PE=1 SV=3	10.963	cytoplasm	single-organism cellular process; microtubule-based movement; movement of cell or subcellular component; single-organism process; cellular process; microtubule-based process;	intracellular organelle; intracellular non-membrane-bounded organelle; cytoskeletal part; intracellular organelle part; macromolecular complex; intracellular part; microtubule associated complex; dynein complex; cytoplasmic dynein complex; cell; organelle part; non-membrane-bounded organelle; organelle; cytoskeleton; catalytic complex; microtubule cytoskeleton; intracellular; cell part; protein c…		K10419			IPR004942;	Roadblock/LAMTOR2 domain;
F1S534	Uncharacterized protein	2.08645	Up	0.00149	DR1	Protein Dr1 OS=Homo sapiens GN=DR1 PE=1 SV=1	Protein Dr1 OS=Mus musculus GN=Dr1 PE=2 SV=1	19.429	cyto_nucl			protein binding; protein heterodimerization activity; binding; protein dimerization activity;				IPR009072; IPR003958;	Histone-fold; Transcription factor CBF/NF-Y/archaeal histone domain;
F1S537	Uncharacterized protein	1.70323	Up	0.000118	DNTTIP2	Deoxynucleotidyltransferase terminal-interacting protein 2 OS=Homo sapiens GN=DNTTIP2 PE=1 SV=2	Deoxynucleotidyltransferase terminal-interacting protein 2 OS=Mus musculus GN=Dnttip2 PE=1 SV=1	86.748	nucleus							IPR014810;	Fcf2 pre-rRNA processing;
F1S543	Calponin	0.48374	Down	0.00659	CNN3			36.329	cytoplasm	actomyosin structure organization; cellular component organization; single-organism organelle organization; actin cytoskeleton organization; organelle organization; actin filament-based process; single-organism cellular process; single-organism process; cytoskeleton organization; cellular process; cellular component organization or biogenesis;		actin binding; protein binding; cytoskeletal protein binding; binding;				IPR001715;	Calponin homology domain;
F1S557	Uncharacterized protein	0.64035	Down	0.024	---	Glycogen debranching enzyme OS=Homo sapiens GN=AGL PE=1 SV=3	Protein Agl OS=Mus musculus GN=Agl PE=4 SV=1	149.65	cyto_nucl	carbohydrate biosynthetic process; polysaccharide biosynthetic process; glucan metabolic process; single-organism process; biosynthetic process; energy reserve metabolic process; cellular metabolic process; cellular polysaccharide metabolic process; organic substance metabolic process; metabolic process; generation of precursor metabolites and energy; cellular carbohydrate metabolic process; poly…		4-alpha-glucanotransferase activity; transferase activity, transferring hexosyl groups; alpha-glucosidase activity; catalytic activity; hydrolase activity, acting on glycosyl bonds; amylo-alpha-1,6-glucosidase activity; glucosidase activity; hydrolase activity, hydrolyzing O-glycosyl compounds; transferase activity, transferring glycosyl groups; hydrolase activity; transferase activity; glycogen …				IPR032792; IPR032790; IPR008928; IPR032788; IPR017853; IPR029436; IPR013781;	Glycogen debranching enzyme, glucanotransferase domain; Glycogen debranching enzyme, C-terminal; Six-hairpin glycosidase-like; Glycogen debranching enzyme, central domain; Glycoside hydrolase superfamily; Eukaryotic glycogen debranching enzyme, N-terminal domain; Glycoside hydrolase, catalytic domain;
F1S569	Uncharacterized protein	0.606594	Down	0.0116	DPH5	Diphthine synthase OS=Homo sapiens GN=DPH5 PE=1 SV=2	Diphthine synthase OS=Mus musculus GN=Dph5 PE=2 SV=2	31.695	cytoplasm	cellular protein metabolic process; peptidyl-diphthamide biosynthetic process from peptidyl-histidine; biosynthetic process; primary metabolic process; cellular metabolic process; cellular biosynthetic process; organic substance metabolic process; peptidyl-amino acid modification; peptidyl-histidine modification; metabolic process; cellular macromolecule metabolic process; cellular protein modifi…		transferase activity, transferring one-carbon groups; S-adenosylmethionine-dependent methyltransferase activity; diphthine synthase activity; methyltransferase activity; catalytic activity; transferase activity;	K00586			IPR000878; IPR014777; IPR014776;	Tetrapyrrole methylase; Tetrapyrrole methylase, subdomain 1; Tetrapyrrole methylase, subdomain 2;
F1S590	Uncharacterized protein	0.606537	Down	0.00323	CARM1	Histone-arginine methyltransferase CARM1 OS=Homo sapiens GN=CARM1 PE=1 SV=3	Histone-arginine methyltransferase CARM1 OS=Mus musculus GN=Carm1 PE=1 SV=2	65.973	nucleus	cellular protein metabolic process; primary metabolic process; cellular metabolic process; methylation; organic substance metabolic process; metabolic process; protein alkylation; protein methylation; macromolecule methylation; cellular macromolecule metabolic process; cellular protein modification process; protein metabolic process; macromolecule metabolic process; protein modification process; …		transferase activity, transferring one-carbon groups; methyltransferase activity; catalytic activity; transferase activity;	K05931	CARM1; type I protein arginine methyltransferase [EC:2.1.1.319]	ssc01522 Endocrine resistance - Sus scrofa (pig);	IPR029063; IPR020989;	S-adenosyl-L-methionine-dependent methyltransferase; Histone-arginine methyltransferase CARM1, N-terminal;
F1S593	Uncharacterized protein	0.505237	Down	0.0024	DNM2	Dynamin-2 OS=Homo sapiens GN=DNM2 PE=1 SV=2	Dynamin-2 OS=Mus musculus GN=Dnm2 PE=2 SV=1	93.334	mitochondria			nucleoside phosphate binding; nucleoside binding; ion binding; hydrolase activity, acting on acid anhydrides; hydrolase activity; nucleotide binding; nucleoside-triphosphatase activity; organic cyclic compound binding; heterocyclic compound binding; ribonucleoside binding; carbohydrate derivative binding; pyrophosphatase activity; catalytic activity; ribonucleotide binding; binding; GTPase activi…	K01528	DNM; dynamin GTPase [EC:3.6.5.5]	ssc04961 Endocrine and other factor-regulated calcium reabsorption - Sus scrofa (pig); ssc04144 Endocytosis - Sus scrofa (pig); ssc04721 Synaptic vesicle cycle - Sus scrofa (pig); ssc04072 Phospholipase D signaling pathway - Sus scrofa (pig); ssc05100 Bacterial invasion of epithelial cells - Sus scrofa (pig);	IPR030381; IPR003130; IPR011993; IPR001401; IPR020850; IPR027417; IPR000375; IPR001849;	Dynamin-type guanine nucleotide-binding (G) domain; Dynamin GTPase effector; PH domain-like; Dynamin, GTPase domain; GTPase effector domain; P-loop containing nucleoside triphosphate hydrolase; Dynamin central domain; Pleckstrin homology domain;
F1S5B3	Uncharacterized protein	7.91578	Up	0.0249	---	Probable G-protein coupled receptor 125 OS=Homo sapiens GN=GPR125 PE=1 SV=2	Probable G-protein coupled receptor 125 OS=Mus musculus GN=Gpr125 PE=2 SV=3	49.116	plasma membrane	G-protein coupled receptor signaling pathway; regulation of cellular process; single organism signaling; cellular response to stimulus; signal transduction; regulation of biological process; cell communication; single-organism process; signaling; response to stimulus; cellular process; biological regulation;	intrinsic component of membrane; membrane; integral component of membrane; membrane part;	signaling receptor activity; molecular transducer activity; receptor activity; G-protein coupled receptor activity; transmembrane signaling receptor activity; signal transducer activity; transmembrane receptor activity;	K08462
F1S5F4	Uncharacterized protein	0.598869	Down	0.00185	---	Serine/threonine-protein kinase Nek7 OS=Homo sapiens GN=NEK7 PE=1 SV=1	Serine/threonine-protein kinase Nek7 OS=Mus musculus GN=Nek7 PE=2 SV=1	19.819	cytoplasm	phosphorylation; cellular protein metabolic process; primary metabolic process; cellular metabolic process; phosphate-containing compound metabolic process; organic substance metabolic process; metabolic process; protein phosphorylation; phosphorus metabolic process; cellular macromolecule metabolic process; cellular protein modification process; protein metabolic process; macromolecule metabolic…		ATP binding; nucleoside phosphate binding; phosphotransferase activity, alcohol group as acceptor; nucleoside binding; ion binding; protein kinase activity; nucleotide binding; organic cyclic compound binding; heterocyclic compound binding; ribonucleoside binding; carbohydrate derivative binding; kinase activity; catalytic activity; ribonucleotide binding; binding; purine ribonucleoside binding; …				IPR000719; IPR011009;	Protein kinase domain; Protein kinase-like domain;
F1S5F9	Uncharacterized protein	2.20085	Up	0.0375	BOD1L1	Biorientation of chromosomes in cell division protein 1-like 1 OS=Homo sapiens GN=BOD1L1 PE=1 SV=2	Protein Bod1l OS=Mus musculus GN=Bod1l PE=2 SV=1	319.13	nucleus
F1S5G4	Uncharacterized protein	1.64753	Up	0.00479	LYAR	Cell growth-regulating nucleolar protein OS=Homo sapiens GN=LYAR PE=1 SV=2	Cell growth-regulating nucleolar protein OS=Mus musculus GN=Lyar PE=1 SV=2	43.895	cyto_nucl				K15263			IPR014898;	Zinc finger, C2H2, LYAR-type;
F1S5H7	Uncharacterized protein	0.611495	Down	0.00682	NHLRC2	NHL repeat-containing protein 2 OS=Homo sapiens GN=NHLRC2 PE=1 SV=1	NHL repeat-containing protein 2 OS=Mus musculus GN=Nhlrc2 PE=2 SV=1	79.135	peroxisome			protein binding; binding;				IPR011042; IPR012336;	Six-bladed beta-propeller, TolB-like; Thioredoxin-like fold;
F1S5I0	Uncharacterized protein	0.490887	Down	0.000239	ZFP36L2	"Zinc finger protein 36, C3H1 type-like 2 OS=Homo sapiens GN=ZFP36L2 PE=1 SV=3"	"Zinc finger protein 36, C3H1 type-like 2 OS=Mus musculus GN=Zfp36l2 PE=1 SV=2"	51.136	nucleus			metal ion binding; cation binding; binding; ion binding;	K18753			IPR000571; IPR007635;	Zinc finger, CCCH-type; Tis11B-like protein, N-terminal;
F1S5J1	Uncharacterized protein	1.51458	Up	5.99e-05	LRPPRC	"Leucine-rich PPR motif-containing protein, mitochondrial OS=Homo sapiens GN=LRPPRC PE=1 SV=3"	"Leucine-rich PPR motif-containing protein, mitochondrial OS=Mus musculus GN=Lrpprc PE=1 SV=2"	158.7	mitochondria			protein binding; binding;	K17964			IPR011990; IPR033443;	Tetratricopeptide-like helical domain; Pentacotripeptide-repeat region of PROPR;
F1S5J5	Uncharacterized protein	0.385448	Down	7.36e-05	HABP2	Hyaluronan-binding protein 2 OS=Homo sapiens GN=HABP2 PE=1 SV=1	Hyaluronan-binding protein 2 OS=Mus musculus GN=Habp2 PE=2 SV=1	61.864	extracellular	proteolysis; metabolic process; macromolecule metabolic process; protein metabolic process; primary metabolic process; organic substance metabolic process;		serine-type endopeptidase activity; endopeptidase activity; peptidase activity; catalytic activity; serine hydrolase activity; binding; ion binding; serine-type peptidase activity; cation binding; metal ion binding; peptidase activity, acting on L-amino acid peptides; protein binding; hydrolase activity; calcium ion binding;	K08648			IPR009003; IPR000001; IPR001254; IPR001881; IPR013806; IPR000742;	Peptidase S1, PA clan; Kringle; Serine proteases, trypsin domain; EGF-like calcium-binding domain; Kringle-like fold; EGF-like domain;
F1S5M7	Uncharacterized protein	2.15742	Up	0.0047	SMNDC1	Survival of motor neuron-related-splicing factor 30 OS=Homo sapiens GN=SMNDC1 PE=1 SV=1	Survival of motor neuron-related-splicing factor 30 OS=Mus musculus GN=Smndc1 PE=2 SV=1	26.698	nucleus	RNA processing; cellular aromatic compound metabolic process; organic cyclic compound metabolic process; nitrogen compound metabolic process; primary metabolic process; cellular metabolic process; organic substance metabolic process; mRNA processing; RNA metabolic process; metabolic process; nucleic acid metabolic process; heterocycle metabolic process; nucleobase-containing compound metabolic pr…	organelle; intracellular membrane-bounded organelle; intracellular organelle; nucleus; cell part; intracellular; cytoplasm; intracellular part; membrane-bounded organelle; cell;	organic cyclic compound binding; heterocyclic compound binding; RNA binding; binding; nucleic acid binding;	K12839	SMNDC1; survival of motor neuron-related-splicing factor 30	ssc03040 Spliceosome - Sus scrofa (pig);	IPR002999; IPR010304;	Tudor domain; Survival motor neuron;
F1S5N0	Uncharacterized protein	0.545004	Down	0.00324	XPNPEP1	Xaa-Pro aminopeptidase 1 OS=Homo sapiens GN=XPNPEP1 PE=1 SV=3	"X-prolyl aminopeptidase (Aminopeptidase P) 1, soluble, isoform CRA_b OS=Mus musculus GN=Xpnpep1 PE=2 SV=1"	74.719	mitochondria			peptidase activity; exopeptidase activity; catalytic activity; metalloaminopeptidase activity; metalloexopeptidase activity; peptidase activity, acting on L-amino acid peptides; aminopeptidase activity; hydrolase activity; metallopeptidase activity;	K01262			IPR029149; IPR000994; IPR033740; IPR028980; IPR000587; IPR032416;	Creatinase/Aminopeptidase P/Spt16, N-terminal; Peptidase M24; Aminopeptidase P; Creatinase/Aminopeptidase P, N-terminal; Creatinase, N-terminal; Peptidase M24, C-terminal domain;
F1S5P2	Uncharacterized protein	0.662805	Down	0.00717	SLK	STE20-like serine/threonine-protein kinase OS=Homo sapiens GN=SLK PE=1 SV=1	STE20-like serine/threonine-protein kinase OS=Mus musculus GN=Slk PE=1 SV=2	139	nucleus	phosphorylation; cellular protein metabolic process; primary metabolic process; cellular metabolic process; phosphate-containing compound metabolic process; organic substance metabolic process; metabolic process; protein phosphorylation; phosphorus metabolic process; cellular macromolecule metabolic process; cellular protein modification process; protein metabolic process; macromolecule metabolic…		ATP binding; nucleoside phosphate binding; phosphotransferase activity, alcohol group as acceptor; nucleoside binding; ion binding; protein binding; protein kinase activity; nucleotide binding; organic cyclic compound binding; heterocyclic compound binding; ribonucleoside binding; carbohydrate derivative binding; kinase activity; catalytic activity; ribonucleotide binding; binding; purine ribonuc…	K08836	SLK; STE20-like kinase [EC:2.7.11.1]	ssc04114 Oocyte meiosis - Sus scrofa (pig);	IPR000719; IPR001943; IPR011009;	Protein kinase domain; UVR domain; Protein kinase-like domain;
F1S5P5	Uncharacterized protein	2.56283	Up	0.00726	TPX2	Targeting protein for Xklp2 OS=Homo sapiens GN=TPX2 PE=1 SV=2	Targeting protein for Xklp2 OS=Mus musculus GN=Tpx2 PE=1 SV=1	72.875	nucleus							IPR027329; IPR027330;	TPX2, C-terminal; TPX2 central domain;
F1S5Y7	Uncharacterized protein	2.13284	Up	0.0428	CLCC1	Chloride channel CLIC-like protein 1 OS=Homo sapiens GN=CLCC1 PE=1 SV=1	"Chloride channel CLIC-like 1, isoform CRA_a OS=Mus musculus GN=Clcc1 PE=4 SV=1"	62.778	plasma membrane
F1S5Z3	Uncharacterized protein	0.556108	Down	0.00144	SARS	"Serine--tRNA ligase, cytoplasmic OS=Homo sapiens GN=SARS PE=1 SV=3"	"Serine--tRNA ligase, cytoplasmic OS=Mus musculus GN=Sars PE=2 SV=3"	58.635	cytoplasm	peptide metabolic process; cellular aromatic compound metabolic process; cellular protein metabolic process; single-organism process; biosynthetic process; organonitrogen compound biosynthetic process; tRNA aminoacylation; cellular metabolic process; organic substance metabolic process; metabolic process; cellular amino acid metabolic process; heterocycle metabolic process; nucleobase-containing …	intracellular part; cell; cell part; intracellular; cytoplasm;	ligase activity, forming aminoacyl-tRNA and related compounds; ATP binding; serine-tRNA ligase activity; nucleoside phosphate binding; ligase activity, forming carbon-oxygen bonds; nucleoside binding; ion binding; ligase activity; nucleotide binding; organic cyclic compound binding; heterocyclic compound binding; ribonucleoside binding; carbohydrate derivative binding; ribonucleotide binding; cat…	K01875	SARS; seryl-tRNA synthetase [EC:6.1.1.11]	ssc00970 Aminoacyl-tRNA biosynthesis - Sus scrofa (pig);	IPR010978; IPR015866; IPR002314; IPR033729; IPR006195;	tRNA-binding arm; Serine-tRNA synthetase, type1, N-terminal; Aminoacyl-tRNA synthetase, class II (G/ P/ S/T); Serine-tRNA ligase catalytic core domain; Aminoacyl-tRNA synthetase, class II;
F1S605	Glutathione S-transferase	0.463618	Down	0.000244	GSTM3			27.42	cytoplasm	metabolic process;		glutathione transferase activity; transferase activity, transferring alkyl or aryl (other than methyl) groups; protein binding; catalytic activity; transferase activity; binding;	K00799	GST; glutathione S-transferase [EC:2.5.1.18]	ssc00982 Drug metabolism - cytochrome P450 - Sus scrofa (pig); ssc01524 Platinum drug resistance - Sus scrofa (pig); ssc05418 Fluid shear stress and atherosclerosis - Sus scrofa (pig); ssc00980 Metabolism of xenobiotics by cytochrome P450 - Sus scrofa (pig); ssc00480 Glutathione metabolism - Sus scrofa (pig); ssc05204 Chemical carcinogenesis - Sus scrofa (pig);	IPR004046; IPR010987; IPR004045; IPR012336;	Glutathione S-transferase, C-terminal; Glutathione S-transferase, C-terminal-like; Glutathione S-transferase, N-terminal; Thioredoxin-like fold;
F1S610	Adenosylhomocysteinase	0.598261	Down	0.00406	AHCYL1			55.053	cytoplasm	alpha-amino acid catabolic process; nucleoside metabolic process; purine nucleoside metabolic process; S-adenosylhomocysteine metabolic process; cellular aromatic compound metabolic process; single-organism process; purine-containing compound catabolic process; cellular metabolic process; organic substance metabolic process; ribonucleoside catabolic process; cellular nitrogen compound catabolic p…		organic cyclic compound binding; heterocyclic compound binding; adenosylhomocysteinase activity; hydrolase activity, acting on ether bonds; nucleoside phosphate binding; NAD binding; catalytic activity; binding; hydrolase activity; nucleotide binding; cofactor binding; trialkylsulfonium hydrolase activity; small molecule binding; coenzyme binding;	K01251	E3.3.1.1; adenosylhomocysteinase [EC:3.3.1.1]	ssc00270 Cysteine and methionine metabolism - Sus scrofa (pig); ssc01100 Metabolic pathways - Sus scrofa (pig);	IPR016040; IPR015878;	NAD(P)-binding domain; S-adenosyl-L-homocysteine hydrolase, NAD binding domain;
F1S663	Uncharacterized protein	3.30614	Up	7.19e-05	LAMC1	Laminin subunit gamma-1 OS=Homo sapiens GN=LAMC1 PE=1 SV=3	Laminin subunit gamma-1 OS=Mus musculus GN=Lamc1 PE=2 SV=1	177.13	extracellular			protein binding; binding;	K05635	LAMC1; laminin, gamma 1	ssc05146 Amoebiasis - Sus scrofa (pig); ssc05145 Toxoplasmosis - Sus scrofa (pig); ssc04151 PI3K-Akt signaling pathway - Sus scrofa (pig); ssc04510 Focal adhesion - Sus scrofa (pig); ssc05020 Prion diseases - Sus scrofa (pig); ssc05200 Pathways in cancer - Sus scrofa (pig); ssc04512 ECM-receptor interaction - Sus scrofa (pig); ssc05222 Small cell lung cancer - Sus scrofa (pig);	IPR000034; IPR002049; IPR000742; IPR008211; IPR008979;	Laminin IV; Laminin EGF domain; EGF-like domain; Laminin, N-terminal; Galactose-binding domain-like;
F1S682	Sulfhydryl oxidase	0.580116	Down	0.0181	QSOX1			81.477	extracellular	regulation of cellular process; homeostatic process; regulation of biological quality; metabolic process; regulation of biological process; oxidation-reduction process; single-organism metabolic process; cell redox homeostasis; single-organism cellular process; cellular homeostasis; single-organism process; cellular process; biological regulation;		oxidoreductase activity, acting on a sulfur group of donors; catalytic activity; thiol oxidase activity; oxidoreductase activity, acting on a sulfur group of donors, oxygen as acceptor; oxidoreductase activity;	K10758			IPR017905; IPR012336; IPR013766;	ERV/ALR sulfhydryl oxidase domain; Thioredoxin-like fold; Thioredoxin domain;
F1S684	Uncharacterized protein	1.77721	Up	0.00458	BCLAF1	Bcl-2-associated transcription factor 1 OS=Homo sapiens GN=BCLAF1 PE=1 SV=2	Bcl-2-associated transcription factor 1 OS=Mus musculus GN=Bclaf1 PE=1 SV=2	106.31	nucleus				K13087
F1S6D8	Uncharacterized protein	0.47352	Down	0.000313	---	UMP-CMP kinase OS=Homo sapiens GN=CMPK1 PE=1 SV=3	UMP-CMP kinase OS=Mus musculus GN=Cmpk1 PE=1 SV=1	19.854	cytoplasm	nucleotide biosynthetic process; cellular aromatic compound metabolic process; nucleotide metabolic process; single-organism process; biosynthetic process; pyrimidine nucleotide biosynthetic process; organonitrogen compound biosynthetic process; cellular metabolic process; phosphate-containing compound metabolic process; organic substance metabolic process; pyrimidine-containing compound biosynth…		ATP binding; nucleoside phosphate binding; nucleoside binding; ion binding; nucleobase-containing compound kinase activity; uridylate kinase activity; nucleotide binding; nucleotide kinase activity; phosphotransferase activity, phosphate group as acceptor; cytidylate kinase activity; organic cyclic compound binding; heterocyclic compound binding; ribonucleoside binding; carbohydrate derivative bi…				IPR027417;	P-loop containing nucleoside triphosphate hydrolase;
F1S6G4	Uncharacterized protein	1.7316	Up	0.000906	TXNDC12	Thioredoxin domain-containing protein 12 OS=Homo sapiens GN=TXNDC12 PE=1 SV=1	Thioredoxin domain-containing protein 12 OS=Mus musculus GN=Txndc12 PE=2 SV=1	19.873	extracellular	regulation of cellular process; homeostatic process; regulation of biological quality; regulation of biological process; cell redox homeostasis; single-organism cellular process; cellular homeostasis; single-organism process; cellular process; biological regulation;			K05360	TXNDC12; protein-disulfide reductase (glutathione) [EC:1.8.4.2]	ssc00480 Glutathione metabolism - Sus scrofa (pig);	IPR012336; IPR013766;	Thioredoxin-like fold; Thioredoxin domain;
F1S6H2	Uncharacterized protein	1.50327	Up	0.00238	ST3GAL4	" CMP-N-acetylneuraminate-beta-galactosamide-alpha-2, 3-sialyltransferase 4 OS=Homo sapiens GN=ST3GAL4 PE=2 SV=1"	" CMP-N-acetylneuraminate-beta-galactosamide-alpha-2, 3-sialyltransferase 4 OS=Mus musculus GN=St3gal4 PE=2 SV=1"	38.315	extracellular	protein glycosylation; macromolecule glycosylation; glycoprotein biosynthetic process; single-organism cellular process; cellular protein metabolic process; glycoprotein metabolic process; single-organism process; biosynthetic process; primary metabolic process; cellular metabolic process; organic substance biosynthetic process; cellular biosynthetic process; organic substance metabolic process; …	membrane; intracellular organelle; bounding membrane of organelle; organelle membrane; cytoplasm; intracellular organelle part; Golgi membrane; intrinsic component of membrane; endomembrane system; intracellular part; integral component of Golgi membrane; cell; intrinsic component of Golgi membrane; integral component of membrane; organelle part; organelle; intracellular membrane-bounded organell…	sialyltransferase activity; transferase activity, transferring glycosyl groups; catalytic activity; transferase activity;	K03494	SIAT4C; beta-galactoside alpha-2,3-sialyltransferase (sialyltransferase 4C) [EC:2.4.99.4]	ssc00601 Glycosphingolipid biosynthesis - lacto and neolacto series - Sus scrofa (pig); ssc01100 Metabolic pathways - Sus scrofa (pig);
F1S6K5	Uncharacterized protein	0.597949	Down	0.00338	APRT	Adenine phosphoribosyltransferase OS=Homo sapiens GN=APRT PE=1 SV=2	Adenine phosphoribosyltransferase OS=Mus musculus GN=Aprt PE=1 SV=2	19.588	cytoplasm	pigment biosynthetic process; adenine metabolic process; nucleoside metabolic process; cellular aromatic compound metabolic process; single-organism process; biosynthetic process; adenine biosynthetic process; organonitrogen compound biosynthetic process; cellular metabolic process; purine nucleobase salvage; organic substance metabolic process; metabolic process; heterocycle metabolic process; a…	intracellular part; cell; cell part; intracellular; cytoplasm;	adenine phosphoribosyltransferase activity; transferase activity, transferring pentosyl groups; transferase activity, transferring glycosyl groups; catalytic activity; transferase activity;	K00759	APRT; adenine phosphoribosyltransferase [EC:2.4.2.7]	ssc00230 Purine metabolism - Sus scrofa (pig); ssc01100 Metabolic pathways - Sus scrofa (pig);	IPR000836; IPR029057;	Phosphoribosyltransferase domain; Phosphoribosyltransferase-like;
F1S6P9	Uncharacterized protein	1.51794	Up	0.00679	GATAD2A	Transcriptional repressor p66-alpha OS=Homo sapiens GN=GATAD2A PE=1 SV=1	Transcriptional repressor p66 alpha OS=Mus musculus GN=Gatad2a PE=2 SV=1	67.793	nucleus	regulation of cellular process; regulation of gene expression; regulation of transcription, DNA-templated; regulation of cellular biosynthetic process; regulation of primary metabolic process; regulation of macromolecule metabolic process; regulation of nucleobase-containing compound metabolic process; regulation of macromolecule biosynthetic process; regulation of cellular metabolic process; reg…		organic cyclic compound binding; heterocyclic compound binding; DNA binding; transition metal ion binding; binding; nucleic acid binding transcription factor activity; ion binding; nucleic acid binding; cation binding; metal ion binding; zinc ion binding; sequence-specific DNA binding; transcription factor activity, sequence-specific DNA binding;				IPR013088; IPR032346; IPR000679;	Zinc finger, NHR/GATA-type; Transcriptional repressor p66, coiled-coil MBD2-interaction domain; Zinc finger, GATA-type;
F1S6R1	Uncharacterized protein	1.83242	Up	0.00318	CIRBP	Cold-inducible RNA-binding protein OS=Homo sapiens GN=CIRBP PE=1 SV=1	"Cold inducible RNA binding protein, isoform CRA_a OS=Mus musculus GN=Cirbp PE=4 SV=1"	18.607	nucleus			organic cyclic compound binding; heterocyclic compound binding; nucleoside phosphate binding; binding; nucleic acid binding; nucleotide binding; small molecule binding;	K13195			IPR000504; IPR012677; IPR003954; IPR034278;	RNA recognition motif domain; Nucleotide-binding alpha-beta plait domain; RNA recognition motif domain, eukaryote; RBM3/CIRBP, RNA recognition motif;
F1S6U8	Wee1-like protein kinase	0.618856	Down	0.00335	WEE1			71.487	nucleus	cellular component organization; mitotic cell cycle; phosphorylation; mitotic nuclear division; organelle fission; single-organism cellular process; cellular protein metabolic process; single-organism process; primary metabolic process; mitotic cell cycle process; cellular metabolic process; phosphate-containing compound metabolic process; organic substance metabolic process; metabolic process; p…	organelle; intracellular membrane-bounded organelle; intracellular organelle; nucleus; cell part; intracellular; intracellular part; membrane-bounded organelle; cell;	nucleoside phosphate binding; phosphotransferase activity, alcohol group as acceptor; protein tyrosine kinase activity; protein kinase activity; heterocyclic compound binding; organic cyclic compound binding; kinase activity; ribonucleotide binding; catalytic activity; binding; purine ribonucleoside binding; cation binding; anion binding; adenyl ribonucleotide binding; adenyl nucleotide binding; …	K06632	WEE1; wee1-like protein kinase [EC:2.7.11.1]	ssc04110 Cell cycle - Sus scrofa (pig);	IPR000719; IPR011009;	Protein kinase domain; Protein kinase-like domain;
F1S6V4	Uncharacterized protein	0.634348	Down	0.000401	EIF4G2	Eukaryotic translation initiation factor 4 gamma 2 OS=Homo sapiens GN=EIF4G2 PE=1 SV=1	Eukaryotic translation initiation factor 4 gamma 2 OS=Mus musculus GN=Eif4g2 PE=4 SV=1	105.6	peroxisome			organic cyclic compound binding; heterocyclic compound binding; RNA binding; protein binding; binding; nucleic acid binding;	K03260	EIF4G; translation initiation factor 4G	ssc03013 RNA transport - Sus scrofa (pig); ssc05416 Viral myocarditis - Sus scrofa (pig);	IPR003891; IPR003307; IPR016024; IPR003890; IPR016021;	Initiation factor eIF-4 gamma, MA3; W2 domain; Armadillo-type fold; MIF4G-like, type 3; MIF4G-like domain;
F1S6W7	Uncharacterized protein	0.56972	Down	0.000432	USP47	Ubiquitin carboxyl-terminal hydrolase 47 OS=Homo sapiens GN=USP47 PE=1 SV=3	Ubiquitin carboxyl-terminal hydrolase 47 OS=Mus musculus GN=Usp47 PE=1 SV=2	124.18	nucleus	modification-dependent macromolecule catabolic process; protein modification by small protein removal; cellular macromolecule catabolic process; proteolysis involved in cellular protein catabolic process; cellular protein catabolic process; modification-dependent protein catabolic process; cellular protein metabolic process; ubiquitin-dependent protein catabolic process; protein modification by s…		peptidase activity; thiol-dependent ubiquitinyl hydrolase activity; catalytic activity; binding; ubiquitin-like protein-specific protease activity; ubiquitinyl hydrolase activity; peptidase activity, acting on L-amino acid peptides; cysteine-type peptidase activity; hydrolase activity; protein binding;	K11857			IPR000626; IPR001394; IPR028889;	Ubiquitin domain; Peptidase C19, ubiquitin carboxyl-terminal hydrolase; Ubiquitin specific protease domain;
F1S6Y4	Uncharacterized protein	0.590835	Down	0.0101	RALGPS2	Ras-specific guanine nucleotide-releasing factor RalGPS2 OS=Homo sapiens GN=RALGPS2 PE=1 SV=1	Ras-specific guanine nucleotide-releasing factor RalGPS2 OS=Mus musculus GN=Ralgps2 PE=1 SV=2	39.13	nucleus							IPR011993; IPR023578; IPR001849;	PH domain-like; Ras guanine nucleotide exchange factor domain; Pleckstrin homology domain;
F1S765	Uncharacterized protein	2.37334	Up	0.000103	C1orf123	UPF0587 protein C1orf123 OS=Homo sapiens GN=C1orf123 PE=1 SV=1	UPF0587 protein C1orf123 homolog OS=Mus musculus PE=2 SV=1	18.13	extracellular
F1S788	Uncharacterized protein	0.324373	Down	3.24e-05	C8A	Complement component C8 alpha chain OS=Homo sapiens GN=C8A PE=1 SV=2	Complement component C8 alpha chain OS=Mus musculus GN=C8a PE=2 SV=1	63.324	mitochondria	immune system process; immune response; response to stimulus;	membrane; intrinsic component of plasma membrane; membrane protein complex; cell periphery; pore complex; plasma membrane protein complex; intrinsic component of membrane; macromolecular complex; integral component of plasma membrane; cell; integral component of membrane; plasma membrane; plasma membrane part; membrane part; cell part; membrane attack complex; protein complex;	protein binding; binding;	K03997	C8A; complement component 8 subunit alpha	ssc05146 Amoebiasis - Sus scrofa (pig); ssc05020 Prion diseases - Sus scrofa (pig); ssc04610 Complement and coagulation cascades - Sus scrofa (pig); ssc05322 Systemic lupus erythematosus - Sus scrofa (pig);	IPR020864; IPR009030;	Membrane attack complex component/perforin (MACPF) domain; Growth factor receptor cysteine-rich domain;
F1S790	Uncharacterized protein	0.257393	Down	0.000749	C8B	Complement component C8 beta chain OS=Homo sapiens GN=C8B PE=1 SV=3	Complement component C8 beta chain OS=Mus musculus GN=C8b PE=1 SV=1	68.906	extracellular	immune system process; immune response; response to stimulus;	membrane; intrinsic component of plasma membrane; membrane protein complex; cell periphery; pore complex; plasma membrane protein complex; intrinsic component of membrane; macromolecular complex; integral component of plasma membrane; cell; integral component of membrane; plasma membrane; plasma membrane part; membrane part; cell part; membrane attack complex; protein complex;	protein binding; binding;	K03998	C8B; complement component 8 subunit beta	ssc05146 Amoebiasis - Sus scrofa (pig); ssc05020 Prion diseases - Sus scrofa (pig); ssc04610 Complement and coagulation cascades - Sus scrofa (pig); ssc05322 Systemic lupus erythematosus - Sus scrofa (pig);	IPR020864;	Membrane attack complex component/perforin (MACPF) domain;
F1S7E0	Uncharacterized protein	1.93263	Up	0.0264	COPE	Coatomer subunit epsilon OS=Homo sapiens GN=COPE PE=1 SV=3	Coatomer subunit epsilon OS=Mus musculus GN=Cope PE=2 SV=3	34.537	cytoplasm	transport; Golgi vesicle transport; localization; retrograde vesicle-mediated transport, Golgi to ER; establishment of localization; vesicle-mediated transport;		protein binding; structural molecule activity; binding;	K17268			IPR011990;	Tetratricopeptide-like helical domain;
F1S7J6	Uncharacterized protein	2.93401	Up	3.09e-05	SAFB	Scaffold attachment factor B1 OS=Homo sapiens GN=SAFB PE=1 SV=4	Scaffold attachment factor B1 OS=Mus musculus GN=Safb PE=1 SV=2	103.27	nucleus			organic cyclic compound binding; heterocyclic compound binding; nucleoside phosphate binding; binding; nucleic acid binding; nucleotide binding; small molecule binding;				IPR003034; IPR000504; IPR012677;	SAP domain; RNA recognition motif domain; Nucleotide-binding alpha-beta plait domain;
F1S7K1	Uncharacterized protein	2.94444	Up	0.000198	UHRF1	E3 ubiquitin-protein ligase UHRF1 OS=Homo sapiens GN=UHRF1 PE=1 SV=1	E3 ubiquitin-protein ligase UHRF1 OS=Mus musculus GN=Uhrf1 PE=1 SV=2	91.228	nucleus			histone binding; transition metal ion binding; binding; ion binding; metal ion binding; cation binding; protein binding; zinc ion binding;	K10638			IPR015947; IPR001841; IPR001965; IPR014722; IPR003105; IPR013083; IPR029071; IPR000626; IPR011011; IPR019787; IPR021991;	PUA-like domain; Zinc finger, RING-type; Zinc finger, PHD-type; Ribosomal protein L2 domain 2; SRA-YDG; Zinc finger, RING/FYVE/PHD-type; Ubiquitin-related domain; Ubiquitin domain; Zinc finger, FYVE/PHD-type; Zinc finger, PHD-finger; UHRF1, tandem tudor domain;
F1S7K5	Uncharacterized protein	3.9771	Up	0.00152	LOC100526035	Hepatoma-derived growth factor-related protein 2 OS=Homo sapiens GN=HDGFRP2 PE=1 SV=1	Hepatoma-derived growth factor-related protein 2 OS=Mus musculus GN=Hdgfrp2 PE=1 SV=1	73.845	nucleus		organelle; intracellular membrane-bounded organelle; intracellular organelle; nucleus; cell part; intracellular; intracellular part; membrane-bounded organelle; cell;					IPR017923; IPR000313;	Transcription factor IIS, N-terminal; PWWP domain;
F1S7L6	Uncharacterized protein	0.594182	Down	0.00667	UBXN6	UBX domain-containing protein 6 OS=Homo sapiens GN=UBXN6 PE=1 SV=1	UBX domain-containing protein 6 OS=Mus musculus GN=Ubxn6 PE=1 SV=1	49.846	cytoplasm			protein binding; binding;	K14011	UBXN6; UBX domain-containing protein 6	ssc04141 Protein processing in endoplasmic reticulum - Sus scrofa (pig);	IPR001012; IPR029071; IPR018997;	UBX domain; Ubiquitin-related domain; PUB domain;
F1S7L7	Uncharacterized protein	2.61547	Up	0.00733	CHAF1A	Chromatin assembly factor 1 subunit A OS=Homo sapiens GN=CHAF1A PE=1 SV=2	Chromatin assembly factor 1 subunit A OS=Mus musculus GN=Chaf1a PE=1 SV=1	106.86	nucleus				K10750			IPR029091; IPR029105;	Chromatin assembly factor 1 subunit A, N-terminal; Chromatin assembly factor 1 subunit A, C-terminal;
F1S7T1	Uncharacterized protein	1.90585	Up	0.0163	PRRC2C	Protein PRRC2C OS=Homo sapiens GN=PRRC2C PE=1 SV=4	Protein PRRC2C OS=Mus musculus GN=Prrc2c PE=1 SV=3	317.04	nucleus							IPR009738;	BAT2, N-terminal;
F1S7X0	Uncharacterized protein	0.54231	Down	4.06e-05	---	Nesprin-1 OS=Homo sapiens GN=SYNE1 PE=1 SV=4	Nesprin-1 OS=Mus musculus GN=Syne1 PE=1 SV=2	250.92	cytoplasm		intrinsic component of membrane; membrane; integral component of membrane; membrane part;	protein binding; binding;				IPR012315;	KASH domain;
F1S7X1	Uncharacterized protein	0.529026	Down	0.000314	---	Nesprin-1 OS=Homo sapiens GN=SYNE1 PE=1 SV=4	Nesprin-1 OS=Mus musculus GN=Syne1 PE=1 SV=2	343.14	nucleus			protein binding; binding;	K19326			IPR001715;	Calponin homology domain;
F1S827	Uncharacterized protein	3.30058	Up	0.00337	SERBP1	Plasminogen activator inhibitor 1 RNA-binding protein OS=Homo sapiens GN=SERBP1 PE=1 SV=2	Plasminogen activator inhibitor 1 RNA-binding protein OS=Mus musculus GN=Serbp1 PE=1 SV=2	44.835	nucleus				K13199			IPR006861; IPR032381;	Hyaluronan/mRNA-binding protein; Intracellular hyaluronan-binding protein 4, N-terminal domain;
F1S833	Uncharacterized protein	0.625296	Down	0.000127	LRRC40	Leucine-rich repeat-containing protein 40 OS=Homo sapiens GN=LRRC40 PE=1 SV=1	Leucine-rich repeat-containing protein 40 OS=Mus musculus GN=Lrrc40 PE=2 SV=2	68.568	cytoplasm			protein binding; binding;				IPR032675;	Leucine-rich repeat domain, L domain-like;
F1S870	Uncharacterized protein	0.46333	Down	0.00144	PSMF1	Proteasome inhibitor PI31 subunit OS=Homo sapiens GN=PSMF1 PE=1 SV=2	Proteasome inhibitor PI31 subunit OS=Mus musculus GN=Psmf1 PE=2 SV=1	29.56	extracellular				K06700	PSMF1; proteasome inhibitor subunit 1 (PI31)	ssc03050 Proteasome - Sus scrofa (pig);	IPR021625; IPR013886;	PI31 proteasome regulator, N-terminal; PI31 proteasome regulator, C-terminal;
F1S880	Uncharacterized protein	1.99927	Up	0.000515	NSFL1C	NSFL1 cofactor p47 OS=Homo sapiens GN=NSFL1C PE=1 SV=2	NSFL1 cofactor p47 OS=Mus musculus GN=Nsfl1c PE=1 SV=1	40.57	nucleus			protein binding; binding;	K14012	SHP1; UBX domain-containing protein 1	ssc04141 Protein processing in endoplasmic reticulum - Sus scrofa (pig);	IPR029071; IPR001012; IPR012989; IPR009060;	Ubiquitin-related domain; UBX domain; SEP domain; UBA-like;
F1S8A5	Uncharacterized protein	1.93658	Up	0.00239	MRPS26	"28S ribosomal protein S26, mitochondrial OS=Homo sapiens GN=MRPS26 PE=1 SV=1"	"28S ribosomal protein S26, mitochondrial OS=Mus musculus GN=Mrps26 PE=1 SV=1"	23.597	mitochondria		intracellular organelle; ribosome; mitochondrial matrix; organellar small ribosomal subunit; mitochondrial part; intracellular non-membrane-bounded organelle; small ribosomal subunit; cytoplasm; intracellular organelle part; macromolecular complex; intracellular part; mitochondrial ribosome; cell; organellar ribosome; organelle part; mitochondrion; non-membrane-bounded organelle; organelle; intra…		K17405
F1S8F9	Poly [ADP-ribose] polymerase	1.90457	Up	0.00519	PARP2			64.321	nucleus	protein glycosylation; macromolecule glycosylation; glycoprotein biosynthetic process; single-organism cellular process; cellular protein metabolic process; glycoprotein metabolic process; single-organism process; biosynthetic process; primary metabolic process; cellular metabolic process; organic substance biosynthetic process; cellular biosynthetic process; organic substance metabolic process; …		transferase activity, transferring pentosyl groups; transferase activity, transferring glycosyl groups; NAD+ ADP-ribosyltransferase activity; catalytic activity; transferase activity;	K10798	PARP; poly [ADP-ribose] polymerase [EC:2.4.2.30]	ssc03410 Base excision repair - Sus scrofa (pig); ssc04210 Apoptosis - Sus scrofa (pig);	IPR008893; IPR004102; IPR012317;	WGR domain; Poly(ADP-ribose) polymerase, regulatory domain; Poly(ADP-ribose) polymerase, catalytic domain;
F1S8G5	Thimet oligopeptidase	1.68685	Up	0.00543	THOP1			78.078	cytoplasm	proteolysis; metabolic process; macromolecule metabolic process; protein metabolic process; primary metabolic process; organic substance metabolic process;		endopeptidase activity; metalloendopeptidase activity; peptidase activity; catalytic activity; peptidase activity, acting on L-amino acid peptides; hydrolase activity; metallopeptidase activity;	K01392	THOP1; thimet oligopeptidase [EC:3.4.24.15]	ssc04614 Renin-angiotensin system - Sus scrofa (pig); ssc05143 African trypanosomiasis - Sus scrofa (pig);	IPR024077; IPR001567; IPR024080; IPR024079;	Neurolysin/Thimet oligopeptidase, domain 2; Peptidase M3A/M3B catalytic domain; Neurolysin/Thimet oligopeptidase, N-terminal; Metallopeptidase, catalytic domain;
F1S8G6	Uncharacterized protein	0.636421	Down	0.00201	SGTA	Small glutamine-rich tetratricopeptide repeat-containing protein alpha OS=Homo sapiens GN=SGTA PE=1 SV=1	Small glutamine-rich tetratricopeptide repeat-containing protein alpha OS=Mus musculus GN=Sgta PE=1 SV=2	34.189	cyto_nucl			protein binding; binding;	K16365			IPR011990; IPR032374; IPR013026;	Tetratricopeptide-like helical domain; SGTA, homodimerisation domain; Tetratricopeptide repeat-containing domain;
F1S8H4	Uncharacterized protein	0.511728	Down	0.00406	OSGEP	Probable tRNA N6-adenosine threonylcarbamoyltransferase OS=Homo sapiens GN=OSGEP PE=1 SV=1	Probable tRNA N6-adenosine threonylcarbamoyltransferase OS=Mus musculus GN=Osgep PE=2 SV=2	36.631	cyto_nucl				K01409			IPR000905;	Gcp-like domain;
F1S8L9	Uncharacterized protein	0.633854	Down	0.00423	HNRNPU	Heterogeneous nuclear ribonucleoprotein U OS=Homo sapiens GN=HNRNPU PE=1 SV=6	Heterogeneous nuclear ribonucleoprotein U OS=Mus musculus GN=Hnrnpu PE=1 SV=1	86.837	nucleus			protein binding; binding;	K12888	HNRNPU; heterogeneous nuclear ribonucleoprotein U	ssc03040 Spliceosome - Sus scrofa (pig);	IPR003034; IPR001870; IPR027417; IPR013320; IPR003877;	SAP domain; B30.2/SPRY domain; P-loop containing nucleoside triphosphate hydrolase; Concanavalin A-like lectin/glucanase domain; SPRY domain;
F1S8M9	Uncharacterized protein	2.16941	Up	0.00168	LRPAP1	Alpha-2-macroglobulin receptor-associated protein OS=Homo sapiens GN=LRPAP1 PE=1 SV=1	Alpha-2-macroglobulin receptor-associated protein OS=Mus musculus GN=Lrpap1 PE=1 SV=1	41.638	extracellular		organelle; intracellular membrane-bounded organelle; intracellular organelle; endoplasmic reticulum; cell part; intracellular; cytoplasm; endomembrane system; intracellular part; membrane-bounded organelle; cell; cytoplasmic part;	lipoprotein particle receptor binding; carbohydrate derivative binding; receptor binding; binding; ion binding; protein binding; anion binding; glycosaminoglycan binding; heparin binding; sulfur compound binding; low-density lipoprotein particle receptor binding;				IPR010483; IPR009066;	Alpha-2-macroglobulin RAP, C-terminal; Alpha-2-macroglobulin receptor-associated protein, domain 1;
F1S8P8	Uncharacterized protein	1.73389	Up	0.00441	NOP14	Nucleolar protein 14 OS=Homo sapiens GN=NOP14 PE=1 SV=3	Nucleolar protein 14 OS=Mus musculus GN=Nop14 PE=1 SV=2	96.165	plasma membrane		cell part; intracellular; macromolecular complex; intracellular part; ribonucleoprotein complex; small-subunit processome; intracellular ribonucleoprotein complex; cell; preribosome;		K14766
F1S8S0	Uncharacterized protein	1.52003	Up	0.0199	WHSC1	Histone-lysine N-methyltransferase NSD2 OS=Homo sapiens GN=WHSC1 PE=1 SV=1	Histone-lysine N-methyltransferase NSD2 OS=Mus musculus GN=Whsc1 PE=1 SV=2	150.17	nucleus		organelle; intracellular membrane-bounded organelle; intracellular organelle; nucleus; cell part; intracellular; intracellular part; membrane-bounded organelle; cell;	S-adenosylmethionine-dependent methyltransferase activity; methyltransferase activity; ion binding; protein-lysine N-methyltransferase activity; lysine N-methyltransferase activity; transferase activity, transferring one-carbon groups; protein binding; zinc ion binding; histone-lysine N-methyltransferase activity; transition metal ion binding; protein methyltransferase activity; histone methyltra…	K11424	WHSC1; histone-lysine N-methyltransferase NSD2 [EC:2.1.1.43]	ssc00310 Lysine degradation - Sus scrofa (pig); ssc05202 Transcriptional misregulation in cancer - Sus scrofa (pig);	IPR001214; IPR001841; IPR001965; IPR003616; IPR009071; IPR013083; IPR011011; IPR000313; IPR006560; IPR019787;	SET domain; Zinc finger, RING-type; Zinc finger, PHD-type; Post-SET domain; High mobility group box domain; Zinc finger, RING/FYVE/PHD-type; Zinc finger, FYVE/PHD-type; PWWP domain; AWS domain; Zinc finger, PHD-finger;
F1S8T1	Uncharacterized protein	3.09734	Up	0.00251	NOLC1	Nucleolar and coiled-body phosphoprotein 1 OS=Homo sapiens GN=NOLC1 PE=1 SV=2	Protein Nolc1 OS=Mus musculus GN=Nolc1 PE=2 SV=1	74.092	nucleus			protein binding; binding;				IPR006594; IPR007718;	LIS1 homology motif; SRP40, C-terminal;
F1S8T6	Uncharacterized protein	0.540393	Down	0.000486	MGEA5	Bifunctional protein NCOAT OS=Homo sapiens GN=MGEA5 PE=1 SV=2	Bifunctional protein NCOAT OS=Mus musculus GN=Mgea5 PE=1 SV=2	103	cytoplasm				K15719	NCOAT; protein O-GlcNAcase / histone acetyltransferase [EC:3.2.1.169 2.3.1.48]	ssc04931 Insulin resistance - Sus scrofa (pig);	IPR017853; IPR016181;	Glycoside hydrolase superfamily; Acyl-CoA N-acyltransferase;
F1S8T7	Uncharacterized protein	1.57948	Up	0.00669	NPM3	Nucleoplasmin-3 OS=Homo sapiens GN=NPM3 PE=1 SV=3	Nucleoplasmin-3 OS=Mus musculus GN=Npm3 PE=2 SV=3	19.11	extracellular				K11278			IPR024057;	Nucleoplasmin core domain;
F1S8Y5	Phosphoglycerate mutase	1.63837	Up	0.0115	PGAM1			29.301	cytoplasm	ATP generation from ADP; nucleoside metabolic process; purine nucleoside metabolic process; nucleoside diphosphate phosphorylation; ADP metabolic process; pyridine nucleotide metabolic process; glycolytic process; purine ribonucleoside monophosphate metabolic process; nucleotide metabolic process; single-organism process; ribonucleoside diphosphate metabolic process; nucleotide phosphorylation; p…		phosphoglycerate mutase activity; isomerase activity; catalytic activity; intramolecular transferase activity; intramolecular transferase activity, phosphotransferases;	K01834	PGAM; 2,3-bisphosphoglycerate-dependent phosphoglycerate mutase [EC:5.4.2.11]	ssc05230 Central carbon metabolism in cancer - Sus scrofa (pig); ssc04922 Glucagon signaling pathway - Sus scrofa (pig); ssc00010 Glycolysis / Gluconeogenesis - Sus scrofa (pig); ssc00260 Glycine, serine and threonine metabolism - Sus scrofa (pig); ssc01200 Carbon metabolism - Sus scrofa (pig); ssc01230 Biosynthesis of amino acids - Sus scrofa (pig); ssc01100 Metabolic pathways - Sus scrofa (pig);
F1S8Z3	Uncharacterized protein	0.611782	Down	0.000805	VWA5A	von Willebrand factor A domain-containing protein 5A OS=Homo sapiens GN=VWA5A PE=2 SV=2	von Willebrand factor A domain-containing protein 5A OS=Mus musculus GN=Vwa5a PE=1 SV=2	87.292	cytoplasm							IPR013694; IPR002035;	VIT domain; von Willebrand factor, type A;
F1S924	Uncharacterized protein	3.72362	Up	0.00882	CCDC124	Coiled-coil domain-containing protein 124 OS=Homo sapiens GN=CCDC124 PE=1 SV=1	Coiled-coil domain-containing protein 124 OS=Mus musculus GN=Ccdc124 PE=2 SV=1	25.887	nucleus							IPR009071;	High mobility group box domain;
F1S935	Uncharacterized protein	0.576126	Down	0.00559	RPL18A	60S ribosomal protein L18a OS=Homo sapiens GN=RPL18A PE=1 SV=2	60S ribosomal protein L18a OS=Mus musculus GN=Rpl18a PE=2 SV=1	26.047	nucleus	peptide metabolic process; peptide biosynthetic process; cellular protein metabolic process; nitrogen compound metabolic process; biosynthetic process; cellular amide metabolic process; primary metabolic process; organonitrogen compound biosynthetic process; organic substance biosynthetic process; cellular metabolic process; cellular biosynthetic process; organic substance metabolic process; meta…	ribosome; organelle; intracellular organelle; intracellular non-membrane-bounded organelle; cell part; intracellular; cytoplasm; macromolecular complex; intracellular part; ribonucleoprotein complex; cell; intracellular ribonucleoprotein complex; cytoplasmic part; non-membrane-bounded organelle;	structural constituent of ribosome; structural molecule activity;	K02882	RP-L18Ae; large subunit ribosomal protein L18Ae	ssc03010 Ribosome - Sus scrofa (pig);	IPR023573;	Ribosomal protein 50S-L18Ae/60S-L20/60S-L18A;
F1S937	Hexosyltransferase	2.61409	Up	0.0239	B3GNT3			42.764	extracellular	protein glycosylation; macromolecule glycosylation; glycoprotein biosynthetic process; single-organism cellular process; cellular protein metabolic process; glycoprotein metabolic process; single-organism process; biosynthetic process; primary metabolic process; cellular metabolic process; organic substance biosynthetic process; cellular biosynthetic process; organic substance metabolic process; …	membrane;	transferase activity, transferring glycosyl groups; transferase activity, transferring hexosyl groups; catalytic activity; transferase activity; galactosyltransferase activity;	K07970	B3GNT3; beta-1,3-N-acetylglucosaminyltransferase 3 [EC:2.4.1.146 2.4.1.149]	ssc00601 Glycosphingolipid biosynthesis - lacto and neolacto series - Sus scrofa (pig); ssc01100 Metabolic pathways - Sus scrofa (pig);
F1S994	Uncharacterized protein	3.6633	Up	5.29e-05	C11orf58	Small acidic protein OS=Homo sapiens GN=SMAP PE=1 SV=1	Small acidic protein OS=Mus musculus GN=Smap PE=1 SV=1	20.162	nucleus							IPR028124;	Small acidic protein-like domain;
F1S995	Uncharacterized protein	3.20644	Up	0.00756	PLEKHA7	Pleckstrin homology domain-containing family A member 7 OS=Homo sapiens GN=PLEKHA7 PE=1 SV=2	Pleckstrin homology domain-containing family A member 7 OS=Mus musculus GN=Plekha7 PE=1 SV=2	121.4	nucleus			protein binding; binding;				IPR011993; IPR001202; IPR001849;	PH domain-like; WW domain; Pleckstrin homology domain;
F1S9A4	Uncharacterized protein	1.55766	Up	0.00585	NUCB2	Nucleobindin-2 OS=Homo sapiens GN=NUCB2 PE=1 SV=2	Nucleobindin-2 OS=Mus musculus GN=Nucb2 PE=1 SV=2	50.022	mitochondria			cation binding; metal ion binding; calcium ion binding; binding; ion binding;	K20371			IPR011992; IPR002048;	EF-hand domain pair; EF-hand domain;
F1S9B6	Uncharacterized protein	1.59254	Up	0.000887	OXA1L	Mitochondrial inner membrane protein OXA1L OS=Homo sapiens GN=OXA1L PE=1 SV=3	Mitochondrial inner membrane protein OXA1L OS=Mus musculus GN=Oxa1l PE=2 SV=1	55.202	plasma membrane	cellular component organization; protein localization to membrane; single-organism cellular process; single-organism process; single-organism membrane organization; cellular localization; establishment of localization; establishment of protein localization; cellular macromolecule localization; membrane organization; cellular protein localization; protein localization; macromolecule localization; …	intrinsic component of membrane; membrane; integral component of membrane; membrane part;		K03217	yidC; YidC/Oxa1 family membrane protein insertase	ssc03060 Protein export - Sus scrofa (pig);	IPR028055;	Membrane insertase YidC/Oxa1, C-terminal;
F1S9H9	Uncharacterized protein	0.487429	Down	0.00622	---	Low molecular weight phosphotyrosine protein phosphatase OS=Homo sapiens GN=ACP1 PE=1 SV=3	Low molecular weight phosphotyrosine protein phosphatase OS=Mus musculus GN=Acp1 PE=1 SV=3	16.875	cytoplasm	cellular protein metabolic process; primary metabolic process; protein dephosphorylation; dephosphorylation; cellular metabolic process; phosphate-containing compound metabolic process; organic substance metabolic process; metabolic process; phosphorus metabolic process; cellular macromolecule metabolic process; cellular protein modification process; protein metabolic process; macromolecule metab…	intracellular part; cell; cell part; intracellular; cytoplasm;	non-membrane spanning protein tyrosine phosphatase activity; hydrolase activity; phosphoprotein phosphatase activity; acid phosphatase activity; catalytic activity; phosphoric ester hydrolase activity; protein tyrosine phosphatase activity; phosphatase activity; hydrolase activity, acting on ester bonds;	K14394	ACP1; low molecular weight phosphotyrosine protein phosphatase [EC:3.1.3.2 3.1.3.48]	ssc00740 Riboflavin metabolism - Sus scrofa (pig); ssc00730 Thiamine metabolism - Sus scrofa (pig); ssc01100 Metabolic pathways - Sus scrofa (pig);	IPR023485;	Phosphotyrosine protein phosphatase I superfamily;
F1S9K5	Uncharacterized protein	0.643609	Down	0.000163	EPRS	Bifunctional glutamate/proline--tRNA ligase OS=Homo sapiens GN=EPRS PE=1 SV=5	Bifunctional glutamate/proline--tRNA ligase OS=Mus musculus GN=Eprs PE=1 SV=4	170.14	cytoplasm	peptide metabolic process; cellular aromatic compound metabolic process; cellular protein metabolic process; single-organism process; biosynthetic process; organonitrogen compound biosynthetic process; tRNA aminoacylation; cellular metabolic process; organic substance metabolic process; metabolic process; cellular amino acid metabolic process; heterocycle metabolic process; nucleobase-containing …	intracellular part; cell; cell part; intracellular; cytoplasm;	ligase activity, forming aminoacyl-tRNA and related compounds; ATP binding; nucleoside phosphate binding; ligase activity, forming carbon-oxygen bonds; glutamate-tRNA ligase activity; nucleoside binding; ion binding; ligase activity; nucleotide binding; proline-tRNA ligase activity; organic cyclic compound binding; heterocyclic compound binding; ribonucleoside binding; carbohydrate derivative bin…	K14163	EPRS; bifunctional glutamyl/prolyl-tRNA synthetase [EC:6.1.1.17 6.1.1.15]	ssc00970 Aminoacyl-tRNA biosynthesis - Sus scrofa (pig); ssc00860 Porphyrin and chlorophyll metabolism - Sus scrofa (pig); ssc01100 Metabolic pathways - Sus scrofa (pig);	IPR002314; IPR020056; IPR000738; IPR006195; IPR004154; IPR009068; IPR017449; IPR020059; IPR016061; IPR020061; IPR004046; IPR020058; IPR011035; IPR014729; IPR033721; IPR010987;	Aminoacyl-tRNA synthetase, class II (G/ P/ S/T); Ribosomal protein L25/Gln-tRNA synthetase, beta-barrel domain; WHEP-TRS domain; Aminoacyl-tRNA synthetase, class II; Anticodon-binding; S15/NS1, RNA-binding; Prolyl-tRNA synthetase, class II; Glutamyl/glutaminyl-tRNA synthetase, class Ib, anti-codon binding domain; Proline-tRNA ligase, class II, C-terminal; Glutamyl/glutaminyl-tRNA synthetase, clas…
F1S9R6	Uncharacterized protein	1.87249	Up	0.0237	---	Sortilin-related receptor OS=Homo sapiens GN=SORL1 PE=1 SV=2	Sortilin-related receptor OS=Mus musculus GN=Sorl1 PE=1 SV=3	116.95	cytoplasm			protein binding; binding;				IPR013783; IPR003961;	Immunoglobulin-like fold; Fibronectin type III;
F1S9S5	Uncharacterized protein	1.70105	Up	0.00233	FUBP1	Far upstream element-binding protein 1 OS=Homo sapiens GN=FUBP1 PE=1 SV=3	Far upstream element-binding protein 1 OS=Mus musculus GN=Fubp1 PE=1 SV=1	67.705	cytoplasm			organic cyclic compound binding; heterocyclic compound binding; RNA binding; binding; nucleic acid binding;	K13210			IPR004087; IPR004088; IPR015096;	K Homology domain; K Homology domain, type 1; Domain of unknown function DUF1897;
F1S9T3	Uncharacterized protein	0.572091	Down	0.0145	ADGRL4	"EGF, latrophilin and seven transmembrane domain-containing protein 1 OS=Homo sapiens GN=ELTD1 PE=1 SV=3"	"EGF, latrophilin seven transmembrane domain-containing protein 1 OS=Mus musculus GN=Eltd1 PE=2 SV=3"	82.841	plasma membrane	G-protein coupled receptor signaling pathway; regulation of cellular process; single organism signaling; cellular response to stimulus; signal transduction; regulation of biological process; cell communication; cell surface receptor signaling pathway; single-organism process; signaling; response to stimulus; cellular process; biological regulation;	intrinsic component of membrane; membrane; integral component of membrane; membrane part;	signaling receptor activity; molecular transducer activity; receptor activity; binding; ion binding; G-protein coupled receptor activity; cation binding; metal ion binding; protein binding; calcium ion binding; transmembrane signaling receptor activity; signal transducer activity; transmembrane receptor activity;	K04595			IPR017981; IPR001881; IPR000742; IPR000203; IPR032471;	GPCR, family 2-like; EGF-like calcium-binding domain; EGF-like domain; GPS motif; GAIN domain, N-terminal;
F1S9W8	Uncharacterized protein	0.658825	Down	0.0351	KLC1	Kinesin light chain 1 OS=Homo sapiens GN=KLC1 PE=1 SV=2	Kinesin light chain 1 OS=Mus musculus GN=Klc1 PE=1 SV=1	65.064	cytoplasm		intracellular organelle; intracellular non-membrane-bounded organelle; cytoskeletal part; intracellular organelle part; macromolecular complex; intracellular part; microtubule associated complex; cell; organelle part; kinesin complex; non-membrane-bounded organelle; organelle; cytoskeleton; microtubule cytoskeleton; intracellular; cell part; protein complex;	pyrophosphatase activity; motor activity; catalytic activity; binding; hydrolase activity, acting on acid anhydrides; protein binding; hydrolase activity; nucleoside-triphosphatase activity; hydrolase activity, acting on acid anhydrides, in phosphorus-containing anhydrides; microtubule motor activity;	K10407	KLC; kinesin light chain	ssc05132 Salmonella infection - Sus scrofa (pig);	IPR011990; IPR013026;	Tetratricopeptide-like helical domain; Tetratricopeptide repeat-containing domain;
F1S9Y5	Uncharacterized protein	0.508313	Down	1.65e-05	PPP2R5C	Serine/threonine-protein phosphatase 2A 56 kDa regulatory subunit gamma isoform OS=Homo sapiens GN=PPP2R5C PE=1 SV=3	Serine/threonine-protein phosphatase 2A 56 kDa regulatory subunit gamma isoform OS=Mus musculus GN=Ppp2r5c PE=1 SV=2	57.063	cytoplasm	regulation of cellular process; single organism signaling; cellular response to stimulus; signal transduction; regulation of biological process; cell communication; single-organism process; signaling; response to stimulus; cellular process; biological regulation;	catalytic complex; cell part; intracellular; protein serine/threonine phosphatase complex; macromolecular complex; intracellular part; cell; phosphatase complex; protein phosphatase type 2A complex;	molecular function regulator; enzyme regulator activity; protein phosphatase regulator activity; phosphatase regulator activity; binding;				IPR016024;	Armadillo-type fold;
F1S9Y6	Uncharacterized protein	0.551956	Down	0.00531	---	Cytoplasmic dynein 1 heavy chain 1 OS=Homo sapiens GN=DYNC1H1 PE=1 SV=5	Cytoplasmic dynein 1 heavy chain 1 OS=Mus musculus GN=Dync1h1 PE=1 SV=2	8.9871	cytoplasm
F1S9Y8	Uncharacterized protein	0.551295	Down	1.23e-05	---	Cytoplasmic dynein 1 heavy chain 1 OS=Homo sapiens GN=DYNC1H1 PE=1 SV=5	Cytoplasmic dynein 1 heavy chain 1 OS=Mus musculus GN=Dync1h1 PE=1 SV=2	162.72	cytoplasm				K10413	DYNC1H; dynein heavy chain 1, cytosolic	ssc05132 Salmonella infection - Sus scrofa (pig); ssc04962 Vasopressin-regulated water reabsorption - Sus scrofa (pig); ssc04145 Phagosome - Sus scrofa (pig);	IPR013602; IPR013594;	Dynein heavy chain, domain-2; Dynein heavy chain, domain-1;
F1SA25	Uncharacterized protein	1.92219	Up	0.00498	VTI1B	Vesicle transport through interaction with t-SNAREs homolog 1B OS=Homo sapiens GN=VTI1B PE=1 SV=3	Vesicle transport through interaction with t-SNAREs 1B homolog OS=Mus musculus GN=Vti1b PE=2 SV=1	26.685	peroxisome	establishment of protein localization; transport; intracellular transport; cellular macromolecule localization; establishment of localization in cell; vesicle-mediated transport; intracellular protein transport; organic substance transport; protein localization; macromolecule localization; cellular protein localization; localization; protein transport; establishment of localization; cellular loca…	membrane;	protein binding; binding;	K08493	VTI1; vesicle transport through interaction with t-SNAREs 1	ssc04130 SNARE interactions in vesicular transport - Sus scrofa (pig);	IPR007705; IPR000727; IPR010989;	Vesicle transport v-SNARE, N-terminal; Target SNARE coiled-coil homology domain; SNARE;
F1SA28	Uncharacterized protein	1.53542	Up	0.0104	ECSIT	"Evolutionarily conserved signaling intermediate in Toll pathway, mitochondrial OS=Homo sapiens GN=ECSIT PE=1 SV=1"	"Evolutionarily conserved signaling intermediate in Toll pathway, mitochondrial OS=Mus musculus GN=Ecsit PE=1 SV=2"	49.272	mitochondria				K04405	ECSIT; evolutionarily conserved signaling intermediate in Toll pathway	ssc04010 MAPK signaling pathway - Sus scrofa (pig);	IPR029342;	ECSIT, C-terminal domain;
F1SA60	Uncharacterized protein	1.58077	Up	0.000171	SPTB	"Spectrin beta chain, erythrocytic OS=Homo sapiens GN=SPTB PE=1 SV=5"	Spectrin beta 1 OS=Mus musculus GN=Sptb PE=2 SV=1	270.34	nucleus		intracellular organelle; cell cortex; intracellular non-membrane-bounded organelle; cytoskeletal part; cell periphery; intracellular organelle part; cytoplasm; cytoplasmic region; cortical cytoskeleton; intracellular part; cortical actin cytoskeleton; cell; actin cytoskeleton; organelle part; non-membrane-bounded organelle; cytoskeleton; organelle; cell cortex part; intracellular; cell part; spec…	cytoskeletal protein binding; structural constituent of cytoskeleton; binding; phospholipid binding; ion binding; actin binding; lipid binding; anion binding; protein binding; structural molecule activity;	K06115			IPR001605; IPR011993; IPR001715; IPR001849;	Pleckstrin homology domain, spectrin-type; PH domain-like; Calponin homology domain; Pleckstrin homology domain;
F1SA74	Uncharacterized protein	0.576032	Down	0.00335	MTHFD1	"C-1-tetrahydrofolate synthase, cytoplasmic OS=Homo sapiens GN=MTHFD1 PE=1 SV=3"	"C-1-tetrahydrofolate synthase, cytoplasmic OS=Mus musculus GN=Mthfd1 PE=1 SV=4"	100.92	cytoplasm	cofactor biosynthetic process; pteridine-containing compound biosynthetic process; cellular aromatic compound metabolic process; organic acid biosynthetic process; cellular modified amino acid biosynthetic process; single-organism process; biosynthetic process; organonitrogen compound biosynthetic process; cellular metabolic process; organic substance metabolic process; metabolic process; heteroc…		oxidoreductase activity, acting on the CH-NH group of donors; ATP binding; nucleoside phosphate binding; ligase activity; nucleoside binding; ion binding; methylenetetrahydrofolate dehydrogenase (NADP+) activity; nucleotide binding; oxidoreductase activity; ligase activity, forming carbon-nitrogen bonds; organic cyclic compound binding; heterocyclic compound binding; ribonucleoside binding; carbo…	K00288	MTHFD; methylenetetrahydrofolate dehydrogenase (NADP+) / methenyltetrahydrofolate cyclohydrolase / formyltetrahydrofolate synthetase [EC:1.5.1.5 3.5.4.9 6.3.4.3]	ssc00670 One carbon pool by folate - Sus scrofa (pig); ssc01100 Metabolic pathways - Sus scrofa (pig);	IPR020631; IPR027417; IPR016040; IPR020630;	Tetrahydrofolate dehydrogenase/cyclohydrolase, NAD(P)-binding domain; P-loop containing nucleoside triphosphate hydrolase; NAD(P)-binding domain; Tetrahydrofolate dehydrogenase/cyclohydrolase, catalytic domain;
F1SAB5	Uncharacterized protein	1.69621	Up	0.00785	UBFD1	Ubiquitin domain-containing protein UBFD1 OS=Homo sapiens GN=UBFD1 PE=1 SV=2	Ubiquitin domain-containing protein UBFD1 OS=Mus musculus GN=Ubfd1 PE=1 SV=2	39.456	cyto_nucl			protein binding; binding;				IPR029071; IPR000626;	Ubiquitin-related domain; Ubiquitin domain;
F1SAD9	Protein disulfide-isomerase	1.61355	Up	0.00132	PDIA4			72.908	extracellular	regulation of cellular process; homeostatic process; regulation of biological quality; regulation of biological process; cell redox homeostasis; single-organism cellular process; cellular homeostasis; single-organism process; cellular process; biological regulation;	endoplasmic reticulum lumen; intracellular organelle; endoplasmic reticulum; cytoplasm; intracellular organelle part; endomembrane system; intracellular part; cell; organelle part; organelle; intracellular membrane-bounded organelle; membrane-enclosed lumen; intracellular organelle lumen; endoplasmic reticulum part; cell part; intracellular; membrane-bounded organelle; cytoplasmic part; organelle…	intramolecular oxidoreductase activity, transposing S-S bonds; intramolecular oxidoreductase activity; isomerase activity; protein disulfide isomerase activity; catalytic activity;	K09582	PDIA4; protein disulfide-isomerase A4 [EC:5.3.4.1]	ssc04918 Thyroid hormone synthesis - Sus scrofa (pig); ssc04141 Protein processing in endoplasmic reticulum - Sus scrofa (pig);	IPR005788; IPR013766; IPR012336;	Disulphide isomerase; Thioredoxin domain; Thioredoxin-like fold;
F1SAK7	Uncharacterized protein	0.640277	Down	0.013	UBE4A	Ubiquitin conjugation factor E4 A OS=Homo sapiens GN=UBE4A PE=1 SV=2	Protein Ube4a OS=Mus musculus GN=Ube4a PE=4 SV=1	122.53	cytoplasm	modification-dependent macromolecule catabolic process; cellular macromolecule catabolic process; proteolysis involved in cellular protein catabolic process; cellular protein catabolic process; protein ubiquitination; modification-dependent protein catabolic process; cellular protein metabolic process; ubiquitin-dependent protein catabolic process; protein modification by small protein conjugatio…	catalytic complex; cell part; intracellular; macromolecular complex; intracellular part; transferase complex; ubiquitin ligase complex; cell;	ubiquitin-ubiquitin ligase activity; ubiquitin protein ligase activity; ubiquitin-like protein ligase activity; ubiquitin-like protein transferase activity; catalytic activity; transferase activity; ubiquitin-protein transferase activity;	K10596	UBE4A; ubiquitin conjugation factor E4 A [EC:2.3.2.27]	ssc04120 Ubiquitin mediated proteolysis - Sus scrofa (pig);	IPR019474; IPR003613; IPR013083;	Ubiquitin conjugation factor E4, core; U box domain; Zinc finger, RING/FYVE/PHD-type;
F1SAL9	Uncharacterized protein	0.666082	Down	0.000283	---	Trafficking protein particle complex subunit 8 OS=Homo sapiens GN=TRAPPC8 PE=1 SV=2	Protein Trappc8 OS=Mus musculus GN=Trappc8 PE=2 SV=1	36.601	cytoplasm				K20305
F1SAM3	Uncharacterized protein	1.57653	Up	0.00376	CDH2	Cadherin-2 OS=Homo sapiens GN=CDH2 PE=1 SV=4	Cadherin-2 OS=Mus musculus GN=Cdh2 PE=1 SV=2	98.337	nucleus	cell-cell adhesion; cell adhesion; biological adhesion; homophilic cell adhesion via plasma membrane adhesion molecules; cell-cell adhesion via plasma-membrane adhesion molecules;	membrane; cell; cell part; cell periphery; plasma membrane;	cation binding; metal ion binding; calcium ion binding; binding; ion binding;	K06736	CDH2; cadherin 2, type 1, N-cadherin	ssc05412 Arrhythmogenic right ventricular cardiomyopathy (ARVC) - Sus scrofa (pig); ssc04514 Cell adhesion molecules (CAMs) - Sus scrofa (pig);	IPR015919; IPR027397; IPR014868; IPR000233; IPR002126;	Cadherin-like; Catenin binding domain; Cadherin prodomain; Cadherin, cytoplasmic domain; Cadherin;
F1SAT9	Uncharacterized protein	0.501664	Down	0.0174	THBD	Thrombomodulin OS=Homo sapiens GN=THBD PE=1 SV=2	Thrombomodulin OS=Mus musculus GN=Thbd PE=1 SV=1	61.392	plasma membrane	regulation of biological quality; regulation of body fluid levels; regulation of blood coagulation; negative regulation of multicellular organismal process; regulation of response to external stimulus; negative regulation of response to stimulus; negative regulation of biological process; regulation of response to stress; negative regulation of wound healing; regulation of multicellular organisma…	membrane; intrinsic component of plasma membrane; plasma membrane part; membrane part; cell part; cell periphery; intrinsic component of membrane; integral component of plasma membrane; cell; integral component of membrane; plasma membrane;	signaling receptor activity; molecular transducer activity; receptor activity; binding; ion binding; metal ion binding; cation binding; protein binding; calcium ion binding; transmembrane signaling receptor activity; signal transducer activity; transmembrane receptor activity;	K03907	THBD; thrombomodulin	ssc05418 Fluid shear stress and atherosclerosis - Sus scrofa (pig); ssc04933 AGE-RAGE signaling pathway in diabetic complications - Sus scrofa (pig); ssc04610 Complement and coagulation cascades - Sus scrofa (pig);	IPR001304; IPR015149; IPR016187; IPR001881; IPR000742; IPR009030; IPR016186;	C-type lectin-like; Thrombomodulin-like, EGF-like; C-type lectin fold; EGF-like calcium-binding domain; EGF-like domain; Growth factor receptor cysteine-rich domain; C-type lectin-like/link domain;
F1SAY0	Uncharacterized protein (Fragment)	2.24785	Up	8.65e-06	PTGFRN	Prostaglandin F2 receptor negative regulator OS=Homo sapiens GN=PTGFRN PE=1 SV=2	Prostaglandin F2 receptor negative regulator OS=Mus musculus GN=Ptgfrn PE=1 SV=2	96.905	mitochondria			protein binding; binding;	K06729			IPR007110; IPR013783; IPR003599; IPR013106;	Immunoglobulin-like domain; Immunoglobulin-like fold; Immunoglobulin subtype; Immunoglobulin V-set domain;
F1SB02	Uncharacterized protein	2.94626	Up	0.0314	ARHGAP23	Rho GTPase-activating protein 23 OS=Homo sapiens GN=ARHGAP23 PE=1 SV=2	Rho GTPase-activating protein 23 OS=Mus musculus GN=Arhgap23 PE=2 SV=2	124.87	nucleus	regulation of cellular process; single organism signaling; cellular response to stimulus; signal transduction; regulation of biological process; cell communication; single-organism process; signaling; response to stimulus; cellular process; biological regulation;		protein binding; binding;	K20315			IPR011993; IPR001478; IPR008936; IPR000198; IPR001849;	PH domain-like; PDZ domain; Rho GTPase activation protein; Rho GTPase-activating protein domain; Pleckstrin homology domain;
F1SB38	Uncharacterized protein	0.571704	Down	0.00455	---	Pseudouridylate synthase 7 homolog OS=Homo sapiens GN=PUS7 PE=1 SV=2	Protein Pus7 OS=Mus musculus GN=Pus7 PE=2 SV=2	75.168	cyto_nucl	cellular aromatic compound metabolic process; pseudouridine synthesis; organic cyclic compound metabolic process; nitrogen compound metabolic process; primary metabolic process; RNA modification; cellular metabolic process; organic substance metabolic process; RNA metabolic process; metabolic process; nucleic acid metabolic process; heterocycle metabolic process; nucleobase-containing compound me…		organic cyclic compound binding; heterocyclic compound binding; RNA binding; isomerase activity; catalytic activity; binding; nucleic acid binding; intramolecular transferase activity; pseudouridine synthase activity;	K06176			IPR020103; IPR011760;	Pseudouridine synthase, catalytic domain; Pseudouridine synthase, TruD, insertion domain;
F1SB42	Uncharacterized protein	3.82839	Up	2.31e-06	EZR	Ezrin OS=Homo sapiens GN=EZR PE=1 SV=4	Ezrin OS=Mus musculus GN=Ezr PE=1 SV=3	42.268	nucleus		membrane; cytoskeleton; organelle; intracellular organelle; extrinsic component of membrane; intracellular non-membrane-bounded organelle; membrane part; cell part; intracellular; cytoplasm; intracellular part; cell; non-membrane-bounded organelle;	actin binding; protein binding; cytoskeletal protein binding; binding;	K08007	VIL2; villin 2 (ezrin)	ssc05205 Proteoglycans in cancer - Sus scrofa (pig); ssc04971 Gastric acid secretion - Sus scrofa (pig); ssc04810 Regulation of actin cytoskeleton - Sus scrofa (pig); ssc04530 Tight junction - Sus scrofa (pig); ssc04670 Leukocyte transendothelial migration - Sus scrofa (pig); ssc05206 MicroRNAs in cancer - Sus scrofa (pig);	IPR018980; IPR011993; IPR011259; IPR008954; IPR000299;	FERM, C-terminal PH-like domain; PH domain-like; Ezrin/radixin/moesin, C-terminal; Moesin tail domain; FERM domain;
F1SB44	Uncharacterized protein	0.627719	Down	0.00357	DYNLT1	Dynein light chain Tctex-type 1 OS=Homo sapiens GN=DYNLT1 PE=1 SV=1	Dynein light chain Tctex-type 1 OS=Mus musculus GN=Dynlt1 PE=1 SV=1	12.368	cytoskeleton				K10420
F1SB53	Uncharacterized protein	0.514517	Down	0.00937	PSMC2	26S protease regulatory subunit 7 OS=Homo sapiens GN=PSMC2 PE=1 SV=3	26S protease regulatory subunit 7 OS=Mus musculus GN=Psmc2 PE=2 SV=1	53.065	mitochondria	organic substance catabolic process; metabolic process; protein catabolic process; macromolecule catabolic process; macromolecule metabolic process; protein metabolic process; primary metabolic process; catabolic process; organic substance metabolic process;	intracellular part; cell; cell part; intracellular; cytoplasm;	ATP binding; nucleoside phosphate binding; nucleoside binding; ion binding; hydrolase activity; nucleotide binding; organic cyclic compound binding; heterocyclic compound binding; ribonucleoside binding; carbohydrate derivative binding; catalytic activity; ribonucleotide binding; binding; purine ribonucleoside binding; anion binding; purine ribonucleotide binding; adenyl ribonucleotide binding; a…	K03061	PSMC2; 26S proteasome regulatory subunit T1	ssc05169 Epstein-Barr virus infection - Sus scrofa (pig); ssc03050 Proteasome - Sus scrofa (pig);	IPR003959; IPR003593; IPR027417;	ATPase, AAA-type, core; AAA+ ATPase domain; P-loop containing nucleoside triphosphate hydrolase;
F1SB62	Uncharacterized protein	2.99443	Up	4.88e-05	ACAT2	"Acetyl-CoA acetyltransferase, cytosolic OS=Homo sapiens GN=ACAT2 PE=1 SV=2"	Acetyl-Coenzyme A acetyltransferase 3 OS=Mus musculus GN=Acat3 PE=2 SV=1	42.311	peroxisome	metabolic process;		transferase activity, transferring acyl groups; transferase activity, transferring acyl groups other than amino-acyl groups; catalytic activity; transferase activity;	K00626	E2.3.1.9; acetyl-CoA C-acetyltransferase [EC:2.3.1.9]	ssc00620 Pyruvate metabolism - Sus scrofa (pig); ssc00900 Terpenoid backbone biosynthesis - Sus scrofa (pig); ssc00630 Glyoxylate and dicarboxylate metabolism - Sus scrofa (pig); ssc00071 Fatty acid degradation - Sus scrofa (pig); ssc01212 Fatty acid metabolism - Sus scrofa (pig); ssc00650 Butanoate metabolism - Sus scrofa (pig); ssc00310 Lysine degradation - Sus scrofa (pig); ssc00280 Valine, le…	IPR016039; IPR020616; IPR020617;	Thiolase-like; Thiolase, N-terminal; Thiolase, C-terminal;
F1SB81	Plasminogen	0.159731	Down	7.81e-05	PLG			90.677	extracellular	proteolysis; metabolic process; macromolecule metabolic process; protein metabolic process; primary metabolic process; organic substance metabolic process;		serine-type endopeptidase activity; endopeptidase activity; peptidase activity; catalytic activity; serine hydrolase activity; serine-type peptidase activity; peptidase activity, acting on L-amino acid peptides; hydrolase activity;	K01315	PLG; plasminogen [EC:3.4.21.7]	ssc05150 Staphylococcus aureus infection - Sus scrofa (pig); ssc05164 Influenza A - Sus scrofa (pig); ssc04080 Neuroactive ligand-receptor interaction - Sus scrofa (pig); ssc04610 Complement and coagulation cascades - Sus scrofa (pig);	IPR009003; IPR003609; IPR000001; IPR001254; IPR013806;	Peptidase S1, PA clan; PAN/Apple domain; Kringle; Serine proteases, trypsin domain; Kringle-like fold;
F1SBA3	Uncharacterized protein	0.51428	Down	0.00346	KCTD1	BTB/POZ domain-containing protein KCTD1 OS=Homo sapiens GN=KCTD1 PE=1 SV=1	BTB/POZ domain-containing protein KCTD1 OS=Mus musculus GN=Kctd1 PE=2 SV=1	30.29	cyto_nucl	cellular component biogenesis; cellular component organization; protein complex subunit organization; protein homooligomerization; cellular component assembly; macromolecular complex assembly; protein complex biogenesis; cellular process; protein complex assembly; cellular component organization or biogenesis; protein oligomerization; macromolecular complex subunit organization;		protein binding; binding;				IPR003131; IPR011333; IPR000210;	Potassium channel tetramerisation-type BTB domain; SKP1/BTB/POZ domain; BTB/POZ domain;
F1SBB7	Uncharacterized protein	0.532293	Down	0.0335	CABLES1	CDK5 and ABL1 enzyme substrate 1 OS=Homo sapiens GN=CABLES1 PE=1 SV=2	CDK5 and ABL1 enzyme substrate 1 OS=Mus musculus GN=Cables1 PE=2 SV=1	63.604	nucleus							IPR013763; IPR006671;	Cyclin-like; Cyclin, N-terminal;
F1SBE1	Uncharacterized protein	0.647516	Down	0.0385	CEBPB	CCAAT/enhancer-binding protein beta OS=Homo sapiens GN=CEBPB PE=1 SV=2	CCAAT/enhancer-binding protein beta OS=Mus musculus GN=Cebpb PE=1 SV=1	36.253	nucleus	regulation of cellular process; regulation of gene expression; regulation of transcription, DNA-templated; regulation of cellular biosynthetic process; regulation of primary metabolic process; regulation of macromolecule metabolic process; regulation of nucleobase-containing compound metabolic process; regulation of macromolecule biosynthetic process; regulation of cellular metabolic process; reg…		organic cyclic compound binding; heterocyclic compound binding; DNA binding; binding; nucleic acid binding transcription factor activity; nucleic acid binding; sequence-specific DNA binding; transcription factor activity, sequence-specific DNA binding;	K10048	CEBPB; CCAAT/enhancer binding protein (C/EBP), beta	ssc05152 Tuberculosis - Sus scrofa (pig); ssc04668 TNF signaling pathway - Sus scrofa (pig); ssc05202 Transcriptional misregulation in cancer - Sus scrofa (pig); ssc04657 IL-17 signaling pathway - Sus scrofa (pig);	IPR004827;	Basic-leucine zipper domain;
F1SBI1	Sorting nexin	0.622029	Down	0.0296	SNX5			47.822	cytoplasm			lipid binding; anion binding; binding; phosphatidylinositol binding; phospholipid binding; ion binding;	K17920	SNX5_6_32; sorting nexin-5/6/32	ssc04144 Endocytosis - Sus scrofa (pig);	IPR015404; IPR001683;	Sorting nexin Vps5-like, C-terminal; Phox homologous domain;
F1SBQ5	"Solute carrier family 16, member 1 (Monocarboxylic acid transporter 1) tv1"	3.15159	Up	0.0318	SLC16A1			54.247	plasma membrane	anion transport; transport; transmembrane transport; organic anion transport; single-organism localization; monocarboxylic acid transport; ion transport; single-organism process; organic substance transport; carboxylic acid transport; localization; organic acid transport; single-organism transport; establishment of localization;	intrinsic component of membrane; membrane; integral component of membrane; membrane part;	organic acid transmembrane transporter activity; ion transmembrane transporter activity; substrate-specific transporter activity; monocarboxylic acid transmembrane transporter activity; organic anion transmembrane transporter activity; carboxylic acid transmembrane transporter activity; substrate-specific transmembrane transporter activity; transmembrane transporter activity; anion transmembrane …	K08179			IPR020846;	Major facilitator superfamily domain;
F1SBR6	Olfactomedin-like protein 3	0.449886	Down	0.000395	OLFML3			45.926	extracellular							IPR003112;	Olfactomedin-like domain;
F1SBT5	Uncharacterized protein	2.45971	Up	0.0203	GTF2F1	General transcription factor IIF subunit 1 OS=Homo sapiens GN=GTF2F1 PE=1 SV=2	General transcription factor IIF subunit 1 OS=Mus musculus GN=Gtf2f1 PE=1 SV=2	58.329	nucleus	nucleic acid-templated transcription; positive regulation of biosynthetic process; biosynthetic process; cellular metabolic process; regulation of RNA biosynthetic process; metabolic process; positive regulation of metabolic process; positive regulation of nitrogen compound metabolic process; regulation of DNA-templated transcription, elongation; macromolecule metabolic process; positive regulati…	organelle; intracellular membrane-bounded organelle; intracellular organelle; nucleus; cell part; intracellular; intracellular part; membrane-bounded organelle; cell;	organic cyclic compound binding; heterocyclic compound binding; DNA binding; catalytic activity; binding; nucleic acid binding;	K03138	TFIIF1; transcription initiation factor TFIIF subunit alpha	ssc03022 Basal transcription factors - Sus scrofa (pig);	IPR011991; IPR011039;	Winged helix-turn-helix DNA-binding domain; Transcription Factor IIF, Rap30/Rap74, interaction;
F1SBU9	Uncharacterized protein	2.02627	Up	0.0126	SAFB2	Scaffold attachment factor B2 OS=Homo sapiens GN=SAFB2 PE=1 SV=1	Scaffold attachment factor B1 OS=Mus musculus GN=Safb PE=1 SV=2	108.3	cyto_nucl			organic cyclic compound binding; heterocyclic compound binding; nucleoside phosphate binding; binding; nucleic acid binding; nucleotide binding; small molecule binding;				IPR003034; IPR000504; IPR012677;	SAP domain; RNA recognition motif domain; Nucleotide-binding alpha-beta plait domain;
F1SC20	Alpha-1B-glycoprotein	0.502104	Down	0.00247	A1BG			54.396	extracellular			protein binding; binding;				IPR003598; IPR007110; IPR013783; IPR003599;	Immunoglobulin subtype 2; Immunoglobulin-like domain; Immunoglobulin-like fold; Immunoglobulin subtype;
F1SC57	Uncharacterized protein	0.512275	Down	0.0105	---	Phospholipid transfer protein OS=Homo sapiens GN=PLTP PE=1 SV=1	Phospholipid transfer protein OS=Mus musculus GN=Pltp PE=1 SV=1	18.13	extracellular			lipid binding; binding;	K08761	PLTP; phospholipid transfer protein	ssc03320 PPAR signaling pathway - Sus scrofa (pig);	IPR017943; IPR017942;	Bactericidal permeability-increasing protein, alpha/beta domain; Lipid-binding serum glycoprotein, N-terminal;
F1SC59	Uncharacterized protein	0.575398	Down	0.000106	PCIF1	Phosphorylated CTD-interacting factor 1 OS=Homo sapiens GN=PCIF1 PE=1 SV=1	Phosphorylated CTD-interacting factor 1 OS=Mus musculus GN=Pcif1 PE=1 SV=1	48.408	nucleus			protein binding; binding;	K17584			IPR029048; IPR001202;	Heat shock protein 70kD, C-terminal domain; WW domain;
F1SC64	Uncharacterized protein	1.50218	Up	0.00465	HELLS	Lymphoid-specific helicase OS=Homo sapiens GN=HELLS PE=1 SV=1	Lymphocyte-specific helicase OS=Mus musculus GN=Hells PE=1 SV=2	97.11	cytoplasm			ATP binding; nucleoside phosphate binding; nucleoside binding; ion binding; nucleotide binding; organic cyclic compound binding; heterocyclic compound binding; ribonucleoside binding; carbohydrate derivative binding; ribonucleotide binding; binding; purine ribonucleoside binding; anion binding; purine ribonucleotide binding; adenyl ribonucleotide binding; adenyl nucleotide binding; purine nucleos…	K19001			IPR014001; IPR027417; IPR001650; IPR000330;	Helicase superfamily 1/2, ATP-binding domain; P-loop containing nucleoside triphosphate hydrolase; Helicase, C-terminal; SNF2-related, N-terminal domain;
F1SC76	Uncharacterized protein	2.18867	Up	0.0168	ACOT8	Acyl-coenzyme A thioesterase 8 OS=Homo sapiens GN=ACOT8 PE=1 SV=1	Acyl-coenzyme A thioesterase 8 OS=Mus musculus GN=Acot8 PE=1 SV=1	35.797	nucleus	sulfur compound metabolic process; metabolic process; phosphorus metabolic process; thioester metabolic process; coenzyme metabolic process; cellular metabolic process; cellular process; acyl-CoA metabolic process; cofactor metabolic process; organic substance metabolic process;		acyl-CoA hydrolase activity; hydrolase activity; CoA hydrolase activity; thiolester hydrolase activity; catalytic activity; hydrolase activity, acting on ester bonds;	K11992	ACOT8; acyl-CoA thioesterase 8 [EC:3.1.2.27]	ssc04146 Peroxisome - Sus scrofa (pig); ssc00120 Primary bile acid biosynthesis - Sus scrofa (pig); ssc01100 Metabolic pathways - Sus scrofa (pig);	IPR029069;	HotDog domain;
F1SC78	Uncharacterized protein	2.20873	Up	0.00344	UBE2C	Ubiquitin-conjugating enzyme E2 C OS=Homo sapiens GN=UBE2C PE=1 SV=1	Ubiquitin-conjugating enzyme E2 C OS=Mus musculus GN=Ube2c PE=2 SV=1	19.642	cytoplasm				K06688	UBE2C; ubiquitin-conjugating enzyme E2 C [EC:2.3.2.23]	ssc04120 Ubiquitin mediated proteolysis - Sus scrofa (pig);	IPR016135; IPR000608;	Ubiquitin-conjugating enzyme/RWD-like; Ubiquitin-conjugating enzyme E2;
F1SCF5	Uncharacterized protein	0.617642	Down	0.00144	LOC100627777	DnaJ homolog subfamily B member 1 OS=Homo sapiens GN=DNAJB1 PE=1 SV=4	DnaJ homolog subfamily B member 1 OS=Mus musculus GN=Dnajb1 PE=2 SV=3	38.014	nucleus	protein folding; cellular process;		protein binding; unfolded protein binding; binding;	K09507	DNAJB1; DnaJ homolog subfamily B member 1	ssc05164 Influenza A - Sus scrofa (pig); ssc04141 Protein processing in endoplasmic reticulum - Sus scrofa (pig);	IPR008971; IPR002939; IPR001623;	HSP40/DnaJ peptide-binding; Chaperone DnaJ, C-terminal; DnaJ domain;
F1SCH3	Uncharacterized protein	0.639524	Down	0.0066	DDX39A	ATP-dependent RNA helicase DDX39A OS=Homo sapiens GN=DDX39A PE=1 SV=2	ATP-dependent RNA helicase DDX39A OS=Mus musculus GN=Ddx39a PE=2 SV=1	54.345	cytoplasm			ATP binding; nucleoside phosphate binding; nucleoside binding; ion binding; nucleotide binding; organic cyclic compound binding; heterocyclic compound binding; ribonucleoside binding; carbohydrate derivative binding; ribonucleotide binding; binding; nucleic acid binding; purine ribonucleoside binding; anion binding; purine ribonucleotide binding; adenyl ribonucleotide binding; adenyl nucleotide b…	K13182			IPR014014; IPR011545; IPR027417; IPR014001; IPR001650;	RNA helicase, DEAD-box type, Q motif; DEAD/DEAH box helicase domain; P-loop containing nucleoside triphosphate hydrolase; Helicase superfamily 1/2, ATP-binding domain; Helicase, C-terminal;
F1SCI3	Uncharacterized protein	0.615998	Down	0.00393	LOC102164085	A-kinase anchor protein 13 OS=Homo sapiens GN=AKAP13 PE=1 SV=2	Protein Akap13 OS=Mus musculus GN=Akap13 PE=2 SV=1	24.302	extracellular							IPR020683;	Ankyrin repeat-containing domain;
F1SCJ6	Uncharacterized protein	0.553686	Down	0.000162	NR2F2	COUP transcription factor 2 OS=Homo sapiens GN=NR2F2 PE=1 SV=1	COUP transcription factor 2 OS=Mus musculus GN=Nr2f2 PE=1 SV=2	45.541	nucleus	single organism signaling; regulation of cellular process; regulation of macromolecule metabolic process; cellular response to organic substance; regulation of nucleobase-containing compound metabolic process; single-organism process; response to stimulus; cellular response to steroid hormone stimulus; response to lipid; regulation of RNA biosynthetic process; signal transduction; cell communicat…	organelle; intracellular membrane-bounded organelle; intracellular organelle; nucleus; cell part; intracellular; intracellular part; membrane-bounded organelle; cell;	steroid hormone receptor activity; signaling receptor activity; RNA polymerase II transcription factor activity, sequence-specific DNA binding; DNA binding; ion binding; sequence-specific DNA binding; zinc ion binding; signal transducer activity; transcription factor activity, sequence-specific DNA binding; heterocyclic compound binding; organic cyclic compound binding; transcription factor activ…	K08548			IPR013088; IPR001628; IPR000536;	Zinc finger, NHR/GATA-type; Zinc finger, nuclear hormone receptor-type; Nuclear hormone receptor, ligand-binding domain;
F1SCX8	Uncharacterized protein	0.497211	Down	0.00276	PANK1	Pantothenate kinase 1 OS=Homo sapiens GN=PANK1 PE=1 SV=2	Pantothenate kinase 1 OS=Mus musculus GN=Pank1 PE=1 SV=1	64.338	cytoplasm	cofactor biosynthetic process; nucleoside metabolic process; purine nucleoside metabolic process; nucleotide metabolic process; single-organism process; purine ribonucleoside biosynthetic process; nucleoside biosynthetic process; biosynthetic process; cellular metabolic process; phosphate-containing compound metabolic process; ribose phosphate biosynthetic process; metabolic process; carbohydrate…		ATP binding; nucleoside phosphate binding; phosphotransferase activity, alcohol group as acceptor; nucleoside binding; ion binding; nucleotide binding; pantothenate kinase activity; organic cyclic compound binding; heterocyclic compound binding; ribonucleoside binding; carbohydrate derivative binding; kinase activity; catalytic activity; ribonucleotide binding; binding; purine ribonucleoside bind…	K09680	coaW; type II pantothenate kinase [EC:2.7.1.33]	ssc00770 Pantothenate and CoA biosynthesis - Sus scrofa (pig); ssc01100 Metabolic pathways - Sus scrofa (pig);
F1SCY0	Uncharacterized protein	0.533333	Down	0.00167	IFIT5	Interferon-induced protein with tetratricopeptide repeats 5 OS=Homo sapiens GN=IFIT5 PE=1 SV=1	Protein Gm14446 OS=Mus musculus GN=Gm14446 PE=2 SV=1	54.246	cytoplasm			protein binding; binding;				IPR011990; IPR013026;	Tetratricopeptide-like helical domain; Tetratricopeptide repeat-containing domain;
F1SCZ4	Uncharacterized protein	0.620618	Down	0.000705	PAPSS2	Bifunctional 3'-phosphoadenosine 5'-phosphosulfate synthase 2 OS=Homo sapiens GN=PAPSS2 PE=1 SV=2	Bifunctional 3'-phosphoadenosine 5'-phosphosulfate synthase 2 OS=Mus musculus GN=Papss2 PE=1 SV=2	69.9	cyto_nucl	sulfate assimilation; sulfur compound metabolic process; metabolic process; cellular metabolic process; cellular process;		ATP binding; sulfate adenylyltransferase activity; nucleoside phosphate binding; phosphotransferase activity, alcohol group as acceptor; nucleoside binding; ion binding; nucleotide binding; adenylyltransferase activity; organic cyclic compound binding; heterocyclic compound binding; ribonucleoside binding; carbohydrate derivative binding; kinase activity; nucleotidyltransferase activity; adenylyl…	K13811	PAPSS; 3'-phosphoadenosine 5'-phosphosulfate synthase [EC:2.7.7.4 2.7.1.25]	ssc00230 Purine metabolism - Sus scrofa (pig); ssc00450 Selenocompound metabolism - Sus scrofa (pig); ssc00920 Sulfur metabolism - Sus scrofa (pig); ssc01100 Metabolic pathways - Sus scrofa (pig);	IPR014729; IPR015947; IPR025980; IPR027417; IPR024951; IPR002650;	Rossmann-like alpha/beta/alpha sandwich fold; PUA-like domain; ATP-sulfurylase PUA-like domain; P-loop containing nucleoside triphosphate hydrolase; Sulphate adenylyltransferase catalytic domain; Sulphate adenylyltransferase;
F1SD66	Chromogranin-A	0.421908	Down	0.0104	CHGA			49.621	extracellular		organelle; intracellular vesicle; intracellular organelle; cytoplasmic vesicle; cell part; intracellular; secretory vesicle; cytoplasm; vesicle; endomembrane system; intracellular part; secretory granule; cell; membrane-bounded organelle; cytoplasmic part;		K19990
F1SD67	Uncharacterized protein	2.61429	Up	0.000245	GOLGA5	Golgin subfamily A member 5 OS=Homo sapiens GN=GOLGA5 PE=1 SV=3	Golgin subfamily A member 5 OS=Mus musculus GN=Golga5 PE=1 SV=2	82.542	cytoplasm	cellular component organization; endomembrane system organization; Golgi organization; cellular process; organelle organization; cellular component organization or biogenesis;
F1SD70	Uncharacterized protein	0.592901	Down	0.0147	LGMN	Legumain OS=Homo sapiens GN=LGMN PE=1 SV=1	Legumain OS=Mus musculus GN=Lgmn PE=1 SV=1	30.489	extracellular	proteolysis; metabolic process; macromolecule metabolic process; protein metabolic process; primary metabolic process; organic substance metabolic process;		peptidase activity; hydrolase activity; catalytic activity;
F1SD78	Methylthioribose-1-phosphate isomerase	1.66209	Up	0.00222	MRI1			37.812	mitochondria	biosynthetic process; metabolic process; cellular metabolic process; cellular process; cellular biosynthetic process;			K08963	mtnA; methylthioribose-1-phosphate isomerase [EC:5.3.1.23]	ssc00270 Cysteine and methionine metabolism - Sus scrofa (pig); ssc01100 Metabolic pathways - Sus scrofa (pig);	IPR027363;	Methylthioribose-1-phosphate isomerase-like, N-terminal domain;
F1SD87	Uncharacterized protein	0.248403	Down	0.000168	FBLN5	Fibulin-5 OS=Homo sapiens GN=FBLN5 PE=1 SV=1	Fibulin-5 OS=Mus musculus GN=Fbln5 PE=2 SV=1	50.165	extracellular			cation binding; metal ion binding; protein binding; calcium ion binding; binding; ion binding;	K17340			IPR026823; IPR001881; IPR000742; IPR009030;	Complement Clr-like EGF domain; EGF-like calcium-binding domain; EGF-like domain; Growth factor receptor cysteine-rich domain;
F1SD95	Uncharacterized protein	1.73762	Up	0.0201	GADD45GIP1	Growth arrest and DNA damage-inducible proteins-interacting protein 1 OS=Homo sapiens GN=GADD45GIP1 PE=1 SV=1	Growth arrest and DNA damage-inducible proteins-interacting protein 1 OS=Mus musculus GN=Gadd45gip1 PE=2 SV=1	25.771	mitochondria	single-organism cellular process; single-organism process; cellular process; cell cycle;	organelle; intracellular membrane-bounded organelle; intracellular organelle; nucleus; cell part; intracellular; intracellular part; membrane-bounded organelle; cell;
F1SD97	Uncharacterized protein	0.618139	Down	6.36e-05	FARSA	Phenylalanine--tRNA ligase alpha subunit OS=Homo sapiens GN=FARSA PE=1 SV=3	Phenylalanine--tRNA ligase alpha subunit OS=Mus musculus GN=Farsa PE=2 SV=1	57.627	nucleus	peptide metabolic process; cellular aromatic compound metabolic process; cellular protein metabolic process; single-organism process; biosynthetic process; organonitrogen compound biosynthetic process; tRNA aminoacylation; cellular metabolic process; organic substance metabolic process; phenylalanyl-tRNA aminoacylation; metabolic process; cellular amino acid metabolic process; heterocycle metabol…	intracellular part; cell; cell part; intracellular; cytoplasm;	ligase activity, forming aminoacyl-tRNA and related compounds; RNA binding; ATP binding; nucleoside phosphate binding; ligase activity, forming carbon-oxygen bonds; ligase activity; nucleoside binding; ion binding; phenylalanine-tRNA ligase activity; nucleotide binding; organic cyclic compound binding; heterocyclic compound binding; ribonucleoside binding; carbohydrate derivative binding; catalyt…	K01889	FARSA; phenylalanyl-tRNA synthetase alpha chain [EC:6.1.1.20]	ssc00970 Aminoacyl-tRNA biosynthesis - Sus scrofa (pig);	IPR011991; IPR002319; IPR006195;	Winged helix-turn-helix DNA-binding domain; Phenylalanyl-tRNA synthetase; Aminoacyl-tRNA synthetase, class II;
F1SDA3	Uncharacterized protein	0.642455	Down	0.0352	RPS6KA5	Ribosomal protein S6 kinase alpha-5 OS=Homo sapiens GN=RPS6KA5 PE=1 SV=1	Ribosomal protein S6 kinase alpha-4 OS=Mus musculus GN=Rps6ka4 PE=1 SV=2	59.175	nucleus	regulation of cellular process; single organism signaling; cellular response to stimulus; phosphorylation; intracellular signal transduction; cellular protein metabolic process; single-organism process; signaling; response to stimulus; primary metabolic process; cellular metabolic process; phosphate-containing compound metabolic process; organic substance metabolic process; signal transduction; m…		magnesium ion binding; ATP binding; nucleoside phosphate binding; phosphotransferase activity, alcohol group as acceptor; nucleoside binding; ion binding; protein kinase activity; nucleotide binding; organic cyclic compound binding; heterocyclic compound binding; ribonucleoside binding; carbohydrate derivative binding; kinase activity; catalytic activity; ribonucleotide binding; binding; purine r…				IPR000719; IPR017892; IPR011009; IPR000961;	Protein kinase domain; Protein kinase, C-terminal; Protein kinase-like domain; AGC-kinase, C-terminal;
F1SDC2	Uncharacterized protein	1.53496	Up	0.0306	ACP6	Lysophosphatidic acid phosphatase type 6 OS=Homo sapiens GN=ACP6 PE=1 SV=2	Lysophosphatidic acid phosphatase type 6 OS=Mus musculus GN=Acp6 PE=2 SV=1	48.485	mitochondria			hydrolase activity; acid phosphatase activity; catalytic activity; phosphoric ester hydrolase activity; phosphatase activity; hydrolase activity, acting on ester bonds;	K14395
F1SDE3	Uncharacterized protein	0.656087	Down	0.00869	---	Centromere protein V OS=Homo sapiens GN=CENPV PE=1 SV=1	Centromere protein V OS=Mus musculus GN=Cenpv PE=2 SV=2	17.232	extracellular	metabolic process;		lyase activity; carbon-sulfur lyase activity; catalytic activity;				IPR006913; IPR011057;	Glutathione-dependent formaldehyde-activating enzyme/centromere protein V; Mss4-like;
F1SDG0	Uncharacterized protein	2.00719	Up	2.32e-06	SF3B4	Splicing factor 3B subunit 4 OS=Homo sapiens GN=SF3B4 PE=1 SV=1	Splicing factor 3B subunit 4 OS=Mus musculus GN=Sf3b4 PE=2 SV=1	44.385	nucleus			organic cyclic compound binding; heterocyclic compound binding; nucleoside phosphate binding; binding; nucleic acid binding; nucleotide binding; small molecule binding;	K12831	SF3B4; splicing factor 3B subunit 4	ssc03040 Spliceosome - Sus scrofa (pig);	IPR034158; IPR000504; IPR012677; IPR034159;	SF3B4, RNA recognition motif 1; RNA recognition motif domain; Nucleotide-binding alpha-beta plait domain; SF3B4, RNA recognition motif 2;
F1SDG7	Uncharacterized protein	0.432435	Down	0.000134	---	Acidic leucine-rich nuclear phosphoprotein 32 family member E OS=Homo sapiens GN=ANP32E PE=1 SV=1	Acidic leucine-rich nuclear phosphoprotein 32 family member E OS=Mus musculus GN=Anp32e PE=1 SV=2	15.012	extracellular			protein binding; binding;	K18648			IPR032675;	Leucine-rich repeat domain, L domain-like;
F1SDG9	Uncharacterized protein	0.648931	Down	0.0396	---	AP-3 complex subunit delta-1 OS=Homo sapiens GN=AP3D1 PE=1 SV=1	AP-3 complex subunit delta-1 OS=Mus musculus GN=Ap3d1 PE=1 SV=1	29.122	cytoplasm	establishment of protein localization; transport; intracellular transport; cellular macromolecule localization; establishment of localization in cell; vesicle-mediated transport; intracellular protein transport; organic substance transport; protein localization; macromolecule localization; cellular protein localization; localization; protein transport; establishment of localization; cellular loca…	membrane; cell part; intracellular; membrane protein complex; membrane part; coated membrane; cytoplasm; macromolecular complex; intracellular part; membrane coat; cell; protein complex; cytoplasmic part;	binding;	K12396	AP3D; AP-3 complex subunit delta	ssc04142 Lysosome - Sus scrofa (pig);	IPR011989; IPR016024; IPR002553;	Armadillo-like helical; Armadillo-type fold; Clathrin/coatomer adaptor, adaptin-like, N-terminal;
F1SDN6	Uncharacterized protein	0.509408	Down	0.000119	CTBP2	C-terminal-binding protein 2 OS=Homo sapiens GN=CTBP2 PE=1 SV=1	C-terminal-binding protein 2 OS=Mus musculus GN=Ctbp2 PE=1 SV=2	88.259	cytoplasm	single-organism process; metabolic process; oxidation-reduction process; single-organism metabolic process;		organic cyclic compound binding; heterocyclic compound binding; oxidoreductase activity, acting on CH-OH group of donors; oxidoreductase activity, acting on the CH-OH group of donors, NAD or NADP as acceptor; nucleoside phosphate binding; NAD binding; catalytic activity; binding; nucleotide binding; cofactor binding; small molecule binding; coenzyme binding; oxidoreductase activity;	K04496	CTBP; C-terminal binding protein	ssc04310 Wnt signaling pathway - Sus scrofa (pig); ssc04330 Notch signaling pathway - Sus scrofa (pig); ssc05220 Chronic myeloid leukemia - Sus scrofa (pig); ssc05200 Pathways in cancer - Sus scrofa (pig);	IPR006139; IPR006140; IPR016040;	D-isomer specific 2-hydroxyacid dehydrogenase, catalytic domain; D-isomer specific 2-hydroxyacid dehydrogenase, NAD-binding domain; NAD(P)-binding domain;
F1SDP1	Protein-lysine N-methyltransferase METTL10	0.478468	Down	0.000182	METTL10			25.572	cytoplasm			transferase activity, transferring one-carbon groups; methyltransferase activity; catalytic activity; transferase activity;				IPR025714; IPR029063;	Methyltransferase domain; S-adenosyl-L-methionine-dependent methyltransferase;
F1SDR3	Uncharacterized protein	0.586674	Down	9.26e-05	---	Serine/threonine-protein kinase 4 OS=Homo sapiens GN=STK4 PE=1 SV=2	Serine/threonine-protein kinase 4 OS=Mus musculus GN=Stk4 PE=1 SV=1	23.552	cytoplasm	phosphorylation; cellular protein metabolic process; primary metabolic process; cellular metabolic process; phosphate-containing compound metabolic process; organic substance metabolic process; metabolic process; protein phosphorylation; phosphorus metabolic process; cellular macromolecule metabolic process; cellular protein modification process; protein metabolic process; macromolecule metabolic…		ATP binding; nucleoside phosphate binding; phosphotransferase activity, alcohol group as acceptor; nucleoside binding; ion binding; protein kinase activity; nucleotide binding; organic cyclic compound binding; heterocyclic compound binding; ribonucleoside binding; carbohydrate derivative binding; kinase activity; catalytic activity; ribonucleotide binding; binding; purine ribonucleoside binding; …				IPR000719; IPR011009;	Protein kinase domain; Protein kinase-like domain;
F1SDR7	Uncharacterized protein	1.55992	Up	0.0125	YWHAB	14-3-3 protein beta/alpha OS=Homo sapiens GN=YWHAB PE=1 SV=3	14-3-3 protein beta/alpha OS=Mus musculus GN=Ywhab PE=1 SV=3	28.112	cytoplasm			protein domain specific binding; protein binding; binding;	K16197	YWHAB_Q_Z; 14-3-3 protein beta/theta/zeta	ssc05169 Epstein-Barr virus infection - Sus scrofa (pig); ssc04151 PI3K-Akt signaling pathway - Sus scrofa (pig); ssc04114 Oocyte meiosis - Sus scrofa (pig); ssc04390 Hippo signaling pathway - Sus scrofa (pig); ssc05203 Viral carcinogenesis - Sus scrofa (pig); ssc04110 Cell cycle - Sus scrofa (pig); ssc05161 Hepatitis B - Sus scrofa (pig);	IPR023410;	14-3-3 domain;
F1SDV6	Phosphoinositide phospholipase C	0.653916	Down	0.00668	PLCG1			149.09	cyto_nucl	regulation of cellular process; single organism signaling; organophosphate catabolic process; single-organism process; cellular lipid metabolic process; response to stimulus; cellular metabolic process; phosphate-containing compound metabolic process; organic substance metabolic process; phospholipid catabolic process; signal transduction; metabolic process; cell communication; cellular catabolic…		phospholipase C activity; ion binding; protein binding; hydrolase activity; lipase activity; signal transducer activity; phosphatidylinositol phospholipase C activity; phosphoric ester hydrolase activity; catalytic activity; binding; hydrolase activity, acting on ester bonds; phospholipase activity; metal ion binding; cation binding; phosphoric diester hydrolase activity; calcium ion binding;	K01116	PLCG1; phosphatidylinositol phospholipase C, gamma-1 [EC:3.1.4.11]	ssc01521 EGFR tyrosine kinase inhibitor resistance - Sus scrofa (pig); ssc04658 Th1 and Th2 cell differentiation - Sus scrofa (pig); ssc05231 Choline metabolism in cancer - Sus scrofa (pig); ssc04659 Th17 cell differentiation - Sus scrofa (pig); ssc04750 Inflammatory mediator regulation of TRP channels - Sus scrofa (pig); ssc04666 Fc gamma R-mediated phagocytosis - Sus scrofa (pig); ssc05169 Epst…	IPR000909; IPR002048; IPR011992; IPR001849; IPR001711; IPR001452; IPR000980; IPR017946; IPR011993; IPR000008;	Phosphatidylinositol-specific phospholipase C, X domain; EF-hand domain; EF-hand domain pair; Pleckstrin homology domain; Phospholipase C, phosphatidylinositol-specific, Y domain; SH3 domain; SH2 domain; PLC-like phosphodiesterase, TIM beta/alpha-barrel domain; PH domain-like; C2 domain;
F1SDW1	Uncharacterized protein	0.521952	Down	0.00309	NCOA4	Nuclear receptor coactivator 4 OS=Homo sapiens GN=NCOA4 PE=1 SV=1	Nuclear receptor coactivator 4 OS=Mus musculus GN=Ncoa4 PE=2 SV=1	70.403	cytoplasm				K09289	NCOA4; nuclear receptor coactivator 4	ssc05216 Thyroid cancer - Sus scrofa (pig); ssc05200 Pathways in cancer - Sus scrofa (pig);
F1SDX4	Uncharacterized protein	0.570796	Down	0.00515	---	Ral GTPase-activating protein subunit beta OS=Homo sapiens GN=RALGAPB PE=1 SV=1	Ral GTPase-activating protein subunit beta OS=Mus musculus GN=Ralgapb PE=2 SV=1	125.68	plasma membrane
F1SDX6	Uncharacterized protein	0.5411	Down	0.0014	TGM2	Protein-glutamine gamma-glutamyltransferase 2 OS=Homo sapiens GN=TGM2 PE=1 SV=2	Protein-glutamine gamma-glutamyltransferase 2 OS=Mus musculus GN=Tgm2 PE=1 SV=4	77.223	cytoplasm	metabolic process; cellular macromolecule metabolic process; cellular protein metabolic process; peptide cross-linking; cellular protein modification process; macromolecule metabolic process; protein metabolic process; protein modification process; macromolecule modification; primary metabolic process; cellular metabolic process; cellular process; organic substance metabolic process;		transferase activity, transferring acyl groups; catalytic activity; transferase activity; protein-glutamine gamma-glutamyltransferase activity; transferase activity, transferring amino-acyl groups;	K05625	TGM2; transglutaminase 2 [EC:2.3.2.13]	ssc05016 Huntington's disease - Sus scrofa (pig);	IPR008958; IPR013783; IPR002931; IPR014756; IPR001102;	Transglutaminase, C-terminal; Immunoglobulin-like fold; Transglutaminase-like; Immunoglobulin E-set; Transglutaminase, N-terminal;
F1SDX9	Peroxiredoxin 2	1.57371	Up	0.00139	PRDX2			21.88	cytoplasm	regulation of cellular process; homeostatic process; regulation of biological quality; metabolic process; regulation of biological process; oxidation-reduction process; single-organism metabolic process; cell redox homeostasis; single-organism cellular process; cellular homeostasis; single-organism process; cellular process; biological regulation;		antioxidant activity; catalytic activity; peroxiredoxin activity; oxidoreductase activity, acting on peroxide as acceptor; oxidoreductase activity;	K03386			IPR019479; IPR000866; IPR013766; IPR012336;	Peroxiredoxin, C-terminal; Alkyl hydroperoxide reductase subunit C/ Thiol specific antioxidant; Thioredoxin domain; Thioredoxin-like fold;
F1SDY8	Uncharacterized protein	1.55027	Up	0.000234	ZC3H14	Zinc finger CCCH domain-containing protein 14 OS=Homo sapiens GN=ZC3H14 PE=1 SV=1	Zinc finger CCCH domain-containing protein 14 OS=Mus musculus GN=Zc3h14 PE=1 SV=1	82.871	nucleus			metal ion binding; cation binding; binding; ion binding;				IPR000571;	Zinc finger, CCCH-type;
F1SE06	Uncharacterized protein	0.633198	Down	0.0148	AHSA1	Activator of 90 kDa heat shock protein ATPase homolog 1 OS=Homo sapiens GN=AHSA1 PE=1 SV=1	Activator of 90 kDa heat shock protein ATPase homolog 1 OS=Mus musculus GN=Ahsa1 PE=2 SV=2	38.33	cytoplasm	response to stress; response to stimulus;		ATPase activator activity; enzyme regulator activity; chaperone binding; binding; nucleoside-triphosphatase regulator activity; protein binding; ATPase regulator activity; molecular function regulator; enzyme activator activity;				IPR015310; IPR023393;	Activator of Hsp90 ATPase, N-terminal; START-like domain;
F1SE53	Mast/stem cell growth factor receptor Kit	3.39637	Up	0.0014	KIT			106.45	cyto_nucl	regulation of cellular process; single organism signaling; phosphorylation; cell surface receptor signaling pathway; cellular response to organic substance; cellular protein metabolic process; single-organism process; response to stimulus; cellular response to cytokine stimulus; cellular metabolic process; phosphate-containing compound metabolic process; organic substance metabolic process; signa…	membrane;	nucleoside phosphate binding; phosphotransferase activity, alcohol group as acceptor; signal transducer, downstream of receptor, with protein tyrosine kinase activity; protein tyrosine kinase activity; protein binding; protein kinase activity; transmembrane signaling receptor activity; signal transducer activity; transmembrane receptor protein tyrosine kinase activity; organic cyclic compound bin…	K05091	KIT; proto-oncogene tyrosine-protein kinase Kit [EC:2.7.10.1]	ssc05230 Central carbon metabolism in cancer - Sus scrofa (pig); ssc04151 PI3K-Akt signaling pathway - Sus scrofa (pig); ssc04014 Ras signaling pathway - Sus scrofa (pig); ssc05221 Acute myeloid leukemia - Sus scrofa (pig); ssc05200 Pathways in cancer - Sus scrofa (pig); ssc04144 Endocytosis - Sus scrofa (pig); ssc04640 Hematopoietic cell lineage - Sus scrofa (pig); ssc04015 Rap1 signaling pathwa…	IPR003598; IPR007110; IPR003599; IPR001245; IPR011009; IPR000719; IPR013783; IPR020635; IPR013151;	Immunoglobulin subtype 2; Immunoglobulin-like domain; Immunoglobulin subtype; Serine-threonine/tyrosine-protein kinase catalytic domain; Protein kinase-like domain; Protein kinase domain; Immunoglobulin-like fold; Tyrosine-protein kinase, catalytic domain; Immunoglobulin;
F1SE87	Uncharacterized protein	1.80429	Up	0.00234	CHMP5	Charged multivesicular body protein 5 OS=Homo sapiens GN=CHMP5 PE=1 SV=1	Charged multivesicular body protein 5 OS=Mus musculus GN=Chmp5 PE=2 SV=1	20.752	mitochondria	transport; localization; vacuolar transport; establishment of localization;			K12198	CHMP5; charged multivesicular body protein 5	ssc04144 Endocytosis - Sus scrofa (pig);
F1SEE4	Uncharacterized protein	0.605603	Down	0.0149	ZNF512	Zinc finger protein 512 OS=Homo sapiens GN=ZNF512 PE=1 SV=2	Zinc finger protein 512 OS=Mus musculus GN=Znf512 PE=2 SV=2	64.311	nucleus			metal ion binding; cation binding; binding; ion binding;				IPR015880; IPR007087;	Zinc finger, C2H2-like; Zinc finger, C2H2;
F1SEF7	Serine/threonine-protein phosphatase	0.622376	Down	0.000515	PPP1CB			35.516	mitochondria			hydrolase activity; catalytic activity;	K06269	PPP1C; serine/threonine-protein phosphatase PP1 catalytic subunit [EC:3.1.3.16]	ssc04114 Oocyte meiosis - Sus scrofa (pig); ssc04510 Focal adhesion - Sus scrofa (pig); ssc04390 Hippo signaling pathway - Sus scrofa (pig); ssc04022 cGMP-PKG signaling pathway - Sus scrofa (pig); ssc04750 Inflammatory mediator regulation of TRP channels - Sus scrofa (pig); ssc05205 Proteoglycans in cancer - Sus scrofa (pig); ssc05031 Amphetamine addiction - Sus scrofa (pig); ssc04270 Vascular sm…	IPR029052; IPR004843; IPR031675; IPR006186;	Metallo-dependent phosphatase-like; Calcineurin-like phosphoesterase domain, ApaH type; Serine-threonine protein phosphatase, N-terminal; Serine/threonine-specific protein phosphatase/bis(5-nucleosyl)-tetraphosphatase;
F1SEH4	Uncharacterized protein	0.293168	Down	5.33e-05	HTRA1	Serine protease HTRA1 OS=Homo sapiens GN=HTRA1 PE=1 SV=1	Serine protease HTRA1 OS=Mus musculus GN=Htra1 PE=1 SV=2	55.582	plasma membrane	regulation of cell growth; regulation of cellular process; metabolic process; regulation of biological process; regulation of growth; proteolysis; macromolecule metabolic process; protein metabolic process; regulation of cellular component organization; primary metabolic process; organic substance metabolic process; biological regulation;	extracellular region;	insulin-like growth factor binding; serine-type endopeptidase activity; endopeptidase activity; peptidase activity; growth factor binding; catalytic activity; serine hydrolase activity; binding; serine-type peptidase activity; peptidase activity, acting on L-amino acid peptides; protein binding; hydrolase activity;	K08784			IPR009003; IPR002350; IPR001478; IPR000867; IPR009030;	Peptidase S1, PA clan; Kazal domain; PDZ domain; Insulin-like growth factor-binding protein, IGFBP; Growth factor receptor cysteine-rich domain;
F1SEH8	Arginyl-tRNA--protein transferase 1	0.577977	Down	0.00051	ATE1			58.777	plasma membrane	protein arginylation; modification-dependent macromolecule catabolic process; cellular macromolecule catabolic process; proteolysis involved in cellular protein catabolic process; cellular protein catabolic process; modification-dependent protein catabolic process; cellular protein metabolic process; ubiquitin-dependent protein catabolic process; primary metabolic process; cellular metabolic proc…		transferase activity, transferring acyl groups; catalytic activity; transferase activity; arginyltransferase activity; transferase activity, transferring amino-acyl groups;	K00685			IPR007471; IPR016181; IPR007472;	Arginine-tRNA-protein transferase, N-terminal; Acyl-CoA N-acyltransferase; Arginine-tRNA-protein transferase, C-terminal;
F1SEQ3	Uncharacterized protein	2.68861	Up	0.00451	GHITM	Growth hormone-inducible transmembrane protein OS=Homo sapiens GN=GHITM PE=1 SV=2	Growth hormone-inducible transmembrane protein OS=Mus musculus GN=Ghitm PE=2 SV=1	37.077	plasma membrane
F1SES5	Uncharacterized protein	0.462543	Down	0.000905	ASAH1	Acid ceramidase OS=Homo sapiens GN=ASAH1 PE=1 SV=5	Acid ceramidase OS=Mus musculus GN=Asah1 PE=1 SV=1	44.567	extracellular	single-organism process; metabolic process; primary metabolic process; single-organism metabolic process; lipid metabolic process; organic substance metabolic process;	organelle; intracellular membrane-bounded organelle; intracellular organelle; cell part; intracellular; lysosome; cytoplasm; vacuole; intracellular part; cell; membrane-bounded organelle; cytoplasmic part; lytic vacuole;		K12348	ASAH1; acid ceramidase [EC:3.5.1.23]	ssc04071 Sphingolipid signaling pathway - Sus scrofa (pig); ssc04142 Lysosome - Sus scrofa (pig); ssc00600 Sphingolipid metabolism - Sus scrofa (pig); ssc01100 Metabolic pathways - Sus scrofa (pig);	IPR029130; IPR029132;	Acid ceramidase, N-terminal; Choloylglycine hydrolase/NAAA C-terminal;
F1SEX4	Uncharacterized protein	3.36858	Up	1.41e-05	C19orf43			18.621	nucleus
F1SEX5	Uncharacterized protein	0.57366	Down	0.0217	TNPO2	Transportin-2 OS=Homo sapiens GN=TNPO2 PE=1 SV=3	Transportin-2 OS=Mus musculus GN=Tnpo2 PE=2 SV=1	100.42	cytoplasm	establishment of protein localization; transport; intracellular transport; cellular macromolecule localization; establishment of localization in cell; intracellular protein transport; organic substance transport; protein localization; macromolecule localization; cellular protein localization; localization; protein transport; establishment of localization; cellular localization;		small GTPase binding; Ras GTPase binding; binding; protein binding; Ran GTPase binding; GTPase binding; enzyme binding;	K18727			IPR001494; IPR011989; IPR016024;	Importin-beta, N-terminal domain; Armadillo-like helical; Armadillo-type fold;
F1SEZ4	Uncharacterized protein	0.617145	Down	0.00601	MAPKAPK2	MAP kinase-activated protein kinase 2 OS=Homo sapiens GN=MAPKAPK2 PE=1 SV=1	MAP kinase-activated protein kinase 2 OS=Mus musculus GN=Mapkapk2 PE=1 SV=2	46.75	cytoplasm	phosphorylation; cellular protein metabolic process; primary metabolic process; cellular metabolic process; phosphate-containing compound metabolic process; organic substance metabolic process; metabolic process; protein phosphorylation; phosphorus metabolic process; cellular macromolecule metabolic process; cellular protein modification process; protein metabolic process; macromolecule metabolic…		ATP binding; nucleoside phosphate binding; phosphotransferase activity, alcohol group as acceptor; nucleoside binding; ion binding; protein kinase activity; nucleotide binding; organic cyclic compound binding; heterocyclic compound binding; ribonucleoside binding; carbohydrate derivative binding; kinase activity; catalytic activity; ribonucleotide binding; binding; purine ribonucleoside binding; …	K04443	MAPKAPK2; mitogen-activated protein kinase-activated protein kinase 2 [EC:2.7.11.1]	ssc04722 Neurotrophin signaling pathway - Sus scrofa (pig); ssc04010 MAPK signaling pathway - Sus scrofa (pig); ssc05203 Viral carcinogenesis - Sus scrofa (pig); ssc04370 VEGF signaling pathway - Sus scrofa (pig);	IPR000719; IPR027442; IPR011009;	Protein kinase domain; MAP kinase activated protein kinase, C-terminal domain; Protein kinase-like domain;
F1SF75	Uncharacterized protein	2.22807	Up	0.000435	NFYC	Nuclear transcription factor Y subunit gamma OS=Homo sapiens GN=NFYC PE=1 SV=3	Nuclear transcription factor Y subunit gamma OS=Mus musculus GN=Nfyc PE=2 SV=2	37.166	nucleus			protein binding; protein heterodimerization activity; binding; protein dimerization activity;	K08066	NFYC; nuclear transcription factor Y, gamma	ssc05152 Tuberculosis - Sus scrofa (pig); ssc04612 Antigen processing and presentation - Sus scrofa (pig);	IPR009072; IPR003958;	Histone-fold; Transcription factor CBF/NF-Y/archaeal histone domain;
F1SFA1	Uncharacterized protein	0.323328	Down	0.000237	---	Serum paraoxonase/arylesterase 1 OS=Homo sapiens GN=PON1 PE=1 SV=3	Serum paraoxonase/arylesterase 1 OS=Mus musculus GN=Pon1 PE=1 SV=2	26.776	cytoplasm		extracellular region;	hydrolase activity; carboxylic ester hydrolase activity; arylesterase activity; catalytic activity; hydrolase activity, acting on ester bonds;	K01045	PON; arylesterase / paraoxonase [EC:3.1.1.2 3.1.8.1]	ssc01100 Metabolic pathways - Sus scrofa (pig);	IPR011042;	Six-bladed beta-propeller, TolB-like;
F1SFA2	Uncharacterized protein	0.570375	Down	0.000134	PON2	Serum paraoxonase/arylesterase 2 OS=Homo sapiens GN=PON2 PE=1 SV=3	Serum paraoxonase/arylesterase 2 OS=Mus musculus GN=Pon2 PE=1 SV=2	39.428	endoplasmic reticulum		extracellular region;	hydrolase activity; carboxylic ester hydrolase activity; arylesterase activity; catalytic activity; hydrolase activity, acting on ester bonds;	K01045	PON; arylesterase / paraoxonase [EC:3.1.1.2 3.1.8.1]	ssc01100 Metabolic pathways - Sus scrofa (pig);	IPR011042;	Six-bladed beta-propeller, TolB-like;
F1SFA7	Uncharacterized protein	3.02927	Up	0.0173	COL1A2	Collagen alpha-2(I) chain OS=Homo sapiens GN=COL1A2 PE=1 SV=7	Collagen alpha-2(I) chain OS=Mus musculus GN=Col1a2 PE=2 SV=2	129.16	extracellular			extracellular matrix structural constituent; structural molecule activity;	K06236	COL1A; collagen, type I, alpha	ssc05146 Amoebiasis - Sus scrofa (pig); ssc04151 PI3K-Akt signaling pathway - Sus scrofa (pig); ssc04512 ECM-receptor interaction - Sus scrofa (pig); ssc04974 Protein digestion and absorption - Sus scrofa (pig); ssc04611 Platelet activation - Sus scrofa (pig); ssc04510 Focal adhesion - Sus scrofa (pig); ssc04933 AGE-RAGE signaling pathway in diabetic complications - Sus scrofa (pig);	IPR000885;	Fibrillar collagen, C-terminal;
F1SFE6	Uncharacterized protein	0.589607	Down	0.0048	PSMC6	26S protease regulatory subunit 10B OS=Homo sapiens GN=PSMC6 PE=1 SV=1	26S protease regulatory subunit 10B OS=Mus musculus GN=Psmc6 PE=1 SV=1	45.855	cytoplasm	organic substance catabolic process; metabolic process; protein catabolic process; macromolecule catabolic process; macromolecule metabolic process; protein metabolic process; primary metabolic process; catabolic process; organic substance metabolic process;	intracellular part; cell; cell part; intracellular; cytoplasm;	ATP binding; nucleoside phosphate binding; nucleoside binding; ion binding; hydrolase activity; nucleotide binding; organic cyclic compound binding; heterocyclic compound binding; ribonucleoside binding; carbohydrate derivative binding; catalytic activity; ribonucleotide binding; binding; purine ribonucleoside binding; anion binding; purine ribonucleotide binding; adenyl ribonucleotide binding; a…	K03064	PSMC6; 26S proteasome regulatory subunit T4	ssc05169 Epstein-Barr virus infection - Sus scrofa (pig); ssc03050 Proteasome - Sus scrofa (pig);	IPR003959; IPR003593; IPR027417;	ATPase, AAA-type, core; AAA+ ATPase domain; P-loop containing nucleoside triphosphate hydrolase;
F1SFF8	"Alpha-1,4 glucan phosphorylase"	1.62877	Up	0.00064	PYGL			97.534	cytoplasm	metabolic process; carbohydrate metabolic process; primary metabolic process; organic substance metabolic process;		organic cyclic compound binding; heterocyclic compound binding; transferase activity, transferring hexosyl groups; catalytic activity; binding; ion binding; phosphorylase activity; anion binding; transferase activity, transferring glycosyl groups; cofactor binding; transferase activity; pyridoxal phosphate binding; glycogen phosphorylase activity;	K00688	PYG; glycogen phosphorylase [EC:2.4.1.1]	ssc04922 Glucagon signaling pathway - Sus scrofa (pig); ssc04931 Insulin resistance - Sus scrofa (pig); ssc04910 Insulin signaling pathway - Sus scrofa (pig); ssc00500 Starch and sucrose metabolism - Sus scrofa (pig); ssc01100 Metabolic pathways - Sus scrofa (pig);
F1SFH2	Uncharacterized protein	1.81508	Up	0.000794	CCDC50	Coiled-coil domain-containing protein 50 OS=Homo sapiens GN=CCDC50 PE=1 SV=1	Coiled-coil domain-containing protein 50 OS=Mus musculus GN=Ccdc50 PE=1 SV=1	35.595	extracellular							IPR029311;	Coiled-coil domain-containing protein 50, N-terminal;
F1SFI4	Uncharacterized protein	0.544998	Down	0.00673	KNG1	Kininogen-1 OS=Homo sapiens GN=KNG1 PE=1 SV=2	Kininogen-1 OS=Mus musculus GN=Kng1 PE=2 SV=1	43.171	extracellular			endopeptidase regulator activity; enzyme inhibitor activity; molecular function regulator; enzyme regulator activity; endopeptidase inhibitor activity; cysteine-type endopeptidase inhibitor activity; peptidase inhibitor activity; peptidase regulator activity;	K03898	KNG; kininogen	ssc04610 Complement and coagulation cascades - Sus scrofa (pig);	IPR000010; IPR027358;	Cystatin domain; Kininogen-type cystatin domain;
F1SFI7	Alpha-2-HS-glycoprotein	0.635897	Down	0.0216	AHSG			38.43	extracellular		extracellular space; extracellular region part; extracellular region;	endopeptidase regulator activity; enzyme inhibitor activity; molecular function regulator; enzyme regulator activity; endopeptidase inhibitor activity; cysteine-type endopeptidase inhibitor activity; peptidase inhibitor activity; peptidase regulator activity;				IPR000010; IPR025760;	Cystatin domain; Fetuin-A-type cystatin domain;
F1SFK6	Uncharacterized protein	2.40202	Up	0.00257	TMEM87A	Transmembrane protein 87A OS=Homo sapiens GN=TMEM87A PE=1 SV=3	Transmembrane protein 87A OS=Mus musculus GN=Tmem87a PE=2 SV=1	63.738	plasma membrane		intrinsic component of membrane; membrane; integral component of membrane; membrane part;
F1SFN5	Uncharacterized protein	0.338502	Down	0.00103	LOC100736857	Microphthalmia-associated transcription factor OS=Homo sapiens GN=MITF PE=1 SV=2	Microphthalmia-associated transcription factor OS=Mus musculus GN=Mitf PE=2 SV=1	22.712	nucleus				K09455	MITF; microphthalmia-associated transcription factor	ssc04380 Osteoclast differentiation - Sus scrofa (pig); ssc05218 Melanoma - Sus scrofa (pig); ssc04916 Melanogenesis - Sus scrofa (pig); ssc05200 Pathways in cancer - Sus scrofa (pig);	IPR031867;	MiT/TFE transcription factors, N-terminal;
F1SFP0	Uncharacterized protein	2.16124	Up	1.8e-05	ATF7	Cyclic AMP-dependent transcription factor ATF-7 OS=Homo sapiens GN=ATF7 PE=1 SV=2	Cyclic AMP-dependent transcription factor ATF-7 OS=Mus musculus GN=Atf7 PE=1 SV=1	51.727	nucleus	regulation of cellular process; regulation of gene expression; regulation of transcription, DNA-templated; regulation of cellular biosynthetic process; regulation of primary metabolic process; regulation of macromolecule metabolic process; regulation of nucleobase-containing compound metabolic process; regulation of macromolecule biosynthetic process; regulation of cellular metabolic process; reg…		organic cyclic compound binding; heterocyclic compound binding; DNA binding; binding; nucleic acid binding transcription factor activity; nucleic acid binding; ion binding; cation binding; metal ion binding; sequence-specific DNA binding; transcription factor activity, sequence-specific DNA binding;	K09045			IPR004827; IPR015880; IPR007087; IPR013087;	Basic-leucine zipper domain; Zinc finger, C2H2-like; Zinc finger, C2H2; Zinc finger C2H2-type/integrase DNA-binding domain;
F1SFQ0	Uncharacterized protein	0.647572	Down	0.0255	UBA3	NEDD8-activating enzyme E1 catalytic subunit OS=Homo sapiens GN=UBA3 PE=1 SV=2	NEDD8-activating enzyme E1 catalytic subunit OS=Mus musculus GN=Uba3 PE=1 SV=2	52.485	cytoplasm	protein neddylation; metabolic process; protein modification by small protein conjugation; cellular macromolecule metabolic process; cellular protein metabolic process; cellular protein modification process; macromolecule metabolic process; protein metabolic process; protein modification by small protein conjugation or removal; macromolecule modification; protein modification process; primary met…		small protein activating enzyme activity; ATP binding; nucleoside phosphate binding; nucleoside binding; ion binding; ligase activity; ligase activity, forming carbon-sulfur bonds; nucleotide binding; acid-amino acid ligase activity; ligase activity, forming carbon-nitrogen bonds; organic cyclic compound binding; heterocyclic compound binding; ribonucleoside binding; carbohydrate derivative bindi…	K10686	UBE1C; ubiquitin-activating enzyme E1 C [EC:6.2.1.45]	ssc04120 Ubiquitin mediated proteolysis - Sus scrofa (pig);	IPR000594; IPR016040; IPR023318; IPR014929;	THIF-type NAD/FAD binding fold; NAD(P)-binding domain; Ubiquitin activating enzyme, alpha domain; E2 binding;
F1SFQ4	Uncharacterized protein	0.594867	Down	0.000263	PCBP2	Poly(rC)-binding protein 2 OS=Homo sapiens GN=PCBP2 PE=1 SV=1	Poly(rC)-binding protein 2 OS=Mus musculus GN=Pcbp2 PE=1 SV=1	37.23	cytoskeleton			organic cyclic compound binding; heterocyclic compound binding; RNA binding; binding; nucleic acid binding;	K13162			IPR004087; IPR004088;	K Homology domain; K Homology domain, type 1;
F1SFR2	Uncharacterized protein	2.2975	Up	0.000453	PFDN5	Prefoldin subunit 5 OS=Homo sapiens GN=PFDN5 PE=1 SV=2	Prefoldin subunit 5 OS=Mus musculus GN=Pfdn5 PE=1 SV=1	17.964	cytoplasm	protein folding; cellular process;	prefoldin complex; macromolecular complex; protein complex;	protein binding; unfolded protein binding; binding;	K04797
F1SFU1	Uncharacterized protein	1.84772	Up	0.000237	PHF23	PHD finger protein 23 OS=Homo sapiens GN=PHF23 PE=1 SV=1	PHD finger protein 23 OS=Mus musculus GN=Phf23 PE=2 SV=2	42.532	nucleus			cation binding; metal ion binding; protein binding; zinc ion binding; transition metal ion binding; binding; ion binding;				IPR013083; IPR001965; IPR011011; IPR019787;	Zinc finger, RING/FYVE/PHD-type; Zinc finger, PHD-type; Zinc finger, FYVE/PHD-type; Zinc finger, PHD-finger;
F1SFY2	Uncharacterized protein	1.79719	Up	0.000533	NAV2	Neuron navigator 2 OS=Homo sapiens GN=NAV2 PE=1 SV=3	Protein Nav2 OS=Mus musculus GN=Nav2 PE=2 SV=1	86.058	nucleus			ATP binding; nucleoside phosphate binding; nucleoside binding; ion binding; nucleotide binding; organic cyclic compound binding; heterocyclic compound binding; ribonucleoside binding; carbohydrate derivative binding; ribonucleotide binding; binding; purine ribonucleoside binding; anion binding; purine ribonucleotide binding; adenyl ribonucleotide binding; adenyl nucleotide binding; purine nucleos…	K19483			IPR003593; IPR003959; IPR027417;	AAA+ ATPase domain; ATPase, AAA-type, core; P-loop containing nucleoside triphosphate hydrolase;
F1SG10	Uncharacterized protein	0.65398	Down	0.0447	PRPS2	Ribose-phosphate pyrophosphokinase 2 OS=Homo sapiens GN=PRPS2 PE=1 SV=2	Ribose-phosphate pyrophosphokinase 2 OS=Mus musculus GN=Prps2 PE=1 SV=4	34.783	cyto_nucl	nucleoside metabolic process; nucleotide biosynthetic process; cellular aromatic compound metabolic process; nucleotide metabolic process; single-organism process; biosynthetic process; ribonucleoside monophosphate biosynthetic process; cellular metabolic process; phosphate-containing compound metabolic process; organic substance metabolic process; metabolic process; heterocycle metabolic process…		magnesium ion binding; ribose phosphate diphosphokinase activity; catalytic activity; binding; ion binding; metal ion binding; cation binding; diphosphotransferase activity; transferase activity; transferase activity, transferring phosphorus-containing groups;	K00948	PRPS; ribose-phosphate pyrophosphokinase [EC:2.7.6.1]	ssc00230 Purine metabolism - Sus scrofa (pig); ssc00030 Pentose phosphate pathway - Sus scrofa (pig); ssc01200 Carbon metabolism - Sus scrofa (pig); ssc01230 Biosynthesis of amino acids - Sus scrofa (pig); ssc01100 Metabolic pathways - Sus scrofa (pig);	IPR000836; IPR029099; IPR029057;	Phosphoribosyltransferase domain; Ribose-phosphate pyrophosphokinase, N-terminal domain; Phosphoribosyltransferase-like;
F1SG38	"Thioredoxin reductase 1, cytoplasmic"	2.4261	Up	0.000483	TXNRD1			54.838	cytoplasm	regulation of cellular process; homeostatic process; regulation of biological quality; metabolic process; regulation of biological process; oxidation-reduction process; single-organism metabolic process; cell redox homeostasis; single-organism cellular process; cellular homeostasis; single-organism process; cellular process; biological regulation;		oxidoreductase activity, acting on NAD(P)H; nucleoside phosphate binding; flavin adenine dinucleotide binding; thioredoxin-disulfide reductase activity; ion binding; antioxidant activity; nucleotide binding; oxidoreductase activity, acting on a sulfur group of donors, NAD(P) as acceptor; cofactor binding; oxidoreductase activity; disulfide oxidoreductase activity; heterocyclic compound binding; o…	K00384	trxB; thioredoxin reductase (NADPH) [EC:1.8.1.9]	ssc00450 Selenocompound metabolism - Sus scrofa (pig); ssc00240 Pyrimidine metabolism - Sus scrofa (pig);	IPR016156; IPR004099; IPR023753;	FAD/NAD-linked reductase, dimerisation domain; Pyridine nucleotide-disulphide oxidoreductase, dimerisation domain; FAD/NAD(P)-binding domain;
F1SG40	Uncharacterized protein	0.626889	Down	0.00933	---	WASH complex subunit 7 OS=Homo sapiens GN=KIAA1033 PE=1 SV=2	WASH complex subunit 7 OS=Mus musculus GN=Kiaa1033 PE=2 SV=2	106.7	cytoplasm				K18465	MRT43; WASH complex subunit 7	ssc04144 Endocytosis - Sus scrofa (pig);	IPR028283; IPR028282; IPR028191;	WASH complex subunit 7, C-terminal; WASH complex subunit 7, central domain; WASH complex subunit 7, N-terminal;
F1SG66	Interferon-induced GTP-binding protein Mx2	0.407355	Down	0.00794	MX2			80.443	cytoplasm			nucleoside phosphate binding; nucleoside binding; ion binding; hydrolase activity, acting on acid anhydrides; hydrolase activity; nucleotide binding; nucleoside-triphosphatase activity; organic cyclic compound binding; heterocyclic compound binding; ribonucleoside binding; carbohydrate derivative binding; pyrophosphatase activity; catalytic activity; ribonucleotide binding; binding; GTPase activi…				IPR030381; IPR003130; IPR020850; IPR027417; IPR001401; IPR000375;	Dynamin-type guanine nucleotide-binding (G) domain; Dynamin GTPase effector; GTPase effector domain; P-loop containing nucleoside triphosphate hydrolase; Dynamin, GTPase domain; Dynamin central domain;
F1SGC5	Uncharacterized protein	0.572707	Down	0.0016	---	Ubiquitin carboxyl-terminal hydrolase 13 OS=Homo sapiens GN=USP13 PE=1 SV=2	Ubiquitin carboxyl-terminal hydrolase OS=Mus musculus GN=Usp13 PE=2 SV=1	49.416	cytoplasm	modification-dependent macromolecule catabolic process; protein modification by small protein removal; cellular macromolecule catabolic process; proteolysis involved in cellular protein catabolic process; cellular protein catabolic process; modification-dependent protein catabolic process; cellular protein metabolic process; ubiquitin-dependent protein catabolic process; protein modification by s…		peptidase activity; thiol-dependent ubiquitinyl hydrolase activity; catalytic activity; binding; ubiquitin-like protein-specific protease activity; ubiquitinyl hydrolase activity; peptidase activity, acting on L-amino acid peptides; cysteine-type peptidase activity; hydrolase activity; protein binding;				IPR015940; IPR028889; IPR001394; IPR009060;	Ubiquitin-associated domain; Ubiquitin specific protease domain; Peptidase C19, ubiquitin carboxyl-terminal hydrolase; UBA-like;
F1SGD1	Uncharacterized protein	0.653837	Down	0.00288	DNM1L	Dynamin-1-like protein OS=Homo sapiens GN=DNM1L PE=1 SV=2	Dynamin-1-like protein OS=Mus musculus GN=Dnm1l PE=2 SV=1	69.445	cytoplasm			nucleoside phosphate binding; nucleoside binding; ion binding; hydrolase activity, acting on acid anhydrides; hydrolase activity; nucleotide binding; nucleoside-triphosphatase activity; organic cyclic compound binding; heterocyclic compound binding; ribonucleoside binding; carbohydrate derivative binding; pyrophosphatase activity; catalytic activity; ribonucleotide binding; binding; GTPase activi…	K17065	DNM1L; dynamin 1-like protein [EC:3.6.5.5]	ssc04668 TNF signaling pathway - Sus scrofa (pig); ssc04621 NOD-like receptor signaling pathway - Sus scrofa (pig);	IPR030381; IPR003130; IPR027417; IPR001401; IPR020850; IPR000375;	Dynamin-type guanine nucleotide-binding (G) domain; Dynamin GTPase effector; P-loop containing nucleoside triphosphate hydrolase; Dynamin, GTPase domain; GTPase effector domain; Dynamin central domain;
F1SGE3	Uncharacterized protein	0.291821	Down	0.0446	IGFBP6	Insulin-like growth factor-binding protein 6 OS=Homo sapiens GN=IGFBP6 PE=1 SV=1	Insulin-like growth factor-binding protein 6 OS=Mus musculus GN=Igfbp6 PE=2 SV=2	25.172	extracellular	regulation of cell growth; regulation of cellular process; regulation of biological process; regulation of growth; regulation of cellular component organization; biological regulation;	extracellular region;	insulin-like growth factor binding; protein binding; growth factor binding; binding;				IPR000716; IPR000867; IPR009030;	Thyroglobulin type-1; Insulin-like growth factor-binding protein, IGFBP; Growth factor receptor cysteine-rich domain;
F1SGE5	Uncharacterized protein	0.560418	Down	0.00199	CSAD	Cysteine sulfinic acid decarboxylase OS=Homo sapiens GN=CSAD PE=1 SV=2	Cysteine sulfinic acid decarboxylase OS=Mus musculus GN=Csad PE=2 SV=1	56.494	cyto_nucl	metabolic process; single-organism metabolic process; small molecule metabolic process; single-organism cellular process; carboxylic acid metabolic process; single-organism process; organic acid metabolic process; cellular metabolic process; cellular process; oxoacid metabolic process; organic substance metabolic process;		organic cyclic compound binding; heterocyclic compound binding; catalytic activity; binding; carbon-carbon lyase activity; ion binding; carboxy-lyase activity; lyase activity; anion binding; cofactor binding; pyridoxal phosphate binding;	K01594	CSAD; sulfinoalanine decarboxylase [EC:4.1.1.29]	ssc00430 Taurine and hypotaurine metabolism - Sus scrofa (pig); ssc01100 Metabolic pathways - Sus scrofa (pig);	IPR015424; IPR015421; IPR015422;	Pyridoxal phosphate-dependent transferase; Pyridoxal phosphate-dependent transferase, major region, subdomain 1; Pyridoxal phosphate-dependent transferase, major region, subdomain 2;
F1SGF1	Uncharacterized protein	0.593954	Down	0.000329	---	26S proteasome non-ATPase regulatory subunit 6 OS=Homo sapiens GN=PSMD6 PE=1 SV=1	26S proteasome non-ATPase regulatory subunit 6 OS=Mus musculus GN=Psmd6 PE=1 SV=1	33.641	cytoplasm			protein binding; binding;	K03037	PSMD6; 26S proteasome regulatory subunit N7	ssc05169 Epstein-Barr virus infection - Sus scrofa (pig); ssc03050 Proteasome - Sus scrofa (pig);	IPR011990;	Tetratricopeptide-like helical domain;
F1SGG2	Uncharacterized protein	1.73268	Up	0.0224	KRT8	"Keratin, type II cytoskeletal 8 OS=Homo sapiens GN=KRT8 PE=1 SV=7"	"Keratin, type II cytoskeletal 8 OS=Mus musculus GN=Krt8 PE=1 SV=4"	54.426	nucleus		intracellular organelle; polymeric cytoskeletal fiber; intracellular non-membrane-bounded organelle; cytoskeletal part; intracellular organelle part; supramolecular fiber; intracellular part; cell; supramolecular complex; keratin filament; organelle part; supramolecular polymer; non-membrane-bounded organelle; organelle; cytoskeleton; intermediate filament cytoskeleton; intracellular; cell part; …	structural molecule activity;	K07605			IPR032444;	Keratin type II head;
F1SGN8	GMP reductase	0.573265	Down	0.00155	GMPR2			37.962	cytoplasm	cellular aromatic compound metabolic process; oxidation-reduction process; nucleotide metabolic process; small molecule metabolic process; single-organism cellular process; nitrogen compound metabolic process; organic cyclic compound metabolic process; single-organism process; primary metabolic process; cellular metabolic process; phosphate-containing compound metabolic process; organic substance…	macromolecular complex; GMP reductase complex; catalytic complex; cell; cell part; oxidoreductase complex;	oxidoreductase activity, acting on NAD(P)H; GMP reductase activity; catalytic activity; oxidoreductase activity, acting on NAD(P)H, nitrogenous group as acceptor; oxidoreductase activity;	K00364	E1.7.1.7; GMP reductase [EC:1.7.1.7]	ssc00230 Purine metabolism - Sus scrofa (pig);	IPR001093; IPR013785;	IMP dehydrogenase/GMP reductase; Aldolase-type TIM barrel;
F1SGR7	Uncharacterized protein	0.663434	Down	0.00392	KHNYN	Protein KHNYN OS=Homo sapiens GN=KHNYN PE=2 SV=3	Protein KHNYN OS=Mus musculus GN=Khnyn PE=2 SV=2	73.946	cyto_nucl							IPR021869;	Ribonuclease Zc3h12a-like, NYN domain;
F1SGS9	Catalase	1.99925	Up	0.00403	CAT			59.929	cytoplasm	metabolic process; response to stress; oxidation-reduction process; single-organism metabolic process; response to oxidative stress; single-organism process; response to stimulus;		organic cyclic compound binding; heterocyclic compound binding; heme binding; catalytic activity; binding; antioxidant activity; catalase activity; peroxidase activity; tetrapyrrole binding; oxidoreductase activity; oxidoreductase activity, acting on peroxide as acceptor;	K03781	katE; catalase [EC:1.11.1.6]	ssc04213 Longevity regulating pathway - multiple species - Sus scrofa (pig); ssc04068 FoxO signaling pathway - Sus scrofa (pig); ssc00630 Glyoxylate and dicarboxylate metabolism - Sus scrofa (pig); ssc05014 Amyotrophic lateral sclerosis (ALS) - Sus scrofa (pig); ssc04146 Peroxisome - Sus scrofa (pig); ssc00380 Tryptophan metabolism - Sus scrofa (pig); ssc01200 Carbon metabolism - Sus scrofa (pig)…	IPR020835; IPR011614; IPR010582;	Catalase-like domain; Catalase core domain; Catalase immune-responsive domain;
F1SGT2	Methylthioribulose-1-phosphate dehydratase	2.4059	Up	7.89e-05	APIP			27.179	cytoplasm	sulfur amino acid biosynthetic process; organic acid biosynthetic process; L-methionine salvage from methylthioadenosine; aspartate family amino acid metabolic process; single-organism process; biosynthetic process; organonitrogen compound biosynthetic process; cellular metabolic process; sulfur amino acid metabolic process; sulfur compound biosynthetic process; organic substance metabolic proces…	intracellular part; cell; cell part; intracellular; cytoplasm;	metal ion binding; cation binding; binding; ion binding;	K08964	mtnB; methylthioribulose-1-phosphate dehydratase [EC:4.2.1.109]	ssc00270 Cysteine and methionine metabolism - Sus scrofa (pig); ssc01100 Metabolic pathways - Sus scrofa (pig);	IPR001303;	Class II aldolase/adducin N-terminal;
F1SGT5	Uncharacterized protein	0.604718	Down	0.00221	NOVA1	RNA-binding protein Nova-1 OS=Homo sapiens GN=NOVA1 PE=1 SV=1	RNA-binding protein Nova-1 OS=Mus musculus GN=Nova1 PE=1 SV=2	42.223	cyto_nucl			organic cyclic compound binding; heterocyclic compound binding; RNA binding; binding; nucleic acid binding;	K14944			IPR004087; IPR004088;	K Homology domain; K Homology domain, type 1;
F1SGV6	Uncharacterized protein	0.582245	Down	0.000158	DSCR3	Down syndrome critical region protein 3 OS=Homo sapiens GN=DSCR3 PE=2 SV=1	Down syndrome critical region protein 3 homolog OS=Mus musculus GN=Dscr3 PE=2 SV=1	32.913	cytoplasm							IPR014756;	Immunoglobulin E-set;
F1SGW7	Uncharacterized protein	2.59065	Up	0.00997	AMIGO2	Amphoterin-induced protein 2 OS=Homo sapiens GN=AMIGO2 PE=1 SV=1	Amphoterin-induced protein 2 OS=Mus musculus GN=Amigo2 PE=1 SV=1	58.271	extr_plas			protein binding; binding;				IPR003598; IPR007110; IPR000483; IPR013783; IPR003599; IPR032675; IPR013151;	Immunoglobulin subtype 2; Immunoglobulin-like domain; Cysteine-rich flanking region, C-terminal; Immunoglobulin-like fold; Immunoglobulin subtype; Leucine-rich repeat domain, L domain-like; Immunoglobulin;
F1SGX1	Uncharacterized protein	1.98099	Up	0.000831	CHAF1B	Chromatin assembly factor 1 subunit B OS=Homo sapiens GN=CHAF1B PE=1 SV=1	Chromatin assembly factor 1 subunit B OS=Mus musculus GN=Chaf1b PE=2 SV=1	61.141	nucleus			protein binding; binding;	K10751			IPR017986; IPR015943; IPR029129; IPR001632;	WD40-repeat-containing domain; WD40/YVTN repeat-like-containing domain; Chromatin assembly factor 1 subunit B, C-terminal domain; G-protein, beta subunit;
F1SGX5	Uncharacterized protein	0.532367	Down	0.0031	RUNX1	Runt-related transcription factor 1 OS=Homo sapiens GN=RUNX1 PE=1 SV=3	"Runt related transcription factor 1, isoform CRA_c OS=Mus musculus GN=Runx1 PE=4 SV=1"	49.608	nucleus	regulation of cellular process; regulation of gene expression; regulation of transcription, DNA-templated; regulation of cellular biosynthetic process; regulation of primary metabolic process; regulation of macromolecule metabolic process; regulation of nucleobase-containing compound metabolic process; regulation of macromolecule biosynthetic process; regulation of cellular metabolic process; reg…	organelle; intracellular membrane-bounded organelle; intracellular organelle; nucleus; cell part; intracellular; intracellular part; membrane-bounded organelle; cell;	DNA binding; ATP binding; nucleoside phosphate binding; nucleoside binding; ion binding; nucleotide binding; transcription factor activity, sequence-specific DNA binding; heterocyclic compound binding; organic cyclic compound binding; ribonucleoside binding; carbohydrate derivative binding; ribonucleotide binding; binding; nucleic acid binding transcription factor activity; nucleic acid binding; …	K08367	RUNX1; runt-related transcription factor 1	ssc04530 Tight junction - Sus scrofa (pig); ssc05202 Transcriptional misregulation in cancer - Sus scrofa (pig); ssc05220 Chronic myeloid leukemia - Sus scrofa (pig); ssc04659 Th17 cell differentiation - Sus scrofa (pig); ssc05221 Acute myeloid leukemia - Sus scrofa (pig); ssc05200 Pathways in cancer - Sus scrofa (pig);	IPR013524; IPR012346; IPR027384; IPR008967; IPR013711;	Runt domain; p53/RUNT-type transcription factor, DNA-binding domain; Runx, central domain; p53-like transcription factor, DNA-binding; Runx, C-terminal domain;
F1SGZ8	Uncharacterized protein	1.50154	Up	0.0305	TWF1	Twinfilin-1 OS=Homo sapiens GN=TWF1 PE=1 SV=3	Twinfilin-1 OS=Mus musculus GN=Twf1 PE=1 SV=2	40.266	cytoplasm		cell; intracellular; cell part;	actin binding; protein binding; cytoskeletal protein binding; binding;	K08870			IPR029006; IPR002108;	ADF-H/Gelsolin-like domain; Actin-depolymerising factor homology domain;
F1SH04	Uncharacterized protein	2.13473	Up	0.00015	PPHLN1	Periphilin-1 OS=Homo sapiens GN=PPHLN1 PE=1 SV=2	"Periphilin 1, isoform CRA_a OS=Mus musculus GN=Pphln1 PE=4 SV=1"	42.183	cytoplasm
F1SH12	Uncharacterized protein	1.80908	Up	0.00537	---	Fibronectin type III domain-containing protein 3B OS=Homo sapiens GN=FNDC3B PE=1 SV=2	Fibronectin type III domain-containing protein 3B OS=Mus musculus GN=Fndc3b PE=1 SV=1	83.784	cytoplasm			protein binding; binding;				IPR013783; IPR003961;	Immunoglobulin-like fold; Fibronectin type III;
F1SH28	Protein kinase C	0.624302	Down	0.00738	PRKCI			59.687	cytoplasm	regulation of cellular process; single organism signaling; cellular response to stimulus; phosphorylation; intracellular signal transduction; cellular protein metabolic process; single-organism process; signaling; response to stimulus; primary metabolic process; cellular metabolic process; phosphate-containing compound metabolic process; organic substance metabolic process; signal transduction; m…		ATP binding; nucleoside phosphate binding; phosphotransferase activity, alcohol group as acceptor; nucleoside binding; ion binding; protein binding; nucleotide binding; protein kinase activity; organic cyclic compound binding; heterocyclic compound binding; ribonucleoside binding; carbohydrate derivative binding; kinase activity; ribonucleotide binding; catalytic activity; binding; purine ribonuc…	K06069	PRKCI; atypical protein kinase C iota type [EC:2.7.11.13]	ssc04144 Endocytosis - Sus scrofa (pig); ssc04910 Insulin signaling pathway - Sus scrofa (pig); ssc04611 Platelet activation - Sus scrofa (pig); ssc04530 Tight junction - Sus scrofa (pig); ssc04015 Rap1 signaling pathway - Sus scrofa (pig); ssc04390 Hippo signaling pathway - Sus scrofa (pig);	IPR000270; IPR002219; IPR000719; IPR020454; IPR011009; IPR017892; IPR000961;	PB1 domain; Protein kinase C-like, phorbol ester/diacylglycerol-binding domain; Protein kinase domain; Diacylglycerol/phorbol-ester binding; Protein kinase-like domain; Protein kinase, C-terminal; AGC-kinase, C-terminal;
F1SH61	Uncharacterized protein	1.53245	Up	0.0333	---	Carboxypeptidase M OS=Homo sapiens GN=CPM PE=1 SV=2	Carboxypeptidase M OS=Mus musculus GN=Cpm PE=2 SV=2	14.788	cytoplasm							IPR008969; IPR014766;	Carboxypeptidase-like, regulatory domain; Carboxypeptidase, regulatory domain;
F1SHC1	Tubulin alpha chain	0.612429	Down	0.00334	TUBA1C			49.927	cytoskeleton	microtubule-based process; cellular process;	intracellular organelle; polymeric cytoskeletal fiber; microtubule; intracellular non-membrane-bounded organelle; cytoskeletal part; intracellular organelle part; supramolecular fiber; intracellular part; cell; supramolecular complex; organelle part; supramolecular polymer; non-membrane-bounded organelle; organelle; cytoskeleton; microtubule cytoskeleton; intracellular; cell part;	nucleoside phosphate binding; nucleoside binding; ion binding; hydrolase activity, acting on acid anhydrides; hydrolase activity; nucleotide binding; nucleoside-triphosphatase activity; organic cyclic compound binding; heterocyclic compound binding; ribonucleoside binding; carbohydrate derivative binding; pyrophosphatase activity; catalytic activity; structural constituent of cytoskeleton; ribonu…	K07374	TUBA; tubulin alpha	ssc04540 Gap junction - Sus scrofa (pig); ssc04145 Phagosome - Sus scrofa (pig); ssc04530 Tight junction - Sus scrofa (pig); ssc04210 Apoptosis - Sus scrofa (pig);	IPR003008; IPR023123; IPR008280; IPR018316;	Tubulin/FtsZ, GTPase domain; Tubulin, C-terminal; Tubulin/FtsZ, C-terminal; Tubulin/FtsZ, 2-layer sandwich domain;
F1SHG3	Uncharacterized protein	0.651556	Down	0.00396	COMMD9	COMM domain-containing protein 9 OS=Homo sapiens GN=COMMD9 PE=1 SV=2	COMM domain-containing protein 9 OS=Mus musculus GN=Commd9 PE=2 SV=3	21.72	nucleus							IPR017920;	COMM domain;
F1SHH7	Uncharacterized protein	1.94567	Up	5.78e-05	API5	Apoptosis inhibitor 5 OS=Homo sapiens GN=API5 PE=1 SV=3	Apoptosis inhibitor 5 OS=Mus musculus GN=Api5 PE=1 SV=2	59.067	cytoplasm			binding;				IPR011989; IPR016024;	Armadillo-like helical; Armadillo-type fold;
F1SHL9	Pyruvate kinase	0.545836	Down	0.00201	PKM			58.722	cytoplasm	ATP generation from ADP; nucleoside metabolic process; purine nucleoside metabolic process; nucleoside diphosphate phosphorylation; ADP metabolic process; pyridine nucleotide metabolic process; glycolytic process; purine ribonucleoside monophosphate metabolic process; nucleotide metabolic process; single-organism process; ribonucleoside diphosphate metabolic process; nucleotide phosphorylation; p…		magnesium ion binding; pyruvate kinase activity; phosphotransferase activity, alcohol group as acceptor; catalytic activity; binding; ion binding; potassium ion binding; metal ion binding; cation binding; alkali metal ion binding; transferase activity; transferase activity, transferring phosphorus-containing groups;	K00873	PK; pyruvate kinase [EC:2.7.1.40]	ssc00620 Pyruvate metabolism - Sus scrofa (pig); ssc05230 Central carbon metabolism in cancer - Sus scrofa (pig); ssc00230 Purine metabolism - Sus scrofa (pig); ssc04922 Glucagon signaling pathway - Sus scrofa (pig); ssc04930 Type II diabetes mellitus - Sus scrofa (pig); ssc00010 Glycolysis / Gluconeogenesis - Sus scrofa (pig); ssc05203 Viral carcinogenesis - Sus scrofa (pig); ssc01200 Carbon met…	IPR015794; IPR011037; IPR015813; IPR015806; IPR015795; IPR015793;	Pyruvate kinase, alpha/beta; Pyruvate kinase-like, insert domain; Pyruvate/Phosphoenolpyruvate kinase-like domain; Pyruvate kinase, beta-barrel insert domain; Pyruvate kinase, C-terminal; Pyruvate kinase, barrel;
F1SHP0	Uncharacterized protein	0.389517	Down	0.00498	ADAMTS5	A disintegrin and metalloproteinase with thrombospondin motifs 5 OS=Homo sapiens GN=ADAMTS5 PE=1 SV=2	A disintegrin and metalloproteinase with thrombospondin motifs 5 OS=Mus musculus GN=Adamts5 PE=2 SV=2	101.77	extracellular	proteolysis; metabolic process; macromolecule metabolic process; protein metabolic process; primary metabolic process; organic substance metabolic process;	extracellular matrix; extracellular region part; extracellular region; proteinaceous extracellular matrix;	endopeptidase activity; metalloendopeptidase activity; peptidase activity; transition metal ion binding; catalytic activity; binding; ion binding; cation binding; metal ion binding; peptidase activity, acting on L-amino acid peptides; hydrolase activity; metallopeptidase activity; zinc ion binding;	K08620			IPR024079; IPR002870; IPR010294; IPR006586; IPR001590;	Metallopeptidase, catalytic domain; Peptidase M12B, propeptide; ADAM-TS Spacer 1; ADAM, cysteine-rich; Peptidase M12B, ADAM/reprolysin;
F1SHQ6	Uncharacterized protein	1.67538	Up	0.0127	PEX26	Peroxisome assembly protein 26 OS=Homo sapiens GN=PEX26 PE=1 SV=2	Peroxisome assembly protein 26 OS=Mus musculus GN=Pex26 PE=2 SV=2	33.205	cytoplasm	intracellular transport; cellular component organization; establishment of protein localization to organelle; peroxisomal membrane transport; protein import; single-organism process; establishment of protein localization to peroxisome; protein transport; establishment of localization; peroxisome organization; protein targeting; protein targeting to membrane; establishment of localization in cell;…	membrane; intracellular organelle; microbody membrane; intrinsic component of peroxisomal membrane; peroxisomal part; bounding membrane of organelle; organelle membrane; peroxisome; cytoplasm; intracellular organelle part; intrinsic component of membrane; microbody part; intracellular part; cell; integral component of membrane; organelle part; peroxisomal membrane; organelle; intracellular membra…	protein binding; binding; protein complex binding; macromolecular complex binding;	K13340	PEX26; peroxin-26	ssc04146 Peroxisome - Sus scrofa (pig);
F1SI09	Uncharacterized protein	0.537158	Down	0.00438	PPP1R7	Protein phosphatase 1 regulatory subunit 7 OS=Homo sapiens GN=PPP1R7 PE=1 SV=1	Protein phosphatase 1 regulatory subunit 7 OS=Mus musculus GN=Ppp1r7 PE=1 SV=2	41.395	cytoplasm			protein binding; binding;	K17550			IPR032675;	Leucine-rich repeat domain, L domain-like;
F1SI13	Uncharacterized protein	1.89712	Up	0.0157	---	Peptidyl-prolyl cis-trans isomerase FKBP3 OS=Homo sapiens GN=FKBP3 PE=1 SV=1	Peptidyl-prolyl cis-trans isomerase FKBP3 OS=Mus musculus GN=Fkbp3 PE=1 SV=2	13.477	cytoplasm				K09570			IPR001179;	FKBP-type peptidyl-prolyl cis-trans isomerase domain;
[truncated: 734 more rows]

## Sheet: HvsA
Protein accession	Protein description (pig)	H/A Ratio	Regulated Type	H/A P value	Gene name	Protein description (human)	Protein description (mouse)	MW [kDa]	Subcellular localization	Biological Process	Cellular Component	Molecular Function	KEGG KO No.	KEGG Gene	KEGG pathway	IPR ID	Domain description
[truncated: 1,454 more rows]

[truncated: 1 more sheets: AvsSA]
