# Supplementary material for: Integrative proteomic and phosphoproteomic analysis of granulosa cells during follicular atresia in porcine
Source: bioRxiv preprint, doi:10.1101/2020.08.31.276436, version 1 (2020-09-01)
Supplement: Supplemental Data [file 276436_file03.zip › Supplemental Data/Table S3--MS_identified_information-Phosphoproteomic.xlsx]

## Sheet: Summary
Header line description of table 1			Table 1. MS/MS spetrum database search analysis summary
Identified modified proteins	Number of proteins detected by spetrum search analysis
Quantifiable modified proteins	Number of proteins quantifiable		Identified modified proteins	Quantifiable modified proteins	Identified modification sites	Quantifiable modification sites
Identified modification sites	Number of modification sites detected by spetrum search analysis		2830	1760	6839	4723
Quantifiable modification sites	Number of modification sites quantifiable
Header line description of worksheet "repeat1-3"			Table 2. Differentially modified modification sites and modified proteins summary (Filtered whith threshold value of expression fold change and P value < 0.05)
Protein accession	Protein accession number of database used for search
Position	Modification site localization in protein		Compare group	Regulated type	fold change >1.5
Amino acid	The amino acid that modification site modified		A/SA	up-regulated sites	3
Protein description	Protein functional description			up-regulated proteins	3
Gene name	Indicates the name of the gene that code for the protein sequence			down-regulated sites	6
Localization probability	Probability of a certain amino acid containing this modification in this peptide			down-regulated proteins	5
PEP	The maximal posterior error probability for peptides, which is the probability of each peptide to be a false hit considering identification score and peptide length		H/A	up-regulated sites	1822
Score	A simple rule to be used to judge whether a result is significant or not			up-regulated proteins	833
Modified sequence	Identified peptide sequence marked with modification sites localization probabilities			down-regulated sites	26
Charge	Carried charge of peptide			down-regulated proteins	23
Mass error [ppm]	Parts per million ratio of peptide mass error between the theory and practice		H/SA	up-regulated sites	1739
MS/MS Count	Number of spectrum matched with peptide			up-regulated proteins	799
				down-regulated sites	28
				down-regulated proteins	24

## Sheet: Combine
Identified Phosphorylation Protein information							Relative intensity(phosphorylation protein)									Relative intensity(total protein)									Normalized with total protein									Quantitation of samples
Protein accession	Position	Amino acid	Protein description(pig)	Protein description(human)	Protein description(mouse)	Gene name	A1	A2	A3	H1	H2	H3	SA1	SA2	SA3	A1	A2	A3	H1	H2	H3	SA1	SA2	SA3	A1	A2	A3	H1	H2	H3	SA1	SA2	SA3	H/SA Ratio	H/SA P value	H/A Ratio	H/A P value	A/SA Ratio	A/SA P value
A0A140TAL1	657	S	Large proline-rich protein BAG6 (Fragment)			BAG6	0.681			1.667			0.741
A4UTP7	386	S	Myocyte-specific enhancer factor 2C			MEF2C	0.666	0.692		1.685	1.739		0.739	0.687
A4UTP7	220	S	Myocyte-specific enhancer factor 2C			MEF2C	0.797	0.67		1.425	1.687		0.839	0.75
A5A8X7	330	S	Pre-B-cell leukemia transcription factor 2			PBX2	0.793	0.7	0.786	1.424	1.567	1.312	0.843	0.822	0.921	1.09758			0.803357			1.03983			0.722498			1.77256			0.810709			2.18643		2.45338		0.891193
A5A8X7	151	S	Pre-B-cell leukemia transcription factor 2			PBX2										1.09758			0.803357			1.03983
A5D9J7	719	S	Transporter 2, ATP-binding cassette, sub-family B (MDR/TAP)			TAP2	0.704	0.726	0.811	1.681	1.643	1.349	0.707	0.736	0.864
A5D9P0	38	S	Ring finger protein 1			RING1	0.752	0.717	0.779	1.615	1.571	1.463	0.718	0.802	0.787	1.00147	1.01183	1.08767	0.853229	0.974702	0.919122	1.10329	1.01972	1.00996	0.750899	0.708616	0.716208	1.89281	1.61177	1.59174	0.650781	0.786489	0.779239	2.29926	0.00384632	2.34236	0.00888025	0.981599	0.791549
A5GFQ6	17	S	Glycine N-methyltransferase			GNMT	0.766			1.44			0.855
A5GFQ9	598	S	Protein phosphatase 2, regulatory subunit B (B56), delta isoform			PPP2R5D	0.809			1.361			0.882			1.1609	1.16551	1.06158	0.748235	0.798465	0.861489	1.08735	1.03986	1.10795	0.696874			1.81895			0.811149			2.24243		2.61015		0.859119
A5GFQ9	573	S	Protein phosphatase 2, regulatory subunit B (B56), delta isoform			PPP2R5D	0.458	0.435	0.35	2.089	2.224	2.284	0.585	0.524	0.419	1.1609	1.16551	1.06158	0.748235	0.798465	0.861489	1.08735	1.03986	1.10795	0.394522	0.373227	0.329697	2.7919	2.78534	2.65122	0.538007	0.503915	0.378174	5.79431	4.63203e-06	7.49784	5.35054e-05	0.772796	0.145319
A5GFS6	244	S	Nuclear factor of activated T-cells, cytoplasmic, calcineurin-dependent 2			NFATC2	1.209			0.931			0.883				1.27626			0.610361			1.09054
A5GFS6	354	S	Nuclear factor of activated T-cells, cytoplasmic, calcineurin-dependent 2			NFATC2	0.897	0.902	1.071	1.287	1.304	1.052	0.865	0.852	0.901		1.27626			0.610361			1.09054			0.706754			2.13644			0.781266		2.73459		3.02289		0.904627
A5GFS8	158	S	Vesicle-associated membrane protein-associated protein B			VAPB	0.395	0.383		2.275	2.223		0.484	0.575		0.892662	0.89196	0.992306	1.14035	1.20463	1.03041	0.974207	0.898673	0.99639	0.442497	0.429391		1.995	1.84538		0.496814	0.639832		3.37869	0.00585509	4.40467	0.0308359	0.767071	0.313276
A5GFS8	164	T	Vesicle-associated membrane protein-associated protein B			VAPB	0.479			2.124			0.536			0.892662	0.89196	0.992306	1.14035	1.20463	1.03041	0.974207	0.898673	0.99639	0.536597			1.86259			0.550191			3.38534		3.4711		0.975293
A5GFU6	337	S	GNAS complex locus			GNAS	0.891		0.858	1.049		1.201	1.073		0.957	1.08417	1.08685	1.11553	0.666983	0.775452	0.729498	1.20261	1.13786	1.1605	0.821824		0.769143	1.57275		1.64634	0.892224		0.824646	1.87498	0.0045259	2.02335	0.00471627	0.926667	0.286454
A5GFZ6	329	S	Adenylyltransferase and sulfurtransferase MOCS3			MOCS3	0.905		0.933	1.125		1.004	0.995		1.07	1.1029	1.09634	1.04229	0.647115	0.94952	0.831394	1.2288	0.956263	1.11925	0.820567		0.895146	1.73848		1.20761	0.809734		0.956	1.66848	0.251161	1.71713	0.253968	0.971671	0.797789
A5GFZ7	420	S	Uncharacterized protein	Zinc finger protein 217 OS=Homo sapiens GN=ZNF217 PE=1 SV=1	Zinc finger protein 536 OS=Mus musculus GN=Znf536 PE=2 SV=1	ZNF217	0.635	0.674	0.758	1.645	1.533	1.447	0.8	0.874	0.821
A5GHK3	125	S	Prefoldin subunit 4			PFDN4										0.697996	0.716557	0.459648	1.55941	1.39183	1.98548	0.734926	0.914115	0.512149
A5GHK7	98	S	Activity-dependent neuroprotector			ADNP										1.03645	1.03551	1.01231	0.911259	0.931934	1.0154	1.0276	1.01763	0.981312
A5GHK7	998	S	Activity-dependent neuroprotector			ADNP	0.471	0.408	0.482	2.095	2.186	1.966	0.568	0.581	0.593	1.03645	1.03551	1.01231	0.911259	0.931934	1.0154	1.0276	1.01763	0.981312	0.454438	0.394008	0.476138	2.29902	2.34566	1.93618	0.552742	0.570934	0.604293	3.80843	0.00580508	4.96825	0.00425083	0.766555	0.0148062
A8HG48	11	S	Solute carrier family 7 (Amino acid transporter light chain, y+L system), member 7 tv3			SLC7A7	1.048		1.043	0.904		1.017	1.054		0.958
A8U4R4	141	Y	Transketolase			tkt	0.549			2.104			0.489			1.00213	0.93777	0.839926	1.24531	1.0865	1.39802	0.828918	0.955057	0.724856	0.547834			1.68953			0.589926			2.86398		3.08402		0.92865
A8U4R4	287	T	Transketolase			tkt	0.778	0.672	0.8	1.411	1.562	1.363	0.869	0.852	0.86	1.00213	0.93777	0.839926	1.24531	1.0865	1.39802	0.828918	0.955057	0.724856	0.776348	0.716594	0.952465	1.13305	1.43764	0.974952	1.04835	0.892093	1.18644	1.13392	0.44141	1.44992	0.0959445	0.782057	0.111595
A8U4R4	146	S	Transketolase			tkt	0.549			2.104			0.489			1.00213	0.93777	0.839926	1.24531	1.0865	1.39802	0.828918	0.955057	0.724856	0.547834			1.68953			0.589926			2.86398		3.08402		0.92865
A9LM01	104	S	Progesterone receptor membrane component 2			PGRMC2	0.359		0.351	2.383		2.343	0.426		0.364	0.908134	0.899367	1.04231	1.1176	1.09203	0.863041	0.981828	1.01103	1.09772	0.395316		0.336753	2.13225		2.71482	0.433885		0.331597	6.33205	0.0823384	6.62106	0.0868255	0.95635	0.809298
A9LM01	90	S	Progesterone receptor membrane component 2			PGRMC2	0.891		0.84	1.254		1.342	0.898		0.845	0.908134	0.899367	1.04231	1.1176	1.09203	0.863041	0.981828	1.01103	1.09772	0.981133		0.805904	1.12205		1.55497	0.914621		0.769779	1.5893	0.236933	1.49802	0.258054	1.06093	0.697261
A9LM01	211	T	Progesterone receptor membrane component 2			PGRMC2	0.59			1.83			0.684			0.908134	0.899367	1.04231	1.1176	1.09203	0.863041	0.981828	1.01103	1.09772	0.649684			1.63744			0.69666			2.35042		2.52036		0.93257
B0FWK4	83	S	Signal peptidase complex subunit 1			SPCS1	0.893	0.815	0.87	1.208	1.227	1.089	0.935	0.996	1.05	0.645152		0.925401	1.57542		0.955762	0.797961		1.1121	1.38417		0.940133	0.766782		1.13941	1.17174		0.944163	0.900888	0.686876	0.820111	0.547602	1.09849	0.728414
B0KYV5	370	S	LIM domain and actin-binding protein 1			LIMA1	0.624			1.851			0.635
B0KYV5	486	S	LIM domain and actin-binding protein 1			LIMA1	0.445	0.532	0.523	2.169	2.045	2.058	0.529	0.583	0.471
B0KYV5	358	S	LIM domain and actin-binding protein 1			LIMA1	0.432	0.397	0.495	1.962	2.255	1.934	0.717	0.534	0.611
B0LUH2	433	S	Adipose triglyceride lipase			ATGL	0.894	0.898	0.98	1.244	1.305	1.239	0.904	0.855	0.81
B2X0A4	25	S	17-beta-hydroxysteroid dehydrogenase type 1			HSD17B1			0.75			1.316			0.949	0.969852	1.00084	0.87025	0.971555	0.990738	1.05953	1.02835	0.994587	1.01216			0.861822			1.24206			0.937596	1.32473		1.44121		0.919182
B2X0A4	274	S	17-beta-hydroxysteroid dehydrogenase type 1			HSD17B1	0.679	0.627	0.638	1.676	1.799	1.732	0.734	0.697	0.667	0.969852	1.00084	0.87025	0.971555	0.990738	1.05953	1.02835	0.994587	1.01216	0.700107	0.626476	0.733123	1.72507	1.81582	1.63469	0.713762	0.700793	0.658985	2.49601	0.00115939	2.51278	0.000257436	0.993328	0.905049
B2X0A4	36	T	17-beta-hydroxysteroid dehydrogenase type 1			HSD17B1	0.895		0.924	1.204		1.034	0.937		1.051	0.969852	1.00084	0.87025	0.971555	0.990738	1.05953	1.02835	0.994587	1.01216	0.922821		1.06176	1.23925		0.975906	0.911165		1.03837	1.13625	0.489622	1.11618	0.541062	1.01798	0.869676
B2X0A4	269	S	17-beta-hydroxysteroid dehydrogenase type 1			HSD17B1	0.769	0.712	0.719	1.47	1.57	1.462	0.826	0.808	0.843	0.969852	1.00084	0.87025	0.971555	0.990738	1.05953	1.02835	0.994587	1.01216	0.792905	0.711405	0.8262	1.51304	1.58468	1.37986	0.803226	0.812398	0.83287	1.82871	0.00683839	1.92129	0.00149982	0.951814	0.368448
B2X0A4	59	S	17-beta-hydroxysteroid dehydrogenase type 1			HSD17B1	0.827	0.777	0.917	1.232	1.382	1.105	0.977	0.902	0.993	0.969852	1.00084	0.87025	0.971555	0.990738	1.05953	1.02835	0.994587	1.01216	0.852708	0.77635	1.05372	1.26807	1.39492	1.04292	0.950063	0.906909	0.981067	1.3058	0.101	1.38137	0.0639527	0.945293	0.5999
B2X0A4	319	T	17-beta-hydroxysteroid dehydrogenase type 1			HSD17B1	0.519	0.463	0.465	2.131	2.124	2.132	0.493	0.58	0.456	0.969852	1.00084	0.87025	0.971555	0.990738	1.05953	1.02835	0.994587	1.01216	0.535133	0.462613	0.534329	2.19339	2.14386	2.01222	0.479407	0.583157	0.45052	4.19637	3.44692e-05	4.14435	0.00019565	1.01255	0.900528
B2X0A4	72	S	17-beta-hydroxysteroid dehydrogenase type 1			HSD17B1	0.871	0.812	0.883	1.219	1.23	1.194	0.947	0.995	0.941	0.969852	1.00084	0.87025	0.971555	0.990738	1.05953	1.02835	0.994587	1.01216	0.898075	0.811321	1.01465	1.25469	1.2415	1.12692	0.92089	1.00042	0.929692	1.27082	0.00942746	1.33004	0.0176937	0.955472	0.560724
B2X0A4	30	S	17-beta-hydroxysteroid dehydrogenase type 1			HSD17B1	0.796	0.78	0.725	1.42	1.488	1.448	0.844	0.812	0.849	0.969852	1.00084	0.87025	0.971555	0.990738	1.05953	1.02835	0.994587	1.01216	0.820744	0.779348	0.833094	1.46157	1.50191	1.36665	0.82073	0.816419	0.838798	1.74888	0.00338419	1.77961	0.00133878	0.98273	0.484348
B2X0A4	275	S	17-beta-hydroxysteroid dehydrogenase type 1			HSD17B1	0.592		0.571	1.779		1.733	0.725		0.726	0.969852	1.00084	0.87025	0.971555	0.990738	1.05953	1.02835	0.994587	1.01216	0.610403		0.656133	1.83109		1.63563	0.705011		0.717276	2.43743	0.0597725	2.73717	0.0456949	0.890493	0.162371
B2ZPK1	284	T	Cytochrome b reductase 1			CYBRD1	0.779	0.739	0.752	1.49	1.628	1.591	0.8	0.734	0.693		0.90302			1.12174			0.981484			0.818365			1.45132			0.747847		1.94066		1.77344		1.0943
B3TFD9	413	T	Poliovirus receptor-related 2 transcript variant delta			NECTIN2	0.439	0.452	0.526	2.243	2.255	1.992	0.471	0.484	0.529			0.781803			1.45339			0.74049			0.672804			1.37058			0.714392	1.91853		2.03712		0.941785
B3VKQ2	158	S	Iron-responsive element-binding protein 2			IREB2	0.563			1.879			0.668				1.10212	1.10062		0.847222	0.863635		1.04118	1.04392
B4YSE3	92	S	Kruppel-like factor 3			KLF3	0.716		0.605	1.728		1.846	0.656		0.592
B4YSE3	101	S	Kruppel-like factor 3			KLF3	0.665	0.665		1.687	1.542		0.737	0.873
B4YSE3	78	S	Kruppel-like factor 3			KLF3	0.766			1.47			0.829
B6CVL4	353	S	Uncharacterized protein	WD and tetratricopeptide repeats protein 1 OS=Homo sapiens GN=WDTC1 PE=1 SV=2	WD and tetratricopeptide repeats protein 1 OS=Mus musculus GN=Wdtc1 PE=1 SV=1	WDTC1			0.73			1.567			0.735	1.04804		0.999814	0.85087		0.951083	1.09252		1.04886			0.730136			1.64759			0.700762	2.35115		2.25656		1.04192
B6CVL5	92	S	High mobility group AT-hook 1 transcript variant 2			HMGA1	0.833	0.847	0.919	1.546	1.443	1.36	0.703	0.787	0.755	1.21567	1.33629	1.3306	0.587756	0.762758	0.515419	1.18	0.901163	1.09651	0.685219	0.633847	0.690663	2.63034	1.89182	2.63863	0.595764	0.873316	0.688545	3.31883	0.0141944	3.56306	0.0197072	0.931454	0.610237
B6CVL5	91	S	High mobility group AT-hook 1 transcript variant 2			HMGA1	0.77	0.797	0.813	1.602	1.519	1.557	0.713	0.771	0.67	1.21567	1.33629	1.3306	0.587756	0.762758	0.515419	1.18	0.901163	1.09651	0.633395	0.596429	0.611	2.72562	1.99146	3.02084	0.604239	0.855561	0.611027	3.73663	0.0194397	4.20351	0.0232756	0.888933	0.452084
B7UCT2	51	S	SFRS protein kinase 1			SRPK1	0.7	0.647	0.657	1.69	1.759	1.74	0.704	0.711	0.642	1.04136	0.997587	1.00787	1.02143	1.16259	0.924199	0.942575	0.858835	1.00868	0.672199	0.648565	0.651872	1.65454	1.513	1.88271	0.74689	0.827866	0.636475	2.28391	0.00441244	2.56016	0.0105667	0.892099	0.287138
B8XSK1	360	S	MAP kinase interacting serine/threonine kinase 1			MKNK1			0.773			1.417			0.835
C0SW08	251	S	Cell division cycle 2			CDC2	0.543			1.993			0.59			0.82298	0.846345	0.835336	1.46146	1.50785	1.45364	0.721221	0.645806	0.752822	0.659797			1.3637			0.818057			1.667		2.06685		0.806542
C0SW08	39	S	Cell division cycle 2			CDC2	0.701	0.678	0.645	1.659	1.608	1.713	0.727	0.808	0.679	0.82298	0.846345	0.835336	1.46146	1.50785	1.45364	0.721221	0.645806	0.752822	0.851782	0.801092	0.772144	1.13517	1.06642	1.17842	1.00801	1.25115	0.90194	1.06925	0.559982	1.39381	0.0020451	0.767143	0.134886
C0SW08	248	S	Cell division cycle 2			CDC2	0.653	0.514	0.64	1.637	2.074	1.652	0.791	0.576	0.739	0.82298	0.846345	0.835336	1.46146	1.50785	1.45364	0.721221	0.645806	0.752822	0.793458	0.607317	0.766158	1.12011	1.37547	1.13646	1.09675	0.891909	0.98164	1.22278	0.102688	1.67612	0.0109849	0.729533	0.0320607
C0SW08	15	Y	Cell division cycle 2			CDC2	0.449	0.46	0.438	2.087	2.144	2.129	0.595	0.567	0.483	0.82298	0.846345	0.835336	1.46146	1.50785	1.45364	0.721221	0.645806	0.752822	0.545578	0.543514	0.52434	1.42802	1.42189	1.4646	0.82499	0.877973	0.641586	1.84023	0.00975895	2.67412	1.1266e-05	0.688163	0.075304
C0SW08	14	T	Cell division cycle 2			CDC2	0.517		0.528	1.888		1.98	0.702		0.538	0.82298	0.846345	0.835336	1.46146	1.50785	1.45364	0.721221	0.645806	0.752822	0.628205		0.632081	1.29186		1.3621	0.973349		0.714645	1.57225	0.146691	2.10584	0.0315642	0.746617	0.346263
C1PIG4	393	S	cAMP-dependent protein kinase regulatory subunit type II alpha			PRKAR2A	0.656		0.689	1.687		1.569	0.746		0.772	1.00635	1.01567	1.0543	0.867093	0.871276	0.818883	1.08737	1.14952	1.10773	0.65186		0.653512	1.94558		1.91602	0.686059		0.69692	2.79224	0.00273299	2.95824	0.00717843	0.943885	0.0825286
C1PIG4	96	S	cAMP-dependent protein kinase regulatory subunit type II alpha			PRKAR2A	0.752	0.751	0.765	1.475	1.456	1.425	0.838	0.865	0.835	1.00635	1.01567	1.0543	0.867093	0.871276	0.818883	1.08737	1.14952	1.10773	0.747255	0.73941	0.725598	1.70109	1.67111	1.74017	0.770666	0.752486	0.753793	2.24528	0.000168411	2.31092	0.000136399	0.971592	0.0671077
C5H0C6	16	S	Ubiquitin thioesterase			OTUB1	0.585			1.918			0.614			1.17281	1.14122	1.11113	0.670107	0.65845	0.780097	1.0957	1.15612	1.09416	0.498803			2.86223			0.560372			5.10773		5.7382		0.890128
C7EMF3	166	S	Kruppel-like factor 13			KLF13	0.848	0.64		1.525	1.568		0.708	0.876		1.05181			0.824307			1.11338			0.806226			1.85004			0.635902			2.90932		2.29469		1.26785
C9E1C9	186	T	CDK9			CDK9	0.471	0.352	0.413	2.053	2.309	2.136	0.604	0.531	0.499	1.03443	1.09528	1.08797	0.956027	0.96382	0.895192	1.04137	0.962739	1.00869	0.455325	0.32138	0.379607	2.14743	2.39568	2.38608	0.580007	0.551551	0.494699	4.26082	0.000954976	5.99248	0.000298587	0.711027	0.0349262
C9K506	315	T	Cyclin H			CCNH	0.646	0.669	0.637	1.823	1.774	1.756	0.639	0.678	0.646
C9K506	282	S	Cyclin H			CCNH	0.899		0.838	1.261		1.317	0.885		0.868
D0G7F6	212	S	Triosephosphate isomerase			TPI1										0.64356	0.622391	0.556154	1.72938	1.72096	1.89601	0.632833	0.722584	0.523053
D0VE66	185	S	Tristetraprolin			ZFP36
D2KX74	42	S	Cell division cycle 25 homolog B			CDC25B	0.922		0.899	1.379		0.96	0.764		1.143
D3K5N0	161	T	Cyclin-dependent kinase 20			CDK20	0.71	0.634	0.774	1.439	1.529	1.342	0.907	0.915	0.903
D3K5N7	127	S	ELAV-like protein			ELAVL1	0.937	0.924		1.143	0.97		0.951	1.107		1.00997	1.03491	1.03431	0.946553	0.926129	0.876673	1.0156	1.0396	1.10059	0.927752	0.892829		1.20754	1.04737		0.936394	1.06484		1.12676	0.347034	1.23857	0.211974	0.909731	0.382295
D3K5N7	41	S	ELAV-like protein			ELAVL1	1.177			0.796			1.026			1.00997	1.03491	1.03431	0.946553	0.926129	0.876673	1.0156	1.0396	1.10059	1.16538			0.840946			1.01024			0.83242		0.721605		1.15357
D3K5N7	202	S	ELAV-like protein			ELAVL1	0.926			1.13			0.972			1.00997	1.03491	1.03431	0.946553	0.926129	0.876673	1.0156	1.0396	1.10059	0.91686			1.19381			0.957071			1.24735		1.30206		0.957985
D4P3C2	272	S	Uncharacterized protein	Zinc finger CCCH-type antiviral protein 1 OS=Homo sapiens GN=ZC3HAV1 PE=1 SV=3	Zinc finger CCCH-type antiviral protein 1 OS=Mus musculus GN=Zc3hav1 PE=1 SV=1	zap	0.641	0.517	0.492	1.719	2.07	1.997	0.731	0.576	0.556	0.905542	0.992761	0.973758	1.10731	1.06129	0.9881	0.955957	0.954281	0.987898	0.707864	0.52077	0.505259	1.55241	1.95045	2.02105	0.764679	0.603595	0.562811	2.86052	0.00691529	3.18584	0.00560753	0.897885	0.504189
D4P3C2	585	S	Uncharacterized protein	Zinc finger CCCH-type antiviral protein 1 OS=Homo sapiens GN=ZC3HAV1 PE=1 SV=3	Zinc finger CCCH-type antiviral protein 1 OS=Mus musculus GN=Zc3hav1 PE=1 SV=1	zap	0.86			1.271			0.913			0.905542	0.992761	0.973758	1.10731	1.06129	0.9881	0.955957	0.954281	0.987898	0.949708			1.14782			0.955064			1.20183		1.20861		0.994392
D4P3C2	281	S	Uncharacterized protein	Zinc finger CCCH-type antiviral protein 1 OS=Homo sapiens GN=ZC3HAV1 PE=1 SV=3	Zinc finger CCCH-type antiviral protein 1 OS=Mus musculus GN=Zc3hav1 PE=1 SV=1	zap	0.665	0.536	0.612	1.836	2.067	1.937	0.611	0.561	0.502	0.905542	0.992761	0.973758	1.10731	1.06129	0.9881	0.955957	0.954281	0.987898	0.734367	0.539908	0.628493	1.65807	1.94763	1.96033	0.63915	0.587877	0.508149	3.20776	0.00242708	2.92522	0.00133314	1.09658	0.462819
D4P3C2	209	S	Uncharacterized protein	Zinc finger CCCH-type antiviral protein 1 OS=Homo sapiens GN=ZC3HAV1 PE=1 SV=3	Zinc finger CCCH-type antiviral protein 1 OS=Mus musculus GN=Zc3hav1 PE=1 SV=1	zap	0.801		0.798	1.498		1.363	0.774		0.861	0.905542	0.992761	0.973758	1.10731	1.06129	0.9881	0.955957	0.954281	0.987898	0.884554		0.819505	1.35282		1.37942	0.80966		0.871547	1.62516	0.0169889	1.60337	0.0199429	1.01359	0.822928
D4P3C2	254	S	Uncharacterized protein	Zinc finger CCCH-type antiviral protein 1 OS=Homo sapiens GN=ZC3HAV1 PE=1 SV=3	Zinc finger CCCH-type antiviral protein 1 OS=Mus musculus GN=Zc3hav1 PE=1 SV=1	zap	0.654			1.67			0.762			0.905542	0.992761	0.973758	1.10731	1.06129	0.9881	0.955957	0.954281	0.987898	0.72222			1.50815			0.797107			1.89203		2.08822		0.906051
D4P3C2	101	S	Uncharacterized protein	Zinc finger CCCH-type antiviral protein 1 OS=Homo sapiens GN=ZC3HAV1 PE=1 SV=3	Zinc finger CCCH-type antiviral protein 1 OS=Mus musculus GN=Zc3hav1 PE=1 SV=1	zap	0.471			2.065			0.594			0.905542	0.992761	0.973758	1.10731	1.06129	0.9881	0.955957	0.954281	0.987898	0.520131			1.86487			0.621367			3.00124		3.58539		0.837075
D4P3C2	399	S	Uncharacterized protein	Zinc finger CCCH-type antiviral protein 1 OS=Homo sapiens GN=ZC3HAV1 PE=1 SV=3	Zinc finger CCCH-type antiviral protein 1 OS=Mus musculus GN=Zc3hav1 PE=1 SV=1	zap	0.411	0.463	0.499	2.291	2.146	2.049	0.456	0.563	0.501	0.905542	0.992761	0.973758	1.10731	1.06129	0.9881	0.955957	0.954281	0.987898	0.453872	0.466376	0.512448	2.06897	2.02207	2.07368	0.477009	0.589973	0.507137	3.91629	4.30438e-05	4.30288	3.61259e-07	0.910157	0.303989
D4P3C2	459	S	Uncharacterized protein	Zinc finger CCCH-type antiviral protein 1 OS=Homo sapiens GN=ZC3HAV1 PE=1 SV=3	Zinc finger CCCH-type antiviral protein 1 OS=Mus musculus GN=Zc3hav1 PE=1 SV=1	zap	0.607	0.454	0.577	1.882	2.268	1.882	0.624	0.471	0.585	0.905542	0.992761	0.973758	1.10731	1.06129	0.9881	0.955957	0.954281	0.987898	0.670317	0.45731	0.59255	1.69961	2.13702	1.90467	0.652749	0.493565	0.592166	3.30248	0.00433913	3.33762	0.0027614	0.989472	0.941413
E1CAJ6	129	S	Protein disulfide isomerase P5			pdi-p5	0.573			1.648			0.855			0.574903	0.6014	0.658864	1.53501	1.46423	1.44908	0.884599	0.941824	0.861166	0.99669			1.07361			0.96654			1.11077		1.07717		1.03119
E5GAJ0	410	S	KIAA0226 protein transcript variant 2			RUBCN	0.774	0.68		1.57	1.68		0.737	0.747
E7CXS0	950	S	Low density lipoprotein receptor-related protein 8			ApoER2										0.321135	0.405999	0.50706	2.33167	2.12935	1.83684	0.405649	0.527536	0.61023
F1REW7	205	S	Uncharacterized protein	Arginine/serine-rich coiled-coil protein 2 OS=Homo sapiens GN=RSRC2 PE=1 SV=1	Arginine/serine-rich coiled-coil protein 2 OS=Mus musculus GN=Rsrc2 PE=2 SV=1	RSRC2	0.713	0.776	0.715	1.596	1.443	1.565	0.771	0.853	0.752	0.912566	0.914922	0.870993	1.25441	1.23998	1.26494	0.847162	0.866312	0.864513	0.781313	0.84816	0.820902	1.27231	1.16373	1.23721	0.910097	0.984634	0.869854	1.32868	0.00287162	1.49906	0.00106993	0.886345	0.0689397
F1REW7	203	T	Uncharacterized protein	Arginine/serine-rich coiled-coil protein 2 OS=Homo sapiens GN=RSRC2 PE=1 SV=1	Arginine/serine-rich coiled-coil protein 2 OS=Mus musculus GN=Rsrc2 PE=2 SV=1	RSRC2	0.733	0.758	0.72	1.562	1.469	1.552	0.78	0.848	0.758	0.912566	0.914922	0.870993	1.25441	1.23998	1.26494	0.847162	0.866312	0.864513	0.803229	0.828486	0.826643	1.2452	1.1847	1.22694	0.920721	0.978862	0.876795	1.31713	0.00238177	1.48751	0.000408666	0.885455	0.0607809
F1REW7	32	S	Uncharacterized protein	Arginine/serine-rich coiled-coil protein 2 OS=Homo sapiens GN=RSRC2 PE=1 SV=1	Arginine/serine-rich coiled-coil protein 2 OS=Mus musculus GN=Rsrc2 PE=2 SV=1	RSRC2	0.606	0.561	0.645	1.824	1.962	1.723	0.676	0.624	0.669	0.912566	0.914922	0.870993	1.25441	1.23998	1.26494	0.847162	0.866312	0.864513	0.664061	0.613167	0.740534	1.45407	1.58228	1.36212	0.797958	0.720295	0.773846	1.91897	0.00402923	2.17988	0.00126709	0.880312	0.117331
F1REW7	4	S	Uncharacterized protein	Arginine/serine-rich coiled-coil protein 2 OS=Homo sapiens GN=RSRC2 PE=1 SV=1	Arginine/serine-rich coiled-coil protein 2 OS=Mus musculus GN=Rsrc2 PE=2 SV=1	RSRC2	0.57	0.483	0.603	1.988	2.074	1.842	0.569	0.604	0.597	0.912566	0.914922	0.870993	1.25441	1.23998	1.26494	0.847162	0.866312	0.864513	0.624612	0.527914	0.692313	1.5848	1.67261	1.4562	0.671654	0.697208	0.690563	2.2888	0.00451699	2.55502	0.000393543	0.895803	0.271059
F1REY3	288	S	Uncharacterized protein	NEDD4-binding protein 1 OS=Homo sapiens GN=N4BP1 PE=1 SV=4	NEDD4-binding protein 1 OS=Mus musculus GN=N4bp1 PE=1 SV=2	N4BP1	0.773	0.688	0.698	1.503	1.598	1.541	0.795	0.807	0.79			1.15546			0.725677			1.1312			0.604088			2.12354			0.698375	3.04068		3.51527		0.864992
F1REY3	242	T	Uncharacterized protein	NEDD4-binding protein 1 OS=Homo sapiens GN=N4BP1 PE=1 SV=4	NEDD4-binding protein 1 OS=Mus musculus GN=N4bp1 PE=1 SV=2	N4BP1	1.038	0.838	0.883	1.141	1.343	1.203	0.861	0.879	0.933			1.15546			0.725677			1.1312			0.764197			1.65776			0.824789	2.00992		2.16929		0.926537
F1REY3	300	S	Uncharacterized protein	NEDD4-binding protein 1 OS=Homo sapiens GN=N4BP1 PE=1 SV=4	NEDD4-binding protein 1 OS=Mus musculus GN=N4bp1 PE=1 SV=2	N4BP1	0.614		0.593	1.862		1.976	0.636		0.483			1.15546			0.725677			1.1312			0.513215			2.72298			0.426981	6.37728		5.30572		1.20196
F1RF12	34	S	Uncharacterized protein	Lysophosphatidylcholine acyltransferase 2 OS=Homo sapiens GN=LPCAT2 PE=1 SV=1	Lysophosphatidylcholine acyltransferase 2 OS=Mus musculus GN=Lpcat2 PE=1 SV=1	LPCAT2	0.821	0.846		1.383	1.357		0.853	0.859
F1RF19	191	S	Uncharacterized protein	E3 ubiquitin-protein ligase AMFR OS=Homo sapiens GN=AMFR PE=1 SV=2	E3 ubiquitin-protein ligase AMFR OS=Mus musculus GN=Amfr PE=1 SV=2	---	0.169	0.52	0.374	2.853	2.055	2.292	0.199	0.587	0.392	0.873726	0.819486	0.85627	1.28415	1.45711	1.17074	0.855467	0.762259	0.948891	0.193425	0.634544	0.436778	2.2217	1.41032	1.95773	0.232621	0.77008	0.413114	3.94808	0.0118169	4.41966	0.0123758	0.893299	0.816817
F1RF38	252	T	Uncharacterized protein	Katanin p80 WD40 repeat-containing subunit B1 OS=Homo sapiens GN=KATNB1 PE=1 SV=1	Katanin p80 WD40 repeat-containing subunit B1 OS=Mus musculus GN=Katnb1 PE=1 SV=1	KATNB1	0.757			1.475			0.833
F1RF47	373	S	Uncharacterized protein	Junction-mediating and -regulatory protein OS=Homo sapiens GN=JMY PE=1 SV=2	Junction-mediating and -regulatory protein OS=Mus musculus GN=Jmy PE=1 SV=1	JMY	1.043			0.981			0.992			1.1855	1.04038	1.3775	0.801002	0.760249	0.540952	1.01247	1.17443	1.11247	0.8798			1.22472			0.979782			1.24999		1.39204		0.897955
F1RF47	370	S	Uncharacterized protein	Junction-mediating and -regulatory protein OS=Homo sapiens GN=JMY PE=1 SV=2	Junction-mediating and -regulatory protein OS=Mus musculus GN=Jmy PE=1 SV=1	JMY	0.847	0.775	0.759	1.291	1.436	1.423	0.908	0.86	0.842	1.1855	1.04038	1.3775	0.801002	0.760249	0.540952	1.01247	1.17443	1.11247	0.714468	0.744921	0.550997	1.61173	1.88885	2.63055	0.896816	0.732269	0.756877	2.56967	0.0509807	3.04973	0.0411884	0.842589	0.190299
F1RF47	546	S	Uncharacterized protein	Junction-mediating and -regulatory protein OS=Homo sapiens GN=JMY PE=1 SV=2	Junction-mediating and -regulatory protein OS=Mus musculus GN=Jmy PE=1 SV=1	JMY	1.075		1.078	0.819		0.806	1.1		1.12	1.1855	1.04038	1.3775	0.801002	0.760249	0.540952	1.01247	1.17443	1.11247	0.906793		0.782576	1.02247		1.48997	1.08645		1.00677	1.20027	0.532533	1.4872	0.314741	0.807065	0.132324
F1RF72	214	S	Uncharacterized protein	Vacuolar protein sorting-associated protein 13D OS=Homo sapiens GN=VPS13D PE=1 SV=2	Vacuolar protein sorting-associated protein 13C OS=Mus musculus GN=Vps13c PE=1 SV=2	LOC100514237	0.391	0.424	0.388	2.261	2.239	2.228	0.501	0.522	0.437
F1RF75	252	T	Uncharacterized protein	Migration and invasion-inhibitory protein OS=Homo sapiens GN=MIIP PE=1 SV=3	Migration and invasion-inhibitory protein OS=Mus musculus GN=Miip PE=2 SV=1	MIIP	0.844	0.712		1.029	1.518		1.133	0.851
F1RFA3	155	S	Uncharacterized protein	RNA-binding protein with serine-rich domain 1 OS=Homo sapiens GN=RNPS1 PE=1 SV=1	RNA-binding protein with serine-rich domain 1 OS=Mus musculus GN=Rnps1 PE=1 SV=1	RNPS1	1.128	0.96	1.171	1.008	1.033	0.931	0.89	1.02	0.921
F1RFA3	157	S	Uncharacterized protein	RNA-binding protein with serine-rich domain 1 OS=Homo sapiens GN=RNPS1 PE=1 SV=1	RNA-binding protein with serine-rich domain 1 OS=Mus musculus GN=Rnps1 PE=1 SV=1	RNPS1	1.125	0.96	1.185	1.01	1.033	0.909	0.891	1.02	0.928
F1RFB2	1255	S	Uncharacterized protein	Tuberin OS=Homo sapiens GN=TSC2 PE=1 SV=2	Tuberin OS=Mus musculus GN=Tsc2 PE=1 SV=1	TSC2	0.868	0.854	0.762	1.246	1.221	1.412	0.927	0.964	0.85	1.00497	1.05117	1.21077	0.880193	0.773996	0.652501	1.10508	1.13266	1.15356	0.863711	0.812426	0.62935	1.4156	1.57753	2.16398	0.838853	0.851096	0.736847	2.12507	0.0538523	2.23688	0.0425121	0.950013	0.64763
F1RFB8	69	S	2-aminoethanethiol (Cysteamine) dioxygenase			ADO	0.836	0.782	0.821	1.415	1.425	1.404	0.813	0.861	0.804	1.09372	1.1146	1.11472	0.797749	0.858825	0.799054	1.10359	1.12952	1.07857	0.764362	0.701595	0.73651	1.77374	1.65924	1.75708	0.736688	0.762273	0.74543	2.31246	0.000869254	2.35648	0.000153312	0.981321	0.534114
F1RFC2	445	S	Uncharacterized protein	AT-rich interactive domain-containing protein 5B OS=Homo sapiens GN=ARID5B PE=1 SV=3	AT-rich interactive domain-containing protein 5B OS=Mus musculus GN=Arid5b PE=1 SV=3	ARID5B	0.74	0.763		1.463	1.345		0.86	0.946		1.0887	1.03637	1.05359	0.884866	0.87566	0.692525	1.02424	1.07633	1.25714	0.679711	0.736225		1.65336	1.53598		0.839643	0.878911		1.85583	0.0327312	2.25246	0.0170242	0.823911	0.0588553
F1RFC2	759	S	Uncharacterized protein	AT-rich interactive domain-containing protein 5B OS=Homo sapiens GN=ARID5B PE=1 SV=3	AT-rich interactive domain-containing protein 5B OS=Mus musculus GN=Arid5b PE=1 SV=3	ARID5B	0.917		0.818	1.406		1.453	0.747		0.761	1.0887	1.03637	1.05359	0.884866	0.87566	0.692525	1.02424	1.07633	1.25714	0.84229		0.776394	1.58894		2.09812	0.729318		0.60534	2.76255	0.119574	2.27781	0.148631	1.21281	0.218753
F1RFC2	789	S	Uncharacterized protein	AT-rich interactive domain-containing protein 5B OS=Homo sapiens GN=ARID5B PE=1 SV=3	AT-rich interactive domain-containing protein 5B OS=Mus musculus GN=Arid5b PE=1 SV=3	ARID5B	0.686	0.562	0.693	1.8	1.94	1.619	0.622	0.643	0.722	1.0887	1.03637	1.05359	0.884866	0.87566	0.692525	1.02424	1.07633	1.25714	0.63011	0.542278	0.657752	2.03421	2.21547	2.33782	0.607277	0.597399	0.574318	3.70294	0.00273369	3.59945	0.00100206	1.02875	0.678046
F1RFC5	77	S	Uncharacterized protein	Protein kinase C beta type OS=Homo sapiens GN=PRKCB PE=1 SV=4	Protein kinase C beta type OS=Mus musculus GN=Prkcb PE=1 SV=4	---	0.701	0.733	0.802	1.576	1.503	1.273	0.799	0.844	0.942	0.90129	0.934744	0.972393	1.0569	1.06867	0.990362	1.02232	0.963859	1.02085	0.777774	0.784172	0.82477	1.49115	1.40642	1.28539	0.781559	0.875647	0.922762	1.62132	0.00282058	1.7526	0.00704391	0.925095	0.256985
F1RFC5	187	T	Uncharacterized protein	Protein kinase C beta type OS=Homo sapiens GN=PRKCB PE=1 SV=4	Protein kinase C beta type OS=Mus musculus GN=Prkcb PE=1 SV=4	---	0.661			1.733			0.702			0.90129	0.934744	0.972393	1.0569	1.06867	0.990362	1.02232	0.963859	1.02085	0.733393			1.6397			0.686676			2.38788		2.23577		1.06803
F1RFD3	329	S	Splicing factor 3A subunit 1			SF3A1	0.728			1.52			0.822			0.903678		0.875108	1.20023		1.24711	0.861877		0.867994	0.805597			1.26642			0.953732			1.32786		1.57203		0.844678
F1RFD8	1706	S	Uncharacterized protein	E3 ubiquitin-protein ligase RBBP6 OS=Homo sapiens GN=RBBP6 PE=1 SV=1	E3 ubiquitin-protein ligase RBBP6 OS=Mus musculus GN=Rbbp6 PE=1 SV=5	RBBP6	0.453	0.367	0.517	2.169	2.297	1.935	0.521	0.528	0.59	1.02715	0.980918	1.10479	1.00166	1.1621	0.978459	0.950664	0.817046	0.925825	0.441024	0.374139	0.467961	2.1654	1.9766	1.9776	0.548038	0.646231	0.637269	3.34123	0.000294126	4.76929	0.000292511	0.700572	0.0124533
F1RFD8	860	S	Uncharacterized protein	E3 ubiquitin-protein ligase RBBP6 OS=Homo sapiens GN=RBBP6 PE=1 SV=1	E3 ubiquitin-protein ligase RBBP6 OS=Mus musculus GN=Rbbp6 PE=1 SV=5	RBBP6	0.58	0.563	0.498	1.923	1.743	1.929	0.615	0.803	0.613	1.02715	0.980918	1.10479	1.00166	1.1621	0.978459	0.950664	0.817046	0.925825	0.564667	0.573952	0.450763	1.91981	1.49987	1.97147	0.646916	0.982809	0.662112	2.35233	0.00651415	3.39198	0.00973291	0.693497	0.155356
F1RFD8	1710	S	Uncharacterized protein	E3 ubiquitin-protein ligase RBBP6 OS=Homo sapiens GN=RBBP6 PE=1 SV=1	E3 ubiquitin-protein ligase RBBP6 OS=Mus musculus GN=Rbbp6 PE=1 SV=5	RBBP6	0.363	0.196	0.266	2.489	2.79	2.573	0.332	0.279	0.23	1.02715	0.980918	1.10479	1.00166	1.1621	0.978459	0.950664	0.817046	0.925825	0.353404	0.199813	0.240769	2.48487	2.40083	2.62965	0.349229	0.341474	0.248427	8.00245	0.000112177	9.46534	2.8768e-05	0.845447	0.442846
F1RFD8	771	S	Uncharacterized protein	E3 ubiquitin-protein ligase RBBP6 OS=Homo sapiens GN=RBBP6 PE=1 SV=1	E3 ubiquitin-protein ligase RBBP6 OS=Mus musculus GN=Rbbp6 PE=1 SV=5	RBBP6	0.749			1.494			0.825			1.02715	0.980918	1.10479	1.00166	1.1621	0.978459	0.950664	0.817046	0.925825	0.729199			1.49152			0.867814			1.71871		2.04542		0.840271
F1RFD8	1276	S	Uncharacterized protein	E3 ubiquitin-protein ligase RBBP6 OS=Homo sapiens GN=RBBP6 PE=1 SV=1	E3 ubiquitin-protein ligase RBBP6 OS=Mus musculus GN=Rbbp6 PE=1 SV=5	RBBP6	0.48		0.456	2.118		2.116	0.54		0.477	1.02715	0.980918	1.10479	1.00166	1.1621	0.978459	0.950664	0.817046	0.925825	0.467311		0.412747	2.11448		2.16258	0.568024		0.515216	3.9484	0.000527628	4.85999	0.000505849	0.812431	0.116016
F1RFD8	1177	S	Uncharacterized protein	E3 ubiquitin-protein ligase RBBP6 OS=Homo sapiens GN=RBBP6 PE=1 SV=1	E3 ubiquitin-protein ligase RBBP6 OS=Mus musculus GN=Rbbp6 PE=1 SV=5	RBBP6	0.622	0.549		1.849	1.893		0.639	0.693		1.02715	0.980918	1.10479	1.00166	1.1621	0.978459	0.950664	0.817046	0.925825	0.605557	0.55968		1.84593	1.62895		0.672162	0.848178		2.2856	0.0221127	2.98212	0.0504042	0.766432	0.277651
F1RFD8	1192	T	Uncharacterized protein	E3 ubiquitin-protein ligase RBBP6 OS=Homo sapiens GN=RBBP6 PE=1 SV=1	E3 ubiquitin-protein ligase RBBP6 OS=Mus musculus GN=Rbbp6 PE=1 SV=5	RBBP6	0.44	0.356	0.43	2.23	2.253	2.184	0.48	0.574	0.44	1.02715	0.980918	1.10479	1.00166	1.1621	0.978459	0.950664	0.817046	0.925825	0.428368	0.362925	0.389213	2.2263	1.93874	2.23208	0.50491	0.702531	0.475252	3.80171	0.000324824	5.41896	0.00228519	0.701558	0.135652
F1RFD8	1708	S	Uncharacterized protein	E3 ubiquitin-protein ligase RBBP6 OS=Homo sapiens GN=RBBP6 PE=1 SV=1	E3 ubiquitin-protein ligase RBBP6 OS=Mus musculus GN=Rbbp6 PE=1 SV=5	RBBP6	0.359			2.487			0.337			1.02715	0.980918	1.10479	1.00166	1.1621	0.978459	0.950664	0.817046	0.925825	0.349509			2.48287			0.354489			7.00408		7.10387		0.985953
F1RFF0	613	S	Uncharacterized protein	Myotubularin-related protein 3 OS=Homo sapiens GN=MTMR3 PE=1 SV=3	Myotubularin-related protein 3 OS=Mus musculus GN=Mtmr3 PE=1 SV=2	MTMR3	0.629	0.5	0.578	1.759	2.068	1.823	0.71	0.593	0.638
F1RFF0	633	S	Uncharacterized protein	Myotubularin-related protein 3 OS=Homo sapiens GN=MTMR3 PE=1 SV=3	Myotubularin-related protein 3 OS=Mus musculus GN=Mtmr3 PE=1 SV=2	MTMR3
F1RFG1	1020	S	Uncharacterized protein	General transcription factor 3C polypeptide 1 OS=Homo sapiens GN=GTF3C1 PE=1 SV=4	General transcription factor 3C polypeptide 1 OS=Mus musculus GN=Gtf3c1 PE=1 SV=2	GTF3C1	0.937			0.858			1.194			1.07806	1.07726	1.04549	0.856618	0.898164	0.872645	1.07739	1.01845	1.08963	0.869158			1.00161			1.10824			0.903791		1.15239		0.784272
F1RFG1	1769	S	Uncharacterized protein	General transcription factor 3C polypeptide 1 OS=Homo sapiens GN=GTF3C1 PE=1 SV=4	General transcription factor 3C polypeptide 1 OS=Mus musculus GN=Gtf3c1 PE=1 SV=2	GTF3C1	0.805	0.815		1.457	1.345		0.804	0.898		1.07806	1.07726	1.04549	0.856618	0.898164	0.872645	1.07739	1.01845	1.08963	0.746715	0.756546		1.70087	1.4975		0.746249	0.881736		1.96462	0.0325839	2.12762	0.0754192	0.923388	0.525867
F1RFG1	1868	S	Uncharacterized protein	General transcription factor 3C polypeptide 1 OS=Homo sapiens GN=GTF3C1 PE=1 SV=4	General transcription factor 3C polypeptide 1 OS=Mus musculus GN=Gtf3c1 PE=1 SV=2	GTF3C1	0.705	0.578		1.624	1.845		0.754	0.705		1.07806	1.07726	1.04549	0.856618	0.898164	0.872645	1.07739	1.01845	1.08963	0.653955	0.536545		1.89583	2.05419		0.69984	0.692232		2.83751	0.0389404	3.31795	0.00693665	0.8552	0.334815
F1RFG1	1949	S	Uncharacterized protein	General transcription factor 3C polypeptide 1 OS=Homo sapiens GN=GTF3C1 PE=1 SV=4	General transcription factor 3C polypeptide 1 OS=Mus musculus GN=Gtf3c1 PE=1 SV=2	GTF3C1	0.793	0.811	0.674	1.428	1.402	1.609	0.84	0.855	0.748	1.07806	1.07726	1.04549	0.856618	0.898164	0.872645	1.07739	1.01845	1.08963	0.735584	0.752833	0.644673	1.66702	1.56096	1.84382	0.779663	0.839515	0.686474	2.19973	0.00201511	2.37768	0.00279153	0.925157	0.364591
F1RFG1	1859	S	Uncharacterized protein	General transcription factor 3C polypeptide 1 OS=Homo sapiens GN=GTF3C1 PE=1 SV=4	General transcription factor 3C polypeptide 1 OS=Mus musculus GN=Gtf3c1 PE=1 SV=2	GTF3C1	0.788	0.728	0.84	1.436	1.455	1.265	0.838	0.888	0.914	1.07806	1.07726	1.04549	0.856618	0.898164	0.872645	1.07739	1.01845	1.08963	0.730946	0.675786	0.803451	1.67636	1.61997	1.44962	0.777807	0.871917	0.83882	1.90712	0.00339947	2.14731	0.00145942	0.888143	0.120224
F1RFG1	1855	S	Uncharacterized protein	General transcription factor 3C polypeptide 1 OS=Homo sapiens GN=GTF3C1 PE=1 SV=4	General transcription factor 3C polypeptide 1 OS=Mus musculus GN=Gtf3c1 PE=1 SV=2	GTF3C1	0.782	0.757	0.751	1.445	1.411	1.385	0.835	0.897	0.884	1.07806	1.07726	1.04549	0.856618	0.898164	0.872645	1.07739	1.01845	1.08963	0.72538	0.702706	0.718323	1.68687	1.57098	1.58713	0.775022	0.880754	0.811287	1.96386	9.03753e-05	2.25725	0.00118629	0.870026	0.0688871
F1RFG1	1070	S	Uncharacterized protein	General transcription factor 3C polypeptide 1 OS=Homo sapiens GN=GTF3C1 PE=1 SV=4	General transcription factor 3C polypeptide 1 OS=Mus musculus GN=Gtf3c1 PE=1 SV=2	GTF3C1	0.845	0.973	0.9	1.347	1.072	1.133	0.863	0.976	0.982	1.07806	1.07726	1.04549	0.856618	0.898164	0.872645	1.07739	1.01845	1.08963	0.783819	0.903214	0.86084	1.57246	1.19355	1.29835	0.801011	0.958324	0.901226	1.52763	0.0388841	1.5952	0.0368875	0.957645	0.553274
F1RFG1	1071	S	Uncharacterized protein	General transcription factor 3C polypeptide 1 OS=Homo sapiens GN=GTF3C1 PE=1 SV=4	General transcription factor 3C polypeptide 1 OS=Mus musculus GN=Gtf3c1 PE=1 SV=2	GTF3C1	0.872	0.898	0.915	1.291	1.123	1.124	0.885	1.005	0.977	1.07806	1.07726	1.04549	0.856618	0.898164	0.872645	1.07739	1.01845	1.08963	0.808864	0.833593	0.875187	1.50709	1.25033	1.28804	0.821431	0.986798	0.896638	1.49562	0.0141966	1.60684	0.0191335	0.930783	0.323418
F1RFH0	479	S	Uncharacterized protein	GAS2-like protein 1 OS=Homo sapiens GN=GAS2L1 PE=1 SV=2	GAS2-like protein 1 OS=Mus musculus GN=Gas2l1 PE=1 SV=1	GAS2L1	0.711		0.677	1.647		1.402	0.729		0.936
F1RFH0	292	S	Uncharacterized protein	GAS2-like protein 1 OS=Homo sapiens GN=GAS2L1 PE=1 SV=2	GAS2-like protein 1 OS=Mus musculus GN=Gas2l1 PE=1 SV=1	GAS2L1
F1RFH0	490	S	Uncharacterized protein	GAS2-like protein 1 OS=Homo sapiens GN=GAS2L1 PE=1 SV=2	GAS2-like protein 1 OS=Mus musculus GN=Gas2l1 PE=1 SV=1	GAS2L1	0.827	0.75		1.535	1.349		0.719	0.955
F1RFH0	297	S	Uncharacterized protein	GAS2-like protein 1 OS=Homo sapiens GN=GAS2L1 PE=1 SV=2	GAS2-like protein 1 OS=Mus musculus GN=Gas2l1 PE=1 SV=1	GAS2L1	0.468	0.681		2.051	1.637		0.608	0.781
F1RFH6	371	S	Uncharacterized protein	NFATC2-interacting protein OS=Homo sapiens GN=NFATC2IP PE=1 SV=1	NFATC2-interacting protein OS=Mus musculus GN=Nfatc2ip PE=1 SV=1	NFATC2IP	0.577	0.6	0.596	1.777	1.791	1.72	0.741	0.729	0.716	1.11467	1.044	1.02675	0.930622	0.776616	0.885748	0.958627	1.04172	1.12994	0.51764	0.574711	0.58047	1.90948	2.30616	1.94186	0.772981	0.699802	0.633661	2.92317	0.00506153	3.68091	0.00613714	0.794145	0.0502616
F1RFH6	92	S	Uncharacterized protein	NFATC2-interacting protein OS=Homo sapiens GN=NFATC2IP PE=1 SV=1	NFATC2-interacting protein OS=Mus musculus GN=Nfatc2ip PE=1 SV=1	NFATC2IP	0.606		0.596	1.862		1.817	0.643		0.627	1.11467	1.044	1.02675	0.930622	0.776616	0.885748	0.958627	1.04172	1.12994	0.543657		0.58047	2.00081		2.05137	0.670751		0.554896	3.30616	0.0101469	3.60474	0.000794566	0.91717	0.537327
F1RFJ6	58	S	Uncharacterized protein	ADP-ribosylation factor-like protein 6-interacting protein 4 OS=Homo sapiens GN=ARL6IP4 PE=1 SV=2	ADP-ribosylation factor-like protein 6-interacting protein 4 OS=Mus musculus GN=Arl6ip4 PE=1 SV=1	ARL6IP4	0.623			1.9			0.595			1.14628	1.16549	1.1897	0.776048	0.804272	0.834074	1.07117	1.02101	0.992063	0.5435			2.4483			0.55547			4.40763		4.5047		0.97845
F1RFK3	1754	S	Uncharacterized protein	Transformation/transcription domain-associated protein OS=Homo sapiens GN=TRRAP PE=1 SV=3	Transformation/transcription domain-associated protein OS=Mus musculus GN=Trrap PE=1 SV=2	TRRAP	0.55		0.555	1.969		1.982	0.603		0.512	1.07067	1.11997	1.10178	0.864518	0.819431	0.801967	1.08174	1.05159	1.06425	0.513697		0.50373	2.27757		2.47142	0.557437		0.48109	4.57282	0.0162648	4.66765	0.0326063	0.979683	0.828563
F1RFL4	346	S	Uncharacterized protein	RILP-like protein 1 OS=Homo sapiens GN=RILPL1 PE=1 SV=1	RILP-like protein 1 OS=Mus musculus GN=Rilpl1 PE=1 SV=1	RILPL1	0.764	0.678	0.729	1.514	1.598	1.48	0.794	0.816	0.816			0.958392			1.03058			1.00753			0.760649			1.43609			0.809903	1.77316		1.88797		0.939185
F1RFL9	695	S	V-type proton ATPase subunit a			ATP6V0A2	0.671		0.717	1.764		1.692	0.667		0.632
F1RFN3	1777	S	Uncharacterized protein	Nuclear receptor corepressor 2 OS=Homo sapiens GN=NCOR2 PE=1 SV=2	Nuclear receptor corepressor 2 OS=Mus musculus GN=Ncor2 PE=1 SV=3	NCOR2	1.038	0.913	0.895	1.11	1.181	1.224	0.887	0.943	0.902	1.05613		0.732742	0.980352		1.67343	0.966659		0.573563	0.982837		1.22144	1.13225		0.731431	0.917594		1.57263	0.748399	0.515159	0.845483	0.555736	0.885174	0.740476
F1RFN3	503	S	Uncharacterized protein	Nuclear receptor corepressor 2 OS=Homo sapiens GN=NCOR2 PE=1 SV=2	Nuclear receptor corepressor 2 OS=Mus musculus GN=Ncor2 PE=1 SV=3	NCOR2			0.629			1.853			0.564	1.05613		0.732742	0.980352		1.67343	0.966659		0.573563			0.858419			1.10731			0.983327	1.12608		1.28994		0.872975
F1RFN3	955	T	Uncharacterized protein	Nuclear receptor corepressor 2 OS=Homo sapiens GN=NCOR2 PE=1 SV=2	Nuclear receptor corepressor 2 OS=Mus musculus GN=Ncor2 PE=1 SV=3	NCOR2	0.759	0.67	0.773	1.503	1.689	1.474	0.808	0.748	0.781	1.05613		0.732742	0.980352		1.67343	0.966659		0.573563	0.718664		1.05494	1.53312		0.880825	0.835869		1.36166	1.09848	0.82128	1.36104	0.500244	0.80709	0.577537
F1RFN3	1832	S	Uncharacterized protein	Nuclear receptor corepressor 2 OS=Homo sapiens GN=NCOR2 PE=1 SV=2	Nuclear receptor corepressor 2 OS=Mus musculus GN=Ncor2 PE=1 SV=3	NCOR2										1.05613		0.732742	0.980352		1.67343	0.966659		0.573563
F1RFN3	1797	S	Uncharacterized protein	Nuclear receptor corepressor 2 OS=Homo sapiens GN=NCOR2 PE=1 SV=2	Nuclear receptor corepressor 2 OS=Mus musculus GN=Ncor2 PE=1 SV=3	NCOR2	0.663		0.617	1.746		1.783	0.689		0.64	1.05613		0.732742	0.980352		1.67343	0.966659		0.573563	0.627766		0.842043	1.78099		1.06548	0.712764		1.11583	1.55664	0.368336	1.93663	0.286596	0.803791	0.535505
F1RFN4	151	S	Uncharacterized protein	Nuclear receptor corepressor 2 OS=Homo sapiens GN=NCOR2 PE=1 SV=2	Nuclear receptor corepressor 2 OS=Mus musculus GN=Ncor2 PE=1 SV=3	---	0.72	0.683	0.781	1.625	1.654	1.459	0.739	0.766	0.789
F1RFN4	148	S	Uncharacterized protein	Nuclear receptor corepressor 2 OS=Homo sapiens GN=NCOR2 PE=1 SV=2	Nuclear receptor corepressor 2 OS=Mus musculus GN=Ncor2 PE=1 SV=3	---	0.607	0.681	0.713	1.82	1.636	1.598	0.677	0.783	0.723
F1RFQ7	135	S	GTP-binding nuclear protein Ran			RAN	0.666	0.57	0.568	1.698	1.964	1.874	0.727	0.614	0.6	1.27618	1.19915	1.1955	0.500895	0.564475	0.667269	1.19632	1.20404	1.17162	0.52187	0.475335	0.475114	3.38994	3.47934	2.80846	0.607697	0.509951	0.512111	5.93814	0.00522531	6.57313	0.00565081	0.903396	0.242267
F1RFQ9	817	S	Uncharacterized protein	Splicing factor, suppressor of white-apricot homolog OS=Homo sapiens GN=SFSWAP PE=1 SV=3	Splicing factor, suppressor of white-apricot homolog OS=Mus musculus GN=Sfswap PE=1 SV=2	SFSWAP	1.005			1.295			0.76			0.781713	0.91296	0.786621	1.31966	1.20695	1.40197	0.907111	0.897238	0.866597	1.28564			0.981315			0.837825			1.17127		0.76329		1.5345
F1RFQ9	886	S	Uncharacterized protein	Splicing factor, suppressor of white-apricot homolog OS=Homo sapiens GN=SFSWAP PE=1 SV=3	Splicing factor, suppressor of white-apricot homolog OS=Mus musculus GN=Sfswap PE=1 SV=2	SFSWAP	0.83	0.725	0.691	1.304	1.417	1.479	0.912	0.922	0.852	0.781713	0.91296	0.786621	1.31966	1.20695	1.40197	0.907111	0.897238	0.866597	1.06177	0.79412	0.878441	0.988135	1.17404	1.05495	1.00539	1.0276	0.983156	1.06663	0.342645	1.17656	0.177694	0.906565	0.35621
F1RFQ9	872	S	Uncharacterized protein	Splicing factor, suppressor of white-apricot homolog OS=Homo sapiens GN=SFSWAP PE=1 SV=3	Splicing factor, suppressor of white-apricot homolog OS=Mus musculus GN=Sfswap PE=1 SV=2	SFSWAP	0.52			1.987			0.615			0.781713	0.91296	0.786621	1.31966	1.20695	1.40197	0.907111	0.897238	0.866597	0.665206			1.50569			0.677977			2.22086		2.2635		0.981163
F1RFR1	640	S	Uncharacterized protein	Serine/threonine-protein kinase ULK1 OS=Homo sapiens GN=ULK1 PE=1 SV=2	Serine/threonine-protein kinase ULK1 OS=Mus musculus GN=Ulk1 PE=1 SV=1	ULK1										1.17507			0.683255			1.12974
F1RFR1	625	S	Uncharacterized protein	Serine/threonine-protein kinase ULK1 OS=Homo sapiens GN=ULK1 PE=1 SV=2	Serine/threonine-protein kinase ULK1 OS=Mus musculus GN=Ulk1 PE=1 SV=1	ULK1		0.494	0.657		2.107	1.663		0.566	0.713	1.17507			0.683255			1.12974
F1RFR1	558	S	Uncharacterized protein	Serine/threonine-protein kinase ULK1 OS=Homo sapiens GN=ULK1 PE=1 SV=2	Serine/threonine-protein kinase ULK1 OS=Mus musculus GN=Ulk1 PE=1 SV=1	ULK1	0.605		0.699	1.762		1.534	0.729		0.794	1.17507			0.683255			1.12974			0.514862			2.57883			0.645282			3.99644		5.00878		0.797887
F1RFR7	96	S	Uncharacterized protein	Chromatin complexes subunit BAP18 OS=Homo sapiens GN=BAP18 PE=1 SV=1	Chromatin complexes subunit BAP18 OS=Mus musculus GN=Bap18 PE=1 SV=1	C12H17orf49	0.564	0.682	0.55	1.906	1.759	1.907	0.644	0.68	0.586	1.0858	1.05776	1.08647	0.9016	0.935236	0.966397	1.01159	1.00847	1.0322	0.519434	0.64476	0.506228	2.11402	1.88081	1.97331	0.636625	0.674286	0.567717	3.17686	0.000525113	3.57283	0.000168789	0.889171	0.275589
F1RFS8	160	S	Uncharacterized protein	Casein kinase II subunit alpha' OS=Homo sapiens GN=CSNK2A2 PE=1 SV=1	Casein kinase II subunit alpha' OS=Mus musculus GN=Csnk2a2 PE=1 SV=1	CSNK2A2	0.726			1.155			1.133			1.06502	1.03744	1.10653	0.845603	0.835606	0.877608	1.08182	1.11068	1.02462	0.681677			1.36589			1.04731			1.30419		2.00372		0.650884
F1RFT3	189	T	Uncharacterized protein	Proline-, glutamic acid- and leucine-rich protein 1 OS=Homo sapiens GN=PELP1 PE=1 SV=2	Proline-, glutamic acid- and leucine-rich protein 1 OS=Mus musculus GN=Pelp1 PE=1 SV=2	LOC100516108	0.542	0.528	0.606	1.976	2.029	1.844	0.604	0.6	0.591	1.06039	0.992278	0.985093	0.959701	1.08924	0.974883	0.981657	0.928383	0.96495	0.511133	0.532109	0.615171	2.05898	1.86277	1.89151	0.615286	0.646285	0.612467	3.10199	0.00165553	3.50531	0.000266486	0.884941	0.141301
F1RFT3	91	T	Uncharacterized protein	Proline-, glutamic acid- and leucine-rich protein 1 OS=Homo sapiens GN=PELP1 PE=1 SV=2	Proline-, glutamic acid- and leucine-rich protein 1 OS=Mus musculus GN=Pelp1 PE=1 SV=2	LOC100516108	0.58			1.685			0.817			1.06039	0.992278	0.985093	0.959701	1.08924	0.974883	0.981657	0.928383	0.96495	0.546969			1.75576			0.832266			2.10961		3.20997		0.657205
F1RFW9	120	T	Uncharacterized protein	Transcriptional repressor p66-beta OS=Homo sapiens GN=GATAD2B PE=1 SV=1	Transcriptional repressor p66-beta OS=Mus musculus GN=Gatad2b PE=1 SV=1	GATAD2B	0.698	0.603		1.645	1.796		0.742	0.722		0.860242	1.01012	0.940702	1.16199	1.08528	1.10117	0.935072	0.927401	0.914264	0.8114	0.59696		1.41567	1.65488		0.793522	0.77852		1.95323	0.0996598	2.18023	0.0362646	0.895879	0.584697
F1RFW9	486	S	Uncharacterized protein	Transcriptional repressor p66-beta OS=Homo sapiens GN=GATAD2B PE=1 SV=1	Transcriptional repressor p66-beta OS=Mus musculus GN=Gatad2b PE=1 SV=1	GATAD2B	0.603	0.66	0.744	1.863	1.652	1.535	0.646	0.788	0.752	0.860242	1.01012	0.940702	1.16199	1.08528	1.10117	0.935072	0.927401	0.914264	0.700966	0.653389	0.790899	1.60328	1.52219	1.39397	0.690856	0.849686	0.82252	1.91254	0.00095832	2.10672	0.000851562	0.907828	0.318822
F1RFW9	338	S	Uncharacterized protein	Transcriptional repressor p66-beta OS=Homo sapiens GN=GATAD2B PE=1 SV=1	Transcriptional repressor p66-beta OS=Mus musculus GN=Gatad2b PE=1 SV=1	GATAD2B	0.663			1.766			0.672			0.860242	1.01012	0.940702	1.16199	1.08528	1.10117	0.935072	0.927401	0.914264	0.770714			1.51981			0.718661			2.11477		1.97195		1.07243
F1RFW9	129	S	Uncharacterized protein	Transcriptional repressor p66-beta OS=Homo sapiens GN=GATAD2B PE=1 SV=1	Transcriptional repressor p66-beta OS=Mus musculus GN=Gatad2b PE=1 SV=1	GATAD2B	0.595		0.651	1.859		1.668	0.657		0.715	0.860242	1.01012	0.940702	1.16199	1.08528	1.10117	0.935072	0.927401	0.914264	0.691666		0.692036	1.59984		1.51475	0.70262		0.78205	2.09784	0.00515726	2.25091	0.0312674	0.931994	0.424351
F1RFW9	122	S	Uncharacterized protein	Transcriptional repressor p66-beta OS=Homo sapiens GN=GATAD2B PE=1 SV=1	Transcriptional repressor p66-beta OS=Mus musculus GN=Gatad2b PE=1 SV=1	GATAD2B	0.691	0.632	0.576	1.655	1.679	1.752	0.742	0.792	0.705	0.860242	1.01012	0.940702	1.16199	1.08528	1.10117	0.935072	0.927401	0.914264	0.803263	0.625669	0.612309	1.42428	1.54707	1.59104	0.793522	0.854	0.771112	1.88635	0.00115185	2.2351	0.000555389	0.843964	0.166966
F1RFW9	135	S	Uncharacterized protein	Transcriptional repressor p66-beta OS=Homo sapiens GN=GATAD2B PE=1 SV=1	Transcriptional repressor p66-beta OS=Mus musculus GN=Gatad2b PE=1 SV=1	GATAD2B	0.589	0.514	0.669	1.896	1.913	1.618	0.63	0.708	0.744	0.860242	1.01012	0.940702	1.16199	1.08528	1.10117	0.935072	0.927401	0.914264	0.684691	0.508851	0.711171	1.63168	1.76268	1.46935	0.673745	0.763424	0.813769	2.16075	0.00313421	2.55351	0.0010585	0.846187	0.213072
F1RFY6	1092	S	Uncharacterized protein	Kinesin-like protein KIF1C OS=Homo sapiens GN=KIF1C PE=1 SV=3	Kinesin-like protein KIF1C OS=Mus musculus GN=Kif1c PE=1 SV=2	KIF1C												1.12653			0.877924			1.00606
F1RFY6	915	S	Uncharacterized protein	Kinesin-like protein KIF1C OS=Homo sapiens GN=KIF1C PE=1 SV=3	Kinesin-like protein KIF1C OS=Mus musculus GN=Kif1c PE=1 SV=2	KIF1C	0.83		0.792	1.399		1.421	0.833		0.814			1.12653			0.877924			1.00606			0.703042			1.61859			0.809101	2.00048		2.30227		0.868918
F1RFY6	676	S	Uncharacterized protein	Kinesin-like protein KIF1C OS=Homo sapiens GN=KIF1C PE=1 SV=3	Kinesin-like protein KIF1C OS=Mus musculus GN=Kif1c PE=1 SV=2	KIF1C	0.627	0.584	0.682	1.695	1.805	1.478	0.765	0.732	0.861			1.12653			0.877924			1.00606			0.605397			1.68352			0.855818	1.96714		2.78085		0.70739
F1RG01	294	S	Uncharacterized protein	Protein cramped-like OS=Homo sapiens GN=CRAMP1 PE=1 SV=3	Protein cramped-like OS=Mus musculus GN=Cramp1 PE=1 SV=3	CRAMP1	0.789	0.774	0.773	1.357	1.423	1.31	0.904	0.87	0.934
F1RG04	244	S	Uncharacterized protein	Coiled-coil domain-containing protein 6 OS=Homo sapiens GN=CCDC6 PE=1 SV=2	Coiled-coil domain-containing protein 6 OS=Mus musculus GN=Ccdc6 PE=1 SV=1	CCDC6	0.716			1.674			0.702					1.05744			0.887597			1.08231
F1RG04	248	S	Uncharacterized protein	Coiled-coil domain-containing protein 6 OS=Homo sapiens GN=CCDC6 PE=1 SV=2	Coiled-coil domain-containing protein 6 OS=Mus musculus GN=Ccdc6 PE=1 SV=1	CCDC6	0.637	0.545	0.597	1.831	1.937	1.86	0.641	0.659	0.586			1.05744			0.887597			1.08231			0.564571			2.09554			0.541437	3.87034		3.71175		1.04273
F1RG04	423	S	Uncharacterized protein	Coiled-coil domain-containing protein 6 OS=Homo sapiens GN=CCDC6 PE=1 SV=2	Coiled-coil domain-containing protein 6 OS=Mus musculus GN=Ccdc6 PE=1 SV=1	CCDC6	0.67	0.604	0.57	1.561	1.77	1.792	0.84	0.742	0.674			1.05744			0.887597			1.08231			0.539038			2.01893			0.622744	3.24199		3.74544		0.865584
F1RG09	52	S	Chloride channel protein			LOC100626534	0.771			1.474			0.823			0.99485	1.24833	1.16955	0.804004	0.785311	0.760678	1.18404	0.961842	1.08351	0.774991			1.83332			0.695077			2.63758		2.36561		1.11497
F1RG15	366	S	Uncharacterized protein	C-Jun-amino-terminal kinase-interacting protein 3 OS=Homo sapiens GN=MAPK8IP3 PE=1 SV=3	C-Jun-amino-terminal kinase-interacting protein 3 OS=Mus musculus GN=Mapk8ip3 PE=1 SV=1	MAPK8IP3	0.677	0.611	0.626	1.67	1.783	1.611	0.741	0.724	0.79	1.10409		1.18676	0.66832		0.678912	1.2083		1.14918	0.613174		0.527485	2.4988		2.37292	0.613256		0.687444	3.74546	0.00450685	4.27097	0.00306939	0.876958	0.295801
F1RG16	104	S	Uncharacterized protein	Heterogeneous nuclear ribonucleoprotein F OS=Homo sapiens GN=HNRNPF PE=1 SV=3	Heterogeneous nuclear ribonucleoprotein F OS=Mus musculus GN=Hnrnpf PE=1 SV=3	HNRNPF	0.767	0.702		1.399	1.684		0.889	0.723		1.11703	1.10263	1.09227	0.785853	0.812487	0.786595	1.09469	1.04914	1.11581	0.686643	0.636659		1.78023	2.07265		0.812099	0.689136		2.56647	0.0473036	2.91156	0.0663587	0.881476	0.365093
F1RG16	306	Y	Uncharacterized protein	Heterogeneous nuclear ribonucleoprotein F OS=Homo sapiens GN=HNRNPF PE=1 SV=3	Heterogeneous nuclear ribonucleoprotein F OS=Mus musculus GN=Hnrnpf PE=1 SV=3	HNRNPF	0.764			1.428			0.866			1.11703	1.10263	1.09227	0.785853	0.812487	0.786595	1.09469	1.04914	1.11581	0.683958			1.81713			0.791088			2.297		2.65679		0.864578
F1RG16	161	S	Uncharacterized protein	Heterogeneous nuclear ribonucleoprotein F OS=Homo sapiens GN=HNRNPF PE=1 SV=3	Heterogeneous nuclear ribonucleoprotein F OS=Mus musculus GN=Hnrnpf PE=1 SV=3	HNRNPF	1.028		1.163	0.891		0.625	1.082		1.211	1.11703	1.10263	1.09227	0.785853	0.812487	0.786595	1.09469	1.04914	1.11581	0.920299		1.06475	1.1338		0.794564	0.988404		1.08531	0.929907	0.743406	0.971443	0.897554	0.957244	0.667212
F1RG16	310	S	Uncharacterized protein	Heterogeneous nuclear ribonucleoprotein F OS=Homo sapiens GN=HNRNPF PE=1 SV=3	Heterogeneous nuclear ribonucleoprotein F OS=Mus musculus GN=Hnrnpf PE=1 SV=3	HNRNPF	0.773	0.696		1.47	1.48		0.823	0.897		1.11703	1.10263	1.09227	0.785853	0.812487	0.786595	1.09469	1.04914	1.11581	0.692015	0.631218		1.87058	1.82157		0.751808	0.854986		2.29783	0.0114736	2.79025	0.00137813	0.823523	0.17032
F1RG16	23	S	Uncharacterized protein	Heterogeneous nuclear ribonucleoprotein F OS=Homo sapiens GN=HNRNPF PE=1 SV=3	Heterogeneous nuclear ribonucleoprotein F OS=Mus musculus GN=Hnrnpf PE=1 SV=3	HNRNPF	0.583		0.782	1.933		1.477	0.604		0.771	1.11703	1.10263	1.09227	0.785853	0.812487	0.786595	1.09469	1.04914	1.11581	0.521921		0.715938	2.45975		1.87771	0.551752		0.690979	3.49026	0.103177	3.504	0.0917162	0.996079	0.98574
F1RG29	254	S	Cytosolic Fe-S cluster assembly factor NUBP2			NUBP2	0.585	0.651	0.687	1.862	1.501	1.42	0.662	0.921	0.911	1.0582	1.08989	1.12588	0.819426	0.904777	0.741292	1.11201	1.00163	1.14222	0.552826	0.59731	0.610187	2.27232	1.65897	1.91558	0.59532	0.919498	0.797571	2.5285	0.00953784	3.32148	0.0159034	0.761257	0.187546
F1RG33	69	S	Uncharacterized protein	Chromosome transmission fidelity protein 18 homolog OS=Homo sapiens GN=CHTF18 PE=1 SV=1	Chromosome transmission fidelity protein 18 homolog OS=Mus musculus GN=Chtf18 PE=1 SV=2	CHTF18	0.714	0.736	0.698	1.797	1.635	1.66	0.598	0.732	0.679	0.993146	0.955705	0.990612	0.920504	1.20479	1.05033	1.05858	0.847168	0.930371	0.718928	0.770112	0.704615	1.95219	1.35708	1.58045	0.564907	0.864055	0.729816	2.26504	0.0191824	2.22903	0.0338812	1.01616	0.906761
F1RG33	128	S	Uncharacterized protein	Chromosome transmission fidelity protein 18 homolog OS=Homo sapiens GN=CHTF18 PE=1 SV=1	Chromosome transmission fidelity protein 18 homolog OS=Mus musculus GN=Chtf18 PE=1 SV=2	CHTF18	0.758	0.78	0.893	1.6	1.493	1.316	0.726	0.808	0.819	0.993146	0.955705	0.990612	0.920504	1.20479	1.05033	1.05858	0.847168	0.930371	0.763231	0.816151	0.901463	1.73818	1.23922	1.25294	0.685824	0.953766	0.880294	1.67878	0.0547877	1.7052	0.0634329	0.984508	0.893757
F1RG35	23	S	Uncharacterized protein	E3 ubiquitin-protein ligase CHIP OS=Homo sapiens GN=STUB1 PE=1 SV=2	STIP1 homology and U box-containing protein 1 OS=Mus musculus GN=Stub1 PE=1 SV=1	STUB1	0.818	0.883	0.943	1.415	1.237	1.142	0.828	0.925	0.934	1.08547	1.11844	0.992541	0.915602	0.922807	0.984909	1.0298	0.988006	1.01429	0.753589	0.789489	0.950087	1.54543	1.34048	1.1595	0.804039	0.936229	0.920842	1.52019	0.0404453	1.6226	0.0252543	0.936889	0.493238
F1RG35	19	S	Uncharacterized protein	E3 ubiquitin-protein ligase CHIP OS=Homo sapiens GN=STUB1 PE=1 SV=2	STIP1 homology and U box-containing protein 1 OS=Mus musculus GN=Stub1 PE=1 SV=1	STUB1	0.711	0.781	0.704	1.589	1.521	1.542	0.778	0.784	0.783	1.08547	1.11844	0.992541	0.915602	0.922807	0.984909	1.0298	0.988006	1.01429	0.655015	0.698291	0.709291	1.73547	1.64823	1.56563	0.755486	0.793518	0.771969	2.13244	0.0021121	2.39956	0.00106539	0.888678	0.0166932
F1RG37	470	S	Uncharacterized protein	WD repeat-containing protein 24 OS=Homo sapiens GN=WDR24 PE=1 SV=1	WD repeat-containing protein 24 OS=Mus musculus GN=Wdr24 PE=1 SV=1	WDR24	0.556			1.916			0.641			0.980019			0.927828			1.08431			0.567336			2.06504			0.591162			3.49319		3.63989		0.959697
F1RG37	484	S	Uncharacterized protein	WD repeat-containing protein 24 OS=Homo sapiens GN=WDR24 PE=1 SV=1	WD repeat-containing protein 24 OS=Mus musculus GN=Wdr24 PE=1 SV=1	WDR24	0.505		0.648	1.924		1.657	0.683		0.728	0.980019			0.927828			1.08431			0.515296			2.07366			0.629896			3.29207		4.02421		0.818065
F1RG40	1132	S	Uncharacterized protein	Nuclear pore complex protein Nup133 OS=Homo sapiens GN=NUP133 PE=1 SV=2	Nuclear pore complex protein Nup133 OS=Mus musculus GN=Nup133 PE=1 SV=2	NUP133	0.896			1.209			0.932			1.1417	1.12062	1.04198	0.763283	0.785336	0.854937	1.09864	1.09038	1.10592	0.784793			1.58395			0.848319			1.86716		2.0183		0.925115
F1RG60	314	S	Septin 1			SEPT1	1.238			0.798			0.968
F1RG61	22	S	Uncharacterized protein	TBC1 domain family member 10B OS=Homo sapiens GN=TBC1D10B PE=1 SV=3	TBC1 domain family member 10B OS=Mus musculus GN=Tbc1d10b PE=1 SV=2	TBC1D10B	0.618	0.572	0.538	1.814	1.761	1.851	0.673	0.781	0.648	0.929261	1.01622	0.850256	1.04285	0.902213	1.37031	0.964326	1.08667	0.768052	0.665045	0.562868	0.632751	1.73947	1.95187	1.35079	0.697897	0.718711	0.843693	2.23073	0.027853	2.70985	0.0237478	0.823193	0.0809483
F1RG61	682	S	Uncharacterized protein	TBC1 domain family member 10B OS=Homo sapiens GN=TBC1D10B PE=1 SV=3	TBC1 domain family member 10B OS=Mus musculus GN=Tbc1d10b PE=1 SV=2	TBC1D10B	0.601	0.588	0.592	1.86	1.914	1.822	0.649	0.638	0.625	0.929261	1.01622	0.850256	1.04285	0.902213	1.37031	0.964326	1.08667	0.768052	0.64675	0.578613	0.696261	1.78358	2.12145	1.32963	0.673009	0.587116	0.813747	2.5241	0.0358549	2.72408	0.0380096	0.926588	0.543889
F1RG61	133	S	Uncharacterized protein	TBC1 domain family member 10B OS=Homo sapiens GN=TBC1D10B PE=1 SV=3	TBC1 domain family member 10B OS=Mus musculus GN=Tbc1d10b PE=1 SV=2	TBC1D10B	0.622			1.911			0.586			0.929261	1.01622	0.850256	1.04285	0.902213	1.37031	0.964326	1.08667	0.768052	0.669349			1.83248			0.607678			3.01555		2.73771		1.10149
F1RG63	61	S	Selenide, water dikinase 2			SEPHS2	0.732		0.77	1.407		1.396	0.913		0.857		1.22646			0.619967			1.12768
F1RG67	197	S	Uncharacterized protein	CD2 antigen cytoplasmic tail-binding protein 2 OS=Homo sapiens GN=CD2BP2 PE=1 SV=1	CD2 antigen cytoplasmic tail-binding protein 2 OS=Mus musculus GN=Cd2bp2 PE=1 SV=1	CD2BP2	0.94	0.85	0.877	1.222	1.25	1.326	0.881	0.944	0.824	0.918299	0.896237	0.939644	1.1683	1.27971	1.14028	0.920714	0.856873	0.915446	1.02363	0.94841	0.933332	1.04597	0.976783	1.16287	0.956866	1.10168	0.900108	1.07671	0.403309	1.09646	0.223891	0.981992	0.80683
F1RG67	196	S	Uncharacterized protein	CD2 antigen cytoplasmic tail-binding protein 2 OS=Homo sapiens GN=CD2BP2 PE=1 SV=1	CD2 antigen cytoplasmic tail-binding protein 2 OS=Mus musculus GN=Cd2bp2 PE=1 SV=1	CD2BP2	0.926			1.234			0.884			0.918299	0.896237	0.939644	1.1683	1.27971	1.14028	0.920714	0.856873	0.915446	1.00839			1.05624			0.960124			1.10011		1.04745		1.05027
F1RG71	391	S	Tuftelin-interacting protein 11			TFIP11	0.788	0.705	0.783	1.541	1.564	1.456	0.749	0.819	0.791	1.11149	1.13994	1.07531	0.876541	0.737059	0.955252	1.00779	0.983924	0.975822	0.708958	0.618453	0.728159	1.75805	2.12195	1.52421	0.743213	0.832382	0.810599	2.26478	0.0262905	2.62905	0.0202383	0.861443	0.0663148
F1RG71	59	S	Tuftelin-interacting protein 11			TFIP11	0.764	0.654	0.779	1.55	1.684	1.417	0.764	0.767	0.829	1.11149	1.13994	1.07531	0.876541	0.737059	0.955252	1.00779	0.983924	0.975822	0.687366	0.573714	0.72444	1.76831	2.28475	1.48338	0.758097	0.779532	0.84954	2.31925	0.0447534	2.78841	0.0331279	0.831746	0.078335
F1RG71	210	S	Tuftelin-interacting protein 11			TFIP11	0.65	0.592	0.644	1.768	1.679	1.817	0.683	0.83	0.584	1.11149	1.13994	1.07531	0.876541	0.737059	0.955252	1.00779	0.983924	0.975822	0.584801	0.519325	0.598895	2.01702	2.27797	1.90212	0.677723	0.843561	0.59847	2.9235	0.00107991	3.63889	0.00396017	0.803405	0.186091
F1RG73	363	T	Uncharacterized protein	Proline-rich protein 14 OS=Homo sapiens GN=PRR14 PE=1 SV=1	Proline-rich protein 14 OS=Mus musculus GN=Prr14 PE=2 SV=1	PRR14	1.055	0.92	1.104	1.029	0.965	0.854	0.939	1.113	1.052	1.0637	1.07009	1.04623	0.779358	0.934762	0.799574	1.14319	0.993329	1.01559	0.991825	0.859745	1.05522	1.32032	1.03235	1.06807	0.821388	1.12047	1.03585	1.14878	0.309665	1.17681	0.198428	0.976182	0.83618
F1RG73	304	S	Uncharacterized protein	Proline-rich protein 14 OS=Homo sapiens GN=PRR14 PE=1 SV=1	Proline-rich protein 14 OS=Mus musculus GN=Prr14 PE=2 SV=1	PRR14	0.741	0.769	0.65	1.477	1.232	1.698	0.847	1.032	0.687	1.0637	1.07009	1.04623	0.779358	0.934762	0.799574	1.14319	0.993329	1.01559	0.696628	0.718634	0.62128	1.89515	1.31798	2.12363	0.740911	1.03893	0.676455	2.17269	0.0396157	2.6205	0.0425235	0.829111	0.33629
F1RG73	333	S	Uncharacterized protein	Proline-rich protein 14 OS=Homo sapiens GN=PRR14 PE=1 SV=1	Proline-rich protein 14 OS=Mus musculus GN=Prr14 PE=2 SV=1	PRR14	0.787	0.77	0.841	1.453	1.302	1.339	0.825	0.974	0.846	1.0637	1.07009	1.04623	0.779358	0.934762	0.799574	1.14319	0.993329	1.01559	0.739873	0.719569	0.803841	1.86436	1.39287	1.67464	0.721667	0.980541	0.833014	1.94534	0.0133343	2.17908	0.0200113	0.892736	0.351524
F1RG73	93	S	Uncharacterized protein	Proline-rich protein 14 OS=Homo sapiens GN=PRR14 PE=1 SV=1	Proline-rich protein 14 OS=Mus musculus GN=Prr14 PE=2 SV=1	PRR14	0.869	0.763	0.847	1.425	1.286	1.287	0.774	0.995	0.886	1.0637	1.07009	1.04623	0.779358	0.934762	0.799574	1.14319	0.993329	1.01559	0.816963	0.713027	0.809575	1.82843	1.37575	1.60961	0.677054	1.00168	0.8724	1.88692	0.0118475	2.05756	0.0189947	0.917068	0.541181
F1RG73	125	S	Uncharacterized protein	Proline-rich protein 14 OS=Homo sapiens GN=PRR14 PE=1 SV=1	Proline-rich protein 14 OS=Mus musculus GN=Prr14 PE=2 SV=1	PRR14	0.771			1.387			0.896			1.0637	1.07009	1.04623	0.779358	0.934762	0.799574	1.14319	0.993329	1.01559	0.724831			1.77967			0.783774			2.27064		2.45529		0.924797
F1RG73	29	S	Uncharacterized protein	Proline-rich protein 14 OS=Homo sapiens GN=PRR14 PE=1 SV=1	Proline-rich protein 14 OS=Mus musculus GN=Prr14 PE=2 SV=1	PRR14	0.825			1.118			1.076			1.0637	1.07009	1.04623	0.779358	0.934762	0.799574	1.14319	0.993329	1.01559	0.775598			1.43451			0.941228			1.52409		1.84956		0.824027
F1RG74	274	S	Uncharacterized protein	Helicase SRCAP OS=Homo sapiens GN=SRCAP PE=1 SV=3	E1A-binding protein p400 OS=Mus musculus GN=Ep400 PE=1 SV=3	SRCAP	0.639	0.737		1.712	1.608		0.738	0.753		1.10097	0.981161	1.06687	0.813751	1.02958	0.915846	1.05394	0.969205	1.04011	0.580399	0.751151		2.10384	1.56181		0.700229	0.776925		2.48156	0.148584	2.75292	0.120027	0.901429	0.547223
F1RG74	1859	S	Uncharacterized protein	Helicase SRCAP OS=Homo sapiens GN=SRCAP PE=1 SV=3	E1A-binding protein p400 OS=Mus musculus GN=Ep400 PE=1 SV=3	SRCAP	0.806	0.779	0.776	1.375	1.34	1.369	0.874	0.936	0.877	1.10097	0.981161	1.06687	0.813751	1.02958	0.915846	1.05394	0.969205	1.04011	0.732084	0.793958	0.727363	1.68971	1.30151	1.49479	0.829269	0.96574	0.843182	1.70041	0.0204824	1.99077	0.018946	0.854148	0.0790142
F1RG79	78	S	Uncharacterized protein	Zinc finger protein 629 OS=Homo sapiens GN=ZNF629 PE=1 SV=2	Zinc finger protein 629 OS=Mus musculus GN=Znf629 PE=2 SV=2	ZNF629	0.671	0.636	0.562	1.724	1.734	1.868	0.701	0.742	0.611	1.03077	1.04465	1.1291	0.87018	1.00643	0.835742	1.09065	0.953422	1.0457	0.65097	0.608814	0.497743	1.9812	1.72291	2.23514	0.642737	0.778249	0.584296	2.9618	0.00626818	3.37932	0.00683609	0.876448	0.326437
F1RG84	464	S	Uncharacterized protein	Histone-lysine N-methyltransferase SETD1A OS=Homo sapiens GN=SETD1A PE=1 SV=3	Histone-lysine N-methyltransferase SETD1B OS=Mus musculus GN=Setd1b PE=1 SV=2	SETD1A	0.657	0.797	0.656	1.78	1.106	1.685	0.666	1.112	0.694	1.18527	1.17328	1.11452	0.689969	0.72587	0.767625	1.13251	1.11188	1.1128	0.554303	0.679291	0.588594	2.57983	1.52369	2.19508	0.588074	1.00011	0.623652	2.84767	0.0326659	3.45661	0.0385107	0.823834	0.431115
F1RG84	508	S	Uncharacterized protein	Histone-lysine N-methyltransferase SETD1A OS=Homo sapiens GN=SETD1A PE=1 SV=3	Histone-lysine N-methyltransferase SETD1B OS=Mus musculus GN=Setd1b PE=1 SV=2	SETD1A	0.819	0.801	0.83	1.412	1.341	1.353	0.83	0.914	0.842	1.18527	1.17328	1.11452	0.689969	0.72587	0.767625	1.13251	1.11188	1.1128	0.690981	0.682701	0.744715	2.04647	1.84744	1.76258	0.732886	0.822035	0.75665	2.44703	0.00299385	2.67017	0.00352054	0.916432	0.129289
F1RG88	202	S	Uncharacterized protein	182 kDa tankyrase-1-binding protein OS=Homo sapiens GN=TNKS1BP1 PE=1 SV=4	182 kDa tankyrase-1-binding protein OS=Mus musculus GN=Tnks1bp1 PE=1 SV=2	KIAA1671	0.612			1.782			0.705
F1RG97	126	S	Uncharacterized protein	B-cell CLL/lymphoma 7 protein family member C OS=Homo sapiens GN=BCL7C PE=1 SV=3	B-cell CLL/lymphoma 7 protein family member C OS=Mus musculus GN=Bcl7c PE=1 SV=1	BCL7C	0.65		0.581	1.755		1.806	0.694		0.65	0.831359			1.23974			0.934838			0.781852			1.41562			0.742374			1.90688		1.81059		1.05318
F1RGB0	888	S	Uncharacterized protein	Protein phosphatase Slingshot homolog 1 OS=Homo sapiens GN=SSH1 PE=1 SV=2	Protein phosphatase Slingshot homolog 1 OS=Mus musculus GN=Ssh1 PE=1 SV=1	SSH1	0.629	0.553		1.844	1.933		0.636	0.656		1.20057			0.833656			0.968814			0.52392			2.21194			0.656473			3.36944		4.22192		0.798083
F1RGB0	939	S	Uncharacterized protein	Protein phosphatase Slingshot homolog 1 OS=Homo sapiens GN=SSH1 PE=1 SV=2	Protein phosphatase Slingshot homolog 1 OS=Mus musculus GN=Ssh1 PE=1 SV=1	SSH1	0.417	0.469	0.438	2.201	2.066	2.111	0.528	0.624	0.5	1.20057			0.833656			0.968814			0.347336			2.64018			0.544996			4.8444		7.60122		0.637319
F1RGB0	444	S	Uncharacterized protein	Protein phosphatase Slingshot homolog 1 OS=Homo sapiens GN=SSH1 PE=1 SV=2	Protein phosphatase Slingshot homolog 1 OS=Mus musculus GN=Ssh1 PE=1 SV=1	SSH1		0.593			1.685			0.822		1.20057			0.833656			0.968814
F1RGD0	501	S	Uncharacterized protein	Synembryn-A OS=Homo sapiens GN=RIC8A PE=1 SV=3	Synembryn-A OS=Mus musculus GN=Ric8a PE=1 SV=2	RIC8A	0.737			1.624			0.725			1.13724	1.01444	0.992999	0.680008	0.810771	0.905555	1.14511	1.05587	1.08353	0.648059			2.38821			0.633127			3.77208		3.68517		1.02358
F1RGD0	435	S	Uncharacterized protein	Synembryn-A OS=Homo sapiens GN=RIC8A PE=1 SV=3	Synembryn-A OS=Mus musculus GN=Ric8a PE=1 SV=2	RIC8A	0.891		0.693	1.1		1.494	1.029		0.837	1.13724	1.01444	0.992999	0.680008	0.810771	0.905555	1.14511	1.05587	1.08353	0.783474		0.697886	1.61763		1.64982	0.898604		0.772472	1.95529	0.0385547	2.20571	0.0154213	0.886471	0.353628
F1RGD1	9	S	Uncharacterized protein	BET1-like protein OS=Homo sapiens GN=BET1L PE=1 SV=1	BET1-like protein OS=Mus musculus GN=Bet1l PE=1 SV=1	BET1L	0.6	0.692		1.832	1.493		0.673	0.89		0.965544	1.16772		1.15937	0.988787		0.885682	0.85625		0.621412	0.592606		1.58016	1.50993		0.759867	1.03942		1.7174	0.118731	2.54535	0.00991759	0.674723	0.280903
F1RGE7	282	T	Uncharacterized protein	Steroid receptor RNA activator 1 OS=Homo sapiens GN=SRA1 PE=1 SV=1	Steroid receptor RNA activator 1 OS=Mus musculus GN=Sra1 PE=1 SV=3	SRA1	0.733	0.612	0.647	1.525	1.839	1.723	0.813	0.677	0.667	1.24348	1.14848	1.12054	0.630031	0.708715	0.804504	1.1149	1.12086	1.08641	0.589477	0.53288	0.577399	2.42052	2.59484	2.14169	0.729216	0.604003	0.613946	3.67562	0.00318341	4.21063	0.00464718	0.872939	0.165446
F1RGE8	1677	S	Uncharacterized protein	Ankyrin repeat and KH domain-containing protein 1 OS=Homo sapiens GN=ANKHD1 PE=1 SV=1	Ankyrin repeat domain-containing protein 17 OS=Mus musculus GN=Ankrd17 PE=1 SV=2	ANKHD1	0.711	0.415	0.801	1.965	2.318	1.725	0.458	0.465	0.525	0.934766	0.971168	0.995403	1.15837	1.11269	0.988883	0.934535	0.929584	1.02	0.760618	0.427321	0.8047	1.69634	2.08324	1.74439	0.490083	0.500224	0.514708	3.67038	0.00799077	2.77219	0.00230432	1.324	0.30551
F1RGE8	2321	T	Uncharacterized protein	Ankyrin repeat and KH domain-containing protein 1 OS=Homo sapiens GN=ANKHD1 PE=1 SV=1	Ankyrin repeat domain-containing protein 17 OS=Mus musculus GN=Ankrd17 PE=1 SV=2	ANKHD1	0.808	0.739		1.579	1.618		0.697	0.744		0.934766	0.971168	0.995403	1.15837	1.11269	0.988883	0.934535	0.929584	1.02	0.864388	0.76094		1.36312	1.45413		0.745826	0.800358		1.82207	0.0137846	1.73334	0.0137573	1.05119	0.586888
F1RGI7	533	S	Uncharacterized protein	Matrin-3 OS=Homo sapiens GN=MATR3 PE=1 SV=2	Matrin-3 OS=Mus musculus GN=Matr3 PE=1 SV=1	MATR3	0.761	0.773	0.799	1.343	1.312	1.022	0.942	0.963	1.176	0.993247	1.00498	0.999015	0.904477	0.944628	0.902772	1.05211	1.01795	1.06683	0.766174	0.769169	0.799788	1.48484	1.38891	1.13207	0.895348	0.946017	1.10233	1.36081	0.0571064	1.71545	0.0328078	0.793266	0.0787138
F1RGI7	276	S	Uncharacterized protein	Matrin-3 OS=Homo sapiens GN=MATR3 PE=1 SV=2	Matrin-3 OS=Mus musculus GN=Matr3 PE=1 SV=1	MATR3	0.874			1.31			0.866			0.993247	1.00498	0.999015	0.904477	0.944628	0.902772	1.05211	1.01795	1.06683	0.879942			1.44835			0.823111			1.7596		1.64596		1.06904
F1RGI7	597	Y	Uncharacterized protein	Matrin-3 OS=Homo sapiens GN=MATR3 PE=1 SV=2	Matrin-3 OS=Mus musculus GN=Matr3 PE=1 SV=1	MATR3	0.897	0.833	0.893	1.169	1.254	1.129	0.966	0.956	0.992	0.993247	1.00498	0.999015	0.904477	0.944628	0.902772	1.05211	1.01795	1.06683	0.903099	0.828871	0.89388	1.29246	1.32751	1.25059	0.918159	0.939141	0.929855	1.38871	0.00219725	1.47402	0.00021347	0.942126	0.14053
F1RGI7	509	S	Uncharacterized protein	Matrin-3 OS=Homo sapiens GN=MATR3 PE=1 SV=2	Matrin-3 OS=Mus musculus GN=Matr3 PE=1 SV=1	MATR3	0.798			1.437			0.828			0.993247	1.00498	0.999015	0.904477	0.944628	0.902772	1.05211	1.01795	1.06683	0.803426			1.58876			0.786993			2.01878		1.97749		1.02088
F1RGI7	9	S	Uncharacterized protein	Matrin-3 OS=Homo sapiens GN=MATR3 PE=1 SV=2	Matrin-3 OS=Mus musculus GN=Matr3 PE=1 SV=1	MATR3	1.167		0.865	0.78		1.023	1.05		1.114	0.993247	1.00498	0.999015	0.904477	0.944628	0.902772	1.05211	1.01795	1.06683	1.17493		0.865853	0.862376		1.13318	0.997999		1.04421	0.977154	0.891717	0.977835	0.922553	0.999303	0.997076
F1RGI7	208	S	Uncharacterized protein	Matrin-3 OS=Homo sapiens GN=MATR3 PE=1 SV=2	Matrin-3 OS=Mus musculus GN=Matr3 PE=1 SV=1	MATR3	0.745			1.489			0.833			0.993247	1.00498	0.999015	0.904477	0.944628	0.902772	1.05211	1.01795	1.06683	0.750065			1.64625			0.791746			2.07927		2.19481		0.947356
F1RGI7	188	S	Uncharacterized protein	Matrin-3 OS=Homo sapiens GN=MATR3 PE=1 SV=2	Matrin-3 OS=Mus musculus GN=Matr3 PE=1 SV=1	MATR3	0.75	0.692	0.682	1.528	1.624	1.631	0.794	0.782	0.72	0.993247	1.00498	0.999015	0.904477	0.944628	0.902772	1.05211	1.01795	1.06683	0.755099	0.68857	0.682672	1.68937	1.7192	1.80666	0.754677	0.768209	0.674895	2.37295	3.31365e-05	2.45268	5.31018e-05	0.967495	0.558929
F1RGI7	511	S	Uncharacterized protein	Matrin-3 OS=Homo sapiens GN=MATR3 PE=1 SV=2	Matrin-3 OS=Mus musculus GN=Matr3 PE=1 SV=1	MATR3	0.89	0.789	0.941	1.275	1.36	1.039	0.881	0.909	1.03	0.993247	1.00498	0.999015	0.904477	0.944628	0.902772	1.05211	1.01795	1.06683	0.896051	0.785089	0.941927	1.40965	1.43972	1.1509	0.837369	0.89297	0.965474	1.48388	0.0283438	1.52504	0.0214161	0.973016	0.70558
F1RGI7	604	S	Uncharacterized protein	Matrin-3 OS=Homo sapiens GN=MATR3 PE=1 SV=2	Matrin-3 OS=Mus musculus GN=Matr3 PE=1 SV=1	MATR3	0.752	0.705	0.793	1.477	1.587	1.4	0.838	0.8	0.832	0.993247	1.00498	0.999015	0.904477	0.944628	0.902772	1.05211	1.01795	1.06683	0.757113	0.701506	0.793782	1.63299	1.68003	1.55078	0.796498	0.785892	0.779878	2.05895	0.00177064	2.15938	9.89829e-05	0.95349	0.30429
F1RGI7	14	S	Uncharacterized protein	Matrin-3 OS=Homo sapiens GN=MATR3 PE=1 SV=2	Matrin-3 OS=Mus musculus GN=Matr3 PE=1 SV=1	MATR3	0.997	0.825	0.952	1.222	1.304	1.073	0.829	0.923	0.988	0.993247	1.00498	0.999015	0.904477	0.944628	0.902772	1.05211	1.01795	1.06683	1.00378	0.820911	0.952938	1.35106	1.38044	1.18856	0.787944	0.906723	0.926105	1.49576	0.00556964	1.4113	0.00940727	1.05985	0.495955
F1RGI7	109	S	Uncharacterized protein	Matrin-3 OS=Homo sapiens GN=MATR3 PE=1 SV=2	Matrin-3 OS=Mus musculus GN=Matr3 PE=1 SV=1	MATR3	0.754			1.368			0.928			0.993247	1.00498	0.999015	0.904477	0.944628	0.902772	1.05211	1.01795	1.06683	0.759127			1.51248			0.882041			1.71475		1.99239		0.860648
F1RGI7	596	S	Uncharacterized protein	Matrin-3 OS=Homo sapiens GN=MATR3 PE=1 SV=2	Matrin-3 OS=Mus musculus GN=Matr3 PE=1 SV=1	MATR3	0.764	0.717	0.805	1.458	1.431	1.348	0.841	0.918	0.869	0.993247	1.00498	0.999015	0.904477	0.944628	0.902772	1.05211	1.01795	1.06683	0.769195	0.713446	0.805793	1.61198	1.51488	1.49318	0.79935	0.901811	0.81456	1.83647	0.00014893	2.01887	0.000122114	0.909653	0.145589
F1RGI7	598	S	Uncharacterized protein	Matrin-3 OS=Homo sapiens GN=MATR3 PE=1 SV=2	Matrin-3 OS=Mus musculus GN=Matr3 PE=1 SV=1	MATR3	0.891	0.773	0.87	1.237	1.412	1.194	0.913	0.882	0.953	0.993247	1.00498	0.999015	0.904477	0.944628	0.902772	1.05211	1.01795	1.06683	0.897058	0.769169	0.870858	1.36764	1.49477	1.32259	0.867784	0.866446	0.893298	1.59275	0.00827618	1.64953	0.00143295	0.965579	0.523107
F1RGI7	150	T	Uncharacterized protein	Matrin-3 OS=Homo sapiens GN=MATR3 PE=1 SV=2	Matrin-3 OS=Mus musculus GN=Matr3 PE=1 SV=1	MATR3	0.927	0.663		0.968	1.664		1.109	0.775		0.993247	1.00498	0.999015	0.904477	0.944628	0.902772	1.05211	1.01795	1.06683	0.933303	0.659714		1.07023	1.76154		1.05408	0.761333		1.55985	0.359054	1.77762	0.298267	0.877497	0.634887
F1RGJ2	652	S	Uncharacterized protein	Catenin alpha-1 OS=Homo sapiens GN=CTNNA1 PE=1 SV=1	Catenin alpha-1 OS=Mus musculus GN=Ctnna1 PE=1 SV=1	CTNNA1	0.563			1.986			0.576			0.946527	0.92428	0.975312	1.08666	1.21984	1.09777	0.938696	0.900093	0.935679	0.594806			1.82761			0.613617			2.97842		3.07262		0.969344
F1RGJ2	641	S	Uncharacterized protein	Catenin alpha-1 OS=Homo sapiens GN=CTNNA1 PE=1 SV=1	Catenin alpha-1 OS=Mus musculus GN=Ctnna1 PE=1 SV=1	CTNNA1	0.591	0.572	0.645	1.875	1.905	1.721	0.646	0.661	0.671	0.946527	0.92428	0.975312	1.08666	1.21984	1.09777	0.938696	0.900093	0.935679	0.624388	0.61886	0.661327	1.72546	1.56168	1.56772	0.688189	0.734368	0.717126	2.26896	0.00218228	2.54905	0.00183018	0.89012	0.0144385
F1RGJ6	436	S	Uncharacterized protein	Protein capicua homolog OS=Homo sapiens GN=CIC PE=1 SV=2	Protein capicua homolog OS=Mus musculus GN=Cic PE=1 SV=2	CIC	0.655		0.698	1.816		1.587	0.637		0.745
F1RGJ6	902	S	Uncharacterized protein	Protein capicua homolog OS=Homo sapiens GN=CIC PE=1 SV=2	Protein capicua homolog OS=Mus musculus GN=Cic PE=1 SV=2	CIC	0.681	0.564	0.701	1.625	1.839	1.573	0.775	0.723	0.755
F1RGJ6	496	S	Uncharacterized protein	Protein capicua homolog OS=Homo sapiens GN=CIC PE=1 SV=2	Protein capicua homolog OS=Mus musculus GN=Cic PE=1 SV=2	CIC	0.341	0.466	0.451	2.132	2.046	2.155	0.657	0.642	0.448
F1RGL8	162	S	Uncharacterized protein	Rab GTPase-binding effector protein 1 OS=Homo sapiens GN=RABEP1 PE=1 SV=2	Rab GTPase-binding effector protein 1 OS=Mus musculus GN=Rabep1 PE=1 SV=2	---	0.867	0.815		1.212	1.377		0.956	0.872		1.18181	1.13175	1.09113	0.679201	0.626311	0.783589	1.10182	1.1919	1.13656	0.73362	0.720123		1.78445	2.19859		0.867655	0.731608		2.49055	0.0842372	2.73985	0.103017	0.909009	0.477444
F1RGM8	771	S	Uncharacterized protein	Double-stranded RNA-specific adenosine deaminase OS=Homo sapiens GN=ADAR PE=1 SV=4	Double-stranded RNA-specific adenosine deaminase OS=Mus musculus GN=Adar PE=1 SV=2	ADAR	0.726	0.804	0.771	1.489	1.388	1.437	0.85	0.871	0.818	1.06095	1.00266	1.09194	0.81984	0.932847	0.809596	1.06006	1.05124	1.12852	0.684293	0.801866	0.706085	1.81621	1.48792	1.77496	0.801838	0.828548	0.72484	2.15652	0.00820477	2.31684	0.00623033	0.930799	0.319164
F1RGN4	665	S	Uncharacterized protein	Protein moonraker OS=Homo sapiens GN=KIAA0753 PE=1 SV=3	Protein moonraker OS=Mus musculus GN=Kiaa0753 PE=2 SV=2	KIAA0753		0.309	0.424		2.546	2.178		0.377	0.451
F1RGP1	1286	S	Uncharacterized protein	Myb-binding protein 1A OS=Homo sapiens GN=MYBBP1A PE=1 SV=2	Myb-binding protein 1A OS=Mus musculus GN=Mybbp1a PE=1 SV=2	MYBBP1A	0.753	0.665	0.638	1.735	1.723	1.889	0.616	0.725	0.524	1.06845	1.12432	1.07649	0.948335	0.94622	0.911838	0.968678	0.923355	1.00598	0.70476	0.591466	0.592668	1.82952	1.82093	2.07164	0.635918	0.78518	0.520883	2.94652	0.000369108	3.02933	0.00109032	0.972663	0.849201
F1RGP4	302	T	Uncharacterized protein	Pygopus homolog 2 OS=Homo sapiens GN=PYGO2 PE=1 SV=2	Pygopus homolog 1 OS=Mus musculus GN=Pygo1 PE=1 SV=1	PYGO2	0.582	0.464	0.416	1.789	2.158	2.176	0.727	0.552	0.459	0.945212		0.804467	1.03378		1.22651	1.01919		0.952952	0.615735		0.517113	1.73054		1.77414	0.713314		0.481661	2.93284	0.0559136	3.09369	0.0101338	0.948009	0.837295
F1RGQ6	460	S	Uncharacterized protein	Rabankyrin-5 OS=Homo sapiens GN=ANKFY1 PE=1 SV=2	Rabankyrin-5 OS=Mus musculus GN=Ankfy1 PE=1 SV=2	ANKFY1	0.888			1.248			0.906			1.18952	1.13346	1.14297	0.624121	0.681499	0.693315	1.15578	1.16308	1.15503	0.746522			1.99961			0.783883			2.55091		2.67857		0.952339
F1RGS3	495	Y	Uncharacterized protein	Nuclear cap-binding protein subunit 3 OS=Homo sapiens GN=NCBP3 PE=1 SV=2	Nuclear cap-binding protein subunit 3 OS=Mus musculus GN=Ncbp3 PE=1 SV=1	NCBP3	0.569			1.888			0.655			1.05955	1.11205	1.07798	0.877576	0.790835	0.853289	1.04604	1.08181	1.07412	0.53702			2.15138			0.626169			3.43579		4.00615		0.857628
F1RGS3	496	S	Uncharacterized protein	Nuclear cap-binding protein subunit 3 OS=Homo sapiens GN=NCBP3 PE=1 SV=2	Nuclear cap-binding protein subunit 3 OS=Mus musculus GN=Ncbp3 PE=1 SV=1	NCBP3	0.644	0.56	0.652	1.789	1.933	1.785	0.67	0.649	0.605	1.05955	1.11205	1.07798	0.877576	0.790835	0.853289	1.04604	1.08181	1.07412	0.607805	0.503575	0.604833	2.03857	2.44425	2.09191	0.640508	0.599921	0.563252	3.64517	0.00520919	3.83095	0.00387796	0.951506	0.521141
F1RGS7	166	S	Uncharacterized protein	Protein FAM89A OS=Homo sapiens GN=FAM89A PE=1 SV=1	Protein FAM89A OS=Mus musculus GN=Fam89a PE=2 SV=2	FAM89A	0.711	0.774		1.697	1.634		0.686	0.697
F1RGT2	125	S	Uncharacterized protein	Egl nine homolog 1 OS=Homo sapiens GN=EGLN1 PE=1 SV=1	Egl nine homolog 1 OS=Mus musculus GN=Egln1 PE=1 SV=2	EGLN1	0.829	0.97	0.864	1.317	1.065	1.286	0.902	0.985	0.873	1.30736	1.3301	1.24455	0.350576	0.335112	0.445195	1.32289	1.28936	1.35028	0.6341	0.729266	0.694229	3.75668	3.17804	2.88862	0.681841	0.763943	0.646533	4.69496	0.00870254	4.77418	0.00895423	0.983405	0.808303
F1RGV0	605	T	Uncharacterized protein	Mitogen-activated protein kinase kinase kinase MLK4 OS=Homo sapiens GN=MLK4 PE=1 SV=1	Mitogen-activated protein kinase kinase kinase MLK4 OS=Mus musculus GN=Mlk4 PE=1 SV=2	LOC100154002
F1RGV0	627	S	Uncharacterized protein	Mitogen-activated protein kinase kinase kinase MLK4 OS=Homo sapiens GN=MLK4 PE=1 SV=1	Mitogen-activated protein kinase kinase kinase MLK4 OS=Mus musculus GN=Mlk4 PE=1 SV=2	LOC100154002	0.777	0.754	0.823	1.482	1.402	1.224	0.809	0.907	0.967
F1RGX3	363	S	Uncharacterized protein	Putative RNA-binding protein Luc7-like 1 OS=Homo sapiens GN=LUC7L PE=1 SV=1	Putative RNA-binding protein Luc7-like 1 OS=Mus musculus GN=Luc7l PE=1 SV=2	LUC7L	0.483	0.406	0.541	2.155	2.289	1.967	0.506	0.498	0.54	0.724535	0.688448	0.656252	1.6573	1.61247	1.63595	0.681079	0.736006	0.68066	0.666635	0.589732	0.824378	1.30031	1.41956	1.20236	0.742939	0.676625	0.793347	1.77243	0.00376733	1.88501	0.00285638	0.940275	0.60799
F1RH55	121	S	Uncharacterized protein	Inactive serine/threonine-protein kinase VRK3 OS=Homo sapiens GN=VRK3 PE=1 SV=2	Inactive serine/threonine-protein kinase VRK3 OS=Mus musculus GN=Vrk3 PE=1 SV=2	VRK3	0.547			2.07			0.519			1.15405	1.0685	0.886199	0.793718	1.01243	1.10693	1.04789	0.926287	0.997403	0.473984			2.60798			0.495281			5.26566		5.50226		0.957
F1RH75	804	S	Uncharacterized protein	Lysine-specific demethylase 3B OS=Homo sapiens GN=KDM3B PE=1 SV=2	Lysine-specific demethylase 3B OS=Mus musculus GN=Kdm3b PE=1 SV=2	KDM3B	0.754	0.761	0.817	1.43	1.437	1.414	0.875	0.871	0.798	1.09357	1.12781	1.04681	0.84535	0.876107	0.911757	1.03355	1.00162	1.06122	0.689484	0.674761	0.780465	1.69161	1.64021	1.55085	0.846593	0.869594	0.751966	1.97827	0.000138404	2.27661	8.99595e-05	0.868954	0.0925046
F1RH79	264	T	Uncharacterized protein	Bromodomain-containing protein 8 OS=Homo sapiens GN=BRD8 PE=1 SV=2	Bromodomain-containing protein 8 OS=Mus musculus GN=Brd8 PE=1 SV=2	BRD8	0.473	0.34	0.266	1.978	2.387	2.395	0.665	0.478	0.394	0.664332	0.83964	0.837053	1.64123	1.26225	1.17974	0.720202	0.915631	0.969774	0.711994	0.404936	0.317782	1.20519	1.89106	2.03011	0.923352	0.522045	0.40628	2.7685	0.0299797	3.5731	0.024821	0.774817	0.52209
F1RH79	268	S	Uncharacterized protein	Bromodomain-containing protein 8 OS=Homo sapiens GN=BRD8 PE=1 SV=2	Bromodomain-containing protein 8 OS=Mus musculus GN=Brd8 PE=1 SV=2	BRD8	0.485	0.406	0.502	1.94	2.191	1.827	0.687	0.579	0.703	0.664332	0.83964	0.837053	1.64123	1.26225	1.17974	0.720202	0.915631	0.969774	0.730057	0.483541	0.599723	1.18204	1.73578	1.54865	0.953899	0.632351	0.724911	1.93256	0.0278623	2.46314	0.0192298	0.784593	0.241668
F1RH94	93	S	Uncharacterized protein	Heterogeneous nuclear ribonucleoprotein A0 OS=Homo sapiens GN=HNRNPA0 PE=1 SV=1	Heterogeneous nuclear ribonucleoprotein A0 OS=Mus musculus GN=Hnrnpa0 PE=1 SV=1	HNRNPA0	0.521	0.539	0.487	2.143	2.021	1.973	0.481	0.596	0.583	0.87157	0.928915	0.915931	1.31843	1.3748	1.26208	0.906915	0.717469	0.833058	0.597772	0.580247	0.5317	1.62542	1.47003	1.56329	0.530369	0.830698	0.699831	2.26054	0.00302821	2.72486	0.000478815	0.829599	0.309086
F1RH94	73	S	Uncharacterized protein	Heterogeneous nuclear ribonucleoprotein A0 OS=Homo sapiens GN=HNRNPA0 PE=1 SV=1	Heterogeneous nuclear ribonucleoprotein A0 OS=Mus musculus GN=Hnrnpa0 PE=1 SV=1	HNRNPA0	0.68			1.775			0.648			0.87157	0.928915	0.915931	1.31843	1.3748	1.26208	0.906915	0.717469	0.833058	0.780201			1.3463			0.71451			1.88422		1.72558		1.09194
F1RH94	89	S	Uncharacterized protein	Heterogeneous nuclear ribonucleoprotein A0 OS=Homo sapiens GN=HNRNPA0 PE=1 SV=1	Heterogeneous nuclear ribonucleoprotein A0 OS=Mus musculus GN=Hnrnpa0 PE=1 SV=1	HNRNPA0	0.527	0.43	0.525	2.146	2.224	1.956	0.472	0.529	0.563	0.87157	0.928915	0.915931	1.31843	1.3748	1.26208	0.906915	0.717469	0.833058	0.604656	0.462905	0.573188	1.62769	1.61769	1.54982	0.520446	0.737314	0.675823	2.47996	0.00178148	2.92257	0.000157349	0.848554	0.285813
F1RH94	9	S	Uncharacterized protein	Heterogeneous nuclear ribonucleoprotein A0 OS=Homo sapiens GN=HNRNPA0 PE=1 SV=1	Heterogeneous nuclear ribonucleoprotein A0 OS=Mus musculus GN=Hnrnpa0 PE=1 SV=1	HNRNPA0			0.836			1.28			0.903	0.87157	0.928915	0.915931	1.31843	1.3748	1.26208	0.906915	0.717469	0.833058			0.912733			1.0142			1.08396	0.935643		1.11117		0.842037
F1RHA0	303	S	Uncharacterized protein	2-oxoisovalerate dehydrogenase subunit alpha, mitochondrial OS=Homo sapiens GN=BCKDHA PE=1 SV=2	2-oxoisovalerate dehydrogenase subunit alpha, mitochondrial OS=Mus musculus GN=Bckdha PE=1 SV=1	---	0.542	0.51	0.5	1.957	2.017	1.959	0.62	0.626	0.584	0.770899	0.874304	0.845641	1.24128	1.26422	1.18824	1.01318	0.896223	0.953481	0.703075	0.583321	0.591267	1.5766	1.59545	1.64866	0.611932	0.698487	0.612492	2.50699	2.18243e-05	2.5674	0.000149736	0.976469	0.771132
F1RHA0	313	S	Uncharacterized protein	2-oxoisovalerate dehydrogenase subunit alpha, mitochondrial OS=Homo sapiens GN=BCKDHA PE=1 SV=2	2-oxoisovalerate dehydrogenase subunit alpha, mitochondrial OS=Mus musculus GN=Bckdha PE=1 SV=1	---	0.62	0.449	0.419	1.757	2.194	1.982	0.719	0.535	0.636	0.770899	0.874304	0.845641	1.24128	1.26422	1.18824	1.01318	0.896223	0.953481	0.804256	0.513551	0.495482	1.41548	1.73545	1.66802	0.709644	0.59695	0.66703	2.44168	0.00582045	2.65757	0.00200275	0.918761	0.654235
F1RHE6	197	T	Uncharacterized protein	BTB/POZ domain-containing protein KCTD12 OS=Homo sapiens GN=KCTD12 PE=1 SV=1	BTB/POZ domain-containing protein KCTD12 OS=Mus musculus GN=Kctd12 PE=1 SV=1	KCTD12	0.67			1.635			0.778			1.18097	1.11252		0.713081	0.603013		1.09705	1.24701		0.56733			2.29287			0.709172			3.23316		4.04151		0.799989
F1RHE6	186	S	Uncharacterized protein	BTB/POZ domain-containing protein KCTD12 OS=Homo sapiens GN=KCTD12 PE=1 SV=1	BTB/POZ domain-containing protein KCTD12 OS=Mus musculus GN=Kctd12 PE=1 SV=1	KCTD12	0.828		0.913	1.379		1.387	0.851		0.736	1.18097	1.11252		0.713081	0.603013		1.09705	1.24701		0.701118			1.93386			0.775714			2.49301		2.75826		0.903836
F1RHF2	512	S	Uncharacterized protein	TBC1 domain family member 4 OS=Homo sapiens GN=TBC1D4 PE=1 SV=2	TBC1 domain family member 4 OS=Mus musculus GN=Tbc1d4 PE=1 SV=2	TBC1D4	0.578	0.372	0.456	1.818	2.437	2.019	0.705	0.407	0.567	1.08544	1.0313	1.06238	0.861731	0.941498	0.898217	1.02361	1.04876	1.04441	0.532501	0.36071	0.429225	2.10971	2.58843	2.24779	0.688739	0.388078	0.54289	4.28838	0.00113097	5.25237	0.00266563	0.816466	0.391351
F1RHF2	494	S	Uncharacterized protein	TBC1 domain family member 4 OS=Homo sapiens GN=TBC1D4 PE=1 SV=2	TBC1 domain family member 4 OS=Mus musculus GN=Tbc1d4 PE=1 SV=2	TBC1D4	0.467			1.983			0.668			1.08544	1.0313	1.06238	0.861731	0.941498	0.898217	1.02361	1.04876	1.04441	0.430239			2.30118			0.652592			3.52622		5.34862		0.659276
F1RHF2	487	S	Uncharacterized protein	TBC1 domain family member 4 OS=Homo sapiens GN=TBC1D4 PE=1 SV=2	TBC1 domain family member 4 OS=Mus musculus GN=Tbc1d4 PE=1 SV=2	TBC1D4	0.57	0.649		1.601	1.634		0.898	0.813		1.08544	1.0313	1.06238	0.861731	0.941498	0.898217	1.02361	1.04876	1.04441	0.525131	0.629304		1.85789	1.73553		0.877287	0.775203		2.17455	0.00749499	3.11271	0.00478224	0.698603	0.0761417
F1RHF2	430	S	Uncharacterized protein	TBC1 domain family member 4 OS=Homo sapiens GN=TBC1D4 PE=1 SV=2	TBC1 domain family member 4 OS=Mus musculus GN=Tbc1d4 PE=1 SV=2	TBC1D4	0.676			1.644			0.764			1.08544	1.0313	1.06238	0.861731	0.941498	0.898217	1.02361	1.04876	1.04441	0.622786			1.90779			0.746378			2.55606		3.06331		0.834412
F1RHJ2	165	S	Uncharacterized protein	Hepatoma-derived growth factor OS=Homo sapiens GN=HDGF PE=1 SV=1	Hepatoma-derived growth factor OS=Mus musculus GN=Hdgf PE=1 SV=2	HDGF	0.522	0.527	0.412	1.959	1.979	2.159	0.638	0.643	0.479	0.713627	0.757304	0.69765	1.49367	1.40631	1.60237	0.829623	0.848699	0.686785	0.731474	0.69589	0.590554	1.31154	1.40723	1.34738	0.769024	0.75763	0.697453	1.82822	9.42716e-05	2.01502	0.000409471	0.907294	0.245207
F1RHK9	1422	S	Uncharacterized protein	Rho guanine nucleotide exchange factor 11 OS=Homo sapiens GN=ARHGEF11 PE=1 SV=1	Rho guanine nucleotide exchange factor 12 OS=Mus musculus GN=Arhgef12 PE=1 SV=2	ARHGEF11	0.72	0.777	0.751	1.638	1.41	1.509	0.728	0.88	0.771	0.778986	0.887149	0.943616	1.34618	1.1143	1.04847	0.88315	0.97839	0.95491	0.924279	0.87584	0.795875	1.21677	1.26536	1.43924	0.824322	0.899437	0.807406	1.54924	0.0110718	1.51055	0.00948395	1.02561	0.67073
F1RHK9	1377	S	Uncharacterized protein	Rho guanine nucleotide exchange factor 11 OS=Homo sapiens GN=ARHGEF11 PE=1 SV=1	Rho guanine nucleotide exchange factor 12 OS=Mus musculus GN=Arhgef12 PE=1 SV=2	ARHGEF11	0.733	0.674	0.734	1.57	1.627	1.39	0.774	0.795	0.896	0.778986	0.887149	0.943616	1.34618	1.1143	1.04847	0.88315	0.97839	0.95491	0.940967	0.759738	0.777859	1.16626	1.4601	1.32574	0.876408	0.81256	0.938308	1.50426	0.0218861	1.59452	0.0119413	0.943396	0.514011
F1RHK9	1346	S	Uncharacterized protein	Rho guanine nucleotide exchange factor 11 OS=Homo sapiens GN=ARHGEF11 PE=1 SV=1	Rho guanine nucleotide exchange factor 12 OS=Mus musculus GN=Arhgef12 PE=1 SV=2	ARHGEF11	0.56	0.604	0.607	1.934	1.883	1.754	0.623	0.649	0.675	0.778986	0.887149	0.943616	1.34618	1.1143	1.04847	0.88315	0.97839	0.95491	0.718883	0.680833	0.64327	1.43665	1.68984	1.67292	0.70543	0.663335	0.706873	2.31226	0.0066737	2.34921	0.00516031	0.984269	0.701133
F1RHK9	1426	T	Uncharacterized protein	Rho guanine nucleotide exchange factor 11 OS=Homo sapiens GN=ARHGEF11 PE=1 SV=1	Rho guanine nucleotide exchange factor 12 OS=Mus musculus GN=Arhgef12 PE=1 SV=2	ARHGEF11	0.698		0.705	1.673		1.601	0.718		0.727	0.778986	0.887149	0.943616	1.34618	1.1143	1.04847	0.88315	0.97839	0.95491	0.896037		0.747126	1.24277		1.52699	0.812999		0.761328	1.75933	0.13901	1.68563	0.10676	1.04372	0.726279
F1RHL1	159	S	Uncharacterized protein	ETS translocation variant 3 OS=Homo sapiens GN=ETV3 PE=1 SV=2	ETS translocation variant 3 OS=Mus musculus GN=Etv3 PE=1 SV=2	ETV3	0.756	0.719		1.473	1.396		0.837	0.945
F1RHL7	1498	S	Uncharacterized protein	HEAT repeat-containing protein 1 OS=Homo sapiens GN=HEATR1 PE=1 SV=3		HEATR1	1.004			0.984			1.024			1.12847	0.992273	1.02459	0.890846	0.994111	0.994913	0.982411	1.03805	0.981797	0.889703			1.10457			1.04233			1.05971		1.2415		0.853569
F1RHM8	60	S	Uncharacterized protein	Ran-specific GTPase-activating protein OS=Homo sapiens GN=RANBP1 PE=1 SV=1	Ran-specific GTPase-activating protein OS=Mus musculus GN=Ranbp1 PE=1 SV=2	RANBP1	0.877	0.783	0.844	1.204	1.395	1.187	0.953	0.885	0.982	1.12813	1.10917	1.06509	0.79597	0.759394	0.961291	1.0464	1.12673	0.998052	0.777393	0.705936	0.792423	1.51262	1.83699	1.2348	0.910739	0.785455	0.983916	1.71053	0.0556759	2.01446	0.0446645	0.849126	0.131072
F1RHM9	26	S	Uncharacterized protein	tRNA (uracil-5-)-methyltransferase homolog A OS=Homo sapiens GN=TRMT2A PE=1 SV=2	tRNA (uracil-5-)-methyltransferase homolog A OS=Mus musculus GN=Trmt2a PE=1 SV=1	TRMT2A	0.725	0.713		1.559	1.588		0.792	0.792		1.12552	1.12151	1.02996	0.752948	0.812117	0.90454	1.14614	1.04863	1.04453	0.644146	0.63575		2.07053	1.95538		0.691013	0.755271		2.78362	0.00734317	3.1455	0.0259169	0.884955	0.229758
F1RHN0	109	S	Uncharacterized protein	Microprocessor complex subunit DGCR8 OS=Homo sapiens GN=DGCR8 PE=1 SV=1	Microprocessor complex subunit DGCR8 OS=Mus musculus GN=Dgcr8 PE=1 SV=2	DGCR8	0.915			1.157			0.961			0.998964	1.10909	0.976165	0.998451	0.947019	0.975636	1.00236	0.938915	1.00503	0.915949			1.15879			0.958733			1.20867		1.26513		0.955374
F1RHN0	95	S	Uncharacterized protein	Microprocessor complex subunit DGCR8 OS=Homo sapiens GN=DGCR8 PE=1 SV=1	Microprocessor complex subunit DGCR8 OS=Mus musculus GN=Dgcr8 PE=1 SV=2	DGCR8	0.844			1.432			0.79			0.998964	1.10909	0.976165	0.998451	0.947019	0.975636	1.00236	0.938915	1.00503	0.844875			1.43422			0.788137			1.81976		1.69755		1.07199
F1RHN0	275	S	Uncharacterized protein	Microprocessor complex subunit DGCR8 OS=Homo sapiens GN=DGCR8 PE=1 SV=1	Microprocessor complex subunit DGCR8 OS=Mus musculus GN=Dgcr8 PE=1 SV=2	DGCR8	0.512	0.571	0.53	2.08	1.931	1.961	0.544	0.64	0.554	0.998964	1.10909	0.976165	0.998451	0.947019	0.975636	1.00236	0.938915	1.00503	0.512531	0.514838	0.542941	2.08323	2.03903	2.00997	0.542717	0.681638	0.551229	3.45364	0.000126623	3.90511	1.52072e-05	0.884391	0.264958
F1RHN0	377	S	Uncharacterized protein	Microprocessor complex subunit DGCR8 OS=Homo sapiens GN=DGCR8 PE=1 SV=1	Microprocessor complex subunit DGCR8 OS=Mus musculus GN=Dgcr8 PE=1 SV=2	DGCR8	0.495	0.523	0.456	2.085	1.961	2.093	0.555	0.659	0.499	0.998964	1.10909	0.976165	0.998451	0.947019	0.975636	1.00236	0.938915	1.00503	0.495513	0.471559	0.467134	2.08823	2.07071	2.14527	0.553691	0.701874	0.496504	3.59815	0.000509185	4.39561	2.77428e-05	0.818579	0.223716
F1RHN2	640	T	Uncharacterized protein	Armadillo repeat protein deleted in velo-cardio-facial syndrome OS=Homo sapiens GN=ARVCF PE=1 SV=1	Armadillo repeat protein deleted in velo-cardio-facial syndrome homolog OS=Mus musculus GN=Arvcf PE=1 SV=2	ARVCF	0.368	0.529	0.493	2.384	1.95	1.996	0.416	0.663	0.556	1.097	1.15164	1.12689	0.710979	0.66658	0.71772	1.1852	1.15511	1.21514	0.33546	0.459345	0.437487	3.35312	2.92538	2.78103	0.350995	0.57397	0.45756	6.55289	0.00177895	7.35178	0.00303377	0.891334	0.547951
F1RHN2	201	S	Uncharacterized protein	Armadillo repeat protein deleted in velo-cardio-facial syndrome OS=Homo sapiens GN=ARVCF PE=1 SV=1	Armadillo repeat protein deleted in velo-cardio-facial syndrome homolog OS=Mus musculus GN=Arvcf PE=1 SV=2	ARVCF	0.63			1.72			0.741			1.097	1.15164	1.12689	0.710979	0.66658	0.71772	1.1852	1.15511	1.21514	0.574292			2.4192			0.62521			3.86942		4.21249		0.918559
F1RHN2	862	S	Uncharacterized protein	Armadillo repeat protein deleted in velo-cardio-facial syndrome OS=Homo sapiens GN=ARVCF PE=1 SV=1	Armadillo repeat protein deleted in velo-cardio-facial syndrome homolog OS=Mus musculus GN=Arvcf PE=1 SV=2	ARVCF	0.707	0.624		1.596	1.692		0.777	0.788		1.097	1.15164	1.12689	0.710979	0.66658	0.71772	1.1852	1.15511	1.21514	0.644484	0.541836		2.24479	2.53833		0.655585	0.682184		3.57545	0.0523452	4.0319	0.0324256	0.88679	0.368137
F1RHN2	341	S	Uncharacterized protein	Armadillo repeat protein deleted in velo-cardio-facial syndrome OS=Homo sapiens GN=ARVCF PE=1 SV=1	Armadillo repeat protein deleted in velo-cardio-facial syndrome homolog OS=Mus musculus GN=Arvcf PE=1 SV=2	ARVCF	0.77	0.706	0.638	1.675	1.615	1.731	0.651	0.776	0.668	1.097	1.15164	1.12689	0.710979	0.66658	0.71772	1.1852	1.15511	1.21514	0.701913	0.613038	0.56616	2.35591	2.42282	2.4118	0.549274	0.671795	0.54973	4.06061	3.89645e-05	3.82249	3.49882e-05	1.0623	0.553872
F1RHR8	1261	S	Uncharacterized protein	Serine/threonine-protein kinase mTOR OS=Homo sapiens GN=MTOR PE=1 SV=1	Serine/threonine-protein kinase mTOR OS=Mus musculus GN=Mtor PE=1 SV=2	MTOR	0.688	0.662		1.688	1.817		0.715	0.65		1.05829	1.07048	1.0572	0.837368	0.829239	0.806067	1.06887	0.981934	1.15215	0.650108	0.618416		2.01584	2.19117		0.668934	0.661959		3.16104	0.0384719	3.31646	0.0325538	0.953138	0.288103
F1RHR9	5	S	Uncharacterized protein	Exosome component 10 OS=Homo sapiens GN=EXOSC10 PE=1 SV=2	Exosome component 10 OS=Mus musculus GN=Exosc10 PE=1 SV=2	EXOSC10	0.309	0.427	0.407	2.503	2.116	2.199	0.37	0.621	0.446	1.11897	1.11956	1.14391	0.824603	0.843427	0.772783	1.05081	1.02298	1.05638	0.276146	0.3814	0.355797	3.0354	2.50881	2.84556	0.352111	0.607048	0.422195	6.07359	0.00098485	8.2793	0.00285907	0.733587	0.243771
F1RHU0	53	S	Uncharacterized protein	Prostate tumor-overexpressed gene 1 protein OS=Homo sapiens GN=PTOV1 PE=1 SV=1	Prostate tumor-overexpressed gene 1 protein homolog OS=Mus musculus GN=Ptov1 PE=1 SV=1	PTOV1		0.712			1.442			0.914			1.03511			1.09281			0.885991			0.687849			1.31953			1.03161		1.27909		1.91834		0.666771
F1RHU0	36	S	Uncharacterized protein	Prostate tumor-overexpressed gene 1 protein OS=Homo sapiens GN=PTOV1 PE=1 SV=1	Prostate tumor-overexpressed gene 1 protein homolog OS=Mus musculus GN=Ptov1 PE=1 SV=1	PTOV1	1.006	0.801	0.966	1.034	1.232	0.925	0.981	1.004	1.113		1.03511			1.09281			0.885991			0.77383			1.12736			1.13319		0.994856		1.45686		0.682875
F1RHU0	73	S	Uncharacterized protein	Prostate tumor-overexpressed gene 1 protein OS=Homo sapiens GN=PTOV1 PE=1 SV=1	Prostate tumor-overexpressed gene 1 protein homolog OS=Mus musculus GN=Ptov1 PE=1 SV=1	PTOV1	0.628		0.687	1.788		1.64	0.686		0.707		1.03511			1.09281			0.885991
F1RHU1	118	T	Uncharacterized protein	Bifunctional polynucleotide phosphatase/kinase OS=Homo sapiens GN=PNKP PE=1 SV=1	Bifunctional polynucleotide phosphatase/kinase OS=Mus musculus GN=Pnkp PE=1 SV=2	PNKP	0.805	0.776	0.797	1.417	1.511	1.507	0.838	0.797	0.729	1.14231	1.14126	1.11179	0.775924	0.841192	0.837014	1.0537	1.02877	1.1021	0.704712	0.679953	0.71686	1.82621	1.79626	1.80045	0.795295	0.774712	0.661465	2.4302	0.000960643	2.58047	2.22499e-07	0.941766	0.408801
F1RHU2	92	S	Uncharacterized protein	Proline-rich AKT1 substrate 1 OS=Homo sapiens GN=AKT1S1 PE=1 SV=1	Proline-rich AKT1 substrate 1 OS=Mus musculus GN=Akt1s1 PE=1 SV=1	AKT1S1	0.801	0.792	0.789	1.417	1.35	1.357	0.842	0.915	0.877	0.987024	1.01735	1.04769	0.948093	0.892135	1.01941	1.05936	1.07922	0.970752	0.81153	0.77849	0.753086	1.49458	1.51322	1.33117	0.794821	0.847833	0.903424	1.70418	0.00252737	1.8518	0.00452949	0.920281	0.151573
F1RHU2	88	S	Uncharacterized protein	Proline-rich AKT1 substrate 1 OS=Homo sapiens GN=AKT1S1 PE=1 SV=1	Proline-rich AKT1 substrate 1 OS=Mus musculus GN=Akt1s1 PE=1 SV=1	AKT1S1	0.742		0.83	1.559		1.291	0.775		0.899	0.987024	1.01735	1.04769	0.948093	0.892135	1.01941	1.05936	1.07922	0.970752	0.751755		0.792219	1.64435		1.26642	0.731575		0.926087	1.75595	0.137208	1.88525	0.168246	0.931417	0.662879
F1RHU2	183	S	Uncharacterized protein	Proline-rich AKT1 substrate 1 OS=Homo sapiens GN=AKT1S1 PE=1 SV=1	Proline-rich AKT1 substrate 1 OS=Mus musculus GN=Akt1s1 PE=1 SV=1	AKT1S1	0.79	0.687	0.903	1.323	1.499	1.245	0.932	0.89	0.875	0.987024	1.01735	1.04769	0.948093	0.892135	1.01941	1.05936	1.07922	0.970752	0.800386	0.675281	0.861897	1.39543	1.68024	1.2213	0.879778	0.824669	0.901363	1.649	0.0483644	1.83823	0.0262092	0.897058	0.240387
F1RHU3	112	S	Uncharacterized protein	TBC1 domain family member 17 OS=Homo sapiens GN=TBC1D17 PE=1 SV=2	TBC1 domain family member 17 OS=Mus musculus GN=Tbc1d17 PE=1 SV=2	TBC1D17	0.923		0.747	1.337		1.387	0.799		0.886	1.16297	1.12109	1.10066	0.75415	0.782077	0.736965	1.08803	1.08125	1.16997	0.793655		0.678687	1.77286		1.88204	0.734358		0.757286	2.45025	0.0257628	2.48237	0.00529115	0.98706	0.894573
F1RHU3	604	S	Uncharacterized protein	TBC1 domain family member 17 OS=Homo sapiens GN=TBC1D17 PE=1 SV=2	TBC1 domain family member 17 OS=Mus musculus GN=Tbc1d17 PE=1 SV=2	TBC1D17	0.803		0.847	1.415		1.316	0.842		0.862	1.16297	1.12109	1.10066	0.75415	0.782077	0.736965	1.08803	1.08125	1.16997	0.690471		0.769542	1.87629		1.7857	0.773879		0.736773	2.42411	0.0116107	2.50819	0.00321957	0.966479	0.640512
F1RHW0	138	S	Nitric oxide synthase-interacting protein			NOSIP	0.753	0.552	0.603	1.552	1.934	1.827	0.772	0.656	0.612	0.877832	0.995231	0.924416	1.1871	1.08244	1.12761	0.940512	0.965854	0.854243	0.857795	0.554645	0.652304	1.30739	1.7867	1.62024	0.820829	0.679191	0.716424	2.12698	0.0200931	2.28325	0.00952696	0.931557	0.645976
F1RHW0	168	T	Nitric oxide synthase-interacting protein			NOSIP	0.484		0.649	2.082		1.938	0.568		0.466	0.877832	0.995231	0.924416	1.1871	1.08244	1.12761	0.940512	0.965854	0.854243	0.551358		0.702065	1.75386		1.71868	0.603926		0.545512	3.02107	0.00247123	2.77044	0.0340116	1.09047	0.615027
F1RHW5	728	S	Uncharacterized protein	Splicing factor, arginine/serine-rich 19 OS=Homo sapiens GN=SCAF1 PE=1 SV=3	Splicing factor, arginine/serine-rich 19 OS=Mus musculus GN=Scaf1 PE=1 SV=1	SCAF1	0.391	0.391	0.408	2.358	2.255	2.132	0.418	0.54	0.506	0.979034	1.16552	1.02698	0.979858	0.744725	0.98135	1.03118	1.07349	0.993943	0.399373	0.335474	0.39728	2.40647	3.02796	2.17252	0.40536	0.503031	0.509084	5.36655	0.0137696	6.71917	0.0132454	0.798692	0.0867314
F1RHW5	966	S	Uncharacterized protein	Splicing factor, arginine/serine-rich 19 OS=Homo sapiens GN=SCAF1 PE=1 SV=3	Splicing factor, arginine/serine-rich 19 OS=Mus musculus GN=Scaf1 PE=1 SV=1	SCAF1	0.599	0.548	0.646	1.859	1.906	1.704	0.652	0.682	0.686	0.979034	1.16552	1.02698	0.979858	0.744725	0.98135	1.03118	1.07349	0.993943	0.611827	0.470178	0.629026	1.89721	2.55933	1.73638	0.632284	0.63531	0.690181	3.16325	0.0297899	3.61941	0.0236301	0.873968	0.23878
F1RHW5	240	S	Uncharacterized protein	Splicing factor, arginine/serine-rich 19 OS=Homo sapiens GN=SCAF1 PE=1 SV=3	Splicing factor, arginine/serine-rich 19 OS=Mus musculus GN=Scaf1 PE=1 SV=1	SCAF1	0.498	0.473	0.63	1.966	2.095	1.729	0.653	0.596	0.677	0.979034	1.16552	1.02698	0.979858	0.744725	0.98135	1.03118	1.07349	0.993943	0.508664	0.405829	0.613447	2.00641	2.81312	1.76186	0.633254	0.555197	0.681126	3.52026	0.0370102	4.30736	0.0301249	0.817265	0.194929
F1RHW5	990	T	Uncharacterized protein	Splicing factor, arginine/serine-rich 19 OS=Homo sapiens GN=SCAF1 PE=1 SV=3	Splicing factor, arginine/serine-rich 19 OS=Mus musculus GN=Scaf1 PE=1 SV=1	SCAF1	0.625		0.529	1.851		1.999	0.634		0.52	0.979034	1.16552	1.02698	0.979858	0.744725	0.98135	1.03118	1.07349	0.993943	0.638384		0.515101	1.88905		2.03699	0.614829		0.523169	3.44995	0.00797674	3.40363	0.0054436	1.01361	0.929565
F1RHW5	502	S	Uncharacterized protein	Splicing factor, arginine/serine-rich 19 OS=Homo sapiens GN=SCAF1 PE=1 SV=3	Splicing factor, arginine/serine-rich 19 OS=Mus musculus GN=Scaf1 PE=1 SV=1	SCAF1	0.709	0.659	0.545	1.534	1.666	1.868	0.827	0.777	0.626	0.979034	1.16552	1.02698	0.979858	0.744725	0.98135	1.03118	1.07349	0.993943	0.724183	0.565415	0.53068	1.56553	2.23707	1.9035	0.801993	0.723806	0.629815	2.64709	0.0203795	3.13474	0.0151661	0.844436	0.225422
F1RHW5	504	S	Uncharacterized protein	Splicing factor, arginine/serine-rich 19 OS=Homo sapiens GN=SCAF1 PE=1 SV=3	Splicing factor, arginine/serine-rich 19 OS=Mus musculus GN=Scaf1 PE=1 SV=1	SCAF1	0.689	0.721	0.664	1.523	1.497	1.626	0.855	0.86	0.741	0.979034	1.16552	1.02698	0.979858	0.744725	0.98135	1.03118	1.07349	0.993943	0.703755	0.61861	0.646553	1.55431	2.01014	1.6569	0.829146	0.801123	0.745516	2.19774	0.0180121	2.65189	0.0135943	0.828744	0.018097
F1RHX9	230	S	Uncharacterized protein	Bcl-2-like protein 12 OS=Homo sapiens GN=BCL2L12 PE=1 SV=1		BCL2L12	0.623	0.535	0.379	1.771	1.997	2.063	0.704	0.62	0.597	1.11638			1.03908			0.857833			0.558056			1.70439			0.820672			2.07682		3.05416		0.679998
F1RI15	76	S	Uncharacterized protein	Heat shock 70 kDa protein 4 OS=Homo sapiens GN=HSPA4 PE=1 SV=4	Heat shock 70 kDa protein 4 OS=Mus musculus GN=Hspa4 PE=1 SV=1	HSPA4	0.975	0.871	0.816	1.135	1.242	1.312	0.923	0.931	0.893	1.11307	1.06257	0.988829	0.892562	0.824847	1.07457	0.979289	1.01591	0.931743	0.875959	0.819707	0.825218	1.27162	1.50573	1.22095	0.94252	0.916424	0.958419	1.41917	0.0438668	1.58607	0.026314	0.894767	0.0137779
F1RI16	1030	S	Uncharacterized protein	AF4/FMR2 family member 4 OS=Homo sapiens GN=AFF4 PE=1 SV=1	AF4/FMR2 family member 4 OS=Mus musculus GN=Aff4 PE=1 SV=1	AFF4	0.747	0.703		1.68	1.696		0.669	0.712				0.945812			1.03642			1.0132
F1RI39	625	S	Uncharacterized protein	Alpha-actinin-4 OS=Homo sapiens GN=ACTN4 PE=1 SV=2	Alpha-actinin-4 OS=Mus musculus GN=Actn4 PE=1 SV=1	ACTN4	0.57		0.535	1.875		1.875	0.665		0.628	0.575356	0.481661	0.474645	1.89925	1.91809	1.99209	0.581711	0.668191	0.478183	0.99069		1.12716	0.987234		0.941224	1.14318		1.31331	0.785048	0.17891	0.910575	0.382536	0.862146	0.266333
F1RI41	217	S	Eukaryotic translation initiation factor 3 subunit K			EIF3K	0.849		0.901	1.148		1.098	1.027		1.013	1.07094	1.07082	0.952581	0.905404	0.873046	0.972668	1.03762	1.03387	1.02183	0.792758		0.945851	1.26794		1.12885	0.989763		0.991361	1.20982	0.205524	1.37857	0.0872019	0.877587	0.358457
F1RI50	330	S	Uncharacterized protein	Forkhead box protein K1 OS=Homo sapiens GN=FOXK1 PE=1 SV=1	Forkhead box protein K1 OS=Mus musculus GN=Foxk1 PE=1 SV=2	FOXK1	0.812	0.798	0.779	1.439	1.42	1.431	0.813	0.851	0.816	1.0946	1.08981	1.04673	0.859043	0.891401	0.935397	1.06995	1.0305	1.03448	0.74182	0.732237	0.744225	1.67512	1.593	1.52983	0.759845	0.825813	0.788802	2.02065	0.0006172	2.16291	0.00223612	0.934226	0.10741
F1RI50	326	S	Uncharacterized protein	Forkhead box protein K1 OS=Homo sapiens GN=FOXK1 PE=1 SV=1	Forkhead box protein K1 OS=Mus musculus GN=Foxk1 PE=1 SV=2	FOXK1	0.829			1.43			0.805			1.0946	1.08981	1.04673	0.859043	0.891401	0.935397	1.06995	1.0305	1.03448	0.757351			1.66464			0.752368			2.21254		2.19798		1.00662
F1RI50	129	S	Uncharacterized protein	Forkhead box protein K1 OS=Homo sapiens GN=FOXK1 PE=1 SV=1	Forkhead box protein K1 OS=Mus musculus GN=Foxk1 PE=1 SV=2	FOXK1	0.731	0.717	0.749	1.516	1.652	1.487	0.822	0.736	0.791	1.0946	1.08981	1.04673	0.859043	0.891401	0.935397	1.06995	1.0305	1.03448	0.667821	0.657912	0.715564	1.76475	1.85326	1.5897	0.768257	0.714217	0.764635	2.31752	0.00440974	2.55118	0.00375782	0.908411	0.0512336
F1RI50	305	S	Uncharacterized protein	Forkhead box protein K1 OS=Homo sapiens GN=FOXK1 PE=1 SV=1	Forkhead box protein K1 OS=Mus musculus GN=Foxk1 PE=1 SV=2	FOXK1	0.785	0.767	0.72	1.451	1.417	1.443	0.828	0.883	0.86	1.0946	1.08981	1.04673	0.859043	0.891401	0.935397	1.06995	1.0305	1.03448	0.717154	0.703792	0.687859	1.68909	1.58963	1.54266	0.773865	0.856866	0.831335	1.95827	0.000399156	2.28631	0.00164356	0.856518	0.030106
F1RI50	143	S	Uncharacterized protein	Forkhead box protein K1 OS=Homo sapiens GN=FOXK1 PE=1 SV=1	Forkhead box protein K1 OS=Mus musculus GN=Foxk1 PE=1 SV=2	FOXK1	0.738	0.811	0.797	1.474	1.426	1.361	0.853	0.835	0.864	1.0946	1.08981	1.04673	0.859043	0.891401	0.935397	1.06995	1.0305	1.03448	0.674216	0.744166	0.761422	1.71586	1.59973	1.455	0.79723	0.810287	0.835202	1.95298	0.0082359	2.18854	0.00373301	0.892368	0.0650187
F1RI50	313	S	Uncharacterized protein	Forkhead box protein K1 OS=Homo sapiens GN=FOXK1 PE=1 SV=1	Forkhead box protein K1 OS=Mus musculus GN=Foxk1 PE=1 SV=2	FOXK1	0.809	0.771	0.752	1.438	1.451	1.354	0.817	0.851	0.912	1.0946	1.08981	1.04673	0.859043	0.891401	0.935397	1.06995	1.0305	1.03448	0.73908	0.707462	0.718431	1.67396	1.62777	1.44751	0.763584	0.825813	0.881602	1.92199	0.0024873	2.19367	0.0056709	0.876153	0.0868749
F1RI50	125	S	Uncharacterized protein	Forkhead box protein K1 OS=Homo sapiens GN=FOXK1 PE=1 SV=1	Forkhead box protein K1 OS=Mus musculus GN=Foxk1 PE=1 SV=2	FOXK1	0.745		0.757	1.557		1.458	0.775		0.811	1.0946	1.08981	1.04673	0.859043	0.891401	0.935397	1.06995	1.0305	1.03448	0.680611		0.723207	1.81248		1.5587	0.72433		0.783969	2.23509	0.0729838	2.40144	0.0746749	0.93073	0.302073
F1RI50	321	T	Uncharacterized protein	Forkhead box protein K1 OS=Homo sapiens GN=FOXK1 PE=1 SV=1	Forkhead box protein K1 OS=Mus musculus GN=Foxk1 PE=1 SV=2	FOXK1	0.735	0.727	0.715	1.603	1.535	1.516	0.745	0.823	0.796	1.0946	1.08981	1.04673	0.859043	0.891401	0.935397	1.06995	1.0305	1.03448	0.671475	0.667088	0.683082	1.86603	1.72201	1.6207	0.696291	0.798642	0.769468	2.30027	0.00172705	2.57649	0.00431653	0.892795	0.11384
F1RI72	450	S	Uncharacterized protein	Golgin subfamily A member 3 OS=Homo sapiens GN=GOLGA3 PE=1 SV=2	Golgin subfamily A member 3 OS=Mus musculus GN=Golga3 PE=1 SV=3	GOLGA3										1.05589	1.02421	1.14647	0.828423	0.864093	0.856065	1.12458	1.09767	1.01731
F1RI78	439	Y	Protein tweety homolog			TTYH3	0.894			1.158			0.978
F1RI78	437	S	Protein tweety homolog			TTYH3	0.892	0.797	0.85	1.166	1.396	1.113	0.972	0.872	1.045
F1RI78	496	S	Protein tweety homolog			TTYH3	0.817	0.868		1.36	1.333		0.877	0.859
F1RIA1	36	S	Uncharacterized protein	RNMT-activating mini protein OS=Homo sapiens GN=FAM103A1 PE=1 SV=1	RNMT-activating mini protein OS=Mus musculus GN=Fam103a1 PE=3 SV=1	FAM103A1	0.715	0.692	0.658	1.543	1.459	1.655	0.813	0.918	0.72
F1RIC1	69	S	Uncharacterized protein	Coiled-coil domain-containing protein 86 OS=Homo sapiens GN=CCDC86 PE=1 SV=1	Coiled-coil domain-containing protein 86 OS=Mus musculus GN=Ccdc86 PE=1 SV=2	CCDC86	0.638	0.626	0.557	1.712	1.75	1.891	0.74	0.739	0.594	0.553829	0.660787	0.689696	1.70727	1.59432	1.46773	0.760815	0.786634	0.817578	1.15198	0.947354	0.807602	1.00277	1.09764	1.28838	0.972641	0.939446	0.726536	1.2843	0.0938369	1.16576	0.28796	1.10169	0.520218
F1RIC1	63	S	Uncharacterized protein	Coiled-coil domain-containing protein 86 OS=Homo sapiens GN=CCDC86 PE=1 SV=1	Coiled-coil domain-containing protein 86 OS=Mus musculus GN=Ccdc86 PE=1 SV=2	CCDC86	0.596	0.598	0.677	1.828	1.731	1.737	0.681	0.78	0.625	0.553829	0.660787	0.689696	1.70727	1.59432	1.46773	0.760815	0.786634	0.817578	1.07614	0.904981	0.981592	1.07071	1.08573	1.18346	0.895092	0.991567	0.764453	1.25981	0.0528897	1.12731	0.114924	1.11754	0.280587
F1RIC1	18	S	Uncharacterized protein	Coiled-coil domain-containing protein 86 OS=Homo sapiens GN=CCDC86 PE=1 SV=1	Coiled-coil domain-containing protein 86 OS=Mus musculus GN=Ccdc86 PE=1 SV=2	CCDC86	0.58	0.494	0.543	1.922	2.043	1.97	0.616	0.619	0.534	0.553829	0.660787	0.689696	1.70727	1.59432	1.46773	0.760815	0.786634	0.817578	1.04726	0.747593	0.787304	1.12577	1.28142	1.34221	0.809658	0.786897	0.653149	1.66662	0.00437773	1.45204	0.0325579	1.14777	0.372087
F1RIC1	91	S	Uncharacterized protein	Coiled-coil domain-containing protein 86 OS=Homo sapiens GN=CCDC86 PE=1 SV=1	Coiled-coil domain-containing protein 86 OS=Mus musculus GN=Ccdc86 PE=1 SV=2	CCDC86	0.638	0.487	0.63	1.83	2.066	1.686	0.64	0.607	0.716	0.553829	0.660787	0.689696	1.70727	1.59432	1.46773	0.760815	0.786634	0.817578	1.15198	0.736999	0.913446	1.07188	1.29585	1.14871	0.841203	0.771642	0.875758	1.41302	0.0204462	1.25479	0.17792	1.1261	0.479029
F1RIC1	58	S	Uncharacterized protein	Coiled-coil domain-containing protein 86 OS=Homo sapiens GN=CCDC86 PE=1 SV=1	Coiled-coil domain-containing protein 86 OS=Mus musculus GN=Ccdc86 PE=1 SV=2	CCDC86	0.673	0.586	0.65	1.754	1.91	1.761	0.673	0.645	0.629	0.553829	0.660787	0.689696	1.70727	1.59432	1.46773	0.760815	0.786634	0.817578	1.21518	0.886821	0.942445	1.02737	1.198	1.19981	0.884577	0.819949	0.769346	1.38454	0.0147008	1.12506	0.352013	1.23064	0.194213
F1RIC1	47	S	Uncharacterized protein	Coiled-coil domain-containing protein 86 OS=Homo sapiens GN=CCDC86 PE=1 SV=1	Coiled-coil domain-containing protein 86 OS=Mus musculus GN=Ccdc86 PE=1 SV=2	CCDC86	0.722	0.655	0.645	1.584	1.742	1.73	0.772	0.718	0.662	0.553829	0.660787	0.689696	1.70727	1.59432	1.46773	0.760815	0.786634	0.817578	1.30365	0.991242	0.935195	0.927795	1.09263	1.17869	1.0147	0.91275	0.809709	1.16877	0.18162	0.99041	0.943811	1.18009	0.292611
F1RIF9	1601	S	Uncharacterized protein	Kinesin-like protein KIF1B OS=Homo sapiens GN=KIF1B PE=1 SV=5	Kinesin-like protein KIF1B OS=Mus musculus GN=Kif1b PE=1 SV=2	KIF1B	0.676	0.678		1.703	1.711		0.714	0.723		1.29052	1.16734	1.1827	0.579736	0.619424	0.684579	1.1189	1.1391	1.14725	0.523821	0.580805		2.93754	2.76224		0.638127	0.634713		4.47801	0.0251425	5.15992	0.0137542	0.867843	0.206849
F1RIG2	18	S	Uncharacterized protein	Ubiquitin conjugation factor E4 B OS=Homo sapiens GN=UBE4B PE=1 SV=1	Ubiquitin conjugation factor E4 B OS=Mus musculus GN=Ube4b PE=1 SV=3	LOC100521136	0.881			1.361			0.816			1.06823	1.19425		0.890088	0.640189		1.03818	1.13935		0.824729			1.52906			0.78599			1.9454		1.85402		1.04929
F1RIH6	458	T	Uncharacterized protein	Transmembrane protein 201 OS=Homo sapiens GN=TMEM201 PE=1 SV=1	Transmembrane protein 201 OS=Mus musculus GN=Tmem201 PE=1 SV=1	TMEM201	0.507			1.997			0.619			0.833749		1.10778	1.38119		0.80427	0.803228		1.09648	0.608096			1.44585			0.770641			1.87617		2.37767		0.789079
F1RIH6	455	S	Uncharacterized protein	Transmembrane protein 201 OS=Homo sapiens GN=TMEM201 PE=1 SV=1	Transmembrane protein 201 OS=Mus musculus GN=Tmem201 PE=1 SV=1	TMEM201	0.581	0.744	0.623	1.974	1.783	1.7	0.57	0.602	0.71	0.833749		1.10778	1.38119		0.80427	0.803228		1.09648	0.696852		0.562388	1.4292		2.11372	0.709637		0.647527	2.61053	0.190709	2.81354	0.174288	0.927847	0.599994
F1RIH6	442	S	Uncharacterized protein	Transmembrane protein 201 OS=Homo sapiens GN=TMEM201 PE=1 SV=1	Transmembrane protein 201 OS=Mus musculus GN=Tmem201 PE=1 SV=1	TMEM201	0.745			1.382			0.924			0.833749		1.10778	1.38119		0.80427	0.803228		1.09648	0.893554			1.00058			1.15036			0.869803		1.11978		0.776761
F1RII7	45	S	Hemoglobin subunit beta			HBB	0.696			1.268			1.066			1.10263	0.98363	1.62204	0.257146	0.322848	0.471477	1.54567	1.5928	0.947931	0.631219			4.93104			0.689669			7.14987		7.81193		0.91525
F1RIP1	657	S	Glycogen [starch] synthase			GYS1	0.752	0.61	0.776	1.646	1.869	1.593	0.694	0.655	0.67	1.09549	0.93248	1.09286	0.783183	0.756015	0.742886	1.11107	1.277	1.17169	0.686451	0.654169	0.710066	2.10168	2.47217	2.14434	0.624622	0.51292	0.571822	3.93023	0.00292676	3.27607	0.00493497	1.19968	0.0524283
F1RIP1	653	S	Glycogen [starch] synthase			GYS1	0.77	0.655	0.664	1.63	1.863	1.804	0.69	0.619	0.576	1.09549	0.93248	1.09286	0.783183	0.756015	0.742886	1.11107	1.277	1.17169	0.702882	0.702428	0.607582	2.08125	2.46424	2.42837	0.621021	0.484729	0.491596	4.3659	0.00194436	3.46459	0.00347782	1.26015	0.0702997
F1RIP4	431	S	RuvB-like helicase			RUVBL2	0.871	0.925		1.121	0.935		1.03	1.135		1.11163	1.08057	1.09296	0.723427	0.757839	0.808616	1.13388	1.14582	1.09635	0.783537	0.856032		1.54957	1.23377		0.908387	0.990554		1.46573	0.200468	1.69761	0.156681	0.863412	0.143492
F1RIP6	317	S	Uncharacterized protein	Nucleobindin-1 OS=Homo sapiens GN=NUCB1 PE=1 SV=4	Nucleobindin-1 OS=Mus musculus GN=Nucb1 PE=1 SV=2	NUCB1	0.806			1.248			0.981			0.829637	0.823326	0.837591	1.18339	1.17436	1.18405	0.964393	1.02386	0.946518	0.971509			1.0546			1.01722			1.03674		1.08552		0.955063
F1RIP6	366	S	Uncharacterized protein	Nucleobindin-1 OS=Homo sapiens GN=NUCB1 PE=1 SV=4	Nucleobindin-1 OS=Mus musculus GN=Nucb1 PE=1 SV=2	NUCB1	0.768	0.748	0.951	1.251	1.522	1.15	1.014	0.815	0.919	0.829637	0.823326	0.837591	1.18339	1.17436	1.18405	0.964393	1.02386	0.946518	0.925706	0.908511	1.1354	1.05713	1.29602	0.971246	1.05144	0.796009	0.970927	1.17955	0.246209	1.11947	0.389433	1.05366	0.655935
F1RIR2	117	S	Uncharacterized protein	Syntaxin-4 OS=Homo sapiens GN=STX4 PE=1 SV=2	Syntaxin-4 OS=Mus musculus GN=Stx4 PE=1 SV=1	STX4	0.42		0.464	2.123		2.085	0.591		0.5	0.926835	0.832667	0.918921	1.11524	1.21425	1.11976	0.975721	0.964346	0.954778	0.453155		0.50494	1.90363		1.86201	0.605706		0.523682	3.33423	0.00515818	3.93034	0.000736273	0.848331	0.24205
F1RIR2	15	S	Uncharacterized protein	Syntaxin-4 OS=Homo sapiens GN=STX4 PE=1 SV=2	Syntaxin-4 OS=Mus musculus GN=Stx4 PE=1 SV=1	STX4	0.571	0.452	0.531	1.911	2.144	1.904	0.633	0.575	0.605	0.926835	0.832667	0.918921	1.11524	1.21425	1.11976	0.975721	0.964346	0.954778	0.616075	0.542834	0.577852	1.71354	1.7657	1.70037	0.648751	0.596259	0.633655	2.75706	3.03733e-06	2.98233	2.5492e-06	0.924465	0.152493
F1RIR2	14	S	Uncharacterized protein	Syntaxin-4 OS=Homo sapiens GN=STX4 PE=1 SV=2	Syntaxin-4 OS=Mus musculus GN=Stx4 PE=1 SV=1	STX4	0.572	0.495	0.552	1.889	2.038	1.86	0.652	0.623	0.627	0.926835	0.832667	0.918921	1.11524	1.21425	1.11976	0.975721	0.964346	0.954778	0.617154	0.594475	0.600705	1.69381	1.6784	1.66107	0.668224	0.646034	0.656697	2.55373	4.9733e-07	2.77724	3.06047e-07	0.919521	0.00480084
F1RIT6	360	S	Uncharacterized protein	ARF GTPase-activating protein GIT2 OS=Homo sapiens GN=GIT2 PE=1 SV=2	ARF GTPase-activating protein GIT2 OS=Mus musculus GN=Git2 PE=1 SV=2	GIT2	0.861	0.844		1.325	1.401		0.865	0.825				1.33018			0.689359			1.00793
F1RIV4	1327	S	Uncharacterized protein	Integrator complex subunit 1 OS=Homo sapiens GN=INTS1 PE=1 SV=2	Integrator complex subunit 1 OS=Mus musculus GN=Ints1 PE=1 SV=2	INTS1	0.904	0.873	0.961	1.276	1.221	1.156	0.868	0.948	0.905	1.09617	1.16897	1.13248	0.770995	0.826004	0.77288	1.10086	1.00134	1.0969	0.824693	0.74681	0.848578	1.655	1.4782	1.4957	0.788475	0.946733	0.82505	1.80799	0.000825517	1.91271	0.0012208	0.945249	0.464708
F1RIV4	83	T	Uncharacterized protein	Integrator complex subunit 1 OS=Homo sapiens GN=INTS1 PE=1 SV=2	Integrator complex subunit 1 OS=Mus musculus GN=Ints1 PE=1 SV=2	INTS1	0.634		0.68	1.666		1.639	0.785		0.716	1.09617	1.16897	1.13248	0.770995	0.826004	0.77288	1.10086	1.00134	1.0969	0.57838		0.600451	2.16084		2.12064	0.71308		0.652747	3.13472	0.00137019	3.63198	0.0011135	0.86309	0.166972
F1RIV4	1318	S	Uncharacterized protein	Integrator complex subunit 1 OS=Homo sapiens GN=INTS1 PE=1 SV=2	Integrator complex subunit 1 OS=Mus musculus GN=Ints1 PE=1 SV=2	INTS1	0.634	0.611	0.58	1.785	1.798	1.774	0.682	0.713	0.681	1.09617	1.16897	1.13248	0.770995	0.826004	0.77288	1.10086	1.00134	1.0969	0.57838	0.522681	0.512149	2.31519	2.17674	2.29531	0.619516	0.712047	0.620839	3.47636	1.77372e-05	4.20729	6.84409e-05	0.82627	0.044732
F1RIY0	1032	S	Uncharacterized protein	Serine/threonine-protein kinase Nek1 OS=Homo sapiens GN=NEK1 PE=1 SV=2	Serine/threonine-protein kinase Nek1 OS=Mus musculus GN=Nek1 PE=1 SV=2	NEK1	0.386	0.382	0.355	2.281	2.336	2.302	0.487	0.483	0.399	1.06728	1.08096		0.800455	0.915206		1.12106	1.00061		0.361668	0.35339		2.84963	2.55243		0.434409	0.482704		5.89029	0.0374127	7.55472	0.0401686	0.779683	0.140772
F1RIY7	319	S	Uncharacterized protein	SUN domain-containing protein 1 OS=Homo sapiens GN=SUN1 PE=1 SV=3	SUN domain-containing protein 1 OS=Mus musculus GN=Sun1 PE=1 SV=2	LOC100737805	0.401	0.585	0.57	2.073	1.663	1.798	0.651	0.848	0.668	0.805383	0.740682	0.857267	1.31069	1.37079	1.17878	0.89367	0.838942	0.925866	0.4979	0.789812	0.664904	1.58161	1.21317	1.5253	0.728457	1.0108	0.721487	1.7556	0.0151526	2.21246	0.00660311	0.793508	0.255384
F1RJ12	78	S	Protein phosphatase 1 regulatory subunit			PPP1R3D	1.021			1.076			0.932
F1RJ22	268	S	Uncharacterized protein	PIN2/TERF1-interacting telomerase inhibitor 1 OS=Homo sapiens GN=PINX1 PE=1 SV=2	PIN2/TERF1-interacting telomerase inhibitor 1 OS=Mus musculus GN=Pinx1 PE=1 SV=2	PINX1	0.358	0.573	0.473	2.468	1.987	2.136	0.354	0.593	0.444
F1RJ29	83	T	Uncharacterized protein	Serine/threonine-protein kinase NLK OS=Homo sapiens GN=NLK PE=1 SV=2	Serine/threonine-protein kinase NLK OS=Mus musculus GN=Nlk PE=1 SV=2	---	0.685	0.814		1.473	1.319		0.901	0.92
F1RJ33	286	S	Galectin			LGALS9	0.684			1.656			0.748			1.34987	0.979607	1.43023	0.539082	0.917017	0.70425	1.10183	1.09186	0.901821	0.506716			3.07189			0.678871			4.525		6.06235		0.74641
F1RJ53	194	T	Uncharacterized protein	Kinase suppressor of Ras 1 OS=Homo sapiens GN=KSR1 PE=1 SV=3	Kinase suppressor of Ras 1 OS=Mus musculus GN=Ksr1 PE=1 SV=1	KSR1	0.81			1.557			0.715
F1RJ56	277	S	Ecotropic viral integration site 2B			EVI2B
F1RJ83	314	S	Uncharacterized protein	ETS-related transcription factor Elf-1 OS=Homo sapiens GN=ELF1 PE=1 SV=2	ETS-related transcription factor Elf-1 OS=Mus musculus GN=Elf1 PE=1 SV=1	ELF1	1.111			1.07			0.853
F1RJ83	168	S	Uncharacterized protein	ETS-related transcription factor Elf-1 OS=Homo sapiens GN=ELF1 PE=1 SV=2	ETS-related transcription factor Elf-1 OS=Mus musculus GN=Elf1 PE=1 SV=1	ELF1	0.864	0.831		1.369	1.393		0.825	0.844
F1RJ91	264	S	Uncharacterized protein	Protein turtle homolog A OS=Homo sapiens GN=IGSF9 PE=1 SV=2	Protein turtle homolog A OS=Mus musculus GN=Igsf9 PE=1 SV=2	LOC100625319	0.788			1.441			0.834
F1RJ93	172	S	Transgelin			TAGLN2	0.755	0.611	0.71	1.557	1.758	1.607	0.766	0.746	0.716	1.10668	1.11099	1.12844	0.710107	0.67497	0.758344	1.16943	1.1867	1.10709	0.682221	0.549959	0.629186	2.19263	2.60456	2.11909	0.655017	0.628636	0.646741	3.58283	0.0080312	3.7157	0.0054488	0.964242	0.61276
F1RJ94	1009	S	Diacylglycerol kinase			DGKH	0.908	0.906	0.922	0.941	1.079	0.829	1.15	1.033	1.242	0.894468		1.1599	1.24116		0.826821	0.875833		1.02648	1.01513		0.794899	0.75816		1.00264	1.31304		1.20996	0.697898	0.158882	0.9728	0.894919	0.717412	0.146401
F1RJA5	314	S	Uncharacterized protein	Centrosomal protein of 104 kDa OS=Homo sapiens GN=CEP104 PE=1 SV=1	Centrosomal protein of 104 kDa OS=Mus musculus GN=Cep104 PE=1 SV=1	---	0.761	0.765	0.635	1.502	1.5	1.681	0.807	0.816	0.716
F1RJA7	281	S	Uncharacterized protein	WD repeat-containing protein WRAP73 OS=Homo sapiens GN=WRAP73 PE=1 SV=1	WD repeat-containing protein WRAP73 OS=Mus musculus GN=Wrap73 PE=1 SV=2	WRAP73	0.879	0.861		1.209	1.196		0.948	0.977
F1RJC5	578	S	Uncharacterized protein	Cyclin-dependent kinase 11B OS=Homo sapiens GN=CDK11B PE=1 SV=3	Cyclin-dependent kinase 11B OS=Mus musculus GN=Cdk11b PE=1 SV=2	CDK11B	1.106	0.951	0.943	0.681	1.062	0.992	1.189	1.005	1.072	1.03902	1.04708	1.03872	0.929811	0.938816	0.935241	1.01081	1.02723	0.998423	1.06447	0.908236	0.907851	0.732407	1.13121	1.06069	1.17629	0.978363	1.07369	0.905823	0.511876	1.01519	0.920606	0.892269	0.208933
F1RJC5	276	S	Uncharacterized protein	Cyclin-dependent kinase 11B OS=Homo sapiens GN=CDK11B PE=1 SV=3	Cyclin-dependent kinase 11B OS=Mus musculus GN=Cdk11b PE=1 SV=2	CDK11B	0.503	0.54	0.554	2.072	2.004	1.91	0.557	0.608	0.579	1.03902	1.04708	1.03872	0.929811	0.938816	0.935241	1.01081	1.02723	0.998423	0.484111	0.515718	0.53335	2.22841	2.1346	2.04225	0.551045	0.591885	0.579914	3.71784	0.000724503	4.17777	0.000544737	0.889911	0.0296208
F1RJC5	423	S	Uncharacterized protein	Cyclin-dependent kinase 11B OS=Homo sapiens GN=CDK11B PE=1 SV=3	Cyclin-dependent kinase 11B OS=Mus musculus GN=Cdk11b PE=1 SV=2	CDK11B	0.838			1.393			0.829			1.03902	1.04708	1.03872	0.929811	0.938816	0.935241	1.01081	1.02723	0.998423	0.806531			1.49815			0.820138			1.82671		1.85753		0.983409
F1RJG8	259	S	Uncharacterized protein			C12orf43	0.498			2.101			0.539			0.946697	0.842142	0.51564	0.988537	1.34372	1.77224	1.05923	0.841497	0.673307	0.52604			2.12536			0.508862			4.1767		4.04031		1.03376
F1RJG8	117	T	Uncharacterized protein			C12orf43	0.735	0.707	0.713	1.508	1.519	1.594	0.826	0.856	0.727	0.946697	0.842142	0.51564	0.988537	1.34372	1.77224	1.05923	0.841497	0.673307	0.776384	0.839526	1.38275	1.52549	1.13044	0.899429	0.779815	1.01723	1.07975	1.23587	0.350585	1.18565	0.523087	1.04236	0.861521
F1RJI2	391	S	Uncharacterized protein	Rab5 GDP/GTP exchange factor OS=Homo sapiens GN=RABGEF1 PE=1 SV=2	Rab5 GDP/GTP exchange factor OS=Mus musculus GN=Rabgef1 PE=1 SV=1	RABGEF1	0.894		0.845	1.297		1.294	0.86		0.884	1.30262	1.23913	1.14204	0.616348	0.636567	0.632444	1.12643	1.09435	1.22135	0.686308		0.739907	2.10433		2.04603	0.763475		0.723792	2.7906	0.00143316	2.91006	0.000878763	0.95895	0.463564
F1RJI2	401	S	Uncharacterized protein	Rab5 GDP/GTP exchange factor OS=Homo sapiens GN=RABGEF1 PE=1 SV=2	Rab5 GDP/GTP exchange factor OS=Mus musculus GN=Rabgef1 PE=1 SV=1	RABGEF1	1.055	0.897	0.945	0.946	1.094	1.078	1.01	1.029	0.991	1.30262	1.23913	1.14204	0.616348	0.636567	0.632444	1.12643	1.09435	1.22135	0.809905	0.723894	0.82747	1.53485	1.71859	1.7045	0.896639	0.940284	0.8114	1.87211	0.000890897	2.09969	0.000880458	0.891609	0.12769
F1RJI2	133	S	Uncharacterized protein	Rab5 GDP/GTP exchange factor OS=Homo sapiens GN=RABGEF1 PE=1 SV=2	Rab5 GDP/GTP exchange factor OS=Mus musculus GN=Rabgef1 PE=1 SV=1	RABGEF1	0.828	0.687	0.731	1.385	1.568	1.503	0.845	0.833	0.793	1.30262	1.23913	1.14204	0.616348	0.636567	0.632444	1.12643	1.09435	1.22135	0.635641	0.554421	0.640085	2.24711	2.46321	2.3765	0.750158	0.761183	0.649284	3.27998	0.000129116	3.87227	0.000234201	0.847045	0.0751161
F1RJJ0	123	S	Uncharacterized protein	Serine/arginine-rich splicing factor 9 OS=Homo sapiens GN=SRSF9 PE=1 SV=1	Serine/arginine-rich splicing factor 9 OS=Mus musculus GN=Srsf9 PE=1 SV=1	SRSF9	0.869			1.234			0.936			0.882092	0.893771	0.86507	1.09156	1.10642	1.07836	1.03134	1.00257	1.03592	0.985158			1.13049			0.907559			1.24564		1.14752		1.0855
F1RJJ0	221	Y	Uncharacterized protein	Serine/arginine-rich splicing factor 9 OS=Homo sapiens GN=SRSF9 PE=1 SV=1	Serine/arginine-rich splicing factor 9 OS=Mus musculus GN=Srsf9 PE=1 SV=1	SRSF9		0.338	0.614		2.285	1.845		0.565	0.585	0.882092	0.893771	0.86507	1.09156	1.10642	1.07836	1.03134	1.00257	1.03592		0.378173	0.709769		2.06522	1.71094		0.563551	0.564713	3.34687	0.0846726	3.47092	0.0313753	0.964262	0.922966
F1RJJ0	189	S	Uncharacterized protein	Serine/arginine-rich splicing factor 9 OS=Homo sapiens GN=SRSF9 PE=1 SV=1	Serine/arginine-rich splicing factor 9 OS=Mus musculus GN=Srsf9 PE=1 SV=1	SRSF9	0.333	0.365	0.322	2.301	2.328	2.297	0.519	0.504	0.434	0.882092	0.893771	0.86507	1.09156	1.10642	1.07836	1.03134	1.00257	1.03592	0.377512	0.408382	0.372224	2.10798	2.10408	2.13009	0.50323	0.502707	0.41895	4.45099	0.00010477	5.47626	1.00842e-07	0.812779	0.070799
F1RJJ0	204	S	Uncharacterized protein	Serine/arginine-rich splicing factor 9 OS=Homo sapiens GN=SRSF9 PE=1 SV=1	Serine/arginine-rich splicing factor 9 OS=Mus musculus GN=Srsf9 PE=1 SV=1	SRSF9	0.455	0.353	0.341	2.123	2.299	2.359	0.558	0.539	0.359	0.882092	0.893771	0.86507	1.09156	1.10642	1.07836	1.03134	1.00257	1.03592	0.515819	0.394956	0.394188	1.94492	2.07787	2.18759	0.541045	0.537617	0.346551	4.35751	7.8252e-05	4.75904	0.00017656	0.915627	0.630356
F1RJJ0	206	Y	Uncharacterized protein	Serine/arginine-rich splicing factor 9 OS=Homo sapiens GN=SRSF9 PE=1 SV=1	Serine/arginine-rich splicing factor 9 OS=Mus musculus GN=Srsf9 PE=1 SV=1	SRSF9	0.357	0.304	0.4	2.34	2.444	2.178	0.465	0.463	0.473	0.882092	0.893771	0.86507	1.09156	1.10642	1.07836	1.03134	1.00257	1.03592	0.40472	0.340132	0.46239	2.14371	2.20893	2.01974	0.450871	0.461812	0.456597	4.65382	0.00106982	5.27846	4.92405e-05	0.881662	0.265202
F1RJJ0	211	S	Uncharacterized protein	Serine/arginine-rich splicing factor 9 OS=Homo sapiens GN=SRSF9 PE=1 SV=1	Serine/arginine-rich splicing factor 9 OS=Mus musculus GN=Srsf9 PE=1 SV=1	SRSF9	0.562	0.617	0.624	1.79	1.648	1.582	0.745	0.832	0.818	0.882092	0.893771	0.86507	1.09156	1.10642	1.07836	1.03134	1.00257	1.03592	0.637122	0.690333	0.721329	1.63985	1.48949	1.46705	0.722363	0.829866	0.789633	1.96271	0.000907004	2.24347	0.00108997	0.874853	0.0739294
F1RJJ0	216	S	Uncharacterized protein	Serine/arginine-rich splicing factor 9 OS=Homo sapiens GN=SRSF9 PE=1 SV=1	Serine/arginine-rich splicing factor 9 OS=Mus musculus GN=Srsf9 PE=1 SV=1	SRSF9		0.74			1.356			0.959		0.882092	0.893771	0.86507	1.09156	1.10642	1.07836	1.03134	1.00257	1.03592		0.827952			1.22557			0.95654		1.28126		1.48025		0.86557
F1RJJ0	214	Y	Uncharacterized protein	Serine/arginine-rich splicing factor 9 OS=Homo sapiens GN=SRSF9 PE=1 SV=1	Serine/arginine-rich splicing factor 9 OS=Mus musculus GN=Srsf9 PE=1 SV=1	SRSF9	0.482	0.431	0.522	2.033	2.139	1.898	0.612	0.598	0.62	0.882092	0.893771	0.86507	1.09156	1.10642	1.07836	1.03134	1.00257	1.03592	0.546428	0.482226	0.603419	1.86246	1.93326	1.76009	0.593404	0.596466	0.5985	3.10664	0.00158561	3.40414	6.77053e-05	0.912604	0.274972
F1RJM5	1001	T	Uncharacterized protein	Probable E3 ubiquitin-protein ligase HECTD4 OS=Homo sapiens GN=HECTD4 PE=1 SV=5	E3 ubiquitin-protein ligase HERC2 OS=Mus musculus GN=Herc2 PE=1 SV=3	---	0.741	0.714	0.75	1.588	1.497	1.492	0.752	0.866	0.786
F1RJP9	718	S	Uncharacterized protein	Kinesin-like protein KIF13B OS=Homo sapiens GN=KIF13B PE=1 SV=2	Kinesin-like protein KIF13A OS=Mus musculus GN=Kif13a PE=1 SV=1	KIF13B	0.743		1.038	1.418		0.835	0.895		1.132	1.00297	1.00365	0.961857	0.910679	0.967135	0.933724	1.10282	1.03137	1.06116	0.740802		1.07916	1.55708		0.894268	0.811558		1.06676	1.30508	0.541619	1.34692	0.510718	0.968933	0.903933
F1RJP9	1706	S	Uncharacterized protein	Kinesin-like protein KIF13B OS=Homo sapiens GN=KIF13B PE=1 SV=2	Kinesin-like protein KIF13A OS=Mus musculus GN=Kif13a PE=1 SV=1	KIF13B	0.586		0.652	1.802		1.652	0.712		0.728	1.00297	1.00365	0.961857	0.910679	0.967135	0.933724	1.10282	1.03137	1.06116	0.584267		0.677856	1.97874		1.76926	0.645619		0.686044	2.81453	0.0475485	2.9696	0.0263506	0.947779	0.592523
F1RJP9	1396	S	Uncharacterized protein	Kinesin-like protein KIF13B OS=Homo sapiens GN=KIF13B PE=1 SV=2	Kinesin-like protein KIF13A OS=Mus musculus GN=Kif13a PE=1 SV=1	KIF13B	0.776		0.849	1.449		1.308	0.838		0.867	1.00297	1.00365	0.961857	0.910679	0.967135	0.933724	1.10282	1.03137	1.06116	0.773705		0.882668	1.59112		1.40084	0.759872		0.817034	1.89736	0.0651687	1.80633	0.0433526	1.05039	0.602443
F1RJQ5	490	S	Uncharacterized protein	Integrator complex subunit 9 OS=Homo sapiens GN=INTS9 PE=1 SV=2	Integrator complex subunit 9 OS=Mus musculus GN=Ints9 PE=1 SV=1	INTS9	0.867	0.723	0.816	1.238	1.328	1.354	0.934	0.998	0.854	1.16981	1.10457	1.03275	0.739173	0.749628	0.843772	1.08338	1.02051	1.12562	0.741144	0.654551	0.790124	1.67485	1.77155	1.6047	0.862114	0.977946	0.758694	1.94366	0.000712217	2.31085	0.000137369	0.841103	0.152738
F1RJS0	327	S	Uncharacterized protein	N-acetyltransferase ESCO2 OS=Homo sapiens GN=ESCO2 PE=1 SV=1	N-acetyltransferase ESCO2 OS=Mus musculus GN=Esco2 PE=2 SV=3	ESCO2	0.554		0.666	1.974		1.818	0.595		0.563
F1RJS0	252	S	Uncharacterized protein	N-acetyltransferase ESCO2 OS=Homo sapiens GN=ESCO2 PE=1 SV=1	N-acetyltransferase ESCO2 OS=Mus musculus GN=Esco2 PE=2 SV=3	ESCO2	0.463	0.521		2.128	1.99		0.547	0.638
F1RJT5	166	S	Uncharacterized protein	BCL2/adenovirus E1B 19 kDa protein-interacting protein 3-like OS=Homo sapiens GN=BNIP3L PE=1 SV=1	BCL2/adenovirus E1B 19 kDa protein-interacting protein 3-like OS=Mus musculus GN=Bnip3l PE=1 SV=1	BNIP3L	0.54	0.492	0.733	1.878	2.128	1.475	0.689	0.551	0.817
F1RJT5	120	S	Uncharacterized protein	BCL2/adenovirus E1B 19 kDa protein-interacting protein 3-like OS=Homo sapiens GN=BNIP3L PE=1 SV=1	BCL2/adenovirus E1B 19 kDa protein-interacting protein 3-like OS=Mus musculus GN=Bnip3l PE=1 SV=1	BNIP3L	0.363	0.584		2.4	1.73		0.407	0.795
F1RJT5	118	S	Uncharacterized protein	BCL2/adenovirus E1B 19 kDa protein-interacting protein 3-like OS=Homo sapiens GN=BNIP3L PE=1 SV=1	BCL2/adenovirus E1B 19 kDa protein-interacting protein 3-like OS=Mus musculus GN=Bnip3l PE=1 SV=1	BNIP3L	0.361			2.424			0.389
F1RJU3	1752	S	Uncharacterized protein	Dedicator of cytokinesis protein 5 OS=Homo sapiens GN=DOCK5 PE=1 SV=3	Dedicator of cytokinesis protein 5 OS=Mus musculus GN=Dock5 PE=1 SV=2	DOCK5	0.606	0.63		1.875	1.773		0.633	0.716		1.09085	1.08094	1.08524	0.801639	0.795207	0.791843	1.08993	1.09553	1.12133	0.555531	0.582824		2.33896	2.22961		0.580771	0.653562		3.70124	0.00305949	4.0133	0.0140856	0.922243	0.39755
F1RJU7	403	S	Uncharacterized protein	Protein Shroom1 OS=Homo sapiens GN=SHROOM1 PE=1 SV=1	Protein Shroom1 OS=Mus musculus GN=Shroom1 PE=1 SV=2	SHROOM1	0.755			1.443			0.863			0.820178		0.991004	1.30404		0.903394	0.886227		1.10436	0.920532			1.10656			0.973791			1.13634		1.20209		0.945307
F1RJU7	385	S	Uncharacterized protein	Protein Shroom1 OS=Homo sapiens GN=SHROOM1 PE=1 SV=1	Protein Shroom1 OS=Mus musculus GN=Shroom1 PE=1 SV=2	SHROOM1	0.694	0.687	0.707	1.372	1.481	1.368	0.979	0.904	0.939	0.820178		0.991004	1.30404		0.903394	0.886227		1.10436	0.846158		0.713418	1.05211		1.51429	1.10468		0.850264	1.31277	0.393925	1.64558	0.255014	0.797759	0.337568
F1RJU7	264	T	Uncharacterized protein	Protein Shroom1 OS=Homo sapiens GN=SHROOM1 PE=1 SV=1	Protein Shroom1 OS=Mus musculus GN=Shroom1 PE=1 SV=2	SHROOM1	0.553	0.602		1.897	1.792		0.661	0.726		0.820178		0.991004	1.30404		0.903394	0.886227		1.10436	0.674244			1.45471			0.745858			1.95038		2.15754		0.903984
F1RJU7	133	S	Uncharacterized protein	Protein Shroom1 OS=Homo sapiens GN=SHROOM1 PE=1 SV=1	Protein Shroom1 OS=Mus musculus GN=Shroom1 PE=1 SV=2	SHROOM1	0.702	0.683	0.757	1.593	1.649	1.381	0.783	0.769	0.882	0.820178		0.991004	1.30404		0.903394	0.886227		1.10436	0.855912		0.763872	1.22159		1.52868	0.883521		0.79865	1.63495	0.15774	1.69792	0.145353	0.962913	0.667952
F1RJV4	572	S	Uncharacterized protein	Solute carrier family 22 member 5 OS=Homo sapiens GN=SLC22A5 PE=1 SV=1	Solute carrier family 22 member 5 OS=Mus musculus GN=Slc22a5 PE=1 SV=1	SLC22A5	0.321	0.403	0.465	2.377	2.279	1.962	0.466	0.509	0.613
F1RJW8	128	S	Uncharacterized protein	DDB1- and CUL4-associated factor 8 OS=Homo sapiens GN=DCAF8 PE=1 SV=1	DDB1- and CUL4-associated factor 8 OS=Mus musculus GN=Dcaf8 PE=1 SV=1	DCAF8	0.98	0.924		1.226	1.367		0.84	0.778		1.09884	1.12293		0.877138	0.831248		1.02204	1.05804		0.891846	0.82285		1.39773	1.64452		0.821887	0.73532		1.95365	0.0772848	1.77422	0.0971989	1.10114	0.296506
F1RJW8	129	S	Uncharacterized protein	DDB1- and CUL4-associated factor 8 OS=Homo sapiens GN=DCAF8 PE=1 SV=1	DDB1- and CUL4-associated factor 8 OS=Mus musculus GN=Dcaf8 PE=1 SV=1	DCAF8	0.958	0.916	0.916	1.227	1.384	1.262	0.86	0.773	0.847	1.09884	1.12293		0.877138	0.831248		1.02204	1.05804		0.871825	0.815726		1.39887	1.66497		0.841455	0.730594		1.94894	0.076342	1.81555	0.109414	1.07347	0.478694
F1RJX0	440	S	Uncharacterized protein	A-kinase anchor protein 11 OS=Homo sapiens GN=AKAP11 PE=1 SV=1	A-kinase anchor protein SPHKAP OS=Mus musculus GN=Sphkap PE=1 SV=2	AKAP11	0.737	0.658		1.572	1.644		0.77	0.798
F1RJX8	402	S	Coatomer subunit alpha			COPA	0.378	0.334	0.515	2.348	2.427	2.035	0.438	0.45	0.5	1.08182	1.04313	1.07293	0.879451	0.895032	0.803083	1.02801	1.03685	1.12193	0.349411	0.320189	0.479993	2.66985	2.71163	2.53398	0.426067	0.434006	0.445662	6.06208	0.000521736	6.88545	6.92116e-06	0.880418	0.400534
F1RJX8	591	T	Coatomer subunit alpha			COPA	0.629	0.616	0.743	1.646	1.712	1.385	0.806	0.779	0.893	1.08182	1.04313	1.07293	0.879451	0.895032	0.803083	1.02801	1.03685	1.12193	0.581428	0.590528	0.692495	1.87162	1.91278	1.7246	0.784041	0.751313	0.795952	2.36306	0.00188574	2.95476	0.000186769	0.799745	0.0357144
F1RJX8	173	S	Coatomer subunit alpha			COPA	0.788	0.815	0.822	1.457	1.37	1.327	0.82	0.877	0.873	1.08182	1.04313	1.07293	0.879451	0.895032	0.803083	1.02801	1.03685	1.12193	0.728402	0.781299	0.766125	1.65672	1.53067	1.65238	0.79766	0.84583	0.778126	1.99857	0.000493739	2.1266	0.000751135	0.939797	0.133921
F1RJZ4	28	S	Uncharacterized protein	GPALPP motifs-containing protein 1 OS=Homo sapiens GN=GPALPP1 PE=1 SV=1	GPALPP motifs-containing protein 1 OS=Mus musculus GN=Gpalpp1 PE=1 SV=2	GPALPP1	0.496	0.512	0.576	2.07	2.107	1.876	0.567	0.55	0.59	0.451044	0.694817	0.459973	2.03598	1.50204	2.04309	0.563639	0.836841	0.454511	1.09967	0.736884	1.25225	1.01671	1.40276	0.918218	1.00596	0.657234	1.2981	1.1271	0.62588	1.08058	0.716356	1.04306	0.868419
F1RJZ4	105	S	Uncharacterized protein	GPALPP motifs-containing protein 1 OS=Homo sapiens GN=GPALPP1 PE=1 SV=1	GPALPP motifs-containing protein 1 OS=Mus musculus GN=Gpalpp1 PE=1 SV=2	GPALPP1	0.379	0.427	0.339	2.266	2.138	2.293	0.506	0.602	0.422	0.451044	0.694817	0.459973	2.03598	1.50204	2.04309	0.563639	0.836841	0.454511	0.840273	0.61455	0.737001	1.11298	1.4234	1.12232	0.897738	0.719372	0.92847	1.43727	0.0463924	1.66925	0.0214571	0.861031	0.270173
F1RK00	1030	T	Uncharacterized protein	Zinc finger CCCH domain-containing protein 13 OS=Homo sapiens GN=ZC3H13 PE=1 SV=1	Zinc finger CCCH domain-containing protein 13 OS=Mus musculus GN=Zc3h13 PE=1 SV=1	ZC3H13	0.609		0.598	1.769		1.705	0.72		0.729	0.907006	0.762951	0.791646	1.17565	1.37227	1.22913	0.894901	0.874265	0.953164	0.67144		0.755388	1.50469		1.38716	0.804558		0.764821	1.84267	0.0369968	2.02677	0.013267	0.909167	0.309897
F1RK00	207	S	Uncharacterized protein	Zinc finger CCCH domain-containing protein 13 OS=Homo sapiens GN=ZC3H13 PE=1 SV=1	Zinc finger CCCH domain-containing protein 13 OS=Mus musculus GN=Zc3h13 PE=1 SV=1	ZC3H13		0.595	0.513		1.762	2.009		0.757	0.527	0.907006	0.762951	0.791646	1.17565	1.37227	1.22913	0.894901	0.874265	0.953164		0.779867	0.648017		1.28401	1.63449		0.86587	0.552895	2.05707	0.0871424	2.04393	0.113785	1.00643	0.982005
F1RK00	198	S	Uncharacterized protein	Zinc finger CCCH domain-containing protein 13 OS=Homo sapiens GN=ZC3H13 PE=1 SV=1	Zinc finger CCCH domain-containing protein 13 OS=Mus musculus GN=Zc3h13 PE=1 SV=1	ZC3H13	0.559	0.483	0.583	1.962	2.008	1.797	0.6	0.659	0.657	0.907006	0.762951	0.791646	1.17565	1.37227	1.22913	0.894901	0.874265	0.953164	0.616313	0.633068	0.73644	1.66886	1.46327	1.46201	0.670465	0.753776	0.689283	2.17369	0.00314088	2.31347	0.00135435	0.939579	0.407113
F1RK00	266	S	Uncharacterized protein	Zinc finger CCCH domain-containing protein 13 OS=Homo sapiens GN=ZC3H13 PE=1 SV=1	Zinc finger CCCH domain-containing protein 13 OS=Mus musculus GN=Zc3h13 PE=1 SV=1	ZC3H13	1.055	0.859	0.877	1.21	1.156	1.286	0.787	1.013	0.862	0.907006	0.762951	0.791646	1.17565	1.37227	1.22913	0.894901	0.874265	0.953164	1.16317	1.12589	1.10782	1.02921	0.842401	1.04627	0.879427	1.15869	0.904357	0.991645	0.944781	0.85899	0.127072	1.15443	0.22906
F1RK00	1371	S	Uncharacterized protein	Zinc finger CCCH domain-containing protein 13 OS=Homo sapiens GN=ZC3H13 PE=1 SV=1	Zinc finger CCCH domain-containing protein 13 OS=Mus musculus GN=Zc3h13 PE=1 SV=1	ZC3H13	0.415	0.426		2.225	2.186		0.509	0.564		0.907006	0.762951	0.791646	1.17565	1.37227	1.22913	0.894901	0.874265	0.953164	0.457549	0.558358		1.89256	1.59298		0.568778	0.645113		2.87138	0.0684625	3.43097	0.0541222	0.836902	0.2667
F1RK00	394	S	Uncharacterized protein	Zinc finger CCCH domain-containing protein 13 OS=Homo sapiens GN=ZC3H13 PE=1 SV=1	Zinc finger CCCH domain-containing protein 13 OS=Mus musculus GN=Zc3h13 PE=1 SV=1	ZC3H13	0.478			2.169			0.499			0.907006	0.762951	0.791646	1.17565	1.37227	1.22913	0.894901	0.874265	0.953164	0.527009			1.84493			0.557604			3.30868		3.50076		0.945131
F1RK00	850	S	Uncharacterized protein	Zinc finger CCCH domain-containing protein 13 OS=Homo sapiens GN=ZC3H13 PE=1 SV=1	Zinc finger CCCH domain-containing protein 13 OS=Mus musculus GN=Zc3h13 PE=1 SV=1	ZC3H13	0.209			2.695			0.298			0.907006	0.762951	0.791646	1.17565	1.37227	1.22913	0.894901	0.874265	0.953164	0.230428			2.29234			0.332998			6.88395		9.94817		0.691982
F1RK00	360	Y	Uncharacterized protein	Zinc finger CCCH domain-containing protein 13 OS=Homo sapiens GN=ZC3H13 PE=1 SV=1	Zinc finger CCCH domain-containing protein 13 OS=Mus musculus GN=Zc3h13 PE=1 SV=1	ZC3H13	0.404			2.241			0.506			0.907006	0.762951	0.791646	1.17565	1.37227	1.22913	0.894901	0.874265	0.953164	0.445421			1.90617			0.565426			3.37122		4.27948		0.787763
F1RK00	363	T	Uncharacterized protein	Zinc finger CCCH domain-containing protein 13 OS=Homo sapiens GN=ZC3H13 PE=1 SV=1	Zinc finger CCCH domain-containing protein 13 OS=Mus musculus GN=Zc3h13 PE=1 SV=1	ZC3H13	0.49	0.399		2.132	2.273		0.518	0.518		0.907006	0.762951	0.791646	1.17565	1.37227	1.22913	0.894901	0.874265	0.953164	0.540239	0.522969		1.81346	1.65638		0.578835	0.592497		2.9623	0.0419928	3.26356	0.0392699	0.907691	0.0432664
F1RK00	990	S	Uncharacterized protein	Zinc finger CCCH domain-containing protein 13 OS=Homo sapiens GN=ZC3H13 PE=1 SV=1	Zinc finger CCCH domain-containing protein 13 OS=Mus musculus GN=Zc3h13 PE=1 SV=1	ZC3H13	0.644	0.593	0.758	1.591	1.741	1.489	0.838	0.776	0.783	0.907006	0.762951	0.791646	1.17565	1.37227	1.22913	0.894901	0.874265	0.953164	0.710028	0.777245	0.957499	1.35329	1.2687	1.21143	0.936416	0.887602	0.821475	1.44904	0.0020277	1.56801	0.0106908	0.924127	0.473884
F1RK00	77	S	Uncharacterized protein	Zinc finger CCCH domain-containing protein 13 OS=Homo sapiens GN=ZC3H13 PE=1 SV=1	Zinc finger CCCH domain-containing protein 13 OS=Mus musculus GN=Zc3h13 PE=1 SV=1	ZC3H13	0.782	0.578	0.791	1.669	1.81	1.495	0.646	0.734	0.747	0.907006	0.762951	0.791646	1.17565	1.37227	1.22913	0.894901	0.874265	0.953164	0.862177	0.757585	0.999184	1.41964	1.31898	1.21631	0.721868	0.839562	0.783706	1.68644	0.00330276	1.51012	0.00881809	1.11676	0.328037
F1RK00	644	S	Uncharacterized protein	Zinc finger CCCH domain-containing protein 13 OS=Homo sapiens GN=ZC3H13 PE=1 SV=1	Zinc finger CCCH domain-containing protein 13 OS=Mus musculus GN=Zc3h13 PE=1 SV=1	ZC3H13	0.53	0.54		2.046	1.993		0.556	0.618		0.907006	0.762951	0.791646	1.17565	1.37227	1.22913	0.894901	0.874265	0.953164	0.58434	0.707778		1.74031	1.45234		0.621298	0.706879		2.40378	0.0768754	2.47086	0.0604841	0.972851	0.835038
F1RK00	388	S	Uncharacterized protein	Zinc finger CCCH domain-containing protein 13 OS=Homo sapiens GN=ZC3H13 PE=1 SV=1	Zinc finger CCCH domain-containing protein 13 OS=Mus musculus GN=Zc3h13 PE=1 SV=1	ZC3H13	0.435			2.042			0.646			0.907006	0.762951	0.791646	1.17565	1.37227	1.22913	0.894901	0.874265	0.953164	0.4796			1.73691			0.721868			2.40613		3.62157		0.664387
F1RK00	355	T	Uncharacterized protein	Zinc finger CCCH domain-containing protein 13 OS=Homo sapiens GN=ZC3H13 PE=1 SV=1	Zinc finger CCCH domain-containing protein 13 OS=Mus musculus GN=Zc3h13 PE=1 SV=1	ZC3H13	0.404			2.241			0.506			0.907006	0.762951	0.791646	1.17565	1.37227	1.22913	0.894901	0.874265	0.953164	0.445421			1.90617			0.565426			3.37122		4.27948		0.787763
F1RK00	1187	S	Uncharacterized protein	Zinc finger CCCH domain-containing protein 13 OS=Homo sapiens GN=ZC3H13 PE=1 SV=1	Zinc finger CCCH domain-containing protein 13 OS=Mus musculus GN=Zc3h13 PE=1 SV=1	ZC3H13	0.727	0.655	0.739	1.532	1.562	1.578	0.813	0.867	0.718	0.907006	0.762951	0.791646	1.17565	1.37227	1.22913	0.894901	0.874265	0.953164	0.801538	0.858509	0.933498	1.3031	1.13826	1.28384	0.90848	0.99169	0.753281	1.40391	0.0174045	1.43634	0.00556366	0.977423	0.817705
F1RK00	1007	S	Uncharacterized protein	Zinc finger CCCH domain-containing protein 13 OS=Homo sapiens GN=ZC3H13 PE=1 SV=1	Zinc finger CCCH domain-containing protein 13 OS=Mus musculus GN=Zc3h13 PE=1 SV=1	ZC3H13	0.701	0.462	0.355	1.658	2.178	2.281	0.729	0.537	0.418	0.907006	0.762951	0.791646	1.17565	1.37227	1.22913	0.894901	0.874265	0.953164	0.772872	0.605544	0.448433	1.41028	1.58715	1.85579	0.814615	0.61423	0.438539	2.59894	0.00456622	2.65661	0.00439107	0.978293	0.929578
F1RK00	64	S	Uncharacterized protein	Zinc finger CCCH domain-containing protein 13 OS=Homo sapiens GN=ZC3H13 PE=1 SV=1	Zinc finger CCCH domain-containing protein 13 OS=Mus musculus GN=Zc3h13 PE=1 SV=1	ZC3H13										0.907006	0.762951	0.791646	1.17565	1.37227	1.22913	0.894901	0.874265	0.953164
F1RK00	326	S	Uncharacterized protein	Zinc finger CCCH domain-containing protein 13 OS=Homo sapiens GN=ZC3H13 PE=1 SV=1	Zinc finger CCCH domain-containing protein 13 OS=Mus musculus GN=Zc3h13 PE=1 SV=1	ZC3H13	0.518	0.507	0.539	2.08	1.972	1.888	0.538	0.666	0.614	0.907006	0.762951	0.791646	1.17565	1.37227	1.22913	0.894901	0.874265	0.953164	0.57111	0.664525	0.68086	1.76923	1.43704	1.53605	0.601184	0.761782	0.64417	2.36273	0.00412313	2.47447	0.00589634	0.95484	0.637887
F1RK00	243	S	Uncharacterized protein	Zinc finger CCCH domain-containing protein 13 OS=Homo sapiens GN=ZC3H13 PE=1 SV=1	Zinc finger CCCH domain-containing protein 13 OS=Mus musculus GN=Zc3h13 PE=1 SV=1	ZC3H13	0.656		0.601	1.747		1.85	0.695		0.593	0.907006	0.762951	0.791646	1.17565	1.37227	1.22913	0.894901	0.874265	0.953164	0.723259		0.759178	1.48598		1.50513	0.776622		0.622139	2.1384	0.0581104	2.0177	0.00307888	1.05982	0.683912
F1RK00	319	S	Uncharacterized protein	Zinc finger CCCH domain-containing protein 13 OS=Homo sapiens GN=ZC3H13 PE=1 SV=1	Zinc finger CCCH domain-containing protein 13 OS=Mus musculus GN=Zc3h13 PE=1 SV=1	ZC3H13	0.516	0.524		2.092	1.897		0.531	0.712		0.907006	0.762951	0.791646	1.17565	1.37227	1.22913	0.894901	0.874265	0.953164	0.568905	0.686807		1.77944	1.38238		0.593362	0.814398		2.24599	0.0887689	2.51795	0.108239	0.891993	0.621666
F1RK00	209	S	Uncharacterized protein	Zinc finger CCCH domain-containing protein 13 OS=Homo sapiens GN=ZC3H13 PE=1 SV=1	Zinc finger CCCH domain-containing protein 13 OS=Mus musculus GN=Zc3h13 PE=1 SV=1	ZC3H13	0.488	0.595	0.566	2.057	1.771	1.789	0.585	0.75	0.68	0.907006	0.762951	0.791646	1.17565	1.37227	1.22913	0.894901	0.874265	0.953164	0.538034	0.779867	0.714966	1.74966	1.29056	1.4555	0.653704	0.857863	0.713414	2.02057	0.0171369	2.21152	0.0118355	0.913656	0.535465
F1RK00	874	S	Uncharacterized protein	Zinc finger CCCH domain-containing protein 13 OS=Homo sapiens GN=ZC3H13 PE=1 SV=1	Zinc finger CCCH domain-containing protein 13 OS=Mus musculus GN=Zc3h13 PE=1 SV=1	ZC3H13	0.546	0.61	0.559	2.018	1.841	1.908	0.565	0.678	0.576	0.907006	0.762951	0.791646	1.17565	1.37227	1.22913	0.894901	0.874265	0.953164	0.60198	0.799527	0.706124	1.71649	1.34158	1.55232	0.631355	0.775508	0.604303	2.29239	0.00619768	2.18747	0.00630375	1.04796	0.701277
F1RK00	940	S	Uncharacterized protein	Zinc finger CCCH domain-containing protein 13 OS=Homo sapiens GN=ZC3H13 PE=1 SV=1	Zinc finger CCCH domain-containing protein 13 OS=Mus musculus GN=Zc3h13 PE=1 SV=1	ZC3H13	0.608	0.684		1.687	1.586		0.789	0.82		0.907006	0.762951	0.791646	1.17565	1.37227	1.22913	0.894901	0.874265	0.953164	0.670337	0.896519		1.43495	1.15575		0.881662	0.93793		1.42378	0.209883	1.65344	0.109332	0.861103	0.458219
F1RK00	1014	S	Uncharacterized protein	Zinc finger CCCH domain-containing protein 13 OS=Homo sapiens GN=ZC3H13 PE=1 SV=1	Zinc finger CCCH domain-containing protein 13 OS=Mus musculus GN=Zc3h13 PE=1 SV=1	ZC3H13	0.61	0.439	0.554	1.849	2.202	2.005	0.65	0.539	0.492	0.907006	0.762951	0.791646	1.17565	1.37227	1.22913	0.894901	0.874265	0.953164	0.672542	0.575398	0.699808	1.57274	1.60464	1.63124	0.726337	0.616518	0.516176	2.58663	0.00216457	2.46881	0.000299685	1.04772	0.704169
F1RK06	447	S	Uncharacterized protein	Leucine-rich repeat and calponin homology domain-containing protein 1 OS=Homo sapiens GN=LRCH1 PE=1 SV=3	Leucine-rich repeat and calponin homology domain-containing protein 1 OS=Mus musculus GN=Lrch1 PE=1 SV=2	LRCH1	0.928			1.15			0.953			1.08991	1.19438		0.793916	0.806483		1.10635	0.992589		0.851445			1.44852			0.86139			1.6816		1.70125		0.988455
F1RK06	541	S	Uncharacterized protein	Leucine-rich repeat and calponin homology domain-containing protein 1 OS=Homo sapiens GN=LRCH1 PE=1 SV=3	Leucine-rich repeat and calponin homology domain-containing protein 1 OS=Mus musculus GN=Lrch1 PE=1 SV=2	LRCH1	0.829	0.79	0.816	1.363	1.471	1.408	0.864	0.817	0.804	1.08991	1.19438		0.793916	0.806483		1.10635	0.992589		0.760612	0.661428		1.71681	1.82397		0.780945	0.8231		2.2074	0.01755	2.48993	0.00483098	0.886534	0.288921
F1RK14	382	T	Uncharacterized protein	Retinoblastoma-associated protein OS=Homo sapiens GN=RB1 PE=1 SV=2	Retinoblastoma-associated protein OS=Mus musculus GN=Rb1 PE=1 SV=2	RB1	0.52	0.435	0.641	2.008	2.097	1.624	0.596	0.629	0.764	0.986035	1.0299	1.01889	1.16689	1.08241	1.07742	0.860069	0.899941	0.903343	0.527364	0.422371	0.629115	1.72082	1.93735	1.5073	0.692968	0.698935	0.845747	2.30843	0.00816664	3.27166	0.00377195	0.705584	0.049473
F1RK14	831	T	Uncharacterized protein	Retinoblastoma-associated protein OS=Homo sapiens GN=RB1 PE=1 SV=2	Retinoblastoma-associated protein OS=Mus musculus GN=Rb1 PE=1 SV=2	RB1	0.817	0.78		1.588	1.532		0.682	0.775		0.986035	1.0299	1.01889	1.16689	1.08241	1.07742	0.860069	0.899941	0.903343	0.828571	0.757354		1.36088	1.41536		0.79296	0.861168		1.67838	0.0071756	1.75055	0.0072356	0.958768	0.560783
F1RK14	576	S	Uncharacterized protein	Retinoblastoma-associated protein OS=Homo sapiens GN=RB1 PE=1 SV=2	Retinoblastoma-associated protein OS=Mus musculus GN=Rb1 PE=1 SV=2	RB1	0.99	1.17	1.022	1.11	0.824	0.896	0.93	1	1.088	0.986035	1.0299	1.01889	1.16689	1.08241	1.07742	0.860069	0.899941	0.903343	1.00402	1.13603	1.00305	0.951248	0.761266	0.831615	1.08131	1.11118	1.20441	0.748954	0.0173962	0.809432	0.0507823	0.925284	0.218294
F1RK23	38	S	Uncharacterized protein	Importin subunit alpha-4 OS=Homo sapiens GN=KPNA3 PE=1 SV=2	Importin subunit alpha-4 OS=Mus musculus GN=Kpna3 PE=1 SV=1	---	0.676	0.676	0.706	1.743	1.839	1.77	0.681	0.619	0.568	0.677865		0.956786	1.57919		1.14831	0.818393		0.858691	0.997249		0.737887	1.10373		1.5414	0.832118		0.661472	1.77099	0.198029	1.52445	0.243625	1.16172	0.528783
F1RK39	197	S	Uncharacterized protein	Zinc finger protein 174 OS=Homo sapiens GN=ZNF174 PE=1 SV=1	Zinc finger protein 24 OS=Mus musculus GN=Znf24 PE=1 SV=1	ZNF174	0.476	0.509	0.443	2.108	1.968	2.108	0.553	0.668	0.498		0.981494			1.34347			0.71407			0.518597			1.46486			0.935483		1.56589		2.82466		0.554363
F1RK43	1025	S	Uncharacterized protein	Structure-specific endonuclease subunit SLX4 OS=Homo sapiens GN=SLX4 PE=1 SV=3	Structure-specific endonuclease subunit SLX4 OS=Mus musculus GN=Slx4 PE=1 SV=1	SLX4	0.591	0.7	0.643	1.747	1.642	1.667	0.755	0.76	0.724	0.884603	1.11766		1.15051	0.994472		0.967798	0.897095		0.668096	0.626308		1.51845	1.65113		0.780121	0.847179		1.94775	0.02328	2.44868	0.0297044	0.79543	0.0700635
F1RK43	1144	S	Uncharacterized protein	Structure-specific endonuclease subunit SLX4 OS=Homo sapiens GN=SLX4 PE=1 SV=3	Structure-specific endonuclease subunit SLX4 OS=Mus musculus GN=Slx4 PE=1 SV=1	SLX4	0.499	0.542	0.523	2.085	1.995	1.942	0.552	0.614	0.578	0.884603	1.11766		1.15051	0.994472		0.967798	0.897095		0.564095	0.484941		1.81224	2.00609		0.570367	0.684432		3.04298	0.015462	3.63984	0.0228205	0.83602	0.290737
F1RK43	420	S	Uncharacterized protein	Structure-specific endonuclease subunit SLX4 OS=Homo sapiens GN=SLX4 PE=1 SV=3	Structure-specific endonuclease subunit SLX4 OS=Mus musculus GN=Slx4 PE=1 SV=1	SLX4	0.726	0.585	0.621	1.691	1.713	1.678	0.677	0.807	0.733	0.884603	1.11766		1.15051	0.994472		0.967798	0.897095		0.820707	0.523414		1.46978	1.72252		0.699526	0.899571		1.99632	0.0427389	2.37501	0.0439157	0.840551	0.55946
F1RK43	293	S	Uncharacterized protein	Structure-specific endonuclease subunit SLX4 OS=Homo sapiens GN=SLX4 PE=1 SV=3	Structure-specific endonuclease subunit SLX4 OS=Mus musculus GN=Slx4 PE=1 SV=1	SLX4	0.766	0.82	0.768	1.661	1.376	1.491	0.667	0.868	0.772	0.884603	1.11766		1.15051	0.994472		0.967798	0.897095		0.865925	0.733675		1.44371	1.38365		0.689193	0.967568		1.70655	0.13548	1.76754	0.0362718	0.965498	0.875699
F1RK46	2070	S	Uncharacterized protein	CREB-binding protein OS=Homo sapiens GN=CREBBP PE=1 SV=3	CREB-binding protein OS=Mus musculus GN=Crebbp PE=1 SV=3	CREBBP	0.737			1.339			0.968			1.02029	0.973068	0.992242	0.977279	0.995787	0.960898	1.00224	1.02839	1.02105	0.722346			1.37013			0.965836			1.4186		1.89678		0.747896
F1RK64	658	S	Uncharacterized protein	Protein HIRA OS=Homo sapiens GN=HIRA PE=1 SV=2	Protein HIRA OS=Mus musculus GN=Hira PE=1 SV=3	HIRA	0.714			1.696			0.685			1.12046	1.08413	1.0043	0.848186	0.894103	0.98483	1.02876	1.01632	1.01117	0.637236			1.99956			0.66585			3.00302		3.13787		0.957026
F1RK78	439	T	Uncharacterized protein	Protein DGCR14 OS=Homo sapiens GN=DGCR14 PE=1 SV=1	Protein DGCR14 OS=Mus musculus GN=Dgcr14 PE=1 SV=2	DGCR14	0.685	0.633		1.702	1.682		0.707	0.788				0.917357			1.17072			0.90548
F1RK78	294	S	Uncharacterized protein	Protein DGCR14 OS=Homo sapiens GN=DGCR14 PE=1 SV=1	Protein DGCR14 OS=Mus musculus GN=Dgcr14 PE=1 SV=2	DGCR14	0.58	0.604	0.616	1.98	1.831	1.799	0.567	0.692	0.625			0.917357			1.17072			0.90548			0.671494			1.53666			0.690241	2.22626		2.28842		0.97284
F1RK84	605	T	Kelch-like family member 22			LOC100156352	0.759		0.727	1.559		1.551	0.761		0.753		1.07758			0.92807			0.992368
F1RK85	525	T	Uncharacterized protein	Mediator of RNA polymerase II transcription subunit 15 OS=Homo sapiens GN=MED15 PE=1 SV=2	Mediator of RNA polymerase II transcription subunit 15 OS=Mus musculus GN=Med15 PE=1 SV=2	MED15	0.507	0.737	0.625	2.02	1.488	1.844	0.599	0.853	0.576	1.02217	1.13099	0.961611	0.933352	0.830597	1.09323	1.05606	1.02416	0.936742	0.496001	0.651644	0.649951	2.16424	1.79148	1.68674	0.567205	0.83288	0.614897	2.80026	0.0045206	3.1389	0.006943	0.892115	0.502451
F1RK86	130	S	Uncharacterized protein	Putative oxidoreductase GLYR1 OS=Homo sapiens GN=GLYR1 PE=1 SV=3	Putative oxidoreductase GLYR1 OS=Mus musculus GN=Glyr1 PE=1 SV=1	GLYR1	0.765	0.687	0.9	1.535	1.613	1.406	0.774	0.796	0.729		1.09667			0.949776			0.981989			0.626443			1.69829			0.8106		2.09511		2.71101		0.772815
F1RK86	114	S	Uncharacterized protein	Putative oxidoreductase GLYR1 OS=Homo sapiens GN=GLYR1 PE=1 SV=3	Putative oxidoreductase GLYR1 OS=Mus musculus GN=Glyr1 PE=1 SV=1	GLYR1	1.344		1.14	0.811		0.822	0.861		1.05		1.09667			0.949776			0.981989
F1RK86	113	S	Uncharacterized protein	Putative oxidoreductase GLYR1 OS=Homo sapiens GN=GLYR1 PE=1 SV=3	Putative oxidoreductase GLYR1 OS=Mus musculus GN=Glyr1 PE=1 SV=1	GLYR1	1.196	0.928	1.109	0.965	1.054	0.875	0.865	1.032	1.029		1.09667			0.949776			0.981989			0.8462			1.10973			1.05093		1.05596		1.31143		0.805193
F1RK87	516	S	Uncharacterized protein	E3 ubiquitin-protein ligase MGRN1 OS=Homo sapiens GN=MGRN1 PE=1 SV=2	E3 ubiquitin-protein ligase MGRN1 OS=Mus musculus GN=Mgrn1 PE=1 SV=2	MGRN1	0.902	0.704	0.836	1.232	1.441	1.388	0.907	0.922	0.805	1.01286	0.970838		0.986114	1.27106		1.00094	0.787685		0.890544	0.725147		1.24935	1.1337		0.906145	1.17052		1.14754	0.44023	1.47494	0.0744866	0.778022	0.29935
F1RK87	460	S	Uncharacterized protein	E3 ubiquitin-protein ligase MGRN1 OS=Homo sapiens GN=MGRN1 PE=1 SV=2	E3 ubiquitin-protein ligase MGRN1 OS=Mus musculus GN=Mgrn1 PE=1 SV=2	MGRN1	0.698			1.545			0.829			1.01286	0.970838		0.986114	1.27106		1.00094	0.787685		0.689135			1.56676			0.828219			1.89172		2.27351		0.832069
F1RK94	28	S	Uncharacterized protein	Ubinuclein-1 OS=Homo sapiens GN=UBN1 PE=1 SV=2	Ubinuclein-1 OS=Mus musculus GN=Ubn1 PE=2 SV=1	---	0.716	0.718	0.766	1.541	1.45	1.54	0.814	0.903	0.728
F1RK95	171	S	Uncharacterized protein	Sphingomyelin phosphodiesterase 4 OS=Homo sapiens GN=SMPD4 PE=1 SV=2	Sphingomyelin phosphodiesterase 4 OS=Mus musculus GN=Smpd4 PE=1 SV=2	SMPD4		0.615			1.936			0.596		0.994695	1.05733	0.981212	0.954899	0.965146	0.953769	1.00197	0.978216	1.0795		0.581652			2.00591			0.609272		3.29231		3.44865		0.954666
F1RK95	794	S	Uncharacterized protein	Sphingomyelin phosphodiesterase 4 OS=Homo sapiens GN=SMPD4 PE=1 SV=2	Sphingomyelin phosphodiesterase 4 OS=Mus musculus GN=Smpd4 PE=1 SV=2	SMPD4	0.59	0.662	0.676	1.886	1.653	1.686	0.637	0.786	0.675	0.994695	1.05733	0.981212	0.954899	0.965146	0.953769	1.00197	0.978216	1.0795	0.593146	0.626103	0.688944	1.97508	1.71269	1.76772	0.63575	0.803504	0.625287	2.64247	0.000546842	2.85899	0.0019964	0.92427	0.478366
F1RK97	137	S	Uncharacterized protein	Mitotic-spindle organizing protein 2A OS=Homo sapiens GN=MZT2A PE=1 SV=2	Mitotic-spindle organizing protein 2 OS=Mus musculus GN=Mzt2 PE=1 SV=1	LOC100153925	0.692			1.555			0.824			1.01608	1.02752	0.957603	1.06858	0.99508	1.09909	0.922546	0.97913	0.940058	0.681048			1.4552			0.89318			1.62924		2.13671		0.762497
F1RKA2	214	S	Uncharacterized protein	THAP domain-containing protein 7 OS=Homo sapiens GN=THAP7 PE=1 SV=2	THAP domain-containing protein 7 OS=Mus musculus GN=Thap7 PE=2 SV=1	THAP7	0.888			1.176			0.967
F1RKB2	75	S	Uncharacterized protein	ATP-dependent RNA helicase DDX54 OS=Homo sapiens GN=DDX54 PE=1 SV=2	ATP-dependent RNA helicase DDX54 OS=Mus musculus GN=Ddx54 PE=1 SV=1	DDX54	0.927	0.922		1.384	1.23		0.756	0.893		1.1816	1.25693		0.612578	0.789832		1.18843	0.949982		0.784527	0.733534		2.2593	1.55729		0.636131	0.940018		2.42147	0.153089	2.51413	0.187088	0.963145	0.880105
F1RKB2	617	S	Uncharacterized protein	ATP-dependent RNA helicase DDX54 OS=Homo sapiens GN=DDX54 PE=1 SV=2	ATP-dependent RNA helicase DDX54 OS=Mus musculus GN=Ddx54 PE=1 SV=1	DDX54	0.672	0.626	0.8	1.878	1.858	1.7	0.569	0.649	0.549	1.1816	1.25693		0.612578	0.789832		1.18843	0.949982		0.568718	0.49804		3.06573	2.3524		0.478781	0.683171		4.66295	0.0856916	5.07906	0.10068	0.918074	0.724397
F1RKB5	356	S	Uncharacterized protein	Nuclear envelope pore membrane protein POM 121C OS=Homo sapiens GN=POM121C PE=1 SV=2	Nuclear envelope pore membrane protein POM 121 OS=Mus musculus GN=Pom121 PE=1 SV=2	LOC100512219	0.593	0.439	0.549	1.832	2.087	1.711	0.68	0.634	0.768	1.01493	1.1136	1.13859	0.843342	0.874964	0.849399	1.12969	1.0062	1.02345	0.584276	0.394218	0.482175	2.17231	2.38524	2.01437	0.601937	0.630091	0.750406	3.31507	0.00161372	4.49925	0.000799899	0.736806	0.0735323
F1RKB5	439	S	Uncharacterized protein	Nuclear envelope pore membrane protein POM 121C OS=Homo sapiens GN=POM121C PE=1 SV=2	Nuclear envelope pore membrane protein POM 121 OS=Mus musculus GN=Pom121 PE=1 SV=2	LOC100512219	0.849			1.332			0.871			1.01493	1.1136	1.13859	0.843342	0.874964	0.849399	1.12969	1.0062	1.02345	0.836509			1.57943			0.771011			2.04852		1.88812		1.08495
F1RKB5	673	S	Uncharacterized protein	Nuclear envelope pore membrane protein POM 121C OS=Homo sapiens GN=POM121C PE=1 SV=2	Nuclear envelope pore membrane protein POM 121 OS=Mus musculus GN=Pom121 PE=1 SV=2	LOC100512219	0.438	0.318		2.191	2.394		0.517	0.493		1.01493	1.1136	1.13859	0.843342	0.874964	0.849399	1.12969	1.0062	1.02345	0.431556	0.285561		2.598	2.73611		0.457649	0.48996		5.62902	0.0145072	7.43826	0.00191838	0.756765	0.350241
F1RKB5	368	S	Uncharacterized protein	Nuclear envelope pore membrane protein POM 121C OS=Homo sapiens GN=POM121C PE=1 SV=2	Nuclear envelope pore membrane protein POM 121 OS=Mus musculus GN=Pom121 PE=1 SV=2	LOC100512219	0.421			2.277			0.459			1.01493	1.1136	1.13859	0.843342	0.874964	0.849399	1.12969	1.0062	1.02345	0.414806			2.69997			0.406308			6.64515		6.509		1.02092
F1RKB5	422	T	Uncharacterized protein	Nuclear envelope pore membrane protein POM 121C OS=Homo sapiens GN=POM121C PE=1 SV=2	Nuclear envelope pore membrane protein POM 121 OS=Mus musculus GN=Pom121 PE=1 SV=2	LOC100512219	0.574			1.867			0.668			1.01493	1.1136	1.13859	0.843342	0.874964	0.849399	1.12969	1.0062	1.02345	0.565555			2.21381			0.591315			3.74388		3.91441		0.956437
F1RKF3	243	S	Uncharacterized protein	Leucine-rich repeat and WD repeat-containing protein 1 OS=Homo sapiens GN=LRWD1 PE=1 SV=2	Leucine-rich repeat and WD repeat-containing protein 1 OS=Mus musculus GN=LRWD1 PE=2 SV=1	---	0.553	0.35	0.48	2.009	2.442	2.046	0.566	0.424	0.52	1.07772	1.06853	1.03142	0.943549	1.05518	0.969828	0.974335	0.888565	0.968997	0.513122	0.327554	0.465377	2.1292	2.31429	2.10965	0.580909	0.477174	0.536637	4.10927	0.000273415	5.01751	4.11068e-05	0.818986	0.223244
F1RKF3	25	S	Uncharacterized protein	Leucine-rich repeat and WD repeat-containing protein 1 OS=Homo sapiens GN=LRWD1 PE=1 SV=2	Leucine-rich repeat and WD repeat-containing protein 1 OS=Mus musculus GN=LRWD1 PE=2 SV=1	---	1.009			0.626			1.325			1.07772	1.06853	1.03142	0.943549	1.05518	0.969828	0.974335	0.888565	0.968997	0.93624			0.663453			1.3599			0.487868		0.708635		0.688461
F1RKF9	340	S	Uncharacterized protein	Homeobox protein cut-like 1 OS=Homo sapiens GN=CUX1 PE=1 SV=3	Homeobox protein cut-like 1 OS=Mus musculus GN=Cux1 PE=1 SV=3	CUX1	0.81	0.729	0.76	1.421	1.565	1.437	0.83	0.796	0.828	0.801221	0.82308	0.796483	1.3951	1.36041	1.41492	0.811028	0.827435	0.798585	1.01096	0.885698	0.954195	1.01856	1.15039	1.0156	1.02339	0.962009	1.03683	1.05371	0.358827	1.11706	0.127221	0.943291	0.265563
F1RKG3	192	T	Uncharacterized protein	Replication factor C subunit 5 OS=Homo sapiens GN=RFC5 PE=1 SV=1	Replication factor C subunit 5 OS=Mus musculus GN=Rfc5 PE=1 SV=1	RFC5	0.918	0.946		1.245	1.202		0.882	0.895		1.04192	1.09556	0.97721	0.892721	0.891656	1.07421	1.03433	1.008	0.956945	0.881063	0.863483		1.39461	1.34805		0.852727	0.887893		1.57568	0.00459358	1.57214	0.0148278	1.00226	0.93233
F1RKG8	153	S	Uncharacterized protein	Phosphatidylethanolamine-binding protein 1 OS=Homo sapiens GN=PEBP1 PE=1 SV=3	Phosphatidylethanolamine-binding protein 1 OS=Mus musculus GN=Pebp1 PE=1 SV=3	PEBP1	0.533			1.684			0.861			0.505933	0.565492	0.618801	1.97003	1.70131	1.72208	0.575906	0.777634	0.608857	1.0535			0.854808			1.49504			0.571764		0.811399		0.704665
F1RKH0	234	S	Uncharacterized protein	Sin3 histone deacetylase corepressor complex component SDS3 OS=Homo sapiens GN=SUDS3 PE=1 SV=2	Sin3 histone deacetylase corepressor complex component SDS3 OS=Mus musculus GN=Suds3 PE=1 SV=1	SUDS3	0.633	0.611	0.662	1.734	1.761	1.671	0.726	0.743	0.702	0.989812	1.03055	1.02427	0.963557	0.910718	1.00069	1.04926	1.05075	0.977171	0.639516	0.592889	0.646313	1.79958	1.93364	1.66985	0.691915	0.707114	0.718401	2.55171	0.00446843	2.87594	0.00294884	0.887263	0.026405
F1RKH0	232	S	Uncharacterized protein	Sin3 histone deacetylase corepressor complex component SDS3 OS=Homo sapiens GN=SUDS3 PE=1 SV=2	Sin3 histone deacetylase corepressor complex component SDS3 OS=Mus musculus GN=Suds3 PE=1 SV=1	SUDS3	0.684	0.626	0.713	1.662	1.721	1.588	0.741	0.763	0.732	0.989812	1.03055	1.02427	0.963557	0.910718	1.00069	1.04926	1.05075	0.977171	0.691041	0.607444	0.696105	1.72486	1.88972	1.58691	0.706211	0.726148	0.749101	2.38441	0.00661044	2.6078	0.00348655	0.914337	0.150124
F1RKH0	235	S	Uncharacterized protein	Sin3 histone deacetylase corepressor complex component SDS3 OS=Homo sapiens GN=SUDS3 PE=1 SV=2	Sin3 histone deacetylase corepressor complex component SDS3 OS=Mus musculus GN=Suds3 PE=1 SV=1	SUDS3	0.62	0.584	0.644	1.776	1.826	1.716	0.703	0.716	0.677	0.989812	1.03055	1.02427	0.963557	0.910718	1.00069	1.04926	1.05075	0.977171	0.626382	0.566689	0.62874	1.84317	2.00501	1.71482	0.669995	0.681418	0.692816	2.72132	0.00487148	3.05356	0.00299629	0.891197	0.0559907
F1RKI0	1287	S	Uncharacterized protein	Rap guanine nucleotide exchange factor 6 OS=Homo sapiens GN=RAPGEF6 PE=1 SV=2	Rap guanine nucleotide exchange factor 2 OS=Mus musculus GN=Rapgef2 PE=1 SV=2	RAPGEF6	0.5	0.445	0.485	2.05	2.205	2.058	0.58	0.53	0.506	1.09387	0.87584	0.961496	0.959457	1.15398	1.05721	0.951268	0.977945	0.978186	0.457094	0.508084	0.504422	2.13663	1.91077	1.94663	0.609712	0.541953	0.517284	3.5915	0.000708385	4.07868	0.00135424	0.880554	0.123387
F1RKI0	1454	S	Uncharacterized protein	Rap guanine nucleotide exchange factor 6 OS=Homo sapiens GN=RAPGEF6 PE=1 SV=2	Rap guanine nucleotide exchange factor 2 OS=Mus musculus GN=Rapgef2 PE=1 SV=2	RAPGEF6	0.629	0.695	0.644	1.755	1.624	1.784	0.711	0.779	0.614	1.09387	0.87584	0.961496	0.959457	1.15398	1.05721	0.951268	0.977945	0.978186	0.575024	0.793524	0.66979	1.82916	1.4073	1.68746	0.747423	0.796569	0.627693	2.26732	0.00945876	2.41565	0.00637139	0.938597	0.612642
F1RKI9	296	T	Uncharacterized protein	26S proteasome non-ATPase regulatory subunit 8 OS=Homo sapiens GN=PSMD8 PE=1 SV=2	26S proteasome non-ATPase regulatory subunit 8 OS=Mus musculus GN=Psmd8 PE=1 SV=2	PSMD8	1.009	1.124	0.925	0.876	0.607	1.04	1.112	1.22	1.044	1.16216	1.12951	1.05837	0.704258	0.6274	0.830099	1.11	1.24186	1.16847	0.868214	0.995119	0.873983	1.24386	0.967484	1.25286	1.0018	0.982401	0.893473	1.20382	0.162069	1.26555	0.106649	0.951226	0.430449
F1RKK2	9	S	Uncharacterized protein	Solute carrier family 12 member 2 OS=Homo sapiens GN=SLC12A2 PE=1 SV=1	Solute carrier family 12 member 2 OS=Mus musculus GN=Slc12a2 PE=1 SV=2	SLC12A2	0.597			1.921			0.6					1.03327			0.8884			1.08072
F1RKM0	391	S	Uncharacterized protein	Lamin-B1 OS=Homo sapiens GN=LMNB1 PE=1 SV=2	Lamin-B1 OS=Mus musculus GN=Lmnb1 PE=1 SV=3	LMNB1	0.643		0.602	1.769		1.778	0.687		0.658	0.932791	0.960171	0.95084	1.11853	1.10522	1.05141	0.914734	0.881781	0.921428	0.689329		0.633124	1.58154		1.69106	0.751038		0.714109	2.23363	0.0232516	2.47464	0.0121297	0.902608	0.187593
F1RKM0	304	S	Uncharacterized protein	Lamin-B1 OS=Homo sapiens GN=LMNB1 PE=1 SV=2	Lamin-B1 OS=Mus musculus GN=Lmnb1 PE=1 SV=3	LMNB1	1.155		1.026	0.818		1.034	1.028		0.958	0.932791	0.960171	0.95084	1.11853	1.10522	1.05141	0.914734	0.881781	0.921428	1.23822		1.07905	0.731315		0.98344	1.12382		1.03969	0.792578	0.305503	0.739991	0.203741	1.07106	0.506535
F1RKM0	534	S	Uncharacterized protein	Lamin-B1 OS=Homo sapiens GN=LMNB1 PE=1 SV=2	Lamin-B1 OS=Mus musculus GN=Lmnb1 PE=1 SV=3	LMNB1	1.18	0.922	1.224	0.335	1.07	0.402	1.416	1.025	1.361	0.932791	0.960171	0.95084	1.11853	1.10522	1.05141	0.914734	0.881781	0.921428	1.26502	0.960246	1.28728	0.2995	0.96813	0.382343	1.54799	1.16242	1.47706	0.394027	0.0364452	0.469737	0.0793277	0.838824	0.230053
F1RKM0	305	S	Uncharacterized protein	Lamin-B1 OS=Homo sapiens GN=LMNB1 PE=1 SV=2	Lamin-B1 OS=Mus musculus GN=Lmnb1 PE=1 SV=3	LMNB1	0.924	1.044		1.1	0.848		1	1.097		0.932791	0.960171	0.95084	1.11853	1.10522	1.05141	0.914734	0.881781	0.921428	0.990576	1.08731		0.983431	0.767266		1.09321	1.24407		0.74903	0.17092	0.842539	0.348398	0.889015	0.304519
F1RKM0	20	T	Uncharacterized protein	Lamin-B1 OS=Homo sapiens GN=LMNB1 PE=1 SV=2	Lamin-B1 OS=Mus musculus GN=Lmnb1 PE=1 SV=3	LMNB1	0.437	0.501	0.54	2.165	1.941	1.762	0.54	0.697	0.729	0.932791	0.960171	0.95084	1.11853	1.10522	1.05141	0.914734	0.881781	0.921428	0.468486	0.521782	0.567919	1.93557	1.75621	1.67584	0.590335	0.790446	0.791164	2.47134	0.000519108	3.44479	0.00136978	0.717416	0.0753404
F1RKM0	308	S	Uncharacterized protein	Lamin-B1 OS=Homo sapiens GN=LMNB1 PE=1 SV=2	Lamin-B1 OS=Mus musculus GN=Lmnb1 PE=1 SV=3	LMNB1	1.101	0.977	1.028	0.816	0.887	0.903	1.08	1.125	1.077	0.932791	0.960171	0.95084	1.11853	1.10522	1.05141	0.914734	0.881781	0.921428	1.18033	1.01753	1.08115	0.729527	0.802553	0.858845	1.18067	1.27583	1.16884	0.659504	0.00128596	0.729162	0.00915905	0.904469	0.125819
F1RKM0	200	S	Uncharacterized protein	Lamin-B1 OS=Homo sapiens GN=LMNB1 PE=1 SV=2	Lamin-B1 OS=Mus musculus GN=Lmnb1 PE=1 SV=3	LMNB1	0.67		0.567	1.733		1.93	0.694		0.549	0.932791	0.960171	0.95084	1.11853	1.10522	1.05141	0.914734	0.881781	0.921428	0.718274		0.596315	1.54935		1.83563	0.75869		0.595815	2.49905	0.04291	2.57493	0.0538466	0.970531	0.863861
F1RKM0	375	S	Uncharacterized protein	Lamin-B1 OS=Homo sapiens GN=LMNB1 PE=1 SV=2	Lamin-B1 OS=Mus musculus GN=Lmnb1 PE=1 SV=3	LMNB1	0.525		0.533	2.108		2.023	0.507		0.493	0.932791	0.960171	0.95084	1.11853	1.10522	1.05141	0.914734	0.881781	0.921428	0.562827		0.560557	1.88461		1.92408	0.554259		0.535039	3.49646	0.00186478	3.39037	0.00912544	1.03129	0.323659
F1RKM0	393	S	Uncharacterized protein	Lamin-B1 OS=Homo sapiens GN=LMNB1 PE=1 SV=2	Lamin-B1 OS=Mus musculus GN=Lmnb1 PE=1 SV=3	LMNB1	0.719		0.626	1.61		1.759	0.754		0.653	0.932791	0.960171	0.95084	1.11853	1.10522	1.05141	0.914734	0.881781	0.921428	0.770805		0.658365	1.43939		1.67299	0.824283		0.708683	2.0303	0.0521337	2.17775	0.0488112	0.932291	0.585806
F1RKM0	278	S	Uncharacterized protein	Lamin-B1 OS=Homo sapiens GN=LMNB1 PE=1 SV=2	Lamin-B1 OS=Mus musculus GN=Lmnb1 PE=1 SV=3	LMNB1	0.853	0.786	0.859	1.309	1.367	1.176	0.886	0.906	0.978	0.932791	0.960171	0.95084	1.11853	1.10522	1.05141	0.914734	0.881781	0.921428	0.91446	0.818604	0.903412	1.17028	1.23685	1.1185	0.968587	1.02747	1.0614	1.15313	0.0254235	1.33725	0.00307331	0.862312	0.0264961
F1RKM0	23	S	Uncharacterized protein	Lamin-B1 OS=Homo sapiens GN=LMNB1 PE=1 SV=2	Lamin-B1 OS=Mus musculus GN=Lmnb1 PE=1 SV=3	LMNB1	0.679	0.697	0.739	1.717	1.516	1.467	0.698	0.867	0.819	0.932791	0.960171	0.95084	1.11853	1.10522	1.05141	0.914734	0.881781	0.921428	0.727923	0.725913	0.777207	1.53505	1.37167	1.39527	0.763063	0.983237	0.888838	1.63255	0.00288784	1.92824	0.00271702	0.846651	0.162168
F1RKM6	966	S	Uncharacterized protein	Zinc finger protein 608 OS=Homo sapiens GN=ZNF608 PE=1 SV=4	Zinc finger protein 608 OS=Mus musculus GN=Znf608 PE=1 SV=1	ZNF608	0.813	0.828	0.79	1.427	1.282	1.365	0.823	0.938	0.867			1.05211			0.897493			1.05448			0.750872			1.5209			0.822205	1.84979		2.02552		0.913241
F1RKM6	629	S	Uncharacterized protein	Zinc finger protein 608 OS=Homo sapiens GN=ZNF608 PE=1 SV=4	Zinc finger protein 608 OS=Mus musculus GN=Znf608 PE=1 SV=1	ZNF608	0.708		0.615	1.705		1.751	0.683		0.671			1.05211			0.897493			1.05448			0.584539			1.95099			0.636332	3.066		3.33765		0.918608
F1RKM6	423	S	Uncharacterized protein	Zinc finger protein 608 OS=Homo sapiens GN=ZNF608 PE=1 SV=4	Zinc finger protein 608 OS=Mus musculus GN=Znf608 PE=1 SV=1	ZNF608	0.832		0.891	1.361		1.186	0.862		0.94			1.05211			0.897493			1.05448			0.846869			1.32146			0.891433	1.4824		1.56041		0.950008
F1RKQ8	182	S	Uncharacterized protein	Cleavage and polyadenylation specificity factor subunit 7 OS=Homo sapiens GN=CPSF7 PE=1 SV=1	Cleavage and polyadenylation specificity factor subunit 7 OS=Mus musculus GN=Cpsf7 PE=1 SV=2	CPSF7			0.696	1.84	1.903	1.876	0.289	0.272	0.481	1.00505	1.0034	1.01104	1.08142	0.997951	0.980952	0.908932	0.95584	0.989212			0.688402	1.70146	1.90691	1.91243	0.317956	0.284567	0.486246	5.07069	0.00010045	2.67325		1.89683
F1RKQ8	185	S	Uncharacterized protein	Cleavage and polyadenylation specificity factor subunit 7 OS=Homo sapiens GN=CPSF7 PE=1 SV=1	Cleavage and polyadenylation specificity factor subunit 7 OS=Mus musculus GN=Cpsf7 PE=1 SV=2	CPSF7	0.524	0.389	0.544	2.204	2.346	2.131	0.427	0.467	0.384	1.00505	1.0034	1.01104	1.08142	0.997951	0.980952	0.908932	0.95584	0.989212	0.521365	0.387681	0.538061	2.03806	2.35082	2.17238	0.469782	0.488576	0.388188	4.87266	0.00111271	4.53405	0.000448139	1.07468	0.59111
F1RKQ8	188	S	Uncharacterized protein	Cleavage and polyadenylation specificity factor subunit 7 OS=Homo sapiens GN=CPSF7 PE=1 SV=1	Cleavage and polyadenylation specificity factor subunit 7 OS=Mus musculus GN=Cpsf7 PE=1 SV=2	CPSF7	0.706	0.505	0.828	1.817	2.099	1.696	0.589	0.563	0.526	1.00505	1.0034	1.01104	1.08142	0.997951	0.980952	0.908932	0.95584	0.989212	0.70245	0.503288	0.81896	1.6802	2.10331	1.72893	0.648013	0.589011	0.531737	3.11655	0.00814964	2.7226	0.0031279	1.1447	0.459264
F1RKR3	287	S	Uncharacterized protein	Myelin regulatory factor OS=Homo sapiens GN=MYRF PE=1 SV=3	Myelin regulatory factor OS=Mus musculus GN=Myrf PE=1 SV=2	MYRF	0.773	0.639	0.863	1.448	1.792	1.331	0.842	0.692	0.832
F1RKS3	255	S	Flap endonuclease 1			FEN1	0.83	0.727	0.962	1.533	1.463	1.297	0.718	0.882	0.773	1.23564			0.570071			1.15621			0.671716			2.68914			0.620994			4.33038		4.00338		1.08168
F1RKS6	62	S	Uncharacterized protein	Guanine nucleotide exchange factor for Rab-3A OS=Homo sapiens GN=RAB3IL1 PE=1 SV=1	Guanine nucleotide exchange factor for Rab-3A OS=Mus musculus GN=Rab3il1 PE=1 SV=1	RAB3IL1	0.986		1	0.788		0.955	1.208		1.054
F1RKU1	628	S	Uncharacterized protein	Long-chain-fatty-acid--CoA ligase ACSBG1 OS=Homo sapiens GN=ACSBG1 PE=2 SV=2	Long-chain-fatty-acid--CoA ligase ACSBG1 OS=Mus musculus GN=Acsbg1 PE=1 SV=1	ACSBG1	0.492	0.465	0.434	2.034	2.129	2.049	0.601	0.575	0.56	1.00307	0.923877	0.906862	1.12826	1.19454	1.15445	0.890039	0.905934	0.931255	0.490495	0.503314	0.478573	1.80278	1.78227	1.77488	0.675251	0.634704	0.601339	2.80434	5.99994e-05	3.64031	4.3645e-08	0.770358	0.013527
F1RKV6	544	S	Uncharacterized protein	Polycomb protein SUZ12 OS=Homo sapiens GN=SUZ12 PE=1 SV=3	Polycomb protein Suz12 OS=Mus musculus GN=Suz12 PE=1 SV=2	SUZ12	0.684	0.689	0.64	1.652	1.629	1.692	0.749	0.78	0.702	0.80722	1.02842	0.717913	1.1644	1.09989	1.62945	1.02584	0.885885	0.630874	0.847352	0.66996	0.891473	1.41875	1.48106	1.03839	0.730132	0.880476	1.11274	1.44609	0.0877705	1.63493	0.0475519	0.884493	0.474774
F1RKX9	107	S	Uncharacterized protein	Crk-like protein OS=Homo sapiens GN=CRKL PE=1 SV=1	Crk-like protein OS=Mus musculus GN=Crkl PE=1 SV=2	CRKL	0.711	0.727	0.729	1.572	1.498	1.507	0.793	0.853	0.791	1.15485	1.1368	1.14536	0.757395	0.755331	0.801748	1.08979	1.09045	1.06469	0.615666	0.639516	0.636479	2.07553	1.98324	1.87964	0.72766	0.782248	0.742936	2.63596	0.00106237	3.13926	0.00149806	0.839677	0.0081963
F1RKZ6	964	S	Uncharacterized protein	Ubiquitin carboxyl-terminal hydrolase 7 OS=Homo sapiens GN=USP7 PE=1 SV=2	Ubiquitin carboxyl-terminal hydrolase 7 OS=Mus musculus GN=Usp7 PE=1 SV=1	USP7	0.83	0.742	0.923	1.33	1.521	1.017	0.889	0.822	1.068	1.20013		1.1317	0.617837		0.702406	1.15761		1.17048	0.691593		0.815585	2.15267		1.44788	0.767963		0.912446	2.14266	0.212368	2.38894	0.197844	0.896911	0.460832
F1RL00	521	S	Uncharacterized protein	Peptidyl-prolyl cis-trans isomerase-like 2 OS=Homo sapiens GN=PPIL2 PE=1 SV=1	Peptidyl-prolyl cis-trans isomerase-like 2 OS=Mus musculus GN=Ppil2 PE=1 SV=2	PPIL2	0.816	0.686	0.798	1.243	1.373	1.25	0.976	0.995	0.965	1.10991	1.09236	1.10248	0.763431	0.869276	0.844894	1.11596	0.988593	1.06689	0.735194	0.627996	0.723824	1.62818	1.57948	1.47948	0.874585	1.00648	0.904501	1.68265	0.000451828	2.24585	0.000144474	0.749224	0.0119888
F1RL26	210	T	Uncharacterized protein	Zinc finger CCCH domain-containing protein 7A OS=Homo sapiens GN=ZC3H7A PE=1 SV=1	Helicase with zinc finger domain 2 OS=Mus musculus GN=Helz2 PE=1 SV=1	ZC3H7A		0.7	0.787		1.488	1.377		0.887	0.86	1.06943	1.09797	1.01115	0.809457	0.875686	0.839063	1.11086	1.01988	1.15001		0.637537	0.778319		1.69924	1.64112		0.869712	0.747821	2.06509	0.0189844	2.35925	0.0238781	0.875318	0.393965
F1RL45	182	S	5'-AMP-activated protein kinase subunit beta-1			PRKAB1	0.795		0.884	1.42		1.258	0.845		0.879
F1RL45	108	S	5'-AMP-activated protein kinase subunit beta-1			PRKAB1	0.665	0.591	0.662	1.71	1.836	1.709	0.718	0.699	0.667
F1RL66	864	S	Uncharacterized protein	Treacle protein OS=Homo sapiens GN=TCOF1 PE=1 SV=3	Treacle protein OS=Mus musculus GN=Tcof1 PE=1 SV=1	TCOF1	0.45	0.683	0.575	2.219	1.758	1.857	0.481	0.68	0.61	0.657582	0.750283	0.717776	1.7092	1.59451	1.57936	0.702603	0.699806	0.681252	0.684325	0.910324	0.801085	1.29827	1.10253	1.17579	0.684597	0.971697	0.89541	1.40165	0.0363926	1.4929	0.0109338	0.938876	0.656626
F1RL66	1288	S	Uncharacterized protein	Treacle protein OS=Homo sapiens GN=TCOF1 PE=1 SV=3	Treacle protein OS=Mus musculus GN=Tcof1 PE=1 SV=1	TCOF1	0.606	0.562	0.548	1.886	1.835	1.837	0.622	0.728	0.652	0.657582	0.750283	0.717776	1.7092	1.59451	1.57936	0.702603	0.699806	0.681252	0.921558	0.749051	0.763469	1.10344	1.15082	1.16313	0.88528	1.04029	0.957061	1.18551	0.0426868	1.40398	0.0190501	0.844395	0.106377
F1RL66	865	S	Uncharacterized protein	Treacle protein OS=Homo sapiens GN=TCOF1 PE=1 SV=3	Treacle protein OS=Mus musculus GN=Tcof1 PE=1 SV=1	TCOF1	0.523	0.489	0.52	2.018	2.142	1.957	0.586	0.542	0.567	0.657582	0.750283	0.717776	1.7092	1.59451	1.57936	0.702603	0.699806	0.681252	0.795338	0.651754	0.72446	1.18067	1.34336	1.23911	0.834042	0.7745	0.832291	1.54174	0.00523049	1.73293	0.00118802	0.889677	0.149937
F1RL66	887	S	Uncharacterized protein	Treacle protein OS=Homo sapiens GN=TCOF1 PE=1 SV=3	Treacle protein OS=Mus musculus GN=Tcof1 PE=1 SV=1	TCOF1	0.536	0.365	0.665	2.058	2.357	1.739	0.54	0.48	0.637	0.657582	0.750283	0.717776	1.7092	1.59451	1.57936	0.702603	0.699806	0.681252	0.815107	0.486483	0.926472	1.20407	1.47819	1.10108	0.768571	0.685904	0.935043	1.58331	0.0328561	1.69804	0.0417243	0.932432	0.744304
F1RL66	311	S	Uncharacterized protein	Treacle protein OS=Homo sapiens GN=TCOF1 PE=1 SV=3	Treacle protein OS=Mus musculus GN=Tcof1 PE=1 SV=1	TCOF1	0.532	0.387	0.386	2.067	2.286	2.319	0.536	0.519	0.353	0.657582	0.750283	0.717776	1.7092	1.59451	1.57936	0.702603	0.699806	0.681252	0.809025	0.515806	0.537772	1.20934	1.43367	1.46831	0.762878	0.741634	0.518164	2.03262	0.00351002	2.2073	0.00410193	0.920861	0.686449
F1RL66	1260	S	Uncharacterized protein	Treacle protein OS=Homo sapiens GN=TCOF1 PE=1 SV=3	Treacle protein OS=Mus musculus GN=Tcof1 PE=1 SV=1	TCOF1	0.504	0.49	0.59	2.122	1.985	1.898	0.515	0.67	0.558	0.657582	0.750283	0.717776	1.7092	1.59451	1.57936	0.702603	0.699806	0.681252	0.766444	0.653087	0.821983	1.24152	1.24489	1.20175	0.732989	0.957408	0.81908	1.46969	0.0226098	1.64539	0.00696328	0.89322	0.341889
F1RL66	1196	S	Uncharacterized protein	Treacle protein OS=Homo sapiens GN=TCOF1 PE=1 SV=3	Treacle protein OS=Mus musculus GN=Tcof1 PE=1 SV=1	TCOF1	0.514	0.47	0.553	1.981	2.134	1.785	0.625	0.566	0.696	0.657582	0.750283	0.717776	1.7092	1.59451	1.57936	0.702603	0.699806	0.681252	0.781652	0.626431	0.770435	1.15902	1.33834	1.1302	0.88955	0.808795	1.02165	1.33367	0.0283037	1.66515	0.00509301	0.800927	0.0891647
F1RL81	173	S	Uncharacterized protein	17-beta-hydroxysteroid dehydrogenase 14 OS=Homo sapiens GN=HSD17B14 PE=1 SV=1	3-hydroxybutyrate dehydrogenase type 2 OS=Mus musculus GN=Bdh2 PE=1 SV=1	HSD17B14	0.902		0.886	1.216		1.179	0.92		0.952	1.17309	1.25592	1.28532	0.518981	0.51603	0.582562	1.30173	1.2096	1.2045	0.768913		0.689323	2.34305		2.02382	0.706751		0.790372	2.91684	0.0559542	2.99463	0.0562821	0.974025	0.768356
F1RL82	571	S	Uncharacterized protein	Pleckstrin homology domain-containing family A member 4 OS=Homo sapiens GN=PLEKHA4 PE=1 SV=2	Pleckstrin homology domain-containing family A member 4 OS=Mus musculus GN=Plekha4 PE=2 SV=1	PLEKHA4	0.459		0.51	2.272		2.021	0.429		0.516
F1RL82	296	T	Uncharacterized protein	Pleckstrin homology domain-containing family A member 4 OS=Homo sapiens GN=PLEKHA4 PE=1 SV=2	Pleckstrin homology domain-containing family A member 4 OS=Mus musculus GN=Plekha4 PE=2 SV=1	PLEKHA4	0.816		0.838	1.593		1.544	0.679		0.659
F1RL82	241	S	Uncharacterized protein	Pleckstrin homology domain-containing family A member 4 OS=Homo sapiens GN=PLEKHA4 PE=1 SV=2	Pleckstrin homology domain-containing family A member 4 OS=Mus musculus GN=Plekha4 PE=2 SV=1	PLEKHA4		0.8			1.029			1.173
F1RL99	27	S	DNA ligase			LIG1	0.231	0.248	0.213	2.69	2.701	2.669	0.282	0.306	0.189	1.09416	1.01299	1.01483	1.01587	1.01603	1.12606	0.904765	0.911512	0.829148	0.211121	0.24482	0.209888	2.64797	2.65838	2.37022	0.311683	0.335706	0.227945	8.76987	0.000621845	11.5293	0.00142125	0.760657	0.155682
F1RL99	60	S	DNA ligase			LIG1	0.553	0.497	0.537	1.827	2.053	1.89	0.721	0.608	0.614	1.09416	1.01299	1.01483	1.01587	1.01603	1.12606	0.904765	0.911512	0.829148	0.505412	0.490627	0.529153	1.79845	2.0206	1.67843	0.796892	0.667024	0.740519	2.49383	0.00385503	3.60445	0.0052238	0.691874	0.0195025
F1RL99	177	T	DNA ligase			LIG1	0.524		0.606	1.901		1.744	0.685		0.684	1.09416	1.01299	1.01483	1.01587	1.01603	1.12606	0.904765	0.911512	0.829148	0.478907		0.597145	1.8713		1.54877	0.757103		0.824943	2.1618	0.0987627	3.17834	0.0597223	0.680165	0.091591
F1RL99	45	S	DNA ligase			LIG1	0.378	0.542	0.518	2.263	1.966	1.977	0.51	0.638	0.55	1.09416	1.01299	1.01483	1.01587	1.01603	1.12606	0.904765	0.911512	0.829148	0.345471	0.53505	0.510431	2.22764	1.93498	1.75569	0.563682	0.699936	0.663331	3.07133	0.00668399	4.25486	0.00311696	0.721841	0.0766409
F1RL99	909	S	DNA ligase			LIG1	0.644	0.608	0.696	1.785	1.86	1.636	0.672	0.664	0.703	1.09416	1.01299	1.01483	1.01587	1.01603	1.12606	0.904765	0.911512	0.829148	0.588581	0.600204	0.68583	1.75711	1.83065	1.45286	0.742734	0.72846	0.847858	2.17357	0.0100412	2.68888	0.00827916	0.808354	0.04004
F1RLA7	287	S	Uncharacterized protein	Actin-binding LIM protein 3 OS=Homo sapiens GN=ABLIM3 PE=1 SV=3	Actin-binding LIM protein 3 OS=Mus musculus GN=Ablim3 PE=1 SV=2	ABLIM3	0.73			1.467			0.864
F1RLG3	827	S	Uncharacterized protein	Adenomatous polyposis coli protein OS=Homo sapiens GN=APC PE=1 SV=2	Adenomatous polyposis coli protein OS=Mus musculus GN=Apc PE=1 SV=1	APC	0.477	0.349	0.515	2.083	2.445	1.979	0.573	0.423	0.551	1.01291			0.924972			1.05684			0.470918			2.25196			0.542182			4.15352		4.78206		0.868562
F1RLH9	25	S	Uncharacterized protein	Colorectal mutant cancer protein OS=Homo sapiens GN=MCC PE=1 SV=2	Usher syndrome type-1C protein-binding protein 1 OS=Mus musculus GN=Ushbp1 PE=1 SV=2	LOC100515712	0.741			1.567			0.77
F1RLI6	45	T	Solute carrier family 25, member 46			SLC25A46	0.619			1.833			0.655			0.94262	0.969663	1.01881	0.921021	1.04001	0.909539	1.12473	0.992503	1.07287	0.656681			1.99018			0.582362			3.41743		3.03067		1.12762
F1RLJ4	78	T	Uncharacterized protein	Secretory carrier-associated membrane protein 3 OS=Homo sapiens GN=SCAMP3 PE=1 SV=3	Secretory carrier-associated membrane protein 3 OS=Mus musculus GN=Scamp3 PE=1 SV=3	SCAMP3	0.363		0.487	2.378		2.003	0.425		0.555	0.908084	0.907016	0.97226	1.1481	1.19507	1.00269	0.897844	0.933534	0.972279	0.399743		0.500895	2.07125		1.99762	0.473356		0.570824	3.89672	0.0023297	4.51777	0.00244107	0.862531	0.414448
F1RLJ5	50	S	Uncharacterized protein	Dual specificity protein kinase CLK2 OS=Homo sapiens GN=CLK2 PE=1 SV=1	Dual specificity protein kinase CLK2 OS=Mus musculus GN=Clk2 PE=1 SV=2	CLK2	0.745			1.613			0.727
F1RLJ5	142	S	Uncharacterized protein	Dual specificity protein kinase CLK2 OS=Homo sapiens GN=CLK2 PE=1 SV=1	Dual specificity protein kinase CLK2 OS=Mus musculus GN=Clk2 PE=1 SV=2	CLK2	0.815			1.508			0.752
F1RLJ5	17	S	Uncharacterized protein	Dual specificity protein kinase CLK2 OS=Homo sapiens GN=CLK2 PE=1 SV=1	Dual specificity protein kinase CLK2 OS=Mus musculus GN=Clk2 PE=1 SV=2	CLK2	0.769			1.403			0.884
F1RLP5	619	S	Rho guanine nucleotide exchange factor 2			ARHGEF2	0.677		0.698	1.621		1.534	0.783		0.795	1.27127	1.11759	1.07009	0.615372	0.760064	0.871686	1.11327	1.08047	1.04186	0.532539		0.652284	2.63418		1.75981	0.703332		0.763059	2.99646	0.183332	3.70856	0.16371	0.807986	0.214166
F1RLP5	931	S	Rho guanine nucleotide exchange factor 2			ARHGEF2	0.778	0.617	0.796	1.499	1.898	1.48	0.794	0.624	0.755	1.27127	1.11759	1.07009	0.615372	0.760064	0.871686	1.11327	1.08047	1.04186	0.611988	0.552079	0.743865	2.43593	2.49716	1.69786	0.713212	0.577525	0.724666	3.29013	0.023659	3.47546	0.0214245	0.946675	0.653409
F1RLR0	42	S	Uncharacterized protein	Sorting nexin-29 OS=Homo sapiens GN=SNX29 PE=1 SV=3	Sorting nexin-29 OS=Mus musculus GN=Snx29 PE=1 SV=2	LOC100626399	0.698			1.694			0.701				1.07624			0.866717			1.04769
F1RLR7	282	S	Uncharacterized protein	Poly(A)-specific ribonuclease PARN OS=Homo sapiens GN=PARN PE=1 SV=1	Poly(A)-specific ribonuclease PARN OS=Mus musculus GN=Parn PE=1 SV=1	---	0.727	0.689	0.82	1.595	1.656	1.36	0.759	0.758	0.846	0.930141			1.00297			1.06116			0.781602			1.59028			0.715256			2.22337		2.03464		1.09276
F1RLR7	331	S	Uncharacterized protein	Poly(A)-specific ribonuclease PARN OS=Homo sapiens GN=PARN PE=1 SV=1	Poly(A)-specific ribonuclease PARN OS=Mus musculus GN=Parn PE=1 SV=1	---	0.452	0.596	0.659	2.177	1.833	1.673	0.516	0.698	0.702	0.930141			1.00297			1.06116			0.485948			2.17055			0.486261			4.46377		4.46664		0.999356
F1RLS1	385	S	Uncharacterized protein	Cytospin-A OS=Homo sapiens GN=SPECC1L PE=1 SV=2	Cytospin-A OS=Mus musculus GN=Specc1l PE=1 SV=1	SPECC1L	0.696			1.551			0.825			0.604101	0.545982		1.68695	1.78685		0.733444	0.722021		1.15213			0.91941			1.12483			0.817377		0.798012		1.02427
F1RLS1	489	Y	Uncharacterized protein	Cytospin-A OS=Homo sapiens GN=SPECC1L PE=1 SV=2	Cytospin-A OS=Mus musculus GN=Specc1l PE=1 SV=1	SPECC1L	0.828			0.766			1.372			0.604101	0.545982		1.68695	1.78685		0.733444	0.722021		1.37063			0.454074			1.87063			0.242739		0.331288		0.732712
F1RLT7	757	T	Transmembrane channel-like protein			TMC5	1.245			0.512			1.205
F1RLV3	399	S	Uncharacterized protein	Protein PRR14L OS=Homo sapiens GN=PRR14L PE=1 SV=1	Proline-rich protein 14 OS=Mus musculus GN=Prr14 PE=2 SV=1	PRR14L	0.637	0.561	0.575	1.777	1.837	1.873	0.686	0.728	0.594
F1RLV6	545	S	Uncharacterized protein	Eukaryotic translation initiation factor 4E transporter OS=Homo sapiens GN=EIF4ENIF1 PE=1 SV=2	Eukaryotic translation initiation factor 4E transporter OS=Mus musculus GN=Eif4enif1 PE=1 SV=2	EIF4ENIF1	0.741	0.756	0.721	1.474	1.452	1.442	0.85	0.864	0.858			0.904047			0.996723			1.09081			0.797525			1.44674			0.786571	1.8393		1.81404		1.01393
F1RLV6	920	S	Uncharacterized protein	Eukaryotic translation initiation factor 4E transporter OS=Homo sapiens GN=EIF4ENIF1 PE=1 SV=2	Eukaryotic translation initiation factor 4E transporter OS=Mus musculus GN=Eif4enif1 PE=1 SV=2	EIF4ENIF1	0.79	0.76	0.841	1.416	1.487	1.354	0.854	0.832	0.831			0.904047			0.996723			1.09081			0.930261			1.35845			0.761819	1.78317		1.46029		1.22111
F1RLV6	532	S	Uncharacterized protein	Eukaryotic translation initiation factor 4E transporter OS=Homo sapiens GN=EIF4ENIF1 PE=1 SV=2	Eukaryotic translation initiation factor 4E transporter OS=Mus musculus GN=Eif4enif1 PE=1 SV=2	EIF4ENIF1	0.997	0.909	1.037	1.215	1.185	1.04	0.835	0.943	0.942			0.904047			0.996723			1.09081			1.14706			1.04342			0.863578	1.20825		0.909644		1.32827
F1RLV6	555	S	Uncharacterized protein	Eukaryotic translation initiation factor 4E transporter OS=Homo sapiens GN=EIF4ENIF1 PE=1 SV=2	Eukaryotic translation initiation factor 4E transporter OS=Mus musculus GN=Eif4enif1 PE=1 SV=2	EIF4ENIF1	0.73	0.732	0.832	1.516	1.541	1.396	0.823	0.813	0.8			0.904047			0.996723			1.09081			0.920306			1.40059			0.733399	1.90972		1.52187		1.25485
F1RLZ0	314	S	Uncharacterized protein	C5a anaphylatoxin chemotactic receptor 2 OS=Homo sapiens GN=C5AR2 PE=1 SV=1	C5a anaphylatoxin chemotactic receptor 2 OS=Mus musculus GN=C5ar2 PE=1 SV=1	C5AR2	0.566	0.51	0.807	1.789	1.968	1.112	0.743	0.667	1.086
F1RLZ0	316	S	Uncharacterized protein	C5a anaphylatoxin chemotactic receptor 2 OS=Homo sapiens GN=C5AR2 PE=1 SV=1	C5a anaphylatoxin chemotactic receptor 2 OS=Mus musculus GN=C5ar2 PE=1 SV=1	C5AR2	0.619			1.654			0.807
F1RM04	90	S	Uncharacterized protein	Zinc finger CCCH domain-containing protein 4 OS=Homo sapiens GN=ZC3H4 PE=1 SV=3	Zinc finger CCCH domain-containing protein 4 OS=Mus musculus GN=Zc3h4 PE=1 SV=2	---	0.525	0.474	0.533	2.118	2.2	2.057	0.5	0.507	0.462
F1RM04	118	S	Uncharacterized protein	Zinc finger CCCH domain-containing protein 4 OS=Homo sapiens GN=ZC3H4 PE=1 SV=3	Zinc finger CCCH domain-containing protein 4 OS=Mus musculus GN=Zc3h4 PE=1 SV=2	---	0.533			2.023			0.572
F1RM07	1105	Y	Uncharacterized protein	Rho GTPase-activating protein 35 OS=Homo sapiens GN=ARHGAP35 PE=1 SV=3	Rho GTPase-activating protein 35 OS=Mus musculus GN=Arhgap35 PE=1 SV=3	ARHGAP35	0.809	0.764	0.825	1.36	1.437	1.215	0.882	0.868	0.974	1.15169	1.11021	1.16711	0.672831	0.784506	0.69588	1.16066	1.12465	1.14866	0.702447	0.688159	0.706875	2.02131	1.83173	1.74599	0.759914	0.771793	0.847942	2.35288	0.00278341	2.6694	0.00466028	0.881424	0.0707853
F1RM07	1179	S	Uncharacterized protein	Rho GTPase-activating protein 35 OS=Homo sapiens GN=ARHGAP35 PE=1 SV=3	Rho GTPase-activating protein 35 OS=Mus musculus GN=Arhgap35 PE=1 SV=3	ARHGAP35	0.796	0.832	0.854	1.448	1.301	1.319	0.821	0.918	0.851	1.15169	1.11021	1.16711	0.672831	0.784506	0.69588	1.16066	1.12465	1.14866	0.691159	0.749409	0.731723	2.1521	1.65837	1.89544	0.707358	0.816251	0.740861	2.51975	0.0119125	2.62668	0.013346	0.959293	0.46089
F1RM07	974	S	Uncharacterized protein	Rho GTPase-activating protein 35 OS=Homo sapiens GN=ARHGAP35 PE=1 SV=3	Rho GTPase-activating protein 35 OS=Mus musculus GN=Arhgap35 PE=1 SV=3	ARHGAP35	0.694	0.76	0.774	1.63	1.548	1.483	0.76	0.782	0.773	1.15169	1.11021	1.16711	0.672831	0.784506	0.69588	1.16066	1.12465	1.14866	0.602594	0.684556	0.663178	2.4226	1.97322	2.13111	0.654802	0.695325	0.672956	3.22623	0.00723743	3.34658	0.00595435	0.964037	0.441056
F1RM10	561	T	Uncharacterized protein	Transcription elongation regulator 1 OS=Homo sapiens GN=TCERG1 PE=1 SV=2	Transcription elongation regulator 1 OS=Mus musculus GN=Tcerg1 PE=1 SV=2	TCERG1										1.10452	1.14839	1.10853	0.772118	0.764627	0.810156	1.08739	1.05013	1.05674
F1RM12	118	Y	Uncharacterized protein	RNA-binding protein 27 OS=Homo sapiens GN=RBM27 PE=1 SV=2	RNA-binding protein 27 OS=Mus musculus GN=Rbm27 PE=1 SV=3	LOC100511626	0.52	0.372		2.15	2.263		0.477	0.55		0.947609			0.909835			1.1304			0.54875			2.36306			0.421973			5.60003		4.30627		1.30044
F1RM23	452	T	Uncharacterized protein	Coiled-coil domain-containing protein 61 OS=Homo sapiens GN=CCDC61 PE=1 SV=3	Coiled-coil domain-containing protein 61 OS=Mus musculus GN=Ccdc61 PE=1 SV=1	CCDC61	0.686		0.458	1.923		2.171	0.517		0.426	0.894825			1.10351			0.893636			0.76663			1.74262			0.578536			3.01212		2.27309		1.32512
F1RM23	382	S	Uncharacterized protein	Coiled-coil domain-containing protein 61 OS=Homo sapiens GN=CCDC61 PE=1 SV=3	Coiled-coil domain-containing protein 61 OS=Mus musculus GN=Ccdc61 PE=1 SV=1	CCDC61	0.544	0.923	0.648	2.142	1.231	1.764	0.461	0.892	0.628	0.894825			1.10351			0.893636			0.60794			1.94107			0.51587			3.76272		3.19287		1.17847
F1RM23	285	T	Uncharacterized protein	Coiled-coil domain-containing protein 61 OS=Homo sapiens GN=CCDC61 PE=1 SV=3	Coiled-coil domain-containing protein 61 OS=Mus musculus GN=Ccdc61 PE=1 SV=1	CCDC61	0.724	0.752	0.487	1.485	1.522	2.011	0.855	0.81	0.548	0.894825			1.10351			0.893636			0.809097			1.3457			0.956766			1.40651		1.66322		0.845658
F1RM23	336	S	Uncharacterized protein	Coiled-coil domain-containing protein 61 OS=Homo sapiens GN=CCDC61 PE=1 SV=3	Coiled-coil domain-containing protein 61 OS=Mus musculus GN=Ccdc61 PE=1 SV=1	CCDC61	0.499		0.566	2.071		1.931	0.563		0.549	0.894825			1.10351			0.893636			0.557651			1.87673			0.630011			2.97889		3.36543		0.885145
F1RM42	384	S	Uncharacterized protein	Interferon regulatory factor 2-binding protein 1 OS=Homo sapiens GN=IRF2BP1 PE=1 SV=1	Interferon regulatory factor 2-binding protein 1 OS=Mus musculus GN=Irf2bp1 PE=1 SV=2	IRF2BP1	0.688	0.57	0.608	1.686	1.844	1.778	0.717	0.715	0.653	1.10351	1.13371	1.05945	0.816934	0.765933	0.882496	1.07005	1.08132	1.09654	0.623466	0.502776	0.573881	2.06381	2.40752	2.01474	0.670063	0.661229	0.59551	3.36624	0.00520498	3.81506	0.0035796	0.882355	0.157957
F1RM42	130	Y	Uncharacterized protein	Interferon regulatory factor 2-binding protein 1 OS=Homo sapiens GN=IRF2BP1 PE=1 SV=1	Interferon regulatory factor 2-binding protein 1 OS=Mus musculus GN=Irf2bp1 PE=1 SV=2	IRF2BP1	0.605			1.75			0.739			1.10351	1.13371	1.05945	0.816934	0.765933	0.882496	1.07005	1.08132	1.09654	0.548252			2.14216			0.690623			3.10177		3.90725		0.793851
F1RM42	436	S	Uncharacterized protein	Interferon regulatory factor 2-binding protein 1 OS=Homo sapiens GN=IRF2BP1 PE=1 SV=1	Interferon regulatory factor 2-binding protein 1 OS=Mus musculus GN=Irf2bp1 PE=1 SV=2	IRF2BP1	0.421	0.342	0.443	2.198	2.378	2.108	0.526	0.484	0.498	1.10351	1.13371	1.05945	0.816934	0.765933	0.882496	1.07005	1.08132	1.09654	0.381511	0.301665	0.41814	2.69055	3.10471	2.38868	0.491567	0.447601	0.454156	5.87368	0.00808883	7.43105	0.00646889	0.790424	0.0902593
F1RM42	453	S	Uncharacterized protein	Interferon regulatory factor 2-binding protein 1 OS=Homo sapiens GN=IRF2BP1 PE=1 SV=1	Interferon regulatory factor 2-binding protein 1 OS=Mus musculus GN=Irf2bp1 PE=1 SV=2	IRF2BP1	0.72	0.647	0.607	1.569	1.532	1.603	0.787	0.899	0.814	1.10351	1.13371	1.05945	0.816934	0.765933	0.882496	1.07005	1.08132	1.09654	0.652465	0.570694	0.572937	1.9206	2.00017	1.81644	0.735481	0.831391	0.742336	2.48449	0.000223301	3.19427	0.000223522	0.777798	0.01452
F1RM42	324	S	Uncharacterized protein	Interferon regulatory factor 2-binding protein 1 OS=Homo sapiens GN=IRF2BP1 PE=1 SV=1	Interferon regulatory factor 2-binding protein 1 OS=Mus musculus GN=Irf2bp1 PE=1 SV=2	IRF2BP1	0.968	0.898	0.968	0.934	1.134	1	1.1	0.996	1.042	1.10351	1.13371	1.05945	0.816934	0.765933	0.882496	1.07005	1.08132	1.09654	0.877203	0.792092	0.913678	1.1433	1.48055	1.13315	1.02799	0.921096	0.950262	1.29581	0.120373	1.45452	0.0643346	0.89088	0.0945114
F1RM42	186	S	Uncharacterized protein	Interferon regulatory factor 2-binding protein 1 OS=Homo sapiens GN=IRF2BP1 PE=1 SV=1	Interferon regulatory factor 2-binding protein 1 OS=Mus musculus GN=Irf2bp1 PE=1 SV=2	IRF2BP1	0.631	0.587		1.787	1.772		0.685	0.756		1.10351	1.13371	1.05945	0.816934	0.765933	0.882496	1.07005	1.08132	1.09654	0.571813	0.517771		2.18745	2.31352		0.640158	0.699145		3.36068	0.00866805	4.1309	0.00907903	0.813545	0.0899828
F1RM42	125	S	Uncharacterized protein	Interferon regulatory factor 2-binding protein 1 OS=Homo sapiens GN=IRF2BP1 PE=1 SV=1	Interferon regulatory factor 2-binding protein 1 OS=Mus musculus GN=Irf2bp1 PE=1 SV=2	IRF2BP1	0.738	0.428	0.609	1.485	2.25	1.769	0.843	0.508	0.659	1.10351	1.13371	1.05945	0.816934	0.765933	0.882496	1.07005	1.08132	1.09654	0.668776	0.377523	0.574825	1.81777	2.93759	2.00454	0.787815	0.469796	0.600982	3.63711	0.0348429	4.16989	0.0323207	0.872232	0.564154
F1RM42	66	S	Uncharacterized protein	Interferon regulatory factor 2-binding protein 1 OS=Homo sapiens GN=IRF2BP1 PE=1 SV=1	Interferon regulatory factor 2-binding protein 1 OS=Mus musculus GN=Irf2bp1 PE=1 SV=2	IRF2BP1	0.566	0.507	0.524	2.002	2.055	1.903	0.56	0.599	0.612	1.10351	1.13371	1.05945	0.816934	0.765933	0.882496	1.07005	1.08132	1.09654	0.51291	0.447206	0.494595	2.45063	2.683	2.15638	0.523341	0.553953	0.55812	4.4576	0.00625807	5.01132	0.005457	0.889506	0.0711252
F1RM56	132	S	Uncharacterized protein	RNA-binding protein 42 OS=Homo sapiens GN=RBM42 PE=1 SV=1	RNA-binding protein 42 OS=Mus musculus GN=Rbm42 PE=1 SV=1	RBM42										0.873645	1.06993	1.16489	1.11539	0.932984	0.801222	1.04189	0.999551	0.982717
F1RM66	826	S	Uncharacterized protein	Histone-lysine N-methyltransferase 2B OS=Homo sapiens GN=KMT2B PE=1 SV=1	Histone-lysine N-methyltransferase 2B OS=Mus musculus GN=Kmt2b PE=1 SV=3	KMT2B	0.708	0.637	0.699	1.582	1.721	1.573	0.787	0.752	0.757	1.12832	1.21204	1.05667	0.856294	0.800967	0.595858	1.01416	0.981282	1.35055	0.627483	0.525561	0.661515	1.8475	2.14865	2.63989	0.776011	0.766345	0.560511	3.15571	0.0159984	3.65711	0.0175698	0.862898	0.317148
F1RM66	2091	T	Uncharacterized protein	Histone-lysine N-methyltransferase 2B OS=Homo sapiens GN=KMT2B PE=1 SV=1	Histone-lysine N-methyltransferase 2B OS=Mus musculus GN=Kmt2b PE=1 SV=3	KMT2B	0.781	0.551	0.69	1.539	1.791	1.571	0.757	0.775	0.77	1.12832	1.21204	1.05667	0.856294	0.800967	0.595858	1.01416	0.981282	1.35055	0.692181	0.454606	0.652997	1.79728	2.23605	2.63654	0.74643	0.789783	0.570137	3.16655	0.0185047	3.70592	0.0152014	0.854457	0.363301
F1RM66	2356	S	Uncharacterized protein	Histone-lysine N-methyltransferase 2B OS=Homo sapiens GN=KMT2B PE=1 SV=1	Histone-lysine N-methyltransferase 2B OS=Mus musculus GN=Kmt2b PE=1 SV=3	KMT2B	0.607	0.542	0.573	1.877	2.023	1.913	0.629	0.59	0.559	1.12832	1.21204	1.05667	0.856294	0.800967	0.595858	1.01416	0.981282	1.35055	0.537969	0.447181	0.542272	2.192	2.5257	3.2105	0.620217	0.601254	0.413905	4.84794	0.0162339	5.19058	0.0183042	0.933988	0.656612
F1RM66	862	S	Uncharacterized protein	Histone-lysine N-methyltransferase 2B OS=Homo sapiens GN=KMT2B PE=1 SV=1	Histone-lysine N-methyltransferase 2B OS=Mus musculus GN=Kmt2b PE=1 SV=3	KMT2B	0.585		0.607	1.936		1.872	0.6		0.566	1.12832	1.21204	1.05667	0.856294	0.800967	0.595858	1.01416	0.981282	1.35055	0.518471		0.574448	2.2609		3.14169	0.591622		0.419088	5.34535	0.115277	4.94327	0.127127	1.08134	0.71831
F1RM66	1042	S	Uncharacterized protein	Histone-lysine N-methyltransferase 2B OS=Homo sapiens GN=KMT2B PE=1 SV=1	Histone-lysine N-methyltransferase 2B OS=Mus musculus GN=Kmt2b PE=1 SV=3	KMT2B	1.126	0.756		1.184	1.449		0.743	0.868		1.12832	1.21204	1.05667	0.856294	0.800967	0.595858	1.01416	0.981282	1.35055	0.997947	0.623743		1.3827	1.80906		0.732625	0.884557		1.97366	0.137405	1.96817	0.111525	1.00279	0.99254
F1RM66	1039	S	Uncharacterized protein	Histone-lysine N-methyltransferase 2B OS=Homo sapiens GN=KMT2B PE=1 SV=1	Histone-lysine N-methyltransferase 2B OS=Mus musculus GN=Kmt2b PE=1 SV=3	KMT2B		0.922			1.184			0.931		1.12832	1.21204	1.05667	0.856294	0.800967	0.595858	1.01416	0.981282	1.35055		0.760702			1.47821			0.948759		1.55805		1.94322		0.801786
F1RM66	866	S	Uncharacterized protein	Histone-lysine N-methyltransferase 2B OS=Homo sapiens GN=KMT2B PE=1 SV=1	Histone-lysine N-methyltransferase 2B OS=Mus musculus GN=Kmt2b PE=1 SV=3	KMT2B	0.575	0.611	0.733	1.83	1.908	1.435	0.698	0.623	0.854	1.12832	1.21204	1.05667	0.856294	0.800967	0.595858	1.01416	0.981282	1.35055	0.509609	0.50411	0.693692	2.13712	2.38212	2.40829	0.688253	0.634884	0.632334	3.54264	0.00189061	4.05733	0.000154746	0.873145	0.314546
F1RMA3	35	T	Uncharacterized protein	Cell cycle and apoptosis regulator protein 2 OS=Homo sapiens GN=CCAR2 PE=1 SV=2	Cell cycle and apoptosis regulator protein 2 OS=Mus musculus GN=Ccar2 PE=1 SV=2	CCAR2	0.733			1.522			0.815			1.16186	1.19675	1.15405	0.694609	0.651388	0.701558	1.13492	1.14033	1.14722	0.630883			2.19116			0.71811			3.05129		3.47316		0.878534
F1RMA3	672	S	Uncharacterized protein	Cell cycle and apoptosis regulator protein 2 OS=Homo sapiens GN=CCAR2 PE=1 SV=2	Cell cycle and apoptosis regulator protein 2 OS=Mus musculus GN=Ccar2 PE=1 SV=2	CCAR2	0.7	0.653	0.653	1.654	1.68	1.756	0.734	0.772	0.631	1.16186	1.19675	1.15405	0.694609	0.651388	0.701558	1.13492	1.14033	1.14722	0.602481	0.545643	0.565833	2.3812	2.57911	2.503	0.646739	0.676995	0.550024	3.98307	3.67437e-05	4.35443	0.000392274	0.914717	0.299755
F1RMA3	916	S	Uncharacterized protein	Cell cycle and apoptosis regulator protein 2 OS=Homo sapiens GN=CCAR2 PE=1 SV=2	Cell cycle and apoptosis regulator protein 2 OS=Mus musculus GN=Ccar2 PE=1 SV=2	CCAR2										1.16186	1.19675	1.15405	0.694609	0.651388	0.701558	1.13492	1.14033	1.14722
F1RMA3	235	S	Uncharacterized protein	Cell cycle and apoptosis regulator protein 2 OS=Homo sapiens GN=CCAR2 PE=1 SV=2	Cell cycle and apoptosis regulator protein 2 OS=Mus musculus GN=Ccar2 PE=1 SV=2	CCAR2	0.839	0.842		1.263	1.182		0.939	1.008		1.16186	1.19675	1.15405	0.694609	0.651388	0.701558	1.13492	1.14033	1.14722	0.722116	0.703571		1.81829	1.81459		0.827368	0.883952		2.12285	0.0182531	2.54816	0.0037997	0.833092	0.0983914
F1RMA6	592	S	Uncharacterized protein	Vinexin OS=Homo sapiens GN=SORBS3 PE=1 SV=2	Vinexin OS=Mus musculus GN=Sorbs3 PE=1 SV=1	SORBS3	0.766	0.747	0.682	1.417	1.574	1.697	0.876	0.773	0.66	1.07367	1.13223	1.10667	0.888364	0.688701	0.744865	1.05985	1.15339	1.15662	0.713442	0.659759	0.616264	1.59507	2.28546	2.27827	0.826529	0.670201	0.570629	2.97906	0.0190084	3.09571	0.0246462	0.962322	0.769102
F1RMC1	372	S	Uncharacterized protein	Dematin OS=Homo sapiens GN=DMTN PE=1 SV=3	Dematin OS=Mus musculus GN=Dmtn PE=1 SV=1	DMTN
F1RMD6	123	S	Uncharacterized protein	Vacuolar protein-sorting-associated protein 36 OS=Homo sapiens GN=VPS36 PE=1 SV=1	Vacuolar protein-sorting-associated protein 36 OS=Mus musculus GN=Vps36 PE=1 SV=1	VPS36										1.14669	1.17643	1.15549	0.706279	0.678468	0.77145	1.11021	1.09874	1.08561
F1RME6	225	S	Forkhead box protein O1			FOXO1	0.924			1.119			0.983			0.902838	0.975231	0.990061	0.990472	1.05036	0.920681	1.03971	0.933733	1.0239	1.02344			1.12976			0.945457			1.19494		1.10389		1.08248
F1RME6	310	S	Forkhead box protein O1			FOXO1	0.72			1.484			0.86			0.902838	0.975231	0.990061	0.990472	1.05036	0.920681	1.03971	0.933733	1.0239	0.797485			1.49828			0.827154			1.81136		1.87875		0.964131
F1RME6	283	S	Forkhead box protein O1			FOXO1	0.645			1.627			0.806			0.902838	0.975231	0.990061	0.990472	1.05036	0.920681	1.03971	0.933733	1.0239	0.714414			1.64265			0.775217			2.11896		2.2993		0.921567
F1RME6	305	S	Forkhead box protein O1			FOXO1	0.577	0.522		1.855	1.939		0.675	0.68		0.902838	0.975231	0.990061	0.990472	1.05036	0.920681	1.03971	0.933733	1.0239	0.639096	0.535258		1.87284	1.84604		0.64922	0.72826		2.69977	0.0112971	3.16675	0.0181734	0.852538	0.268334
F1RME6	336	S	Forkhead box protein O1			FOXO1	0.587	0.555		1.878	1.918		0.646	0.666		0.902838	0.975231	0.990061	0.990472	1.05036	0.920681	1.03971	0.933733	1.0239	0.650172	0.569096		1.89607	1.82605		0.621328	0.713266		2.78895	0.00320493	3.05274	0.00202738	0.913587	0.447443
F1RME6	294	S	Forkhead box protein O1			FOXO1	0.851	0.729		1.328	1.511		0.873	0.841		0.902838	0.975231	0.990061	0.990472	1.05036	0.920681	1.03971	0.933733	1.0239	0.942584	0.747515		1.34077	1.43856		0.839658	0.900686		1.597	0.0204052	1.64448	0.0676989	0.971129	0.841275
F1RME6	439	S	Forkhead box protein O1			FOXO1	0.594	0.538		1.881	1.921		0.637	0.68		0.902838	0.975231	0.990061	0.990472	1.05036	0.920681	1.03971	0.933733	1.0239	0.657926	0.551664		1.89909	1.8289		0.612671	0.72826		2.78015	0.0071132	3.08203	0.00480817	0.902052	0.491425
F1RME6	477	S	Forkhead box protein O1			FOXO1	0.646	0.668		1.758	1.677		0.694	0.761		0.902838	0.975231	0.990061	0.990472	1.05036	0.920681	1.03971	0.933733	1.0239	0.715522	0.684966		1.77491	1.5966		0.667494	0.815008		2.2742	0.0162296	2.40738	0.0512662	0.944678	0.676742
F1RME6	171	S	Forkhead box protein O1			FOXO1	0.499	0.519		2.104	1.917		0.535	0.7		0.902838	0.975231	0.990061	0.990472	1.05036	0.920681	1.03971	0.933733	1.0239	0.552702	0.532181		2.12424	1.82509		0.514567	0.749679		3.12386	0.0224838	3.64033	0.0651191	0.858127	0.584731
F1RMF9	365	S	Uncharacterized protein	Protein FAM111B OS=Homo sapiens GN=FAM111B PE=1 SV=1	Protein FAM111A OS=Mus musculus GN=Fam111a PE=2 SV=1	FAM111B	0.643	0.689	0.779	1.767	1.629	1.568	0.689	0.78	0.69	1.11443	1.00834	0.977308	1.0168	1.07314	1.02203	0.879998	0.927866	0.998775	0.576974	0.683302	0.797087	1.73781	1.51798	1.5342	0.782956	0.840638	0.690846	2.06961	0.00137895	2.32822	0.000700872	0.888925	0.335976
F1RMJ0	421	T	Tyrosine-protein kinase			FES	1.153	1.158	1.111	0.952	0.964	0.979	0.915	0.895	0.932	1.15588	1.14437	1.15145	0.844383	0.797144	0.798603	1.00084	1.04664	1.09715	0.997507	1.01191	0.964868	1.12745	1.20932	1.22589	0.914231	0.855121	0.849477	1.3604	0.00176953	1.19782	0.0119546	1.13573	0.0123929
F1RMJ5	306	S	Phosphodiesterase			PDE8A		0.766			1.424			0.878		0.933953	1.03038		1.02838	0.998977		1.03442	0.973074			0.743415			1.42546			0.902295		1.57981		1.91745		0.823916
F1RMJ9	192	S	Oxysterol-binding protein			OSBP	0.624	0.547	0.588	1.847	2.047	1.882	0.639	0.566	0.575	1.10838	1.05909	1.05914	0.857796	0.831304	0.876106	1.05199	1.09215	1.08131	0.562981	0.51648	0.555168	2.15319	2.4624	2.14814	0.607423	0.518246	0.531765	4.08084	0.00220528	4.13777	0.00318057	0.986242	0.823503
F1RMJ9	242	S	Oxysterol-binding protein			OSBP	1.089	1.108	0.989	0.83	0.826	1.011	1.079	1.055	1.014	1.10838	1.05909	1.05914	0.857796	0.831304	0.876106	1.05199	1.09215	1.08131	0.982511	1.04618	0.933778	0.967596	0.993619	1.15397	1.02568	0.965988	0.937755	1.06341	0.40877	1.05155	0.498909	1.01128	0.804895
F1RMJ9	195	S	Oxysterol-binding protein			OSBP	0.776	0.675	0.725	1.53	1.72	1.559	0.769	0.718	0.748	1.10838	1.05909	1.05914	0.857796	0.831304	0.876106	1.05199	1.09215	1.08131	0.700118	0.637338	0.684519	1.78364	2.06904	1.77946	0.730999	0.657422	0.691756	2.70753	0.00476225	2.78547	0.00490266	0.972021	0.532875
F1RMN5	348	S	Uncharacterized protein	Amyloid beta A4 precursor protein-binding family B member 1 OS=Homo sapiens GN=APBB1 PE=1 SV=2	Amyloid beta A4 precursor protein-binding family B member 1 OS=Mus musculus GN=Apbb1 PE=1 SV=3	APBB1	0.806			1.296			0.941
F1RMN8	7	S	Uncharacterized protein	Tripartite motif-containing protein 3 OS=Homo sapiens GN=TRIM3 PE=1 SV=2	Tripartite motif-containing protein 3 OS=Mus musculus GN=Trim3 PE=1 SV=1	TRIM3	0.623	0.638		1.801	1.603		0.679	0.849		1.00233	1.03053	1.04861	0.91612	0.94755	0.843518	1.07461	1.01828	1.1114	0.621549	0.619097		1.9659	1.69173		0.631855	0.833756		2.49564	0.0286125	2.94817	0.071887	0.846504	0.465618
F1RMR6	349	T	Uncharacterized protein	Hsp70-binding protein 1 OS=Homo sapiens GN=HSPBP1 PE=1 SV=1	Hsp70-binding protein 1 OS=Mus musculus GN=Hspbp1 PE=1 SV=1	HSPBP1	0.582	0.463	0.494	1.857	2.055	2.003	0.668	0.638	0.549	1.07661	0.794036	0.925855	0.92524	1.40959	1.1807	0.992763	0.827477	0.887792	0.540587	0.583097	0.533561	2.00705	1.45787	1.69645	0.67287	0.771019	0.618388	2.50275	0.0170238	3.11442	0.0172803	0.8036	0.0812612
F1RMV5	93	S	Uncharacterized protein	Persulfide dioxygenase ETHE1, mitochondrial OS=Homo sapiens GN=ETHE1 PE=1 SV=2	Persulfide dioxygenase ETHE1, mitochondrial OS=Mus musculus GN=Ethe1 PE=1 SV=2	---	0.779			1.411			0.867			0.935525	0.978993	1.01359	1.06745	0.945997	0.934244	0.989021	1.05057	1.05305	0.832688			1.32184			0.876624			1.50788		1.58744		0.94988
F1RMW4	260	S	Uncharacterized protein	DNA repair protein XRCC1 OS=Homo sapiens GN=XRCC1 PE=1 SV=2	DNA repair protein XRCC1 OS=Mus musculus GN=Xrcc1 PE=1 SV=2	XRCC1	0.703			1.787			0.619			1.08555	1.12905	1.09697	0.87575	0.851689	0.838998	1.05031	0.983177	0.990116	0.647599			2.04054			0.589351			3.46235		3.15093		1.09883
F1RMW4	285	S	Uncharacterized protein	DNA repair protein XRCC1 OS=Homo sapiens GN=XRCC1 PE=1 SV=2	DNA repair protein XRCC1 OS=Mus musculus GN=Xrcc1 PE=1 SV=2	XRCC1										1.08555	1.12905	1.09697	0.87575	0.851689	0.838998	1.05031	0.983177	0.990116
F1RMY0	496	S	Uncharacterized protein	PERQ amino acid-rich with GYF domain-containing protein 1 OS=Homo sapiens GN=GIGYF1 PE=1 SV=2	PERQ amino acid-rich with GYF domain-containing protein 1 OS=Mus musculus GN=Gigyf1 PE=1 SV=2	---	0.694	0.734	0.681	1.534	1.463	1.424	0.842	0.876	0.913
F1RMY1	538	S	Uncharacterized protein	Leucine-rich repeat and calponin homology domain-containing protein 4 OS=Homo sapiens GN=LRCH4 PE=1 SV=2	Leucine-rich repeat and calponin homology domain-containing protein 4 OS=Mus musculus GN=Lrch4 PE=1 SV=1	LRCH4	0.832			1.238			0.966
F1RMY6	189	S	Uncharacterized protein	TSC22 domain family protein 4 OS=Homo sapiens GN=TSC22D4 PE=1 SV=2	TSC22 domain family protein 4 OS=Mus musculus GN=Tsc22d4 PE=1 SV=2	LOC100512339	0.819			1.303			0.924
F1RMY9	69	S	Uncharacterized protein	7SK snRNA methylphosphate capping enzyme OS=Homo sapiens GN=MEPCE PE=1 SV=1	7SK snRNA methylphosphate capping enzyme OS=Mus musculus GN=Mepce PE=1 SV=2	MEPCE	0.442	0.36	0.447	2.176	2.375	2.134	0.525	0.471	0.47	0.97804	1.15226	0.888376	1.01954	0.790493	1.04304	0.956514	0.931477	0.996253	0.451924	0.31243	0.503165	2.13431	3.00445	2.04595	0.548868	0.505649	0.471767	4.70732	0.024787	5.66833	0.0202741	0.830461	0.266511
F1RMY9	60	S	Uncharacterized protein	7SK snRNA methylphosphate capping enzyme OS=Homo sapiens GN=MEPCE PE=1 SV=1	7SK snRNA methylphosphate capping enzyme OS=Mus musculus GN=Mepce PE=1 SV=2	MEPCE	0.447	0.352	0.439	2.106	2.364	2.114	0.581	0.487	0.496	0.97804	1.15226	0.888376	1.01954	0.790493	1.04304	0.956514	0.931477	0.996253	0.457036	0.305487	0.49416	2.06565	2.99054	2.02678	0.607414	0.522826	0.497865	4.35043	0.027602	5.63623	0.0223251	0.771869	0.154263
F1RMY9	216	S	Uncharacterized protein	7SK snRNA methylphosphate capping enzyme OS=Homo sapiens GN=MEPCE PE=1 SV=1	7SK snRNA methylphosphate capping enzyme OS=Mus musculus GN=Mepce PE=1 SV=2	MEPCE	0.684			1.633			0.766			0.97804	1.15226	0.888376	1.01954	0.790493	1.04304	0.956514	0.931477	0.996253	0.699358			1.60171			0.800825			2.00007		2.29026		0.873297
F1RN07	353	S	Nuclear factor interleukin-3-regulated protein			NFIL3	0.809	0.842	0.88	1.234	1.16	1.113	0.99	1.026	1.017
F1RN07	301	S	Nuclear factor interleukin-3-regulated protein			NFIL3	0.899	0.798	0.814	1.325	1.41	1.378	0.83	0.86	0.834
F1RN27	166	S	Uncharacterized protein	M-phase phosphoprotein 8 OS=Homo sapiens GN=MPHOSPH8 PE=1 SV=2	M-phase phosphoprotein 8 OS=Mus musculus GN=Mphosph8 PE=1 SV=1	MPHOSPH8	0.422	0.366		2.249	2.364		0.482	0.473		1.01919	1.01165	0.663842	1.01472	1.07299	1.62473	0.968982	0.963742	0.684898	0.414055	0.361786		2.21636	2.20318		0.497429	0.490795		4.47221	0.000240102	5.69646	0.0056868	0.785085	0.148777
F1RN27	53	S	Uncharacterized protein	M-phase phosphoprotein 8 OS=Homo sapiens GN=MPHOSPH8 PE=1 SV=2	M-phase phosphoprotein 8 OS=Mus musculus GN=Mphosph8 PE=1 SV=1	MPHOSPH8	0.432	0.458	0.421	2.249	2.155	2.219	0.472	0.56	0.417	1.01919	1.01165	0.663842	1.01472	1.07299	1.62473	0.968982	0.963742	0.684898	0.423866	0.452727	0.634188	2.21636	2.0084	1.36576	0.487109	0.581068	0.60885	3.33359	0.0341483	3.70042	0.0274406	0.900868	0.513574
F1RN27	552	T	Uncharacterized protein	M-phase phosphoprotein 8 OS=Homo sapiens GN=MPHOSPH8 PE=1 SV=2	M-phase phosphoprotein 8 OS=Mus musculus GN=Mphosph8 PE=1 SV=1	MPHOSPH8	0.705	0.662	0.782	1.582	1.571	1.532	0.79	0.853	0.72	1.01919	1.01165	0.663842	1.01472	1.07299	1.62473	0.968982	0.963742	0.684898	0.691726	0.654378	1.17799	1.55904	1.46413	0.942923	0.815289	0.885092	1.05125	1.44136	0.158359	1.57129	0.133886	0.917309	0.708977
F1RN27	351	S	Uncharacterized protein	M-phase phosphoprotein 8 OS=Homo sapiens GN=MPHOSPH8 PE=1 SV=2	M-phase phosphoprotein 8 OS=Mus musculus GN=Mphosph8 PE=1 SV=1	MPHOSPH8	0.45	0.321	0.527	2.187	2.414	1.923	0.509	0.473	0.592	1.01919	1.01165	0.663842	1.01472	1.07299	1.62473	0.968982	0.963742	0.684898	0.441528	0.317304	0.793864	2.15526	2.24978	1.18358	0.525294	0.490795	0.864363	2.97196	0.0554665	3.5993	0.0429208	0.825704	0.589357
F1RN27	284	S	Uncharacterized protein	M-phase phosphoprotein 8 OS=Homo sapiens GN=MPHOSPH8 PE=1 SV=2	M-phase phosphoprotein 8 OS=Mus musculus GN=Mphosph8 PE=1 SV=1	MPHOSPH8	0.542			2.025			0.562			1.01919	1.01165	0.663842	1.01472	1.07299	1.62473	0.968982	0.963742	0.684898	0.531795			1.99562			0.57999			3.44077		3.7526		0.916904
F1RN62	16	S	Solute carrier organic anion transporter family member			SLCO4C1	0.824	0.763		1.445	1.445		0.797	0.863
F1RN66	1090	S	Uncharacterized protein	Chromodomain-helicase-DNA-binding protein 1 OS=Homo sapiens GN=CHD1 PE=1 SV=2	Chromodomain-helicase-DNA-binding protein 1 OS=Mus musculus GN=Chd1 PE=1 SV=3	CHD1	0.532	0.548	0.602	2.02	1.878	1.779	0.577	0.705	0.657	0.982109	1.00771	0.958964	1.01982	1.08936	1.14528	1.01265	0.892136	0.892839	0.541691	0.543809	0.627761	1.98074	1.72394	1.55333	0.56979	0.790238	0.735855	2.50873	0.00464139	3.06901	0.00826309	0.817441	0.184917
F1RN66	1761	S	Uncharacterized protein	Chromodomain-helicase-DNA-binding protein 1 OS=Homo sapiens GN=CHD1 PE=1 SV=2	Chromodomain-helicase-DNA-binding protein 1 OS=Mus musculus GN=Chd1 PE=1 SV=3	CHD1	0.52	0.46	0.642	2.006	2.106	1.659	0.599	0.6	0.731	0.982109	1.00771	0.958964	1.01982	1.08936	1.14528	1.01265	0.892136	0.892839	0.529473	0.456482	0.669473	1.96701	1.93324	1.44855	0.591515	0.672543	0.818737	2.56809	0.0133277	3.23107	0.0104123	0.79481	0.193757
F1RN87	356	S	Uncharacterized protein	ARF GTPase-activating protein GIT1 OS=Homo sapiens GN=GIT1 PE=1 SV=2	ARF GTPase-activating protein GIT1 OS=Mus musculus GN=Git1 PE=1 SV=1	---	0.616		0.565	1.898		1.877	0.603		0.6	1.27512	1.06138	1.03181	0.786419	0.76811	0.837186	0.943867	1.12284	1.08285	0.483092		0.547579	2.41347		2.24204	0.638861		0.554092	3.90251	0.0107314	4.51697	0.0151623	0.863966	0.275492
F1RN87	382	S	Uncharacterized protein	ARF GTPase-activating protein GIT1 OS=Homo sapiens GN=GIT1 PE=1 SV=2	ARF GTPase-activating protein GIT1 OS=Mus musculus GN=Git1 PE=1 SV=1	---	0.499	0.466	0.505	2.081	2.177	2.032	0.556	0.534	0.512	1.27512	1.06138	1.03181	0.786419	0.76811	0.837186	0.943867	1.12284	1.08285	0.391336	0.43905	0.489429	2.64617	2.83423	2.42718	0.589066	0.475578	0.472826	5.14324	0.00138052	5.99143	0.00181096	0.858433	0.208326
F1RN89	658	S	Uncharacterized protein	Nuclear fragile X mental retardation-interacting protein 2 OS=Homo sapiens GN=NUFIP2 PE=1 SV=1	Nuclear fragile X mental retardation-interacting protein 2 OS=Mus musculus GN=Nufip2 PE=1 SV=1	NUFIP2	0.387	0.406		2.321	2.264		0.453	0.518		0.566805	0.615421	0.725078	1.95216	1.83061	1.5359	0.538703	0.642111	0.719529	0.682775	0.659711		1.18894	1.23674		0.840909	0.806714		1.47223	0.00821203	1.80686	0.00948615	0.814802	0.025204
F1RN91	924	S	Uncharacterized protein	Unconventional myosin-XVIIIa OS=Homo sapiens GN=MYO18A PE=1 SV=3	Unconventional myosin-XVIIIa OS=Mus musculus GN=Myo18a PE=1 SV=2	---	0.8	0.67	0.625	1.282	1.566	1.673	0.958	0.85	0.734	1.10384	0.98145	1.00427	1.07808	1.10295	1.11748	1.00522	0.926207	0.900515	0.724744	0.682663	0.62234	1.18915	1.41983	1.49712	0.953021	0.917721	0.815089	1.5288	0.0220728	2.02296	0.0113334	0.755724	0.0156505
F1RN91	901	S	Uncharacterized protein	Unconventional myosin-XVIIIa OS=Homo sapiens GN=MYO18A PE=1 SV=3	Unconventional myosin-XVIIIa OS=Mus musculus GN=Myo18a PE=1 SV=2	---	0.698	0.705	0.671	1.691	1.604	1.722	0.704	0.787	0.646	1.10384	0.98145	1.00427	1.07808	1.10295	1.11748	1.00522	0.926207	0.900515	0.632339	0.718325	0.668144	1.56853	1.45428	1.54096	0.700341	0.849702	0.717367	2.01277	0.000331226	2.26063	7.40512e-05	0.890359	0.217379
F1RNA4	880	T	Uncharacterized protein	PHD finger protein 12 OS=Homo sapiens GN=PHF12 PE=1 SV=2	PHD finger protein 12 OS=Mus musculus GN=Phf12 PE=1 SV=1	PHF12	0.909	0.856	0.796	1.181	1.281	1.275	0.945	0.913	0.944	1.05844			0.894969			1.04267			0.858815			1.3196			0.906326			1.45599		1.53654		0.947578
F1RNA4	671	T	Uncharacterized protein	PHD finger protein 12 OS=Homo sapiens GN=PHF12 PE=1 SV=2	PHD finger protein 12 OS=Mus musculus GN=Phf12 PE=1 SV=1	PHF12	0.726	0.675	0.772	1.652	1.676	1.496	0.71	0.754	0.763	1.05844			0.894969			1.04267			0.685918			1.84587			0.680944			2.71076		2.6911		1.0073
F1RND9	98	S	Uncharacterized protein	Gamma-interferon-inducible protein 16 OS=Homo sapiens GN=IFI16 PE=1 SV=3	Interferon-activable protein 204 OS=Mus musculus GN=Ifi204 PE=1 SV=1	---	0.744		0.836	1.804		1.345	0.566		0.845	1.42295	1.24897	1.29987	0.408098	0.614328	0.55059	1.12781	1.14121	1.21037	0.522857		0.643142	4.4205		2.44284	0.501857		0.698134	5.71949	0.210952	5.88623	0.211584	0.971673	0.898556
F1RNE8	312	S	Uncharacterized protein	Leukocyte immunoglobulin-like receptor subfamily A member 5 OS=Homo sapiens GN=LILRA5 PE=1 SV=1	Leukocyte immunoglobulin-like receptor subfamily B member 4 OS=Mus musculus GN=Lilrb4 PE=1 SV=1	LOC100511639	0.879			1.327			0.848
F1RNF5	32	S	Uncharacterized protein	Liprin-beta-2 OS=Homo sapiens GN=PPFIBP2 PE=1 SV=3	Liprin-beta-2 OS=Mus musculus GN=Ppfibp2 PE=1 SV=3	---	0.789	0.756		1.433	1.403		0.839	0.904
F1RNH0	461	T	Uncharacterized protein	Lysophospholipid acyltransferase 7 OS=Homo sapiens GN=MBOAT7 PE=1 SV=2	Lysophospholipid acyltransferase 7 OS=Mus musculus GN=Mboat7 PE=1 SV=1	MBOAT7	0.479	0.505	0.573	2.05	2.008	1.809	0.599	0.638	0.656	0.911447	0.926539	0.930193	1.18825	1.16225	1.08333	0.902249	0.908749	0.975339	0.525538	0.545039	0.616001	1.72523	1.72768	1.66986	0.663896	0.702064	0.672587	2.51295	8.86142e-06	3.03737	1.33644e-05	0.827343	0.0356932
F1RNH0	287	S	Uncharacterized protein	Lysophospholipid acyltransferase 7 OS=Homo sapiens GN=MBOAT7 PE=1 SV=2	Lysophospholipid acyltransferase 7 OS=Mus musculus GN=Mboat7 PE=1 SV=1	MBOAT7	0.805	0.595		1.395	1.869		0.856	0.669		0.911447	0.926539	0.930193	1.18825	1.16225	1.08333	0.902249	0.908749	0.975339	0.883211	0.642175		1.174	1.60809		0.94874	0.736177		1.65117	0.19695	1.82386	0.160807	0.905319	0.669479
F1RNI3	307	S	Uncharacterized protein	U4/U6 small nuclear ribonucleoprotein Prp31 OS=Homo sapiens GN=PRPF31 PE=1 SV=2	U4/U6 small nuclear ribonucleoprotein Prp31 OS=Mus musculus GN=Prpf31 PE=1 SV=3	PRPF31	1.018	0.844	0.945	1.04	1.285	0.96	0.965	0.921	1.1	1.09244	1.14679	1.06197	0.867299	0.801909	0.847095	1.02733	1.04377	1.07236	0.931856	0.73597	0.889859	1.19913	1.60243	1.13329	0.93933	0.882382	1.02577	1.38186	0.123025	1.53844	0.0728216	0.898226	0.262185
F1RNI4	181	S	Uncharacterized protein	TCF3 fusion partner OS=Homo sapiens GN=TFPT PE=1 SV=1	TCF3 fusion partner homolog OS=Mus musculus GN=Tfpt PE=1 SV=1	TFPT	0.775	0.822	0.772	1.472	1.445	1.505	0.82	0.808	0.754		1.05043			1.14619			0.824892			0.782539			1.2607			0.979522		1.28705		1.61103		0.798899
F1RNI4	250	S	Uncharacterized protein	TCF3 fusion partner OS=Homo sapiens GN=TFPT PE=1 SV=1	TCF3 fusion partner homolog OS=Mus musculus GN=Tfpt PE=1 SV=1	TFPT	0.681	0.629	0.696	1.619	1.792	1.607	0.781	0.701	0.73		1.05043			1.14619			0.824892			0.598804			1.56344			0.849808		1.83975		2.61093		0.704635
F1RNI4	208	T	Uncharacterized protein	TCF3 fusion partner OS=Homo sapiens GN=TFPT PE=1 SV=1	TCF3 fusion partner homolog OS=Mus musculus GN=Tfpt PE=1 SV=1	TFPT	0.753	0.673		1.505	1.567		0.813	0.846			1.05043			1.14619			0.824892			0.640692			1.36714			1.02559		1.33303		2.13384		0.624707
F1RNJ4	1043	T	Uncharacterized protein	DENN domain-containing protein 5A OS=Homo sapiens GN=DENND5A PE=1 SV=2	DENN domain-containing protein 5A OS=Mus musculus GN=Dennd5a PE=1 SV=1	DENND5A	0.808			1.456			0.802
F1RNJ4	1060	S	Uncharacterized protein	DENN domain-containing protein 5A OS=Homo sapiens GN=DENND5A PE=1 SV=2	DENN domain-containing protein 5A OS=Mus musculus GN=Dennd5a PE=1 SV=1	DENND5A	0.809	0.675	0.779	1.683	1.764	1.456	0.609	0.682	0.793
F1RNM3	91	S	Uncharacterized protein	Protein phosphatase 1 regulatory subunit 35 OS=Homo sapiens GN=PPP1R35 PE=1 SV=1	Protein phosphatase 1 regulatory subunit 35 OS=Mus musculus GN=Ppp1r35 PE=1 SV=1	PPP1R35	0.694			1.804			0.611
F1RNP1	548	S	Uncharacterized protein	Zinc finger protein with KRAB and SCAN domains 1 OS=Homo sapiens GN=ZKSCAN1 PE=1 SV=3	Zinc finger protein with KRAB and SCAN domains 1 OS=Mus musculus GN=Zkscan1 PE=2 SV=1	ZKSCAN1	0.904	0.77	0.888	1.166	1.344	0.974	0.961	0.94	1.141	1.12694	1.14002	1.18335	0.718118	0.783394	0.633299	1.15031	1.04396	1.17913	0.802171	0.675424	0.750411	1.62369	1.71561	1.53798	0.835427	0.900418	0.967659	1.80406	0.00052824	2.18908	0.000274906	0.824118	0.0404267
F1RNP1	13	S	Uncharacterized protein	Zinc finger protein with KRAB and SCAN domains 1 OS=Homo sapiens GN=ZKSCAN1 PE=1 SV=3	Zinc finger protein with KRAB and SCAN domains 1 OS=Mus musculus GN=Zkscan1 PE=2 SV=1	ZKSCAN1	0.797	0.785	0.793	1.424	1.386	1.343	0.84	0.892	0.885	1.12694	1.14002	1.18335	0.718118	0.783394	0.633299	1.15031	1.04396	1.17913	0.707223	0.688582	0.67013	1.98296	1.76923	2.12064	0.730238	0.854439	0.75055	2.51488	0.00337075	2.8427	0.00598785	0.884683	0.136423
F1RNP1	208	S	Uncharacterized protein	Zinc finger protein with KRAB and SCAN domains 1 OS=Homo sapiens GN=ZKSCAN1 PE=1 SV=3	Zinc finger protein with KRAB and SCAN domains 1 OS=Mus musculus GN=Zkscan1 PE=2 SV=1	ZKSCAN1	0.845	0.854	0.855	1.382	1.297	1.232	0.832	0.903	0.931	1.12694	1.14002	1.18335	0.718118	0.783394	0.633299	1.15031	1.04396	1.17913	0.749817	0.749107	0.722524	1.92448	1.65562	1.94537	0.723284	0.864976	0.789562	2.32375	0.00285356	2.48732	0.00669841	0.934236	0.330048
F1RNP1	471	S	Uncharacterized protein	Zinc finger protein with KRAB and SCAN domains 1 OS=Homo sapiens GN=ZKSCAN1 PE=1 SV=3	Zinc finger protein with KRAB and SCAN domains 1 OS=Mus musculus GN=Zkscan1 PE=2 SV=1	ZKSCAN1	1.03	0.841	1	0.809	0.922	0.783	1.15	1.224	1.212	1.12694	1.14002	1.18335	0.718118	0.783394	0.633299	1.15031	1.04396	1.17913	0.913978	0.737704	0.845057	1.12656	1.17693	1.23638	0.999731	1.17246	1.02787	1.10619	0.159022	1.4178	0.0077002	0.780216	0.0341664
F1RNP6	504	S	Uncharacterized protein	Calcium/calmodulin-dependent protein kinase kinase 2 OS=Homo sapiens GN=CAMKK2 PE=1 SV=2	Calcium/calmodulin-dependent protein kinase kinase 2 OS=Mus musculus GN=Camkk2 PE=1 SV=2	CAMKK2	0.756			1.537			0.781
F1RNP6	121	S	Uncharacterized protein	Calcium/calmodulin-dependent protein kinase kinase 2 OS=Homo sapiens GN=CAMKK2 PE=1 SV=2	Calcium/calmodulin-dependent protein kinase kinase 2 OS=Mus musculus GN=Camkk2 PE=1 SV=2	CAMKK2	0.696		0.725	1.595		1.539	0.788		0.766
F1RNR2	1664	S	Uncharacterized protein	Histone-lysine N-methyltransferase SETD1B OS=Homo sapiens GN=SETD1B PE=1 SV=3	Histone-lysine N-methyltransferase SETD1B OS=Mus musculus GN=Setd1b PE=1 SV=2	SETD1B	0.746		0.822	1.526		1.387	0.8		0.818
F1RNR2	1340	S	Uncharacterized protein	Histone-lysine N-methyltransferase SETD1B OS=Homo sapiens GN=SETD1B PE=1 SV=3	Histone-lysine N-methyltransferase SETD1B OS=Mus musculus GN=Setd1b PE=1 SV=2	SETD1B	0.963			1.673			0.477
F1RNR7	12	S	Uncharacterized protein	26S proteasome non-ATPase regulatory subunit 9 OS=Homo sapiens GN=PSMD9 PE=1 SV=3	26S proteasome non-ATPase regulatory subunit 9 OS=Mus musculus GN=Psmd9 PE=1 SV=1	PSMD9	0.512	0.43	0.425	1.976	2.25	2.157	0.632	0.508	0.469	0.763172	0.779238	0.754148	1.18114	1.25686	1.28532	1.0508	0.975719	0.940335	0.670884	0.551821	0.56355	1.67296	1.79018	1.67819	0.601446	0.520642	0.498758	3.172	2.56384e-05	2.87827	3.17205e-05	1.10205	0.326386
F1RNS8	71	Y	Uncharacterized protein	28 kDa heat- and acid-stable phosphoprotein OS=Homo sapiens GN=PDAP1 PE=1 SV=1	28 kDa heat- and acid-stable phosphoprotein OS=Mus musculus GN=Pdap1 PE=1 SV=1	PDAP1	0.276		0.155	2.562		2.671	0.35		0.24	0.501068	0.443402	0.531392	2.02839	2.1112	1.75163	0.515237	0.529971	0.679446	0.550823		0.291687	1.26307		1.52487	0.679299		0.353229	2.70011	0.0566024	3.30908	0.0340405	0.815968	0.694978
F1RNS8	64	S	Uncharacterized protein	28 kDa heat- and acid-stable phosphoprotein OS=Homo sapiens GN=PDAP1 PE=1 SV=1	28 kDa heat- and acid-stable phosphoprotein OS=Mus musculus GN=Pdap1 PE=1 SV=1	PDAP1	0.471	0.635	0.538	2.114	1.835	1.982	0.552	0.66	0.528	0.501068	0.443402	0.531392	2.02839	2.1112	1.75163	0.515237	0.529971	0.679446	0.939991	1.43211	1.01243	1.0422	0.869176	1.13152	1.07135	1.24535	0.777104	0.983545	0.920367	0.899059	0.555229	1.09397	0.66201
F1RNS8	61	S	Uncharacterized protein	28 kDa heat- and acid-stable phosphoprotein OS=Homo sapiens GN=PDAP1 PE=1 SV=1	28 kDa heat- and acid-stable phosphoprotein OS=Mus musculus GN=Pdap1 PE=1 SV=1	PDAP1	0.474	0.501	0.427	2.086	2.058	2.151	0.572	0.6	0.473	0.501068	0.443402	0.531392	2.02839	2.1112	1.75163	0.515237	0.529971	0.679446	0.945979	1.1299	0.803549	1.0284	0.974803	1.228	1.11017	1.13214	0.696155	1.09962	0.586979	1.12217	0.392583	0.97991	0.914406
F1RNT5	523	S	Uncharacterized protein	MLX-interacting protein OS=Homo sapiens GN=MLXIP PE=1 SV=2	MLX-interacting protein OS=Mus musculus GN=Mlxip PE=1 SV=1	MLXIP
F1RNV1	677	S	Uncharacterized protein			KIAA0355	0.776	0.762		1.584	1.451		0.724	0.859
F1RNW3	152	S	Uncharacterized protein	Protein LSM14 homolog A OS=Homo sapiens GN=LSM14A PE=1 SV=3	Protein LSM14 homolog A OS=Mus musculus GN=Lsm14a PE=1 SV=1	LSM14A	0.611	0.553	0.5	1.935	1.95	2.008	0.576	0.641	0.538	0.847085	0.777319	1.01742	1.14495	1.43263	1.03516	1.00719	0.822473	0.941022	0.721297	0.711419	0.491441	1.69003	1.36113	1.9398	0.571887	0.779357	0.571719	2.59546	0.015079	2.59384	0.0140714	1.00062	0.997073
F1RNW3	176	S	Uncharacterized protein	Protein LSM14 homolog A OS=Homo sapiens GN=LSM14A PE=1 SV=3	Protein LSM14 homolog A OS=Mus musculus GN=Lsm14a PE=1 SV=1	LSM14A	0.51	0.442	0.489	2.122	2.202	2.066	0.509	0.535	0.494	0.847085	0.777319	1.01742	1.14495	1.43263	1.03516	1.00719	0.822473	0.941022	0.602065	0.568621	0.480629	1.85336	1.53703	1.99583	0.505365	0.650477	0.524961	3.20455	0.00686926	3.26178	0.00812542	0.982456	0.874297
F1RNX2	119	S	Programmed cell death protein 5			PDCD5	0.517	0.518	0.625	2.046	2.096	1.87	0.568	0.554	0.551	0.45161	0.404863	0.425552	2.05911	2.08847	2.13081	0.532355	0.595239	0.398922	1.14479	1.27945	1.46868	0.993633	1.00361	0.877601	1.06696	0.930719	1.38122	0.850822	0.334757	0.738479	0.0521173	1.15213	0.359073
F1RNX2	125	Y	Programmed cell death protein 5			PDCD5	0.607	0.551	0.659	1.898	1.983	1.751	0.611	0.616	0.63	0.45161	0.404863	0.425552	2.05911	2.08847	2.13081	0.532355	0.595239	0.398922	1.34408	1.36095	1.54858	0.921757	0.949499	0.821753	1.14773	1.03488	1.57925	0.715871	0.158942	0.633111	0.00495504	1.13072	0.43492
F1RNX2	51	S	Programmed cell death protein 5			PDCD5	0.756		0.84	1.183		1.199	1.084		0.976	0.45161	0.404863	0.425552	2.05911	2.08847	2.13081	0.532355	0.595239	0.398922	1.67401		1.97391	0.57452		0.562697	2.03623		2.44659	0.253683	0.0774821	0.311744	0.0752867	0.813755	0.253358
F1RNZ0	197	S	Uncharacterized protein	Pleckstrin homology domain-containing family F member 1 OS=Homo sapiens GN=PLEKHF1 PE=1 SV=3	Pleckstrin homology domain-containing family F member 1 OS=Mus musculus GN=Plekhf1 PE=2 SV=1	PLEKHF1	1.375	1.353	1.337	0.553	0.492	0.489	1.053	1.102	1.178	1.38071		1.29798	0.488758		0.603944	1.11968		1.12233	0.995866		1.03007	1.13144		0.809678	0.94045		1.0496	0.975411	0.905461	0.958135	0.836063	1.01803	0.799653
F1RP07	694	S	Uncharacterized protein	Phosphorylase b kinase regulatory subunit beta OS=Homo sapiens GN=PHKB PE=1 SV=3	Phosphorylase b kinase regulatory subunit beta OS=Mus musculus GN=Phkb PE=1 SV=1	PHKB	0.925	0.84	0.928	1.174	1.219	1.048	0.936	0.98	1.034		1.12642	1.1503		0.73239	0.629508		1.12019	1.23163		0.745728	0.806746		1.66441	1.66479		0.874855	0.83954	1.94191	0.0139092	2.14445	0.0218498	0.905553	0.179046
F1RP17	254	S	T-complex protein 1 subunit gamma			CCT3	0.685			1.596			0.796			1.1416	1.13246	1.12039	0.76338	0.746122	0.84936	1.0708	1.08193	1.01865	0.600034			2.0907			0.743372			2.81246		3.48431		0.807179
F1RP31	225	S	Uncharacterized protein	Myocyte-specific enhancer factor 2D OS=Homo sapiens GN=MEF2D PE=1 SV=1	Myocyte-specific enhancer factor 2D OS=Mus musculus GN=Mef2d PE=1 SV=2	MEF2D
F1RP33	260	S	Uncharacterized protein	G patch domain-containing protein 4 OS=Homo sapiens GN=GPATCH4 PE=1 SV=2	G patch domain-containing protein 4 OS=Mus musculus GN=Gpatch4 PE=1 SV=1	GPATCH4	0.719			1.673			0.698
F1RP33	222	S	Uncharacterized protein	G patch domain-containing protein 4 OS=Homo sapiens GN=GPATCH4 PE=1 SV=2	G patch domain-containing protein 4 OS=Mus musculus GN=Gpatch4 PE=1 SV=1	GPATCH4	0.709			1.591			0.778
F1RP39	1421	T	Uncharacterized protein	Ras GTPase-activating-like protein IQGAP3 OS=Homo sapiens GN=IQGAP3 PE=1 SV=2	Ras GTPase-activating-like protein IQGAP1 OS=Mus musculus GN=Iqgap1 PE=1 SV=2	IQGAP3										0.975242	1.06296	0.956249	1.14023	0.982843	1.12929	0.853107	0.957461	0.920482
F1RP70	127	S	Uncharacterized protein	RNA-binding protein 26 OS=Homo sapiens GN=RBM26 PE=1 SV=3	RNA-binding protein 26 OS=Mus musculus GN=Rbm26 PE=1 SV=2	RBM26	0.595	0.586	0.683	1.799	1.85	1.667	0.707	0.694	0.686	0.974954	0.986662	1.0638	1.0223	1.07073	0.937035	1.01524	0.961848	1.01455	0.610285	0.593922	0.64204	1.75975	1.72779	1.77901	0.696386	0.721528	0.676162	2.51498	9.04317e-07	2.85258	6.56738e-07	0.881653	0.0129487
F1RP70	518	S	Uncharacterized protein	RNA-binding protein 26 OS=Homo sapiens GN=RBM26 PE=1 SV=3	RNA-binding protein 26 OS=Mus musculus GN=Rbm26 PE=1 SV=2	RBM26										0.974954	0.986662	1.0638	1.0223	1.07073	0.937035	1.01524	0.961848	1.01455
F1RP77	1499	S	Uncharacterized protein	E3 ubiquitin-protein ligase MYCBP2 OS=Homo sapiens GN=MYCBP2 PE=1 SV=3	E3 ubiquitin-protein ligase MYCBP2 OS=Mus musculus GN=Mycbp2 PE=1 SV=2	MYCBP2	0.692	0.674	0.797	1.481	1.598	1.357	0.888	0.821	0.868	1.03801	1.07239	1.02323	0.960366	0.947182	0.95473	1.00151	0.980263	1.02386	0.666657	0.628501	0.778904	1.54212	1.68711	1.42134	0.886665	0.83753	0.847772	1.80818	0.00993798	2.24225	0.00172423	0.806411	0.0548273
F1RPA3	337	S	Uncharacterized protein	G-protein coupled receptor family C group 5 member B OS=Homo sapiens GN=GPRC5B PE=2 SV=2	G-protein coupled receptor family C group 5 member B OS=Mus musculus GN=Gprc5b PE=1 SV=1	GPRC5B	0.814			1.515			0.747					0.891427			1.13094			0.968733
F1RPC2	277	S	Uncharacterized protein	LIM domain kinase 2 OS=Homo sapiens GN=LIMK2 PE=1 SV=1	LIM domain kinase 2 OS=Mus musculus GN=Limk2 PE=1 SV=2	LIMK2	0.807	0.751		1.392	1.422		0.858	0.894		1.10374	1.27464	1.22288	0.787768	0.786506	0.659476	1.09934	0.93669	1.13557	0.731153	0.589186		1.76702	1.808		0.78047	0.954425		2.06065	0.0488042	2.70765	0.0276271	0.761048	0.21118
F1RPD4	64	S	Uncharacterized protein	Cytochrome b-c1 complex subunit 2, mitochondrial OS=Homo sapiens GN=UQCRC2 PE=1 SV=3	Cytochrome b-c1 complex subunit 2, mitochondrial OS=Mus musculus GN=Uqcrc2 PE=1 SV=1	LOC100620271	0.661	0.67		1.693	1.623		0.736	0.803		0.867366	1.01052	0.897819	1.22239	1.09411	1.08938	0.917788	0.907372	0.955661	0.762077	0.663026		1.38499	1.48339		0.801928	0.884973		1.70038	0.0127361	2.01275	0.00923063	0.844806	0.183957
F1RPD9	615	S	Uncharacterized protein	MORC family CW-type zinc finger protein 2 OS=Homo sapiens GN=MORC2 PE=1 SV=2	MORC family CW-type zinc finger protein 2A OS=Mus musculus GN=Morc2a PE=1 SV=2	MORC2	1.092	0.998	0.983	0.93	1.043	1.071	0.991	0.976	0.963	1.12034	1.13374		0.79957	0.808631		1.07336	1.04625		0.974707	0.880271		1.16313	1.28983		0.923269	0.93286		1.32155	0.131451	1.32237	0.0714298	0.99938	0.992247
F1RPD9	779	S	Uncharacterized protein	MORC family CW-type zinc finger protein 2 OS=Homo sapiens GN=MORC2 PE=1 SV=2	MORC family CW-type zinc finger protein 2A OS=Mus musculus GN=Morc2a PE=1 SV=2	MORC2	0.756	0.689		1.401	1.634		0.898	0.776		1.12034	1.13374		0.79957	0.808631		1.07336	1.04625		0.674797	0.607722		1.75219	2.0207		0.836626	0.7417		2.39044	0.0529399	2.94178	0.0551332	0.812582	0.139532
F1RPD9	777	S	Uncharacterized protein	MORC family CW-type zinc finger protein 2 OS=Homo sapiens GN=MORC2 PE=1 SV=2	MORC family CW-type zinc finger protein 2A OS=Mus musculus GN=Morc2a PE=1 SV=2	MORC2	0.756	0.689		1.401	1.634		0.898	0.776		1.12034	1.13374		0.79957	0.808631		1.07336	1.04625		0.674797	0.607722		1.75219	2.0207		0.836626	0.7417		2.39044	0.0529399	2.94178	0.0551332	0.812582	0.139532
F1RPE8	474	S	Uncharacterized protein	Eukaryotic elongation factor 2 kinase OS=Homo sapiens GN=EEF2K PE=1 SV=2	Eukaryotic elongation factor 2 kinase OS=Mus musculus GN=Eef2k PE=1 SV=1	EEF2K			0.593			1.759			0.684	1.10143		1.04681	0.842119		0.854236	1.05172		1.10237			0.566481			2.05915			0.620482	3.31863		3.63499		0.912969
F1RPM5	356	S	Uncharacterized protein	Methyl-CpG-binding domain protein 2 OS=Homo sapiens GN=MBD2 PE=1 SV=1	Methyl-CpG-binding domain protein 2 OS=Mus musculus GN=Mbd2 PE=2 SV=2	MBD2	0.644	0.547	0.583	1.856	1.901	1.796	0.612	0.688	0.657	1.06865		1.03615	0.995		0.998173	0.941804		0.968835	0.602629		0.56266	1.86533		1.79929	0.649817		0.678134	2.7596	0.00631138	3.14481	0.00264728	0.877509	0.0919354
F1RPN5	285	S	Uncharacterized protein	Growth factor receptor-bound protein 14 OS=Homo sapiens GN=GRB14 PE=1 SV=2	Growth factor receptor-bound protein 14 OS=Mus musculus GN=Grb14 PE=1 SV=1	GRB14	0.276	0.367	0.278	2.565	2.377	2.442	0.347	0.461	0.34	0.988416	0.993002	0.729597	0.980311	1.09592	1.3931	0.969775	0.914292	0.857589	0.279235	0.369586	0.381032	2.61652	2.16896	1.75293	0.357815	0.504215	0.39646	5.19543	0.0170986	6.34887	0.0166629	0.818324	0.23954
F1RPN5	279	S	Uncharacterized protein	Growth factor receptor-bound protein 14 OS=Homo sapiens GN=GRB14 PE=1 SV=2	Growth factor receptor-bound protein 14 OS=Mus musculus GN=Grb14 PE=1 SV=1	GRB14	0.502	0.489	0.606	2.009	1.997	1.802	0.614	0.662	0.631	0.988416	0.993002	0.729597	0.980311	1.09592	1.3931	0.969775	0.914292	0.857589	0.507884	0.492446	0.830596	2.04935	1.82222	1.29352	0.633136	0.724058	0.735784	2.46782	0.0421262	2.82103	0.0223712	0.874794	0.516215
F1RPP4	444	S	Uncharacterized protein	Methyl-CpG-binding domain protein 1 OS=Homo sapiens GN=MBD1 PE=1 SV=2	Methyl-CpG-binding domain protein 1 OS=Mus musculus GN=Mbd1 PE=1 SV=2	MBD1	0.737		0.708	1.481		1.586	0.847		0.737	0.977782	1.01726	0.992003	1.10253	1.15833	1.02388	0.954878	0.844573	0.98353	0.753747		0.713707	1.34328		1.54901	0.887025		0.749341	1.76751	0.0481834	1.97096	0.0816713	0.896776	0.425508
F1RPP4	351	S	Uncharacterized protein	Methyl-CpG-binding domain protein 1 OS=Homo sapiens GN=MBD1 PE=1 SV=2	Methyl-CpG-binding domain protein 1 OS=Mus musculus GN=Mbd1 PE=1 SV=2	MBD1	0.697	0.713	0.752	1.668	1.628	1.541	0.724	0.759	0.739	0.977782	1.01726	0.992003	1.10253	1.15833	1.02388	0.954878	0.844573	0.98353	0.712838	0.700903	0.758062	1.51289	1.40547	1.50506	0.758212	0.898679	0.751375	1.83677	0.000571761	2.03675	0.000330387	0.901812	0.237111
F1RPR2	293	S	Uncharacterized protein	CBP80/20-dependent translation initiation factor OS=Homo sapiens GN=CTIF PE=1 SV=1	CBP80/20-dependent translation initiation factor OS=Mus musculus GN=Ctif PE=1 SV=2	CTIF	0.644			1.763			0.692			0.938922			0.994919			1.0605			0.685893			1.772			0.652525			2.71561		2.5835		1.05114
F1RPS7	66	S	Uncharacterized protein		E3 ubiquitin-protein ligase Arkadia OS=Mus musculus GN=Rnf111 PE=1 SV=1	C18orf25	0.587	0.402	0.427	1.89	2.286	2.203	0.636	0.504	0.424
F1RPS8	33	S	ATP synthase subunit alpha			ATP5A1	0.72			1.66			0.71			0.929864	0.947605	0.999974	1.04073	1.03628	0.978933	0.998822	0.984397	1.01732	0.774307			1.59504			0.710838			2.24389		2.05996		1.08929
F1RPS8	146	S	ATP synthase subunit alpha			ATP5A1										0.929864	0.947605	0.999974	1.04073	1.03628	0.978933	0.998822	0.984397	1.01732
F1RPT5	315	S	Uncharacterized protein	Plakophilin-4 OS=Homo sapiens GN=PKP4 PE=1 SV=2	Plakophilin-4 OS=Mus musculus GN=Pkp4 PE=1 SV=1	PKP4	0.621	0.668	0.653	1.812	1.68	1.727	0.672	0.758	0.658			0.728371			1.61766			0.633064			0.896521			1.06759			1.03939	1.02713		1.19082		0.862546
F1RPT5	512	S	Uncharacterized protein	Plakophilin-4 OS=Homo sapiens GN=PKP4 PE=1 SV=2	Plakophilin-4 OS=Mus musculus GN=Pkp4 PE=1 SV=1	PKP4	0.76	0.621	0.61	1.533	1.795	1.676	0.782	0.706	0.744			0.728371			1.61766			0.633064			0.837485			1.03607			1.17524	0.881581		1.23712		0.71261
F1RPT5	282	S	Uncharacterized protein	Plakophilin-4 OS=Homo sapiens GN=PKP4 PE=1 SV=2	Plakophilin-4 OS=Mus musculus GN=Pkp4 PE=1 SV=1	PKP4	0.607	0.404	0.678	1.709	2.204	1.6	0.773	0.57	0.753			0.728371			1.61766			0.633064			0.930844			0.989084			1.18945	0.831545		1.06257		0.782581
F1RPT5	275	Y	Uncharacterized protein	Plakophilin-4 OS=Homo sapiens GN=PKP4 PE=1 SV=2	Plakophilin-4 OS=Mus musculus GN=Pkp4 PE=1 SV=1	PKP4	0.537		0.602	1.886		1.803	0.685		0.635			0.728371			1.61766			0.633064			0.826502			1.11457			1.00306	1.11118		1.34854		0.823982
F1RPT5	515	S	Uncharacterized protein	Plakophilin-4 OS=Homo sapiens GN=PKP4 PE=1 SV=2	Plakophilin-4 OS=Mus musculus GN=Pkp4 PE=1 SV=1	PKP4	0.581			1.809			0.71					0.728371			1.61766			0.633064
F1RPW7	348	S	Uncharacterized protein	Inner centromere protein OS=Homo sapiens GN=INCENP PE=1 SV=3	Inner centromere protein OS=Mus musculus GN=Incenp PE=1 SV=2	INCENP										0.891071	0.393049		1.31654	2.29706		0.809969	0.412194
F1RPW7	453	S	Uncharacterized protein	Inner centromere protein OS=Homo sapiens GN=INCENP PE=1 SV=3	Inner centromere protein OS=Mus musculus GN=Incenp PE=1 SV=2	INCENP	0.548		0.623	2.032		1.781	0.551		0.636	0.891071	0.393049		1.31654	2.29706		0.809969	0.412194		0.61499			1.54344			0.680273			2.26885		2.50969		0.904035
F1RPW7	145	S	Uncharacterized protein	Inner centromere protein OS=Homo sapiens GN=INCENP PE=1 SV=3	Inner centromere protein OS=Mus musculus GN=Incenp PE=1 SV=2	INCENP	0.487	0.535	0.466	2.085	1.978	2.083	0.562	0.635	0.5	0.891071	0.393049		1.31654	2.29706		0.809969	0.412194		0.546533	1.36115		1.58369	0.8611		0.693854	1.54054		1.09417	0.867899	1.28155	0.671289	0.853785	0.807111
F1RPW7	451	T	Uncharacterized protein	Inner centromere protein OS=Homo sapiens GN=INCENP PE=1 SV=3	Inner centromere protein OS=Mus musculus GN=Incenp PE=1 SV=2	INCENP	0.548			2.032			0.551			0.891071	0.393049		1.31654	2.29706		0.809969	0.412194		0.61499			1.54344			0.680273			2.26885		2.50969		0.904035
F1RPX0	644	S	Uncharacterized protein	Speckle targeted PIP5K1A-regulated poly(A) polymerase OS=Homo sapiens GN=TUT1 PE=1 SV=2	Speckle targeted PIP5K1A-regulated poly(A) polymerase OS=Mus musculus GN=Tut1 PE=1 SV=1	TUT1	0.795	0.663	0.714	1.449	1.73	1.633	0.82	0.721	0.69
F1RPX1	54	S	Uncharacterized protein	Metastasis-associated protein MTA2 OS=Homo sapiens GN=MTA2 PE=1 SV=1	Metastasis-associated protein MTA2 OS=Mus musculus GN=Mta2 PE=1 SV=1	MTA2	0.953	0.787	0.816	1.24	1.538	1.528	0.853	0.764	0.694	1.11664	1.13511	1.08717	0.859332	0.894459	0.920494	1.01277	0.952886	1.0298	0.85345	0.693325	0.750572	1.44298	1.71948	1.65998	0.842243	0.801774	0.673916	2.08049	0.00239112	2.09913	0.00264894	0.991118	0.925645
F1RPY5	420	S	Uncharacterized protein	Serine/threonine-protein kinase MARK2 OS=Homo sapiens GN=MARK2 PE=1 SV=2	Serine/threonine-protein kinase MARK2 OS=Mus musculus GN=Mark2 PE=1 SV=3	MARK2	0.66	0.768		1.777	1.46		0.666	0.845		1.06532	0.983267	1.04772	0.918081	1.07187	0.991127	1.01523	0.951953	0.965293	0.619531	0.781069		1.93556	1.36211		0.656011	0.887649		2.13627	0.164734	2.35447	0.165788	0.907324	0.667976
F1RPY8	81	S	Uncharacterized protein			C11orf84	0.664	0.754	0.793	1.61	1.338	1.39	0.805	0.961	0.842
F1RPY8	120	S	Uncharacterized protein			C11orf84	0.785	0.679	0.768	1.441	1.605	1.393	0.837	0.81	0.861
F1RQ08	474	S	Phosphoinositide phospholipase C			PLCB3	0.595		0.708	1.805		1.429	0.701		0.884	0.974172	0.958245	0.971941	1.00507	1.00915	0.931044	1.03753	1.02117	1.07218	0.610775		0.728439	1.79589		1.53484	0.675642		0.824486	2.2203	0.0435869	2.48707	0.0478056	0.892734	0.489767
F1RQ09	127	S	Uncharacterized protein	Bcl2-associated agonist of cell death OS=Homo sapiens GN=BAD PE=1 SV=3	Bcl2-associated agonist of cell death OS=Mus musculus GN=Bad PE=1 SV=1	BAD	0.472	0.523	0.467	2.063	2.031	2.098	0.594	0.602	0.485
F1RQ09	108	S	Uncharacterized protein	Bcl2-associated agonist of cell death OS=Homo sapiens GN=BAD PE=1 SV=3	Bcl2-associated agonist of cell death OS=Mus musculus GN=Bad PE=1 SV=1	BAD	0.517	0.668	0.573	1.964	1.475	1.827	0.637	0.927	0.639
F1RQ14	225	S	Uncharacterized protein	CD2-associated protein OS=Homo sapiens GN=CD2AP PE=1 SV=1	CD2-associated protein OS=Mus musculus GN=Cd2ap PE=1 SV=3	---	0.821	0.841		1.248	1.308		0.968	0.904				1.1422			0.879091			0.990603
F1RQ21	719	S	Uncharacterized protein	Antigen peptide transporter 2 OS=Homo sapiens GN=TAP2 PE=1 SV=1	Antigen peptide transporter 2 OS=Mus musculus GN=Tap2 PE=1 SV=1	LOC100519722	0.846			1.463			0.762				0.809977			1.2113			0.98773
F1RQ49	877	S	Uncharacterized protein	AF4/FMR2 family member 2 OS=Homo sapiens GN=AFF2 PE=1 SV=4	AF4/FMR2 family member 2 OS=Mus musculus GN=Aff2 PE=2 SV=2	AFF2	0.77	0.555	0.628	1.596	1.953	1.752	0.719	0.636	0.658
F1RQ73	551	S	Phospholipid-transporting ATPase			ATP11C	1.19		1.096	0.614		0.49	1.17		1.396	1.10492	1.12998		0.79474	0.798119		1.09187	1.0858		1.077			0.77258			1.07155			0.720992		0.717344		1.00509
F1RQ90	205	Y	Uncharacterized protein	RNA-binding motif protein, X chromosome OS=Homo sapiens GN=RBMX PE=1 SV=3	RNA binding motif protein, X-linked-like-1 OS=Mus musculus GN=Rbmxl1 PE=1 SV=1	RBMX	0.399			2.324			0.441			0.747941	0.8263	0.854236	1.38469	1.44559	1.26287	0.858383	0.725083	0.859853	0.533464			1.67836			0.513757			3.26683		3.14615		1.03836
F1RQ90	272	S	Uncharacterized protein	RNA-binding motif protein, X chromosome OS=Homo sapiens GN=RBMX PE=1 SV=3	RNA binding motif protein, X-linked-like-1 OS=Mus musculus GN=Rbmxl1 PE=1 SV=1	RBMX	0.659	0.731	0.656	1.696	1.771	1.671	0.736	0.625	0.707	0.747941	0.8263	0.854236	1.38469	1.44559	1.26287	0.858383	0.725083	0.859853	0.881085	0.884666	0.767938	1.22483	1.22511	1.32318	0.857426	0.86197	0.822234	1.48452	0.00265498	1.48918	0.00133784	0.996876	0.952695
F1RQ90	88	S	Uncharacterized protein	RNA-binding motif protein, X chromosome OS=Homo sapiens GN=RBMX PE=1 SV=3	RNA binding motif protein, X-linked-like-1 OS=Mus musculus GN=Rbmxl1 PE=1 SV=1	RBMX	0.626	0.344		2.044	2.386		0.469	0.476		0.747941	0.8263	0.854236	1.38469	1.44559	1.26287	0.858383	0.725083	0.859853	0.836964	0.416314		1.47615	1.65054		0.546376	0.656476		2.59939	0.0189079	2.49481	0.102765	1.04192	0.924722
F1RQ90	207	S	Uncharacterized protein	RNA-binding motif protein, X chromosome OS=Homo sapiens GN=RBMX PE=1 SV=3	RNA binding motif protein, X-linked-like-1 OS=Mus musculus GN=Rbmxl1 PE=1 SV=1	RBMX	0.49	0.489	0.454	2.103	2.084	2.074	0.544	0.59	0.52	0.747941	0.8263	0.854236	1.38469	1.44559	1.26287	0.858383	0.725083	0.859853	0.655132	0.591794	0.531469	1.51875	1.44163	1.64229	0.63375	0.8137	0.604755	2.2428	0.000672304	2.58811	0.000492279	0.866578	0.30534
F1RQ90	283	S	Uncharacterized protein	RNA-binding motif protein, X chromosome OS=Homo sapiens GN=RBMX PE=1 SV=3	RNA binding motif protein, X-linked-like-1 OS=Mus musculus GN=Rbmxl1 PE=1 SV=1	RBMX	0.564		0.435	1.885		1.906	0.661		0.691	0.747941	0.8263	0.854236	1.38469	1.44559	1.26287	0.858383	0.725083	0.859853	0.75407		0.509227	1.36132		1.50926	0.770053		0.803626	1.82412	0.0608041	2.27229	0.0459994	0.802767	0.422335
F1RQ90	351	S	Uncharacterized protein	RNA-binding motif protein, X chromosome OS=Homo sapiens GN=RBMX PE=1 SV=3	RNA binding motif protein, X-linked-like-1 OS=Mus musculus GN=Rbmxl1 PE=1 SV=1	RBMX	0.659	0.476	0.488	1.933	2.06	2.058	0.534	0.622	0.504	0.747941	0.8263	0.854236	1.38469	1.44559	1.26287	0.858383	0.725083	0.859853	0.881085	0.576062	0.571271	1.39598	1.42503	1.62962	0.6221	0.857832	0.586147	2.15414	0.00229476	2.19414	0.0042431	0.981771	0.929627
F1RQ90	58	S	Uncharacterized protein	RNA-binding motif protein, X chromosome OS=Homo sapiens GN=RBMX PE=1 SV=3	RNA binding motif protein, X-linked-like-1 OS=Mus musculus GN=Rbmxl1 PE=1 SV=1	RBMX	0.427	0.418	0.455	2.269	2.174	2.058	0.461	0.581	0.532	0.747941	0.8263	0.854236	1.38469	1.44559	1.26287	0.858383	0.725083	0.859853	0.5709	0.505869	0.53264	1.63864	1.50389	1.62962	0.537056	0.801287	0.618711	2.43843	0.00152581	2.96515	0.000365501	0.822363	0.273654
F1RQ90	325	S	Uncharacterized protein	RNA-binding motif protein, X chromosome OS=Homo sapiens GN=RBMX PE=1 SV=3	RNA binding motif protein, X-linked-like-1 OS=Mus musculus GN=Rbmxl1 PE=1 SV=1	RBMX	0.59	0.535		2.002	1.896		0.538	0.703		0.747941	0.8263	0.854236	1.38469	1.44559	1.26287	0.858383	0.725083	0.859853	0.788832	0.647464		1.44581	1.31158		0.62676	0.969544		1.72736	0.147353	1.91979	0.0212352	0.899764	0.725595
F1RQ91	223	S	40S ribosomal protein S4			RPS4X	0.845			1.324			0.881			1.14705	1.1286	1.18715	0.677476	0.748528	0.590094	1.133	1.06168	1.2153	0.736673			1.95431			0.777581			2.51332		2.65289		0.947392
F1RQB6	148	S	Uncharacterized protein	Ras GTPase-activating protein-binding protein 1 OS=Homo sapiens GN=G3BP1 PE=1 SV=1	Ras GTPase-activating protein-binding protein 1 OS=Mus musculus GN=G3bp1 PE=1 SV=1	G3BP1	0.602	0.615	0.658	1.815	1.815	1.743	0.685	0.695	0.639	0.89079	0.960495	0.963176	1.22905	1.14681	1.13948	0.833444	0.924593	0.87171	0.675805	0.640295	0.683157	1.47675	1.58265	1.52964	0.821891	0.751682	0.733042	1.98952	5.43727e-05	2.29538	0.000242987	0.866749	0.0444945
F1RQB6	230	S	Uncharacterized protein	Ras GTPase-activating protein-binding protein 1 OS=Homo sapiens GN=G3BP1 PE=1 SV=1	Ras GTPase-activating protein-binding protein 1 OS=Mus musculus GN=G3bp1 PE=1 SV=1	G3BP1	0.458	0.44	0.538	2.148	2.306	2.076	0.534	0.452	0.441	0.89079	0.960495	0.963176	1.22905	1.14681	1.13948	0.833444	0.924593	0.87171	0.51415	0.458097	0.558569	1.74769	2.0108	1.82188	0.640715	0.488864	0.505902	3.41207	0.000426005	3.64535	0.00125257	0.936004	0.574716
F1RQC5	387	T	Uncharacterized protein	La-related protein 1 OS=Homo sapiens GN=LARP1 PE=1 SV=2	La-related protein 1 OS=Mus musculus GN=Larp1 PE=1 SV=3	LARP1	0.787	0.667	0.89	1.613	1.792	1.53	0.688	0.666	0.623	0.825958	0.907822	0.756901	1.36195	1.26358	1.51498	0.827962	0.798396	0.709232	0.952832	0.734726	1.17585	1.18434	1.41819	1.00991	0.830956	0.834173	0.878415	1.42024	0.0924165	1.26159	0.224554	1.12575	0.491127
F1RQC5	712	S	Uncharacterized protein	La-related protein 1 OS=Homo sapiens GN=LARP1 PE=1 SV=2	La-related protein 1 OS=Mus musculus GN=Larp1 PE=1 SV=3	LARP1	0.545	0.434		2.006	2.26		0.575	0.495		0.825958	0.907822	0.756901	1.36195	1.26358	1.51498	0.827962	0.798396	0.709232	0.659839	0.478067		1.47289	1.78857		0.694477	0.619993		2.4812	0.0881468	2.8662	0.0460739	0.865677	0.50193
F1RQC5	492	S	Uncharacterized protein	La-related protein 1 OS=Homo sapiens GN=LARP1 PE=1 SV=2	La-related protein 1 OS=Mus musculus GN=Larp1 PE=1 SV=3	LARP1	0.537	0.464	0.582	1.995	2.136	1.874	0.592	0.571	0.586	0.825958	0.907822	0.756901	1.36195	1.26358	1.51498	0.827962	0.798396	0.709232	0.650154	0.511114	0.768925	1.46482	1.69044	1.23698	0.715009	0.715184	0.826246	1.94653	0.0250711	2.27554	0.01048	0.855415	0.284259
F1RQC5	488	S	Uncharacterized protein	La-related protein 1 OS=Homo sapiens GN=LARP1 PE=1 SV=2	La-related protein 1 OS=Mus musculus GN=Larp1 PE=1 SV=3	LARP1	0.504	0.403	0.489	2.023	2.343	2.071	0.599	0.457	0.491	0.825958	0.907822	0.756901	1.36195	1.26358	1.51498	0.827962	0.798396	0.709232	0.6102	0.44392	0.646055	1.48537	1.85426	1.36702	0.723463	0.572398	0.692299	2.36734	0.0178954	2.76833	0.0110594	0.85515	0.288259
F1RQC5	635	S	Uncharacterized protein	La-related protein 1 OS=Homo sapiens GN=LARP1 PE=1 SV=2	La-related protein 1 OS=Mus musculus GN=Larp1 PE=1 SV=3	LARP1	0.936			1.199			0.904			0.825958	0.907822	0.756901	1.36195	1.26358	1.51498	0.827962	0.798396	0.709232	1.13323			0.880358			1.09184			0.806308		0.776858		1.03791
F1RQC5	510	T	Uncharacterized protein	La-related protein 1 OS=Homo sapiens GN=LARP1 PE=1 SV=2	La-related protein 1 OS=Mus musculus GN=Larp1 PE=1 SV=3	LARP1	0.725	0.67	0.747	1.5	1.532	1.515	0.841	0.879	0.768	0.825958	0.907822	0.756901	1.36195	1.26358	1.51498	0.827962	0.798396	0.709232	0.877768	0.73803	0.986919	1.10137	1.21243	1.00001	1.01575	1.10096	1.08286	1.03571	0.611646	1.27321	0.0679584	0.813459	0.0965835
F1RQC5	382	S	Uncharacterized protein	La-related protein 1 OS=Homo sapiens GN=LARP1 PE=1 SV=2	La-related protein 1 OS=Mus musculus GN=Larp1 PE=1 SV=3	LARP1	0.583	0.5	0.562	1.811	1.963	1.793	0.707	0.68	0.68	0.825958	0.907822	0.756901	1.36195	1.26358	1.51498	0.827962	0.798396	0.709232	0.705847	0.550769	0.742501	1.32972	1.55352	1.18351	0.853904	0.851708	0.958784	1.52633	0.0383982	2.03428	0.0102246	0.750308	0.0423597
F1RQC5	378	S	Uncharacterized protein	La-related protein 1 OS=Homo sapiens GN=LARP1 PE=1 SV=2	La-related protein 1 OS=Mus musculus GN=Larp1 PE=1 SV=3	LARP1	0.494	0.458	0.596	2.135	2.163	1.947	0.513	0.553	0.507	0.825958	0.907822	0.756901	1.36195	1.26358	1.51498	0.827962	0.798396	0.709232	0.598093	0.504504	0.787421	1.56761	1.71181	1.28517	0.619594	0.692639	0.714858	2.25179	0.0172159	2.4151	0.0062493	0.93238	0.646622
F1RQC5	513	Y	Uncharacterized protein	La-related protein 1 OS=Homo sapiens GN=LARP1 PE=1 SV=2	La-related protein 1 OS=Mus musculus GN=Larp1 PE=1 SV=3	LARP1	0.551	0.557	0.639	1.958	1.943	1.783	0.611	0.644	0.62	0.825958	0.907822	0.756901	1.36195	1.26358	1.51498	0.827962	0.798396	0.709232	0.667104	0.613557	0.844232	1.43765	1.5377	1.17691	0.737957	0.806617	0.874185	1.71669	0.0224323	1.9541	0.00941837	0.878505	0.304411
F1RQE0	261	S	Uncharacterized protein			C9orf78	0.677	0.606	0.559	1.704	1.837	1.887	0.712	0.686	0.596			1.06811			1.18082			0.757879			0.523356			1.59804			0.786406	2.03208		3.05344		0.665504
F1RQE0	17	S	Uncharacterized protein			C9orf78	0.559	0.533	0.621	1.852	1.814	1.684	0.694	0.773	0.727			1.06811			1.18082			0.757879			0.581402			1.42612			0.959257	1.4867		2.4529		0.606097
F1RQE0	15	S	Uncharacterized protein			C9orf78	0.619	0.551	0.792	1.693	1.681	1.411	0.774	0.866	0.823			1.06811			1.18082			0.757879			0.741499			1.19493			1.08593	1.10038		1.6115		0.682826
F1RQE2	296	S	Uncharacterized protein	Formin-binding protein 1 OS=Homo sapiens GN=FNBP1 PE=1 SV=2	Formin-binding protein 1 OS=Mus musculus GN=Fnbp1 PE=1 SV=2	FNBP1	0.772		0.732	1.485		1.595	0.812		0.707	0.982473		0.925964	1.03136		1.11892	0.987335		0.949186	0.785773		0.790527	1.43985		1.42548	0.822416		0.744849	1.82824	0.0323605	1.81776	0.00302327	1.00576	0.926207
F1RQF6	234	S	Uncharacterized protein	Clathrin interactor 1 OS=Homo sapiens GN=CLINT1 PE=1 SV=1	Clathrin interactor 1 OS=Mus musculus GN=Clint1 PE=1 SV=2	CLINT1	0.857	0.927		1.352	1.142		0.847	0.962		0.825877	0.765755		1.41712	1.41837		0.828234	0.845641		1.03768	1.21057		0.954047	0.805148		1.02266	1.1376		0.814345	0.174753	0.782471	0.168101	1.04073	0.718239
F1RQF6	227	S	Uncharacterized protein	Clathrin interactor 1 OS=Homo sapiens GN=CLINT1 PE=1 SV=1	Clathrin interactor 1 OS=Mus musculus GN=Clint1 PE=1 SV=2	CLINT1	0.885		0.707	1.442		1.658	0.744		0.672	0.825877	0.765755		1.41712	1.41837		0.828234	0.845641		1.07159			1.01756			0.898297			1.13276		0.949577		1.19291
F1RQH1	19	T	Uncharacterized protein	ADP-ribosylation factor-like protein 6-interacting protein 6 OS=Homo sapiens GN=ARL6IP6 PE=1 SV=1	ADP-ribosylation factor-like protein 6-interacting protein 6 OS=Mus musculus GN=Arl6ip6 PE=1 SV=1	ARL6IP6	0.677	0.653	0.746	1.68	1.758	1.509	0.733	0.707	0.774
F1RQH2	787	S	Uncharacterized protein	Pre-mRNA-processing factor 40 homolog A OS=Homo sapiens GN=PRPF40A PE=1 SV=2	Pre-mRNA-processing factor 40 homolog A OS=Mus musculus GN=Prpf40a PE=1 SV=1	PRPF40A	0.696	0.625		1.67	1.757		0.723	0.734		1.00142	1.05528	1.05202	0.96934	0.934764	0.918784	1.01729	0.996008	1.01286	0.695014	0.592261		1.72282	1.87962		0.710711	0.736942		2.48847	0.0409964	2.7985	0.0109951	0.889215	0.351156
F1RQH2	883	S	Uncharacterized protein	Pre-mRNA-processing factor 40 homolog A OS=Homo sapiens GN=PRPF40A PE=1 SV=2	Pre-mRNA-processing factor 40 homolog A OS=Mus musculus GN=Prpf40a PE=1 SV=1	PRPF40A	0.628	0.453	0.649	1.656	2.029	1.619	0.798	0.669	0.761	1.00142	1.05528	1.05202	0.96934	0.934764	0.918784	1.01729	0.996008	1.01286	0.62711	0.429271	0.616911	1.70838	2.1706	1.76211	0.784437	0.671681	0.751341	2.55547	0.0125028	3.37125	0.00505265	0.758017	0.0909399
F1RQH2	862	S	Uncharacterized protein	Pre-mRNA-processing factor 40 homolog A OS=Homo sapiens GN=PRPF40A PE=1 SV=2	Pre-mRNA-processing factor 40 homolog A OS=Mus musculus GN=Prpf40a PE=1 SV=1	PRPF40A	0.624		0.742	1.672		1.527	0.787		0.762	1.00142	1.05528	1.05202	0.96934	0.934764	0.918784	1.01729	0.996008	1.01286	0.623116		0.705313	1.72489		1.66198	0.773624		0.752328	2.21951	0.0113405	2.54953	0.00340647	0.870557	0.234258
F1RQH2	758	T	Uncharacterized protein	Pre-mRNA-processing factor 40 homolog A OS=Homo sapiens GN=PRPF40A PE=1 SV=2	Pre-mRNA-processing factor 40 homolog A OS=Mus musculus GN=Prpf40a PE=1 SV=1	PRPF40A	0.788	0.819	0.903	1.188	1.183	1.205	1.049	1.028	0.911	1.00142	1.05528	1.05202	0.96934	0.934764	0.918784	1.01729	0.996008	1.01286	0.786883	0.776099	0.858352	1.22558	1.26556	1.31152	1.03117	1.03212	0.899437	1.2835	0.0101744	1.57048	0.000212901	0.817265	0.0342831
F1RQH2	933	S	Uncharacterized protein	Pre-mRNA-processing factor 40 homolog A OS=Homo sapiens GN=PRPF40A PE=1 SV=2	Pre-mRNA-processing factor 40 homolog A OS=Mus musculus GN=Prpf40a PE=1 SV=1	PRPF40A	0.478	0.458	0.525	2.129	2.187	1.976	0.533	0.532	0.545	1.00142	1.05528	1.05202	0.96934	0.934764	0.918784	1.01729	0.996008	1.01286	0.477323	0.434009	0.499042	2.19634	2.33963	2.15067	0.523941	0.534132	0.538083	4.18921	0.00106384	4.74104	0.000355905	0.883607	0.0772224
F1RQH2	888	S	Uncharacterized protein	Pre-mRNA-processing factor 40 homolog A OS=Homo sapiens GN=PRPF40A PE=1 SV=2	Pre-mRNA-processing factor 40 homolog A OS=Mus musculus GN=Prpf40a PE=1 SV=1	PRPF40A	0.819	0.798	0.788	1.282	1.35	1.35	0.941	0.909	0.884	1.00142	1.05528	1.05202	0.96934	0.934764	0.918784	1.01729	0.996008	1.01286	0.817839	0.756199	0.749038	1.32255	1.44421	1.46933	0.925006	0.912643	0.87278	1.56289	0.00399752	1.82349	0.00129026	0.857088	0.0109575
F1RQH2	938	S	Uncharacterized protein	Pre-mRNA-processing factor 40 homolog A OS=Homo sapiens GN=PRPF40A PE=1 SV=2	Pre-mRNA-processing factor 40 homolog A OS=Mus musculus GN=Prpf40a PE=1 SV=1	PRPF40A	0.55	0.434	0.466	1.974	2.205	2.059	0.598	0.541	0.522	1.00142	1.05528	1.05202	0.96934	0.934764	0.918784	1.01729	0.996008	1.01286	0.549221	0.411266	0.442959	2.03644	2.35888	2.24101	0.587836	0.543168	0.515374	4.03086	0.00217077	4.72859	0.000723579	0.852444	0.182905
F1RQH2	885	S	Uncharacterized protein	Pre-mRNA-processing factor 40 homolog A OS=Homo sapiens GN=PRPF40A PE=1 SV=2	Pre-mRNA-processing factor 40 homolog A OS=Mus musculus GN=Prpf40a PE=1 SV=1	PRPF40A	1.117	0.886	0.881	1.1	1.212	1.204	0.823	0.942	0.933	1.00142	1.05528	1.05202	0.96934	0.934764	0.918784	1.01729	0.996008	1.01286	1.11542	0.839589	0.83744	1.13479	1.29658	1.31043	0.809012	0.945775	0.921158	1.39831	0.00886281	1.33997	0.0542487	1.04354	0.729083
F1RQH8	1210	S	Uncharacterized protein	pre-mRNA 3' end processing protein WDR33 OS=Homo sapiens GN=WDR33 PE=1 SV=2	pre-mRNA 3' end processing protein WDR33 OS=Mus musculus GN=Wdr33 PE=1 SV=1	WDR33	0.637	0.569	0.493	1.801	1.812	2.042	0.666	0.74	0.513	0.992057	1.02899	1.02178	0.966261	0.86837	0.953359	0.942951	1.02118	1.00896	0.6421	0.552969	0.482492	1.86389	2.08667	2.1419	0.706294	0.724651	0.508442	3.14143	0.00028573	3.63173	0.0005267	0.864996	0.361418
F1RQJ0	434	S	Uncharacterized protein	Histone deacetylase complex subunit SAP130 OS=Homo sapiens GN=SAP130 PE=1 SV=1	Histone deacetylase complex subunit SAP130 OS=Mus musculus GN=Sap130 PE=1 SV=2	SAP130		0.576			1.872			0.685		0.965465	0.995991	1.08543	0.961591	1.03214	0.907852	1.01922	0.96905	1.01377		0.578318			1.8137			0.706878		2.56579		3.13616		0.818131
F1RQJ0	902	S	Uncharacterized protein	Histone deacetylase complex subunit SAP130 OS=Homo sapiens GN=SAP130 PE=1 SV=1	Histone deacetylase complex subunit SAP130 OS=Mus musculus GN=Sap130 PE=1 SV=2	SAP130	0.916	0.848		1.126	1.182		0.985	1.002		0.965465	0.995991	1.08543	0.961591	1.03214	0.907852	1.01922	0.96905	1.01377	0.948765	0.851413		1.17098	1.14519		0.966427	1.034		1.15783	0.1008	1.28663	0.100575	0.899896	0.248036
F1RQK4	1781	S	Uncharacterized protein	PH-interacting protein OS=Homo sapiens GN=PHIP PE=1 SV=2	PH-interacting protein OS=Mus musculus GN=Phip PE=1 SV=2	---	0.616			1.819			0.67			1.14486	1.08238	0.999937	0.722759	0.969232	0.835245	1.12122	0.945828	1.16404	0.538057			2.51675			0.597565			4.21167		4.67747		0.900416
F1RQK4	1455	S	Uncharacterized protein	PH-interacting protein OS=Homo sapiens GN=PHIP PE=1 SV=2	PH-interacting protein OS=Mus musculus GN=Phip PE=1 SV=2	---	0.982			1.214			0.849			1.14486	1.08238	0.999937	0.722759	0.969232	0.835245	1.12122	0.945828	1.16404	0.857746			1.67968			0.757213			2.21823		1.95824		1.13277
F1RQK4	1314	Y	Uncharacterized protein	PH-interacting protein OS=Homo sapiens GN=PHIP PE=1 SV=2	PH-interacting protein OS=Mus musculus GN=Phip PE=1 SV=2	---	0.301			2.584			0.307			1.14486	1.08238	0.999937	0.722759	0.969232	0.835245	1.12122	0.945828	1.16404	0.262914			3.57519			0.27381			13.0572		13.5983		0.960208
F1RQK4	1589	S	Uncharacterized protein	PH-interacting protein OS=Homo sapiens GN=PHIP PE=1 SV=2	PH-interacting protein OS=Mus musculus GN=Phip PE=1 SV=2	---	0.498			2.001			0.623			1.14486	1.08238	0.999937	0.722759	0.969232	0.835245	1.12122	0.945828	1.16404	0.434987			2.76856			0.555646			4.98259		6.36469		0.78285
F1RQK4	1280	S	Uncharacterized protein	PH-interacting protein OS=Homo sapiens GN=PHIP PE=1 SV=2	PH-interacting protein OS=Mus musculus GN=Phip PE=1 SV=2	---	0.819			1.526			0.733			1.14486	1.08238	0.999937	0.722759	0.969232	0.835245	1.12122	0.945828	1.16404	0.715371			2.11135			0.653754			3.22959		2.95141		1.09425
F1RQK4	908	S	Uncharacterized protein	PH-interacting protein OS=Homo sapiens GN=PHIP PE=1 SV=2	PH-interacting protein OS=Mus musculus GN=Phip PE=1 SV=2	---	0.485			2.103			0.549			1.14486	1.08238	0.999937	0.722759	0.969232	0.835245	1.12122	0.945828	1.16404	0.423632			2.90968			0.489646			5.94242		6.86842		0.86518
F1RQK4	136	S	Uncharacterized protein	PH-interacting protein OS=Homo sapiens GN=PHIP PE=1 SV=2	PH-interacting protein OS=Mus musculus GN=Phip PE=1 SV=2	---	0.66			1.717			0.717			1.14486	1.08238	0.999937	0.722759	0.969232	0.835245	1.12122	0.945828	1.16404	0.576489			2.37562			0.639484			3.7149		4.12084		0.901492
F1RQK4	1278	S	Uncharacterized protein	PH-interacting protein OS=Homo sapiens GN=PHIP PE=1 SV=2	PH-interacting protein OS=Mus musculus GN=Phip PE=1 SV=2	---	0.819			1.526			0.733			1.14486	1.08238	0.999937	0.722759	0.969232	0.835245	1.12122	0.945828	1.16404	0.715371			2.11135			0.653754			3.22959		2.95141		1.09425
F1RQK4	1313	S	Uncharacterized protein	PH-interacting protein OS=Homo sapiens GN=PHIP PE=1 SV=2	PH-interacting protein OS=Mus musculus GN=Phip PE=1 SV=2	---	0.348			2.438			0.389			1.14486	1.08238	0.999937	0.722759	0.969232	0.835245	1.12122	0.945828	1.16404	0.303967			3.37319			0.346944			9.72256		11.0972		0.876126
F1RQL8	1043	S	Uncharacterized protein	Inhibitor of Bruton tyrosine kinase OS=Homo sapiens GN=IBTK PE=1 SV=3	Inhibitor of Bruton tyrosine kinase OS=Mus musculus GN=Ibtk PE=1 SV=3	IBTK	0.547	0.637	0.584	2	1.828	1.891	0.579	0.664	0.57
F1RQM9	3993	T	Uncharacterized protein			KIAA1109	0.625	0.695		1.837	1.47		0.646	0.906		0.819382		0.942124	1.28657		1.01848	0.902945		1.03441	0.76277			1.42783			0.715437			1.99575		1.8719		1.06616
F1RQM9	1354	S	Uncharacterized protein			KIAA1109	0.49			1.984			0.646			0.819382		0.942124	1.28657		1.01848	0.902945		1.03441	0.598012			1.54209			0.715437			2.15545		2.57869		0.835869
F1RQM9	2601	S	Uncharacterized protein			KIAA1109			0.48			2.075			0.494	0.819382		0.942124	1.28657		1.01848	0.902945		1.03441			0.509487			2.03735			0.477566	4.26611		3.99882		1.06684
F1RQM9	2753	S	Uncharacterized protein			KIAA1109	0.675	0.656	0.589	1.789	1.614	1.83	0.641	0.823	0.623	0.819382		0.942124	1.28657		1.01848	0.902945		1.03441	0.823792		0.625183	1.39052		1.79679	0.709899		0.602274	2.42904	0.117142	2.1997	0.0994785	1.10426	0.621765
F1RQR0	87	Y	Uncharacterized protein	Splicing factor 1 OS=Homo sapiens GN=SF1 PE=1 SV=4	Splicing factor 1 OS=Mus musculus GN=Sf1 PE=1 SV=6	SF1	0.588			1.867			0.655			0.750558	0.789408	0.754648	1.43765	1.36389	1.39562	0.827636	0.891907	0.794155	0.783417			1.29865			0.791411			1.64093		1.65767		0.989899
F1RQR0	80	S	Uncharacterized protein	Splicing factor 1 OS=Homo sapiens GN=SF1 PE=1 SV=4	Splicing factor 1 OS=Mus musculus GN=Sf1 PE=1 SV=6	SF1	0.581	0.562	0.543	1.872	1.926	1.946	0.658	0.653	0.556	0.750558	0.789408	0.754648	1.43765	1.36389	1.39562	0.827636	0.891907	0.794155	0.774091	0.711926	0.71954	1.30212	1.41213	1.39436	0.795036	0.732139	0.700115	1.84467	0.000180169	1.86285	0.000363923	0.990242	0.84313
F1RQR0	82	S	Uncharacterized protein	Splicing factor 1 OS=Homo sapiens GN=SF1 PE=1 SV=4	Splicing factor 1 OS=Mus musculus GN=Sf1 PE=1 SV=6	SF1	0.587	0.565	0.545	1.856	1.923	1.94	0.665	0.653	0.56	0.750558	0.789408	0.754648	1.43765	1.36389	1.39562	0.827636	0.891907	0.794155	0.782085	0.715726	0.722191	1.291	1.40993	1.39006	0.803494	0.732139	0.705152	1.8257	0.000260724	1.84279	0.000487577	0.990725	0.858252
F1RQR2	543	S	Uncharacterized protein	Menin OS=Homo sapiens GN=MEN1 PE=1 SV=4	Menin OS=Mus musculus GN=Men1 PE=1 SV=2	MEN1	1.006		0.941	1.1		1.221	0.925		0.863
F1RQS3	14	S	Uncharacterized protein	Runt-related transcription factor 2 OS=Homo sapiens GN=RUNX2 PE=1 SV=2	Runt-related transcription factor 2 OS=Mus musculus GN=Runx2 PE=1 SV=2	---	0.967	1.055	1.042	0.818	0.519	0.777	1.201	1.358	1.181	1.09761			0.653615			1.22769			0.881009			1.2515			0.97826			1.27931		1.42053		0.900588
F1RQS5	425	T	Uncharacterized protein	Cell division cycle 5-like protein OS=Homo sapiens GN=CDC5L PE=1 SV=2	Cell division cycle 5-like protein OS=Mus musculus GN=Cdc5l PE=1 SV=2	CDC5L	0.661	0.505	0.738	1.767	1.973	1.575	0.674	0.667	0.721	1.10185	1.06108	1.05214	0.920201	0.944678	0.954947	0.957979	0.928961	0.942689	0.5999	0.475928	0.701428	1.92023	2.08854	1.64931	0.703565	0.718006	0.764833	2.58785	0.0107669	3.1836	0.00299222	0.812867	0.163982
F1RQS9	148	T	Uncharacterized protein	Sorting nexin-15 OS=Homo sapiens GN=SNX15 PE=1 SV=1	Sorting nexin-15 OS=Mus musculus GN=Snx15 PE=1 SV=1	SNX15	0.685		0.757	1.425		1.35	0.942		0.912	1.22447	0.982535	1.11818	0.543003	0.848487	0.659928	1.2129	1.14961	1.23066	0.559428		0.676995	2.6243		2.04568	0.776649		0.741067	3.07697	0.114458	3.777	0.0953162	0.81466	0.230296
F1RQT6	121	T	Uncharacterized protein	Vacuolar protein sorting-associated protein 51 homolog OS=Homo sapiens GN=VPS51 PE=1 SV=2	Vacuolar protein sorting-associated protein 51 homolog OS=Mus musculus GN=Vps51 PE=1 SV=2	VPS51	1.122			0.791			1.081			1.16025	0.996547	1.09618	0.748134	0.904708	0.80146	1.09421	1.08719	1.07147	0.96703			1.0573			0.987927			1.07022		1.09334		0.978848
F1RQU2	255	S	Uncharacterized protein	Heat shock protein HSP 90-beta OS=Homo sapiens GN=HSP90AB1 PE=1 SV=4	Heat shock protein HSP 90-beta OS=Mus musculus GN=Hsp90ab1 PE=1 SV=3	HSP90AB1	0.572	0.545	0.598	1.73	1.889	1.813	0.787	0.699	0.63	1.12288	1.11106	1.05945	0.791317	0.752278	0.957079	1.08066	1.10553	1.01076	0.509406	0.490525	0.564442	2.18623	2.51104	1.89431	0.728258	0.632275	0.623291	3.32266	0.0110488	4.21356	0.0102218	0.788564	0.0320806
F1RQU2	226	S	Uncharacterized protein	Heat shock protein HSP 90-beta OS=Homo sapiens GN=HSP90AB1 PE=1 SV=4	Heat shock protein HSP 90-beta OS=Mus musculus GN=Hsp90ab1 PE=1 SV=3	HSP90AB1	0.685	0.705	0.612	1.593	1.701	1.761	0.8	0.706	0.663	1.12288	1.11106	1.05945	0.791317	0.752278	0.957079	1.08066	1.10553	1.01076	0.61004	0.634532	0.577656	2.0131	2.26113	1.83997	0.740287	0.638607	0.655939	3.00477	0.00543951	3.35534	0.0064488	0.895517	0.138854
F1RQW4	892	S	Uncharacterized protein	Helicase SKI2W OS=Homo sapiens GN=SKIV2L PE=1 SV=3	Superkiller viralicidic activity 2-like 2 OS=Mus musculus GN=Skiv2l2 PE=1 SV=1	SKIV2L	0.923	1.094	1.04	0.87	0.506	0.862	1.197	1.332	1.104	1.18879	1.15187	1.11588	0.657034	0.680378	0.763632	1.17609	1.14838	1.13518	0.776423	0.94976	0.931997	1.32413	0.743705	1.12882	1.01778	1.15989	0.972532	1.01474	0.937891	1.20257	0.406144	0.843812	0.106066
F1RQW4	256	S	Uncharacterized protein	Helicase SKI2W OS=Homo sapiens GN=SKIV2L PE=1 SV=3	Superkiller viralicidic activity 2-like 2 OS=Mus musculus GN=Skiv2l2 PE=1 SV=1	SKIV2L	0.571	0.545	0.463	1.844	1.945	2.078	0.69	0.653	0.507	1.18879	1.15187	1.11588	0.657034	0.680378	0.763632	1.17609	1.14838	1.13518	0.480322	0.473144	0.414918	2.80655	2.85871	2.72121	0.58669	0.568626	0.446625	5.23519	3.12487e-06	6.12874	1.59373e-05	0.854204	0.21251
F1RQW9	238	S	Uncharacterized protein	Histone-lysine N-methyltransferase EHMT2 OS=Homo sapiens GN=EHMT2 PE=1 SV=3	Histone-lysine N-methyltransferase EHMT2 OS=Mus musculus GN=Ehmt2 PE=1 SV=2	EHMT2	0.504		0.518	2.136		1.982	0.503		0.546	1.0135	1.15473	1.02824	1.01479	0.990661	1.0438	1.00938	0.869441	0.922503	0.497287		0.503775	2.10486		1.89882	0.498328		0.591868	3.67244	0.0202768	3.99944	0.0434221	0.91824	0.514902
F1RQW9	523	T	Uncharacterized protein	Histone-lysine N-methyltransferase EHMT2 OS=Homo sapiens GN=EHMT2 PE=1 SV=3	Histone-lysine N-methyltransferase EHMT2 OS=Mus musculus GN=Ehmt2 PE=1 SV=2	EHMT2	0.645	0.653	0.704	1.819	1.757	1.779	0.643	0.708	0.564	1.0135	1.15473	1.02824	1.01479	0.990661	1.0438	1.00938	0.869441	0.922503	0.636408	0.565502	0.684667	1.79248	1.77356	1.70434	0.637027	0.814317	0.61138	2.55506	0.00106433	2.79362	2.25865e-05	0.914605	0.47629
F1RQW9	140	S	Uncharacterized protein	Histone-lysine N-methyltransferase EHMT2 OS=Homo sapiens GN=EHMT2 PE=1 SV=3	Histone-lysine N-methyltransferase EHMT2 OS=Mus musculus GN=Ehmt2 PE=1 SV=2	EHMT2	0.455	0.268	0.339	2.158	2.569	2.286	0.529	0.395	0.428	1.0135	1.15473	1.02824	1.01479	0.990661	1.0438	1.00938	0.869441	0.922503	0.448939	0.23209	0.32969	2.12654	2.59322	2.19007	0.524086	0.454315	0.463955	4.79065	0.00551517	6.83654	0.00183246	0.700742	0.137547
F1RQY4	412	S	Uncharacterized protein	Nucleolar transcription factor 1 OS=Homo sapiens GN=UBTF PE=1 SV=1	Nucleolar transcription factor 1 OS=Mus musculus GN=Ubtf PE=1 SV=1	UBTF	0.968			1.127			0.937			1.03872	1.13279	1.094	0.894244	0.903969	0.875793	1.04956	0.944768	1.01937	0.931917			1.26028			0.892752			1.41168		1.35235		1.04387
F1RQY4	389	S	Uncharacterized protein	Nucleolar transcription factor 1 OS=Homo sapiens GN=UBTF PE=1 SV=1	Nucleolar transcription factor 1 OS=Mus musculus GN=Ubtf PE=1 SV=1	UBTF	0.74	0.543	0.555	1.726	1.764	1.796	0.636	0.804	0.683	1.03872	1.13279	1.094	0.894244	0.903969	0.875793	1.04956	0.944768	1.01937	0.712416	0.479347	0.507311	1.93012	1.95139	2.05071	0.605966	0.851003	0.670022	2.78902	0.000634207	3.49145	0.000467447	0.798816	0.241491
F1RQZ1	38	S	Uncharacterized protein	G patch domain-containing protein 8 OS=Homo sapiens GN=GPATCH8 PE=1 SV=2	G patch domain-containing protein 8 OS=Mus musculus GN=Gpatch8 PE=1 SV=1	---	0.513	0.373	0.607	2.039	2.254	1.8	0.577	0.557	0.632	0.707611	0.717916		1.50297	1.44299		0.807137	0.867755		0.724975	0.519559		1.35665	1.56204		0.714872	0.641886		2.15122	0.0576436	2.3452	0.0288114	0.917285	0.682934
F1RQZ1	112	S	Uncharacterized protein	G patch domain-containing protein 8 OS=Homo sapiens GN=GPATCH8 PE=1 SV=2	G patch domain-containing protein 8 OS=Mus musculus GN=Gpatch8 PE=1 SV=1	---		0.764	0.674		1.73	1.721		0.627	0.644	0.707611	0.717916		1.50297	1.44299		0.807137	0.867755			1.06419			1.1989			0.722554		1.65926		1.12658		1.47282
F1RQZ1	17	S	Uncharacterized protein	G patch domain-containing protein 8 OS=Homo sapiens GN=GPATCH8 PE=1 SV=2	G patch domain-containing protein 8 OS=Mus musculus GN=Gpatch8 PE=1 SV=1	---	0.723	0.708	0.772	1.607	1.566	1.471	0.752	0.814	0.786	0.707611	0.717916		1.50297	1.44299		0.807137	0.867755		1.02175	0.986188		1.06922	1.08525		0.931688	0.938052		1.15228	0.0177539	1.07297	0.108946	1.07391	0.150969
F1RQZ1	12	S	Uncharacterized protein	G patch domain-containing protein 8 OS=Homo sapiens GN=GPATCH8 PE=1 SV=2	G patch domain-containing protein 8 OS=Mus musculus GN=Gpatch8 PE=1 SV=1	---	0.627	0.48	0.584	1.773	2.024	1.755	0.697	0.647	0.695	0.707611	0.717916		1.50297	1.44299		0.807137	0.867755		0.88608	0.668602		1.17966	1.40265		0.863546	0.745602		1.60477	0.0928213	1.66099	0.0809499	0.966152	0.851355
F1RR03	410	S	Kinesin-like protein			KIF18B	0.605	0.601	0.654	1.837	1.844	1.654	0.665	0.684	0.724
F1RR03	647	S	Kinesin-like protein			KIF18B	0.56	0.637	0.581	2.063	1.767	1.987	0.513	0.715	0.483
F1RR06	47	S	Glycylpeptide N-tetradecanoyltransferase			NMT1	0.353	0.418	0.425	2.342	2.288	2.192	0.466	0.487	0.437	1.066	0.968966	0.921858	0.895291	1.02741	1.01368	1.05408	1.03267	1.04842	0.331144	0.431388	0.461026	2.61591	2.22696	2.16241	0.442093	0.471592	0.416819	5.26513	0.00511084	5.72534	0.00324013	0.919619	0.469622
F1RR16	166	S	Uncharacterized protein	ATPase family AAA domain-containing protein 2 OS=Homo sapiens GN=ATAD2 PE=1 SV=1	ATPase family AAA domain-containing protein 2 OS=Mus musculus GN=Atad2 PE=1 SV=1	ATAD2	0.758		0.678	1.601		1.625	0.725		0.73	0.801932	0.770141	0.768469	1.50128	1.65823	1.43451	0.649225	0.637415	0.814597	0.945218		0.882274	1.06642		1.13279	1.11672		0.896149	1.09258	0.549553	1.20341	0.0558111	0.907905	0.55144
F1RR16	332	S	Uncharacterized protein	ATPase family AAA domain-containing protein 2 OS=Homo sapiens GN=ATAD2 PE=1 SV=1	ATPase family AAA domain-containing protein 2 OS=Mus musculus GN=Atad2 PE=1 SV=1	ATAD2	0.643			1.637			0.8			0.801932	0.770141	0.768469	1.50128	1.65823	1.43451	0.649225	0.637415	0.814597	0.801814			1.0904			1.23224			0.884896		1.35992		0.650697
F1RR16	323	S	Uncharacterized protein	ATPase family AAA domain-containing protein 2 OS=Homo sapiens GN=ATAD2 PE=1 SV=1	ATPase family AAA domain-containing protein 2 OS=Mus musculus GN=Atad2 PE=1 SV=1	ATAD2	0.623	0.647	0.622	1.9	1.771	1.656	0.595	0.702	0.753	0.801932	0.770141	0.768469	1.50128	1.65823	1.43451	0.649225	0.637415	0.814597	0.776874	0.840106	0.809402	1.26559	1.06801	1.1544	0.916477	1.10132	0.924384	1.18551	0.0940468	1.43753	0.0176299	0.824687	0.0937173
F1RR16	41	S	Uncharacterized protein	ATPase family AAA domain-containing protein 2 OS=Homo sapiens GN=ATAD2 PE=1 SV=1	ATPase family AAA domain-containing protein 2 OS=Mus musculus GN=Atad2 PE=1 SV=1	ATAD2	0.764			1.651			0.678			0.801932	0.770141	0.768469	1.50128	1.65823	1.43451	0.649225	0.637415	0.814597	0.9527			1.09973			1.04432			1.05306		1.15433		0.912266
F1RR19	52	S	Uncharacterized protein	Protein HEXIM1 OS=Homo sapiens GN=HEXIM1 PE=1 SV=1	Protein HEXIM1 OS=Mus musculus GN=Hexim1 PE=1 SV=1	HEXIM1	0.403		0.23	2.297		2.486	0.459		0.343	0.687824	0.697621	0.7104	1.60654	1.5648	1.544	0.760252	0.836391	0.756348	0.585906		0.323761	1.42978		1.6101	0.603747		0.453495	2.87529	0.0151009	3.34175	0.0291179	0.860415	0.684051
F1RR20	36	S	Uncharacterized protein	Protein HEXIM2 OS=Homo sapiens GN=HEXIM2 PE=1 SV=1	Protein HEXIM2 OS=Mus musculus GN=Hexim2 PE=1 SV=1	HEXIM2	0.396	0.266	0.45	2.284	2.579	2.124	0.477	0.388	0.476	0.656398	0.70817	0.859675	1.60865	1.5619	1.13098	0.757266	0.771824	0.997665	0.603292	0.375616	0.523454	1.41982	1.6512	1.87801	0.629897	0.502705	0.477114	3.07447	0.00781201	3.29417	0.00470161	0.933308	0.686455
F1RR22	1038	S	Uncharacterized protein	Formin-like protein 2 OS=Homo sapiens GN=FMNL2 PE=1 SV=3	Formin-like protein 1 OS=Mus musculus GN=Fmnl1 PE=1 SV=1	FMNL1	1.178	1.312	1.351	0.852	0.691	0.702	0.978	0.977	0.968		1.33025			0.490798			1.14651			0.986279			1.40791			0.85215		1.65219		1.4275		1.1574
F1RR22	184	S	Uncharacterized protein	Formin-like protein 2 OS=Homo sapiens GN=FMNL2 PE=1 SV=3	Formin-like protein 1 OS=Mus musculus GN=Fmnl1 PE=1 SV=1	FMNL1	1.2		1.293	0.654		0.778	1.126		0.951		1.33025			0.490798			1.14651
F1RR44	16	T	Serine/threonine-protein phosphatase 2A activator			PTPA		0.688			1.607			0.799		0.966205	0.928164	0.908886	1.18043	1.00581	1.09646	0.90166	1.0278	0.948239		0.741248			1.59772			0.77739		2.05523		2.15544		0.953509
F1RR47	276	S	Uncharacterized protein	Mitoguardin 2 OS=Homo sapiens GN=MIGA2 PE=1 SV=1	Mitoguardin 2 OS=Mus musculus GN=Miga2 PE=1 SV=1	MIGA2	0.789	0.549	0.917	1.59	1.838	1.364	0.706	0.738	0.753
F1RR49	1719	S	Uncharacterized protein	Nucleoporin NUP188 homolog OS=Homo sapiens GN=NUP188 PE=1 SV=1	Nucleoporin NUP188 homolog OS=Mus musculus GN=Nup188 PE=1 SV=2	NUP188	0.827		0.825	1.355		1.288	0.872		0.906	1.09412	1.1227	1.11464	0.811714	0.787169	0.818873	1.07886	1.07351	1.07602	0.755861		0.740152	1.66931		1.57289	0.808263		0.841992	1.96467	0.0224253	2.16723	0.0308695	0.906535	0.0933616
F1RR49	1711	S	Uncharacterized protein	Nucleoporin NUP188 homolog OS=Homo sapiens GN=NUP188 PE=1 SV=1	Nucleoporin NUP188 homolog OS=Mus musculus GN=Nup188 PE=1 SV=2	NUP188	0.796	0.896	0.805	1.44	1.262	1.379	0.827	0.892	0.841	1.09412	1.1227	1.11464	0.811714	0.787169	0.818873	1.07886	1.07351	1.07602	0.727528	0.798073	0.722209	1.77402	1.60321	1.68402	0.766552	0.830921	0.781584	2.12742	0.000984822	2.25164	0.000508331	0.944832	0.237357
F1RR54	215	S	Uncharacterized protein	Pre-mRNA-splicing factor SLU7 OS=Homo sapiens GN=SLU7 PE=1 SV=2	Pre-mRNA-splicing factor SLU7 OS=Mus musculus GN=Slu7 PE=1 SV=1	SLU7	0.675	0.618	0.734	1.658	1.62	1.521	0.754	0.853	0.775	0.773919		1.1856	1.45318		0.791111	0.792067		1.03857	0.872184		0.619096	1.14095		1.92261	0.951939		0.746218	1.80405	0.317225	2.05431	0.272012	0.878176	0.593114
F1RR78	1197	S	Uncharacterized protein	Spectrin alpha chain, non-erythrocytic 1 OS=Homo sapiens GN=SPTAN1 PE=1 SV=3	Spectrin alpha chain, non-erythrocytic 1 OS=Mus musculus GN=Sptan1 PE=1 SV=4	SPTAN1	0.582	0.567	0.518	1.869	1.844	1.903	0.659	0.717	0.619	0.810289	0.791536	0.774292	1.32431	1.29532	1.44066	0.860923	0.925404	0.785915	0.718262	0.716329	0.668998	1.4113	1.42359	1.32093	0.765457	0.774796	0.787616	1.78525	0.00205229	1.97559	0.000369327	0.903654	0.0300956
F1RR80	88	S	Uncharacterized protein	Nucleoporin GLE1 OS=Homo sapiens GN=GLE1 PE=1 SV=2	Nucleoporin GLE1 OS=Mus musculus GN=Gle1 PE=1 SV=2	GLE1	0.753	0.779	0.755	1.501	1.441	1.488	0.815	0.852	0.786	1.05742	1.0419	1.08263	0.967944	0.942985	0.935378	1.01136	1.024	1.08357	0.712108	0.747669	0.697378	1.55071	1.52813	1.5908	0.805847	0.83203	0.725378	1.97593	0.000166309	2.16472	5.60994e-06	0.91279	0.153149
F1RR85	294	S	Uncharacterized protein	Long-chain fatty acid transport protein 4 OS=Homo sapiens GN=SLC27A4 PE=1 SV=1	Long-chain fatty acid transport protein 4 OS=Mus musculus GN=Slc27a4 PE=1 SV=1	SLC27A4	0.62			1.666			0.798			0.930331	0.947888	0.90068	1.04953	1.06167	0.975672	1.01838	0.993351	1.11484	0.66643			1.58738			0.783595			2.02576		2.38191		0.850477
F1RRA7	577	T	Uncharacterized protein	Heat shock 70 kDa protein 4L OS=Homo sapiens GN=HSPA4L PE=1 SV=3	Heat shock 70 kDa protein 4L OS=Mus musculus GN=Hspa4l PE=1 SV=2	HSPA4L	0.522		0.465	2.046		2.117	0.563		0.47	1.20365	1.18717	1.09373	0.637088	0.650081	0.79289	1.12778	1.1279	1.1091	0.433681		0.42515	3.21149		2.66998	0.499212		0.423767	6.37226	0.0646729	6.84822	0.0683112	0.930499	0.550538
F1RRB5	89	S	Uncharacterized protein	Protein Jade-1 OS=Homo sapiens GN=JADE1 PE=1 SV=1	Protein Jade-1 OS=Mus musculus GN=Jade1 PE=1 SV=2	JADE1	0.764	0.705	0.894	1.382	1.511	1.288	0.906	0.863	0.844
F1RRC2	93	S	Uncharacterized protein	Golgin subfamily A member 4 OS=Homo sapiens GN=GOLGA4 PE=1 SV=1	Golgin subfamily A member 4 OS=Mus musculus GN=Golga4 PE=1 SV=2	GOLGA4	0.8		1.067	1.115		0.877	1.1		1.066	1.05676	0.965237	0.979839	0.98533	0.989216	0.858217	1.00599	1.04135	1.08332	0.757032		1.08895	1.1316		1.02189	1.09345		0.984013	1.0366	0.67225	1.16658	0.518579	0.888578	0.610948
F1RRC8	95	S	Uncharacterized protein	ETS-related transcription factor Elf-2 OS=Homo sapiens GN=ELF2 PE=1 SV=2	ETS-related transcription factor Elf-2 OS=Mus musculus GN=Elf2 PE=1 SV=1	---	0.859	0.716	0.737	1.337	1.502	1.434	0.856	0.859	0.852	0.875114	1.00807	1.08449	1.19879	1.06324	0.867517	0.932297	0.936844	1.05477	0.981587	0.710267	0.679581	1.11529	1.41267	1.65299	0.918162	0.916908	0.807757	1.582	0.0739495	1.76305	0.0392338	0.89731	0.452986
F1RRC8	156	S	Uncharacterized protein	ETS-related transcription factor Elf-2 OS=Homo sapiens GN=ELF2 PE=1 SV=2	ETS-related transcription factor Elf-2 OS=Mus musculus GN=Elf2 PE=1 SV=1	---	0.765	0.744		1.518	1.613		0.789	0.743		0.875114	1.00807	1.08449	1.19879	1.06324	0.867517	0.932297	0.936844	1.05477	0.874172	0.738043		1.26627	1.51707		0.846296	0.793088		1.6978	0.124774	1.72641	0.0830471	0.983427	0.877309
F1RRE0	162	S	Uncharacterized protein	Cytoplasmic dynein 1 light intermediate chain 1 OS=Homo sapiens GN=DYNC1LI1 PE=1 SV=3	Cytoplasmic dynein 1 light intermediate chain 1 OS=Mus musculus GN=Dync1li1 PE=1 SV=1	DYNC1LI1	0.675	0.625	0.672	1.73	1.837	1.649	0.692	0.668	0.713	1.13404	1.13142	1.11476	0.739907	0.742511	0.799979	1.11542	1.13731	1.1034	0.595218	0.552404	0.602823	2.33813	2.47404	2.06131	0.620393	0.587348	0.646186	3.70752	0.00456885	3.9267	0.00447039	0.944182	0.211029
F1RRF2	510	Y	Uncharacterized protein	Dolichyl-diphosphooligosaccharide--protein glycosyltransferase subunit STT3B OS=Homo sapiens GN=STT3B PE=1 SV=1	Dolichyl-diphosphooligosaccharide--protein glycosyltransferase subunit STT3B OS=Mus musculus GN=Stt3b PE=1 SV=2	STT3B	0.667	0.703		1.475	1.531		0.916	0.848		0.902233	0.887091	0.956871	1.15879	1.25733	1.01363	0.959327	0.894951	1.02935	0.739277	0.792478		1.27288	1.21766		0.954836	0.947538		1.30917	0.0557377	1.62594	0.00636749	0.805181	0.0857944
F1RRF2	498	S	Uncharacterized protein	Dolichyl-diphosphooligosaccharide--protein glycosyltransferase subunit STT3B OS=Homo sapiens GN=STT3B PE=1 SV=1	Dolichyl-diphosphooligosaccharide--protein glycosyltransferase subunit STT3B OS=Mus musculus GN=Stt3b PE=1 SV=2	STT3B	0.769	0.737	0.757	1.385	1.575	1.363	0.899	0.781	0.899	0.902233	0.887091	0.956871	1.15879	1.25733	1.01363	0.959327	0.894951	1.02935	0.852329	0.830805	0.79112	1.19521	1.25266	1.34467	0.937115	0.872673	0.87337	1.41346	0.00519675	1.5328	0.00417656	0.922143	0.0688786
F1RRF2	497	S	Uncharacterized protein	Dolichyl-diphosphooligosaccharide--protein glycosyltransferase subunit STT3B OS=Homo sapiens GN=STT3B PE=1 SV=1	Dolichyl-diphosphooligosaccharide--protein glycosyltransferase subunit STT3B OS=Mus musculus GN=Stt3b PE=1 SV=2	STT3B	0.763	0.74	0.706	1.401	1.542	1.468	0.891	0.805	0.848	0.902233	0.887091	0.956871	1.15879	1.25733	1.01363	0.959327	0.894951	1.02935	0.845679	0.834187	0.737822	1.20902	1.22641	1.44826	0.928776	0.899491	0.823824	1.46439	0.0213329	1.60636	0.0128034	0.911616	0.167611
F1RRF2	29	S	Uncharacterized protein	Dolichyl-diphosphooligosaccharide--protein glycosyltransferase subunit STT3B OS=Homo sapiens GN=STT3B PE=1 SV=1	Dolichyl-diphosphooligosaccharide--protein glycosyltransferase subunit STT3B OS=Mus musculus GN=Stt3b PE=1 SV=2	STT3B	0.721			1.428			0.906			0.902233	0.887091	0.956871	1.15879	1.25733	1.01363	0.959327	0.894951	1.02935	0.799128			1.23232			0.944412			1.30485		1.54208		0.846165
F1RRG9	116	S	Uncharacterized protein	SWI/SNF-related matrix-associated actin-dependent regulator of chromatin subfamily A member 5 OS=Homo sapiens GN=SMARCA5 PE=1 SV=1	SWI/SNF-related matrix-associated actin-dependent regulator of chromatin subfamily A member 5 OS=Mus musculus GN=Smarca5 PE=1 SV=1	SMARCA5	0.38			2.347			0.437			1.04023	1.06667	1.02206	0.900687	0.923239	0.939589	1.04705	1.01136	1.04184	0.365304			2.60579			0.417363			6.24345		7.13321		0.875266
F1RRG9	66	S	Uncharacterized protein	SWI/SNF-related matrix-associated actin-dependent regulator of chromatin subfamily A member 5 OS=Homo sapiens GN=SMARCA5 PE=1 SV=1	SWI/SNF-related matrix-associated actin-dependent regulator of chromatin subfamily A member 5 OS=Mus musculus GN=Smarca5 PE=1 SV=1	SMARCA5	0.722	0.654	0.739	1.606	1.713	1.543	0.754	0.743	0.75	1.04023	1.06667	1.02206	0.900687	0.923239	0.939589	1.04705	1.01136	1.04184	0.694078	0.613121	0.72305	1.78308	1.85542	1.64221	0.720119	0.734653	0.719879	2.42831	0.00347123	2.60102	0.000575636	0.933598	0.279772
F1RRG9	113	T	Uncharacterized protein	SWI/SNF-related matrix-associated actin-dependent regulator of chromatin subfamily A member 5 OS=Homo sapiens GN=SMARCA5 PE=1 SV=1	SWI/SNF-related matrix-associated actin-dependent regulator of chromatin subfamily A member 5 OS=Mus musculus GN=Smarca5 PE=1 SV=1	SMARCA5	0.38			2.347			0.437			1.04023	1.06667	1.02206	0.900687	0.923239	0.939589	1.04705	1.01136	1.04184	0.365304			2.60579			0.417363			6.24345		7.13321		0.875266
F1RRH2	247	S	Anion exchange protein			SLC4A7	0.741	0.661	0.915	1.488	1.8	1.241	0.838	0.665	0.868	1.2317		1.25917	0.664172		0.517744	1.09542		1.24353	0.601606		0.72667	2.24038		2.39694	0.765005		0.69801	3.1697	0.0134475	3.49123	0.00446299	0.907903	0.467653
F1RRH5	102	S	Uncharacterized protein	MAD2L1-binding protein OS=Homo sapiens GN=MAD2L1BP PE=1 SV=1	MAD2L1-binding protein OS=Mus musculus GN=Mad2l1bp PE=1 SV=2	MAD2L1BP	0.946	0.917	0.872	1.171	1.24	1.286	0.919	0.891	0.865
F1RRH9	142	S	Uncharacterized protein	Zinc finger protein ubi-d4 OS=Homo sapiens GN=DPF2 PE=1 SV=2	Zinc finger protein ubi-d4 OS=Mus musculus GN=Dpf2 PE=1 SV=1	DPF2										0.817415	0.903354	0.922438	1.24362	1.25021	1.18221	0.912329	0.898242	0.926602
F1RRI2	405	S	Uncharacterized protein	FERM domain-containing protein 8 OS=Homo sapiens GN=FRMD8 PE=1 SV=1	FERM domain-containing protein 8 OS=Mus musculus GN=Frmd8 PE=1 SV=2	FRMD8	1.164	1.065	1.007	0.783	0.474	1.046	1.049	1.385	0.963	1.05941	1.05437	1.1238	0.740873	0.891698	0.827252	1.03208	1.0329	1.05898	1.09873	1.01008	0.896066	1.05686	0.53157	1.26443	1.01639	1.34088	0.909363	0.873332	0.621763	0.94941	0.84094	0.919868	0.586375
F1RRJ1	421	T	Uncharacterized protein	Tight junction-associated protein 1 OS=Homo sapiens GN=TJAP1 PE=1 SV=1	Tight junction-associated protein 1 OS=Mus musculus GN=Tjap1 PE=1 SV=1	---	0.583			1.85			0.674
F1RRJ1	299	S	Uncharacterized protein	Tight junction-associated protein 1 OS=Homo sapiens GN=TJAP1 PE=1 SV=1	Tight junction-associated protein 1 OS=Mus musculus GN=Tjap1 PE=1 SV=1	---	0.465	0.459	0.415	2.145	2.175	2.225	0.531	0.542	0.416
F1RRJ4	263	S	Uncharacterized protein	DNA-directed RNA polymerases I and III subunit RPAC1 OS=Homo sapiens GN=POLR1C PE=1 SV=1	DNA-directed RNA polymerases I and III subunit RPAC1 OS=Mus musculus GN=Polr1c PE=1 SV=3	POLR1C	0.805	0.819	0.891	1.451	1.21	1.173	0.81	1.005	0.953	1.12254	1.19627	1.11307	0.841025	0.801017	0.843427	1.03342	1.04904	1.05928	0.717126	0.684627	0.800488	1.72528	1.51058	1.39075	0.783806	0.958018	0.899665	1.75152	0.00914664	2.10086	0.00827968	0.833712	0.0858334
F1RRK1	370	T	Uncharacterized protein	Pecanex-like protein 3 OS=Homo sapiens GN=PCNX3 PE=1 SV=2	Pecanex-like protein 3 OS=Mus musculus GN=Pcnx3 PE=1 SV=2	PCNX3	0.688			1.7			0.704
F1RRK2	128	S	Uncharacterized protein	Signal-induced proliferation-associated protein 1 OS=Homo sapiens GN=SIPA1 PE=1 SV=1	Signal-induced proliferation-associated protein 1 OS=Mus musculus GN=Sipa1 PE=1 SV=2	LOC100517325	0.904	0.855	0.903	0.983	1.091	1.089	1.117	1.07	1.019		0.954101	0.980812		1.14998	1.28223		0.909785	0.736593		0.896131	0.920665		0.948709	0.849301		1.1761	1.3834	0.702485	0.123125	0.989659	0.881925	0.709825	0.16903
F1RRK2	121	S	Uncharacterized protein	Signal-induced proliferation-associated protein 1 OS=Homo sapiens GN=SIPA1 PE=1 SV=1	Signal-induced proliferation-associated protein 1 OS=Mus musculus GN=Sipa1 PE=1 SV=2	LOC100517325	0.879	0.813	0.932	1.16	1.319	1.199	0.991	0.92	0.89		0.954101	0.980812		1.14998	1.28223		0.909785	0.736593		0.852111	0.950233		1.14697	0.935088		1.01123	1.20827	0.93808	0.681833	1.1552	0.394423	0.812052	0.2424
F1RRK9	1190	S	Uncharacterized protein	Exportin-5 OS=Homo sapiens GN=XPO5 PE=1 SV=1	Exportin-5 OS=Mus musculus GN=Xpo5 PE=1 SV=1	XPO5	0.751			1.509			0.812			1.32994	1.24158	1.20851	0.450629	0.614218	0.6259	1.1911	1.09792	1.1637	0.564688			3.34866			0.68172			4.91207		5.9301		0.828327
F1RRK9	428	S	Uncharacterized protein	Exportin-5 OS=Homo sapiens GN=XPO5 PE=1 SV=1	Exportin-5 OS=Mus musculus GN=Xpo5 PE=1 SV=1	XPO5	0.682			1.454			0.921			1.32994	1.24158	1.20851	0.450629	0.614218	0.6259	1.1911	1.09792	1.1637	0.512806			3.2266			0.773232			4.17288		6.29206		0.663198
F1RRK9	827	S	Uncharacterized protein	Exportin-5 OS=Homo sapiens GN=XPO5 PE=1 SV=1	Exportin-5 OS=Mus musculus GN=Xpo5 PE=1 SV=1	XPO5	0.965	0.964		1.001	1.014		1.046	1.032		1.32994	1.24158	1.20851	0.450629	0.614218	0.6259	1.1911	1.09792	1.1637	0.725597	0.776433		2.22134	1.65088		0.878177	0.939963		2.12977	0.168885	2.57799	0.14794	0.826136	0.0620644
F1RRM3	1621	S	Uncharacterized protein	Zinc finger protein 318 OS=Homo sapiens GN=ZNF318 PE=1 SV=2	Zinc finger protein 318 (Fragment) OS=Mus musculus GN=Znf318 PE=1 SV=2	ZNF318	0.537	0.541	0.46	1.952	1.956	2.06	0.629	0.647	0.526	0.871195		0.938309	1.16314		1.04155	0.968507		1.01493	0.616395		0.490244	1.67822		1.97783	0.649453		0.51826	3.13095	0.0437236	3.30374	0.0438503	0.947697	0.769174
F1RRM3	1233	S	Uncharacterized protein	Zinc finger protein 318 OS=Homo sapiens GN=ZNF318 PE=1 SV=2	Zinc finger protein 318 (Fragment) OS=Mus musculus GN=Znf318 PE=1 SV=2	ZNF318	0.865		0.731	1.4		1.584	0.8		0.719	0.871195		0.938309	1.16314		1.04155	0.968507		1.01493	0.99289		0.779061	1.20364		1.52081	0.826014		0.70842	1.77555	0.132999	1.53755	0.14771	1.15479	0.457163
F1RRM3	2084	T	Uncharacterized protein	Zinc finger protein 318 OS=Homo sapiens GN=ZNF318 PE=1 SV=2	Zinc finger protein 318 (Fragment) OS=Mus musculus GN=Znf318 PE=1 SV=2	ZNF318										0.871195		0.938309	1.16314		1.04155	0.968507		1.01493
F1RRM3	79	S	Uncharacterized protein	Zinc finger protein 318 OS=Homo sapiens GN=ZNF318 PE=1 SV=2	Zinc finger protein 318 (Fragment) OS=Mus musculus GN=Znf318 PE=1 SV=2	ZNF318										0.871195		0.938309	1.16314		1.04155	0.968507		1.01493
F1RRM3	698	S	Uncharacterized protein	Zinc finger protein 318 OS=Homo sapiens GN=ZNF318 PE=1 SV=2	Zinc finger protein 318 (Fragment) OS=Mus musculus GN=Znf318 PE=1 SV=2	ZNF318	0.81	0.662	0.743	1.505	1.675	1.462	0.759	0.766	0.822	0.871195		0.938309	1.16314		1.04155	0.968507		1.01493	0.929758		0.79185	1.29392		1.40368	0.783681		0.809904	1.69279	0.0513105	1.56691	0.034636	1.08034	0.520886
F1RRM3	1409	S	Uncharacterized protein	Zinc finger protein 318 OS=Homo sapiens GN=ZNF318 PE=1 SV=2	Zinc finger protein 318 (Fragment) OS=Mus musculus GN=Znf318 PE=1 SV=2	ZNF318	0.632	0.566	0.674	1.806	1.845	1.669	0.665	0.717	0.693	0.871195		0.938309	1.16314		1.04155	0.968507		1.01493	0.725441		0.718314	1.5527		1.60242	0.686624		0.682802	2.30397	0.0170792	2.18536	0.0162986	1.05428	0.025383
F1RRM7	117	S	2'-deoxynucleoside 5'-phosphate N-hydrolase 1			DNPH1	0.691			1.443			0.921
F1RRM9	228	S	Uncharacterized protein	Serum response factor OS=Homo sapiens GN=SRF PE=1 SV=1	Serum response factor OS=Mus musculus GN=Srf PE=1 SV=1	SRF	0.731	0.799	0.755	1.678	1.42	1.546	0.685	0.851	0.732		1.16887			0.867102			0.962509			0.683569			1.63764			0.884148		1.85222		2.39572		0.773138
F1RRN1	457	S	Uncharacterized protein	Kinesin light chain 4 OS=Homo sapiens GN=KLC4 PE=1 SV=3	Kinesin light chain 4 OS=Mus musculus GN=Klc4 PE=1 SV=1	KLC4	0.627			1.78			0.693			1.12522	1.12715	1.09543	0.737097	0.8287	0.792849	1.11112	1.08224	1.10307	0.557223			2.41488			0.623693			3.8719		4.33378		0.893424
F1RRQ5	442	S	Uncharacterized protein	Pleckstrin homology domain-containing family M member 1 OS=Homo sapiens GN=PLEKHM1 PE=1 SV=3	Pleckstrin homology domain-containing family M member 1 OS=Mus musculus GN=Plekhm1 PE=1 SV=1	PLEKHM1	1.133			1.324			0.617
F1RRS8	733	S	Microtubule-associated protein			MAPT	0.74		0.621	1.382		1.575	0.928		0.828
F1RRS8	737	S	Microtubule-associated protein			MAPT	0.74		0.621	1.382		1.575	0.928		0.828
F1RRS9	993	S	Uncharacterized protein	KAT8 regulatory NSL complex subunit 1 OS=Homo sapiens GN=KANSL1 PE=1 SV=2	KAT8 regulatory NSL complex subunit 1 OS=Mus musculus GN=Kansl1 PE=1 SV=1	KANSL1	0.727			1.66			0.703
F1RRS9	1081	S	Uncharacterized protein	KAT8 regulatory NSL complex subunit 1 OS=Homo sapiens GN=KANSL1 PE=1 SV=2	KAT8 regulatory NSL complex subunit 1 OS=Mus musculus GN=Kansl1 PE=1 SV=1	KANSL1	0.564			1.964			0.595
F1RRS9	1044	S	Uncharacterized protein	KAT8 regulatory NSL complex subunit 1 OS=Homo sapiens GN=KANSL1 PE=1 SV=2	KAT8 regulatory NSL complex subunit 1 OS=Mus musculus GN=Kansl1 PE=1 SV=1	KANSL1	0.928	0.56		1.503	1.939		0.653	0.646
F1RRS9	249	S	Uncharacterized protein	KAT8 regulatory NSL complex subunit 1 OS=Homo sapiens GN=KANSL1 PE=1 SV=2	KAT8 regulatory NSL complex subunit 1 OS=Mus musculus GN=Kansl1 PE=1 SV=1	KANSL1	0.63			1.789			0.683
F1RRT6	143	S	Uncharacterized protein	Protein EFR3 homolog A OS=Homo sapiens GN=EFR3A PE=1 SV=2	Protein EFR3 homolog A OS=Mus musculus GN=Efr3a PE=1 SV=1	EFR3A	0.378	0.409	0.855	2.371	2.386	1.422	0.418	0.415	0.754
F1RRU6	73	S	Uncharacterized protein	Serine/threonine-protein kinase tousled-like 2 OS=Homo sapiens GN=TLK2 PE=1 SV=2	Serine/threonine-protein kinase tousled-like 2 OS=Mus musculus GN=Tlk2 PE=1 SV=2	TLK2	0.813			1.334			0.901			1.14572	1.12833	1.11208	0.785198	0.83056	0.858293	1.0633	1.00681	1.03878	0.7096			1.69893			0.847359			2.00498		2.39421		0.837425
F1RRV1	1486	S	Uncharacterized protein	Protein TANC2 OS=Homo sapiens GN=TANC2 PE=1 SV=3	Protein TANC2 OS=Mus musculus GN=Tanc2 PE=1 SV=1	TANC2	0.762			1.743			0.601			0.932428			1.32212			0.767053			0.817221			1.31834			0.783518			1.68259		1.6132		1.04302
F1RRW9	345	S	Uncharacterized protein	Cip1-interacting zinc finger protein OS=Homo sapiens GN=CIZ1 PE=1 SV=2	RNA-binding protein 20 OS=Mus musculus GN=Rbm20 PE=1 SV=3	CIZ1	0.702	0.647	0.639	1.637	1.791	1.766	0.746	0.684	0.635	1.0563	1.08102	1.07253	0.941148	0.983803	0.864227	1.00237	0.940064	1.06896	0.664583	0.598507	0.595785	1.73937	1.82049	2.04344	0.744237	0.72761	0.594037	2.7123	0.00137532	3.01435	0.00350445	0.899796	0.285088
F1RRW9	393	S	Uncharacterized protein	Cip1-interacting zinc finger protein OS=Homo sapiens GN=CIZ1 PE=1 SV=2	RNA-binding protein 20 OS=Mus musculus GN=Rbm20 PE=1 SV=3	CIZ1	0.704	0.778	1.04	1.567	1.502	1.353	0.804	0.802	0.65	1.0563	1.08102	1.07253	0.941148	0.983803	0.864227	1.00237	0.940064	1.06896	0.666476	0.719688	0.969666	1.66499	1.52673	1.56556	0.8021	0.853134	0.608069	2.10192	0.00195782	2.01936	0.00587544	1.04088	0.80984
F1RRW9	376	S	Uncharacterized protein	Cip1-interacting zinc finger protein OS=Homo sapiens GN=CIZ1 PE=1 SV=2	RNA-binding protein 20 OS=Mus musculus GN=Rbm20 PE=1 SV=3	CIZ1	0.352	0.476	0.336	2.426	2.108	2.33	0.395	0.582	0.39	1.0563	1.08102	1.07253	0.941148	0.983803	0.864227	1.00237	0.940064	1.06896	0.333238	0.440323	0.313277	2.5777	2.14271	2.69605	0.394066	0.619107	0.364841	5.38199	0.00207632	6.82389	0.00444928	0.788698	0.359659
F1RRW9	374	S	Uncharacterized protein	Cip1-interacting zinc finger protein OS=Homo sapiens GN=CIZ1 PE=1 SV=2	RNA-binding protein 20 OS=Mus musculus GN=Rbm20 PE=1 SV=3	CIZ1	0.592	0.491	0.46	1.995	2.099	2.057	0.544	0.576	0.53	1.0563	1.08102	1.07253	0.941148	0.983803	0.864227	1.00237	0.940064	1.06896	0.560446	0.454199	0.428891	2.11975	2.13356	2.38016	0.542714	0.612724	0.49581	4.01725	0.000769863	4.5953	0.000457546	0.874208	0.261116
F1RRZ3	241	S	Uncharacterized protein	Serine/threonine-protein kinase 10 OS=Homo sapiens GN=STK10 PE=1 SV=1	Serine/threonine-protein kinase 10 OS=Mus musculus GN=Stk10 PE=1 SV=2	---	0.823	0.96	0.908	1.104	1.316	1.405	1.089	0.787	0.721
F1RS45	1336	S	DNA topoisomerase 2			TOP2B	0.643			1.914			0.564			1.13821	1.15197	1.12436	0.734646	0.776245	0.725373	1.10908	1.04695	1.14665	0.564922			2.60534			0.508528			5.12329		4.61185		1.1109
F1RS45	1540	S	DNA topoisomerase 2			TOP2B	0.437	0.431	0.364	2.203	2.163	2.273	0.507	0.578	0.419	1.13821	1.15197	1.12436	0.734646	0.776245	0.725373	1.10908	1.04695	1.14665	0.383936	0.374142	0.323739	2.99872	2.78649	3.13356	0.457134	0.552077	0.365412	6.48816	0.00018403	8.24426	0.00108812	0.786991	0.204621
F1RS45	1444	S	DNA topoisomerase 2			TOP2B	0.664	0.579		1.674	1.763		0.749	0.772		1.13821	1.15197	1.12436	0.734646	0.776245	0.725373	1.10908	1.04695	1.14665	0.583373	0.502617		2.27865	2.27119		0.675333	0.737377		3.22065	0.011389	4.18958	0.014025	0.768729	0.0923255
F1RS45	1330	S	DNA topoisomerase 2			TOP2B	0.632	0.627	0.692	1.898	1.789	1.676	0.587	0.705	0.67	1.13821	1.15197	1.12436	0.734646	0.776245	0.725373	1.10908	1.04695	1.14665	0.555258	0.544285	0.615459	2.58356	2.30468	2.31053	0.529266	0.673381	0.58431	4.02851	0.000574929	4.19753	0.00157897	0.959733	0.647752
F1RS45	1548	Y	DNA topoisomerase 2			TOP2B	0.2	0.319	0.373	2.746	2.399	2.275	0.262	0.487	0.407	1.13821	1.15197	1.12436	0.734646	0.776245	0.725373	1.10908	1.04695	1.14665	0.175715	0.276917	0.331743	3.73786	3.09052	3.13632	0.236231	0.465159	0.354947	9.43325	0.00252456	12.704	0.00330244	0.742542	0.329586
F1RS45	1603	S	DNA topoisomerase 2			TOP2B	0.658	0.708	0.691	1.632	1.588	1.529	0.791	0.798	0.807	1.13821	1.15197	1.12436	0.734646	0.776245	0.725373	1.10908	1.04695	1.14665	0.578101	0.614599	0.61457	2.22148	2.04575	2.10788	0.713202	0.762211	0.703789	2.92543	0.000443244	3.52748	0.000663203	0.829327	0.00702345
F1RS45	1515	S	DNA topoisomerase 2			TOP2B	0.43	0.412	0.469	2.293	2.282	2.131	0.437	0.498	0.452	1.13821	1.15197	1.12436	0.734646	0.776245	0.725373	1.10908	1.04695	1.14665	0.377786	0.357648	0.417125	3.12123	2.93979	2.9378	0.394019	0.475665	0.394192	7.12002	7.2064e-05	7.80769	0.000217419	0.911925	0.324956
F1RS45	1392	S	DNA topoisomerase 2			TOP2B	0.604	0.428	0.546	1.843	2.195	1.944	0.66	0.554	0.555	1.13821	1.15197	1.12436	0.734646	0.776245	0.725373	1.10908	1.04695	1.14665	0.530658	0.371538	0.485608	2.50869	2.82771	2.68	0.595086	0.529154	0.484018	4.98453	0.000666125	5.77633	0.000232217	0.862923	0.277417
F1RS45	1458	S	DNA topoisomerase 2			TOP2B	0.442	0.419	0.448	2.216	2.201	2.142	0.492	0.558	0.463	1.13821	1.15197	1.12436	0.734646	0.776245	0.725373	1.10908	1.04695	1.14665	0.388329	0.363725	0.398447	3.01642	2.83544	2.95296	0.44361	0.532974	0.403785	6.37861	7.43282e-06	7.65303	0.000277	0.833474	0.176031
F1RS45	1416	S	DNA topoisomerase 2			TOP2B	0.438	0.356		2.221	2.406		0.491	0.448		1.13821	1.15197	1.12436	0.734646	0.776245	0.725373	1.10908	1.04695	1.14665	0.384815	0.309036		3.02323	3.09954		0.442708	0.427908		7.03268	0.00697839	8.82432	0.00039231	0.796966	0.247843
F1RS45	1513	S	DNA topoisomerase 2			TOP2B	0.468	0.401		2.195	2.253		0.485	0.532		1.13821	1.15197	1.12436	0.734646	0.776245	0.725373	1.10908	1.04695	1.14665	0.411172	0.348099		2.98783	2.90243		0.437298	0.50814		6.2302	0.000619672	7.75779	0.000718099	0.803089	0.190372
F1RS45	1542	S	DNA topoisomerase 2			TOP2B	0.503	0.456	0.438	2.045	2.099	2.129	0.582	0.609	0.483	1.13821	1.15197	1.12436	0.734646	0.776245	0.725373	1.10908	1.04695	1.14665	0.441922	0.395844	0.389554	2.78365	2.70404	2.93504	0.524758	0.581687	0.421227	5.51345	2.67772e-05	6.86271	0.000430088	0.803392	0.156472
F1RS45	1571	S	DNA topoisomerase 2			TOP2B	0.49	0.374	0.63	2.123	2.406	1.736	0.527	0.431	0.67	1.13821	1.15197	1.12436	0.734646	0.776245	0.725373	1.10908	1.04695	1.14665	0.430501	0.324661	0.560317	2.88983	3.09954	2.39325	0.475167	0.41167	0.58431	5.69801	0.00583192	6.37229	0.00428718	0.894185	0.576185
F1RS45	1338	S	DNA topoisomerase 2			TOP2B	0.434			2.281			0.443			1.13821	1.15197	1.12436	0.734646	0.776245	0.725373	1.10908	1.04695	1.14665	0.381301			3.1049			0.399429			7.77334		8.14291		0.954615
F1RS50	891	S	Uncharacterized protein	OTU domain-containing protein 4 OS=Homo sapiens GN=OTUD4 PE=1 SV=4	OTU domain-containing protein 4 OS=Mus musculus GN=Otud4 PE=1 SV=1	OTUD4	0.658	0.753	0.797	1.612	1.473	1.432	0.809	0.85	0.799		0.96728			0.951227			1.07298			0.778472			1.54853			0.792185		1.95475		1.98919		0.982689
F1RS54	690	S	Uncharacterized protein	Zinc finger protein 827 OS=Homo sapiens GN=ZNF827 PE=1 SV=1	Zinc finger protein 827 OS=Mus musculus GN=Znf827 PE=1 SV=2	ZNF827	0.543	0.523	0.428	1.856	1.991	2.115	0.705	0.635	0.505	1.01866			0.988226			0.993712			0.533054			1.87811			0.709461			2.64724		3.5233		0.751351
F1RS54	761	S	Uncharacterized protein	Zinc finger protein 827 OS=Homo sapiens GN=ZNF827 PE=1 SV=1	Zinc finger protein 827 OS=Mus musculus GN=Znf827 PE=1 SV=2	ZNF827	0.706	0.506		1.789	1.926		0.613	0.705		1.01866			0.988226			0.993712			0.693068			1.81031			0.616879			2.93463		2.61203		1.12351
F1RS58	180	S	Uncharacterized protein	Zinc finger protein 385D OS=Homo sapiens GN=ZNF385D PE=2 SV=1	Zinc finger protein 385B OS=Mus musculus GN=Znf385b PE=2 SV=1	ZNF385D	0.536			2.108			0.497
F1RS59	461	S	Uncharacterized protein	Shugoshin 1 OS=Homo sapiens GN=SGO1 PE=1 SV=1	Shugoshin 1 OS=Mus musculus GN=Sgo1 PE=2 SV=1	SGO1	0.341	0.403	0.385	2.519	2.269	2.314	0.326	0.518	0.361
F1RS65	556	S	Uncharacterized protein	TBC1 domain family member 5 OS=Homo sapiens GN=TBC1D5 PE=1 SV=1	TBC1 domain family member 5 OS=Mus musculus GN=Tbc1d5 PE=1 SV=2	TBC1D5	0.668	0.659	0.637	1.642	1.733	1.855	0.774	0.722	0.554	1.14294	1.10434	1.11372	0.712773	0.857833	0.705801	1.12339	1.02979	1.10788	0.584459	0.596734	0.571958	2.30368	2.02021	2.62822	0.688986	0.701117	0.500054	3.67806	0.00542541	3.96549	0.0100239	0.927517	0.55624
F1RS65	541	S	Uncharacterized protein	TBC1 domain family member 5 OS=Homo sapiens GN=TBC1D5 PE=1 SV=1	TBC1 domain family member 5 OS=Mus musculus GN=Tbc1d5 PE=1 SV=2	TBC1D5	0.877			1.232			0.929			1.14294	1.10434	1.11372	0.712773	0.857833	0.705801	1.12339	1.02979	1.10788	0.767321			1.72846			0.826961			2.09013		2.25259		0.92788
F1RS77	371	S	Uncharacterized protein	Mineralocorticoid receptor OS=Homo sapiens GN=NR3C2 PE=1 SV=1	Mineralocorticoid receptor OS=Mus musculus GN=Nr3c2 PE=1 SV=2	LOC102165512	0.595	0.751	0.589	1.836	1.561	1.782	0.675	0.778	0.666
F1RS77	193	S	Uncharacterized protein	Mineralocorticoid receptor OS=Homo sapiens GN=NR3C2 PE=1 SV=1	Mineralocorticoid receptor OS=Mus musculus GN=Nr3c2 PE=1 SV=2	LOC102165512	0.542		0.622	1.932		1.619	0.642		0.786
F1RS89	18	S	Uncharacterized protein	Lipopolysaccharide-responsive and beige-like anchor protein OS=Homo sapiens GN=LRBA PE=1 SV=4	Lipopolysaccharide-responsive and beige-like anchor protein OS=Mus musculus GN=Lrba PE=1 SV=1	---	0.881			1.21			0.945			1.29854	1.17551	1.10747	0.651417	0.661818	0.770054	1.04598	1.12143	1.13082	0.678456			1.85749			0.903459			2.05598		2.73782		0.750954
F1RS91	275	S	Uncharacterized protein	SH3 domain-containing protein 19 OS=Homo sapiens GN=SH3D19 PE=1 SV=2	SH3 domain-containing protein 19 OS=Mus musculus GN=Sh3d19 PE=1 SV=2	SH3D19	0.599			1.845			0.663			1.18597			0.564575			1.22836			0.50507			3.26794			0.539744			6.05461		6.47028		0.935758
F1RSB0	102	S	Uncharacterized protein	Arfaptin-1 OS=Homo sapiens GN=ARFIP1 PE=1 SV=2	Arfaptin-2 OS=Mus musculus GN=Arfip2 PE=1 SV=2	ARFIP1	1.072		1.074	0.706		0.666	1.198		1.254	1.1056	1.15711	1.0893	0.791988	0.629617	0.717137	1.15184	1.17161	1.18795	0.969605		0.985955	0.891428		0.928693	1.04007		1.0556	0.868516	0.053234	0.930741	0.129538	0.933145	0.0250939
F1RSD1	60	S	Uncharacterized protein	Kinesin-associated protein 3 OS=Homo sapiens GN=KIFAP3 PE=1 SV=2	Kinesin-associated protein 3 OS=Mus musculus GN=Kifap3 PE=1 SV=1	KIFAP3	0.503	0.524	0.538	2.199	2.071	1.985	0.452	0.568	0.526	1.08408	1.22846	1.1839	0.942214	0.714206	0.763701	0.975992	1.04275	1.0674	0.463986	0.42655	0.454431	2.33386	2.89972	2.59918	0.463119	0.544714	0.492784	5.2197	0.00516699	5.82376	0.00548678	0.896276	0.148621
F1RSD1	102	S	Uncharacterized protein	Kinesin-associated protein 3 OS=Homo sapiens GN=KIFAP3 PE=1 SV=2	Kinesin-associated protein 3 OS=Mus musculus GN=Kifap3 PE=1 SV=1	KIFAP3										1.08408	1.22846	1.1839	0.942214	0.714206	0.763701	0.975992	1.04275	1.0674
F1RSD6	123	T	Uncharacterized protein	Coilin OS=Homo sapiens GN=COIL PE=1 SV=1	Coilin OS=Mus musculus GN=Coil PE=1 SV=1	COIL	0.579	0.56	0.557	1.92	1.901	1.907	0.618	0.675	0.578	0.96851	0.999501	0.946934	1.04042	1.12458	1.11411	0.933947	0.890596	0.934837	0.597825	0.56028	0.588214	1.84541	1.6904	1.71167	0.661708	0.757919	0.61829	2.57493	8.78306e-05	3.00489	0.00106816	0.856914	0.134435
F1RSD6	117	S	Uncharacterized protein	Coilin OS=Homo sapiens GN=COIL PE=1 SV=1	Coilin OS=Mus musculus GN=Coil PE=1 SV=1	COIL	0.584	0.422	0.482	1.869	2.268	2.002	0.657	0.5	0.561	0.96851	0.999501	0.946934	1.04042	1.12458	1.11411	0.933947	0.890596	0.934837	0.602988	0.422211	0.509011	1.79639	2.01675	1.79694	0.703466	0.561422	0.600105	3.0081	0.000474105	3.65666	0.000215319	0.822636	0.179414
F1RSE5	178	S	Uncharacterized protein	CCAAT/enhancer-binding protein delta OS=Homo sapiens GN=CEBPD PE=1 SV=2	CCAAT/enhancer-binding protein delta OS=Mus musculus GN=Cebpd PE=1 SV=2	CEBPD	0.845	0.737	0.856	1.344	1.276	1.267	0.864	1.028	0.898	1.17918			0.589444			1.21182			0.716599			2.28011			0.712979			3.19801		3.18185		1.00508
F1RSE6	2926	S	Uncharacterized protein	DNA-dependent protein kinase catalytic subunit OS=Homo sapiens GN=PRKDC PE=1 SV=3	DNA-dependent protein kinase catalytic subunit OS=Mus musculus GN=Prkdc PE=1 SV=3	PRKDC	0.741	0.571	0.706	1.624	1.68	1.552	0.722	0.847	0.771	1.13158	1.123	1.07341	0.775168	0.88927	0.907189	1.06903	1.00573	1.03456	0.654839	0.508457	0.657715	2.09503	1.88919	1.71078	0.675377	0.842177	0.745241	2.5168	0.00364608	3.12738	0.00255499	0.804761	0.099918
F1RSE7	27	S	Uncharacterized protein	DNA replication licensing factor MCM4 OS=Homo sapiens GN=MCM4 PE=1 SV=5	DNA replication licensing factor MCM4 OS=Mus musculus GN=Mcm4 PE=1 SV=1	MCM4	0.555		0.671	1.799		1.339	0.743		1	1.26157	1.2225	1.13176	0.657556	0.681128	0.832755	1.07971	1.05514	1.04594	0.43993		0.592883	2.73589		1.60792	0.688149		0.956082	2.64185	0.237565	4.2058	0.203622	0.628144	0.217842
F1RSE7	61	S	Uncharacterized protein	DNA replication licensing factor MCM4 OS=Homo sapiens GN=MCM4 PE=1 SV=5	DNA replication licensing factor MCM4 OS=Mus musculus GN=Mcm4 PE=1 SV=1	MCM4	0.805	0.544	0.731	1.22	1.912	1.35	1.006	0.682	0.936	1.26157	1.2225	1.13176	0.657556	0.681128	0.832755	1.07971	1.05514	1.04594	0.638096	0.444991	0.645898	1.85536	2.80711	1.62113	0.931734	0.646362	0.894892	2.54089	0.0651903	3.63426	0.0485738	0.699148	0.0955256
F1RSE7	37	S	Uncharacterized protein	DNA replication licensing factor MCM4 OS=Homo sapiens GN=MCM4 PE=1 SV=5	DNA replication licensing factor MCM4 OS=Mus musculus GN=Mcm4 PE=1 SV=1	MCM4	0.464	0.357	0.615	1.96	2.341	1.758	0.689	0.5	0.664	1.26157	1.2225	1.13176	0.657556	0.681128	0.832755	1.07971	1.05514	1.04594	0.367797	0.292025	0.543403	2.98074	3.43695	2.11107	0.638136	0.473872	0.634838	4.88237	0.0264377	7.08824	0.0212698	0.688798	0.127153
F1RSG8	100	S	Uncharacterized protein	Transcription elongation factor A protein 1 OS=Homo sapiens GN=TCEA1 PE=1 SV=2	Transcription elongation factor A protein 1 OS=Mus musculus GN=Tcea1 PE=1 SV=2	TCEA1	0.587	0.559	0.537	1.863	1.897	1.922	0.659	0.681	0.586	0.981792	1.02234	0.920904	1.04842	0.990147	1.08537	0.944359	0.988305	0.961776	0.597886	0.546787	0.583123	1.77695	1.91588	1.77083	0.697828	0.689058	0.609289	2.73707	0.000137532	3.16222	0.000573524	0.865553	0.0662643
F1RSH4	205	S	Uncharacterized protein	U3 small nucleolar RNA-associated protein 18 homolog OS=Homo sapiens GN=UTP18 PE=1 SV=3	U3 small nucleolar RNA-associated protein 18 homolog OS=Mus musculus GN=Utp18 PE=1 SV=1	UTP18	0.815			1.376			0.864			1.05086		1.01609	0.938118		0.95309	1.01012		1.03201	0.775555			1.46677			0.855347			1.71482		1.89125		0.906713
F1RSH4	209	S	Uncharacterized protein	U3 small nucleolar RNA-associated protein 18 homolog OS=Homo sapiens GN=UTP18 PE=1 SV=3	U3 small nucleolar RNA-associated protein 18 homolog OS=Mus musculus GN=Utp18 PE=1 SV=1	UTP18	0.829	0.607	0.758	1.269	1.779	1.327	0.943	0.732	0.931	1.05086		1.01609	0.938118		0.95309	1.01012		1.03201	0.788877		0.745998	1.35271		1.39231	0.933556		0.902121	1.49537	0.00383973	1.78843	0.00238849	0.836136	0.0361491
F1RSJ1	316	S	Uncharacterized protein	Protein argonaute-2 OS=Homo sapiens GN=AGO2 PE=1 SV=3	Protein argonaute-2 OS=Mus musculus GN=Ago2 PE=1 SV=3	AGO2	0.707	0.668	0.759	1.512	1.591	1.402	0.848	0.832	0.861	1.05141	1.0301	1.06145	0.880131	0.911502	0.922351	0.98519	1.03705	1.03448	0.672431	0.64848	0.715059	1.71793	1.74547	1.52003	0.860748	0.802274	0.832304	1.9971	0.00515349	2.44769	0.00315306	0.815914	0.00428418
F1RSJ7	185	S	Uncharacterized protein	ATP-dependent RNA helicase DDX42 OS=Homo sapiens GN=DDX42 PE=1 SV=1	ATP-dependent RNA helicase DDX42 OS=Mus musculus GN=Ddx42 PE=1 SV=3	DDX42	0.532	0.417	0.507	1.974	2.252	1.986	0.615	0.519	0.551	1.04212	1.04648	1.03796	1.01474	0.996217	1.1032	0.915911	0.890638	0.888951	0.510497	0.398478	0.488459	1.94533	2.26055	1.80022	0.671462	0.582728	0.619832	3.20492	0.00785264	4.29795	0.00532075	0.745686	0.0236166
F1RSL4	890	S	Uncharacterized protein	Maestro heat-like repeat-containing protein family member 1 OS=Homo sapiens GN=MROH1 PE=2 SV=3	Maestro heat-like repeat-containing protein family member 2B OS=Mus musculus GN=Mroh2b PE=2 SV=2	MROH1	1.032			1.238			0.784
F1RSL5	662	S	Uncharacterized protein	Serine/threonine-protein kinase/endoribonuclease IRE1 OS=Homo sapiens GN=ERN1 PE=1 SV=2	Serine/threonine-protein kinase/endoribonuclease IRE1 OS=Mus musculus GN=Ern1 PE=1 SV=1	ERN1	0.816	0.727	0.9	1.256	1.299	1	0.966	1.018	1.104
F1RSM3	1163	T	Uncharacterized protein	Probable helicase with zinc finger domain OS=Homo sapiens GN=HELZ PE=1 SV=2	Probable helicase with zinc finger domain OS=Mus musculus GN=Helz PE=1 SV=2	HELZ	0.829			1.417			0.818
F1RSM3	1317	S	Uncharacterized protein	Probable helicase with zinc finger domain OS=Homo sapiens GN=HELZ PE=1 SV=2	Probable helicase with zinc finger domain OS=Mus musculus GN=Helz PE=1 SV=2	HELZ	0.678			1.611			0.789
F1RSM7	308	S	Uncharacterized protein	Heat shock factor protein 1 OS=Homo sapiens GN=HSF1 PE=1 SV=1	Heat shock factor protein 1 OS=Mus musculus GN=Hsf1 PE=1 SV=2	HSF1	0.597	0.573	0.535	1.847	1.855	1.899	0.665	0.703	0.607	1.08453	1.15228	1.10469	0.832575	0.792983	0.858086	1.0759	1.04306	1.04573	0.550468	0.497274	0.484297	2.21842	2.33927	2.21306	0.618088	0.673978	0.580457	3.61584	1.86863e-05	4.41944	5.08254e-05	0.818168	0.0321979
F1RSM7	304	S	Uncharacterized protein	Heat shock factor protein 1 OS=Homo sapiens GN=HSF1 PE=1 SV=1	Heat shock factor protein 1 OS=Mus musculus GN=Hsf1 PE=1 SV=2	HSF1	0.811	0.708	0.642	1.416	1.535	1.666	0.834	0.84	0.725	1.08453	1.15228	1.10469	0.832575	0.792983	0.858086	1.0759	1.04306	1.04573	0.747788	0.614433	0.581157	1.70075	1.93573	1.94153	0.775166	0.805323	0.693297	2.45318	0.00173719	2.87026	0.000523443	0.854688	0.15611
F1RSM7	360	S	Uncharacterized protein	Heat shock factor protein 1 OS=Homo sapiens GN=HSF1 PE=1 SV=1	Heat shock factor protein 1 OS=Mus musculus GN=Hsf1 PE=1 SV=2	HSF1	0.639			1.768			0.692			1.08453	1.15228	1.10469	0.832575	0.792983	0.858086	1.0759	1.04306	1.04573	0.589194			2.12353			0.643183			3.3016		3.60413		0.916059
F1RSM9	60	S	Repressor of RNA polymerase III transcription MAF1			MAF1	0.619			1.811			0.674
F1RSM9	68	S	Repressor of RNA polymerase III transcription MAF1			MAF1	0.671	0.684	0.653	1.718	1.696	1.747	0.706	0.729	0.64
F1RSN0	392	S	Uncharacterized protein	Sharpin OS=Homo sapiens GN=SHARPIN PE=1 SV=1	Sharpin OS=Mus musculus GN=Sharpin PE=1 SV=1	SHARPIN	1.186			1.161			0.708			1.14335	1.03292	1.06355	0.842546	1.02304	0.943326	1.01299	0.949528	1.02095	1.0373			1.37797			0.698919			1.97157		1.32841		1.48415
F1RSN0	400	S	Uncharacterized protein	Sharpin OS=Homo sapiens GN=SHARPIN PE=1 SV=1	Sharpin OS=Mus musculus GN=Sharpin PE=1 SV=1	SHARPIN	0.679	0.57	0.775	1.813	1.744	1.635	0.618	0.797	0.632	1.14335	1.03292	1.06355	0.842546	1.02304	0.943326	1.01299	0.949528	1.02095	0.593868	0.551832	0.728689	2.15181	1.70473	1.73323	0.610073	0.839364	0.619029	2.70237	0.00547598	2.98218	0.00722351	0.906173	0.5247
F1RSN0	404	S	Uncharacterized protein	Sharpin OS=Homo sapiens GN=SHARPIN PE=1 SV=1	Sharpin OS=Mus musculus GN=Sharpin PE=1 SV=1	SHARPIN	0.874		0.763	1.388		1.541	0.8		0.73	1.14335	1.03292	1.06355	0.842546	1.02304	0.943326	1.01299	0.949528	1.02095	0.764419		0.717406	1.64739		1.63358	0.789739		0.715018	2.1804	0.0222768	2.21414	0.00975837	0.98476	0.823271
F1RSP4	353	S	Uncharacterized protein	Protein phosphatase 1 regulatory subunit 16A OS=Homo sapiens GN=PPP1R16A PE=1 SV=1	Protein phosphatase 1 regulatory subunit 16A OS=Mus musculus GN=Ppp1r16a PE=1 SV=1	PPP1R16A	0.887		0.912	1.026		0.909	1.096		1.178	1.0517			0.790308			1.14459			0.843397			1.29823			0.957546			1.35579		1.53929		0.88079
F1RSP7	256	S	Uncharacterized protein	ATP-dependent DNA helicase Q4 OS=Homo sapiens GN=RECQL4 PE=1 SV=1	ATP-dependent DNA helicase Q4 OS=Mus musculus GN=Recql4 PE=2 SV=2	RECQL4	0.753			1.649			0.689
F1RSP7	1165	S	Uncharacterized protein	ATP-dependent DNA helicase Q4 OS=Homo sapiens GN=RECQL4 PE=1 SV=1	ATP-dependent DNA helicase Q4 OS=Mus musculus GN=Recql4 PE=2 SV=2	RECQL4	0.83			1.39			0.839
F1RSR2	30	S	Uncharacterized protein	Serine/threonine-protein kinase DCLK1 OS=Homo sapiens GN=DCLK1 PE=1 SV=2	Serine/threonine-protein kinase DCLK1 OS=Mus musculus GN=Dclk1 PE=1 SV=1	---	0.924	0.746		1.09	1.221		1.008	1.066
F1RSR8	243	S	Uncharacterized protein	Sister chromatid cohesion protein PDS5 homolog B OS=Homo sapiens GN=PDS5B PE=1 SV=1	Sister chromatid cohesion protein PDS5 homolog B OS=Mus musculus GN=Pds5b PE=1 SV=1	LOC100154396	0.553	0.529	0.596	2.02	2.031	1.946	0.557	0.597	0.507	0.98179	1.1292	1.05826	0.939641	0.961811	0.900074	0.992162	0.86031	1.07	0.563257	0.468471	0.56319	2.14976	2.11164	2.16204	0.5614	0.693936	0.473831	3.71476	0.00100884	4.02744	3.26295e-05	0.922362	0.576147
F1RSR8	419	S	Uncharacterized protein	Sister chromatid cohesion protein PDS5 homolog B OS=Homo sapiens GN=PDS5B PE=1 SV=1	Sister chromatid cohesion protein PDS5 homolog B OS=Mus musculus GN=Pds5b PE=1 SV=1	LOC100154396	0.429	0.448	0.517	2.292	2.135	1.941	0.439	0.586	0.586	0.98179	1.1292	1.05826	0.939641	0.961811	0.900074	0.992162	0.86031	1.07	0.436957	0.396739	0.488539	2.43923	2.21977	2.15649	0.442468	0.68115	0.547662	4.07801	0.000132514	5.15452	0.000991355	0.791151	0.22829
F1RSR8	318	S	Uncharacterized protein	Sister chromatid cohesion protein PDS5 homolog B OS=Homo sapiens GN=PDS5B PE=1 SV=1	Sister chromatid cohesion protein PDS5 homolog B OS=Mus musculus GN=Pds5b PE=1 SV=1	LOC100154396	0.401	0.338	0.345	2.284	2.424	2.322	0.471	0.449	0.389	0.98179	1.1292	1.05826	0.939641	0.961811	0.900074	0.992162	0.86031	1.07	0.408438	0.299326	0.326007	2.43072	2.52025	2.57979	0.474721	0.521905	0.36355	5.5366	5.89373e-06	7.28474	4.8451e-06	0.760027	0.13869
F1RSR8	227	S	Uncharacterized protein	Sister chromatid cohesion protein PDS5 homolog B OS=Homo sapiens GN=PDS5B PE=1 SV=1	Sister chromatid cohesion protein PDS5 homolog B OS=Mus musculus GN=Pds5b PE=1 SV=1	LOC100154396	0.588	0.601	0.559	1.861	1.802	1.907	0.66	0.718	0.577	0.98179	1.1292	1.05826	0.939641	0.961811	0.900074	0.992162	0.86031	1.07	0.598906	0.532233	0.528226	1.98054	1.87355	2.11871	0.665214	0.834583	0.539251	2.92921	0.000356596	3.59945	0.00105895	0.813795	0.274459
F1RST0	384	S	Uncharacterized protein	Heat shock protein 105 kDa OS=Homo sapiens GN=HSPH1 PE=1 SV=1	Heat shock protein 105 kDa OS=Mus musculus GN=Hsph1 PE=1 SV=2	HSPH1	0.836	0.772		1.364	1.418		0.857	0.877		1.05773	1.05429	0.939817	0.907483	0.884364	1.03728	1.03964	1.04999	0.962372	0.790373	0.732245		1.50306	1.60341		0.824325	0.835246		1.87185	0.041828	2.04022	0.0119403	0.917477	0.246192
F1RST0	810	S	Uncharacterized protein	Heat shock protein 105 kDa OS=Homo sapiens GN=HSPH1 PE=1 SV=1	Heat shock protein 105 kDa OS=Mus musculus GN=Hsph1 PE=1 SV=2	HSPH1	0.484	0.322	0.348	2.032	2.507	2.375	0.61	0.397	0.338	1.05773	1.05429	0.939817	0.907483	0.884364	1.03728	1.03964	1.04999	0.962372	0.457584	0.305418	0.370285	2.23916	2.8348	2.28963	0.586742	0.378099	0.351216	5.5952	0.00399521	6.49756	0.00611308	0.861124	0.528433
F1RSY4	403	S	Uncharacterized protein	Sphingomyelin phosphodiesterase 2 OS=Homo sapiens GN=SMPD2 PE=1 SV=2	Sphingomyelin phosphodiesterase 2 OS=Mus musculus GN=Smpd2 PE=1 SV=1	SMPD2	0.626	0.683	0.642	1.813	1.713	1.753	0.666	0.717	0.644	0.956476	0.89763	0.950868	1.15364	1.33415	1.00723	0.903038	0.821866	1.0788	0.654486	0.760892	0.675172	1.57155	1.28396	1.74042	0.73751	0.872405	0.59696	2.08255	0.0116127	2.19843	0.0196665	0.94729	0.686119
F1RSY4	291	S	Uncharacterized protein	Sphingomyelin phosphodiesterase 2 OS=Homo sapiens GN=SMPD2 PE=1 SV=2	Sphingomyelin phosphodiesterase 2 OS=Mus musculus GN=Smpd2 PE=1 SV=1	SMPD2	0.546	0.507	0.483	1.959	2.036	1.993	0.615	0.613	0.567	0.956476	0.89763	0.950868	1.15364	1.33415	1.00723	0.903038	0.821866	1.0788	0.570845	0.56482	0.507957	1.6981	1.52606	1.97869	0.681034	0.745864	0.525585	2.66474	0.00564018	3.16548	0.0107709	0.841812	0.251835
F1RSZ2	98	T	Uncharacterized protein	Centromere protein U OS=Homo sapiens GN=CENPU PE=1 SV=1	Centromere protein U OS=Mus musculus GN=Cenpu PE=1 SV=2	CENPU	0.592	0.579		1.961	1.878		0.571	0.676			0.95058			1.24565			0.828647			0.609102			1.50764			0.815788		1.84808		2.47519		0.746643
F1RT13	28	S	Uncharacterized protein	RWD domain-containing protein 4 OS=Homo sapiens GN=RWDD4 PE=1 SV=3	RWD domain-containing protein 4 OS=Mus musculus GN=Rwdd4 PE=2 SV=1	RWDD4	1.017	0.914	0.996	0.991	0.975	0.866	1.007	1.111	1.141			0.746963			1.49789			0.735305			1.3334			0.578145			1.55174	0.372579		0.433587		0.859294
F1RT23	293	S	Uncharacterized protein	Forkhead box protein O3 OS=Homo sapiens GN=FOXO3 PE=1 SV=1	Forkhead box protein O3 OS=Mus musculus GN=Foxo3 PE=1 SV=1	FOXO3
F1RT25	25	S	Uncharacterized protein	Sorting nexin-3 OS=Homo sapiens GN=SNX3 PE=1 SV=3	Sorting nexin-3 OS=Mus musculus GN=Snx3 PE=1 SV=3	SNX3	0.961	1.038	0.925	1.143	0.856	0.829	0.929	1.096	1.24	1.17359	1.15404	1.18272	0.670001	0.643049	0.701836	1.16221	1.0983	1.12209	0.818858	0.899451	0.782094	1.70597	1.33116	1.18119	0.799342	0.997905	1.10508	1.45342	0.0876135	1.68705	0.0607233	0.861517	0.270755
F1RT41	371	S	Uncharacterized protein	Sine oculis-binding protein homolog OS=Homo sapiens GN=SOBP PE=1 SV=2	Sine oculis-binding protein homolog OS=Mus musculus GN=Sobp PE=1 SV=1	SOBP	0.724	0.629	0.599	1.571	1.756	1.704	0.782	0.731	0.729
F1RT41	403	S	Uncharacterized protein	Sine oculis-binding protein homolog OS=Homo sapiens GN=SOBP PE=1 SV=2	Sine oculis-binding protein homolog OS=Mus musculus GN=Sobp PE=1 SV=1	SOBP	0.779	0.754	0.79	1.366	1.406	1.359	0.906	0.903	0.873
F1RT52	91	S	Uncharacterized protein	Trimethylguanosine synthase OS=Homo sapiens GN=TGS1 PE=1 SV=3	Trimethylguanosine synthase OS=Mus musculus GN=Tgs1 PE=1 SV=2	TGS1		0.744	0.751		1.59	1.472		0.763	0.805
F1RT52	438	S	Uncharacterized protein	Trimethylguanosine synthase OS=Homo sapiens GN=TGS1 PE=1 SV=3	Trimethylguanosine synthase OS=Mus musculus GN=Tgs1 PE=1 SV=2	TGS1	0.783		0.801	1.43		1.431	0.848		0.796
F1RT69	262	S	Uncharacterized protein	Protein FAM110B OS=Homo sapiens GN=FAM110B PE=1 SV=1	Protein FAM110B OS=Mus musculus GN=Fam110b PE=1 SV=1	FAM110B	0.859			1.124			1.039			1.24579	1.18428	1.23543	0.436353	0.522307	0.35823	1.29099	1.25244	1.42397	0.689523			2.5759			0.804809			3.20063		3.73577		0.856754
F1RT70	235	S	Uncharacterized protein	UBX domain-containing protein 2B OS=Homo sapiens GN=UBXN2B PE=1 SV=1	UBX domain-containing protein 2B OS=Mus musculus GN=Ubxn2b PE=1 SV=2	UBXN2B	0.91	0.847		1.178	1.273		0.946	0.927
F1RT80	65	S	Uncharacterized protein	Crossover junction endonuclease EME1 OS=Homo sapiens GN=EME1 PE=1 SV=2	Crossover junction endonuclease EME1 OS=Mus musculus GN=Eme1 PE=1 SV=1	EME1	0.485	0.493	0.462	2.159	2.098	2.017	0.501	0.575	0.566	1.08361			1.02569			0.900045			0.447578			2.10492			0.556639			3.78148		4.70291		0.804073
F1RT88	1876	S	Uncharacterized protein	Chromodomain-helicase-DNA-binding protein 7 OS=Homo sapiens GN=CHD7 PE=1 SV=3	Chromodomain-helicase-DNA-binding protein 7 OS=Mus musculus GN=Chd7 PE=1 SV=1	CHD7	0.886		0.872	1.267		1.261	0.892		0.888			1.18014			0.62315			1.21073			0.738898			2.02359			0.73344	2.75904		2.73866		1.00744
F1RT88	2553	S	Uncharacterized protein	Chromodomain-helicase-DNA-binding protein 7 OS=Homo sapiens GN=CHD7 PE=1 SV=3	Chromodomain-helicase-DNA-binding protein 7 OS=Mus musculus GN=Chd7 PE=1 SV=1	CHD7	0.797	0.76	0.767	1.485	1.533	1.504	0.788	0.793	0.761			1.18014			0.62315			1.21073			0.649926			2.41354			0.628545	3.83989		3.71357		1.03402
F1RTA1	920	S	Uncharacterized protein	Canalicular multispecific organic anion transporter 2 OS=Homo sapiens GN=ABCC3 PE=1 SV=3	Canalicular multispecific organic anion transporter 2 OS=Mus musculus GN=Abcc3 PE=1 SV=1	ABCC3	0.619			1.722			0.749
F1RTA1	1151	S	Uncharacterized protein	Canalicular multispecific organic anion transporter 2 OS=Homo sapiens GN=ABCC3 PE=1 SV=3	Canalicular multispecific organic anion transporter 2 OS=Mus musculus GN=Abcc3 PE=1 SV=1	ABCC3	0.793			1.302			0.948
F1RTB9	124	S	Histone acetyltransferase			KAT7	0.868	0.814	0.847	1.255	1.277	1.204	0.919	0.956	0.963	0.682535	1.00023	0.969255	1.57544	1.05172	1.09645	0.801606	0.907968	0.982019	1.27173	0.81381	0.873867	0.796604	1.2142	1.09809	1.14645	1.0529	0.980633	0.977646	0.871998	1.05051	0.806401	0.930636	0.667565
F1RTB9	88	T	Histone acetyltransferase			KAT7	0.524	0.534		1.94	1.886		0.652	0.713		0.682535	1.00023	0.969255	1.57544	1.05172	1.09645	0.801606	0.907968	0.982019	0.767726	0.533875		1.2314	1.79325		0.813367	0.78527		1.89202	0.238208	2.3238	0.162724	0.814194	0.42235
F1RTB9	57	S	Histone acetyltransferase			KAT7	0.519	0.468	0.526	2.042	2.094	1.952	0.569	0.601	0.566	0.682535	1.00023	0.969255	1.57544	1.05172	1.09645	0.801606	0.907968	0.982019	0.7604	0.467891	0.542685	1.29615	1.99102	1.7803	0.709825	0.661918	0.576364	2.60123	0.033154	2.8614	0.0205001	0.909076	0.585565
F1RTB9	56	S	Histone acetyltransferase			KAT7	0.48			2.13			0.531			0.682535	1.00023	0.969255	1.57544	1.05172	1.09645	0.801606	0.907968	0.982019	0.70326			1.35201			0.66242			2.04101		1.92248		1.06165
F1RTB9	162	S	Histone acetyltransferase			KAT7	0.553	0.419	0.443	1.994	2.162	2.139	0.579	0.59	0.468	0.682535	1.00023	0.969255	1.57544	1.05172	1.09645	0.801606	0.907968	0.982019	0.810215	0.418902	0.457052	1.26568	2.05568	1.95085	0.7223	0.649803	0.476569	2.85189	0.0353318	3.12674	0.0237672	0.912097	0.730763
F1RTC1	24	S	Uncharacterized protein	High affinity cAMP-specific 3',5'-cyclic phosphodiesterase 7A OS=Homo sapiens GN=PDE7A PE=1 SV=2	High affinity cAMP-specific 3',5'-cyclic phosphodiesterase 7A OS=Mus musculus GN=Pde7a PE=2 SV=2	PDE7A	0.965	1.041	0.964	1.218	0.833	1.064	0.863	1.112	0.987
F1RTF0	1220	S	Uncharacterized protein	Protein PRRC2A OS=Homo sapiens GN=PRRC2A PE=1 SV=3	Protein PRRC2A OS=Mus musculus GN=Prrc2a PE=1 SV=1	PRRC2A	0.397	0.505	0.371	2.304	2.12	2.225	0.458	0.545	0.455	0.427954	0.505213	0.741011	2.15409	1.98737	1.59982	0.489377	0.569161	0.639283	0.927669	0.999577	0.500667	1.06959	1.06674	1.39078	0.935884	0.95755	0.711735	1.35389	0.0883699	1.45273	0.133785	0.93196	0.757413
F1RTF0	380	S	Uncharacterized protein	Protein PRRC2A OS=Homo sapiens GN=PRRC2A PE=1 SV=3	Protein PRRC2A OS=Mus musculus GN=Prrc2a PE=1 SV=1	PRRC2A	0.42	0.519	0.457	2.272	1.91	2.074	0.465	0.705	0.516	0.427954	0.505213	0.741011	2.15409	1.98737	1.59982	0.489377	0.569161	0.639283	0.981413	1.02729	0.616725	1.05474	0.961071	1.29639	0.950188	1.23867	0.807154	1.10554	0.551457	1.26159	0.239317	0.876308	0.533697
F1RTH4	97	S	Uncharacterized protein	ETS-related transcription factor Elf-4 OS=Homo sapiens GN=ELF4 PE=1 SV=1	ETS-related transcription factor Elf-4 OS=Mus musculus GN=Elf4 PE=1 SV=2	ELF4	0.882	0.771	0.745	1.295	1.452	1.578	0.872	0.85	0.712
F1RTH4	550	S	Uncharacterized protein	ETS-related transcription factor Elf-4 OS=Homo sapiens GN=ELF4 PE=1 SV=1	ETS-related transcription factor Elf-4 OS=Mus musculus GN=Elf4 PE=1 SV=2	ELF4	0.509			2.078			0.549
F1RTH6	442	S	Uncharacterized protein	U3 small nucleolar RNA-associated protein 14 homolog A OS=Homo sapiens GN=UTP14A PE=1 SV=1	U3 small nucleolar RNA-associated protein 14 homolog A OS=Mus musculus GN=Utp14a PE=1 SV=1	UTP14A	0.837			1.128			1.056			0.900624	0.922624	0.86798	1.14086	1.13157	1.13602	0.961977	0.932622	0.877884	0.929356			0.988724			1.09774			0.900691		1.06388		0.846608
F1RTH8	27	S	Uncharacterized protein	SAM and SH3 domain-containing protein 3 OS=Homo sapiens GN=SASH3 PE=1 SV=2	SAM and SH3 domain-containing protein 3 OS=Mus musculus GN=Sash3 PE=1 SV=2	SASH3	1.449		1.291	0.313		1.012	1.188		0.736
F1RTL0	1227	S	Uncharacterized protein	Chromosome-associated kinesin KIF4A OS=Homo sapiens GN=KIF4A PE=1 SV=3	Chromosome-associated kinesin KIF4 OS=Mus musculus GN=Kif4 PE=1 SV=3	KIF4A	0.72	0.691	0.776	1.649	1.554	1.553	0.719	0.842	0.707
F1RTQ8	84	S	Uncharacterized protein	F-actin-uncapping protein LRRC16A OS=Homo sapiens GN=CARMIL1 PE=1 SV=1	F-actin-uncapping protein LRRC16A OS=Mus musculus GN=Carmil1 PE=1 SV=2	CARMIL1	1.062	0.944	0.911	1.114	1.214	1.132	0.861	0.885	0.973	1.27019	1.26261	1.20605	0.648872	0.594372	0.640187	1.07422	1.10473	1.15511	0.836093	0.747658	0.755361	1.71683	2.04249	1.76823	0.801509	0.8011	0.842347	2.2608	0.00859891	2.3631	0.00578631	0.956709	0.346068
F1RTQ8	1321	S	Uncharacterized protein	F-actin-uncapping protein LRRC16A OS=Homo sapiens GN=CARMIL1 PE=1 SV=1	F-actin-uncapping protein LRRC16A OS=Mus musculus GN=Carmil1 PE=1 SV=2	CARMIL1	0.368	0.39		2.31	2.307		0.48	0.499		1.27019	1.26261	1.20605	0.648872	0.594372	0.640187	1.07422	1.10473	1.15511	0.28972	0.308884		3.56003	3.88141		0.446834	0.451693		8.28181	0.0312085	12.4313	0.0293276	0.666205	0.0304717
F1RTS7	1519	S	Uncharacterized protein	Regulating synaptic membrane exocytosis protein 1 OS=Homo sapiens GN=RIMS1 PE=1 SV=1	Regulating synaptic membrane exocytosis protein 1 OS=Mus musculus GN=Rims1 PE=1 SV=2	RIMS1	0.716		0.642	1.642		1.646	0.729		0.743
F1RTV5	107	S	Uncharacterized protein	Multifunctional protein ADE2 OS=Homo sapiens GN=PAICS PE=1 SV=3	Multifunctional protein ADE2 OS=Mus musculus GN=Paics PE=1 SV=4	PAICS										0.926685	0.819114	0.795665	1.2188	1.32668	1.34484	0.863008	0.894504	0.855948
F1RTW4	197	T	Uncharacterized protein	Translation machinery-associated protein 16 OS=Homo sapiens GN=TMA16 PE=1 SV=2	Translation machinery-associated protein 16 OS=Mus musculus GN=Tma16 PE=1 SV=1	TMA16	0.639			1.733			0.722			1.02156	1.04418	1.04149	0.950374	1.04663	0.928002	1.03144	0.924121	1.04492	0.625511			1.82349			0.69999			2.60503		2.9152		0.893601
F1RTW7	178	S	Uncharacterized protein	Abl interactor 1 OS=Homo sapiens GN=ABI1 PE=1 SV=4	Abl interactor 1 OS=Mus musculus GN=Abi1 PE=1 SV=3	ABI1	0.776	0.787	0.76	1.411	1.461	1.479	0.871	0.828	0.79	1.08593	1.06112	1.06387	0.890837	0.870794	0.890535	1.02131	1.05795	1.05068	0.714597	0.741672	0.714376	1.5839	1.67778	1.6608	0.852822	0.782643	0.751893	2.0619	3.48047e-05	2.26775	0.000379099	0.909225	0.126976
F1RTW7	220	S	Uncharacterized protein	Abl interactor 1 OS=Homo sapiens GN=ABI1 PE=1 SV=4	Abl interactor 1 OS=Mus musculus GN=Abi1 PE=1 SV=3	ABI1	0.747	0.783	0.849	1.614	1.393	1.678	0.725	0.888	0.524	1.08593	1.06112	1.06387	0.890837	0.870794	0.890535	1.02131	1.05795	1.05068	0.687892	0.737902	0.798033	1.81178	1.59969	1.88426	0.709869	0.839356	0.498724	2.58587	0.00128402	2.38136	0.00309457	1.08588	0.621893
F1RTZ5	748	S	Uncharacterized protein	Deubiquitinating protein VCIP135 OS=Homo sapiens GN=VCPIP1 PE=1 SV=2	Deubiquitinating protein VCIP135 OS=Mus musculus GN=Vcpip1 PE=1 SV=1	VCPIP1										1.13836	1.14717	1.08272	0.727893	0.702955	0.867652	1.12246	1.12713	1.05626
F1RTZ5	132	S	Uncharacterized protein	Deubiquitinating protein VCIP135 OS=Homo sapiens GN=VCPIP1 PE=1 SV=2	Deubiquitinating protein VCIP135 OS=Mus musculus GN=Vcpip1 PE=1 SV=1	VCPIP1	0.874	0.802	0.909	1.274	1.308	1.131	0.898	0.939	0.976	1.13836	1.14717	1.08272	0.727893	0.702955	0.867652	1.12246	1.12713	1.05626	0.76777	0.699109	0.839553	1.75026	1.86072	1.30352	0.800028	0.83309	0.924019	1.92187	0.0386697	2.13078	0.0306526	0.901959	0.203425
F1RU01	175	S	Uncharacterized protein	Centrosome and spindle pole-associated protein 1 OS=Homo sapiens GN=CSPP1 PE=1 SV=4	Centrosome and spindle pole associated protein 1 OS=Mus musculus GN=Cspp1 PE=1 SV=2	---
F1RU09	479	S	Uncharacterized protein	Nuclear receptor coactivator 2 OS=Homo sapiens GN=NCOA2 PE=1 SV=2	Nuclear receptor coactivator 2 OS=Mus musculus GN=Ncoa2 PE=1 SV=3	NCOA2	0.684	0.575		1.651	1.814		0.75	0.734		1.15031	1.17911	1.01382	0.67947	0.70101	0.966858	1.15584	1.09959	1.02037	0.594621	0.487657		2.42983	2.5877		0.648879	0.66752		3.81156	0.0251699	4.63608	0.00419673	0.822151	0.265007
F1RU09	613	S	Uncharacterized protein	Nuclear receptor coactivator 2 OS=Homo sapiens GN=NCOA2 PE=1 SV=2	Nuclear receptor coactivator 2 OS=Mus musculus GN=Ncoa2 PE=1 SV=3	NCOA2	0.483	0.516		2.136	2.029		0.523	0.611		1.15031	1.17911	1.01382	0.67947	0.70101	0.966858	1.15584	1.09959	1.02037	0.419886	0.43762		3.14363	2.8944		0.452485	0.55566		5.98924	0.014192	7.04138	0.029812	0.850578	0.376989
F1RU09	650	S	Uncharacterized protein	Nuclear receptor coactivator 2 OS=Homo sapiens GN=NCOA2 PE=1 SV=2	Nuclear receptor coactivator 2 OS=Mus musculus GN=Ncoa2 PE=1 SV=3	NCOA2	0.553	0.595	0.549	2.03	1.876	1.874	0.549	0.662	0.617	1.15031	1.17911	1.01382	0.67947	0.70101	0.966858	1.15584	1.09959	1.02037	0.480739	0.504619	0.541514	2.98762	2.67614	1.93824	0.474979	0.602041	0.604681	4.52042	0.0222673	4.9788	0.0225091	0.907933	0.355457
F1RU09	685	S	Uncharacterized protein	Nuclear receptor coactivator 2 OS=Homo sapiens GN=NCOA2 PE=1 SV=2	Nuclear receptor coactivator 2 OS=Mus musculus GN=Ncoa2 PE=1 SV=3	NCOA2	0.626	0.55		1.866	1.853		0.621	0.725		1.15031	1.17911	1.01382	0.67947	0.70101	0.966858	1.15584	1.09959	1.02037	0.5442	0.466455		2.74626	2.64333		0.537272	0.659335		4.50406	0.00167375	5.33277	0.00129659	0.844601	0.34652
F1RU09	407	S	Uncharacterized protein	Nuclear receptor coactivator 2 OS=Homo sapiens GN=NCOA2 PE=1 SV=2	Nuclear receptor coactivator 2 OS=Mus musculus GN=Ncoa2 PE=1 SV=3	NCOA2	0.713	0.571		1.548	1.714		0.812	0.821		1.15031	1.17911	1.01382	0.67947	0.70101	0.966858	1.15584	1.09959	1.02037	0.619832	0.484265		2.27825	2.44504		0.702519	0.74664		3.25933	0.0229901	4.27797	0.00418198	0.761888	0.21324
F1RU31	492	S	Uncharacterized protein	U4/U6.U5 tri-snRNP-associated protein 1 OS=Homo sapiens GN=SART1 PE=1 SV=1	U4/U6.U5 tri-snRNP-associated protein 1 OS=Mus musculus GN=Sart1 PE=1 SV=1	SART1	0.641		0.643	1.769		1.777	0.689		0.622	0.895338	0.925387	0.911167	1.15845	1.19768	1.17835	0.970645	0.906849	0.901895	0.715931		0.705688	1.52704		1.50805	0.709837		0.689659	2.1687	0.00029419	2.13495	0.0010157	1.01581	0.460473
F1RU31	480	S	Uncharacterized protein	U4/U6.U5 tri-snRNP-associated protein 1 OS=Homo sapiens GN=SART1 PE=1 SV=1	U4/U6.U5 tri-snRNP-associated protein 1 OS=Mus musculus GN=Sart1 PE=1 SV=1	SART1	0.534	0.561		2.087	1.884		0.518	0.689		0.895338	0.925387	0.911167	1.15845	1.19768	1.17835	0.970645	0.906849	0.901895	0.596423	0.606233		1.80155	1.57304		0.533666	0.759774		2.60901	0.0230446	2.80595	0.0662871	0.929812	0.756946
F1RU38	327	S	Uncharacterized protein	Splicing factor 3B subunit 2 OS=Homo sapiens GN=SF3B2 PE=1 SV=2		SF3B2	0.38	0.455	0.555	2.203	2.087	1.985	0.559	0.619	0.509	0.890577	0.903102	0.924638	1.22351	1.18889	1.18303	0.892189	0.882901	0.837926	0.426689	0.503819	0.600235	1.80056	1.75542	1.6779	0.626549	0.701098	0.607453	2.70471	2.66257e-05	3.41918	7.75991e-05	0.791041	0.0970671
F1RU38	293	S	Uncharacterized protein	Splicing factor 3B subunit 2 OS=Homo sapiens GN=SF3B2 PE=1 SV=2		SF3B2	0.59		0.647	1.922		1.654	0.606		0.731	0.890577	0.903102	0.924638	1.22351	1.18889	1.18303	0.892189	0.882901	0.837926	0.662492		0.699733	1.57089		1.39811	0.679228		0.872392	1.91348	0.0327106	2.17952	0.0579824	0.877937	0.503033
F1RU40	597	S	Uncharacterized protein	Kinesin light chain 2 OS=Homo sapiens GN=KLC2 PE=1 SV=1	Kinesin light chain 2 OS=Mus musculus GN=Klc2 PE=1 SV=1	KLC2	0.633			1.566			0.869			1.00188	0.960579	0.935049	1.04049	1.06574	1.04891	0.958479	0.978143	0.965635	0.631809			1.50505			0.906645			1.66003		2.38213		0.696866
F1RU59	981	S	Uncharacterized protein	GLTSCR1-like protein OS=Homo sapiens GN=GLTSCR1L PE=1 SV=2	GLTSCR1-like protein OS=Mus musculus GN=Gltscr1l PE=2 SV=2	GLTSCR1L	0.426	0.483		2.112	2.064		0.595	0.612
F1RU59	676	S	Uncharacterized protein	GLTSCR1-like protein OS=Homo sapiens GN=GLTSCR1L PE=1 SV=2	GLTSCR1-like protein OS=Mus musculus GN=Gltscr1l PE=2 SV=2	GLTSCR1L	0.566			1.961			0.595
F1RU72	1425	S	Uncharacterized protein	THO complex subunit 2 OS=Homo sapiens GN=THOC2 PE=1 SV=2	THO complex subunit 2 OS=Mus musculus GN=Thoc2 PE=1 SV=1	THOC2	0.631	0.518	0.397	1.747	1.99	2.203	0.717	0.642	0.452	1.12014	1.07608	1.06617	0.830803	0.812202	0.851011	1.01405	1.06802	1.03714	0.563322	0.481376	0.372361	2.10278	2.45013	2.58868	0.707063	0.601115	0.435815	4.09497	0.0014227	5.03973	0.00233635	0.812537	0.328125
F1RU72	1398	S	Uncharacterized protein	THO complex subunit 2 OS=Homo sapiens GN=THOC2 PE=1 SV=2	THO complex subunit 2 OS=Mus musculus GN=Thoc2 PE=1 SV=1	THOC2	0.537		0.566	1.949		1.891	0.632		0.587	1.12014	1.07608	1.06617	0.830803	0.812202	0.851011	1.01405	1.06802	1.03714	0.479404		0.530872	2.34592		2.22206	0.623241		0.56598	3.84116	0.00786782	4.52152	0.00882008	0.849527	0.147136
F1RU83	103	S	Putative pre-mRNA-splicing factor ATP-dependent RNA helicase DHX16			DHX16
F1RU83	164	S	Putative pre-mRNA-splicing factor ATP-dependent RNA helicase DHX16			DHX16	0.692	0.604		1.719	1.84		0.685	0.684
F1RUA7	149	S	Uncharacterized protein	NF-kappa-B-activating protein OS=Homo sapiens GN=NKAP PE=1 SV=1	NF-kappa-B-activating protein OS=Mus musculus GN=Nkap PE=2 SV=1	NKAP	0.396	0.321	0.487	2.356	2.449	1.957	0.416	0.446	0.597	1.01017	1.05926	1.04498	1.00686	1.03406	0.995632	0.984422	0.915687	0.933996	0.392013	0.303042	0.466037	2.33994	2.36834	1.96559	0.422583	0.487066	0.639189	4.30895	0.00147661	5.74792	0.00212489	0.749654	0.186305
F1RUA7	9	S	Uncharacterized protein	NF-kappa-B-activating protein OS=Homo sapiens GN=NKAP PE=1 SV=1	NF-kappa-B-activating protein OS=Mus musculus GN=Nkap PE=2 SV=1	NKAP	0.624	0.605	0.587	1.768	1.843	1.845	0.705	0.682	0.609	1.01017	1.05926	1.04498	1.00686	1.03406	0.995632	0.984422	0.915687	0.933996	0.617718	0.571155	0.561732	1.75595	1.7823	1.85309	0.716157	0.744796	0.652037	2.55152	1.08868e-05	3.0797	2.35729e-05	0.828496	0.0274992
F1RUF9	354	S	Uncharacterized protein	Transcription factor SOX-4 OS=Homo sapiens GN=SOX4 PE=1 SV=1	Transcription factor SOX-4 OS=Mus musculus GN=Sox4 PE=1 SV=2	SOX4	0.479	0.469	0.498	2.146	2.143	2.08	0.518	0.561	0.474	1.22636	1.21141	1.15965	0.552994	0.64162	0.620349	1.20203	1.12237	1.23221	0.390587	0.387151	0.42944	3.88069	3.33998	3.35295	0.430937	0.499835	0.384674	8.03806	0.00252845	8.75896	0.00309475	0.917695	0.400102
F1RUG1	325	T	Uncharacterized protein	Guanine nucleotide-binding protein-like 3-like protein OS=Homo sapiens GN=GNL3L PE=1 SV=1	Guanine nucleotide-binding protein-like 3-like protein OS=Mus musculus GN=Gnl3l PE=1 SV=1	GNL3L	0.737	0.715	0.858	1.571	1.512	1.293	0.772	0.853	0.871	1.04149	1.0553	1.05875	0.911583	1.00432	1.03187	0.992805	0.945534	1.00714	0.70764	0.67753	0.810391	1.72338	1.5055	1.25307	0.777595	0.902136	0.864823	1.76139	0.0340644	2.04137	0.0229424	0.862847	0.100574
F1RUG2	116	S	Uncharacterized protein	FYVE, RhoGEF and PH domain-containing protein 1 OS=Homo sapiens GN=FGD1 PE=1 SV=2	FYVE, RhoGEF and PH domain-containing protein 1 OS=Mus musculus GN=Fgd1 PE=1 SV=2	FGD1	0.637		0.641	1.77		1.65	0.692		0.74
F1RUG2	135	S	Uncharacterized protein	FYVE, RhoGEF and PH domain-containing protein 1 OS=Homo sapiens GN=FGD1 PE=1 SV=2	FYVE, RhoGEF and PH domain-containing protein 1 OS=Mus musculus GN=Fgd1 PE=1 SV=2	FGD1	0.434	0.46	0.439	2.269	2.124	2.089	0.454	0.584	0.519
F1RUG8	271	T	Uncharacterized protein	Constitutive coactivator of PPAR-gamma-like protein 2 OS=Homo sapiens GN=FAM120C PE=2 SV=3	Constitutive coactivator of PPAR-gamma-like protein 2 OS=Mus musculus GN=Fam120c PE=1 SV=3	---	0.885			1.087			1.046				0.961998			1.11701			0.931624
F1RUI7	260	S	Lysine-specific demethylase 5C			KDM5C	0.848	0.771	0.796	1.52	1.555	1.545	0.713	0.765	0.696			1.02437			0.932963			1.04449			0.777062			1.65601			0.666356	2.48518		2.13112		1.16614
F1RUI9	360	S	Uncharacterized protein	Melanoma-associated antigen D4 OS=Homo sapiens GN=MAGED4 PE=1 SV=3	Melanoma-associated antigen D1 OS=Mus musculus GN=Maged1 PE=1 SV=1	LOC100523107	0.825			1.426			0.813			1.09715	1.07256	1.07295	0.72862	0.88494	0.75241	1.11999	1.03499	1.17987	0.751949			1.95712			0.7259			2.69613		2.60273		1.03589
F1RUI9	169	S	Uncharacterized protein	Melanoma-associated antigen D4 OS=Homo sapiens GN=MAGED4 PE=1 SV=3	Melanoma-associated antigen D1 OS=Mus musculus GN=Maged1 PE=1 SV=1	LOC100523107	0.671	0.677	0.685	1.747	1.498	1.581	0.681	0.9	0.763	1.09715	1.07256	1.07295	0.72862	0.88494	0.75241	1.11999	1.03499	1.17987	0.611585	0.631198	0.638426	2.39768	1.69277	2.10125	0.608041	0.869571	0.64668	2.91471	0.0126155	3.29134	0.019502	0.88557	0.425059
F1RUJ3	758	S	Uncharacterized protein	Ataxin-1 OS=Homo sapiens GN=ATXN1 PE=1 SV=2	Ataxin-1 OS=Mus musculus GN=Atxn1 PE=1 SV=2	ATXN1	0.766	0.698	0.831	1.481	1.53	1.233	0.82	0.854	0.952
F1RUK9	221	S	Uncharacterized protein	Protein FAM208B OS=Homo sapiens GN=FAM208B PE=1 SV=1	Protein FAM208B OS=Mus musculus GN=Fam208b PE=1 SV=2	FAM208B		0.45			2.224			0.51		0.784178		0.654991	1.43545		1.61125	0.798906		0.706397
F1RUK9	387	S	Uncharacterized protein	Protein FAM208B OS=Homo sapiens GN=FAM208B PE=1 SV=1	Protein FAM208B OS=Mus musculus GN=Fam208b PE=1 SV=2	FAM208B	0.512	0.5	0.585	2.065	2.021	1.869	0.557	0.633	0.589	0.784178		0.654991	1.43545		1.61125	0.798906		0.706397	0.652913		0.893142	1.43857		1.15997	0.697203		0.833808	1.69727	0.115286	1.68076	0.106086	1.00983	0.962643
F1RUL1	161	Y	Uncharacterized protein	Splicing factor 45 OS=Homo sapiens GN=RBM17 PE=1 SV=1	Splicing factor 45 OS=Mus musculus GN=Rbm17 PE=1 SV=1	RBM17	0.597	0.53	0.603	1.826	1.937	1.831	0.683	0.674	0.608	0.97732	0.888382	0.968471	1.0154	1.21282	1.06297	0.980463	0.959654	0.929955	0.610854	0.59659	0.622631	1.7983	1.59711	1.72254	0.69661	0.702337	0.653795	2.49322	0.0019623	2.79658	0.00249875	0.891527	0.0238362
F1RUL1	155	S	Uncharacterized protein	Splicing factor 45 OS=Homo sapiens GN=RBM17 PE=1 SV=1	Splicing factor 45 OS=Mus musculus GN=Rbm17 PE=1 SV=1	RBM17	0.673	0.597	0.659	1.679	1.763	1.689	0.736	0.755	0.686	0.97732	0.888382	0.968471	1.0154	1.21282	1.06297	0.980463	0.959654	0.929955	0.688618	0.672008	0.680454	1.65353	1.45364	1.58895	0.750666	0.786742	0.73767	2.06416	0.00349972	2.3008	0.00419317	0.897147	0.0245872
F1RUL1	223	S	Uncharacterized protein	Splicing factor 45 OS=Homo sapiens GN=RBM17 PE=1 SV=1	Splicing factor 45 OS=Mus musculus GN=Rbm17 PE=1 SV=1	RBM17	0.548	0.594	0.52	1.977	1.879	1.996	0.597	0.661	0.531	0.97732	0.888382	0.968471	1.0154	1.21282	1.06297	0.980463	0.959654	0.929955	0.560717	0.668631	0.536929	1.94701	1.54929	1.87776	0.608896	0.68879	0.570996	2.87585	0.00717716	3.04259	0.00585455	0.945199	0.557934
F1RUL8	70	S	Uncharacterized protein	Ras association domain-containing protein 6 OS=Homo sapiens GN=RASSF6 PE=1 SV=1	Ras association domain-containing protein 6 OS=Mus musculus GN=Rassf6 PE=1 SV=1	RASSF6	0.787	0.665	0.917	1.573	1.581	1.182	0.723	0.842	0.921
F1RUM5	539	T	Uncharacterized protein	Transcription initiation factor TFIID subunit 3 OS=Homo sapiens GN=TAF3 PE=1 SV=1	Transcription initiation factor TFIID subunit 3 OS=Mus musculus GN=Taf3 PE=1 SV=2	TAF3	0.582	0.488	0.501	1.947	2.057	1.886	0.593	0.614	0.65
F1RUM5	47	S	Uncharacterized protein	Transcription initiation factor TFIID subunit 3 OS=Homo sapiens GN=TAF3 PE=1 SV=1	Transcription initiation factor TFIID subunit 3 OS=Mus musculus GN=Taf3 PE=1 SV=2	TAF3	0.658	0.672	0.67	1.695	1.652	1.717	0.737	0.776	0.652
F1RUN1	692	S	Uncharacterized protein	USP6 N-terminal-like protein OS=Homo sapiens GN=USP6NL PE=1 SV=3	USP6 N-terminal-like protein OS=Mus musculus GN=Usp6nl PE=1 SV=2	USP6NL	0.371	0.421	0.678	2.371	2.272	1.658	0.425	0.496	0.698
F1RUN1	502	S	Uncharacterized protein	USP6 N-terminal-like protein OS=Homo sapiens GN=USP6NL PE=1 SV=3	USP6 N-terminal-like protein OS=Mus musculus GN=Usp6nl PE=1 SV=2	USP6NL	0.684	0.566		1.674	1.966		0.731	0.616
F1RUN1	505	Y	Uncharacterized protein	USP6 N-terminal-like protein OS=Homo sapiens GN=USP6NL PE=1 SV=3	USP6 N-terminal-like protein OS=Mus musculus GN=Usp6nl PE=1 SV=2	USP6NL	0.684	0.566		1.674	1.966		0.731	0.616
F1RUP2	103	S	Uncharacterized protein	G-rich sequence factor 1 OS=Homo sapiens GN=GRSF1 PE=1 SV=3	G-rich sequence factor 1 OS=Mus musculus GN=Grsf1 PE=1 SV=2	GRSF1	0.69	0.63	0.738	1.752	1.725	1.567	0.659	0.755	0.73	0.968993	1.09896	0.951039	1.10705	1.03022	1.2126	0.930401	0.928677	0.833065	0.712079	0.573269	0.775993	1.58258	1.6744	1.29226	0.708296	0.812984	0.876282	1.89745	0.0139694	2.20694	0.00771186	0.859765	0.223509
F1RUR3	272	S	Uncharacterized protein	Cyclin-Y OS=Homo sapiens GN=CCNY PE=1 SV=2	Cyclin-Y OS=Mus musculus GN=Ccny PE=1 SV=1	CCNY	0.819	0.799	0.793	1.361	1.375	1.312	0.873	0.888	0.914
F1RUR8	762	S	Uncharacterized protein	Partitioning defective 3 homolog OS=Homo sapiens GN=PARD3 PE=1 SV=2	Partitioning defective 3 homolog OS=Mus musculus GN=Pard3 PE=1 SV=2	PARD3	0.715			1.453			0.889			0.967565	1.04049	0.916643	1.01666	0.956223	1.06196	1.01441	1.00152	1.01439	0.738968			1.42919			0.876368			1.63081		1.93404		0.843217
F1RUR8	651	S	Uncharacterized protein	Partitioning defective 3 homolog OS=Homo sapiens GN=PARD3 PE=1 SV=2	Partitioning defective 3 homolog OS=Mus musculus GN=Pard3 PE=1 SV=2	PARD3	0.704	0.611	0.722	1.538	1.836	1.547	0.828	0.682	0.761	0.967565	1.04049	0.916643	1.01666	0.956223	1.06196	1.01441	1.00152	1.01439	0.7276	0.587224	0.787656	1.5128	1.92005	1.45674	0.816235	0.680968	0.750207	2.17566	0.020531	2.32563	0.0137574	0.935512	0.539462
F1RUR8	803	S	Uncharacterized protein	Partitioning defective 3 homolog OS=Homo sapiens GN=PARD3 PE=1 SV=2	Partitioning defective 3 homolog OS=Mus musculus GN=Pard3 PE=1 SV=2	PARD3	0.644			1.72			0.728			0.967565	1.04049	0.916643	1.01666	0.956223	1.06196	1.01441	1.00152	1.01439	0.665588			1.69182			0.717656			2.35742		2.54184		0.927448
F1RUR8	653	S	Uncharacterized protein	Partitioning defective 3 homolog OS=Homo sapiens GN=PARD3 PE=1 SV=2	Partitioning defective 3 homolog OS=Mus musculus GN=Pard3 PE=1 SV=2	PARD3	0.655			1.726			0.715			0.967565	1.04049	0.916643	1.01666	0.956223	1.06196	1.01441	1.00152	1.01439	0.676957			1.69772			0.70484			2.40866		2.50787		0.96044
F1RUT1	86	S	Uncharacterized protein	RNA-binding protein 4 OS=Homo sapiens GN=RBM4 PE=1 SV=1	RNA-binding protein 4 OS=Mus musculus GN=Rbm4 PE=1 SV=1	---	0.861	0.785	0.804	1.369	1.431	1.345	0.828	0.855	0.874	1.01413	0.966366		0.901433	0.910088		1.07727	1.1101		0.849005	0.812322		1.51869	1.57237		0.76861	0.770204		2.00873	0.0218942	1.8606	0.00367608	1.07962	0.184628
F1RUW3	63	S	Uncharacterized protein	Mitochondrial import receptor subunit TOM6 homolog OS=Homo sapiens GN=TOMM6 PE=1 SV=1	Mitochondrial import receptor subunit TOM6 homolog OS=Mus musculus GN=Tomm6 PE=3 SV=1	TOMM6	0.77	0.875		1.322	1.335		0.952	0.851		1.01122	1.03835	0.892126	1.02425	1.01974	0.976927	0.967549	0.947463	1.12139	0.761455	0.842685		1.2907	1.30915		0.98393	0.898188		1.38134	0.0649984	1.62071	0.0421051	0.852306	0.143209
F1RUX3	633	S	Protein-serine/threonine kinase			ADRBK1	0.709	0.694	0.589	1.733	1.693	2.035	0.658	0.723	0.434	1.10874	1.09481		0.839914	0.753608		1.04705	1.13043		0.639465	0.6339		2.06331	2.24653		0.628432	0.639581		3.39889	0.0376344	3.3846	0.0381996	1.00422	0.722133
F1RUX7	392	S	Uncharacterized protein	Cell cycle checkpoint control protein RAD9A OS=Homo sapiens GN=RAD9A PE=1 SV=1	Cell cycle checkpoint control protein RAD9A OS=Mus musculus GN=Rad9a PE=1 SV=1	RAD9A	0.609	0.76		1.807	1.344		0.686	0.949		1.17225			0.762573			1.05974			0.519513			2.36961			0.647327			3.66061		4.56121		0.802551
F1RUY4	74	S	Uncharacterized protein	Forkhead box protein P4 OS=Homo sapiens GN=FOXP4 PE=1 SV=1	Forkhead box protein P4 OS=Mus musculus GN=Foxp4 PE=1 SV=1	FOXP4	0.552			1.93			0.633				1.09652	0.948032		0.965024	1.0327		0.967666	1.01094
F1RUY4	592	S	Uncharacterized protein	Forkhead box protein P4 OS=Homo sapiens GN=FOXP4 PE=1 SV=1	Forkhead box protein P4 OS=Mus musculus GN=Foxp4 PE=1 SV=1	FOXP4	0.562	0.65	0.609	1.879	1.822	1.749	0.669	0.658	0.678		1.09652	0.948032		0.965024	1.0327		0.967666	1.01094		0.592786	0.642383		1.88804	1.69362		0.679986	0.670666	2.6518	0.0548307	2.89973	0.0406753	0.914498	0.248955
F1RUZ7	592	S	Uncharacterized protein	Membrane-associated phosphatidylinositol transfer protein 1 OS=Homo sapiens GN=PITPNM1 PE=1 SV=4	Membrane-associated phosphatidylinositol transfer protein 1 OS=Mus musculus GN=Pitpnm1 PE=1 SV=1	PITPNM1	0.794			1.456			0.815				1.03411	1.03301		1.04558	1.03824		0.992924	0.931821
F1RV33	61	S	Uncharacterized protein	Protein FAM104A OS=Homo sapiens GN=FAM104A PE=1 SV=2		FAM104A	0.858	0.722	0.799	1.437	1.519	1.418	0.774	0.841	0.809
F1RV35	293	S	Uncharacterized protein	Cdc42 effector protein 4 OS=Homo sapiens GN=CDC42EP4 PE=1 SV=1	Cdc42 effector protein 4 OS=Mus musculus GN=Cdc42ep4 PE=1 SV=1	CDC42EP4										0.793273	0.812313		1.45921	1.39333		0.768848	0.825078
F1RV70	311	S	NADPH:adrenodoxin oxidoreductase, mitochondrial			FDXR	0.704	0.647	0.701	1.578	1.631	1.528	0.793	0.818	0.798	0.718136	0.793399	0.811986	1.28885	1.29575	1.14849	1.00777	0.923904	1.01951	0.980316	0.815479	0.863316	1.22435	1.25873	1.33044	0.786882	0.885374	0.782732	1.55338	0.000604186	1.43413	0.00470125	1.08315	0.323173
F1RV84	2585	S	Uncharacterized protein	Zinc finger protein 40 OS=Homo sapiens GN=HIVEP1 PE=1 SV=3	Zinc finger protein 40 OS=Mus musculus GN=Hivep1 PE=1 SV=1	HIVEP1	0.773	0.704		1.534	1.657		0.768	0.744
F1RVC9	40	T	Uncharacterized protein	Heterogeneous nuclear ribonucleoprotein D0 OS=Homo sapiens GN=HNRNPD PE=1 SV=1	Heterogeneous nuclear ribonucleoprotein D0 OS=Mus musculus GN=Hnrnpd PE=1 SV=2	---	0.716	0.857	0.822	1.497	1.248	1.34	0.852	0.939	0.862	1.02613	1.03949	1.00744	1.10272	1.02859	1.02286	0.919592	0.922684	1.00096	0.697766	0.824442	0.815929	1.35755	1.21331	1.31005	0.926498	1.01768	0.861172	1.3834	0.00454079	1.65983	0.000955639	0.833455	0.0639928
F1RVD2	260	S	Uncharacterized protein	Enolase-phosphatase E1 OS=Homo sapiens GN=ENOPH1 PE=1 SV=1	Enolase-phosphatase E1 OS=Mus musculus GN=Enoph1 PE=1 SV=1	ENOPH1	0.809	0.811	0.705	1.16	1.481	1.45	1.054	0.789	0.866	1.10116	1.11297	1.08011	0.886273	0.735746	0.887679	1.01156	1.1533	1.06978	0.734677	0.728682	0.652712	1.30885	2.01292	1.63347	1.04196	0.684122	0.809511	1.95428	0.0389695	2.34172	0.0412361	0.834548	0.312516
F1RVD4	1163	S	Uncharacterized protein	Protein transport protein Sec31A OS=Homo sapiens GN=SEC31A PE=1 SV=3	Protein transport protein Sec31A OS=Mus musculus GN=Sec31a PE=1 SV=2	SEC31A	0.803			1.331			0.915			1.21079	1.22564	1.17162	0.5776	0.561497	0.666079	1.19908	1.19462	1.18039	0.663206			2.30436			0.763086			3.01979		3.47458		0.86911
F1RVD4	804	S	Uncharacterized protein	Protein transport protein Sec31A OS=Homo sapiens GN=SEC31A PE=1 SV=3	Protein transport protein Sec31A OS=Mus musculus GN=Sec31a PE=1 SV=2	SEC31A	0.502	0.453	0.404	1.999	2.094	2.173	0.621	0.616	0.473	1.21079	1.22564	1.17162	0.5776	0.561497	0.666079	1.19908	1.19462	1.18039	0.414607	0.369602	0.34482	3.46087	3.72932	3.26237	0.517898	0.515646	0.400714	7.28779	0.00101361	9.25801	0.00154493	0.787187	0.10158
F1RVD4	806	Y	Uncharacterized protein	Protein transport protein Sec31A OS=Homo sapiens GN=SEC31A PE=1 SV=3	Protein transport protein Sec31A OS=Mus musculus GN=Sec31a PE=1 SV=2	SEC31A	0.642			1.687			0.758			1.21079	1.22564	1.17162	0.5776	0.561497	0.666079	1.19908	1.19462	1.18039	0.530234			2.92071			0.632152			4.62026		5.50833		0.838777
F1RVD4	801	S	Uncharacterized protein	Protein transport protein Sec31A OS=Homo sapiens GN=SEC31A PE=1 SV=3	Protein transport protein Sec31A OS=Mus musculus GN=Sec31a PE=1 SV=2	SEC31A	0.566	0.55	0.537	1.866	1.914	1.897	0.675	0.674	0.607	1.21079	1.22564	1.17162	0.5776	0.561497	0.666079	1.19908	1.19462	1.18039	0.467465	0.448744	0.458338	3.23061	3.40874	2.84801	0.562932	0.564197	0.514235	5.78017	0.00369537	6.90217	0.00369079	0.837442	0.0235553
F1RVD6	506	S	Uncharacterized protein	Protein lin-54 homolog OS=Homo sapiens GN=LIN54 PE=1 SV=3	Protein lin-54 homolog OS=Mus musculus GN=Lin54 PE=2 SV=2	LIN54	0.773	0.668	0.646	1.59	1.758	1.663	0.721	0.694	0.722
F1RVD6	181	S	Uncharacterized protein	Protein lin-54 homolog OS=Homo sapiens GN=LIN54 PE=1 SV=3	Protein lin-54 homolog OS=Mus musculus GN=Lin54 PE=2 SV=2	LIN54	0.544	0.407	0.396	2.024	2.264	2.221	0.56	0.518	0.437
F1RVF8	535	S	Uncharacterized protein	Centromere protein C OS=Homo sapiens GN=CENPC PE=1 SV=2	Centromere protein C OS=Mus musculus GN=Cenpc PE=1 SV=2	CENPC	0.904			1.086			1.03			1.00651	1.04409	1.04757	0.944459	0.888967	0.886892	1.04487	0.931899	1.06917	0.898156			1.14986			0.985769			1.16647		1.28025		0.911122
F1RVF8	743	T	Uncharacterized protein	Centromere protein C OS=Homo sapiens GN=CENPC PE=1 SV=2	Centromere protein C OS=Mus musculus GN=Cenpc PE=1 SV=2	CENPC	0.699			1.659			0.729			1.00651	1.04409	1.04757	0.944459	0.888967	0.886892	1.04487	0.931899	1.06917	0.694481			1.75656			0.697695			2.51767		2.52931		0.995394
F1RVF8	334	S	Uncharacterized protein	Centromere protein C OS=Homo sapiens GN=CENPC PE=1 SV=2	Centromere protein C OS=Mus musculus GN=Cenpc PE=1 SV=2	CENPC										1.00651	1.04409	1.04757	0.944459	0.888967	0.886892	1.04487	0.931899	1.06917
F1RVF8	292	S	Uncharacterized protein	Centromere protein C OS=Homo sapiens GN=CENPC PE=1 SV=2	Centromere protein C OS=Mus musculus GN=Cenpc PE=1 SV=2	CENPC	0.456	0.415	0.397	2.147	2.193	2.155	0.537	0.569	0.496	1.00651	1.04409	1.04757	0.944459	0.888967	0.886892	1.04487	0.931899	1.06917	0.453052	0.397476	0.378972	2.27326	2.46691	2.42983	0.51394	0.610581	0.463909	4.51389	3.08453e-05	5.83164	0.000229354	0.774034	0.0902108
F1RVH1	593	S	Uncharacterized protein	Protein AF-10 OS=Homo sapiens GN=MLLT10 PE=1 SV=2	Protein AF-10 OS=Mus musculus GN=Mllt10 PE=1 SV=2	MLLT10	0.669	0.617	0.58	1.789	1.798	1.831	0.647	0.707	0.627
F1RVH1	583	S	Uncharacterized protein	Protein AF-10 OS=Homo sapiens GN=MLLT10 PE=1 SV=2	Protein AF-10 OS=Mus musculus GN=Mllt10 PE=1 SV=2	MLLT10	0.545			1.915			0.653
F1RVK3	192	S	Acyl-CoA-binding domain-containing protein 5			ACBD5	0.783	0.621	0.738	1.511	1.811	1.464	0.779	0.693	0.825	0.841842	0.803591	0.785206	1.22358	1.39344	1.39307	0.940042	0.836941	0.804751	0.930103	0.772781	0.939881	1.2349	1.29966	1.05092	0.828686	0.828015	1.02516	1.33694	0.0394279	1.35672	0.0310998	0.985421	0.885901
F1RVK3	188	S	Acyl-CoA-binding domain-containing protein 5			ACBD5	0.637	0.627		1.763	1.658		0.697	0.814		0.841842	0.803591	0.785206	1.22358	1.39344	1.39307	0.940042	0.836941	0.804751	0.756674	0.780248		1.44086	1.18986		0.741456	0.972589		1.5348	0.115931	1.71168	0.140927	0.896663	0.583206
F1RVL9	320	S	Uncharacterized protein	Nuclear transcription factor Y subunit alpha OS=Homo sapiens GN=NFYA PE=1 SV=2	Nuclear transcription factor Y subunit alpha OS=Mus musculus GN=Nfya PE=1 SV=2	LOC100627430											0.724535	0.645001		1.55911	1.58916		0.759295	0.737495
F1RVS1	63	S	Uncharacterized protein	Cap-specific mRNA (nucleoside-2'-O-)-methyltransferase 1 OS=Homo sapiens GN=CMTR1 PE=1 SV=1	Cap-specific mRNA (nucleoside-2'-O-)-methyltransferase 1 OS=Mus musculus GN=Cmtr1 PE=1 SV=1	---	0.875	0.778		1.273	1.374		0.898	0.909		1.08142	1.19326	1.17771	0.894138	0.762216	0.80982	1.01271	1.01435	1.02714	0.80912	0.651994		1.42372	1.80264		0.886733	0.896138		1.80964	0.163236	2.20815	0.0970545	0.819529	0.288263
F1RVS1	53	S	Uncharacterized protein	Cap-specific mRNA (nucleoside-2'-O-)-methyltransferase 1 OS=Homo sapiens GN=CMTR1 PE=1 SV=1	Cap-specific mRNA (nucleoside-2'-O-)-methyltransferase 1 OS=Mus musculus GN=Cmtr1 PE=1 SV=1	---	0.674	0.638	0.617	1.658	1.779	1.734	0.754	0.703	0.685	1.08142	1.19326	1.17771	0.894138	0.762216	0.80982	1.01271	1.01435	1.02714	0.623254	0.534668	0.523896	1.8543	2.33398	2.14122	0.74454	0.693053	0.666898	3.00762	0.00830434	3.76348	0.0059255	0.799157	0.0260766
F1RVS1	66	S	Uncharacterized protein	Cap-specific mRNA (nucleoside-2'-O-)-methyltransferase 1 OS=Homo sapiens GN=CMTR1 PE=1 SV=1	Cap-specific mRNA (nucleoside-2'-O-)-methyltransferase 1 OS=Mus musculus GN=Cmtr1 PE=1 SV=1	---	0.681	0.607	0.613	1.693	1.812	1.794	0.718	0.705	0.633	1.08142	1.19326	1.17771	0.894138	0.762216	0.80982	1.01271	1.01435	1.02714	0.629727	0.508689	0.5205	1.89344	2.37728	2.21531	0.708992	0.695024	0.616272	3.21045	0.00712243	3.9098	0.00502776	0.821128	0.0715302
F1RVS1	51	S	Uncharacterized protein	Cap-specific mRNA (nucleoside-2'-O-)-methyltransferase 1 OS=Homo sapiens GN=CMTR1 PE=1 SV=1	Cap-specific mRNA (nucleoside-2'-O-)-methyltransferase 1 OS=Mus musculus GN=Cmtr1 PE=1 SV=1	---	0.713	0.701	0.558	1.745	1.546	1.964	0.644	0.838	0.525	1.08142	1.19326	1.17771	0.894138	0.762216	0.80982	1.01271	1.01435	1.02714	0.659318	0.587465	0.473799	1.9516	2.0283	2.42523	0.63592	0.826142	0.511126	3.24608	0.00218152	3.72265	0.00424766	0.87198	0.482291
F1RVS1	55	S	Uncharacterized protein	Cap-specific mRNA (nucleoside-2'-O-)-methyltransferase 1 OS=Homo sapiens GN=CMTR1 PE=1 SV=1	Cap-specific mRNA (nucleoside-2'-O-)-methyltransferase 1 OS=Mus musculus GN=Cmtr1 PE=1 SV=1	---	0.658		0.625	1.776		1.721	0.669		0.689	1.08142	1.19326	1.17771	0.894138	0.762216	0.80982	1.01271	1.01435	1.02714	0.608459		0.530689	1.98627		2.12516	0.660606		0.670792	3.08806	0.0309198	3.60922	0.0078385	0.855602	0.239906
F1RVS8	382	S	Uncharacterized protein	Mitochondrial carrier homolog 1 OS=Homo sapiens GN=MTCH1 PE=1 SV=1	Mitochondrial carrier homolog 1 OS=Mus musculus GN=Mtch1 PE=1 SV=1	MTCH1	0.772	0.79	0.8	1.45	1.205	1.346	0.841	1.036	0.875	0.820722	0.899026	1.08697	1.29464	1.2448	1.1616	0.89433	0.876624	0.759795	0.940635	0.878729	0.735988	1.12	0.968028	1.15874	0.940369	1.18181	1.15163	0.991743	0.929797	1.27058	0.0518271	0.780545	0.0724379
F1RVS8	381	S	Uncharacterized protein	Mitochondrial carrier homolog 1 OS=Homo sapiens GN=MTCH1 PE=1 SV=1	Mitochondrial carrier homolog 1 OS=Mus musculus GN=Mtch1 PE=1 SV=1	MTCH1	0.751			1.461			0.851			0.820722	0.899026	1.08697	1.29464	1.2448	1.1616	0.89433	0.876624	0.759795	0.915048			1.1285			0.95155			1.18596		1.23326		0.961639
F1RVT5	26	S	Uncharacterized protein	Solute carrier family 35 member B1 OS=Homo sapiens GN=SLC35B1 PE=1 SV=1	Solute carrier family 35 member B1 OS=Mus musculus GN=Slc35b1 PE=1 SV=1	SLC35B1	0.691			1.492			0.879
F1RVV6	593	S	Uncharacterized protein	Protein HID1 OS=Homo sapiens GN=HID1 PE=1 SV=1	Protein HID1 OS=Mus musculus GN=Hid1 PE=1 SV=1	HID1	0.637			1.721			0.734					1.13515			0.699596			1.17569
F1RVW3	861	S	Uncharacterized protein	Exonuclease mut-7 homolog OS=Homo sapiens GN=EXD3 PE=2 SV=3	Werner syndrome ATP-dependent helicase homolog OS=Mus musculus GN=Wrn PE=1 SV=3	EXD3	0.663			1.753			0.684
F1RVX2	87	S	Uncharacterized protein	Hematological and neurological expressed 1 protein OS=Homo sapiens GN=HN1 PE=1 SV=3	Hematological and neurological expressed 1 protein OS=Mus musculus GN=Hn1 PE=1 SV=3	HN1	0.449	0.256	0.422	1.962	2.674	2.283	0.702	0.318	0.355		0.723248	0.609946		1.50667	1.73174		0.778559	0.62757		0.353959	0.691864		1.77477	1.31833		0.408447	0.565674	3.17527	0.106347	2.95758	0.0778738	1.07361	0.871379
F1RVX2	88	S	Uncharacterized protein	Hematological and neurological expressed 1 protein OS=Homo sapiens GN=HN1 PE=1 SV=3	Hematological and neurological expressed 1 protein OS=Mus musculus GN=Hn1 PE=1 SV=3	HN1	0.484	0.264	0.531	2.071	2.502	1.971	0.576	0.453	0.544		0.723248	0.609946		1.50667	1.73174		0.778559	0.62757		0.36502	0.870569		1.66061	1.13816		0.581844	0.866836	1.93195	0.187346	2.26514	0.164653	0.852906	0.756742
F1RVX3	146	S	Uncharacterized protein	ADP-ribosylation factor-binding protein GGA3 OS=Homo sapiens GN=GGA3 PE=1 SV=1	ADP-ribosylation factor-binding protein GGA3 OS=Mus musculus GN=Gga3 PE=1 SV=2	GGA3	0.571	0.559	0.552	1.841	2.027	1.946	0.694	0.573	0.549			0.989663			1.07951			0.930291			0.557766			1.80267			0.590138	3.05465		3.23194		0.945145
F1RVX6	656	S	Uncharacterized protein	Nuclear pore complex protein Nup85 OS=Homo sapiens GN=NUP85 PE=1 SV=1	Nuclear pore complex protein Nup85 OS=Mus musculus GN=Nup85 PE=1 SV=1	NUP85		0.736			1.473			0.866		1.15614	1.14345	1.10634	0.756595	0.754165	0.856984	1.11623	1.0662	1.11134		0.643667			1.95315			0.812232		2.40467		3.03442		0.792467
F1RVY0	15	S	Uncharacterized protein	Torsin-4A OS=Homo sapiens GN=TOR4A PE=1 SV=2	Torsin-4A OS=Mus musculus GN=Tor4a PE=2 SV=1	TOR4A	0.965	0.824		1.04	1.32		1.013	0.91
F1RVY8	240	S	Uncharacterized protein	RING finger protein unkempt homolog OS=Homo sapiens GN=UNK PE=1 SV=2	RING finger protein unkempt homolog OS=Mus musculus GN=Unk PE=1 SV=1	UNK	0.775		0.67	1.457		1.522	0.832		0.832	0.662285		1.15493	1.67544		0.821691	0.690773		1.03612	1.17019		0.580124	0.869621		1.85228	1.20445		0.802996	1.3559	0.598934	1.55509	0.502339	0.871912	0.757162
F1RVY8	385	S	Uncharacterized protein	RING finger protein unkempt homolog OS=Homo sapiens GN=UNK PE=1 SV=2	RING finger protein unkempt homolog OS=Mus musculus GN=Unk PE=1 SV=1	UNK	0.675	0.557		1.753	1.968		0.672	0.624		0.662285		1.15493	1.67544		0.821691	0.690773		1.03612	1.0192			1.04629			0.972823			1.07552		1.02658		1.04767
F1RVZ0	596	S	Uncharacterized protein	Tripartite motif-containing protein 47 OS=Homo sapiens GN=TRIM47 PE=1 SV=2	Tripartite motif-containing protein 47 OS=Mus musculus GN=Trim47 PE=1 SV=2	TRIM47	1.042	0.976	1.029	1.046	1.093	0.985	0.937	0.956	1
F1RVZ2	405	S	Uncharacterized protein	Fas-binding factor 1 OS=Homo sapiens GN=FBF1 PE=1 SV=2	Fas-binding factor 1 OS=Mus musculus GN=Fbf1 PE=1 SV=1	FBF1	0.452	0.402	0.517	2.18	2.238	1.992	0.513	0.544	0.537
F1RVZ2	380	S	Uncharacterized protein	Fas-binding factor 1 OS=Homo sapiens GN=FBF1 PE=1 SV=2	Fas-binding factor 1 OS=Mus musculus GN=Fbf1 PE=1 SV=1	FBF1	0.635			1.576			0.859
F1RW10	406	S	Uncharacterized protein	BRCA1-A complex subunit Abraxas OS=Homo sapiens GN=FAM175A PE=1 SV=2	BRCA1-A complex subunit Abraxas OS=Mus musculus GN=Fam175a PE=1 SV=1	FAM175A		0.644			1.719			0.748
F1RW49	166	S	Uncharacterized protein	Polycystin-2 OS=Homo sapiens GN=PKD2 PE=1 SV=3	Polycystin-2 OS=Mus musculus GN=Pkd2 PE=1 SV=2	PKD2	0.555	0.586	0.41	1.998	1.846	2.218	0.574	0.696	0.426	0.941094	0.941287		1.18483	1.13733		0.884745	0.893058		0.589739	0.622552		1.68632	1.6231		0.648775	0.779345		2.31733	0.0180803	2.72989	0.0046828	0.848872	0.334313
F1RW49	76	S	Uncharacterized protein	Polycystin-2 OS=Homo sapiens GN=PKD2 PE=1 SV=3	Polycystin-2 OS=Mus musculus GN=Pkd2 PE=1 SV=2	PKD2			0.667			1.646			0.72	0.941094	0.941287		1.18483	1.13733		0.884745	0.893058
F1RW68	333	S	Uncharacterized protein	G protein-regulated inducer of neurite outgrowth 3 OS=Homo sapiens GN=GPRIN3 PE=2 SV=2	G protein-regulated inducer of neurite outgrowth 3 OS=Mus musculus GN=Gprin3 PE=1 SV=1	GPRIN3	0.744		0.74	1.427		1.395	0.888		0.886	0.732671	0.9258	0.677635	1.47146	1.18144	1.59726	0.813056	0.907967	0.699663	1.01546		1.09203	0.969785		0.873373	1.09218		1.26632	0.781496	0.156264	0.874572	0.171377	0.893575	0.365014
F1RW68	536	S	Uncharacterized protein	G protein-regulated inducer of neurite outgrowth 3 OS=Homo sapiens GN=GPRIN3 PE=2 SV=2	G protein-regulated inducer of neurite outgrowth 3 OS=Mus musculus GN=Gprin3 PE=1 SV=1	GPRIN3	0.35		0.458	2.404		2.093	0.416		0.497	0.732671	0.9258	0.677635	1.47146	1.18144	1.59726	0.813056	0.907967	0.699663	0.477704		0.67588	1.63375		1.31037	0.51165		0.710342	2.40928	0.063255	2.55215	0.0595932	0.94402	0.830137
F1RW68	337	S	Uncharacterized protein	G protein-regulated inducer of neurite outgrowth 3 OS=Homo sapiens GN=GPRIN3 PE=2 SV=2	G protein-regulated inducer of neurite outgrowth 3 OS=Mus musculus GN=Gprin3 PE=1 SV=1	GPRIN3	0.882	0.772	0.78	1.244	1.439	1.317	0.915	0.861	0.921	0.732671	0.9258	0.677635	1.47146	1.18144	1.59726	0.813056	0.907967	0.699663	1.20381	0.833873	1.15106	0.845419	1.218	0.824539	1.12538	0.948272	1.31635	0.851905	0.372782	0.905672	0.592127	0.940633	0.691271
F1RW68	216	T	Uncharacterized protein	G protein-regulated inducer of neurite outgrowth 3 OS=Homo sapiens GN=GPRIN3 PE=2 SV=2	G protein-regulated inducer of neurite outgrowth 3 OS=Mus musculus GN=Gprin3 PE=1 SV=1	GPRIN3	0.743			1.432			0.883			0.732671	0.9258	0.677635	1.47146	1.18144	1.59726	0.813056	0.907967	0.699663	1.0141			0.973183			1.08603			0.896096		0.959655		0.933769
F1RW68	96	S	Uncharacterized protein	G protein-regulated inducer of neurite outgrowth 3 OS=Homo sapiens GN=GPRIN3 PE=2 SV=2	G protein-regulated inducer of neurite outgrowth 3 OS=Mus musculus GN=Gprin3 PE=1 SV=1	GPRIN3	0.686			1.545			0.839			0.732671	0.9258	0.677635	1.47146	1.18144	1.59726	0.813056	0.907967	0.699663	0.9363			1.04998			1.03191			1.01751		1.12141		0.907347
F1RW68	336	T	Uncharacterized protein	G protein-regulated inducer of neurite outgrowth 3 OS=Homo sapiens GN=GPRIN3 PE=2 SV=2	G protein-regulated inducer of neurite outgrowth 3 OS=Mus musculus GN=Gprin3 PE=1 SV=1	GPRIN3	0.744		0.74	1.427		1.395	0.888		0.886	0.732671	0.9258	0.677635	1.47146	1.18144	1.59726	0.813056	0.907967	0.699663	1.01546		1.09203	0.969785		0.873373	1.09218		1.26632	0.781496	0.156264	0.874572	0.171377	0.893575	0.365014
F1RWC6	231	T	Uncharacterized protein	Rho GTPase-activating protein 12 OS=Homo sapiens GN=ARHGAP12 PE=1 SV=1	Rho GTPase-activating protein 12 OS=Mus musculus GN=Arhgap12 PE=1 SV=2	ARHGAP12	0.799	0.727	0.867	1.324	1.594	1.309	0.923	0.775	0.849		1.16525	1.16329		0.661591	0.616629		1.14705	1.23259		0.623903	0.745299		2.40934	2.12283		0.675646	0.688793	3.32164	0.0569504	3.31009	0.0308286	1.00349	0.975065
F1RWC6	240	S	Uncharacterized protein	Rho GTPase-activating protein 12 OS=Homo sapiens GN=ARHGAP12 PE=1 SV=1	Rho GTPase-activating protein 12 OS=Mus musculus GN=Arhgap12 PE=1 SV=2	ARHGAP12	0.806	0.687	0.807	1.44	1.722	1.42	0.818	0.705	0.801		1.16525	1.16329		0.661591	0.616629		1.14705	1.23259		0.589576	0.693721		2.60282	2.30284		0.61462	0.64985	3.87962	0.0494586	3.8227	0.0332154	1.01489	0.887897
F1RWC6	165	S	Uncharacterized protein	Rho GTPase-activating protein 12 OS=Homo sapiens GN=ARHGAP12 PE=1 SV=1	Rho GTPase-activating protein 12 OS=Mus musculus GN=Arhgap12 PE=1 SV=2	ARHGAP12											1.16525	1.16329		0.661591	0.616629		1.14705	1.23259
F1RWD4	306	S	Uncharacterized protein	Zinc finger E-box-binding homeobox 1 OS=Homo sapiens GN=ZEB1 PE=1 SV=2	Zinc finger E-box-binding homeobox 1 OS=Mus musculus GN=Zeb1 PE=1 SV=1	---	0.861	0.792	0.706	1.38	1.468	1.666	0.819	0.818	0.666
F1RWE1	535	S	Uncharacterized protein	Junctional protein associated with coronary artery disease OS=Homo sapiens GN=KIAA1462 PE=1 SV=3	Junctional protein associated with coronary artery disease OS=Mus musculus GN=Jcad PE=1 SV=2	KIAA1462	0.657	0.642	0.619	1.848	1.708	1.742	0.608	0.759	0.676	1.03363	0.927619	0.885522	0.987356	1.17149	1.06955	0.922355	0.915075	1.03522	0.635621	0.692094	0.699023	1.87166	1.45797	1.62872	0.659182	0.82944	0.653	2.31523	0.00669981	2.44647	0.012906	0.946357	0.584343
F1RWE1	60	S	Uncharacterized protein	Junctional protein associated with coronary artery disease OS=Homo sapiens GN=KIAA1462 PE=1 SV=3	Junctional protein associated with coronary artery disease OS=Mus musculus GN=Jcad PE=1 SV=2	KIAA1462	0.678		0.626	1.772		1.631	0.653		0.772	1.03363	0.927619	0.885522	0.987356	1.17149	1.06955	0.922355	0.915075	1.03522	0.655938		0.706928	1.79469		1.52493	0.70797		0.745734	2.28356	0.0862222	2.43577	0.0782538	0.937513	0.298336
F1RWE1	1022	S	Uncharacterized protein	Junctional protein associated with coronary artery disease OS=Homo sapiens GN=KIAA1462 PE=1 SV=3	Junctional protein associated with coronary artery disease OS=Mus musculus GN=Jcad PE=1 SV=2	KIAA1462	0.608	0.579		1.702	1.585		0.777	0.919		1.03363	0.927619	0.885522	0.987356	1.17149	1.06955	0.922355	0.915075	1.03522	0.588216	0.624178		1.7238	1.35298		0.842409	1.00429		1.66609	0.145531	2.53776	0.122209	0.65652	0.145131
F1RWE1	489	S	Uncharacterized protein	Junctional protein associated with coronary artery disease OS=Homo sapiens GN=KIAA1462 PE=1 SV=3	Junctional protein associated with coronary artery disease OS=Mus musculus GN=Jcad PE=1 SV=2	KIAA1462	0.744	0.962	0.66	1.354	0.975	1.626	0.949	1.067	0.744	1.03363	0.927619	0.885522	0.987356	1.17149	1.06955	0.922355	0.915075	1.03522	0.71979	1.03706	0.745323	1.37134	0.832272	1.52026	1.02889	1.16602	0.718686	1.2781	0.346476	1.48825	0.181285	0.858793	0.460308
F1RWE1	469	S	Uncharacterized protein	Junctional protein associated with coronary artery disease OS=Homo sapiens GN=KIAA1462 PE=1 SV=3	Junctional protein associated with coronary artery disease OS=Mus musculus GN=Jcad PE=1 SV=2	KIAA1462	0.698	0.645	0.689	1.787	1.741	1.663	0.622	0.729	0.683	1.03363	0.927619	0.885522	0.987356	1.17149	1.06955	0.922355	0.915075	1.03522	0.675287	0.695328	0.778073	1.80988	1.48614	1.55485	0.674361	0.796656	0.659762	2.27657	0.00484312	2.2576	0.00712258	1.00841	0.917179
F1RWI3	437	S	Uncharacterized protein	Telomeric repeat-binding factor 1 OS=Homo sapiens GN=TERF1 PE=1 SV=3	Telomeric repeat-binding factor 1 OS=Mus musculus GN=Terf1 PE=1 SV=1	TERF1		0.789			1.451			0.834			0.856153	0.831434		1.41691	1.29589		0.764124	0.859296		0.921565			1.02406			1.09145		0.93826		1.11122		0.844352
F1RWI3	369	T	Uncharacterized protein	Telomeric repeat-binding factor 1 OS=Homo sapiens GN=TERF1 PE=1 SV=3	Telomeric repeat-binding factor 1 OS=Mus musculus GN=Terf1 PE=1 SV=1	TERF1	0.649	0.581	0.478	1.642	1.666	1.788	0.791	0.85	0.761		0.856153	0.831434		1.41691	1.29589		0.764124	0.859296		0.678617	0.57491		1.1758	1.37975		1.11238	0.885609	1.27906	0.210463	2.03868	0.0553199	0.627393	0.145018
F1RWI7	356	S	Uncharacterized protein	Double-stranded RNA-binding protein Staufen homolog 2 OS=Homo sapiens GN=STAU2 PE=1 SV=1	Double-stranded RNA-binding protein Staufen homolog 2 OS=Mus musculus GN=Stau2 PE=1 SV=1	STAU2	0.544			1.941			0.633				0.917528	0.894359		1.23475	1.10436		0.868541	0.992512
F1RWJ1	272	S	Uncharacterized protein	Oxysterol-binding protein-related protein 7 OS=Homo sapiens GN=OSBPL7 PE=1 SV=1	Oxysterol-binding protein-related protein 6 OS=Mus musculus GN=Osbpl6 PE=1 SV=1	OSBPL7	0.92			1.276			0.853
F1RWL1	417	T	Uncharacterized protein	F-box/LRR-repeat protein 20 OS=Homo sapiens GN=FBXL20 PE=1 SV=2	F-box/LRR-repeat protein 20 OS=Mus musculus GN=Fbxl20 PE=1 SV=3	FBXL20	0.822	0.767	0.824	1.382	1.458	1.315	0.853	0.849	0.883	1.14985	1.03136	1.09225	0.820089	0.876505	0.831632	1.05265	1.05514	1.10712	0.714878	0.743677	0.754406	1.68518	1.66342	1.58123	0.810332	0.804635	0.797567	2.04343	0.00124877	2.22771	0.000344117	0.917277	0.0220376
F1RWL2	1051	T	Uncharacterized protein	Mediator of RNA polymerase II transcription subunit 1 OS=Homo sapiens GN=MED1 PE=1 SV=4	Mediator of RNA polymerase II transcription subunit 1 OS=Mus musculus GN=Med1 PE=1 SV=2	MED1	0.581	0.499	0.546	1.925	2.08	1.986	0.612	0.585	0.517	1.14376	1.09553	1.08909	0.805172	0.806352	0.933238	1.04682	1.05313	0.985164	0.507974	0.455487	0.501336	2.39079	2.57952	2.12808	0.584629	0.555486	0.524786	4.26355	0.00459892	4.84599	0.00431538	0.87981	0.0493354
F1RWL2	675	S	Uncharacterized protein	Mediator of RNA polymerase II transcription subunit 1 OS=Homo sapiens GN=MED1 PE=1 SV=4	Mediator of RNA polymerase II transcription subunit 1 OS=Mus musculus GN=Med1 PE=1 SV=2	MED1	0.359	0.51		2.262	2.127		0.529	0.535		1.14376	1.09553	1.08909	0.805172	0.806352	0.933238	1.04682	1.05313	0.985164	0.313877	0.465528		2.80934	2.63781		0.505341	0.508008		5.37538	0.0245834	6.98885	0.00257157	0.769137	0.366075
F1RWL2	1445	S	Uncharacterized protein	Mediator of RNA polymerase II transcription subunit 1 OS=Homo sapiens GN=MED1 PE=1 SV=4	Mediator of RNA polymerase II transcription subunit 1 OS=Mus musculus GN=Med1 PE=1 SV=2	MED1	0.583	0.592	0.173	1.851	1.777	2.631	0.672	0.748	0.26	1.14376	1.09553	1.08909	0.805172	0.806352	0.933238	1.04682	1.05313	0.985164	0.509722	0.540377	0.158848	2.29889	2.20375	2.81922	0.641946	0.710262	0.263915	4.53051	0.00189043	6.05639	0.00174563	0.748054	0.504561
F1RWL2	1213	T	Uncharacterized protein	Mediator of RNA polymerase II transcription subunit 1 OS=Homo sapiens GN=MED1 PE=1 SV=4	Mediator of RNA polymerase II transcription subunit 1 OS=Mus musculus GN=Med1 PE=1 SV=2	MED1										1.14376	1.09553	1.08909	0.805172	0.806352	0.933238	1.04682	1.05313	0.985164
F1RWL3	693	T	Uncharacterized protein	Cyclin-dependent kinase 12 OS=Homo sapiens GN=CDK12 PE=1 SV=2	Cyclin-dependent kinase 12 OS=Mus musculus GN=Cdk12 PE=1 SV=2	CDK12	0.704	0.702	0.655	1.594	1.564	1.67	0.781	0.822	0.709
F1RWL3	424	S	Uncharacterized protein	Cyclin-dependent kinase 12 OS=Homo sapiens GN=CDK12 PE=1 SV=2	Cyclin-dependent kinase 12 OS=Mus musculus GN=Cdk12 PE=1 SV=2	CDK12	0.573	0.386	0.571	1.803	2.267	1.86	0.723	0.535	0.61
F1RWL3	358	S	Uncharacterized protein	Cyclin-dependent kinase 12 OS=Homo sapiens GN=CDK12 PE=1 SV=2	Cyclin-dependent kinase 12 OS=Mus musculus GN=Cdk12 PE=1 SV=2	CDK12	0.665			1.796			0.645
F1RWL3	682	S	Uncharacterized protein	Cyclin-dependent kinase 12 OS=Homo sapiens GN=CDK12 PE=1 SV=2	Cyclin-dependent kinase 12 OS=Mus musculus GN=Cdk12 PE=1 SV=2	CDK12	0.709	0.59	0.714	1.663	1.858	1.623	0.717	0.682	0.698
F1RWL3	699	Y	Uncharacterized protein	Cyclin-dependent kinase 12 OS=Homo sapiens GN=CDK12 PE=1 SV=2	Cyclin-dependent kinase 12 OS=Mus musculus GN=Cdk12 PE=1 SV=2	CDK12	0.653	0.658	0.673	1.706	1.728	1.635	0.733	0.729	0.725
F1RWL3	894	T	Uncharacterized protein	Cyclin-dependent kinase 12 OS=Homo sapiens GN=CDK12 PE=1 SV=2	Cyclin-dependent kinase 12 OS=Mus musculus GN=Cdk12 PE=1 SV=2	CDK12	0.612	0.464	0.522	1.957	2.171	2.06	0.557	0.542	0.471
F1RWL3	335	S	Uncharacterized protein	Cyclin-dependent kinase 12 OS=Homo sapiens GN=CDK12 PE=1 SV=2	Cyclin-dependent kinase 12 OS=Mus musculus GN=Cdk12 PE=1 SV=2	CDK12		0.436			2.211			0.534
F1RWL3	216	S	Uncharacterized protein	Cyclin-dependent kinase 12 OS=Homo sapiens GN=CDK12 PE=1 SV=2	Cyclin-dependent kinase 12 OS=Mus musculus GN=Cdk12 PE=1 SV=2	CDK12	0.569	0.505		1.836	2.066		0.699	0.59
F1RWP0	244	S	Uncharacterized protein	Phosphoribosyl pyrophosphate synthase-associated protein 1 OS=Homo sapiens GN=PRPSAP1 PE=1 SV=2	Phosphoribosyl pyrophosphate synthase-associated protein 1 OS=Mus musculus GN=Prpsap1 PE=1 SV=1	PRPSAP1	0.709	0.684	0.698	1.707	1.741	1.653	0.681	0.693	0.685	1.10741	1.13396	1.04975	0.834014	0.81661	0.969248	1.01808	1.01995	0.969823	0.640235	0.603194	0.664922	2.04673	2.13198	1.70545	0.668904	0.679442	0.706315	2.86381	0.00985291	3.08338	0.00856113	0.928791	0.0950346
F1RWS8	197	S	Uncharacterized protein	U2 small nuclear ribonucleoprotein A' OS=Homo sapiens GN=SNRPA1 PE=1 SV=2	U2 small nuclear ribonucleoprotein A' OS=Mus musculus GN=Snrpa1 PE=1 SV=2	SNRPA1	0.728			1.603			0.75			0.958767	1.01587	0.914505	1.07117	1.06877	1.13176	0.932021	0.975705	0.882979	0.759308			1.49649			0.804703			1.85968		1.97086		0.943588
F1RWW3	128	S	Uncharacterized protein	SWI/SNF-related matrix-associated actin-dependent regulator of chromatin subfamily A containing DEAD/H box 1 OS=Homo sapiens GN=SMARCAD1 PE=1 SV=2	SWI/SNF-related matrix-associated actin-dependent regulator of chromatin subfamily A containing DEAD/H box 1 OS=Mus musculus GN=Smarcad1 PE=1 SV=2	SMARCAD1	0.737		0.839	1.664		1.377	0.691		0.812	1.14882	1.13734	1.07756	0.635952	0.844765	0.833877	1.19703	1.01109	1.09458	0.641529		0.778614	2.61655		1.65132	0.577264		0.741834	3.23545	0.192954	3.00524	0.202126	1.0766	0.684886
F1RWX6	567	T	Uncharacterized protein	RNA-binding protein 10 OS=Homo sapiens GN=RBM10 PE=1 SV=3	RNA-binding protein 10 OS=Mus musculus GN=Rbm10 PE=1 SV=1	RBM10	0.491			2.151			0.503			0.897684	1.0039	0.921609	1.16184	1.05887	1.08899	0.947669	0.962184	0.939053	0.546963			1.85137			0.530776			3.48805		3.38482		1.0305
F1RWX6	596	S	Uncharacterized protein	RNA-binding protein 10 OS=Homo sapiens GN=RBM10 PE=1 SV=3	RNA-binding protein 10 OS=Mus musculus GN=Rbm10 PE=1 SV=1	RBM10	0.783	0.749	0.772	1.397	1.489	1.42	0.876	0.841	0.832	0.897684	1.0039	0.921609	1.16184	1.05887	1.08899	0.947669	0.962184	0.939053	0.872244	0.746088	0.837666	1.2024	1.40622	1.30396	0.924373	0.874053	0.885999	1.45751	0.0153102	1.59307	0.00401143	0.914906	0.16993
F1RWX6	594	S	Uncharacterized protein	RNA-binding protein 10 OS=Homo sapiens GN=RBM10 PE=1 SV=3	RNA-binding protein 10 OS=Mus musculus GN=Rbm10 PE=1 SV=1	RBM10	0.722			1.566			0.787			0.897684	1.0039	0.921609	1.16184	1.05887	1.08899	0.947669	0.962184	0.939053	0.804292			1.34786			0.830459			1.62303		1.67584		0.968491
F1RWX6	655	S	Uncharacterized protein	RNA-binding protein 10 OS=Homo sapiens GN=RBM10 PE=1 SV=3	RNA-binding protein 10 OS=Mus musculus GN=Rbm10 PE=1 SV=1	RBM10			0.698			1.549			0.781	0.897684	1.0039	0.921609	1.16184	1.05887	1.08899	0.947669	0.962184	0.939053			0.757371			1.42241			0.831689	1.71027		1.87809		0.910642
F1RWX6	581	S	Uncharacterized protein	RNA-binding protein 10 OS=Homo sapiens GN=RBM10 PE=1 SV=3	RNA-binding protein 10 OS=Mus musculus GN=Rbm10 PE=1 SV=1	RBM10	0.705	0.683	0.672	1.656	1.677	1.639	0.726	0.747	0.722	0.897684	1.0039	0.921609	1.16184	1.05887	1.08899	0.947669	0.962184	0.939053	0.785354	0.680345	0.72916	1.42532	1.58377	1.50506	0.76609	0.776359	0.76886	1.95307	0.00372981	2.05669	0.000345345	0.949617	0.328802
F1RWY1	85	S	Uncharacterized protein	Protein Jade-3 OS=Homo sapiens GN=JADE3 PE=1 SV=1	Protein Jade-3 OS=Mus musculus GN=Jade3 PE=1 SV=1	JADE3	0.794	0.743	0.758	1.518	1.591	1.55	0.762	0.762	0.725	0.933792			1.05689			1.00848			0.850297			1.43629			0.755589			1.90089		1.68916		1.12534
F1RWZ2	236	Y	Uncharacterized protein	Serine/threonine-protein kinase PRP4 homolog OS=Homo sapiens GN=PRPF4B PE=1 SV=3	Serine/threonine-protein kinase PRP4 homolog OS=Mus musculus GN=Prpf4b PE=1 SV=3	---	0.723	0.668	0.755	1.632	1.649	1.535	0.731	0.783	0.742	1.02019	1.05329	1.07938	1.00091	1.04197	0.895094	0.982259	0.934547	1.0164	0.708689	0.634201	0.699475	1.63052	1.58257	1.7149	0.744203	0.837839	0.730025	2.13142	7.99844e-05	2.41289	0.000121597	0.88335	0.102648
F1RX16	131	S	Uncharacterized protein	ATP-dependent RNA helicase DDX3X OS=Homo sapiens GN=DDX3X PE=1 SV=3	ATP-dependent RNA helicase DDX3X OS=Mus musculus GN=Ddx3x PE=1 SV=3	DDX3X	0.613			1.379			1.046			0.955672	1.01024	0.98489	1.0141	1.0517	0.971014	0.989035	0.953735	1.05153	0.641433			1.35983			1.0576			1.28577		2.11998		0.606501
F1RX16	593	S	Uncharacterized protein	ATP-dependent RNA helicase DDX3X OS=Homo sapiens GN=DDX3X PE=1 SV=3	ATP-dependent RNA helicase DDX3X OS=Mus musculus GN=Ddx3x PE=1 SV=3	DDX3X	0.933	0.689		1.199	1.583		0.907	0.819		0.955672	1.01024	0.98489	1.0141	1.0517	0.971014	0.989035	0.953735	1.05153	0.976276	0.682017		1.18233	1.50518		0.917056	0.858729		1.51342	0.207407	1.62065	0.143669	0.933837	0.758569
F1RX16	543	S	Uncharacterized protein	ATP-dependent RNA helicase DDX3X OS=Homo sapiens GN=DDX3X PE=1 SV=3	ATP-dependent RNA helicase DDX3X OS=Mus musculus GN=Ddx3x PE=1 SV=3	DDX3X	0.696	0.731		1.714	1.328		0.686	0.99		0.955672	1.01024	0.98489	1.0141	1.0517	0.971014	0.989035	0.953735	1.05153	0.728283	0.723592		1.69017	1.26271		0.693605	1.03802		1.70526	0.161788	2.03384	0.176582	0.838444	0.565707
F1RX46	104	S	Uncharacterized protein	La-related protein 4B OS=Homo sapiens GN=LARP4B PE=1 SV=3	La-related protein 4B OS=Mus musculus GN=Larp4b PE=1 SV=2	LARP4B	0.717	0.792	0.669	1.528	1.548	1.591	0.825	0.752	0.768
F1RX46	596	S	Uncharacterized protein	La-related protein 4B OS=Homo sapiens GN=LARP4B PE=1 SV=3	La-related protein 4B OS=Mus musculus GN=Larp4b PE=1 SV=2	LARP4B	0.592	0.529	0.533	1.765	1.898	1.946	0.738	0.705	0.565
F1RX46	708	S	Uncharacterized protein	La-related protein 4B OS=Homo sapiens GN=LARP4B PE=1 SV=3	La-related protein 4B OS=Mus musculus GN=Larp4b PE=1 SV=2	LARP4B	0.724	0.641	0.709	1.529	1.629	1.469	0.817	0.824	0.845
F1RX64	118	T	Uncharacterized protein	RNA-binding protein with multiple splicing OS=Homo sapiens GN=RBPMS PE=1 SV=1	RNA-binding protein with multiple splicing OS=Mus musculus GN=Rbpms PE=1 SV=2	RBPMS	0.657	0.6	0.782	1.691	1.724	1.472	0.742	0.784	0.776			1.05362			0.931478			1.01928			0.742201			1.58028			0.761325	2.0757		2.12919		0.974881
F1RX70	277	S	Uncharacterized protein	Werner syndrome ATP-dependent helicase OS=Homo sapiens GN=WRN PE=1 SV=2	Werner syndrome ATP-dependent helicase homolog OS=Mus musculus GN=Wrn PE=1 SV=3	WRN	0.906			1.107			1.009			0.938106	0.941975		1.18685	1.20819		0.88563	0.869566		0.965775			0.932723			1.1393			0.818679		0.965776		0.847691
F1RX74	189	S	Uncharacterized protein	Heterogeneous nuclear ribonucleoproteins A2/B1 OS=Homo sapiens GN=HNRNPA2B1 PE=1 SV=2	Heterogeneous nuclear ribonucleoproteins A2/B1 OS=Mus musculus GN=Hnrnpa2b1 PE=1 SV=2	HNRNPA2B1	0.809	0.708	0.673	1.418	1.485	1.606	0.834	0.88	0.752	0.976887	1.01119	1.02944	1.01481	1.00059	0.923842	1.00989	0.990994	1.03958	0.828141	0.700165	0.653752	1.39731	1.48413	1.73839	0.825828	0.887997	0.72337	1.89555	0.00897033	2.11719	0.00598328	0.895315	0.296764
F1RX74	85	S	Uncharacterized protein	Heterogeneous nuclear ribonucleoproteins A2/B1 OS=Homo sapiens GN=HNRNPA2B1 PE=1 SV=2	Heterogeneous nuclear ribonucleoproteins A2/B1 OS=Mus musculus GN=Hnrnpa2b1 PE=1 SV=2	HNRNPA2B1	1.012	0.866	0.911	1.064	1.261	0.99	0.95	0.92	1.104	0.976887	1.01119	1.02944	1.01481	1.00059	0.923842	1.00989	0.990994	1.03958	1.03594	0.856417	0.884945	1.04847	1.26026	1.07161	0.940692	0.92836	1.06197	1.1533	0.145337	1.21713	0.0846593	0.947555	0.508145
F1RX74	102	S	Uncharacterized protein	Heterogeneous nuclear ribonucleoproteins A2/B1 OS=Homo sapiens GN=HNRNPA2B1 PE=1 SV=2	Heterogeneous nuclear ribonucleoproteins A2/B1 OS=Mus musculus GN=Hnrnpa2b1 PE=1 SV=2	HNRNPA2B1	1.109	1.13	1.138	0.704	0.673	0.562	1.167	1.16	1.292	0.976887	1.01119	1.02944	1.01481	1.00059	0.923842	1.00989	0.990994	1.03958	1.13524	1.1175	1.10545	0.693726	0.672606	0.608329	1.15557	1.17054	1.24281	0.553294	0.00014174	0.588014	0.00132801	0.940953	0.109813
F1RX81	190	S	Uncharacterized protein	Catenin beta-1 OS=Homo sapiens GN=CTNNB1 PE=1 SV=1	Catenin beta-1 OS=Mus musculus GN=Ctnnb1 PE=1 SV=1	LOC100627228	0.756			1.415			0.886
F1RX81	550	T	Uncharacterized protein	Catenin beta-1 OS=Homo sapiens GN=CTNNB1 PE=1 SV=1	Catenin beta-1 OS=Mus musculus GN=Ctnnb1 PE=1 SV=1	LOC100627228	0.606			1.817			0.681
F1RXA9	873	S	Uncharacterized protein	Mediator of RNA polymerase II transcription subunit 24 OS=Homo sapiens GN=MED24 PE=1 SV=1	Mediator of RNA polymerase II transcription subunit 24 OS=Mus musculus GN=Med24 PE=1 SV=1	LOC100511100	0.52			1.917			0.674			1.26557	1.16935	1.12488	0.638662	0.838202	0.818964	1.08779	0.987554	1.06625	0.410881			3.00159			0.619605			4.84435		7.30525		0.663133
F1RXC8	205	S	Uncharacterized protein	Male-specific lethal 1 homolog OS=Homo sapiens GN=MSL1 PE=1 SV=3	Male-specific lethal 1 homolog OS=Mus musculus GN=Msl1 PE=1 SV=1	MSL1	0.826	0.634	0.618	1.618	1.723	1.846	0.649	0.753	0.58	0.979812	1.00662	0.910563	1.11811	1.15075	1.02723	0.910388	0.860999	1.0545	0.843019	0.629832	0.678701	1.44708	1.49728	1.79707	0.712883	0.874565	0.550023	2.21824	0.00410204	2.20372	0.00504432	1.00659	0.969299
F1RXC8	442	S	Uncharacterized protein	Male-specific lethal 1 homolog OS=Homo sapiens GN=MSL1 PE=1 SV=3	Male-specific lethal 1 homolog OS=Mus musculus GN=Msl1 PE=1 SV=1	MSL1	0.696	0.763	0.715	1.7	1.487	1.611	0.697	0.829	0.709	0.979812	1.00662	0.910563	1.11811	1.15075	1.02723	0.910388	0.860999	1.0545	0.710341	0.757984	0.785228	1.52042	1.2922	1.5683	0.765608	0.962835	0.672356	1.82477	0.00545337	1.944	0.0103529	0.938668	0.628741
F1RXC8	126	S	Uncharacterized protein	Male-specific lethal 1 homolog OS=Homo sapiens GN=MSL1 PE=1 SV=3	Male-specific lethal 1 homolog OS=Mus musculus GN=Msl1 PE=1 SV=1	MSL1	0.59	0.626	0.524	1.703	1.59	1.789	0.793	0.87	0.719	0.979812	1.00662	0.910563	1.11811	1.15075	1.02723	0.910388	0.860999	1.0545	0.602157	0.621884	0.575468	1.5231	1.3817	1.74158	0.871057	1.01045	0.681839	1.81262	0.00818909	2.58203	0.010961	0.702014	0.113282
F1RXD5	243	S	Uncharacterized protein	Copine-3 OS=Homo sapiens GN=CPNE3 PE=1 SV=1	Copine-3 OS=Mus musculus GN=Cpne3 PE=1 SV=2	CPNE3	0.726		0.767	1.632		1.565	0.728		0.704	0.990701	0.972225	0.981576	1.03158	1.0297	1.03277	0.961987	0.963514	0.972309	0.732814		0.781396	1.58204		1.51534	0.756767		0.72405	2.09167	0.00835199	2.04554	0.00404237	1.02255	0.63309
F1RXG7	13	S	Uncharacterized protein	Coatomer subunit epsilon OS=Homo sapiens GN=COPE PE=1 SV=3	Coatomer subunit epsilon OS=Mus musculus GN=Cope PE=1 SV=3	---	0.566			1.844			0.695					0.666904			1.655			0.651976
F1RXM4	128	S	Uncharacterized protein	PWWP domain-containing protein MUM1L1 OS=Homo sapiens GN=MUM1L1 PE=2 SV=1	PWWP domain-containing protein MUM1L1 OS=Mus musculus GN=Mum1l1 PE=1 SV=2	MUM1L1	0.836	0.738	0.817	1.32	1.319	1.317	0.893	0.991	0.887	0.890248	0.945473	1.09579	0.932164	1.11668	0.847947	1.12615	0.947053	1.06394	0.939064	0.780561	0.745579	1.41606	1.18118	1.55316	0.792968	1.0464	0.833693	1.55267	0.025084	1.68359	0.0186639	0.922239	0.52355
F1RXM4	237	S	Uncharacterized protein	PWWP domain-containing protein MUM1L1 OS=Homo sapiens GN=MUM1L1 PE=2 SV=1	PWWP domain-containing protein MUM1L1 OS=Mus musculus GN=Mum1l1 PE=1 SV=2	MUM1L1	0.817		0.84	0.837		1.055	1.32		1.108	0.890248	0.945473	1.09579	0.932164	1.11668	0.847947	1.12615	0.947053	1.06394	0.917722		0.766568	0.89791		1.24418	1.17214		1.04141	0.967719	0.872995	1.27181	0.394463	0.7609	0.120412
F1RXM4	417	S	Uncharacterized protein	PWWP domain-containing protein MUM1L1 OS=Homo sapiens GN=MUM1L1 PE=2 SV=1	PWWP domain-containing protein MUM1L1 OS=Mus musculus GN=Mum1l1 PE=1 SV=2	MUM1L1	0.922			1.286			0.842			0.890248	0.945473	1.09579	0.932164	1.11668	0.847947	1.12615	0.947053	1.06394	1.03567			1.37959			0.747681			1.84515		1.33207		1.38517
F1RXS1	1031	S	Uncharacterized protein	Gamma-tubulin complex component 6 OS=Homo sapiens GN=TUBGCP6 PE=1 SV=3	Gamma-tubulin complex component 6 OS=Mus musculus GN=Tubgcp6 PE=1 SV=1	TUBGCP6	0.553			2.001			0.571			1.07828		0.948341	0.937337		1.09914	0.985761		0.94846	0.512854			2.13477			0.579248			3.68542		4.16253		0.88538
F1RXT5	1227	Y	Uncharacterized protein	Myotubularin-related protein 5 OS=Homo sapiens GN=SBF1 PE=1 SV=3	Myotubularin-related protein 5 OS=Mus musculus GN=Sbf1 PE=1 SV=2	SBF1	1.644			1.051			0.38			1.13639	1.05679		0.815455	0.876649		1.04415	1.05827		1.44669			1.28885			0.363933			3.54145		0.890898		3.97515
F1RXT5	1233	S	Uncharacterized protein	Myotubularin-related protein 5 OS=Homo sapiens GN=SBF1 PE=1 SV=3	Myotubularin-related protein 5 OS=Mus musculus GN=Sbf1 PE=1 SV=2	SBF1	1.644			1.051			0.38			1.13639	1.05679		0.815455	0.876649		1.04415	1.05827		1.44669			1.28885			0.363933			3.54145		0.890898		3.97515
F1RXT8	494	S	Uncharacterized protein	Condensin-2 complex subunit H2 OS=Homo sapiens GN=NCAPH2 PE=1 SV=1	Condensin-2 complex subunit H2 OS=Mus musculus GN=Ncaph2 PE=1 SV=1	NCAPH2	0.971		0.895	1.213		1.037	0.86		1.075	1.06786		0.998438	0.737743		1.09013	1.17791		0.911718	0.909296		0.896401	1.6442		0.951264	0.730105		1.17909	1.35945	0.505603	1.43738	0.458436	0.945788	0.855776
F1RXT8	199	S	Uncharacterized protein	Condensin-2 complex subunit H2 OS=Homo sapiens GN=NCAPH2 PE=1 SV=1	Condensin-2 complex subunit H2 OS=Mus musculus GN=Ncaph2 PE=1 SV=1	NCAPH2	0.707		0.861	1.596		0.961	0.777		1.176	1.06786		0.998438	0.737743		1.09013	1.17791		0.911718	0.662073		0.862347	2.16335		0.881547	0.659641		1.28987	1.56188	0.547839	1.99742	0.442632	0.781949	0.621136
F1RXY3	48	S	Uncharacterized protein	Arginine/serine-rich protein PNISR OS=Homo sapiens GN=PNISR PE=1 SV=2	Arginine/serine-rich protein PNISR OS=Mus musculus GN=Pnisr PE=1 SV=1	PNISR	0.603		0.684	1.831		1.681	0.672		0.672
F1RXZ5	202	S	Uncharacterized protein	TFIIH basal transcription factor complex helicase XPB subunit OS=Homo sapiens GN=ERCC3 PE=1 SV=1	TFIIH basal transcription factor complex helicase XPB subunit OS=Mus musculus GN=Ercc3 PE=2 SV=1	ERCC3	0.677			1.629			0.776			1.08962			0.874432			1.02255			0.621319			1.86292			0.758887			2.45481		2.99834		0.818723
F1RXZ6	265	S	Uncharacterized protein	Myc box-dependent-interacting protein 1 OS=Homo sapiens GN=BIN1 PE=1 SV=1	Myc box-dependent-interacting protein 1 OS=Mus musculus GN=Bin1 PE=1 SV=1	BIN1	0.696			1.527			0.844				1.00635	0.884114		0.958902	1.26354		1.03043	0.84343
F1RY37	399	S	Uncharacterized protein	Protein CBFA2T1 OS=Homo sapiens GN=RUNX1T1 PE=1 SV=2	Protein CBFA2T1 OS=Mus musculus GN=Runx1t1 PE=2 SV=1	RUNX1T1		0.65	0.771		1.644	1.358		0.804	0.891
F1RY40	391	S	Uncharacterized protein	RNA-binding protein 12B OS=Homo sapiens GN=RBM12B PE=1 SV=2	RNA-binding protein 12B-A OS=Mus musculus GN=Rbm12b1 PE=1 SV=2	RBM12B	1.06	1.009		0.888	0.833		1.055	1.142		1.04092	1.06155	1.03331	0.910962	0.874396	0.836669	1.08234	1.02952	1.14958	1.01833	0.950496		0.974794	0.952658		0.974743	1.10925		0.924884	0.448412	0.978985	0.65126	0.944738	0.5477
F1RY40	280	S	Uncharacterized protein	RNA-binding protein 12B OS=Homo sapiens GN=RBM12B PE=1 SV=2	RNA-binding protein 12B-A OS=Mus musculus GN=Rbm12b1 PE=1 SV=2	RBM12B	1.062	0.873	0.967	1.019	1.231	1.03	0.941	0.938	1.014	1.04092	1.06155	1.03331	0.910962	0.874396	0.836669	1.08234	1.02952	1.14958	1.02025	0.822382	0.935826	1.1186	1.40783	1.23107	0.869415	0.9111	0.882062	1.41123	0.046642	1.35237	0.0391677	1.04352	0.572693
F1RY40	561	S	Uncharacterized protein	RNA-binding protein 12B OS=Homo sapiens GN=RBM12B PE=1 SV=2	RNA-binding protein 12B-A OS=Mus musculus GN=Rbm12b1 PE=1 SV=2	RBM12B	0.835	0.814	0.826	1.322	1.199	1.258	0.892	1.02	0.933	1.04092	1.06155	1.03331	0.910962	0.874396	0.836669	1.08234	1.02952	1.14958	0.802176	0.766803	0.799371	1.45121	1.37123	1.50358	0.824143	0.990748	0.811602	1.64707	0.00216639	1.8266	0.00182593	0.901716	0.272655
F1RY40	377	S	Uncharacterized protein	RNA-binding protein 12B OS=Homo sapiens GN=RBM12B PE=1 SV=2	RNA-binding protein 12B-A OS=Mus musculus GN=Rbm12b1 PE=1 SV=2	RBM12B	0.914		0.905	1.242		1.105	0.889		1.003	1.04092	1.06155	1.03331	0.910962	0.874396	0.836669	1.08234	1.02952	1.14958	0.87807		0.875825	1.36339		1.32071	0.821371		0.872494	1.58461	0.00510341	1.53037	0.0287661	1.03544	0.448819
F1RY40	568	S	Uncharacterized protein	RNA-binding protein 12B OS=Homo sapiens GN=RBM12B PE=1 SV=2	RNA-binding protein 12B-A OS=Mus musculus GN=Rbm12b1 PE=1 SV=2	RBM12B	0.767	0.865	0.896	1.465	1.127	1.05	0.833	1.032	1.062	1.04092	1.06155	1.03331	0.910962	0.874396	0.836669	1.08234	1.02952	1.14958	0.736849	0.814846	0.867115	1.60819	1.28889	1.25498	0.769631	1.0024	0.923817	1.54016	0.0294301	1.71657	0.0261506	0.897234	0.319469
F1RY40	278	S	Uncharacterized protein	RNA-binding protein 12B OS=Homo sapiens GN=RBM12B PE=1 SV=2	RNA-binding protein 12B-A OS=Mus musculus GN=Rbm12b1 PE=1 SV=2	RBM12B	0.922	0.852	0.931	1.24	1.248	0.971	0.882	0.944	1.104	1.04092	1.06155	1.03331	0.910962	0.874396	0.836669	1.08234	1.02952	1.14958	0.885756	0.802599	0.900986	1.3612	1.42727	1.16055	0.814903	0.916928	0.960352	1.46685	0.0183872	1.52511	0.0193541	0.9618	0.555549
F1RY40	499	S	Uncharacterized protein	RNA-binding protein 12B OS=Homo sapiens GN=RBM12B PE=1 SV=2	RNA-binding protein 12B-A OS=Mus musculus GN=Rbm12b1 PE=1 SV=2	RBM12B	1.205			0.658			1.118			1.04092	1.06155	1.03331	0.910962	0.874396	0.836669	1.08234	1.02952	1.14958	1.15763			0.722313			1.03295			0.699272		0.623958		1.1207
F1RY40	711	S	Uncharacterized protein	RNA-binding protein 12B OS=Homo sapiens GN=RBM12B PE=1 SV=2	RNA-binding protein 12B-A OS=Mus musculus GN=Rbm12b1 PE=1 SV=2	RBM12B	0.805	0.646	0.737	1.346	1.735	1.525	0.899	0.732	0.77	1.04092	1.06155	1.03331	0.910962	0.874396	0.836669	1.08234	1.02952	1.14958	0.773355	0.608544	0.713241	1.47756	1.98423	1.8227	0.83061	0.711008	0.669811	2.38963	0.0138353	2.52226	0.0127088	0.947414	0.599906
F1RY40	105	S	Uncharacterized protein	RNA-binding protein 12B OS=Homo sapiens GN=RBM12B PE=1 SV=2	RNA-binding protein 12B-A OS=Mus musculus GN=Rbm12b1 PE=1 SV=2	RBM12B	0.793			1.267			0.978			1.04092	1.06155	1.03331	0.910962	0.874396	0.836669	1.08234	1.02952	1.14958	0.761827			1.39084			0.9036			1.53922		1.82566		0.843101
F1RY46	221	S	Uncharacterized protein	Fibrinogen silencer-binding protein OS=Homo sapiens GN=FSBP PE=1 SV=1	Fibrinogen silencer-binding protein OS=Mus musculus GN=Fsbp PE=2 SV=1	FSBP
F1RY46	206	S	Uncharacterized protein	Fibrinogen silencer-binding protein OS=Homo sapiens GN=FSBP PE=1 SV=1	Fibrinogen silencer-binding protein OS=Mus musculus GN=Fsbp PE=2 SV=1	FSBP	0.7	0.678	0.654	1.57	1.632	1.577	0.806	0.788	0.795
F1RY51	80	S	Uncharacterized protein	Protein virilizer homolog OS=Homo sapiens GN=KIAA1429 PE=1 SV=2	Protein virilizer homolog OS=Mus musculus GN=Kiaa1429 PE=1 SV=1	KIAA1429	0.871		0.781	1.337		1.537	0.846		0.716		0.934279	1.05876		1.08325	0.877735		0.986793	1.06808			0.737652			1.7511			0.670364	2.61216		2.37388		1.10037
F1RY51	1523	S	Uncharacterized protein	Protein virilizer homolog OS=Homo sapiens GN=KIAA1429 PE=1 SV=2	Protein virilizer homolog OS=Mus musculus GN=Kiaa1429 PE=1 SV=1	KIAA1429	0.805	0.748	0.759	1.421	1.36	1.422	0.834	0.948	0.843		0.934279	1.05876		1.08325	0.877735		0.986793	1.06808		0.800617	0.716873		1.25549	1.62008		0.960688	0.78927	1.64322	0.155253	1.89495	0.152138	0.867159	0.384756
F1RY62	11	S	Uncharacterized protein	Phosphatidylserine synthase 1 OS=Homo sapiens GN=PTDSS1 PE=1 SV=1	Phosphatidylserine synthase 1 OS=Mus musculus GN=Ptdss1 PE=1 SV=1	PTDSS1	0.408	0.371	0.523	2.324	2.38	2.002	0.431	0.455	0.524			0.916667			1.13015			0.946495			0.570545			1.77145			0.553622	3.19975		3.10484		1.03057
F1RY63	627	S	Uncharacterized protein	Serine/threonine-protein phosphatase 6 regulatory subunit 3 OS=Homo sapiens GN=PPP6R3 PE=1 SV=2	Serine/threonine-protein phosphatase 6 regulatory subunit 3 OS=Mus musculus GN=Ppp6r3 PE=1 SV=1	PPP6R3	0.854	0.801	0.85	1.149	1.243	1.182	1.022	0.995	0.98	1.13647	1.11006	1.13247	0.764288	0.824856	0.815236	1.07926	1.05363	1.0322	0.751446	0.721582	0.750573	1.50336	1.50693	1.44989	0.946949	0.944356	0.949427	1.57008	0.00109556	2.00584	4.2629e-05	0.782756	0.00187745
F1RYA4	125	S	Uncharacterized protein	Nucleosome assembly protein 1-like 4 OS=Homo sapiens GN=NAP1L4 PE=1 SV=1	Nucleosome assembly protein 1-like 4 OS=Mus musculus GN=Nap1l4 PE=1 SV=1	NAP1L4	0.627		0.567	1.852		1.965	0.632		0.517	1.03964	0.950712	0.962483	1.00832	1.12949	1.04931	0.970155	0.975826	0.96489	0.603092		0.589101	1.83672		1.87267	0.651442		0.535813	3.12434	0.0179216	3.1114	0.00307732	1.00416	0.972872
F1RYA4	54	S	Uncharacterized protein	Nucleosome assembly protein 1-like 4 OS=Homo sapiens GN=NAP1L4 PE=1 SV=1	Nucleosome assembly protein 1-like 4 OS=Mus musculus GN=Nap1l4 PE=1 SV=1	NAP1L4	0.591	0.6		1.878	1.892		0.643	0.646		1.03964	0.950712	0.962483	1.00832	1.12949	1.04931	0.970155	0.975826	0.96489	0.568465	0.631106		1.86251	1.67509		0.66278	0.662003		2.67032	0.0537877	2.94905	0.0329347	0.905484	0.295266
F1RYA4	47	S	Uncharacterized protein	Nucleosome assembly protein 1-like 4 OS=Homo sapiens GN=NAP1L4 PE=1 SV=1	Nucleosome assembly protein 1-like 4 OS=Mus musculus GN=Nap1l4 PE=1 SV=1	NAP1L4	0.626	0.551	0.665	1.619	2.019	1.727	0.831	0.587	0.646	1.03964	0.950712	0.962483	1.00832	1.12949	1.04931	0.970155	0.975826	0.96489	0.60213	0.579565	0.690921	1.60565	1.78753	1.64585	0.856564	0.601542	0.669507	2.3684	0.000795507	2.6909	0.000273898	0.88015	0.389266
F1RYG9	110	S	Uncharacterized protein	Armadillo repeat-containing X-linked protein 3 OS=Homo sapiens GN=ARMCX3 PE=1 SV=1	Armadillo repeat-containing X-linked protein 3 OS=Mus musculus GN=Armcx3 PE=1 SV=1	ARMCX3	0.718	0.687	0.672	1.583	1.594	1.627	0.777	0.811	0.733	1.03445	1.08574	1.09771	0.925429	0.919637	0.888174	1.0329	0.975322	1.02215	0.694091	0.632749	0.612181	1.71056	1.73329	1.83185	0.752255	0.831521	0.717117	2.29289	4.18344e-05	2.7208	4.90957e-05	0.842726	0.0500117
F1RYL1	134	S	Uncharacterized protein	Nucleoporin NUP53 OS=Homo sapiens GN=NUP35 PE=1 SV=1	Nucleoporin NUP53 OS=Mus musculus GN=Nup35 PE=1 SV=2	---	0.869	0.743	0.817	1.273	1.458	1.324	0.902	0.872	0.881	0.981739	1.01575	1.0083	0.96918	0.959521	0.944203	1.0449	1.02127	1.04796	0.885164	0.731482	0.810272	1.31348	1.51951	1.40224	0.863243	0.853838	0.84068	1.65584	0.0104935	1.74511	0.00175307	0.948845	0.429712
F1RYL1	148	T	Uncharacterized protein	Nucleoporin NUP53 OS=Homo sapiens GN=NUP35 PE=1 SV=1	Nucleoporin NUP53 OS=Mus musculus GN=Nup35 PE=1 SV=2	---	0.66	0.653	0.605	1.7	1.535	1.65	0.732	0.892	0.772	0.981739	1.01575	1.0083	0.96918	0.959521	0.944203	1.0449	1.02127	1.04796	0.672277	0.642877	0.600018	1.75406	1.59976	1.74751	0.700547	0.873421	0.736668	2.20776	0.000219463	2.66364	0.000588497	0.82885	0.115192
F1RYL1	140	T	Uncharacterized protein	Nucleoporin NUP53 OS=Homo sapiens GN=NUP35 PE=1 SV=1	Nucleoporin NUP53 OS=Mus musculus GN=Nup35 PE=1 SV=2	---	0.804	0.577	0.783	1.411	1.845	1.426	0.845	0.706	0.817	0.981739	1.01575	1.0083	0.96918	0.959521	0.944203	1.0449	1.02127	1.04796	0.818955	0.568055	0.776552	1.45587	1.92283	1.51027	0.808692	0.691295	0.779609	2.14467	0.0225543	2.25969	0.0118217	0.949099	0.682749
F1RYL9	689	S	Uncharacterized protein	Ubiquitin carboxyl-terminal hydrolase 8 OS=Homo sapiens GN=USP8 PE=1 SV=1	Ubiquitin carboxyl-terminal hydrolase 8 OS=Mus musculus GN=Usp8 PE=1 SV=2	USP8	0.58	0.619	0.577	1.845	1.806	1.881	0.681	0.699	0.584	1.16147	1.09045		0.839626	0.894824		0.999099	1.0099		0.499367	0.567656		2.19741	2.01827		0.681614	0.692151		3.06871	0.0394358	3.95088	0.0188908	0.776715	0.132476
F1RYM3	1507	S	Uncharacterized protein	Transient receptor potential cation channel subfamily M member 7 OS=Homo sapiens GN=TRPM7 PE=1 SV=1	Transient receptor potential cation channel subfamily M member 7 OS=Mus musculus GN=Trpm7 PE=1 SV=1	TRPM7	0.291		0.313	2.471		2.368	0.413		0.377
F1RYP4	1022	S	Integrin, alpha 4 (Antigen CD49D, alpha 4 subunit of VLA-4 receptor)			ITGA4	0.876			1.309			0.865
F1RYP5	34	Y	Uncharacterized protein	Pre-mRNA-splicing factor CWC22 homolog OS=Homo sapiens GN=CWC22 PE=1 SV=3	Pre-mRNA-splicing factor CWC22 homolog OS=Mus musculus GN=Cwc22 PE=1 SV=1	CWC22	0.503	0.85		2.094	1.367		0.541	0.847		0.936599	1.04571	0.980411	1.0598	0.904643	0.914555	1.00295	1.03742	1.08387	0.537049	0.812844		1.97584	1.51109		0.539408	0.816446		2.57176	0.0810445	2.58312	0.0808886	0.995604	0.98922
F1RYP5	40	S	Uncharacterized protein	Pre-mRNA-splicing factor CWC22 homolog OS=Homo sapiens GN=CWC22 PE=1 SV=3	Pre-mRNA-splicing factor CWC22 homolog OS=Mus musculus GN=Cwc22 PE=1 SV=1	CWC22	0.592	0.433	0.534	1.872	2.157	1.897	0.647	0.581	0.61	0.936599	1.04571	0.980411	1.0598	0.904643	0.914555	1.00295	1.03742	1.08387	0.632074	0.414072	0.544669	1.76637	2.38437	2.07423	0.645096	0.560041	0.562798	3.52104	0.0125263	3.91306	0.00733356	0.899816	0.461544
F1RYP5	97	S	Uncharacterized protein	Pre-mRNA-splicing factor CWC22 homolog OS=Homo sapiens GN=CWC22 PE=1 SV=3	Pre-mRNA-splicing factor CWC22 homolog OS=Mus musculus GN=Cwc22 PE=1 SV=1	CWC22	1.105	0.983	1.019	0.928	0.901	0.929	0.98	1.108	1.061	0.936599	1.04571	0.980411	1.0598	0.904643	0.914555	1.00295	1.03742	1.08387	1.1798	0.940031	1.03936	0.875635	0.995973	1.01579	0.977116	1.06803	0.978899	0.954814	0.445114	0.913969	0.342774	1.04469	0.597867
F1RYP5	825	S	Uncharacterized protein	Pre-mRNA-splicing factor CWC22 homolog OS=Homo sapiens GN=CWC22 PE=1 SV=3	Pre-mRNA-splicing factor CWC22 homolog OS=Mus musculus GN=Cwc22 PE=1 SV=1	CWC22	0.565	0.483	0.565	1.982	2.059	1.901	0.579	0.616	0.578	0.936599	1.04571	0.980411	1.0598	0.904643	0.914555	1.00295	1.03742	1.08387	0.603246	0.461887	0.576289	1.87016	2.27604	2.07861	0.577296	0.593779	0.533274	3.6523	0.00512959	3.79232	0.00254084	0.963079	0.688671
F1RYR4	149	S	Uncharacterized protein	Activating signal cointegrator 1 complex subunit 3 OS=Homo sapiens GN=ASCC3 PE=1 SV=3	Activating signal cointegrator 1 complex subunit 3 OS=Mus musculus GN=Ascc3 PE=1 SV=1	---										0.913144			1.14725			0.944687
F1RYS7	1300	S	Uncharacterized protein	Protein Shroom3 OS=Homo sapiens GN=SHROOM3 PE=1 SV=2	Protein Shroom3 OS=Mus musculus GN=Shroom3 PE=1 SV=2	SHROOM3	0.695	0.652	0.687	1.62	1.654	1.557	0.766	0.794	0.785
F1RYS9	173	S	Uncharacterized protein	Starch-binding domain-containing protein 1 OS=Homo sapiens GN=STBD1 PE=1 SV=1	Starch-binding domain-containing protein 1 OS=Mus musculus GN=Stbd1 PE=1 SV=1	STBD1	0.45	0.412	0.495	2.183	2.31	2.078	0.513	0.475	0.479	0.908759	0.918707	0.95006	1.08475	1.16881	1.03698	0.977938	0.935188	0.958954	0.495181	0.448456	0.52102	2.01245	1.97637	2.00389	0.524573	0.507919	0.499503	3.9117	2.19397e-07	4.09155	9.18681e-06	0.956046	0.405385
F1RYT5	292	S	Uncharacterized protein	Nucleoporin p54 OS=Homo sapiens GN=NUP54 PE=1 SV=2	Nuclear pore complex protein Nup54 OS=Mus musculus GN=Nup54 PE=1 SV=1	NUP54	0.946	1.029		0.915	0.852		1.138	1.107		1.06802	1.09399	1.04001	0.786604	0.801882	0.902841	1.09172	1.07198	1.0366	0.885752	0.940595		1.16323	1.0625		1.04239	1.03267		1.07261	0.373331	1.21868	0.104838	0.880143	0.129116
F1RYU6	580	Y	Uncharacterized protein	Protein SDA1 homolog OS=Homo sapiens GN=SDAD1 PE=1 SV=3	Protein SDA1 homolog OS=Mus musculus GN=Sdad1 PE=1 SV=1	SDAD1	0.778			1.433			0.85			0.741346	0.73478		1.35614	1.51144		0.910641	0.791945		1.04944			1.05668			0.933408			1.13206		1.00689		1.12431
F1RYU6	585	S	Uncharacterized protein	Protein SDA1 homolog OS=Homo sapiens GN=SDAD1 PE=1 SV=3	Protein SDA1 homolog OS=Mus musculus GN=Sdad1 PE=1 SV=1	SDAD1	0.643	0.589	0.644	1.833	1.888	1.755	0.633	0.659	0.64	0.741346	0.73478		1.35614	1.51144		0.910641	0.791945		0.867341	0.801601		1.35163	1.24914		0.695115	0.832128		1.70292	0.0294203	1.55834	0.025639	1.09278	0.480684
F1RYX5	176	S	Uncharacterized protein	Deformed epidermal autoregulatory factor 1 homolog OS=Homo sapiens GN=DEAF1 PE=1 SV=1	Deformed epidermal autoregulatory factor 1 homolog OS=Mus musculus GN=Deaf1 PE=1 SV=1	DEAF1	0.775	0.735	0.669	1.509	1.635	1.673	0.788	0.733	0.694
F1RYY0	256	S	Uncharacterized protein	Peptidyl-prolyl cis-trans isomerase FKBP5 OS=Homo sapiens GN=FKBP5 PE=1 SV=2	Peptidyl-prolyl cis-trans isomerase FKBP5 OS=Mus musculus GN=Fkbp5 PE=1 SV=1	FKBP5	1.2	1.058	1.177	0.621	0.769	0.584	1.154	1.148	1.235	1.34538	1.30857	1.2343	0.416481	0.460103	0.567583	1.2211	1.20059	1.20617	0.891938	0.808513	0.953576	1.49106	1.67137	1.02892	0.945053	0.9562	1.0239	1.43287	0.156058	1.57924	0.109536	0.907312	0.154069
F1RYZ0	102	S	60S acidic ribosomal protein P2			RPLP2	0.722	0.648	0.873	1.613	1.693	1.415	0.748	0.765	0.747	0.717202	0.731445	0.823432	1.54353	1.49226	1.30133	0.77731	0.833941	0.861544	1.00669	0.885917	1.0602	1.045	1.13452	1.08735	0.962293	0.917331	0.867048	1.18939	0.0101736	1.10636	0.168738	1.07505	0.32306
F1RYZ0	86	S	60S acidic ribosomal protein P2			RPLP2	0.51		0.565	2.138		1.95	0.496		0.532	0.717202	0.731445	0.823432	1.54353	1.49226	1.30133	0.77731	0.833941	0.861544	0.711096		0.686152	1.38513		1.49847	0.638098		0.617496	2.2966	0.0382869	2.06377	0.0396019	1.11282	0.0515464
F1RYZ0	105	S	60S acidic ribosomal protein P2			RPLP2	0.684	0.594	0.878	1.65	1.819	1.438	0.751	0.712	0.719	0.717202	0.731445	0.823432	1.54353	1.49226	1.30133	0.77731	0.833941	0.861544	0.953706	0.812091	1.06627	1.06898	1.21895	1.10502	0.966152	0.853777	0.834549	1.2782	0.0159985	1.19805	0.110137	1.0669	0.530713
F1RYZ0	79	S	60S acidic ribosomal protein P2			RPLP2	0.591		0.478	1.829		1.981	0.684		0.583	0.717202	0.731445	0.823432	1.54353	1.49226	1.30133	0.77731	0.833941	0.861544	0.824035		0.580497	1.18494		1.52229	0.879958		0.676692	1.73914	0.125249	1.9275	0.099806	0.902279	0.680202
F1RYZ3	148	S	Transcriptional enhancer factor TEF-5			TEAD3	0.715	0.634		1.576	1.639		0.786	0.822
F1RZ24	464	S	Uncharacterized protein	H/ACA ribonucleoprotein complex subunit 4 OS=Homo sapiens GN=DKC1 PE=1 SV=3	H/ACA ribonucleoprotein complex subunit 4 OS=Mus musculus GN=Dkc1 PE=1 SV=4	DKC1	0.551	0.545	0.567	2.017	2.007	1.881	0.561	0.602	0.594	1.037	1.05634	1.10405	1.04428	1.03909	0.916335	0.926053	0.896806	0.982322	0.531341	0.515932	0.513565	1.93148	1.9315	2.05274	0.605797	0.671271	0.60469	3.14372	7.04961e-05	3.79009	0.000632597	0.829458	0.0332883
F1RZ24	468	S	Uncharacterized protein	H/ACA ribonucleoprotein complex subunit 4 OS=Homo sapiens GN=DKC1 PE=1 SV=3	H/ACA ribonucleoprotein complex subunit 4 OS=Mus musculus GN=Dkc1 PE=1 SV=4	DKC1	0.505	0.336	0.589	2.053	2.45	1.866	0.573	0.43	0.588	1.037	1.05634	1.10405	1.04428	1.03909	0.916335	0.926053	0.896806	0.982322	0.486982	0.318079	0.533492	1.96595	2.35783	2.03637	0.618755	0.479479	0.598582	3.74829	0.00271504	4.75152	0.00103758	0.788862	0.213495
F1RZ24	462	S	Uncharacterized protein	H/ACA ribonucleoprotein complex subunit 4 OS=Homo sapiens GN=DKC1 PE=1 SV=3	H/ACA ribonucleoprotein complex subunit 4 OS=Mus musculus GN=Dkc1 PE=1 SV=4	DKC1	0.6	0.643	0.623	1.992	1.562	1.794	0.537	0.878	0.623	1.037	1.05634	1.10405	1.04428	1.03909	0.916335	0.926053	0.896806	0.982322	0.578592	0.608705	0.564288	1.90754	1.50324	1.9578	0.57988	0.97903	0.634212	2.44792	0.00544463	3.06498	0.0133816	0.798672	0.359965
F1RZ24	502	S	Uncharacterized protein	H/ACA ribonucleoprotein complex subunit 4 OS=Homo sapiens GN=DKC1 PE=1 SV=3	H/ACA ribonucleoprotein complex subunit 4 OS=Mus musculus GN=Dkc1 PE=1 SV=4	DKC1	0.532	0.505	0.571	2.056	2.075	1.91	0.546	0.583	0.564	1.037	1.05634	1.10405	1.04428	1.03909	0.916335	0.926053	0.896806	0.982322	0.513019	0.478066	0.517188	1.96883	1.99694	2.08439	0.589599	0.650085	0.57415	3.33556	1.65469e-05	4.01131	0.000133499	0.831539	0.0293634
F1RZ24	520	S	Uncharacterized protein	H/ACA ribonucleoprotein complex subunit 4 OS=Homo sapiens GN=DKC1 PE=1 SV=3	H/ACA ribonucleoprotein complex subunit 4 OS=Mus musculus GN=Dkc1 PE=1 SV=4	DKC1	0.459	0.397	0.559	2.311	2.316	2.106	0.396	0.484	0.394	1.037	1.05634	1.10405	1.04428	1.03909	0.916335	0.926053	0.896806	0.982322	0.442623	0.375826	0.506319	2.21301	2.22887	2.29829	0.427621	0.539693	0.401091	4.92557	1.9998e-05	5.08781	7.77465e-06	0.968112	0.81061
F1RZ28	146	S	Uncharacterized protein	40S ribosomal protein S10 OS=Homo sapiens GN=RPS10 PE=1 SV=1	40S ribosomal protein S10 OS=Mus musculus GN=Rps10 PE=1 SV=1	RPS10	0.632	0.628		1.785	1.75		0.684	0.736		1.23938	1.18102	1.40999	0.750044	0.942791	0.666769	1.0183	0.852244	0.995215	0.509933	0.531742		2.37986	1.85619		0.671705	0.863602		2.75909	0.0911188	4.06658	0.102948	0.67848	0.232333
F1RZ67	119	S	Inactive rhomboid protein			RHBDF2	0.864	0.772		1.418	1.319		0.784	0.958		0.878914	0.691911	0.907584	1.25082	1.46295	1.15603	0.890425	0.873976	0.955451	0.983031	1.11575		1.13366	0.901606		0.880479	1.09614		1.02967	0.870284	0.969737	0.839182	1.0618	0.685429
F1RZ67	60	S	Inactive rhomboid protein			RHBDF2	0.654			1.764			0.684			0.878914	0.691911	0.907584	1.25082	1.46295	1.15603	0.890425	0.873976	0.955451	0.7441			1.41028			0.768173			1.83589		1.89528		0.968662
F1RZ67	148	S	Inactive rhomboid protein			RHBDF2	0.763	0.774	0.762	1.445	1.466	1.507	0.853	0.835	0.762	0.878914	0.691911	0.907584	1.25082	1.46295	1.15603	0.890425	0.873976	0.955451	0.868116	1.11864	0.839591	1.15525	1.00209	1.3036	0.95797	0.955403	0.797529	1.27667	0.0835882	1.22452	0.163872	1.04259	0.732379
F1RZ71	85	S	Uncharacterized protein	Septin-9 OS=Homo sapiens GN=SEPT9 PE=1 SV=2	Septin-9 OS=Mus musculus GN=Sept9 PE=1 SV=1	SEPT9	0.803	0.798	0.817	1.256	1.547	1.421	0.978	0.747	0.791	1.15556	1.01362	0.933317	0.806898	0.931198	1.28943	1.03444	1.0482	0.812322	0.694899	0.787278	0.875373	1.55658	1.6613	1.10204	0.945435	0.712653	0.973751	1.64141	0.0629464	1.83238	0.0522604	0.89578	0.411685
F1RZ77	246	S	Uncharacterized protein	Chromobox protein homolog 8 OS=Homo sapiens GN=CBX8 PE=1 SV=3	Chromobox protein homolog 8 OS=Mus musculus GN=Cbx8 PE=1 SV=1	CBX8	0.678			1.62			0.782				1.06236			0.989019			0.952557
F1RZ78	291	S	Uncharacterized protein	E3 SUMO-protein ligase CBX4 OS=Homo sapiens GN=CBX4 PE=1 SV=3	E3 SUMO-protein ligase CBX4 OS=Mus musculus GN=Cbx4 PE=1 SV=2	CBX4	0.406	0.345	0.489	2.248	2.38	2.1	0.498	0.48	0.463
F1RZ78	406	S	Uncharacterized protein	E3 SUMO-protein ligase CBX4 OS=Homo sapiens GN=CBX4 PE=1 SV=3	E3 SUMO-protein ligase CBX4 OS=Mus musculus GN=Cbx4 PE=1 SV=2	CBX4	0.471	0.404	0.423	2.167	2.201	2.117	0.506	0.573	0.507
F1RZA9	514	S	Uncharacterized protein	Centrosomal protein of 131 kDa OS=Homo sapiens GN=CEP131 PE=1 SV=3	Centrosomal protein of 131 kDa OS=Mus musculus GN=Cep131 PE=1 SV=2	CEP131			0.589			1.841			0.611	0.950326	0.91992	0.85026	1.09488	1.13356	1.07	0.958606	0.955582	1.06695			0.69273			1.72055			0.572661	3.00449		2.48373		1.20967
F1RZA9	547	S	Uncharacterized protein	Centrosomal protein of 131 kDa OS=Homo sapiens GN=CEP131 PE=1 SV=3	Centrosomal protein of 131 kDa OS=Mus musculus GN=Cep131 PE=1 SV=2	CEP131	0.493	0.489		2.107	2.123		0.538	0.558		0.950326	0.91992	0.85026	1.09488	1.13356	1.07	0.958606	0.955582	1.06695	0.51877	0.531568		1.92441	1.87287		0.561232	0.583938		3.31591	0.00358769	3.61529	0.00779895	0.91719	0.0957299
F1RZB7	630	S	Uncharacterized protein	RNA polymerase-associated protein LEO1 OS=Homo sapiens GN=LEO1 PE=1 SV=1	RNA polymerase-associated protein LEO1 OS=Mus musculus GN=Leo1 PE=1 SV=2	LEO1	0.59	0.55	0.608	1.845	1.883	1.723	0.672	0.699	0.703	1.02581	1.02449	1.02354	0.902288	0.94765	0.975276	1.04174	1.00767	0.99114	0.575154	0.536853	0.594016	2.0448	1.98702	1.76668	0.645077	0.693681	0.709284	2.83124	0.00317495	3.39884	0.00287023	0.833002	0.0117488
F1RZB7	655	Y	Uncharacterized protein	RNA polymerase-associated protein LEO1 OS=Homo sapiens GN=LEO1 PE=1 SV=1	RNA polymerase-associated protein LEO1 OS=Mus musculus GN=Leo1 PE=1 SV=2	LEO1	0.666	0.677	0.592	1.62	1.661	1.84	0.794	0.765	0.609	1.02581	1.02449	1.02354	0.902288	0.94765	0.975276	1.04174	1.00767	0.99114	0.649242	0.660817	0.578384	1.79543	1.75276	1.88665	0.762189	0.759178	0.614444	2.54462	8.38609e-05	2.87795	5.0956e-05	0.884181	0.230666
F1RZB7	614	S	Uncharacterized protein	RNA polymerase-associated protein LEO1 OS=Homo sapiens GN=LEO1 PE=1 SV=1	RNA polymerase-associated protein LEO1 OS=Mus musculus GN=Leo1 PE=1 SV=2	LEO1	0.533	0.483	0.478	1.938	2.004	1.996	0.645	0.661	0.568	1.02581	1.02449	1.02354	0.902288	0.94765	0.975276	1.04174	1.00767	0.99114	0.519589	0.471455	0.467006	2.14787	2.11471	2.0466	0.619159	0.65597	0.573077	3.41368	4.12564e-06	4.32714	1.31458e-05	0.7889	0.0144755
F1RZB7	279	S	Uncharacterized protein	RNA polymerase-associated protein LEO1 OS=Homo sapiens GN=LEO1 PE=1 SV=1	RNA polymerase-associated protein LEO1 OS=Mus musculus GN=Leo1 PE=1 SV=2	LEO1	0.556	0.539	0.495	1.903	2	2.034	0.653	0.613	0.519	1.02581	1.02449	1.02354	0.902288	0.94765	0.975276	1.04174	1.00767	0.99114	0.54201	0.526116	0.483615	2.10908	2.11048	2.08556	0.626838	0.608335	0.523639	3.58488	0.00020798	4.06326	7.35292e-06	0.882266	0.149806
F1RZB7	658	S	Uncharacterized protein	RNA polymerase-associated protein LEO1 OS=Homo sapiens GN=LEO1 PE=1 SV=1	RNA polymerase-associated protein LEO1 OS=Mus musculus GN=Leo1 PE=1 SV=2	LEO1										1.02581	1.02449	1.02354	0.902288	0.94765	0.975276	1.04174	1.00767	0.99114
F1RZD2	602	S	Uncharacterized protein	Unconventional myosin-Va OS=Homo sapiens GN=MYO5A PE=1 SV=2	Unconventional myosin-Va OS=Mus musculus GN=Myo5a PE=1 SV=2	MYO5A	0.824	0.799	0.822	1.331	1.379	1.232	0.895	0.884	0.961	0.933106	0.92036	0.96305	1.12829	1.19775	1.00196	0.93451	0.89503	0.964847	0.883072	0.868139	0.853538	1.17967	1.15132	1.22959	0.957721	0.987676	0.996013	1.2105	0.00417274	1.36696	0.00212852	0.885544	0.00207922
F1RZE0	130	S	Uncharacterized protein	Interferon-inducible double-stranded RNA-dependent protein kinase activator A OS=Homo sapiens GN=PRKRA PE=1 SV=1	Interferon-inducible double-stranded RNA-dependent protein kinase activator A OS=Mus musculus GN=Prkra PE=1 SV=1	PRKRA	0.829		0.841	1.402		1.195	0.83		0.979	1.00623	1.00994	1.01521	0.866942	0.924571	0.77423	1.10261	1.065	1.17697	0.823868		0.828398	1.61718		1.54347	0.752759		0.831799	1.99466	0.00476198	1.91292	0.0304861	1.04273	0.54882
F1RZE0	18	S	Uncharacterized protein	Interferon-inducible double-stranded RNA-dependent protein kinase activator A OS=Homo sapiens GN=PRKRA PE=1 SV=1	Interferon-inducible double-stranded RNA-dependent protein kinase activator A OS=Mus musculus GN=Prkra PE=1 SV=1	PRKRA	0.484	0.384	0.433	2.121	2.346	2.077	0.534	0.472	0.535	1.00623	1.00994	1.01521	0.866942	0.924571	0.77423	1.10261	1.065	1.17697	0.481004	0.380219	0.426512	2.44653	2.53739	2.68267	0.484305	0.443192	0.454558	5.54724	0.000784927	5.95355	0.000202291	0.931753	0.40074
F1RZE0	167	S	Uncharacterized protein	Interferon-inducible double-stranded RNA-dependent protein kinase activator A OS=Homo sapiens GN=PRKRA PE=1 SV=1	Interferon-inducible double-stranded RNA-dependent protein kinase activator A OS=Mus musculus GN=Prkra PE=1 SV=1	PRKRA	0.939	0.748		1.152	1.308		0.942	0.991		1.00623	1.00994	1.01521	0.866942	0.924571	0.77423	1.10261	1.065	1.17697	0.933187	0.740636		1.32881	1.41471		0.854337	0.930516		1.53711	0.0146469	1.63907	0.0739108	0.937793	0.668798
F1RZF2	34	S	Uncharacterized protein	Pygopus homolog 1 OS=Homo sapiens GN=PYGO1 PE=1 SV=2	Pygopus homolog 1 OS=Mus musculus GN=Pygo1 PE=1 SV=1	PYGO1	0.507	0.426	0.568	2.06	2.113	1.839	0.565	0.624	0.632
F1RZF6	167	S	Uncharacterized protein	DNA-binding protein RFX7 OS=Homo sapiens GN=RFX7 PE=1 SV=1	DNA-binding protein Rfx5 OS=Mus musculus GN=Rfx5 PE=1 SV=2	RFX7
F1RZI1	112	S	Uncharacterized protein	Cyclic AMP-dependent transcription factor ATF-2 OS=Homo sapiens GN=ATF2 PE=1 SV=4	Cyclic AMP-dependent transcription factor ATF-2 OS=Mus musculus GN=Atf2 PE=1 SV=2	ATF2	0.404	0.424	0.358	2.268	2.238	2.297	0.482	0.523	0.4
[truncated: 5,671 more rows]

## Sheet: Reproducibility analysis
A1	A2	A3	H1	H2	H3	SA1	SA2	SA3
[truncated: 6,421 more rows]

## Sheet: repeat1
Protein accession	Position	Amino acid	Protein description	Gene name	Localization probability	PEP	Score	Modified sequence	Charge	Mass error [ppm]	MS/MS Count	A1	H1	SA1	H1/SA1 Ratio	H1/A1 Ratio	A1/SA1 Ratio
[truncated: 4,872 more rows]

[truncated: 2 more sheets: repeat2, repeat3]
